# Supplementary material for: Regulation of autophagy and lipid accumulation under phosphate limitation in Rhodotorula toruloides
Source: Frontiers journal article supplement (doi:10.3389/fmicb.2022.1046114), 2023-01-26
Supplement: Image_1.pdf [file Image_1.pdf]

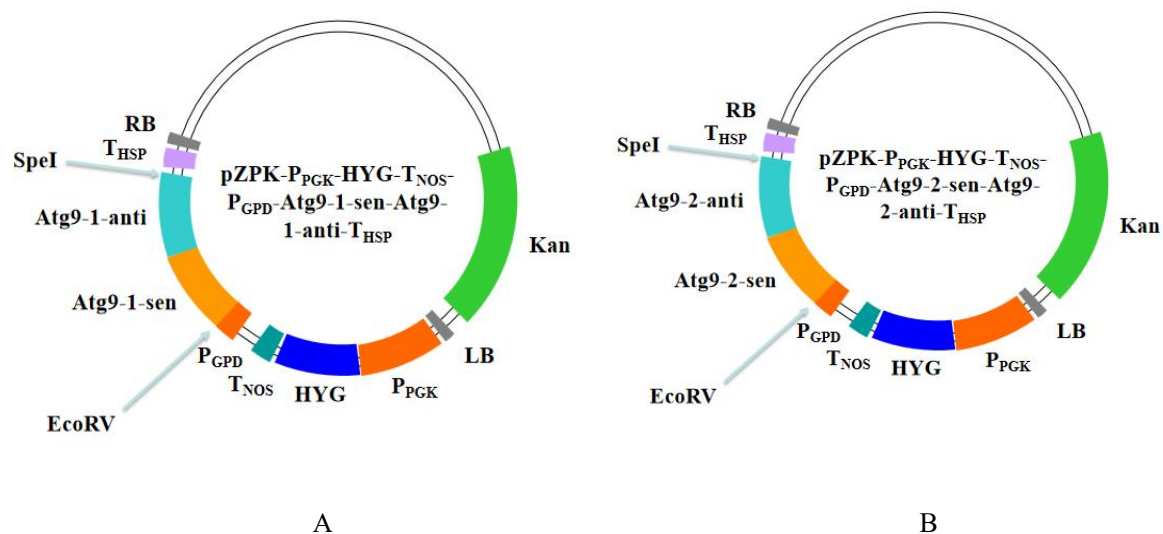

**Fig. S1** Organization of the RNAi vector plasmids. P<sub>PGK</sub>, the phosphoglycerate kinase promoter; HYG, hygromycin gene; T<sub>NOS</sub>, the nos terminator; P<sub>GPD</sub>, the glycerol 3 phosphate dehydrogenase promoter; Atg9, autophagy related protein 9; T<sub>HSP</sub>, heat shock protein terminator; LB: left border; RB: right border.
