# Supplementary material for: Regulation of autophagy and lipid accumulation under phosphate limitation in Rhodotorula toruloides
Source: Frontiers journal article supplement (doi:10.3389/fmicb.2022.1046114), 2023-01-26
Supplement: Image_2.pdf [file Image_2.pdf]

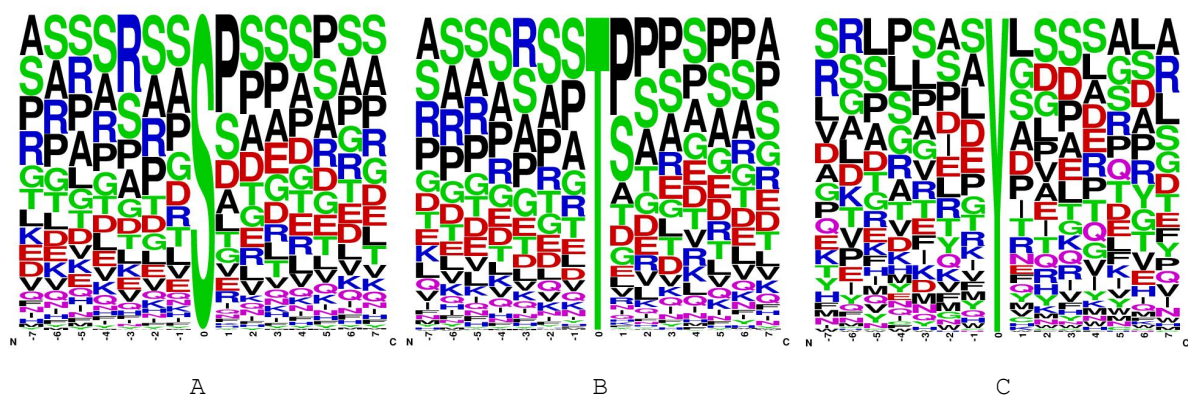

Fig. S2 Distribution of amino acids surrounding the phosphorylation site by WebLog.(A) Ser; (B) Thr; (C)Tyr.
