# Supplementary material for: Regulation of autophagy and lipid accumulation under phosphate limitation in Rhodotorula toruloides
Source: Frontiers journal article supplement (doi:10.3389/fmicb.2022.1046114), 2023-01-26
Supplement: Image_3.pdf [file Image_3.pdf]

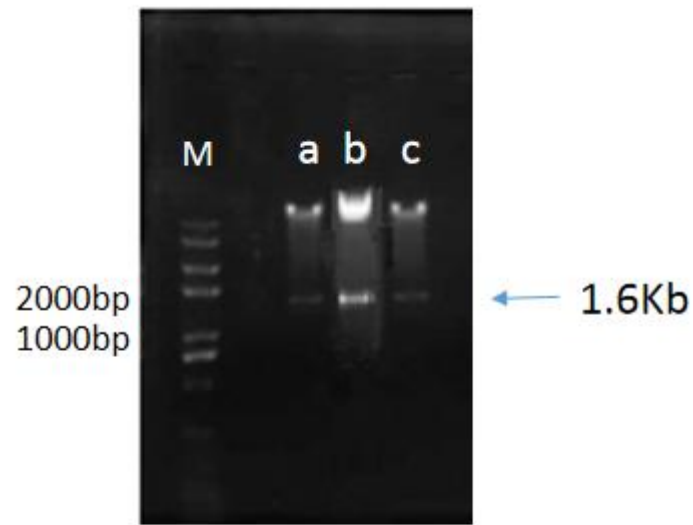

Fig. S3 The electrophoresis map for identification of recombinant pZPK-P<sub>PGK</sub>-HYG-T<sub>NOS</sub>-P<sub>GPD</sub>-A tg9-1-sen-Atg9-1-anti-T<sub>HSP</sub> (a and c) and pZPK-P<sub>PGK</sub>-HYG-T<sub>NOS</sub>-P<sub>GPD</sub>-Atg9-2-sen-Atg9-2-anti-T<sub>HSP</sub> (b) digested with EcoRV and SpeI.
