# Supplementary material for: Regulation of autophagy and lipid accumulation under phosphate limitation in Rhodotorula toruloides
Source: Front Microbiol. 2023 Jan 26;13:1046114. doi: 10.3389/fmicb.2022.1046114 (PMC9908577; doi:10.3389/fmicb.2022.1046114)
Supplement: Supplementary file 5 [file Table_2.xls]

## Sheet: Sheet1
Table S2. Differentially expressed proteins between "P0" and "F3"
Note: NaN: not detectable; #VALUE!：not computable.
Proteins ID		Annotation	Unique Peptide			Unique Peptide			Raw Ratio H/M			Normalized Ratio H/M			Statistics test
															P0:F3	CVa
			1	2	3	1	2	3	H/M-1	H/M-2	H/M-3	H/M-1	H/M-2	H/M-3		STDEV(P0:F3)
Autophagy-related (Atg) proteins
gi|472583960	RHTO_01636	autophagy-related protein 3	6	2	2	6	2	2	0.43513	0.80301	0.582	0.61583	1.6192	1.5219	0.666171	0.053712
gi|472580550	RHTO_06485	autophagy-related protein 5	2	0	0	2	0	0	0.90617	NaN	NaN	1.1259	0.53361	0.57891	1.71821	0.160596
gi|472584768	RHTO_00622	autophagy-related protein 7	1	1	0	1	1	0	0.66756	0.3793	NaN	0.87208	0.49508	1.1716	1.37669	0.592363
gi|472580505	RHTO_06526	GABA(A) receptor-associated protein	2	6	6	2	6	6	0.8183	0.96821	0.93614	0.92652	0.41597	0.51934	1.99755	0.375666
gi|472584998	RHTO_00852	autophagy-related protein 11	1	0	1	1	0	1	0.31274	NaN	0.63746	0.45572	NaN	0.71884	1.30401	0.12321
gi|472584697	RHTO_01037	autophagy-related protein 12	1	1	0	1	1	0	0.51028	0.72127	NaN	0.71944	1.0719	2.7952	1.05245	0.761531
gi|472583066	RHTO_02334	WD repeat domain phosphoinositide-interacting protein	0	1	2	0	1	2	NaN	1.447	1.1919	NaN	1.8154	1.2227	0.684352	0.188811
gi|472581938	RHTO_04181	sorting nexin-41	2	2	5	1	1	1	1.0554	0.44993	0.69448	1.4057	1.4993	1.0974	0.923354	0.26264
gi|472587297	RHTO_04976	lipid binding protein	8	7	7	8	7	7	0.5611	0.63262	0.77414	0.70079	0.90704	0.83672	1.21078	0.116895
gi|472585862	RHTO_07138	sterol 3-beta-glucosyltransferase, glycosyltransferase family 1 protein	1	4	2	1	2	0	0.66882	1.302	0.80514	0.74043	1.1378	1.4051	0.787992	0.0845484
gi|472586630	RHTO_06153	autophagy-related protein 27	2	1	1	2	1	1	1.2243	0.24128	0.44047	1.6678	0.49859	0.41161	2.25129	0.219816
Ribosomome protein
gi|472581130	RHTO_05447	40S ribosomal protein s16	9	8	10	1	0	1	2.1385	2.2544	2.5845	2.7796	2.3428	2.0958	0.421249	0.0588897
gi|472581200	RHTO_05517	60S ribosomal protein l6	20	23	24	0	1	1	NaN	11.645	29.057	NaN	12.416	23.241	0.0617843	0.0265263
gi|472581252	RHTO_05368	40S ribosomal protein s26	8	7	9	8	7	9	1.7042	2.9817	2.6609	2.3816	3.5957	2.4633	0.367985	0.078145
gi|472581399	RHTO_05301	60S ribosomal protein l10a	14	12	14	14	12	14	1.9938	2.2341	2.5244	2.5991	2.6391	2.2835	0.40053	0.0325154
gi|472581449	RHTO_05130	40S ribosomal protein s19	12	15	13	12	15	13	2.1067	2.4473	2.9931	2.8903	2.6553	2.3341	0.383674	0.0416749
gi|472581561	RHTO_04481	30S ribosomal protein s10	6	6	5	1	0	0	1.1954	1.8761	1.5795	1.5884	2.0963	1.6062	0.576394	0.0861218
gi|472581793	RHTO_04282	50S ribosomal protein	4	3	4	3	2	3	1.764	2.7588	2.5308	2.3011	3.0899	2.6039	0.38075	0.055543
gi|472581835	RHTO_04325	40S ribosomal protein s6	10	11	11	10	11	11	2.6326	2.7542	2.6838	3.4028	2.951	2.1892	0.363177	0.0841326
gi|472581836	RHTO_04326	40S ribosomal protein s13	8	13	11	8	13	11	2.3065	1.7503	3.3269	3.2996	2.4978	3.0602	0.343398	0.050728
gi|472581973	RHTO_04216	40S ribosomal protein s14	9	11	11	9	11	11	2.1161	4.1136	3.0332	2.7654	4.2978	2.4489	0.334212	0.0909835
gi|472582054	RHTO_04048	60S ribosomal protein l24	11	9	8	6	6	8	1.6455	1.7001	3.0583	2.4913	2.2434	2.9147	0.396746	0.0514895
gi|472582120	RHTO_04114	60S ribosomal protein l18	8	7	9	7	6	8	4.4879	3.1552	3.9212	6.2686	3.427	3.2654	0.252522	0.0808608
gi|472582225	RHTO_03965	60S ribosomal protein l7	18	16	16	18	16	16	2.3774	3.0953	2.7293	3.3531	3.3622	2.2292	0.348082	0.0870443
gi|472582227	RHTO_03967	60S ribosomal protein l36	7	8	8	7	8	8	1.6377	3.1609	2.5469	2.2995	3.3477	2.0556	0.406689	0.0970037
gi|472582230	RHTO_03970	50S ribosomal protein l22	6	4	5	3	1	2	1.0589	1.3864	1.4516	1.175	1.4433	1.1057	0.816108	0.110021
gi|472582418	RHTO_03637	40S ribosomal protein s9	11	15	13	11	15	13	2.7652	2.2412	3.3112	3.7903	2.4984	2.7635	0.341982	0.070351
gi|472582443	RHTO_03663	50S ribosomal protein L10	6	5	6	0	2	2	NaN	2.1054	2.8231	NaN	2.8532	2.6966	0.360661	0.0143922
gi|472582445	RHTO_03665	60S ribosomal protein l21	9	14	11	9	14	11	2.3728	2.8494	2.9197	2.8949	2.8988	2.8329	0.3478	0.00450498
gi|472582479	RHTO_03699	60S ribosomal protein l28	7	2	2	7	2	2	0.13975	0.09407	0.71604	0.18336	0.10738	0.64068	5.44244	3.87595
gi|472582517	RHTO_03737	60S ribosomal protein l20	12	16	15	12	16	15	3.9139	1.9616	2.3759	5.0079	2.1602	2.3455	0.362984	0.142599
gi|472582519	RHTO_03740	60S ribosomal protein	4	3	5	4	3	5	1.5468	1.7695	1.9475	1.9176	2.1198	2.0546	0.493314	0.0255198
gi|472582554	RHTO_03468	50S ribosomal protein l1	4	6	8	1	3	3	1.6672	1.4981	2.1109	2.5408	1.8032	2.0333	0.479986	0.0811453
gi|472582967	RHTO_02577	60S ribosomal protein l23	6	6	6	6	6	6	2.5792	2.1147	2.2172	2.8432	2.7402	1.9579	0.409135	0.0882504
gi|472583133	RHTO_02403	40S ribosomal protein s25	7	10	8	7	10	8	2.3443	3.466	3.3248	2.6392	3.3626	2.8087	0.344109	0.0420454
gi|472583160	RHTO_02430	60S ribosomal protein l7 l12	5	5	4	5	5	4	2.3285	1.9011	2.4182	3.0464	2.3694	2.5897	0.378816	0.0473233
gi|472583185	RHTO_02455	60S ribosomal protein l26	5	8	7	5	8	7	2.3127	3.3408	4.6771	3.2429	3.7107	4.0714	0.274491	0.0316725
gi|472583213	RHTO_02483	40S ribosomal protein s27	2	4	2	2	4	2	1.4326	3.1254	2.3944	1.971	3.9517	2.3755	0.393792	0.12931
gi|472583244	RHTO_02144	37S ribosomal protein s5	4	4	5	1	1	2	1.5263	2.1271	1.6512	1.8695	2.2648	1.5384	0.542156	0.104432
gi|472583271	RHTO_02290	60S ribosomal protein l10	16	16	16	6	4	4	1.4134	1.7888	1.6883	1.7429	1.9094	1.6464	0.568289	0.0420977
gi|472583286	RHTO_02175	60S acidic ribosomal protein p2	5	7	7	5	7	7	1.0161	0.71429	0.51454	1.0585	0.78916	0.47627	1.43718	0.595933
gi|472583287	RHTO_02296	50S ribosomal protein l24	3	5	2	3	5	2	1.9855	2.6806	2.021	2.6281	3.4893	2.035	0.386165	0.102522
gi|472583326	RHTO_02232	60S acidic ribosomal protein p0	9	14	15	0	0	1	2.4634	2.2781	3.0661	2.9071	2.485	2.8275	0.36669	0.0313151
gi|472583371	RHTO_02176	40S ribosomal protein s15	5	5	3	5	5	3	1.8664	2.2251	2.0713	2.0681	2.3466	1.7795	0.490547	0.0681745
gi|472583505	RHTO_02009	60S ribosomal protein l30	9	6	9	9	6	9	1.8615	2.3107	2.4491	2.5702	3.0086	2.453	0.376373	0.0392161
gi|472583563	RHTO_02067	40S ribosomal protein s4	21	25	28	19	23	26	3.0101	3.219	3.4739	4.1949	3.3458	2.9433	0.292341	0.0510006
gi|472583612	RHTO_02116	60S ribosomal protein l37	2	2	2	2	2	2	0.7259	2.2575	2.5235	0.99104	2.5477	2.3497	0.609046	0.3468
gi|472583669	RHTO_01759	50S ribosomal subunit l30	9	7	8	9	7	8	2.4308	2.2338	2.0339	2.8951	2.3591	1.7658	0.445206	0.111984
gi|472583715	RHTO_01805	60S ribosomal protein l3	5	5	5	1	0	2	2.0313	NaN	1.5077	2.6018	NaN	1.4263	0.542732	0.223987
gi|472583783	RHTO_01873	60S ribosomal protein l5	22	22	21	22	22	21	2.2442	1.8969	2.1974	2.7572	2.0829	1.8879	0.457492	0.0857658
gi|472583843	RHTO_01933	60S ribosomal protein l39	1	1	1	1	1	1	1.1916	2.1105	2.9837	1.4666	2.0698	2.4985	0.521743	0.144719
gi|472584114	RHTO_01367	37S ribosomal protein s24	7	5	5	7	5	5	1.3503	1.6505	3.1791	1.7177	1.8222	2.6168	0.504369	0.107156
gi|472584431	RHTO_01240	50S ribosomal protein l13	4	4	3	4	4	3	1.2503	1.8002	1.9215	1.6347	2.0276	1.6399	0.571573	0.0678856
gi|472584676	RHTO_01016	40S ribosomal protein s28	6	6	6	6	6	6	5.145	8.8947	5.8361	6.42	9.2064	5.1379	0.153005	0.0430723
gi|472584677	RHTO_01017	40S ribosomal protein s5	10	9	12	10	9	12	1.7906	2.2497	2.6361	2.1664	2.7089	2.323	0.420409	0.0470362
gi|472584732	RHTO_01072	30S ribosomal protein s12	1	1	2	1	1	2	1.3722	2.7153	1.7174	1.7325	3.2236	1.5641	0.508919	0.174868
gi|472585035	RHTO_07954	60S ribosomal protein l3	31	28	27	1	1	1	1.7361	2.163	1.8005	2.1518	2.1712	1.4396	0.53998	0.133954
gi|472585231	RHTO_08150	40S ribosomal protein s8	14	15	12	14	15	12	1.2714	3.8516	2.2333	1.6362	4.2143	1.8756	0.460541	0.197238
gi|472585232	RHTO_08151	40S ribosomal protein s29	3	3	4	3	3	4	1.409	2.6244	1.3765	1.8042	2.7823	1.3394	0.553427	0.193595
gi|472585347	RHTO_07771	60S ribosomal protein l12	6	6	8	6	6	8	1.6569	1.7628	2.4277	2.0935	2.2083	1.9899	0.477681	0.0248504
gi|472585443	RHTO_07868	60S ribosomal protein l2	21	22	23	21	22	23	1.8223	2.6127	2.1141	2.3889	3.1675	1.9753	0.41352	0.0953745
gi|472585461	RHTO_07886	60S ribosomal protein l23a	12	7	7	12	7	7	1.7351	2.5049	1.9134	2.1318	2.8933	1.8034	0.456407	0.105017
gi|472585486	RHTO_07911	40S ribosomal protein s20	5	7	6	5	7	6	1.9396	2.4796	2.696	2.7938	2.8288	2.9913	0.348582	0.0125626
gi|472586098	RHTO_07374	30S ribosomal protein s13	0	2	3	0	2	3	NaN	1.3359	1.7516	NaN	1.5032	1.5876	0.647565	0.0250075
gi|472586197	RHTO_06784	40S ribosomal protein s7	2	1	1	2	1	1	0.96137	0.99485	1.2705	1.2542	1.21	1.2422	0.809597	0.0150917
gi|472586205	RHTO_06792	60S ribosomal protein l35	6	7	6	6	7	6	2.8344	2.3284	4.023	3.8219	2.2026	2.8762	0.354447	0.0963578
gi|472586228	RHTO_06815	40S ribosomal protein s1	14	17	16	14	17	16	1.9453	2.6542	3.5072	2.6843	3.0963	2.6641	0.356955	0.0294688
gi|472586407	RHTO_06994	40S ribosomal protein s21	2	3	2	2	3	2	1.3247	2.0459	1.6764	1.8017	2.3864	1.7585	0.514246	0.0827314
gi|472586487	RHTO_06010	40S ribosomal protein s23	5	3	3	5	3	3	1.9618	1.5042	1.8683	2.3431	1.9331	1.7496	0.505216	0.0731401
gi|472586643	RHTO_06166	40S ribosomal protein s0	6	8	10	6	8	9	2.0827	2.4528	2.2455	2.9785	3.0748	2.2287	0.369885	0.0684509
gi|472586667	RHTO_06190	60S ribosomal protein l27	7	8	8	7	8	8	1.8656	1.7663	2.5787	2.7392	2.2902	2.26	0.41473	0.0431059
gi|472586705	RHTO_06228	30S ribosomal protein s9	9	7	8	6	4	4	2.0558	1.9554	1.9482	2.5428	2.0986	1.7148	0.484311	0.0951857
gi|472586725	RHTO_06248	40S ribosomal protein s22	8	9	11	8	9	11	1.7615	2.039	2.9219	2.4238	1.996	2.8043	0.423391	0.0728084
gi|472586726	RHTO_06249	40S ribosomal protein s17	12	16	13	12	15	13	1.907	2.3508	2.3197	2.2132	2.9547	1.9267	0.436433	0.091269
gi|472586819	RHTO_06342	54S ribosomal protein l16	6	7	6	6	7	6	1.3632	1.336	1.4541	1.9152	1.3904	1.38	0.655331	0.11538
gi|472586915	RHTO_04592	60S ribosomal protein l33	6	7	9	6	7	9	7.3822	1.1108	2.7115	9.3005	1.5446	2.7124	0.374538	0.269996
gi|472587031	RHTO_04709	37S ribosomal protein	4	4	4	3	4	4	1.2867	1.7721	1.8351	1.5262	2.0678	1.8297	0.561789	0.0868187
gi|472587062	RHTO_04740	40S ribosomal protein s18	11	14	8	11	14	8	1.5265	2.3201	3.152	2.1268	2.4889	2.9255	0.404599	0.0642303
gi|472587138	RHTO_04816	60S ribosomal protein l19	10	9	11	10	9	11	1.5057	2.6564	1.8134	2.0494	2.7416	1.4455	0.514833	0.165175
gi|472587161	RHTO_04839	60S ribosomal protein l15	11	10	10	11	10	10	3.0638	2.1612	3.4085	4.0312	2.4106	3.0217	0.33128	0.0833852
gi|472587211	RHTO_04890	40S ribosomal protein s7	10	12	12	10	12	12	1.5314	1.8413	2.0858	2.0809	2.3275	2.0078	0.469421	0.0355404
gi|472587332	RHTO_05011	40S ribosomal protein s3	14	21	22	14	21	22	2.1579	2.9156	4.5269	2.7993	3.3447	4.2879	0.296476	0.0620468
gi|472587356	RHTO_05035	60S ribosomal protein l43	1	1	2	1	1	2	9.707	6.0813	5.3732	13.576	6.8395	4.7225	0.143874	0.0690761
gi|472587424	RHTO_05103	60S ribosomal protein l32	10	8	8	10	8	8	1.4268	2.146	1.7184	1.9785	2.3727	1.527	0.527258	0.11823
gi|472587440	RHTO_05119	60S ribosomal protein l13	16	18	15	16	18	15	2.6216	4.6127	3.081	3.443	5.3143	2.0832	0.319549	0.14809
gi|472587467	RHTO_02689	37S ribosomal protein mrp17	3	2	5	3	2	5	1.3032	1.2773	1.59	1.678	1.4276	1.4773	0.657778	0.0548279
gi|472587522	RHTO_02744	50S ribosomal protein l3	8	9	9	8	9	9	1.5136	2.1819	1.8998	2.0094	2.3061	1.6765	0.509258	0.0820412
gi|472587528	RHTO_02750	60S acidic ribosomal protein p1	1	1	1	1	1	1	0.18672	0.7233	0.68082	0.27933	0.96636	0.66071	2.04278	1.35262
gi|472587857	RHTO_03081	40S ribosomal protein s30	3	2	2	3	2	2	0.90481	1.5483	1.4984	1.2795	1.4399	1.309	0.746663	0.0460314
gi|472587889	RHTO_03113	60S ribosomal protein l16	12	14	16	12	14	16	1.8409	4.2651	2.4241	2.6136	4.5566	2.0161	0.366028	0.139017
gi|472587901	RHTO_03125	37S ribosomal protein	1	4	5	1	4	5	1.6753	2.5796	1.2292	2.185	2.907	1.1359	0.560674	0.282629
gi|472587936	RHTO_03161	60S ribosomal protein l22	10	11	12	10	11	12	2.2765	2.073	2.8907	2.7524	2.1476	2.641	0.402533	0.0551832
gi|472588330	RHTO_00230	50S ribosomal protein l27	3	3	3	3	3	3	1.469	1.5779	2.4132	1.9294	1.7704	2.0512	0.523553	0.0389295
gi|472588454	RHTO_00354	40S ribosomal protein s10	10	9	10	10	9	10	1.6798	2.1389	2.236	2.3093	2.1635	1.8072	0.482863	0.0627569
gi|472588510	RHTO_00410	50S ribosomal protein l15	6	8	5	4	5	3	2.1965	2.6425	2.6507	3.1646	3.0558	2.6637	0.339553	0.0315648
gi|472588569	RHTO_00469	60S ribosomal protein l34	7	6	4	7	6	4	1.7917	2.4297	2.8709	2.5124	2.889	2.5715	0.377681	0.0276955
gi|472581456	RHTO_05137	mitochondrial small subunit ribosomal protein S5e	1	4	2	1	4	2	1.7989	1.7897	1.5467	2.4141	2.003	1.2818	0.564546	0.191499
gi|472581560	RHTO_04480	mitochondrial small subunit ribosomal protein S8	1	2	4	1	0	2	1.3297	NaN	2.083	1.6675	NaN	1.9678	0.553941	0.0647133
gi|472587995	RHTO_03220	mitochondrial ribosomal small-subunit protein Mrp51	9	7	5	9	7	5	1.2212	1.6324	1.4767	1.5376	1.5435	1.304	0.688371	0.0679943
gi|472587091	RHTO_04769	mitochondrial large subunit ribosomal protein L23	9	7	8	9	7	8	2.0547	3.5389	3.1161	2.7678	3.7972	2.8493	0.325204	0.0538144
gi|472587225	RHTO_04904	large subunit ribosomal protein L4	3	5	5	3	5	5	2.5917	3.0713	3.0777	3.6506	4.1221	3.1311	0.278633	0.0386066
gi|472587043	RHTO_04721	small subunit ribosomal protein S2	7	7	5	7	7	5	1.5574	2.0489	3.4936	1.8757	2.2954	3.5664	0.416394	0.127466
gi|472586916	RHTO_04593	large subunit ribosomal protein L31e	8	6	8	8	6	8	1.6157	2.1688	2.0989	2.2468	2.6103	2.0732	0.43684	0.0501343
gi|472586380	RHTO_06967	mitochondrial large subunit ribosomal protein L11	4	5	3	1	1	1	1.7668	1.758	2.0655	2.3274	2.0255	1.9775	0.476353	0.0408752
gi|472587247	RHTO_04926	mitochondrial ribosomal protein subunit Rsm25	8	9	11	8	9	11	1.514	1.6353	1.7715	2.0218	1.6658	1.3619	0.60973	0.120107
gi|472588216	RHTO_00116	mitochondrial large subunit ribosomal protein L23	6	12	8	6	12	8	1.6355	4.358	3.0139	2.0732	4.6013	2.6024	0.361312	0.13399
gi|472587699	RHTO_02923	mitochondrial ribosomal protein subunit S27	1	1	2	1	1	2	1.3705	2.1451	1.076	1.7714	2.2698	0.97023	0.678592	0.311155
gi|472585747	RHTO_07640	mitochondrial large subunit ribosomal protein L4	6	5	7	1	1	1	3.1467	3.6557	3.0346	3.8532	4.0171	2.5298	0.30125	0.0816118
gi|472585881	RHTO_07157	large subunit ribosomal protein L24e	2	1	1	2	1	1	1.8646	1.7322	1.5646	2.5564	1.9868	1.479	0.523543	0.143551
gi|472585901	RHTO_07177	mitochondrial ribosomal protein subunit img2	3	3	4	3	3	4	1.3633	1.8086	1.8668	1.9526	1.8948	1.7287	0.539456	0.034678
gi|472582228	RHTO_03968	large subunit ribosomal protein L7Ae	21	20	22	21	20	22	2.5446	2.1351	2.6447	3.5694	2.3231	2.1075	0.395038	0.101895
gi|472582502	RHTO_03722	mitochondrial 40S ribosomal protein MRP2	2	3	2	2	3	2	2.062	1.3699	0.72177	2.5846	1.5515	0.66078	0.848269	0.590217
gi|472582516	RHTO_03736	mitochondrial small subunit ribosomal protein S19	2	1	2	2	1	2	0.81168	1.235	1.1718	1.0684	1.2046	1.0551	0.904636	0.0647749
gi|472585332	RHTO_07756	large subunit ribosomal protein L17e	7	6	8	7	6	8	1.8637	1.8226	2.4157	2.3741	1.901	2.1657	0.469665	0.0528603
gi|472582476	RHTO_03696	small subunit ribosomal protein S16	5	2	2	5	2	2	1.493	1.479	1.2656	1.9509	1.9264	1.2742	0.605498	0.15532
gi|472583104	RHTO_02373	large subunit ribosomal protein L14e	13	14	15	13	14	15	1.8318	2.1204	2.1675	2.4898	2.4521	1.9077	0.444548	0.0690424
gi|472584458	RHTO_01267	mitochondrial ribosomal protein subunit L51	5	6	7	5	6	7	1.594	2.9625	2.0338	2.0383	2.9885	1.7717	0.463217	0.117329
gi|472583824	RHTO_01914	large subunit ribosomal protein L14	1	3	2	1	3	2	1.2847	2.9774	3.3712	1.6285	3.1257	3.1756	0.416297	0.171288
gi|472584904	RHTO_00758	mitochondrial large subunit ribosomal protein L49	2	2	2	2	2	2	1.2587	1.807	1.1746	1.5488	2.3501	1.1352	0.650692	0.227736
gi|472584993	RHTO_00847	mitochondrial large subunit ribosomal protein L45	3	0	0	3	0	0	1.3793	NaN	NaN	2.1182	NaN	NaN	#VALUE!	#VALUE!
gi|472585968	RHTO_07244	mitochondrial small subunit ribosomal protein S28	2	2	4	2	2	4	1.5252	1.6991	1.8846	2.0659	1.7828	1.6007	0.556564	0.0704389
gi|472583584	RHTO_02088	mitochondrial large ribosomal subunit YmL35	8	6	7	6	5	7	1.4936	1.7318	1.8701	1.8051	1.8674	1.8509	0.543256	0.00959418
gi|472588225	RHTO_00125	small subunit ribosomal protein S17	6	8	7	3	3	3	1.6845	2.4986	2.5361	1.9704	1.9373	2.1042	0.499644	0.021575
Kinase
gi|472583942	RHTO_01618	eukaryotic translation initiation factor 2-alpha kinase	3	3	4	3	3	4	0.70946	0.75687	1.3876	0.93117	0.85195	1.4735	0.975451	0.261836
gi|472580365	RHTO_06620	[3-methyl-2-oxobutanoate dehydrogenase (acetyl-transferring)] kinase	1	0	2	1	0	2	0.60993	NaN	1.102	0.78132	NaN	1.0742	1.10541	0.246752
gi|472582231	RHTO_03971	1-phosphatidylinositol 4-kinase	1	2	1	1	2	1	0.47695	0.7548	0.57157	0.56703	0.90827	0.54731	1.5639	0.402142
gi|472587595	RHTO_02818	6-phosphofructo-2-kinase / fructose-2,6-bisphosphatase	4	5	6	4	4	5	0.51777	0.58441	0.73157	0.63496	0.76779	0.80935	1.37097	0.179751
gi|472588156	RHTO_00056	6-phosphofructo-2-kinase / fructose-2,6-bisphosphatase	9	11	8	9	10	7	0.89613	0.92444	0.99586	1.1207	1.0447	0.92	0.978823	0.0991115
gi|472588594	RHTO_00494	6-phosphofructokinase	29	33	28	2	5	4	0.6672	0.73465	1.0447	0.87182	0.82277	0.9299	1.14594	0.0700173
gi|472581737	RHTO_04461	acetate kinase	7	9	11	1	1	3	0.5494	0.59405	0.96077	0.70193	0.592	0.88496	1.41461	0.279732
gi|472580745	RHTO_05920	adenosine kinase	8	11	9	0	1	0	NaN	0.67342	NaN	NaN	0.7398	NaN	#VALUE!	#VALUE!
gi|472587527	RHTO_02749	adenylate kinase	6	4	4	6	4	4	0.57572	0.73773	0.95444	0.73621	0.69559	0.75374	1.37422	0.0571416
gi|472587893	RHTO_03117	adenylate kinase	21	19	19	0	1	2	0.69362	0.80579	1.0562	0.93439	0.91141	1.0066	1.05362	0.0538331
gi|472583575	RHTO_02079	adenylylsulfate kinase	11	9	8	11	9	8	0.8922	1.3614	1.6107	1.1525	1.5385	1.3038	0.761551	0.108949
gi|472584965	RHTO_00819	AGC/Akt protein kinase	4	6	5	4	6	5	0.6084	0.73761	1.3042	0.84054	0.79729	1.2634	1.07849	0.250615
gi|472586446	RHTO_07033	AGC/Akt protein kinase	7	7	7	1	2	2	0.74404	0.72527	0.85446	1.0436	0.80165	0.84241	1.13091	0.152564
gi|472582153	RHTO_03892	AGC/NDR protein kinase	9	8	7	9	8	7	0.55254	0.89646	0.81601	0.65912	0.8778	0.74795	1.33112	0.18905
gi|472588587	RHTO_00487	AGC/YANK protein kinase	2	1	3	2	1	3	0.76872	5.4042	0.69963	0.93259	5.8765	0.66097	0.91846	0.684468
gi|472580749	RHTO_05924	AMP-activated protein kinase beta subunit, carbohydrate-Binding Module Family 48 protein, glycogen-binding	1	0	1	1	0	1	0.6144	NaN	NaN	0.75182	NaN	NaN	#VALUE!	#VALUE!
gi|472585178	RHTO_08097	aspartate kinase	9	10	13	9	10	13	1.6226	1.815	2.0197	2.078	2.3663	1.8986	0.476846	0.05219
gi|472583751	RHTO_01841	calcium calmodulin-dependent protein kinase	7	6	6	7	6	6	0.39954	0.74651	0.70756	0.51022	0.84429	0.57893	1.6239	0.397967
gi|472584135	RHTO_01388	calcium calmodulin-dependent protein kinase	4	5	4	4	5	4	0.84833	0.56694	0.67868	1.0287	0.56032	0.56307	1.51092	0.466655
gi|472586733	RHTO_06256	calcium calmodulin-dependent protein kinase	1	1	1	1	1	1	NaN	0.3838	0.69206	NaN	0.44127	0.52152	2.09183	0.246578
gi|472588318	RHTO_00218	calcium/calmodulin-dependent protein kinase kinase	2	1	3	2	1	3	1.2942	1.0972	0.5226	1.4802	1.3008	0.53869	1.10023	0.656477
gi|472588357	RHTO_00257	calcium/calmodulin-dependent protein kinase kinase	3	4	4	1	0	0	0.48053	0.69084	0.81693	0.65384	0.75324	0.8442	1.34719	0.173269
gi|472582993	RHTO_02603	cAMP-dependent protein kinase catalytic subunit	6	5	3	6	5	3	0.37075	0.65922	0.71479	0.47463	0.70813	0.68625	1.65876	0.38876
gi|472583132	RHTO_02402	cAMP-dependent protein kinase regulatory subunit	12	16	16	3	4	4	0.50129	0.57541	0.76919	0.62837	0.65375	0.70026	1.51637	0.0824936
gi|472580969	RHTO_05660	carbohydrate kinase-related domain protein	2	3	1	2	3	1	0.22346	0.16073	0.32953	0.28888	0.20361	0.32734	3.80931	0.975822
gi|472581574	RHTO_04494	carbon catabolite-derepressing protein kinase	6	7	8	6	7	8	0.77745	0.80117	1.1834	1.0788	1.1248	1.2606	0.869759	0.0688971
gi|472582601	RHTO_03515	casein kinase 1	8	14	9	8	14	9	0.96108	1.0811	1.2343	1.2508	1.198	1.1274	0.840403	0.0440297
gi|472587842	RHTO_03066	casein kinase 1	6	5	4	6	5	4	0.80877	1.023	0.99869	1.1082	1.1381	1.0095	0.92387	0.0589837
gi|472580546	RHTO_06481	casein kinase II subunit alpha	10	7	11	10	7	11	1.0613	1.033	1.3033	1.2935	1.111	1.1564	0.84598	0.0655452
gi|472585359	RHTO_07783	casein kinase II subunit beta	2	1	1	2	1	1	0.75175	2.1353	2.6323	0.98461	2.3634	2.2876	0.625296	0.338112
gi|472588537	RHTO_00437	casein kinase II subunit beta	3	2	2	3	2	2	0.56984	0.74965	1.9593	0.79996	0.8406	1.5733	1.0251	0.338661
gi|472581879	RHTO_04369	checkpoint serine/threonine-protein kinase	1	1	1	1	1	1	1.0942	NaN	1.6533	1.5953	NaN	1.6558	0.61539	0.0161953
gi|472581376	RHTO_05278	choline kinase	4	5	6	4	5	6	0.47636	1.4809	1.1288	0.57076	1.7192	1.0192	1.10496	0.594932
gi|472585734	RHTO_07627	classical protein kinase C	9	11	11	9	11	11	0.77454	0.82969	0.95556	1.0486	0.963	0.90065	1.03413	0.0784166
gi|472583440	RHTO_01943	C-terminal domain kinase, subunit gamma, CTK3	0	1	0	0	1	0	NaN	4.8537	NaN	NaN	5.4874	NaN	#VALUE!	#VALUE!
gi|472587947	RHTO_03172	cyclin-dependent kinase regulatory subunit	1	1	2	1	1	2	0.56725	0.86395	0.9934	0.77135	0.89666	0.91144	1.16961	0.110196
gi|472585391	RHTO_07815	cyclin-dependent protein kinase	2	0	0	2	0	0	1.1691	NaN	NaN	1.5592	NaN	NaN	#VALUE!	#VALUE!
gi|472585597	RHTO_07490	cyclin-dependent protein kinase	1	1	0	1	1	0	1.1758	1.2535	NaN	1.4291	1.181	NaN	0.773241	0.103944
gi|472581813	RHTO_04302	dephospho-CoA kinase	5	4	5	5	4	5	0.45085	0.51804	0.78885	0.60524	0.63449	0.72759	1.53424	0.143565
gi|472586383	RHTO_06970	diacylglycerol kinase	1	0	0	1	0	0	0.56325	NaN	NaN	0.64051	NaN	NaN	#VALUE!	#VALUE!
gi|472584602	RHTO_00942	dihydroneopterin aldolase / 2-amino-4-hydroxy-6-hydroxymethyldihydropteridine diphosphokinase / dihydropteroate synthase	4	5	6	2	3	3	0.94016	1.1261	1.2992	1.1615	1.1902	1.2588	0.831853	0.0340494
gi|472588257	RHTO_00157	dual-specificity kinase	3	4	3	1	1	1	0.64405	0.76417	0.74015	0.78644	0.91297	0.7944	1.20856	0.0982731
gi|472583942	RHTO_01618	eukaryotic translation initiation factor 2-alpha kinase	3	3	4	3	3	4	0.70946	0.75687	1.3876	0.93117	0.85195	1.4735	0.975451	0.261836
gi|472580789	RHTO_05814	extracellular signal-regulated kinase 1/2	2	3	5	1	3	4	0.51094	1.1083	1.5832	0.63631	1.1456	1.6335	1.01888	0.496069
gi|472580867	RHTO_05737	galactokinase	7	9	8	1	2	1	0.77589	0.98836	1.3898	1.056	0.98228	1.4346	0.887356	0.16859
gi|472583051	RHTO_02661	gluconokinase	2	3	3	2	3	3	0.61279	0.99014	1.4701	0.84243	1.2394	1.6089	0.871809	0.288293
gi|472587588	RHTO_02811	glutamate 5-kinase	1	2	3	1	2	3	1.021	1.9366	1.4636	1.3117	2.2359	1.2833	0.662953	0.186997
gi|472585756	RHTO_07649	glycerol kinase	3	1	2	3	1	2	0.63938	0.76243	0.85831	0.83321	0.90512	0.88462	1.14514	0.0493497
gi|472586991	RHTO_04669	glycerone kinase	0	1	2	0	1	2	NaN	1.3696	1.9255	NaN	1.7439	2.0142	0.534951	0.0544135
gi|472586288	RHTO_06875	glycogen synthase kinase 3 beta	10	14	15	10	14	15	0.59247	0.78307	1.0263	0.77599	0.99645	0.93751	1.11963	0.149758
gi|472584905	RHTO_00759	guanylate kinase	9	12	14	9	12	14	1.0583	1.0284	1.4433	1.2096	1.4581	1.4149	0.739769	0.0760257
gi|472586283	RHTO_06870	hexokinase	20	22	19	20	22	19	0.72355	0.67556	0.9794	0.88543	0.73775	0.90402	1.19701	0.137721
gi|472586549	RHTO_06072	hexokinase	18	15	18	18	15	18	0.94145	0.79716	1.1433	1.2198	0.91066	1.1545	0.928029	0.149103
gi|472580747	RHTO_05922	histidine kinase	1	0	1	1	0	1	1.2239	NaN	2.5484	1.4965	NaN	2.5153	0.532896	0.191385
gi|472583288	RHTO_02231	histidine kinase	2	4	4	2	4	4	0.90344	1.3173	1.2635	1.1588	1.8721	1.3739	0.708325	0.165269
gi|472585472	RHTO_07897	histidine kinase	1	5	5	1	5	5	0.79323	1.1052	1.1369	1.0333	1.1744	1.1442	0.897748	0.0616757
gi|472583509	RHTO_02013	homoserine kinase	6	3	3	6	3	3	0.29747	0.32413	0.5228	0.43116	0.41052	0.51848	2.22799	0.265658
gi|472582320	RHTO_03810	hydroxymethylpyrimidine/phosphomethylpyrimidine kinase	2	4	4	2	4	4	0.44114	0.62187	0.56139	0.57529	0.68064	0.55304	1.67188	0.178972
gi|472586212	RHTO_06799	inositol hexakisphosphate and diphosphoinositol-pentakisphosphate kinase	11	14	13	11	14	13	0.59169	0.59982	0.84364	0.769	0.68147	0.74831	1.36805	0.087911
gi|472582208	RHTO_03948	inositol-hexakisphosphate kinase	2	4	2	2	4	2	0.27873	0.4577	0.35821	0.35783	0.45205	0.34656	2.63076	0.365366
gi|472586761	RHTO_06284	inositol-polyphosphate multikinase	2	0	0	2	0	0	0.61719	NaN	NaN	0.85179	NaN	NaN	#VALUE!	#VALUE!
gi|472580922	RHTO_05792	Kinase binding protein CGI-121	0	1	3	0	1	3	NaN	2.5025	1.3229	NaN	2.6613	1.1926	0.60713	0.327212
gi|472588370	RHTO_00270	kinase-related protein	3	3	5	3	3	5	0.31296	0.24282	0.28245	0.40425	0.26753	0.25005	3.40361	0.815836
gi|472584037	RHTO_01713	L-arabinokinase	1	4	4	1	4	4	1.0531	0.86866	1.4933	1.2952	1.0477	1.461	0.803672	0.137749
gi|472583105	RHTO_02374	mitogen-activated protein kinase 7	9	10	8	8	10	7	0.56973	1.1045	0.9106	0.73217	1.185	0.83384	1.13632	0.266595
gi|472583083	RHTO_02351	mitogen-activated protein kinase kinase	3	4	3	1	2	1	0.5069	0.50848	0.68808	0.60898	0.52596	0.72719	1.63951	0.263074
gi|472585702	RHTO_07595	mitogen-activated protein kinase kinase 1	1	2	3	1	2	3	0.76037	0.8099	1.0176	0.9883	0.98072	0.97076	1.02054	0.00917285
gi|472586021	RHTO_07297	mitogen-activated protein kinase kinase kinase	1	0	0	1	0	0	0.42066	NaN	NaN	0.50172	NaN	NaN	#VALUE!	#VALUE!
gi|472587655	RHTO_02879	mitogen-activated protein kinase kinase kinase 13	1	1	0	1	1	0	0.5598	1.8967	NaN	0.80657	2.425	NaN	0.826095	0.585093
gi|472588447	RHTO_00347	mitogen-activated protein kinase Maf1	1	1	1	1	1	1	0.2365	0.71315	0.31341	0.29	0.82402	0.27834	2.75152	1.33387
gi|472583914	RHTO_01590	multi-sensor hybrid histidine kinase	0	3	2	0	3	2	NaN	0.69086	0.80757	NaN	0.86713	0.78718	1.21179	0.0828219
gi|472584139	RHTO_01392	N-acetyl-gamma-glutamyl-phosphate reductase / acetylglutamate kinase	31	35	37	31	35	37	0.9239	1.3428	1.4997	1.2489	1.5802	1.349	0.724942	0.0851223
gi|472586360	RHTO_06947	NAD+ kinase	0	2	1	0	2	1	NaN	0.28628	NaN	NaN	0.33388	NaN	#VALUE!	#VALUE!
gi|472584399	RHTO_01208	negative regulator of the PHO system, protein serine/threonine kinase	14	10	10	13	9	10	0.40048	0.6433	0.71787	0.51469	0.72335	0.55578	1.70822	0.291114
gi|472585093	RHTO_08012	nicotinamide riboside kinase	1	2	2	1	2	2	0.89398	1.387	1.7075	1.2752	1.445	1.509	0.712974	0.0633972
gi|472588067	RHTO_03292	nucleoside-diphosphate kinase	5	7	6	5	7	6	0.54392	0.71561	1.0106	0.73797	0.82861	0.86783	1.23807	0.10493
gi|472588517	RHTO_00417	nucleoside-diphosphate kinase	1	1	1	1	1	1	0.77599	1.1417	3.0245	0.94477	1.2481	2.7592	0.7407	0.351942
gi|472581963	RHTO_04206	p21-activated kinase 1	5	8	4	1	1	1	0.50845	0.59988	0.73263	0.63053	0.78043	0.76033	1.39418	0.166957
gi|472582512	RHTO_03732	p21-activated protein kinase	3	5	5	3	5	5	0.45541	0.91376	0.66227	0.55155	0.91078	0.5641	1.56126	0.401733
gi|472582731	RHTO_03321	p38 MAP kinase	8	8	8	6	7	5	0.64108	0.53035	1.6227	0.78762	0.70016	1.4804	1.12446	0.396822
gi|472587557	RHTO_02780	phosphatidylinositol 4-kinase	6	9	5	6	9	5	0.43896	0.73554	0.56697	0.48569	0.80925	0.48992	1.7786	0.470235
gi|472585587	RHTO_07480	phosphoenolpyruvate carboxykinase (ATP)	10	9	10	3	4	4	0.58821	0.77588	0.95237	0.76647	0.90883	1.0218	1.12789	0.164748
gi|472588133	RHTO_00033	phosphoglycerate kinase	28	31	30	28	31	30	0.57427	0.63157	0.90873	0.74905	0.77595	0.87545	1.25535	0.100624
gi|472583569	RHTO_02073	phosphomevalonate kinase	7	5	4	7	5	4	0.79728	1.1959	0.93986	1.0084	1.3467	0.88322	0.955482	0.197337
gi|472580554	RHTO_06489	phosphopantetheine adenylyltransferase / dephospho-CoA kinase	1	2	1	1	2	1	0.4678	0.65118	0.63671	0.59793	0.76149	0.6444	1.51249	0.182813
gi|472586790	RHTO_06313	protein kinase Yak1	3	1	2	3	1	2	0.49494	0.58556	0.63864	0.62459	0.62023	0.61718	1.61121	0.00965801
gi|472584610	RHTO_00950	protein of carbohydrate kinase, FGGY type family	5	7	8	5	7	8	0.48292	0.52905	0.72978	0.68534	0.65823	0.71369	1.45984	0.0590318
gi|472580497	RHTO_06518	protein serine/threonine kinase	1	2	1	1	2	1	0.97592	1.2875	0.88022	1.2464	1.6105	0.96237	0.820779	0.209699
gi|472580941	RHTO_05632	protein serine/threonine kinase	2	6	2	2	6	2	0.26129	0.51583	0.6477	0.32605	0.59783	0.62993	2.10907	0.830698
gi|472585395	RHTO_07819	protein serine/threonine kinase	1	1	1	1	1	1	NaN	0.42765	0.37778	NaN	0.46457	0.3763	2.40499	0.357037
gi|472585595	RHTO_07488	protein serine/threonine kinase	1	2	3	1	2	3	1.0325	1.1655	0.88684	1.1449	1.3554	1	0.870409	0.131131
gi|472581452	RHTO_05133	protein serine/threonine kinase,ataxia telangectasia mutated family protein	1	0	2	1	0	2	0.542	NaN	0.77714	0.61996	NaN	0.72711	1.49416	0.168079
gi|472586253	RHTO_06840	protein-histidine kinase	2	4	4	2	4	4	0.65798	0.63195	0.67863	0.88979	0.68574	0.63704	1.38397	0.232052
gi|472586596	RHTO_06118	PTK9 protein tyrosine kinase 9	2	1	3	2	1	3	1.1029	0.67856	1.2165	1.4206	0.79899	1.2456	0.919445	0.291857
gi|472585065	RHTO_07984	pyridoxine kinase	4	2	4	4	2	4	0.97674	0.92694	1.1611	1.3903	1.1097	1.2248	0.812291	0.0910092
gi|472583293	RHTO_02159	pyruvate dehydrogenase kinase	3	5	6	3	5	6	0.39851	0.67481	0.67786	0.59102	0.80372	0.60269	1.53181	0.249604
gi|472583470	RHTO_01973	pyruvate dehydrogenase kinase	2	1	1	2	1	1	2.1047	2.4241	2.5736	2.522	2.7264	2.6521	0.380118	0.0150975
gi|472583934	RHTO_01610	pyruvate kinase	29	35	32	29	35	32	0.62687	0.61544	0.92698	0.8119	0.73855	0.86449	1.24748	0.0995711
gi|472584067	RHTO_01320	riboflavin kinase	2	2	2	1	1	1	0.81982	1.2975	1.4139	1.0077	1.3758	1.3419	0.821474	0.148276
gi|472585614	RHTO_07507	ribokinase	2	1	3	2	1	3	0.86939	1.262	1.1879	1.1865	1.4509	1.193	0.790088	0.0873784
gi|472581838	RHTO_04328	ribose-phosphate pyrophosphokinase	8	6	9	8	6	9	0.62674	0.85723	1.0504	0.89739	1.0429	1.0076	1.02189	0.0818107
gi|472582981	RHTO_02591	ribose-phosphate pyrophosphokinase	9	9	8	9	9	8	0.59729	0.85201	1.0597	0.84539	1.0702	1.0259	1.03068	0.133348
gi|472585330	RHTO_07754	RIO kinase 1	0	1	1	0	1	1	NaN	1.3645	1.5686	NaN	1.6964	1.4978	0.628565	0.0552691
gi|472588596	RHTO_00496	RIO kinase 2	1	2	2	1	2	2	0.93567	0.94566	0.92541	1.2164	1.2721	0.93286	0.893391	0.1557
gi|472587593	RHTO_02816	SCY1-like protein kinase	1	2	1	1	2	1	0.4421	0.78702	0.29005	0.66396	0.82079	0.23597	2.32076	1.66645
gi|472584556	RHTO_00896	sensor histidine kinase/response regulator	1	2	2	1	2	2	0.44567	0.5191	0.87059	0.57366	0.52984	0.88213	1.58806	0.400102
gi|472582575	RHTO_03489	ser/thr/tyr protein kinase RAD53	2	2	1	2	2	1	1.0592	1.1571	1.4748	1.3987	1.2629	1.7886	0.688625	0.118578
gi|472588215	RHTO_00115	serine/threonine kinase 25	3	1	1	3	1	1	0.61891	NaN	NaN	0.75361	NaN	NaN	#VALUE!	#VALUE!
gi|472583725	RHTO_01815	serine/threonine kinase family protein	0	1	1	0	1	1	NaN	0.70422	1.3391	NaN	0.81309	1.385	0.975949	0.359107
gi|472587933	RHTO_03157	serine/threonine kinase receptor associated protein	1	4	3	1	4	3	0.33768	1.156	1.8016	0.41959	1.2184	1.8522	1.24798	0.993179
gi|472580220	RHTO_07391	serine/threonine protein kinase	2	1	1	2	1	1	0.56342	0.56513	0.53617	0.76068	0.62631	0.54844	1.57821	0.254871
gi|472581603	RHTO_04523	serine/threonine protein kinase	0	2	3	0	2	3	NaN	0.25734	0.99602	NaN	0.34266	1.1223	1.90469	1.43353
gi|472585545	RHTO_07438	serine/threonine protein kinase	2	1	1	2	1	1	0.63817	0.48528	1.0308	0.87072	0.51417	1.0597	1.34567	0.528938
gi|472586978	RHTO_04656	serine/threonine protein kinase	6	5	7	1	2	1	0.39208	0.61879	0.81494	0.48948	0.70701	0.62541	1.68545	0.323092
gi|472585460	RHTO_07885	serine/threonine protein kinase FSK	2	4	4	1	1	1	0.41029	0.52811	0.73856	0.56957	0.67897	0.72219	1.53774	0.193848
gi|472582413	RHTO_03632	serine/threonine protein kinase Kin4	0	0	1	0	0	1	NaN	NaN	0.6878	NaN	NaN	0.74938	#VALUE!	#VALUE!
gi|472587462	RHTO_02684	serine/threonine protein kinase PRP4	0	1	0	0	1	0	NaN	0.55151	NaN	NaN	0.61015	NaN	#VALUE!	#VALUE!
gi|472587009	RHTO_04687	serine/threonine protein kinase RIM15	1	2	1	1	2	1	0.55977	1.1897	1.4963	0.69894	1.2887	1.5781	0.946796	0.425103
gi|472582278	RHTO_03768	serine/threonine-protein kinase	2	4	4	2	4	4	1.7871	0.70827	1.0217	2.3999	0.7456	0.91561	0.950018	0.47837
gi|472580940	RHTO_05631	serine/threonine-protein kinase HSL1,negative regulator of Swe1 kinase	1	1	1	1	1	1	0.52934	NaN	0.8421	0.66791	NaN	0.79859	1.37471	0.173242
gi|472585240	RHTO_08159	SFRS protein kinase	6	6	6	6	6	6	0.44895	0.61261	0.6226	0.62179	0.70847	0.64839	1.52068	0.100147
gi|472583682	RHTO_01772	shikimate kinase	0	1	0	0	1	0	NaN	0.83853	NaN	NaN	1.0724	NaN	#VALUE!	#VALUE!
gi|472588414	RHTO_00314	S-phase kinase-associated protein 1	10	16	12	10	16	12	0.16246	0.29389	0.46154	0.20819	0.29738	0.40416	3.54676	1.17538
gi|472586166	RHTO_06753	sphingosine kinase	1	0	2	0	0	1	0.62488	NaN	0.89216	0.92357	NaN	0.96908	1.05733	0.0359553
gi|472584522	RHTO_00862	thiamin pyrophosphokinase-related protein	3	2	3	3	2	3	1.0625	6.1489	1.847	1.328	6.7106	1.628	0.505427	0.316361
gi|472583435	RHTO_01938	thiamine pyrophosphokinase	2	3	3	2	3	3	0.46002	0.81662	0.69239	0.6317	0.78772	0.7582	1.39048	0.168577
gi|472581448	RHTO_05129	thiamine-phosphate diphosphorylase / hydroxyethylthiazole kinase	4	5	4	1	1	1	0.47542	0.50952	0.59214	0.61947	0.72254	0.6246	1.5331	0.129293
gi|472587651	RHTO_02875	thymidylate kinase	1	0	2	1	0	2	0.81536	NaN	1.9236	1.0076	NaN	1.8582	0.765306	0.32124
gi|472587386	RHTO_05065	TP53 regulating kinase	2	2	3	2	2	3	0.74623	0.81895	0.80928	0.91107	0.8527	0.71766	1.22126	0.153755
gi|472583857	RHTO_01533	two-component system, chemotaxis family, sensor kinase Cph1	1	2	4	1	2	4	0.23793	0.4035	0.59267	0.28507	0.42439	0.60238	2.50811	0.933218
gi|472583951	RHTO_01627	two-component system, OmpR family, sensor histidine kinase VicK	3	2	2	3	2	2	0.66242	0.68324	0.81279	0.78837	0.76728	0.85563	1.24682	0.0698431
gi|472582569	RHTO_03483	type II pantothenate kinase	2	0	2	2	0	2	1.9552	NaN	1.8738	2.5106	NaN	1.774	0.481005	0.116946
gi|472586693	RHTO_06216	UMP-CMP kinase	10	11	8	10	11	8	0.48134	0.58267	0.73702	0.59296	0.61316	0.68375	1.59329	0.116606
gi|472583492	RHTO_01996	uridine kinase	3	3	4	3	3	4	0.85754	1.6226	1.5855	1.1591	1.9209	1.5205	0.680335	0.172196
gi|472585470	RHTO_07895	uridine/cytidine kinase	2	1	2	2	1	2	0.25341	0.31073	0.44639	0.31846	0.33508	0.42358	2.82843	0.412378
Other proteins
gi|472581474	RHTO_05155	vacuolar amino acid transporter 1	1	1	0	1	1	0	0.48373	2.0754	NaN	0.54402	2.03	NaN	1.16539	0.951452
gi|472582287	RHTO_03777	vacuolar amino acid transporter 4	2	1	0	2	1	0	0.59326	0.58688	NaN	0.77559	0.71077	NaN	1.34813	0.0831443
gi|472580807	RHTO_05832	FKBP12-rapamycin complex-associated protein	5	10	11	5	10	11	0.66825	0.74171	0.9377	0.8618	0.55433	1.0335	1.35947	0.420674
gi|472584698	RHTO_01038	WD repeat protein, regulatory associated protein of mTOR	1	4	3	1	4	3	0.63503	0.83761	0.99731	0.71395	0.9973	1.0693	1.11285	0.251523
gi|472587432	RHTO_05111	WD repeat protein, G protein beta subunit-like	1	2	1	1	2	1	0.52103	0.67859	NaN	0.70273	0.87405	NaN	1.28356	0.197228
gi|472582218	RHTO_03958	phosphate system cyclin PHO80	1	0	1	1	0	1	NaN	NaN	0.8127	NaN	1.4697	0.94452	0.765211	0.261646
gi|472582935	RHTO_02545	[acyl-carrier-protein] S-malonyltransferase	1	3	2	1	3	2	0.35936	0.99637	1.0254	0.43604	0.42015	0.46143	2.38019	0.213059
gi|472588651	RHTO_00551	1-(5-phosphoribosyl)-5-[(5-phosphoribosylamino)methylideneamino]imidazole-4-carboxamide isomerase	2	5	5	2	5	5	1.0678	0.82402	1.2988	1.1824	0.46186	0.48398	2.20503	0.162478
gi|472580982	RHTO_05673	1,2-dihydroxy-3-keto-5-methylthiopentene dioxygenase	6	10	8	6	10	8	0.95222	0.71331	1.1519	1.289	0.36821	0.64034	2.25513	0.611273
gi|472581378	RHTO_05280	1,3-beta-glucan synthase, glycosyltransferase family 48 protein	13	18	14	13	18	14	0.71674	0.87477	1.0124	0.87795	1.0086	0.99226	1.06058	0.105872
gi|472582167	RHTO_03906	116 kda u5 small nuclear ribonucleoprotein component	18	24	15	18	24	15	0.85256	1.1135	1.4893	1.1748	1.4211	NaN	0.790822	0.123237
gi|472582714	RHTO_03304	18S rRNA (adenine1779-N6/adenine1780-N6)-dimethyltransferase	1	2	2	1	2	2	1.6545	1.1729	1.3778	2.1735	3.3067	3.585	0.314927	0.0436098
gi|472586131	RHTO_06718	1-acylglycerol-3-phosphate acyltransferase	2	3	3	2	3	3	0.4637	0.48157	0.64441	0.58	1.0619	NaN	#VALUE!	#VALUE!
gi|472587624	RHTO_02847	1-alkyl-2-acetylglycerophosphocholine esterase	1	1	3	1	1	3	0.98025	1.3731	1.5908	1.1658	0.10282	0.13044	7.54724	2.24043
gi|472582109	RHTO_04103	1-aminocyclopropane-1-carboxylate synthase	5	7	4	5	7	4	1.842	1.8982	2.7638	2.2817	0.22788	0.14703	5.29408	1.31416
gi|472583475	RHTO_01978	1-aminocyclopropane-1-carboxylate synthase	2	4	4	2	4	4	0.89406	1.0962	0.20502	1.1378	0.098753	0.11104	6.87979	4.68629
gi|472587538	RHTO_02760	20S cyclosome subunit (BimA/Nuc2/Cdc27)	2	0	1	2	0	1	0.72152	NaN	1.1607	0.96545	0.74751	0.68161	1.39252	0.0669165
gi|472580731	RHTO_05906	20S pre-rrna processing of protein	1	6	2	1	4	2	0.74567	1.0097	0.71172	0.89946	1.3657	1.3597	0.69773	0.0625667
gi|472582577	RHTO_03491	20S proteasome subunit alpha 1	6	7	9	6	7	9	0.7621	1.9421	1.5554	0.98195	0.88937	1.1999	0.994034	0.147838
gi|472581615	RHTO_04535	20S proteasome subunit alpha 3	5	5	5	3	2	2	0.82118	1.329	1.4351	1.0522	0.94271	1.2097	1.00168	0.154226
gi|472583753	RHTO_01843	20S proteasome subunit alpha 4	8	14	10	8	14	10	1.3047	1.1924	1.202	1.6207	0.9295	0.94156	1.09589	0.0471626
gi|472586311	RHTO_06898	20S proteasome subunit alpha 5	6	7	7	6	7	7	1.0583	0.96249	1.6366	1.3922	0.84121	1.0099	1.18674	0.195536
gi|472586140	RHTO_06727	20S proteasome subunit alpha 6	9	9	7	9	9	7	0.72796	1.017	1.0866	0.95883	0.64561	0.73238	1.40806	0.125115
gi|472583590	RHTO_02094	20S proteasome subunit alpha 7	5	5	7	5	5	7	0.78566	1.0003	1.1719	1.0944	0.92631	1.1286	1.10976	0.240232
gi|472581092	RHTO_05594	20S proteasome subunit beta 2	1	4	2	1	4	2	0.50247	0.74033	0.78297	0.5343	1.8295	0.78956	0.906563	0.509068
gi|472586635	RHTO_06158	20S proteasome subunit beta 3	4	6	5	4	6	5	0.82715	1.0154	1.2608	1.0985	1.9809	1.2164	0.843285	0.349539
gi|472583151	RHTO_02421	20S proteasome subunit beta 4	3	1	2	3	1	2	2.7658	0.66377	2.985	3.615	1.1933	1.2289	0.917884	0.159828
gi|472588349	RHTO_00249	20S proteasome subunit beta 5	3	6	4	3	6	4	0.65735	1.2313	1.2025	0.88045	0.30745	0.36721	3.03821	0.278638
gi|472585543	RHTO_07436	20S proteasome subunit beta 6	3	4	3	3	4	3	0.90303	1.201	1.5567	1.24	0.77902	0.73872	1.38162	0.114501
gi|472587005	RHTO_04683	20S proteasome subunit beta 7	2	2	3	2	2	3	0.68616	1.0531	1.5251	0.90952	0.22739	0.32182	4.13032	0.918952
gi|472584692	RHTO_01032	20S proteasome subunit,threonine-type endopeptidase	9	9	8	9	9	8	0.87781	1.0104	1.6839	1.16	1.4253	0.97338	0.624545	0.446351
gi|472585911	RHTO_07187	20S proteasome subunit,threonine-type endopeptidase	2	2	2	1	1	1	0.79372	1.6859	2.6752	1.0491	0.84983	NaN	1.253	0.107895
gi|472585921	RHTO_07197	20S-pre-rRNA D-site endonuclease NOB1	2	1	2	2	1	2	1.2358	1.8691	1.7661	1.557	0.85929	0.66695	1.33883	0.168278
gi|472580610	RHTO_06442	26S non-ATPase regulatory subunit	6	5	3	6	5	3	1.4812	1.8154	1.6787	1.9552	1.1776	0.73968	1.37065	0.531075
gi|472580274	RHTO_06702	26S protease regulatory subunit 6a	8	9	10	8	9	10	0.87711	1.0287	1.4483	1.121	1.505	1.8032	0.760273	0.266845
gi|472587592	RHTO_02815	26S protease regulatory subunit 7	11	7	12	11	7	12	0.94252	0.98963	1.376	1.0715	0.68356	NaN	#VALUE!	#VALUE!
gi|472586701	RHTO_06224	26S protease regulatory subunit 8	9	8	11	1	1	1	0.77853	0.89466	1.1892	1.0123	0.59692	0.66496	1.92114	0.580682
gi|472587861	RHTO_03085	26S protease regulatory subunit S10B	15	17	18	15	17	17	0.81957	1.1551	1.4505	1.1051	0.82685	1.0823	1.00729	0.175939
gi|472585565	RHTO_07458	26S proteasome complex ubiquitin receptor, subunit Rpn13	6	5	5	6	5	5	0.86362	1.2794	1.3862	1.2262	0.6193	0.80526	1.16716	0.489201
gi|472584859	RHTO_00713	26S proteasome non-ATPase regulatory subunit 10	2	2	1	2	2	1	1.9045	1.8307	2.8042	2.388	1.0596	NaN	1.33718	0.556394
gi|472583338	RHTO_02179	26S proteasome non-atpase regulatory subunit 11	12	7	9	12	7	9	0.95943	1.327	1.4161	1.2123	1.0928	1.3698	0.80607	0.09683
gi|472584865	RHTO_00719	26S proteasome non-atpase regulatory subunit 3	13	18	14	4	6	5	0.94299	1.1604	1.392	1.1734	1.1982	1.4278	0.747977	0.0751275
gi|472585910	RHTO_07186	26S proteasome non-atpase regulatory subunit 8	7	6	8	2	2	2	0.96758	1.771	2.113	1.1636	0.59762	0.85107	1.29398	0.33602
gi|472586809	RHTO_06332	26S proteasome non-atpase regulatory subunit 9	4	3	4	4	3	4	1.5679	1.3813	1.8299	1.9599	0.38274	0.55582	1.89995	0.668117
gi|472583923	RHTO_01599	26S proteasome regulatory subunit	19	24	20	19	24	20	1.0253	1.2312	1.5865	1.304	3.8145	2.1756	0.28289	0.167354
gi|472584274	RHTO_01527	26S proteasome regulatory subunit	13	14	18	1	1	1	0.63771	0.81343	1.0804	0.75773	0.84658	1.4897	0.918696	0.255309
gi|472580695	RHTO_05870	26S proteasome regulatory subunit N10	4	3	4	4	3	4	0.90864	1.4551	1.9256	1.3733	0.41224	0.44301	2.40477	0.13819
gi|472580858	RHTO_05728	26S proteasome regulatory subunit N5	10	11	9	10	11	9	1.0838	1.4521	1.5543	1.453	0.45015	0.46807	2.14865	0.0675586
gi|472583236	RHTO_02178	26S proteasome regulatory subunit N7	6	9	10	6	9	10	1.0789	1.8005	1.4878	1.3845	3.3769	NaN	#VALUE!	#VALUE!
gi|472582869	RHTO_03459	26S proteasome regulatory subunit N9	10	15	10	10	15	10	0.9648	1.0242	1.146	1.1568	0.44147	0.55209	2.13553	0.282666
gi|472583700	RHTO_01790	26S proteasome regulatory subunit rnp-8	8	9	7	8	9	7	0.79913	1.103	1.4051	1.196	0.27597	0.19454	4.32878	0.763946
gi|472584966	RHTO_00820	26S proteasome regulatory subunit T2	9	9	11	9	9	11	0.76146	0.97176	1.027	1.1042	0.60878	0.74679	1.20463	0.51846
gi|472586265	RHTO_06852	26S proteasome regulatory subunit t3	14	17	15	14	17	14	1.0191	1.0816	1.2331	1.3713	0.66691	0.66084	1.54725	0.0711882
gi|472583459	RHTO_01962	2-acylglycerol O-acyltransferase 2	1	0	0	1	0	0	0.35919	NaN	NaN	0.42278	0.80039	0.93779	0.983684	0.315267
gi|472581710	RHTO_04434	2-deoxyglucose-6-phosphatase	5	4	5	5	4	5	0.57413	0.99908	1.3609	0.78651	0.60951	0.77706	1.53473	0.215374
gi|472580806	RHTO_05831	2-hydroxyacid dehydrogenase	1	3	2	1	3	2	0.37226	0.55716	0.80541	0.51168	0.24556	0.46497	2.98725	0.98463
gi|472587885	RHTO_03109	2-isopropylmalate synthase	34	31	34	2	2	2	1.1073	1.3354	1.5915	1.3809	NaN	0.38942	#VALUE!	#VALUE!
gi|472587363	RHTO_05042	2-methylcitrate dehydratase	19	26	19	19	26	19	0.43181	0.67031	0.96087	0.57615	2.57	1.8165	0.470757	0.0807188
gi|472586987	RHTO_04665	2-nitropropane dioxygenase	3	9	4	3	9	4	0.27932	0.39407	0.48896	0.42354	3.3254	NaN	#VALUE!	#VALUE!
gi|472585435	RHTO_07860	2-oxoglutarate dehydrogenase E1 component (succinyl-transferring)	37	33	42	2	2	3	0.78287	0.94129	1.1865	1.0613	0.66659	0.93133	1.255	0.220286
gi|472583339	RHTO_02312	2-oxoglutarate dehydrogenase E2 component (dihydrolipoamide succinyltransferase)	13	17	12	13	17	12	0.94698	1.2014	1.6381	1.2542	1.5148	2.2163	0.565304	0.105797
gi|472587835	RHTO_03059	2-oxoisovalerate dehydrogenase E1 component, beta subunit	1	1	1	1	1	1	0.30781	0.14324	0.42353	0.4185	0.7398	NaN	#VALUE!	#VALUE!
gi|472584197	RHTO_01450	3' tRNA processing endoribonuclease	2	4	1	2	4	1	1.2499	1.1515	1.0527	1.6755	0.90972	1.1859	1.01883	0.152243
gi|472582433	RHTO_03653	3'(2'), 5'-bisphosphate nucleotidase	9	12	10	9	12	10	0.67848	0.73326	1.0476	0.85135	1.3333	1.2336	0.870719	0.15947
gi|472581032	RHTO_05534	3,4-dihydroxy-2-butanone-4-phosphate synthase	10	6	4	10	6	4	0.96886	1.2036	1.3126	1.2528	0.69559	0.75374	1.37422	0.0571416
gi|472584883	RHTO_00737	3',5'-cyclic-nucleotide phosphodiesterase	0	2	0	0	2	0	NaN	0.34758	NaN	NaN	0.91141	1.0066	1.05362	0.0538331
gi|472584702	RHTO_01042	3-alpha(or 20-beta)-hydroxysteroid dehydrogenase	1	1	1	1	1	1	0.65145	0.75578	0.4437	0.99388	1.0865	1.4552	0.850443	0.141863
gi|472582622	RHTO_03536	3-carboxymuconate cyclase	3	4	4	2	3	2	0.6942	0.85927	1.1095	0.93971	0.87227	0.90277	1.11898	0.0239019
gi|472582739	RHTO_03329	3-dehydroquinate dehydratase	2	1	3	2	1	3	1.4625	1.0713	1.2607	1.614	0.8204	0.87484	1.24377	0.115165
gi|472583243	RHTO_02272	3-deoxy-7-phosphoheptulonate synthase	16	14	15	16	14	15	1.1543	1.1771	1.5295	1.4425	1.5385	1.3038	0.761551	0.108949
gi|472582537	RHTO_03757	3-deoxy-8-phosphoheptulonate synthase	14	16	13	14	16	13	0.61197	0.62789	1.0229	0.74381	0.54159	0.6665	1.67196	0.173038
gi|472587930	RHTO_03154	3-deoxy-9-phosphoheptulonate synthase	5	9	6	5	9	6	0.92899	1.1529	1.597	1.1666	1.3906	1.307	0.729699	0.0314841
gi|472581203	RHTO_05520	3-hydroxyacyl-CoA dehyrogenase	7	10	11	7	10	11	0.62769	0.40567	0.58588	0.814	0.86036	1.7933	0.904394	0.311975
gi|472582559	RHTO_03473	3-hydroxyacyl-CoA-dehydrogenase, mitochondrial	7	9	10	7	9	10	0.3337	0.51078	0.70749	0.40219	0.93277	NaN	1.68549	0.867498
gi|472586940	RHTO_04617	3-hydroxyanthranilate 3,4-dioxygenase	3	3	2	3	3	2	0.8733	1.3182	1.686	1.072	3.6661	1.4106	0.471767	0.220563
gi|472587577	RHTO_02800	3-hydroxybutyryl-CoA dehydrogenase	2	3	2	2	3	2	0.14145	0.38219	0.45306	0.20053	1.7652	1.8374	0.584918	0.0523616
gi|472583694	RHTO_01784	3-hydroxyisobutyrate dehydrogenase	10	10	13	10	10	13	0.55379	0.61419	0.73254	0.68776	1.6482	1.2231	0.670058	0.128196
gi|472587616	RHTO_02839	3-hydroxyisobutyrate dehydrogenase	23	26	23	9	11	10	1.1362	1.3606	1.4192	1.6474	0.79729	1.2634	1.07849	0.250615
gi|472586453	RHTO_07040	3-isopropylmalate dehydratase	26	27	28	26	27	28	1.6436	1.6971	2.1206	2.1017	0.80165	0.84241	1.13091	0.152564
gi|472585920	RHTO_07196	3-isopropylmalate dehydrogenase	10	14	13	10	14	13	0.85137	1.165	1.3985	1.1156	0.8778	0.74795	1.33112	0.18905
gi|472587625	RHTO_02848	3-ketoacyl-CoA thiolase (POT1)	7	10	10	7	10	10	1.0654	1.0118	1.1889	1.2461	5.8765	0.66097	0.91846	0.684468
gi|472585842	RHTO_07118	3-ketoacyl-coA thiolase peroxisomal A precursor	6	4	7	6	4	7	0.37354	1.1438	0.96343	0.44263	0.82993	0.749	1.34942	0.152159
gi|472588576	RHTO_00476	3-ketoacyl-CoA thiolase, mitochondrial	11	11	11	11	11	11	0.30378	0.35147	0.49443	0.38996	1.1813	1.1401	0.854259	0.0201361
gi|472580371	RHTO_06605	3-methyl-2-oxobutanoate hydroxymethyltransferase	1	0	1	1	0	1	1.0025	NaN	1.7291	1.1617	1.037	1.7891	0.817975	0.224961
gi|472582658	RHTO_03572	3-methyl-2-oxobutanoate hydroxymethyltransferase	2	1	4	2	1	4	0.9089	1.7966	1.5354	1.2189	0.12614	0.12505	5.89739	3.57662
gi|472588107	RHTO_00007	3-methylcrotonyl-CoA carboxylase beta subunit	3	2	1	3	2	1	0.34899	0.5194	0.33142	0.42599	NaN	0.45293	#VALUE!	#VALUE!
gi|472582177	RHTO_03917	3-oxoacyl-(acyl-carrier-protein) reductase	3	1	1	3	1	1	0.83025	0.47027	1.1086	1.0531	0.061909	0.29411	7.57665	7.42795
gi|472582752	RHTO_03342	3-oxoacyl-[acyl-carrier protein] reductase	3	2	2	2	2	1	0.4155	0.41932	0.41075	0.57512	NaN	NaN	#VALUE!	#VALUE!
gi|472582758	RHTO_03348	3-oxoacyl-[acyl-carrier protein] reductase	9	10	10	8	10	9	0.56928	0.65736	0.79624	0.77869	0.095937	0.085307	9.62165	2.59624
gi|472585680	RHTO_07573	4-aminobutyrate aminotransferase / (S)-3-amino-2-methylpropionate transaminase	2	3	1	2	3	1	1.8206	0.87365	1.2757	2.4316	0.18675	NaN	#VALUE!	#VALUE!
gi|472588302	RHTO_00202	4-aminobutyrate transaminase	13	13	13	13	13	13	0.85077	0.84467	1.1403	1.0886	0.75468	1.026	1.13986	0.176057
gi|472584880	RHTO_00734	4-nitrophenylphosphatase	4	5	1	4	5	1	0.51649	0.81674	0.42024	0.56531	0.16513	0.19862	6.11442	1.11013
gi|472584987	RHTO_00841	4-nitrophenylphosphatase	1	3	3	1	3	3	1.2642	1.5074	0.91182	1.5087	0.6092	0.91251	1.33267	0.279853
gi|472588547	RHTO_00447	5'-3' exoribonuclease 1	13	18	16	13	18	16	0.93362	1.0596	1.2503	1.2418	NaN	1.5484	#VALUE!	#VALUE!
gi|472584595	RHTO_00935	5'-3' exoribonuclease 2	10	8	6	10	8	6	0.69338	0.83588	1.0719	0.92017	0.8094	1.0064	1.32785	0.388707
gi|472583543	RHTO_02047	5-aminolevulinate synthase	6	5	6	6	5	6	0.57907	0.73243	0.78409	0.78989	1.1555	1.2031	0.945357	0.168966
gi|472583688	RHTO_01778	5-coumarate-CoA ligase	0	3	3	0	3	3	NaN	0.61778	0.77256	NaN	0.45486	0.46892	1.86062	0.529124
gi|472587285	RHTO_04964	5-formyltetrahydrofolate cyclo-ligase	0	2	1	0	2	1	NaN	0.86988	1.5223	NaN	0.72961	0.92202	1.42002	0.362693
gi|472584010	RHTO_01686	5-methyltetrahydropteroyltriglutamate-homocysteine S-methyltransferase	12	12	12	6	5	6	1.4014	1.5611	1.7862	2.0332	0.33933	0.44778	2.37063	0.521419
gi|472584048	RHTO_01724	5-methyltetrahydropteroyltriglutamate-homocysteine S-methyltransferase	7	7	7	1	0	1	0.6151	NaN	1.1159	0.82043	0.94141	1.0731	1.36276	0.636753
gi|472585267	RHTO_07691	5-methyltetrahydropteroyltriglutamate-homocysteine S-methyltransferase	56	56	47	56	56	47	2.0655	2.3218	3.044	2.6542	0.96528	0.63821	1.35154	0.279286
gi|472580759	RHTO_05934	5'-methylthioadenosine phosphorylase	14	16	15	14	16	15	0.31746	0.36879	0.51559	0.4188	0.58766	0.92977	1.40411	0.314215
gi|472583989	RHTO_01665	5'-Nucleotidase/apyrase family protein	1	1	3	1	1	3	0.92751	0.3852	0.60118	1.0569	0.99242	0.66749	1.02248	0.468431
gi|472581411	RHTO_05313	5-oxoprolinase	0	1	3	0	1	3	NaN	0.47412	0.60937	NaN	NaN	0.8852	#VALUE!	#VALUE!
gi|472587728	RHTO_02952	5-oxoprolinase	3	4	4	3	4	4	0.57297	0.49153	0.69187	0.72521	0.29598	0.38161	2.54998	0.866035
gi|472581986	RHTO_04229	6,7-dimethyl-8-ribityllumazine synthase, riboflavin biosynthetic process	3	2	2	3	2	2	1.1807	0.98625	2.0756	1.4848	NaN	NaN	#VALUE!	#VALUE!
gi|472588600	RHTO_00500	60kDa lysophospholipase	1	1	2	1	1	2	NaN	NaN	0.38192	NaN	NaN	0.35204	#VALUE!	#VALUE!
gi|472583023	RHTO_02633	6-coumarate-CoA ligase	6	8	7	6	8	7	0.48596	0.67963	0.67754	0.64413	1.0011	0.86413	1.08279	0.0795871
gi|472587565	RHTO_02788	6-phosphogluconate dehydrogenase	41	37	33	41	37	33	0.7515	0.89723	1.2366	0.99579	0.85032	0.8456	1.14255	0.0637499
gi|472585020	RHTO_07939	6-phosphogluconolactonase	10	10	8	10	10	8	0.53172	0.51154	0.81892	0.66513	0.6725	0.82628	1.35403	0.138691
gi|472588621	RHTO_00521	7alpha-cephem-methoxylase P8 chain related protein	1	0	1	1	0	1	13.646	NaN	1.3506	17.018	0.80463	1.097	1.19445	0.262059
gi|472582279	RHTO_03769	8-amino-7-oxononanoate synthase	0	1	1	0	1	1	NaN	1.7593	1.1968	NaN	0.51135	0.42873	2.43368	0.53589
gi|472580465	RHTO_06566	AAA family ATPase	0	2	4	0	2	4	NaN	0.82931	0.99133	NaN	0.6363	0.56865	1.77287	0.208809
gi|472586960	RHTO_04638	AAA family ATPase	4	2	3	4	2	3	0.79842	0.9928	1.1621	0.91761	1.0118	1.0936	1.05793	0.188231
gi|472588592	RHTO_00492	AAA family ATPase Rvb2	11	12	12	11	12	12	1.0078	1.2935	1.4256	1.4038	0.76099	0.89531	1.15521	0.143613
gi|472581321	RHTO_05437	ABC bile acid transporter	3	4	5	2	1	3	0.64762	0.73257	1.0602	0.72842	0.41546	0.52952	2.11274	0.266228
gi|472587104	RHTO_04782	ABC drug exporter AtrF	0	0	2	0	0	2	NaN	NaN	0.73894	NaN	0.94303	0.84319	1.04928	0.142577
gi|472586672	RHTO_06195	ABC fatty acid transporter	1	3	1	1	3	1	0.99275	2.219	0.089491	1.1763	0.69204	0.74924	1.38984	0.0780062
gi|472586765	RHTO_06288	ABC metal ion transporter, putative	9	9	8	9	9	8	0.58366	0.61301	0.68154	0.73842	NaN	0.89487	1.14453	0.0382522
gi|472581138	RHTO_05455	ABC transporter	2	1	3	2	1	3	0.32388	0.18118	0.30619	0.42234	0.97126	1.113	1.10149	0.246946
gi|472582643	RHTO_03557	ABC transporter	3	4	3	3	4	3	2.5846	1.6484	1.1332	3.1512	0.91981	1.2049	0.958563	0.181894
gi|472582973	RHTO_02583	ABC transporter	3	4	2	3	4	2	0.19676	0.32143	0.46876	0.26825	0.55618	0.54927	1.69635	0.19595
gi|472582987	RHTO_02597	ABC transporter	10	8	9	10	8	9	0.87727	0.97119	1.0859	1.0908	NaN	NaN	#VALUE!	#VALUE!
gi|472587257	RHTO_04936	ABC transporter	8	7	11	8	7	11	1.6855	1.4108	1.044	2.1983	0.83025	NaN	1.04136	0.230648
gi|472588366	RHTO_00266	ABC transporter	1	3	4	1	3	4	0.34331	0.51188	0.59197	0.42774	0.3443	0.38875	2.56989	0.335783
gi|472585805	RHTO_07081	ABC1 family protein	1	1	1	1	1	1	0.73252	0.69894	1.0074	0.95478	0.56132	0.57727	3.15268	2.41769
gi|472586450	RHTO_07037	ABC-2 type transporter, pleiotropic drug resistance	14	17	16	14	17	16	0.22517	0.30299	0.52649	0.30569	1.104	0.95491	0.976508	0.1
gi|472581531	RHTO_05212	abhydrolase domain-containing protein 12	1	3	2	1	3	2	0.83642	1.3491	1.1001	1.0948	1.0941	0.95729	1.01045	0.0847058
gi|472587676	RHTO_02900	acetoacetate-CoA synthase	7	5	6	7	5	6	0.27876	0.45743	0.62999	0.38414	NaN	1.1609	#VALUE!	#VALUE!
gi|472585532	RHTO_07425	acetolactate synthase	3	2	0	3	2	0	0.43902	0.5119	NaN	0.56652	NaN	NaN	#VALUE!	#VALUE!
gi|472588073	RHTO_03298	acetolactate synthase	8	12	12	8	12	12	1.1938	1.7732	1.7886	1.5896	0.38847	0.28745	3.21928	0.56219
gi|472582248	RHTO_03988	acetolactate synthase small subunit	13	9	10	13	9	10	1.0797	1.5105	1.6745	1.3812	2.1827	3.5346	0.422905	0.126115
gi|472583544	RHTO_02048	acetyl-CoA C-acetyltransferase	13	18	21	13	18	21	0.37501	0.36693	0.55566	0.4772	0.47403	0.45231	2.05304	0.192431
gi|472583500	RHTO_02004	acetyl-CoA carboxylase	84	93	87	84	93	87	0.29861	0.34385	0.49748	0.38561	1.5442	NaN	0.752682	0.148631
gi|472585830	RHTO_07106	acetyl-CoA hydrolase	12	15	14	12	15	14	0.31266	0.34789	0.54263	0.41951	2.8531	2.1501	0.392049	0.0634593
gi|472585108	RHTO_08027	acetyl-CoA synthetase	13	22	19	13	22	19	0.329	0.35053	0.68807	0.40195	NaN	1.0964	1.16068	0.351579
gi|472586416	RHTO_07003	acetylornithine aminotransferase	10	13	12	0	1	1	0.6421	0.84894	0.99261	0.84569	NaN	NaN	#VALUE!	#VALUE!
gi|472586939	RHTO_04616	acetylserotonin o-methyltransferase-like	2	1	0	2	1	0	0.87238	1.201	NaN	1.139	NaN	0.44839	2.07544	0.218867
gi|472582317	RHTO_03807	acetyltransferase GNAT family	3	2	3	3	2	3	2.3394	3.348	4.4974	2.7516	0.78508	0.52242	1.45076	0.405032
gi|472587575	RHTO_02798	acetyltransferase GNAT family	0	3	0	0	3	0	NaN	0.76146	NaN	NaN	1.0263	NaN	1.41891	0.628669
gi|472580232	RHTO_07386	acid phosphatase	7	4	3	7	4	3	0.1484	0.069343	0.13984	0.19049	1.3472	1.7572	0.61673	0.109778
gi|472584109	RHTO_01362	acid phosphatase	5	3	4	2	1	1	0.16924	0.21522	0.16448	0.2131	NaN	1.0531	0.920779	0.0407268
gi|472585884	RHTO_07160	acid phosphatase	2	2	2	2	2	2	0.51435	0.083055	0.1377	0.66342	0.65115	NaN	#VALUE!	#VALUE!
gi|472583065	RHTO_02333	acid phosphatase (partial sequence c terminus)	1	3	3	1	3	3	0.51787	0.66355	0.66265	0.72851	1.6488	1.2368	0.72918	0.10776
gi|472585111	RHTO_08030	aconitate hydratase	13	21	19	13	21	19	1.1916	1.1757	1.4985	1.5987	NaN	0.46975	#VALUE!	#VALUE!
gi|472588639	RHTO_00539	aconitate hydratase	26	35	32	26	35	32	0.76197	0.75279	1.3583	0.97627	NaN	NaN	#VALUE!	#VALUE!
gi|472582646	RHTO_03560	actin	21	22	22	11	13	12	0.6845	0.80118	1.1774	0.89475	0.56556	0.66101	1.59846	0.146963
gi|472582179	RHTO_03919	actin binding protein	10	10	11	10	10	11	0.59225	0.83893	0.93813	0.86974	2.286	1.4381	0.591744	0.136223
gi|472588176	RHTO_00076	actin binding protein	17	20	18	2	3	2	0.56106	0.81623	1.0365	0.72398	1.1662	0.87147	0.958811	0.163547
gi|472583315	RHTO_02143	actin cortical patch component	12	13	14	5	7	9	0.53348	0.5412	0.75332	0.76345	0.56203	0.55531	1.8973	0.18611
gi|472581983	RHTO_04226	actin cortical patch component Lsb4	2	1	2	2	1	2	0.51373	0.6105	1.0084	0.73332	0.96617	0.7547	1.21879	0.159796
gi|472581241	RHTO_05357	actin cortical patch SUR7/pH-response regulator PalI family protein	0	2	1	0	2	1	NaN	1.6679	0.8647	NaN	0.90424	1.0168	1.07018	0.0754699
gi|472580730	RHTO_05905	actin cytoskeleton organization protein	1	3	2	1	1	2	0.63766	1.7297	1.1663	0.8313	1.1996	1.3006	0.771309	0.061122
gi|472587707	RHTO_02931	actin cytoskeleton organization protein	1	3	3	1	3	3	0.69622	1.1385	1.2543	0.90752	0.84335	0.8464	1.06846	0.199462
gi|472586808	RHTO_06331	actin cytoskeleton protein	16	13	13	3	2	3	0.22675	0.26983	0.35651	0.31859	NaN	0.42127	1.8821	0.695327
gi|472587163	RHTO_04841	actin ii (centractin-like protein)	4	5	8	4	5	8	0.51882	0.83736	0.84968	0.66335	1.1671	0.65654	1.54109	0.693417
gi|472583598	RHTO_02102	actin lateral binding protein	9	6	4	9	6	4	0.15821	0.21635	0.39441	0.20467	NaN	NaN	#VALUE!	#VALUE!
gi|472580657	RHTO_05972	actin patch protein	1	2	1	1	1	1	5.3407	1.1261	0.87477	6.9118	0.90798	0.85308	1.16975	0.067202
gi|472581805	RHTO_04294	actin polymerization protein	1	2	0	1	2	0	0.48086	0.78492	NaN	0.75228	0.77604	0.93636	1.18522	0.110968
gi|472582037	RHTO_04031	actin regulatory protein	3	5	3	3	5	3	0.57833	0.76969	0.72187	0.73889	NaN	NaN	#VALUE!	#VALUE!
gi|472587764	RHTO_02989	actin-binding protein	1	3	3	1	3	3	0.47248	0.91512	0.7962	0.52333	0.69771	0.96691	1.20116	0.207347
gi|472584879	RHTO_00733	actin-binding, cofilin/tropomyosin type domain containing protein	6	7	8	6	7	8	0.72716	1.3589	1.9705	0.9418	NaN	2.0822	#VALUE!	#VALUE!
gi|472587794	RHTO_03018	actin-bundling protein	0	1	0	0	1	0	NaN	0.57864	NaN	NaN	2.2875	0.71304	0.88531	0.486327
gi|472587370	RHTO_05049	actin-interacting protein 3	2	1	4	2	1	4	0.29076	0.53326	0.65305	0.38695	2.4491	1.8885	0.468917	0.0857067
gi|472581948	RHTO_04191	actin-related protein	4	3	1	4	3	1	0.86058	0.74805	1.1709	1.1255	1.7178	1.6203	0.602453	0.0181732
gi|472583411	RHTO_02163	actin-related protein 2/3 complex subunit 1A	2	7	7	1	3	3	1.1342	0.5465	0.91097	1.5506	2.1368	1.5189	0.582031	0.100635
gi|472585054	RHTO_07973	actin-related protein 5	1	2	0	1	2	0	0.48543	1.0366	NaN	0.57783	NaN	0.84522	1.68494	0.70967
gi|472586261	RHTO_06848	actin-related protein Arp4p	8	8	11	8	8	11	1.0003	0.86935	1.3671	1.2935	0.62535	0.93937	1.40094	0.292865
gi|472587920	RHTO_03144	activator of Hsp90 ATPase, N-terminal domian containing protein	5	4	4	5	4	4	1.0787	0.93366	1.5718	1.4105	1.2307	0.8109	0.856508	0.356746
gi|472585741	RHTO_07634	acylaminoacyl-peptidase	1	2	1	1	2	1	0.87582	0.57316	0.93364	0.96745	1.7394	0.99553	0.856467	0.243943
gi|472584708	RHTO_01048	acyl-carrier protein	2	3	2	2	3	2	0.59176	0.28982	0.65048	0.77642	NaN	0.83848	#VALUE!	#VALUE!
gi|472580655	RHTO_05970	acyl-CoA dehydrogenase	1	1	1	1	1	1	5.7301	3.4726	2.3447	7.8822	0.5818	0.67587	1.62852	0.129959
gi|472580772	RHTO_05797	acyl-CoA dehydrogenase	2	5	8	2	5	8	0.86281	0.91049	1.4664	1.1067	1.1086	1.0439	0.956682	0.0540219
gi|472583949	RHTO_01625	acyl-CoA dehydrogenase	10	10	11	10	10	11	0.30213	0.35512	0.47253	0.39506	0.88684	1.2678	1.01926	0.199734
gi|472586151	RHTO_06738	acyl-CoA dehydrogenase	6	4	6	6	4	6	0.35779	0.42097	0.51221	0.47892	0.98186	0.95543	0.90614	0.219422
gi|472586902	RHTO_04579	acyl-CoA dehydrogenase	0	1	0	0	1	0	NaN	3.0251	NaN	NaN	1.2295	1.3107	0.859974	0.126937
gi|472588497	RHTO_00397	acyl-CoA dehydrogenase	13	11	11	13	11	11	0.36425	0.41447	0.5648	0.42916	1.0389	NaN	#VALUE!	#VALUE!
gi|472583195	RHTO_02465	acyl-CoA N-acyltransferase domain protein	9	6	8	4	3	4	0.1845	0.27504	0.2461	0.23683	2.2675	1.1942	0.515795	0.291481
gi|472582151	RHTO_03890	acyl-CoA oxidase	1	3	2	1	3	2	1.2347	0.51785	0.82383	1.5818	1.6354	1.0664	0.709036	0.198769
gi|472582286	RHTO_03776	acyl-CoA oxidase	2	5	2	2	5	2	0.46841	0.71147	0.7028	0.61385	1.108	NaN	0.977159	0.105545
gi|472585985	RHTO_07261	acyl-CoA thioester hydrolase	5	2	2	5	2	2	1.2218	0.73144	0.96916	1.574	1.4724	1.0296	0.712637	0.243609
gi|472584308	RHTO_01116	acyl-CoA thioesterase 8	4	3	7	4	3	7	0.47808	0.51642	0.82655	0.59644	0.59293	0.67702	1.70143	0.232174
gi|472582363	RHTO_03853	acyl-CoA-binding protein, ACBP	11	12	10	11	12	10	0.33666	0.25303	0.55956	0.36513	0.59991	0.6806	1.51357	0.136691
gi|472584519	RHTO_00859	acyl-CoA-binding protein, ACBP	0	0	2	0	0	2	NaN	NaN	0.39123	NaN	NaN	1.3626	0.865003	0.18542
gi|472582105	RHTO_04099	acyl-protein thioesterase 1	2	2	3	2	2	3	1.7369	2.4852	1.9779	2.1157	0.89705	2.0539	0.800822	0.443983
gi|472587347	RHTO_05026	acyltransferase domain-containing protein	0	1	0	0	1	0	NaN	2.8031	NaN	NaN	0.95438	1.2549	0.831371	0.201411
gi|472581468	RHTO_05149	adenine phosphoribosyltransferase	4	5	5	4	5	5	0.65483	0.62138	0.88288	0.83957	2.0503	1.2439	0.66753	0.162502
gi|472581095	RHTO_05597	adenosine deaminase	3	4	3	3	4	3	1.473	1.3842	2.1882	1.7107	1.7863	1.7032	0.615318	0.0737526
gi|472584019	RHTO_01695	adenosylhomocysteinase	24	19	23	24	19	23	0.76982	0.79982	1.3928	0.89766	1.7024	1.9021	0.548493	0.0338607
gi|472582274	RHTO_03764	adenosylmethionine-8-amino-7-oxononanoate aminotransferase	3	7	6	3	7	6	0.82433	1.232	1.3024	0.95102	1.4015	1.9054	0.578118	0.118145
gi|472588211	RHTO_00111	adenylosuccinate lyase	20	21	20	20	21	20	0.78797	0.936	1.5054	1.0596	0.53756	0.61427	1.58746	0.295139
gi|472583383	RHTO_02257	adenylosuccinate synthetase	13	16	11	4	4	4	0.69141	0.79507	0.99702	0.90678	1.4869	0.9541	0.939444	0.23247
gi|472587737	RHTO_02961	adenylyl cyclase-associated protein	11	15	13	11	15	13	0.5932	0.75287	0.95121	0.73028	0.78434	0.87738	1.24413	0.0928804
gi|472582902	RHTO_02512	ADP-ribose pyrophosphatase	7	5	5	7	5	5	0.44946	0.50537	0.86244	0.59913	NaN	1.0452	1.17223	0.304734
gi|472585355	RHTO_07779	ADP-ribosylation factor	12	11	12	11	11	12	1.123	1.2815	1.2575	1.4187	1.1117	1.15	0.975191	0.157717
gi|472580341	RHTO_06645	ADP-ribosylation factor 6	3	1	1	2	1	1	0.77216	0.79106	1.7292	1.0068	2.6711	1.2393	1.037	0.802795
gi|472580608	RHTO_06440	ADP-ribosylation factor-like protein 8b	1	1	0	1	1	0	0.33396	0.88987	NaN	0.43499	2.5448	1.7219	0.567065	0.167683
gi|472583542	RHTO_02046	ADP-ribosylation factor-related protein 1	1	1	1	1	1	1	1.916	3.3542	1.4831	2.3062	0.94642	0.51854	1.41353	0.456919
gi|472587977	RHTO_03202	adrenodoxin-type ferredoxin	1	1	1	1	1	1	1.3183	1.7334	2.0547	1.5528	3.5722	3.4455	0.257155	0.0486517
gi|472587338	RHTO_05017	AFG3 family protein	24	24	19	2	2	1	1.2861	1.4758	1.3912	1.7069	0.61941	1.1757	1.19997	0.386074
gi|472581510	RHTO_05191	alanine-glyoxylate transaminase / serine-glyoxylate transaminase / serine-pyruvate transaminase	6	10	14	6	10	14	0.50214	0.67558	0.83864	0.66303	0.60543	0.75613	1.39881	0.2247
gi|472586541	RHTO_06064	alanine-tRNA synthetase	34	36	38	3	4	4	0.84123	1.0012	1.2968	1.1917	1.0449	1.1997	1.15473	0.453589
gi|472582909	RHTO_02519	alcohol dehydrogenase	4	3	3	4	3	3	0.94551	1.0107	2.1982	1.0745	0.96608	1.2883	1.04707	0.277023
gi|472584049	RHTO_01725	alcohol dehydrogenase	3	4	4	3	4	4	0.43937	0.11753	0.12788	0.56572	1.4624	1.1184	0.776739	0.107276
gi|472587007	RHTO_04685	alcohol dehydrogenase	0	1	3	0	1	3	NaN	NaN	0.47553	NaN	1.2026	2.9828	1.10263	0.932945
gi|472587838	RHTO_03062	alcohol dehydrogenase	10	9	7	10	9	7	0.25931	0.062225	0.33768	0.31475	0.7341	0.74802	1.30254	0.0823902
gi|472588613	RHTO_00513	alcohol dehydrogenase	4	6	5	0	0	1	NaN	NaN	NaN	NaN	1.373	1.304	0.74035	0.0230014
gi|472588617	RHTO_00517	alcohol dehydrogenase	6	7	6	2	1	2	0.10729	0.088555	0.08241	0.14883	0.65634	1.3164	1.45033	0.657117
gi|472583840	RHTO_01930	alcohol dehydrogenase (NADP+)	0	1	0	0	1	0	NaN	0.12848	NaN	NaN	1.1785	0.91855	0.926533	0.140451
gi|472581623	RHTO_04543	aldehyde dehydrogenase	10	12	12	10	12	12	0.69307	0.67656	1.2513	0.89296	1.0362	NaN	1.11899	0.217681
gi|472581821	RHTO_04310	aldehyde dehydrogenase	9	8	8	9	8	8	0.10208	0.13543	0.19046	0.13788	0.67945	0.82715	1.34037	0.185833
gi|472583978	RHTO_01654	aldehyde Dehydrogenase	5	5	10	0	1	1	0.57298	0.50911	0.8358	0.79326	0.27728	0.27814	2.99667	1.04655
gi|472586137	RHTO_06724	aldehyde dehydrogenase	0	0	2	0	0	2	NaN	NaN	1.9168	NaN	1.8776	1.1115	0.71614	0.259572
gi|472580813	RHTO_05838	aldehyde dehydrogenase (NAD)	16	20	21	16	20	21	0.43873	0.71444	1.0188	0.56999	0.873	1.1603	1.13394	0.266507
gi|472580989	RHTO_05680	aldehyde dehydrogenase family 3 member B1	8	9	9	8	9	9	0.7112	1.0832	1.3284	0.87761	1.4047	1.225	0.684809	0.146945
gi|472588219	RHTO_00119	aldehyde dehydrogenase family 7 member A1	3	2	1	3	2	1	0.58141	0.37432	0.49421	0.79947	0.85157	0.63528	1.40302	0.206039
gi|472581701	RHTO_04425	aldehyde dehydrogenase, mitochondrial	2	4	3	2	4	3	0.38261	0.60292	0.86712	0.55405	1.0285	0.78396	1.36066	0.437171
gi|472582224	RHTO_03964	aldehyde reductase	1	2	1	1	1	1	0.34235	0.29333	0.46201	0.51769	1.425	1.3841	0.700799	0.022186
gi|472580454	RHTO_06555	aldo/keto reductase	5	5	4	4	5	4	0.32204	0.77304	1.2182	0.47752	1.428	1.2251	0.729212	0.076785
gi|472584787	RHTO_00641	aldo/keto reductase	4	6	6	4	6	6	0.511	0.78211	0.6924	0.68882	2.5225	1.8881	0.527727	0.130353
gi|472582936	RHTO_02546	aldo-keto reductase	1	3	3	1	3	3	0.5954	0.51841	0.98617	0.6968	1.8992	1.4563	0.611842	0.0805793
gi|472588702	RHTO_00602	aldo-keto reductase	1	3	3	1	3	3	1.6131	0.758	0.63849	1.7805	0.71795	0.96411	1.18972	0.183142
gi|472580313	RHTO_06671	aldose 1-epimerase	0	0	1	0	0	1	NaN	NaN	0.86065	NaN	2.3663	1.8986	0.476846	0.05219
gi|472586032	RHTO_07308	aldose 1-epimerase	3	4	1	3	4	1	0.41949	0.26533	0.48092	0.60575	2.5579	1.9068	0.470047	0.0700928
gi|472587505	RHTO_02727	alginate lyase, polysaccharide lyase family 14 protein	1	0	0	1	0	0	0.3774	NaN	NaN	0.46486	0.99988	NaN	1.39175	0.553855
gi|472587829	RHTO_03053	alkaline phosphatase	10	11	10	0	0	3	NaN	NaN	0.37107	NaN	0.47327	0.40711	1.98611	0.544837
gi|472588666	RHTO_00566	alkaline phosphatase D	4	7	4	4	7	4	0.66303	0.79083	0.77265	0.91556	1.4243	1.2788	0.731319	0.0440484
gi|472585235	RHTO_08154	allantoicase	4	5	4	4	5	4	0.64763	0.72104	0.91905	0.93542	2.9424	2.786	0.329845	0.0351842
gi|472584785	RHTO_00639	allantoinase	3	3	3	3	3	3	0.59253	0.4754	0.80725	0.73267	0.77904	0.57223	1.44636	0.261122
gi|472582849	RHTO_03439	alpha 1,2-mannosyltransferase, glycosyltransferase family 15 protein	1	2	1	1	2	1	0.62488	0.78069	1.121	0.69981	1.6146	1.5119	0.752571	0.195448
gi|472587963	RHTO_03188	alpha 1,2-mannosyltransferase, glycosyltransferase family 15 protein	1	3	2	1	3	2	0.27556	0.42247	0.43232	0.3319	1.9514	1.2365	0.561753	0.226393
gi|472586371	RHTO_06958	alpha 1,3-glucosidase, glycoside hydrolase family 31 protein	4	6	4	4	6	4	0.4354	0.48174	0.56109	0.5029	1.2034	NaN	#VALUE!	#VALUE!
gi|472585284	RHTO_07708	alpha tubulin	20	22	21	20	22	21	0.59847	0.87143	1.112	0.78675	0.86668	0.89759	1.22221	0.154143
gi|472588326	RHTO_00226	alpha,alpha-trehalase, glycoside hydrolase family 37 protein	5	11	10	5	11	10	0.72309	0.68268	0.97659	0.96655	0.46087	0.53763	2.14657	0.275664
gi|472583853	RHTO_01529	alpha,alpha-trehalose-phosphate synthase, glycosyltransferase family 20 protein	12	16	13	12	16	13	0.34074	0.33928	0.61628	0.48954	0.90307	1.1357	1.02195	0.123365
gi|472586838	RHTO_06361	alpha/beta fold family hydrolase	2	3	4	2	3	4	0.88047	0.84346	1.0369	1.1093	1.8798	1.8383	0.564526	0.0463768
gi|472581124	RHTO_05441	alpha/beta hydrolase	0	6	4	0	6	4	NaN	0.61826	0.72052	NaN	NaN	1.1699	#VALUE!	#VALUE!
gi|472583499	RHTO_02003	alpha/beta hydrolase	3	1	4	3	1	4	0.62989	NaN	0.85895	0.85355	0.93151	0.82462	1.16628	0.0803279
gi|472587340	RHTO_05019	alpha/beta hydrolase	3	3	1	3	3	1	0.50809	0.78755	1.2234	0.72653	0.89028	0.9703	1.10892	0.0722236
gi|472588072	RHTO_03297	alpha/beta hydrolase	0	2	1	0	2	1	NaN	1.0277	1.3525	NaN	1.4577	1.7493	0.617648	0.0603715
gi|472582597	RHTO_03511	alpha/beta hydrolase fold protein	6	7	6	2	2	2	0.49846	0.475	0.59462	0.68006	1.8753	1.698	0.642898	0.144407
gi|472584951	RHTO_00805	alpha/beta hydrolase fold-3 domain containing protein	1	0	0	1	0	0	1.8738	NaN	NaN	2.1463	0.90995	0.98754	1.01904	0.0769135
gi|472587991	RHTO_03216	alpha/beta hydrolase, carboxylesterase	1	3	0	1	3	0	0.93644	0.79957	NaN	1.1386	0.9744	1.161	0.97408	0.0977367
gi|472581198	RHTO_05515	alpha/beta hydrolase, epoxide hydrolase-like	1	1	1	1	1	1	0.35522	0.30622	0.42381	0.44785	0.93492	0.9945	0.99585	0.0790466
gi|472584608	RHTO_00948	alpha/beta hydrolase, epoxide hydrolase-like	1	2	1	1	2	1	0.11231	0.59871	0.64143	0.16823	1.4537	1.5282	0.656225	0.0307874
gi|472582198	RHTO_03938	alpha-1,2-mannosyltransferase (Ktr4), glycosyltransferase family 15 protein	0	1	2	0	1	2	NaN	0.9804	0.93325	NaN	1.0168	0.69716	1.18684	0.22868
gi|472588421	RHTO_00321	alpha-1,2-mannosyltransferase, glycosyltransferase family 22 protein	5	6	5	2	2	1	0.70659	0.90822	1.029	0.9322	1.2413	1.2533	0.850127	0.0838794
gi|472587465	RHTO_02687	alpha-1,3/alpha-1,6-mannosyltransferase, glycosyltransferase family 4 protein	1	1	2	0	0	1	NaN	NaN	1.0658	NaN	1.701	1.4345	0.5849	0.113731
gi|472582734	RHTO_03324	alpha-aminoadipic semialdehyde synthase	1	0	0	1	0	0	1.5555	NaN	NaN	2.029	1.2583	0.69434	1.11724	0.322747
gi|472586560	RHTO_06083	alpha-amylase, glycoside hydrolase family 13 protein	4	8	5	4	8	5	0.22139	0.33702	0.34028	0.27741	0.54518	0.54154	1.84691	0.0128132
gi|472588329	RHTO_00229	alpha-glucosidase, glycoside hydrolase family 13 protein	11	7	6	11	7	6	1.3958	2.2892	3.5921	1.8952	1.722	1.6328	0.600603	0.0173234
gi|472588713	RHTO_00613	alpha-mannosidase, glycoside hydrolase family 38 protein	7	14	10	7	14	10	0.39349	0.43321	0.47403	0.54387	1.498	1.6593	0.668884	0.0668936
gi|472587210	RHTO_04889	alpha-mannosyltransferase, glycosyltransferase family 71 protein	1	1	0	1	1	0	1.0377	1.4852	NaN	1.1658	1.6205	1.7008	0.652367	0.0875478
gi|472585323	RHTO_07747	alternative oxidase	20	29	24	20	29	24	2.1692	2.6891	2.7179	2.7735	0.42969	0.41716	2.16268	0.347367
gi|472586271	RHTO_06858	amidase	1	0	1	1	0	1	0.509	NaN	1.0772	0.70958	0.71887	NaN	1.86801	0.674487
gi|472587276	RHTO_04955	amidase	1	0	0	1	0	0	0.84991	NaN	NaN	1.022	1.141	1.0388	0.919537	0.0609703
gi|472583230	RHTO_02266	amidase family protein	3	0	2	3	0	2	0.43547	NaN	0.50474	0.52065	32.353	2.1247	0.394394	0.331989
gi|472582460	RHTO_03680	amidohydrolase family protein	3	1	2	3	1	2	0.71546	0.68473	0.55824	0.85884	NaN	1.4106	0.726372	0.0246837
gi|472586286	RHTO_06873	amidohydrolase family protein	2	1	0	2	1	0	0.40469	0.84627	NaN	0.53664	0.5468	0.96147	1.57432	0.462838
gi|472587700	RHTO_02924	amidophosphoribosyltransferase	7	8	8	7	8	8	1.4654	1.2765	1.9231	1.8559	0.91562	0.65889	1.30493	0.300908
gi|472581135	RHTO_05452	amino acid transmembrane transporter	1	0	1	1	0	1	0.75665	NaN	0.99023	1.1211	1.4619	0.82527	1.014	0.28762
gi|472582303	RHTO_03793	amino acid transmembrane transporter	0	1	0	0	1	0	NaN	0.52745	NaN	NaN	1.0017	NaN	0.780794	0.307604
gi|472582679	RHTO_03593	amino acid transmembrane transporter	7	8	9	3	5	4	1.0197	1.6367	1.3908	1.2945	1.1477	0.90122	0.959903	0.130373
gi|472583792	RHTO_01882	amino acid transporter	1	0	2	1	0	2	NaN	NaN	0.5041	NaN	1.2721	0.84703	0.980136	0.197325
gi|472587463	RHTO_02685	amino-acid N-acetyltransferase subunit Mak10	1	0	1	1	0	1	0.93566	NaN	NaN	1.1257	1.6227	0.86106	0.795457	0.316903
gi|472583084	RHTO_02352	aminoacylase 1-like protein 2	2	2	3	1	1	1	0.47195	0.53152	0.63813	0.66033	2.3311	1.7436	0.54534	0.105138
gi|472587232	RHTO_04911	aminoacyl-tRNA ligase	2	1	3	2	1	3	1.3387	1.8199	1.6498	1.5566	2.362	1.7495	0.502542	0.0746275
gi|472584014	RHTO_01690	aminocarboxymuconate-semialdehyde decarboxylase	3	3	1	3	3	1	0.92436	1.0575	0.81771	1.1475	1.7002	1.4528	0.674365	0.0801358
gi|472585087	RHTO_08006	aminoglycoside phosphotransferase	3	3	4	1	1	2	0.33699	0.4769	0.51577	0.47352	NaN	1.3188	0.694073	0.0907808
gi|472584033	RHTO_01709	aminomethyltransferase	5	11	9	5	11	9	0.63579	0.81367	0.80697	0.77142	0.94641	1.4157	0.910786	0.182331
gi|472586434	RHTO_07021	aminomethyltransferase	3	4	5	1	1	2	0.68473	0.7979	1.0275	0.89194	1.9549	1.4758	0.554341	0.108391
gi|472588396	RHTO_00296	aminopeptidase 2	32	39	41	32	39	41	1.076	1.0342	1.362	1.4056	1.6075	0.67215	0.898066	0.511041
gi|472581820	RHTO_04309	aminotransferase, class V/Cysteine desulfurase	8	7	8	3	2	2	0.93496	0.74442	0.94475	1.1931	1.0963	0.8668	0.983934	0.147576
gi|472586387	RHTO_06974	aminotransferase, classes I and II	1	0	1	1	0	1	0.57578	NaN	0.47038	0.7192	1.8033	1.6658	0.602091	0.0484667
gi|472584956	RHTO_00810	AMP deaminase	2	4	4	2	4	4	0.3869	0.98074	0.7096	0.44577	1.0201	1.032	1.14622	0.297237
gi|472584249	RHTO_01502	amyloid beta precursor protein binding protein 1	3	2	3	3	2	3	0.61205	0.83433	0.86344	0.80927	1.4394	0.97358	0.678519	0.357002
gi|472588480	RHTO_00380	AN2-type zinc finger protein	2	1	1	2	1	1	0.65877	0.68975	0.86283	0.83395	1.0098	1.0491	0.991314	0.038636
gi|472582930	RHTO_02540	anaphase-promoting complex component Cut20/Apc4	1	0	0	1	0	0	0.33917	NaN	NaN	0.45564	NaN	1.2742	0.560997	0.316513
gi|472580967	RHTO_05658	Ankyrin repeat containing protein	3	2	2	3	2	2	0.65492	0.69017	1.019	0.88029	2.051	1.4112	0.600126	0.110581
gi|472588142	RHTO_00042	Ankyrin repeat protein	8	6	10	2	0	2	NaN	NaN	1.848	NaN	1.146	1.5074	0.63285	0.256391
gi|472588486	RHTO_00386	ankyrin repeat protein	1	1	1	1	1	1	0.88561	2.1471	0.67081	1.225	3.4781	2.1239	0.330447	0.124595
gi|472585339	RHTO_07763	anthranilate phosphoribosyltransferase	2	5	5	0	1	1	NaN	2.1137	1.9617	NaN	1.2957	2.2707	0.595729	0.166664
gi|472582954	RHTO_02564	anthranilate synthase	14	13	15	14	13	15	1.2532	1.5065	1.7214	1.6446	1.2671	1.5645	0.766059	0.117034
gi|472587508	RHTO_02730	anthranilate synthase component I	6	8	8	6	8	8	1.2693	1.9171	1.7438	1.6136	2.0403	2.1708	0.377449	0.17028
gi|472584634	RHTO_00974	antibiotic biosynthesis monooxygenase	3	3	3	1	0	1	0.43116	NaN	1.1495	0.4573	1.3035	1.5537	0.748528	0.0969378
gi|472584367	RHTO_01176	antibiotic biosynthesis monooxygenase domain containing protein	3	3	3	3	3	3	0.47366	0.53958	1.0512	0.6497	2.0499	1.9936	0.506665	0.0218105
gi|472580696	RHTO_05871	antiviral helicase SKI2	1	2	1	1	2	1	1.671	1.003	0.85098	1.9092	1.6266	1.3774	0.66328	0.0569611
gi|472586171	RHTO_06758	antiviral protein SKI3	5	2	3	2	2	3	0.76276	1.5064	0.91034	1.0101	0.44942	0.40964	2.0701	0.468214
gi|472584838	RHTO_00692	anucleate primary sterigmata protein A	1	0	2	1	0	2	NaN	NaN	1.0582	NaN	1.5952	0.69889	1.03571	0.402155
gi|472581761	RHTO_04250	anucleate primary sterigmata protein b	5	3	3	5	3	3	0.46014	0.50191	0.71041	0.5927	NaN	0.63443	1.88527	0.437071
gi|472584243	RHTO_01496	AP-1 complex subunit gamma-1	9	12	11	9	12	11	0.76923	0.99319	1.1529	0.99004	0.90863	NaN	1.24526	0.204645
gi|472584381	RHTO_01190	AP-2 complex subunit alpha	5	7	8	5	7	8	0.63498	0.75338	1.4726	0.8761	0.32777	0.48236	1.90788	1.23399
gi|472586417	RHTO_07004	AP-2 complex subunit beta	2	2	1	2	2	1	1.0693	0.85723	0.89208	1.5307	1.0639	0.58675	1.42269	0.420006
gi|472581968	RHTO_04211	AP-2 complex subunit sigma	3	3	2	3	3	2	0.78777	1.248	1.378	0.99638	NaN	NaN	#VALUE!	#VALUE!
gi|472584052	RHTO_01728	AP-3 complex subunit beta-2	1	3	0	1	3	0	NaN	0.85329	NaN	NaN	0.46531	NaN	1.64789	0.708819
gi|472588205	RHTO_00105	AP-3 complex subunit delta-1	1	3	2	1	3	2	3.2539	1.9627	1.217	3.7176	0.44952	0.75675	1.81143	0.456452
gi|472587935	RHTO_03160	a-pheromone processing metallopeptidase ste23	4	5	5	4	5	5	1.3494	1.4572	1.2842	1.7304	0.85219	0.63402	1.30288	0.237722
gi|472587970	RHTO_03195	a-pheromone processing metallopeptidase ste23	1	1	0	1	1	0	0.6588	0.97591	NaN	0.95076	0.62363	0.68467	1.52252	0.0733544
gi|472582522	RHTO_03742	apolipoprotein O	6	7	8	6	7	8	1.4889	1.168	1.2224	2.0513	0.92489	0.75139	1.24751	0.144017
gi|472584465	RHTO_01274	apoptosis regulator	3	3	2	3	3	2	0.39285	0.48703	0.69721	0.51528	NaN	NaN	#VALUE!	#VALUE!
gi|472586799	RHTO_06322	apoptosis related protein	8	5	8	8	5	8	0.49408	0.61088	0.65333	0.71199	2.6547	3.3864	0.29827	0.0769775
gi|472581679	RHTO_04403	Arf GTPase activating protein	2	1	1	2	1	1	0.78309	NaN	1.404	1.0039	0.6221	0.58669	1.87067	0.375021
gi|472580662	RHTO_05977	ARF guanyl-nucleotide exchange factor	0	2	2	0	2	2	NaN	0.78207	2.1975	NaN	1.6051	0.5364	1.19357	0.626665
gi|472581479	RHTO_05160	arginase	2	3	3	2	3	3	1.1248	0.96803	1.3511	1.5398	1.0114	1.2424	0.957124	0.139146
gi|472581019	RHTO_05710	arginine N-methyltransferase	5	3	4	3	1	2	1.143	1.7447	1.3295	1.4066	0.21824	0.35463	3.14655	1.30329
gi|472588658	RHTO_00558	argininosuccinate lyase	16	19	18	16	19	18	1.0051	1.6037	1.6608	1.4306	0.73014	0.95795	1.20675	0.230308
gi|472581466	RHTO_05147	argininosuccinate synthase	20	20	20	20	20	20	1.3409	1.4919	1.9668	1.8785	NaN	0.66842	#VALUE!	#VALUE!
gi|472587449	RHTO_02671	arginyl-tRNA synthetase	19	23	21	19	23	21	1.6489	1.2173	2.0523	2.0161	1.0026	NaN	0.958136	0.0555379
gi|472580931	RHTO_05622	ariadne-1	5	3	3	5	3	3	0.64359	0.48047	0.69081	0.78483	0.47715	NaN	1.55061	0.770985
gi|472583875	RHTO_01551	ARID/BRIGHT DNA-binding domain containing protein	1	1	1	1	1	1	0.68967	1.2956	0.95642	0.91101	1.0446	1.3277	0.996223	0.264656
gi|472584331	RHTO_01140	Armadillo repeat containing protein	22	21	20	5	5	4	0.58232	0.68766	0.86654	0.75891	1.3475	1.8761	0.687388	0.13556
gi|472584520	RHTO_00860	Armadillo-type fold containing protein	1	1	1	1	1	1	0.55274	NaN	1.2883	0.72061	0.26679	0.29591	3.56384	0.260824
gi|472582275	RHTO_03765	Armadillo-type fold domain containing protein	5	5	3	2	0	0	0.64106	0.91358	1.1547	0.86469	1.4766	1.3614	0.705885	0.0405218
gi|472583439	RHTO_01942	Armadillo-type fold domain containing protein	2	4	3	2	4	3	0.40995	2.3007	1.4033	0.51821	1.1407	1.3234	0.734495	0.15382
gi|472584303	RHTO_01111	Armadillo-type fold domain containing protein	1	1	2	1	1	2	1.019	1.7954	1.5789	1.3746	1.0317	2.0527	0.728219	0.340904
gi|472586422	RHTO_07009	Armadillo-type fold domain containing protein	1	4	1	1	4	1	0.61101	0.81452	0.55101	0.7965	0.33452	0.53482	2.05234	0.860391
gi|472586447	RHTO_07034	aromatic amino acid aminotransferase I	3	4	4	3	4	4	3.6861	3.3283	3.758	4.9679	0.96709	NaN	1.88261	1.20008
gi|472588243	RHTO_00143	aromatic amino acid aminotransferase I	4	3	3	4	3	3	0.70366	0.53846	1.218	0.88112	0.6661	NaN	1.59689	0.13522
gi|472581322	RHTO_05438	aromatic ring-opening dioxygenase	2	2	3	2	2	3	0.62171	0.55828	0.76485	0.81821	2.5173	NaN	0.785253	0.548717
gi|472587476	RHTO_02698	aromatic-L-amino-acid decarboxylase	2	3	3	2	3	3	0.45374	0.92432	1.2224	0.59751	NaN	NaN	#VALUE!	#VALUE!
gi|472582846	RHTO_03436	arp2/3 complex 16 kDa subunit	5	5	6	5	5	6	0.59135	0.83337	1.2596	0.75195	0.13132	0.18027	5.376	2.32933
gi|472586704	RHTO_06227	arp2/3 complex 20 kDa subunit	3	5	6	3	5	6	1.0507	1.3074	1.2341	1.3293	0.728	0.58214	1.30825	0.445842
gi|472580452	RHTO_06553	arp2/3 complex 21 kda subunit	2	3	3	2	3	2	0.38421	1.0659	3.0114	0.46705	0.85059	NaN	1.19613	0.0289558
gi|472580561	RHTO_06393	arp2/3 complex 34 kda subunit	12	11	9	12	11	9	0.7245	0.70055	0.79731	0.82745	0.75238	0.76276	1.37234	0.0909876
gi|472586646	RHTO_06169	arrestin/PY protein 1	2	8	7	2	8	7	1.0569	1.1331	1.2826	1.3777	1.0435	1.7109	0.73581	0.196816
gi|472580378	RHTO_06626	Arrestin-like, N-terminal and Immunoglobulin E-set domain protein	2	3	2	2	3	2	0.40493	0.59315	1.3668	0.48362	0.59548	0.41112	2.02737	0.379749
gi|472585131	RHTO_08050	arsenite transmembrane-transporting ATPase	6	6	8	6	6	8	0.79125	0.96966	1.0209	1.1871	0.57416	0.60559	1.70319	0.0466684
gi|472582647	RHTO_03561	arsenite-resistance protein 2	5	3	4	2	1	0	0.59143	0.96261	NaN	0.7856	1.824	1.9029	0.56881	0.0564611
gi|472582996	RHTO_02606	arylacetamide deacetylase	0	2	1	0	2	1	NaN	0.6062	0.77948	NaN	1.0668	0.52184	1.2643	0.564643
gi|472581892	RHTO_04135	arylacetamide deacetylase-like 2	6	5	5	6	5	5	0.3774	0.25914	0.27855	0.55921	1.8528	1.8868	0.700777	0.287417
gi|472580647	RHTO_05962	aryl-alcohol dehydrogenase	0	3	2	0	3	2	NaN	1.6289	1.111	NaN	0.77516	0.91724	1.3363	0.272155
gi|472587851	RHTO_03075	aryl-alcohol dehydrogenase	5	8	7	5	8	7	0.56047	0.81339	1.2942	0.71711	NaN	NaN	#VALUE!	#VALUE!
gi|472584259	RHTO_01512	arylalkylamine N-acetyltransferase	5	5	4	5	5	4	1.5555	1.1945	1.4062	1.9004	0.25296	0.46149	2.69107	1.09824
gi|472583093	RHTO_02361	arylesterase / paraoxonase	6	5	4	6	5	4	0.54874	0.69495	0.74779	0.68463	1.6686	1.0016	0.793577	0.199758
gi|472582523	RHTO_03743	ASF1-like histone chaperone	2	3	3	2	3	3	0.41825	0.9416	0.95749	0.54522	1.0682	1.3637	0.890727	0.140341
gi|472587537	RHTO_02759	asparagine synthase (glutamine-hydrolyzing)	23	20	24	4	4	5	1.0989	1.2664	1.6154	1.4746	1.4204	1.2912	0.710499	0.0609961
gi|472584711	RHTO_01051	asparaginyl-trna synthetase	21	20	22	21	20	22	1.0413	1.3095	1.4923	1.4901	1.4532	1.6685	0.634035	0.0474726
gi|472586898	RHTO_04575	asparaginyl-trna synthetase	15	14	12	15	14	12	1.2139	2.3663	2.0914	1.5218	0.57897	0.35851	2.08981	0.60593
gi|472586077	RHTO_07353	aspartate aminotransferase	7	6	8	7	6	8	1.1276	1.9205	1.5715	1.6069	NaN	1.8329	#VALUE!	#VALUE!
gi|472588525	RHTO_00425	aspartate aminotransferase, cytoplasmic	13	11	14	13	11	14	0.67805	0.6796	1.0572	0.8779	0.9591	NaN	0.969833	0.10297
gi|472586224	RHTO_06811	aspartate-semialdehyde dehydrogenase	15	15	14	15	15	14	1.5185	2.1205	1.9309	2.0212	NaN	0.99713	#VALUE!	#VALUE!
gi|472582704	RHTO_03618	aspartic-type endopeptidase	1	1	0	1	1	0	0.4603	0.94155	NaN	0.56073	2.0794	2.1866	0.465736	0.013165
gi|472588662	RHTO_00562	aspartic-type endopeptidase	1	2	3	1	2	3	0.60054	0.41525	0.44899	0.71992	1.9753	0.58917	1.10178	0.8422
gi|472581069	RHTO_05571	aspartyl aminopeptidase	8	10	13	8	10	13	1.0278	1.0991	1.4023	1.4087	0.66672	0.70175	1.55952	0.172261
gi|472583172	RHTO_02442	aspartyl/glutamyl-tRNA(Asn/Gln) amidotransferase subunit B	7	8	7	7	8	7	2.4112	2.5906	2.7838	3.4395	0.73836	0.8863	1.20954	0.125725
gi|472584952	RHTO_00806	aspartyl-tRNA synthetase	1	2	2	1	2	2	0.60069	0.71882	0.64071	0.76459	1.2331	1.3788	0.768116	0.0605961
gi|472587361	RHTO_05040	aspartyl-tRNA(Asn)/glutamyl-tRNA (Gln) amidotransferase subunit A	3	1	3	3	1	3	0.82072	1.4841	1.6941	1.0236	1.2153	0.48114	1.17684	0.786745
gi|472583897	RHTO_01573	aspartyl-tRNA(Asn)/glutamyl-tRNA (Gln) amidotransferase subunit B	1	3	4	1	3	4	2.1436	1.5466	1.3749	2.7467	0.62262	0.52609	1.65673	0.223121
gi|472582467	RHTO_03687	atp binding domain containing protein	0	1	0	0	1	0	NaN	0.9349	NaN	NaN	1.1564	1.5483	0.744197	0.111122
gi|472588516	RHTO_00416	ATP binding protein	2	2	2	2	2	2	0.51926	0.77589	0.87512	0.71494	5.4102	1.151	0.640416	0.394545
gi|472582176	RHTO_03915	ATP citrate synthase	56	57	58	56	57	58	0.3201	0.37914	0.51864	0.41496	0.76373	0.86886	1.28588	0.124875
gi|472585326	RHTO_07750	ATP phosphoribosyltransferase	8	9	10	8	9	10	0.74645	0.75585	1.2493	0.92763	NaN	NaN	#VALUE!	#VALUE!
gi|472581684	RHTO_04408	ATP sulfate adenylyltransferase	26	23	25	26	23	25	1.197	1.695	2.1654	1.6191	1.1846	0.99485	0.988414	0.136639
gi|472587982	RHTO_03207	ATP synthase beta chain, mitochondrial precursor	4	2	3	0	0	0	NaN	NaN	1.2301	NaN	1.189	1.0006	1.13574	0.381598
gi|472586451	RHTO_07038	ATP synthase D chain, mitochondrial	9	11	9	9	11	9	0.61871	0.673	0.84266	0.82465	1.0368	0.82139	1.13363	0.146471
gi|472586525	RHTO_06048	ATP synthase gamma chain	16	13	13	16	13	13	0.63888	0.74626	0.91159	0.85258	0.57962	0.989	1.50527	0.428801
gi|472586753	RHTO_06276	ATP synthase mitochondrial F1 complex assembly factor 1	5	4	6	5	4	6	1.2485	1.4562	2.1364	1.6799	1.1838	0.89204	1.013	0.147664
gi|472587687	RHTO_02911	ATP synthase mitochondrial f1 complex assembly factor 2	3	4	7	3	4	7	1.0381	1.5124	1.6386	1.2399	0.6153	NaN	1.37457	0.354481
gi|472581703	RHTO_04427	ATP synthase oligomycin sensitivity conferral	15	16	16	15	16	16	0.83924	0.80796	1.2104	1.0576	1.2318	0.50261	1.40072	0.832826
gi|472580957	RHTO_05648	ATP synthase subunit alpha	26	28	26	22	25	24	0.75063	0.82787	1.179	0.96652	0.42638	0.35082	2.59384	0.252667
gi|472587981	RHTO_03206	ATP synthase subunit beta	27	25	24	23	23	22	0.8545	0.77276	1.0369	1.096	0.81138	0.71679	1.31384	0.0813204
gi|472584996	RHTO_00850	ATPase assembly factor ATP10	6	6	4	6	6	4	1.3365	1.3599	1.4501	1.5964	NaN	0.52767	#VALUE!	#VALUE!
gi|472585383	RHTO_07807	ATPase, AAA-type domain containing protein	3	3	1	3	3	1	0.68743	0.82281	0.73113	0.87515	0.19678	0.72645	3.15756	1.85678
gi|472587373	RHTO_05052	ATPase, AFG1-like	4	5	3	4	5	3	0.81635	1.1157	1.2207	1.0561	1.0012	1.0904	0.859793	0.17485
gi|472588278	RHTO_00178	ATPase, F0 complex, subunit E, mitochondrial	7	6	6	2	2	1	1.7839	1.538	1.4252	2.129	0.55463	0.67626	1.70896	0.200503
gi|472584524	RHTO_00864	ATP-binding cassette transporter	4	6	7	4	6	7	0.70052	1.1325	0.70715	0.89542	1.4182	1.6993	0.698079	0.106257
gi|472584894	RHTO_00748	ATP-binding cassette, subfamily B (MDR/TAP), member 1	4	5	6	4	5	6	0.42626	0.45167	0.56848	0.53767	6.3267	2.8406	0.305987	0.131114
gi|472586499	RHTO_06022	ATP-binding cassette, sub-family E, member 1	14	15	17	14	15	17	1.3119	1.5936	1.9467	1.643	0.66944	0.81096	1.69079	0.581772
gi|472584314	RHTO_01122	ATP-binding cassette, sub-family F, member 2	27	27	26	27	27	26	1.1194	1.3759	1.8022	1.3579	0.87776	0.73952	1.37762	0.25201
gi|472583706	RHTO_01796	ATP-binding cassette, sub-family F, member 3	8	10	8	8	10	8	0.99521	1.497	1.8306	1.3297	1.035	NaN	1.53479	0.804136
gi|472582126	RHTO_04120	ATP-binding cassette, subfamily G (WHITE), member 2	1	1	2	1	1	2	0.45191	0.34954	0.42495	0.56702	0.76547	0.58594	1.62922	0.291926
gi|472583720	RHTO_01810	ATP-binding cassette, subfamily G (WHITE), member 2, PDR	2	1	0	2	1	0	0.35221	0.57705	NaN	0.42645	0.84429	0.57893	1.6239	0.397967
gi|472587174	RHTO_04853	ATP-binding protein involved in chromosome partitioning, MRP	0	1	1	0	1	1	NaN	0.89301	0.97348	NaN	0.56032	0.56307	1.51092	0.466655
gi|472582256	RHTO_03996	ATP-dependent Clp protease ATP-binding subunit ClpX	4	2	3	4	2	3	1.113	24.516	2.3484	1.4671	0.44127	0.52152	2.09183	0.246578
gi|472583581	RHTO_02085	ATP-dependent Clp protease, protease subunit	1	0	1	1	0	1	1.1034	NaN	1.5008	1.3444	0.56407	NaN	#VALUE!	#VALUE!
gi|472586491	RHTO_06014	ATP-dependent DNA helicase 2 subunit 1	1	1	1	1	1	1	0.45972	0.44349	0.86343	0.53936	1.3008	0.53869	1.10023	0.656477
gi|472588298	RHTO_00198	ATP-dependent DNA helicase 2 subunit 2	0	4	2	0	4	2	NaN	0.87788	0.70538	NaN	0.75324	0.8442	1.34719	0.173269
gi|472586536	RHTO_06059	ATP-dependent DNA helicase Hrp3	6	8	6	6	8	6	0.70521	1.2801	1.036	0.87243	NaN	0.63572	1.9318	0.507394
gi|472586619	RHTO_06142	ATP-dependent helicase	2	3	0	2	3	0	1.5811	0.94479	NaN	1.7753	NaN	3.5965	0.376396	0.139085
gi|472587661	RHTO_02885	ATP-dependent helicase NAM7	5	4	7	5	4	6	0.92039	1.0572	0.95923	1.1126	0.98653	0.90615	1.04323	0.0522571
gi|472585019	RHTO_07938	ATP-dependent helicase STH1/SNF2	6	7	9	6	7	9	0.75393	1.0614	0.87173	1.027	0.69064	0.87119	1.2321	0.188406
gi|472587738	RHTO_02962	ATP-dependent metalloendopeptidase	6	5	8	6	5	8	1.2643	1.2075	0.84673	1.6427	0.90423	0.87664	1.13063	0.0215234
gi|472582842	RHTO_03432	ATP-dependent RNA helicase A	17	19	23	2	4	4	1.3112	2.0371	1.6821	1.5785	0.19704	0.17209	5.64704	0.510133
gi|472586496	RHTO_06019	ATP-dependent rna helicase dbp10	3	3	3	3	3	3	1.471	1.7836	1.9153	1.9506	0.30309	0.29818	2.99477	0.575244
gi|472585569	RHTO_07462	ATP-dependent rna helicase dbp2	13	17	13	12	16	12	1.0649	1.6288	1.5088	1.3394	0.70813	0.68625	1.65876	0.38876
gi|472583596	RHTO_02100	ATP-dependent rna helicase dbp4	2	1	3	2	1	3	1.1463	NaN	1.2964	1.5876	0.65375	0.70026	1.51637	0.0824936
gi|472587000	RHTO_04678	ATP-dependent rna helicase dbp5	7	7	8	7	7	8	0.7369	0.88711	1.4768	1.0316	0.4999	1.1662	1.42894	0.808162
gi|472584559	RHTO_00899	ATP-dependent rna helicase dbp7	3	7	3	3	7	3	1.6824	1.801	1.8487	2.1102	1.3269	1.0831	0.916575	0.159693
gi|472580676	RHTO_05991	ATP-dependent rna helicase dbp9	3	4	1	3	4	1	1.4167	1.3805	0.75701	1.7113	0.8277	0.63658	1.75919	0.665455
gi|472588695	RHTO_00595	ATP-dependent RNA helicase DDX41	5	4	3	5	4	3	0.7823	0.93335	0.81357	1.1287	1.1333	0.89769	0.944436	0.148567
gi|472587063	RHTO_04741	ATP-dependent rna helicase ded1	21	24	25	20	23	24	1.1726	1.6286	1.7326	1.5351	0.99981	0.82415	1.10882	0.106649
gi|472584868	RHTO_00722	ATP-dependent rna helicase dhh1	8	12	12	1	1	1	0.53454	0.94616	1.1537	0.67142	0.94056	0.97158	1.05317	0.0208013
gi|472588573	RHTO_00473	ATP-dependent RNA helicase DHX36	1	1	2	1	1	2	2.4647	1.2451	0.91535	3.1879	NaN	0.30964	2.23637	1.40458
gi|472582078	RHTO_04072	ATP-dependent rna helicase dhx8	9	11	9	9	11	9	0.79359	0.85901	1.0606	0.97045	0.69228	NaN	#VALUE!	#VALUE!
gi|472585506	RHTO_07399	ATP-dependent rna helicase dhx8	1	0	1	1	0	1	2.08	NaN	1.3114	2.9657	NaN	0.72041	#VALUE!	#VALUE!
gi|472584253	RHTO_01506	ATP-dependent rna helicase dob1	6	8	12	6	8	12	1.2077	1.7184	1.5472	1.6551	8.3154	6.8248	0.250458	0.203189
gi|472587124	RHTO_04802	ATP-dependent rna helicase drs1	1	3	1	1	3	1	2.4621	0.97693	1.3946	2.7582	0.73682	0.56213	1.35113	0.430874
gi|472584442	RHTO_01251	ATP-dependent rna helicase has1	6	9	7	6	9	7	2.8008	2.8303	2.2299	4.2919	0.97798	0.84796	1.0744	0.0908473
gi|472581801	RHTO_04290	ATP-dependent rna helicase rok1	3	2	1	1	0	0	1.2737	0.92393	2.0491	1.7391	2.6044	2.7012	0.385529	0.0161611
gi|472583176	RHTO_02446	ATP-dependent rna helicase sub2	25	22	22	25	22	22	0.91919	1.1479	1.735	1.1497	2.8562	2.8966	0.362722	0.0261788
gi|472587123	RHTO_04801	ATP-dependent rna helicase suv3	3	7	8	2	7	7	4.0318	1.7034	2.2863	5.5077	NaN	0.92249	2.29948	1.71892
gi|472587796	RHTO_03020	ATP-dependent RNA helicase, EIF4A3	13	12	10	12	11	8	0.81622	1.2894	1.6702	1.1979	0.20361	0.32734	3.80931	0.975822
gi|472581229	RHTO_05345	ATP-dependent rrna helicase rrp3	12	16	15	2	2	2	1.5238	1.8287	2.136	1.8848	0.46156	0.60685	1.96218	0.276278
gi|472583684	RHTO_01774	ATP-dependent rrna helicase rrp3	1	3	2	1	3	2	1.1671	1.2899	1.6334	1.5407	1.1248	1.2606	0.869759	0.0688971
gi|472586534	RHTO_06057	ATP-synthase delta chain	2	2	1	2	2	1	0.50844	0.38614	0.37148	0.64765	0.65488	0.81459	1.51757	0.285365
gi|472582500	RHTO_03720	BAR adaptor protein	1	1	2	1	1	2	0.40585	0.36744	0.70174	0.52959	4.8819	2.5559	0.528599	0.410065
gi|472585185	RHTO_08104	BAR adaptor protein	7	11	8	7	11	8	0.67839	0.7172	0.73368	0.86358	1.0482	1.0639	1.21206	0.459188
gi|472586043	RHTO_07319	BAR adaptor protein Hob3	6	7	8	6	7	8	0.44359	0.47621	0.69433	0.66512	0.76204	0.91688	1.26856	0.160577
gi|472581089	RHTO_05591	BAR domain protein	11	10	12	1	2	2	0.61432	0.73427	0.77186	0.75163	1.198	1.1274	0.840403	0.0440297
gi|472581673	RHTO_04397	bax inhibitor family protein	1	0	0	1	0	0	0.4397	NaN	NaN	0.64554	1.1381	1.0095	0.92387	0.0589837
gi|472583653	RHTO_01743	bax inhibitor family protein	2	1	1	2	1	1	3.5565	2.7411	3.6615	4.4879	1.111	1.1564	0.84598	0.0655452
gi|472582498	RHTO_03718	B-block binding subunit of TFIIIC family protein	2	4	2	2	4	2	0.38669	0.56459	0.69426	0.43477	2.3634	2.2876	0.625296	0.338112
gi|472582767	RHTO_03357	B-cell receptor-associated protein 31	4	4	3	4	4	3	0.74343	1.3339	0.52027	0.91457	0.8406	1.5733	1.0251	0.338661
gi|472585100	RHTO_08019	BDF1	7	5	6	7	5	6	0.72059	0.97695	1.3708	0.92786	1.1617	1.0163	1.11449	0.338392
gi|472585307	RHTO_07731	benzodiazepine receptor family protein	1	3	2	1	3	2	0.3589	0.21323	0.38206	0.49075	1.4524	1.7451	0.593739	0.0863065
gi|472584962	RHTO_00816	Bestrophin/UPF0187 family protein	0	1	1	0	1	1	NaN	0.62384	0.8775	NaN	0.2159	0.089061	10.0801	4.97461
gi|472584165	RHTO_01418	bet1-like protein	0	0	2	0	0	2	NaN	NaN	0.67989	NaN	NaN	0.84289	#VALUE!	#VALUE!
gi|472584384	RHTO_01193	bet3 family protein	2	2	1	2	2	1	0.84232	0.94211	NaN	1.0883	1.3369	1.6928	0.717358	0.11442
gi|472585057	RHTO_07976	bet3 family protein	1	1	0	1	1	0	0.79185	0.51234	NaN	0.99459	0.88981	0.70791	1.28122	0.146132
gi|472584150	RHTO_01403	beta subunit of the sec61p er translocation complex (sec61p-sss1p-sbh1p)	3	1	1	3	1	1	0.62058	0.84823	1.3425	0.78236	0.60418	0.38349	1.86477	0.663364
gi|472581021	RHTO_05712	beta-1,3-mannanase	2	1	1	2	1	1	0.8332	1.065	1.7187	1.2706	1.0766	1.3831	0.737961	0.183872
gi|472585182	RHTO_08101	beta-1,4-mannosyltransferase, glycosyltransferase family 33 protein	1	2	1	0	1	0	NaN	0.28043	0.33971	NaN	NaN	NaN	#VALUE!	#VALUE!
gi|472585780	RHTO_07673	beta-ala-his dipeptidase	0	1	2	0	1	2	NaN	1.3159	1.3738	NaN	0.61318	0.42826	2.15433	0.460544
gi|472580443	RHTO_06544	beta-catenin-like protein 1	4	6	4	4	6	4	1.2336	1.0559	1.4917	1.7507	1.1008	0.72949	1.13963	0.326959
gi|472588141	RHTO_00041	beta-cyano-L-alanine hydratase/nitrilase (partial sequence n rerminus)	0	2	1	0	2	1	NaN	0.91492	2.1288	NaN	0.81049	0.83804	1.26829	0.0969736
gi|472580862	RHTO_05732	beta-flanking protein	1	1	1	1	1	1	0.55782	0.24696	0.50583	0.77049	1.6992	1.038	0.744538	0.195177
gi|472581305	RHTO_05421	beta-fructofuranosidase, glycoside hydrolase family 32 protein	1	1	1	1	1	1	0.28229	0.85259	NaN	0.36614	NaN	0.91665	#VALUE!	#VALUE!
gi|472580333	RHTO_06637	beta-glucosidase, glycoside hydrolase family 3 protein	1	1	0	1	1	0	0.50612	0.60985	NaN	0.59084	1.2907	2.181	0.623936	0.158638
gi|472581079	RHTO_05581	beta-glucosidase, glycoside hydrolase family 3 protein	4	1	0	3	1	0	0.69633	2.3394	NaN	0.85233	1.412	0.56616	1.23725	0.748168
gi|472581080	RHTO_05582	beta-glucosidase, glycoside hydrolase family 3 protein	6	0	0	5	0	0	0.69149	NaN	NaN	0.9532	0.81887	1.6611	0.911603	0.437829
gi|472582735	RHTO_03325	betaine lipid synthase	13	9	8	1	1	1	0.23653	0.1296	0.19055	0.33718	1.6228	1.2853	0.769944	0.149846
gi|472581060	RHTO_05562	beta-keto reductase	3	5	6	3	5	6	0.87493	0.66986	0.5504	1.2	1.678	1.2958	0.698191	0.0913378
gi|472587510	RHTO_02732	beta-lactamase-like protein 2	1	3	0	1	3	0	0.64135	0.80761	NaN	0.82196	1.3037	1.0485	0.899213	0.11504
gi|472586813	RHTO_06336	beta-tubulin	12	15	16	12	14	14	0.51927	0.67501	0.84659	0.6771	1.1355	1.0464	1.03217	0.200989
gi|472587385	RHTO_05064	beta-tubulin	12	13	16	9	8	8	1.1008	0.9319	1.6315	1.5046	1.4278	NaN	#VALUE!	#VALUE!
gi|472585351	RHTO_07775	bifunctional fatty acid transporter/acyl-CoA synthetase	8	9	5	8	9	5	0.36987	0.52788	0.45456	0.50751	1.256	1.4597	0.861668	0.216887
gi|472586864	RHTO_06387	binuclear zinc transcription factor	6	5	6	3	3	4	0.42134	0.48112	0.66474	0.58254	2.2442	1.1465	0.573924	0.259169
gi|472588305	RHTO_00205	biotin synthase	11	12	15	0	0	1	1.286	1.5894	2.1584	1.5806	0.78931	0.71407	1.51257	0.316955
gi|472583398	RHTO_02161	biotin-[acetyl-CoA-carboxylase] ligase	1	3	2	1	3	2	0.85941	0.95007	0.56383	1.0647	0.50754	0.44772	2.09438	0.132271
gi|472585981	RHTO_07257	bis(5'-adenosyl)-triphosphatase	2	1	1	2	1	1	0.82711	1.8188	1.9934	0.96842	NaN	4.3005	0.956545	1.02391
gi|472587134	RHTO_04812	bis(5'-adenosyl)-triphosphatase	3	3	3	3	3	3	0.44102	0.70198	1.0197	0.61402	NaN	0.37611	#VALUE!	#VALUE!
gi|472583692	RHTO_01782	bis(5'-nucleosyl)-tetraphosphatase	1	0	1	1	0	1	0.60794	NaN	NaN	0.80682	2.2834	NaN	0.692457	0.359936
gi|472586822	RHTO_06344	blue-light-inducible Bli-3 protein	3	7	6	3	7	6	0.39845	0.20785	0.50684	0.512	1.3118	0.72298	0.976494	0.352354
gi|472586315	RHTO_06902	BolA domain protein	3	3	2	3	3	2	1.0456	1.39	1.1068	1.2771	1.0019	1.2734	0.943976	0.139712
gi|472588643	RHTO_00543	BolA family protein	2	1	3	2	1	3	0.86715	0.815	1.6093	0.99728	1.249	0.90283	0.944932	0.154319
gi|472586389	RHTO_06976	branched-chain amino acid aminotransferase	11	16	15	11	16	15	1.0596	1.1241	1.4775	1.5314	0.78669	0.7685	1.14489	0.245201
gi|472585126	RHTO_08045	branched-chain-amino-acid aminotransferase	10	11	9	10	11	9	1.1498	1.098	1.9148	1.627	1.351	1.4223	0.778314	0.099901
gi|472581957	RHTO_04200	BRCA1-associated protein	3	2	1	3	2	1	0.45856	0.50957	0.32736	0.57048	1.1255	1.0115	0.949553	0.0535651
gi|472586802	RHTO_06325	BRCT domain protein Brc1	0	0	2	0	0	2	NaN	NaN	2.029	NaN	0.81443	0.56146	1.53739	0.282429
gi|472584307	RHTO_01115	breast carcinoma amplified sequence 2	4	2	1	4	2	1	0.77955	0.76305	NaN	1.1148	NaN	0.95713	#VALUE!	#VALUE!
gi|472581981	RHTO_04224	Brefeldin A sensitivity protein-related, DUF2421 containing protein	1	0	1	1	0	1	NaN	NaN	1.0033	NaN	1.497	1.6972	0.628604	0.0557178
gi|472583270	RHTO_02308	Bromodomain and PHD finger domain containing protein 3	1	1	1	1	1	1	1.9062	1.6529	2.2748	2.1788	0.6803	0.61838	1.4921	0.115551
gi|472585369	RHTO_07793	Bromodomain-containing protein	0	1	2	0	1	2	NaN	1.7506	0.56888	NaN	NaN	4.0624	#VALUE!	#VALUE!
gi|472580449	RHTO_06550	BSD domain protein	25	34	28	7	11	8	0.46645	0.54626	0.73401	0.57023	1.1646	1.1556	0.922946	0.105601
gi|472586391	RHTO_06978	bud emergence protein 1	4	3	4	4	3	4	0.70752	0.63978	0.94156	0.87262	0.86434	1.0021	1.13999	0.134404
gi|472585570	RHTO_07463	bud formation and morphogenesis protein	0	1	3	0	1	3	NaN	1.0255	1.3256	NaN	1.502	1.3474	0.872331	0.294093
gi|472584660	RHTO_01000	BUD22 family protein	1	1	2	1	1	2	1.2457	1.1356	0.47183	1.5891	0.7798	0.84959	1.35266	0.219377
gi|472586562	RHTO_06085	Bulb-type lectin domain containing protein	5	3	5	5	3	5	0.54557	0.57895	0.53852	0.6834	1.1344	1.4794	0.583959	0.352675
gi|472583392	RHTO_02162	bystin	4	4	6	4	4	6	1.175	1.0466	1.6726	1.3851	2.9746	1.7113	0.482578	0.129965
gi|472586268	RHTO_06855	bZIP transcription factor	4	3	2	4	3	2	0.8504	3.9869	1.0562	1.1526	0.82102	0.94149	1.31757	0.317164
gi|472582415	RHTO_03634	C2 domain protein	7	8	6	0	0	2	0.57878	0.69809	0.93564	0.71564	0.82579	0.79411	1.275	0.0731759
gi|472587081	RHTO_04759	C2 domain protein	2	1	0	2	1	0	0.64944	NaN	NaN	0.83946	0.83982	1.004	1.07921	0.100402
gi|472584443	RHTO_01252	C-22 sterol desaturase	4	6	9	4	6	9	0.69609	1.0257	1.0929	0.89614	0.95986	1.201	1.051	0.223094
gi|472583898	RHTO_01574	C2H2 finger and ankyrin domain protein	3	7	3	3	7	3	0.42752	0.95086	0.92615	0.63825	1.0367	0.8586	1.22215	0.290574
gi|472581495	RHTO_05176	C-3 sterol dehydrogenase	8	9	7	8	9	7	0.66825	0.90063	0.86726	0.82038	1.7336	0.62679	1.16107	0.525577
gi|472583032	RHTO_02642	C-4 methylsterol oxidase	1	1	1	1	1	1	0.47651	0.51849	1.0093	0.56198	1.7641	5.8667	0.441241	0.234712
gi|472580783	RHTO_05808	C6 transcription factor	11	9	13	11	9	13	0.76569	1.0457	0.95823	0.93177	0.77883	1.7767	0.829556	0.395518
gi|472580998	RHTO_05689	C6 transcription factor	3	1	0	3	1	0	0.71641	0.55963	NaN	0.88975	1.7878	1.5399	0.591195	0.0504761
gi|472584539	RHTO_00879	C6 transcription factor	0	2	2	0	2	2	NaN	0.98922	0.63205	NaN	1.121	1.3027	0.829849	0.0879812
gi|472586901	RHTO_04578	C6 transcription factor	4	9	7	4	9	7	0.30219	0.31538	0.3579	0.38674	0.7292	0.7398	1.45015	0.153788
gi|472587751	RHTO_02975	C6 transcription factor	1	2	1	1	2	1	0.6249	0.69947	0.74212	0.76106	1.1942	0.83874	1.00437	0.178362
gi|472587839	RHTO_03063	C6 transcription factor	0	1	2	0	1	2	NaN	NaN	0.528	NaN	1.155	1.2148	0.934694	0.157683
gi|472588181	RHTO_00081	C6 transcription factor	1	1	1	1	1	1	0.22565	0.15354	0.66313	0.33175	0.67316	1.2044	1.30119	0.411004
gi|472587487	RHTO_02709	C-8 sterol isomerase (erg-1)	1	2	3	1	2	3	1.163	1.0569	1.2286	1.5072	2.978	4.5319	0.27549	0.0577638
gi|472583871	RHTO_01547	Ca2+-binding actin-bundling protein	13	16	16	13	16	16	0.45299	0.49276	0.7461	0.54196	1.2875	1.262	0.798627	0.0256197
gi|472587101	RHTO_04779	Cactin	4	6	5	4	6	5	1.0562	1.3087	1.7585	1.249	4.0823	4.4175	0.183962	0.0900349
gi|472580458	RHTO_06559	Caffeine-induced death protein 2 family protein	1	1	3	1	1	2	2.0066	5.3965	2.9688	2.4518	NaN	1.6558	0.61539	0.0161953
gi|472581682	RHTO_04406	caffeoyl-CoA O-methyltransferase	1	2	1	1	2	1	0.35621	0.63798	0.88462	0.42635	0.65258	0.81009	1.3834	0.210681
gi|472586907	RHTO_04584	calcineurin temperature suppressor Cts1	1	1	1	1	1	1	0.4204	0.69415	0.67256	0.60925	0.86278	1.4385	1.08709	0.361352
gi|472586518	RHTO_06041	calcium activated cation channel	2	1	0	2	1	0	0.38916	0.92706	NaN	0.47542	NaN	0.64149	1.63377	0.105925
gi|472584152	RHTO_01405	calcium binding protein 39	1	2	1	1	2	1	0.41748	0.69491	0.57839	0.53344	0.5392	0.80618	1.55306	0.307241
gi|472588263	RHTO_00163	calcium channel subunit Cch1	0	2	0	0	2	0	NaN	0.51843	NaN	NaN	1.4604	2.4983	0.760134	0.402882
gi|472587948	RHTO_03173	calcium:hydrogen antiporter	1	0	1	1	0	1	0.34217	NaN	0.70312	0.43657	NaN	0.95178	#VALUE!	#VALUE!
gi|472587895	RHTO_03119	calcium-binding EF-hand domain-containing protein	1	0	1	1	0	1	2.1041	NaN	3.4455	2.1064	NaN	0.092915	5.8301	6.97551
gi|472584491	RHTO_01300	calcium-dependent protein serine/threonine phosphatase	2	2	2	2	2	2	0.77201	0.89052	1.0103	0.98768	0.86963	1.3706	1.30279	0.662975
gi|472587148	RHTO_04826	calcium-transporting ATPase	3	3	2	3	3	2	0.67045	0.66244	0.96326	0.90866	0.65577	NaN	1.59589	0.100364
gi|472587553	RHTO_02776	calcium-transporting ATPase	10	12	9	10	12	9	0.60686	0.66987	0.87293	0.87317	0.39771	0.54488	2.0846	0.373801
gi|472582036	RHTO_04030	calmodulin	4	6	6	4	6	6	0.11482	0.16129	0.19657	0.16515	0.91062	0.80088	1.17339	0.106401
gi|472588562	RHTO_00462	calnexin	13	13	12	13	13	12	0.29668	0.26213	0.30807	0.42895	0.31281	0.94707	2.11447	1.07067
gi|472587322	RHTO_05001	cAMP-independent regulatory protein	0	1	1	0	1	1	NaN	0.40864	1.1187	NaN	0.57379	1.0848	1.51919	0.522746
gi|472586335	RHTO_06922	cAMP-independent regulatory protein pac2	2	2	2	2	2	2	0.70964	1.2312	1.0458	0.93213	1.2416	0.86528	1.02966	0.1947
gi|472585732	RHTO_07625	cAMP-regulated phosphoprotein family protein	2	1	1	2	1	1	0.30441	0.8614	0.81595	0.40024	0.52928	0.79443	1.5771	0.315341
gi|472580413	RHTO_06589	cap binding protein	3	2	2	3	2	2	1.0309	1.1079	1.1292	1.1948	1.7192	1.0192	1.10496	0.594932
gi|472586478	RHTO_06001	CAP-Gly domain-containing protein	3	3	1	3	3	1	0.6264	0.77565	0.78103	0.89856	0.59728	0.81683	1.48281	0.232393
gi|472586459	RHTO_07046	capsular associated protein	4	3	4	4	3	4	0.68443	0.78787	1.0464	0.93716	1.5881	1.4268	0.702598	0.0737947
gi|472588189	RHTO_00089	capsular associated protein	1	0	1	1	0	1	0.61419	NaN	0.30255	0.80439	NaN	1.0295	#VALUE!	#VALUE!
gi|472586185	RHTO_06772	capsular associated protein, glycosyltransferase family 90 protein	1	3	0	1	3	0	NaN	0.63751	NaN	NaN	1.0967	1.3379	0.800773	0.0962001
gi|472586420	RHTO_07007	capsular associated protein, glycosyltransferase family 90 protein	4	3	4	0	0	1	NaN	NaN	0.71749	NaN	NaN	0.28782	2.59279	1.24678
gi|472582528	RHTO_03748	capsular related protein, Esterase, SGNH hydrolase-type domain containing	1	1	1	1	0	1	1.502	8.1191	7.2549	2.0636	0.64772	0.67296	1.40329	0.19551
gi|472586248	RHTO_06835	capsule protein, glycosyltransferase family 69 protein	3	1	3	3	1	3	0.86074	0.67744	0.57056	1.0902	1.1083	NaN	0.922084	0.0280035
gi|472581047	RHTO_05549	carbamoyl-phosphate synthase / aspartate carbamoyltransferase	52	60	67	6	7	8	0.71712	0.82072	0.86944	0.97906	1.0111	0.80495	0.999716	0.237431
gi|472587025	RHTO_04703	carbamoyl-phosphate synthase large subunit	29	34	33	27	33	32	1.8982	2.3859	2.6639	2.485	1.1126	0.96128	0.943473	0.0839194
gi|472586798	RHTO_06321	carbamoyl-phosphate synthase small subunit	10	13	12	1	2	2	2.2184	2.3606	2.9605	2.5457	0.93752	1.3206	0.929616	0.157707
gi|472584499	RHTO_01308	carbohydrate esterase family 9 protein	1	0	1	1	0	1	0.20014	NaN	0.84545	0.2845	3.0301	1.0069	0.493778	0.44092
gi|472583188	RHTO_02458	Carbohydrate-Binding Module Family 48 protein, glycogen-binding	20	26	23	20	26	23	0.36198	0.37865	0.62976	0.4826	0.92416	0.82573	1.12843	0.0717313
gi|472587301	RHTO_04980	carbonate dehydratase	8	10	8	8	10	8	0.457	0.53298	0.84824	0.55614	1.077	NaN	0.957155	0.0405167
gi|472582623	RHTO_03537	carboxy-cis,cis-muconate cyclase	4	4	3	2	2	1	1.1067	0.74393	1.5625	1.4543	1.1437	0.55267	1.27306	0.482477
gi|472582698	RHTO_03612	carboxy-cis,cis-muconate cyclase	2	0	1	2	0	1	0.65491	NaN	0.74755	0.82177	0.65394	0.5881	1.57407	0.110915
gi|472580555	RHTO_06490	carboxylesterase type B	3	4	4	3	4	4	0.44655	0.9483	3.1638	0.53571	1.7884	1.4677	0.680443	0.120839
gi|472587113	RHTO_04791	carboxymethylenebutenolidase	4	5	3	4	5	3	0.32347	0.44533	0.46053	0.43127	0.95558	1.0032	1.11846	0.169509
gi|472585091	RHTO_08010	cardiolipin synthase	3	5	3	3	5	3	1.0121	1.4435	1.5718	1.3815	1.5177	NaN	#VALUE!	#VALUE!
gi|472584101	RHTO_01354	carnitine acyl carnitine carrier, mitochondrial	2	4	6	2	4	6	0.41451	0.40169	0.54618	0.64382	1.1489	1.1215	0.814776	0.115247
gi|472583813	RHTO_01903	carnitine O-acetyltransferase	3	4	1	3	4	1	0.63236	0.43585	1.2228	0.79576	0.92543	0.70873	1.26407	0.168208
gi|472584088	RHTO_01341	carnitine O-acetyltransferase	1	1	1	1	1	1	0.67734	4.7289	2.6613	1.0104	1.0347	1.2899	0.901548	0.109388
gi|472584724	RHTO_01064	carnitine O-acetyltransferase	11	13	13	2	2	2	0.43743	0.8527	1.059	0.57398	0.55151	0.64389	1.71066	0.138537
gi|472588195	RHTO_00095	carnitine O-acetyltransferase	6	5	6	6	5	6	0.58132	0.70638	0.96865	0.71288	NaN	1.0647	1.14966	0.297586
gi|472587646	RHTO_02870	catabolite degradation protein	1	1	1	1	1	1	0.47885	0.88413	0.94163	0.66724	0.63503	0.57344	1.6593	0.119595
gi|472587771	RHTO_02995	catabolite repression protein creC	2	2	2	2	2	2	1.4953	1.2118	1.7217	1.9243	1.5117	1.4918	0.663823	0.00571386
gi|472584117	RHTO_01370	catalase A	9	15	13	9	15	13	0.049155	0.16789	0.087761	0.06954	0.70762	1.4801	1.32216	0.606159
gi|472583494	RHTO_01998	catechol 1,2-dioxygenase	0	0	1	0	0	1	NaN	NaN	0.92484	NaN	0.87258	0.96619	1.02002	0.13412
gi|472587029	RHTO_04707	catechol dioxygenase	1	1	2	1	1	2	1.0043	1.3625	1.9666	1.2295	0.72239	NaN	2.81773	2.02718
gi|472588292	RHTO_00192	cathepsin A (carboxypeptidase C)	4	6	5	4	6	5	0.57967	0.80898	0.65957	0.76498	0.963	0.90065	1.03413	0.0784166
gi|472581798	RHTO_04287	cation diffusion facilitator	3	2	1	3	2	1	0.63005	0.58882	0.47184	0.751	1.0943	0.92215	0.976362	0.0939684
gi|472584497	RHTO_01306	cation transport protein ChaC	1	1	1	1	1	1	1.3961	1.0253	1.3967	1.7793	NaN	1.4686	#VALUE!	#VALUE!
gi|472587718	RHTO_02942	Cation/H+ exchanger	1	0	0	1	0	0	NaN	NaN	NaN	NaN	0.92422	1.0009	1.0399	0.0414613
gi|472588266	RHTO_00166	cation-dependent mannose-6-phosphate receptor	1	1	2	1	1	2	0.29599	0.42881	0.4424	0.40046	0.28866	0.50102	2.57939	0.779207
gi|472586008	RHTO_07284	cation-transporting ATPase 4	3	6	6	0	1	1	NaN	0.98927	0.73467	NaN	0.67498	1.1011	1.12537	0.310912
gi|472585909	RHTO_07185	CBS and PB1 domain containing protein	8	10	11	8	10	11	0.51901	0.68497	0.94054	0.7258	0.87609	0.96075	0.799952	0.506862
gi|472587323	RHTO_05002	CCAAT-box-binding transcription factor	9	8	7	9	8	7	1.0836	1.2698	1.0401	1.4669	1.3291	1.3441	0.737503	0.0189819
gi|472584371	RHTO_01180	CCCH finger DNA binding protein	0	0	1	0	0	1	NaN	NaN	0.935	NaN	2.0793	1.3276	0.674999	0.169115
gi|472588503	RHTO_00403	CCCH finger DNA binding protein	4	6	5	4	6	5	1.3094	1.0661	2.1933	1.5661	1.3219	0.90448	0.845074	0.229446
gi|472583487	RHTO_01991	CCCH zinc finger and SMR domain containing protein	1	1	1	1	1	1	NaN	1.2945	0.53251	NaN	8.9188	4.7932	0.341692	0.317734
gi|472582361	RHTO_03851	CCCH zinc finger DNA binding protein	1	2	2	1	2	2	NaN	0.80929	1.575	NaN	0.79678	2.0041	0.927658	0.38808
gi|472586810	RHTO_06333	CCR4-NOT complex subunit CAF16	4	4	3	4	4	3	0.76664	1.312	1.4555	1.0922	1.134	1.2694	0.853836	0.057433
gi|472583770	RHTO_01860	CCR4-NOT transcription complex subunit 1	16	21	18	16	21	18	0.99811	1.4567	1.256	1.3757	0.4215	0.28407	2.31904	1.22881
gi|472585335	RHTO_07759	CCR4-NOT transcription complex subunit 2	3	5	6	3	5	6	0.76893	1.1274	1.0308	1.0237	1.2018	1.2126	0.828191	0.00371982
gi|472583136	RHTO_02406	CCR4-NOT transcription complex subunit 3	5	6	8	5	6	8	0.5339	0.81346	0.97925	0.79354	0.8171	0.76412	1.25022	0.0507195
gi|472586601	RHTO_06124	CCR4-NOT transcription complex subunit 4	4	3	5	0	1	0	NaN	1.0866	NaN	NaN	0.91178	0.80179	1.1728	0.0752402
gi|472584995	RHTO_00849	CCR4-NOT transcription complex subunit 6	5	3	3	5	3	3	0.61746	0.91244	1.5309	0.906	0.78927	0.88735	1.42016	0.392867
gi|472584321	RHTO_01130	CCR4-NOT transcription complex subunit 7/8	1	2	5	1	2	5	1.6051	1.8907	1.2786	2.4755	1.7808	2.7511	0.492294	0.111652
gi|472588504	RHTO_00404	CCR4-NOT transcriptional complex subunit CAF120	5	10	6	5	10	6	0.39358	0.74141	0.73048	0.53466	0.82883	0.61678	1.47156	0.230181
gi|472580459	RHTO_06560	CDC1p	1	1	2	1	1	2	0.37713	0.50671	0.48867	0.48093	1.0381	1.2609	0.883346	0.085574
gi|472587519	RHTO_02741	CDC-diacylglycerol-inositol-3-phosphatidyltransferase	1	0	1	1	0	1	0.51166	NaN	4.3325	0.59504	0.95167	0.59303	1.31486	0.331047
gi|472587767	RHTO_02991	CDK inhibitor PHO81	8	6	8	0	1	1	NaN	NaN	0.31006	NaN	3.3333	0.9202	0.948419	0.591518
gi|472587316	RHTO_04995	CDP-diacylglycerol-glycerol-3-phosphate 3-phosphatidyltransferase	1	1	0	0	1	0	0.82083	2.2458	NaN	1.056	0.009466	NaN	53.1888	74.179
gi|472582448	RHTO_03668	cell cycle arrest in response to pheromone-related protein	1	1	1	1	1	1	0.81287	1.2201	0.79138	1.2755	0.89258	0.75926	1.19905	0.10409
gi|472584823	RHTO_00677	cell cycle arrest protein BUB3	2	3	5	2	3	5	0.77603	1.0681	1.2989	0.95372	1.2151	1.1399	0.75728	0.163086
gi|472585969	RHTO_07245	cell cycle control protein, Cwf14	2	1	1	2	1	1	0.73336	1.1318	0.88532	1.0793	2.0868	1.7703	0.533428	0.04716
gi|472581784	RHTO_04273	cell cycle control protein, Cwf19	9	8	7	2	1	1	0.79193	0.68324	0.74697	1.1597	1.059	0.77221	1.35108	0.437542
gi|472587725	RHTO_02949	cell cycle control protein, Cwf22	1	4	5	1	4	5	0.8973	1.2658	1.4749	1.1215	1.1719	0.94859	0.968837	0.103782
gi|472583391	RHTO_02291	Cell differentiation, Rcd1-like protein	5	4	4	5	4	4	0.71732	0.91774	0.98362	1.0293	2.537	NaN	0.565951	0.24294
gi|472581978	RHTO_04221	cell division control protein	3	2	1	3	2	1	0.47494	0.70393	0.54619	0.62373	0.52357	0.61761	1.59821	0.322733
gi|472582356	RHTO_03846	cell division control protein 23	0	0	1	0	0	1	NaN	NaN	0.8843	NaN	1.0272	0.73311	1.23586	0.227214
gi|472582753	RHTO_03343	cell division control protein 24	0	4	3	0	4	3	NaN	1.3007	1.7492	NaN	0.61262	0.62204	1.52805	0.15969
gi|472587882	RHTO_03106	cell division control protein 42	4	4	5	4	4	5	0.51752	0.53002	0.70879	0.71982	NaN	0.39384	#VALUE!	#VALUE!
gi|472584334	RHTO_01143	cell division control protein 7	0	0	1	0	0	1	NaN	NaN	3.7488	NaN	2.562	NaN	#VALUE!	#VALUE!
gi|472587897	RHTO_03121	cell division control protein Cdc10	7	11	9	6	11	9	0.7531	1.0344	1.1774	0.9571	0.73816	0.70371	1.41481	0.0572281
gi|472581599	RHTO_04519	cell division control protein Cdc12	13	14	12	5	5	6	0.62386	0.76958	1.0642	0.79045	0.72879	0.92993	1.23509	0.149689
gi|472584817	RHTO_00671	cell division control protein Cdc28	6	7	4	5	6	4	0.59786	1.357	1.4095	0.8271	NaN	0.58203	#VALUE!	#VALUE!
gi|472583691	RHTO_01781	cell division control protein Cdc54	9	10	11	9	10	11	0.4612	0.6667	0.72729	0.62556	0.61725	NaN	1.35136	0.380044
gi|472584527	RHTO_00867	cell division cycle 14	1	1	1	1	1	1	4.0187	1.051	1.4668	5.1439	NaN	0.64444	1.48663	0.0920725
gi|472583142	RHTO_02412	cell division cycle protein 123	1	2	2	1	2	2	1.5718	2.4596	1.7627	1.8968	0.38981	0.54415	1.92928	0.5956
gi|472582911	RHTO_02521	cell polarity protein	5	10	8	5	10	8	0.45018	0.71048	0.97116	0.59788	1.0768	1.0163	0.9952	0.0727955
gi|472584628	RHTO_00968	cell polarity protein, Tea1	7	6	6	7	6	6	0.59249	0.74331	0.85345	0.73814	0.61629	0.67932	1.53899	0.0766513
gi|472585431	RHTO_07856	cell wall biogenesis protein phosphatase, Ssd1	7	9	13	0	0	1	0.77959	0.80976	1.0701	0.95159	1.3144	0.55031	1.22587	0.539368
gi|472588406	RHTO_00306	cell wall integrity signaling protein	1	4	3	1	4	3	0.58676	0.8463	1.2528	0.78214	2.1244	1.3414	0.621111	0.139219
gi|472583406	RHTO_02241	cellular morphogenesis-related protein	7	6	7	2	1	1	0.54218	1.0897	0.87482	0.65055	1.2837	0.97223	0.868485	0.138953
gi|472587362	RHTO_05041	cellular morphogenesis-related protein	4	5	2	4	5	2	0.55794	1.5366	0.63448	0.76281	0.99042	1.0735	0.969316	0.0391336
gi|472588585	RHTO_00485	centrin 3	1	3	3	1	3	3	1.1905	0.68863	2.0337	1.558	1.5679	1.3038	0.747365	0.101195
gi|472587937	RHTO_03162	centromere microtubule binding protein cbf5	8	11	16	8	11	16	1.3356	1.4485	1.7304	1.7704	0.38159	0.4228	2.59908	0.223904
gi|472584827	RHTO_00681	centromere/kinetochore protein ZW10	0	2	2	0	2	2	NaN	1.0054	1.3373	NaN	0.90287	1.1176	1.21337	0.382624
gi|472582913	RHTO_02523	chalcone-flavanone isomerase	1	2	5	1	2	5	0.47558	0.63823	0.80454	0.61449	1.0958	1.1827	0.751566	0.223339
gi|472581605	RHTO_04525	chaperone regulator	4	4	4	4	4	4	0.86485	0.98361	0.93127	1.0168	1.2421	1.4168	0.755452	0.0701961
gi|472582334	RHTO_03824	chaperone regulator	4	4	3	4	4	3	0.72678	1.1227	1.327	0.89678	0.58852	NaN	1.4076	0.412354
gi|472587744	RHTO_02968	chaperone regulator	2	3	2	2	3	2	0.4872	0.63543	1.3329	0.62982	NaN	0.93369	1.11904	0.0679149
gi|472586385	RHTO_06972	chaperonin GroES	6	8	7	6	8	7	2.7546	2.8791	5.3683	3.7035	0.35951	0.46314	2.73684	0.556657
gi|472585479	RHTO_07904	chaperonin-containing t-complex zeta subunit, Cct6	14	13	15	14	13	15	0.87357	1.0798	1.3639	1.2095	NaN	NaN	#VALUE!	#VALUE!
gi|472584931	RHTO_00785	CHCH domain protein	2	2	1	2	2	1	9.4432	3.4282	4.3778	12.414	0.36503	0.25799	3.26183	0.573862
gi|472582480	RHTO_03700	chitin deacetylase	1	2	1	1	2	1	NaN	0.53395	0.76087	NaN	1.2612	0.38658	1.39577	1.03148
gi|472585144	RHTO_08063	chitin deacetylase, carbohydrate esterase family 4 protein	2	2	4	2	2	4	0.57405	0.75964	1.4949	0.71071	1.4257	NaN	1.01553	0.44423
gi|472585986	RHTO_07262	chitin deacetylase, carbohydrate esterase family 4 protein	1	0	1	1	0	1	0.41159	NaN	0.58547	0.58525	0.073396	0.058327	14.6367	2.18547
gi|472586517	RHTO_06040	chitin deacetylase, carbohydrate esterase family 4 protein	1	2	3	1	2	3	0.4485	0.44945	0.73905	0.63932	0.47715	0.86896	1.62329	0.668199
gi|472584339	RHTO_01148	chitin synthase	5	2	3	5	2	3	0.54822	1.1081	2.4271	0.83655	1.8586	0.7593	0.677045	0.583018
gi|472580781	RHTO_05806	chitin synthase activator	0	0	3	0	0	3	NaN	NaN	0.87043	NaN	0.80919	0.44704	1.97079	0.644531
gi|472584151	RHTO_01404	chitin synthase activator	1	0	1	1	0	1	0.85831	NaN	0.092577	1.114	NaN	NaN	#VALUE!	#VALUE!
gi|472585900	RHTO_07176	chitin synthase export chaperone	1	2	2	1	2	2	0.36965	0.81884	1.5039	0.49289	1.8208	1.3175	0.654439	0.104904
gi|472582202	RHTO_03942	chitin synthase, glycosyltransferase family 2 protein	2	2	0	2	2	0	0.40463	0.51611	NaN	0.59993	0.70305	0.8554	1.47803	0.340246
gi|472583189	RHTO_02459	chitin synthase, glycosyltransferase family 2 protein	4	5	6	4	5	6	0.43383	0.32777	0.59349	0.52517	1.0914	1.0188	1.00985	0.110506
gi|472585061	RHTO_07980	chitin synthase, glycosyltransferase family 2 protein	0	2	1	0	2	1	NaN	0.82421	0.93809	NaN	0.16272	0.22611	5.29718	0.861749
gi|472586040	RHTO_07316	chitin synthase, glycosyltransferase family 2 protein	5	2	3	5	2	3	0.39277	0.28494	0.96383	0.47831	0.87699	0.98767	1.00045	0.1462
gi|472588233	RHTO_00133	chitin synthase, glycosyltransferase family 2 protein	2	2	2	2	2	2	0.43671	0.50062	1.1354	0.52828	1.5877	1.1622	0.748351	0.115432
gi|472588556	RHTO_00456	chitin synthase, glycosyltransferase family 2 protein	8	10	10	8	10	10	0.75463	1.2427	0.87766	0.88663	0.49183	0.53982	1.92761	0.0941509
gi|472588622	RHTO_00522	choline dehydrogenase	3	5	4	3	5	4	0.47703	0.43855	0.81917	0.63164	NaN	1.129	1.17417	0.407908
gi|472582770	RHTO_03360	choline-phosphate cytidylyltransferase	5	6	4	5	6	4	0.45949	0.51407	0.85749	0.64519	NaN	1.2158	0.78061	0.0592468
gi|472582156	RHTO_03895	chorismate mutase	5	7	5	5	7	5	0.9316	1.335	1.4861	1.2866	NaN	NaN	#VALUE!	#VALUE!
gi|472582560	RHTO_03474	chorismate mutase / prephenate dehydratase	0	1	1	0	1	1	NaN	NaN	1.0737	NaN	0.84021	0.36528	1.77908	0.837331
gi|472580914	RHTO_05784	chorismate synthase	13	16	15	13	16	15	0.96379	1.0003	1.3405	1.3458	0.72993	0.70396	1.2654	0.226347
gi|472582868	RHTO_03458	chromate transmembrane transporter	2	1	4	1	0	2	0.43295	NaN	0.29037	0.58439	1.6367	0.87802	0.926568	0.278697
gi|472585496	RHTO_07921	chromatin assembly factor 1 subunit B	3	2	2	3	2	2	0.62756	0.57158	0.66227	0.84744	0.96803	0.93139	1.07176	0.0378221
gi|472581081	RHTO_05583	chromatin modification-related protein	5	2	1	5	2	1	0.77693	0.94348	NaN	1.0617	1.1634	0.90252	1.13532	0.290387
gi|472581396	RHTO_05298	chromatin remodeling complex subunit, Chd3	2	2	1	2	2	1	1.0689	0.88859	0.90345	1.3024	0.56061	0.80278	1.5466	0.274657
gi|472584647	RHTO_00987	chromatin remodelling complex ATPase chain ISW1	28	27	29	28	27	29	0.81724	0.90594	1.0246	1.1219	1.9576	1.545	0.505535	0.144435
gi|472580433	RHTO_06534	chromatin structure-remodeling complex protein Rsc1	1	1	2	1	1	2	0.76613	0.94604	1.3563	1.0363	NaN	1.0714	0.977394	0.0622759
gi|472584142	RHTO_01395	chromatin structure-remodeling complex protein RSC7	1	2	2	1	2	2	4.6553	2.7521	1.0744	6.3225	1.2738	1.2802	0.707153	0.131542
gi|472585200	RHTO_08119	chromatin structure-remodeling complex subunit RSC8	8	9	9	0	2	1	0.67226	0.79007	0.85498	0.91561	0.19526	0.30891	3.5539	1.43556
gi|472582566	RHTO_03480	chromatin structure-remodeling complex subunit RSC9	2	7	0	2	7	0	0.86104	0.95192	NaN	1.0144	1.8361	1.5908	0.662947	0.138705
gi|472586296	RHTO_06883	chromatin structure-remodeling complex subunit SFH1	2	4	4	2	4	4	0.75438	1.0244	0.53081	0.88073	0.75742	0.74965	1.37525	0.0836526
gi|472580654	RHTO_05969	Chromo domain containing protein	5	4	5	5	4	5	0.47917	0.65964	0.69592	0.66996	2.3746	NaN	0.4099	0.0158725
gi|472586336	RHTO_06923	Chromo domain containing protein	3	2	1	3	2	1	1.0438	1.5276	1.5241	1.2487	0.15756	0.16648	8.33149	3.73597
gi|472586795	RHTO_06318	Chromo domain-like containing protein	5	6	4	2	3	2	0.60037	0.82486	1.1109	0.76215	0.5228	NaN	#VALUE!	#VALUE!
gi|472585855	RHTO_07131	chromosome segregation protein	0	1	0	0	1	0	NaN	1.1948	NaN	NaN	NaN	0.94104	#VALUE!	#VALUE!
gi|472588155	RHTO_00055	chromosome segregation protein, Pcs1	1	1	2	1	1	2	1.1283	0.90404	1.2472	1.4657	0.89354	0.73383	1.39476	0.292954
gi|472582573	RHTO_03487	chromosome segregation protein, SudA	9	9	9	9	9	9	0.6189	0.81922	0.73791	0.76885	0.31162	0.26399	3.37343	0.361597
gi|472585948	RHTO_07224	chromosome structural maintenance protein smc5	3	1	2	3	1	2	0.83138	0.95382	1.2468	1.0385	NaN	1.4455	0.940424	0.351605
gi|472585195	RHTO_08114	chromosome transmission fidelity factor	1	3	2	1	3	2	0.39342	0.38314	0.5857	0.56634	1.1974	0.62777	1.13632	0.402103
gi|472584323	RHTO_01132	chromosome transmission fidelity protein	1	0	1	1	0	1	0.50531	NaN	0.92645	0.73525	1.1115	1.2967	0.835437	0.0908609
gi|472585265	RHTO_07689	citrate lyase subunit beta-like protein	0	2	2	0	2	2	NaN	0.54752	0.57547	NaN	1.2824	0.86137	1.12233	0.324956
gi|472580574	RHTO_06406	citrate synthase	27	27	26	27	27	26	1.1236	1.284	1.6862	1.516	0.9242	1.6723	1.13009	0.557706
gi|472586069	RHTO_07345	citrate synthase	5	6	4	5	6	4	0.36554	0.57217	1.3733	0.53258	NaN	0.64053	#VALUE!	#VALUE!
gi|472581980	RHTO_04223	Class E vacuolar protein-sorting machinery protein hse1	4	3	2	4	3	2	0.75128	0.61705	1.0185	1.1376	3.8489	2.1428	0.606089	0.433146
gi|472584798	RHTO_00652	class II aldolase/adducin domain containing protein	1	1	0	1	1	0	0.15646	0.66838	NaN	0.23523	NaN	0.3859	#VALUE!	#VALUE!
gi|472584207	RHTO_01460	clathrin assembly protein ap47	5	4	3	5	4	3	1.0828	0.99454	0.99119	1.2711	1.149	1.105	0.884498	0.0181673
gi|472582715	RHTO_03305	clathrin binding protein	9	10	7	9	10	7	0.80886	0.97117	0.92086	1.0743	1.2793	1.0739	0.846141	0.0768495
gi|472583854	RHTO_01530	clathrin coat assembly protein ap19	0	0	1	0	0	1	NaN	NaN	1.4266	NaN	0.8719	1.2538	1.05865	0.230019
gi|472580384	RHTO_06614	clathrin heavy chain	40	50	43	40	50	43	0.74911	0.79478	1.0346	0.96282	1.8068	1.7596	0.548637	0.0224794
gi|472585993	RHTO_07269	clathrin light chain	3	3	4	3	3	4	0.37116	0.26032	0.55926	0.43899	NaN	0.76281	1.09674	0.30293
gi|472580326	RHTO_06630	clathrin-coated vesicle protein (partial sequence c terminus)	9	6	10	9	6	10	0.81302	0.62061	1.0968	1.0138	0.92392	NaN	#VALUE!	#VALUE!
gi|472583031	RHTO_02641	cleavage and polyadenylation specific factor 5	1	1	1	1	1	1	3.1787	0.72305	0.99206	4.5963	NaN	0.3203	1.89555	1.73456
gi|472583284	RHTO_02148	cleavage and polyadenylation specificity factor	3	8	7	3	8	7	0.89961	1.2239	1.301	1.3964	NaN	2.5681	#VALUE!	#VALUE!
gi|472580307	RHTO_06665	cleavage and polyadenylation specificity factor subunit 1	5	4	4	5	4	4	1.0644	1.7745	1.4124	1.2645	0.53019	0.35291	2.05136	0.714083
gi|472585354	RHTO_07778	cleavage and polyadenylation specificity factor subunit 2	2	2	3	0	1	1	1.1904	1.1751	1.0285	1.4856	0.82788	NaN	#VALUE!	#VALUE!
gi|472583149	RHTO_02419	cleavage and polyadenylation specificity factor subunit 3	2	1	1	2	1	1	1.1504	7.7089	5.0892	1.4198	0.91192	0.93013	1.07513	0.0214566
gi|472580421	RHTO_06597	cleavage and polyadenylation specificity factor subunit 4	2	1	1	2	1	1	0.7398	0.74119	2.1888	0.97187	1.3617	0.99608	0.851346	0.138265
gi|472588227	RHTO_00127	cleavage stimulation factor subunit 2	2	3	4	2	3	4	1.0016	1.0278	1.4397	1.1212	NaN	NaN	#VALUE!	#VALUE!
gi|472586374	RHTO_06961	Cleft lip and palate associated transmembrane protein	2	2	2	2	2	2	0.71548	0.38251	0.33261	0.93952	1.5219	1.1148	0.537201	0.432404
gi|472584813	RHTO_00667	coatomer protein complex, subunit alpha	33	36	32	4	3	4	0.96104	1.1305	1.3436	1.208	0.63677	0.74228	1.43833	0.117118
gi|472588712	RHTO_00612	coatomer protein complex, subunit beta	22	20	18	22	20	18	0.63273	0.73685	0.83591	0.82093	1.429	0.5107	1.73341	0.941596
gi|472584569	RHTO_00909	coatomer protein complex, subunit epsilon	6	9	10	2	3	3	0.67066	0.79384	0.88303	0.85147	NaN	NaN	#VALUE!	#VALUE!
gi|472582634	RHTO_03548	coatomer protein complex, subunit gamma	12	17	15	0	1	2	0.44956	0.67817	0.9751	0.53575	0.90741	1.2078	0.955119	0.138106
gi|472583209	RHTO_02479	coatomer protein complex, subunit zeta	2	1	1	2	1	1	1.4942	1.6186	2.9964	1.8121	0.43299	6.2166	1.23519	1.51933
gi|472581425	RHTO_05327	COBW domain containing protein 2	2	1	3	2	1	3	0.47188	0.65757	0.68716	0.63018	1.2806	1.3095	0.771373	0.00875479
gi|472585703	RHTO_07596	cofilin	7	8	8	7	8	8	0.8828	0.99438	1.298	1.119	NaN	0.67222	#VALUE!	#VALUE!
gi|472587509	RHTO_02731	cohesin complex subunit SA-1/2	4	9	6	4	9	6	0.66116	0.80486	0.51895	0.82812	1.2267	2.2459	0.696157	0.217381
gi|472581610	RHTO_04530	cohesin complex subunit SCC1	2	1	1	2	1	1	0.52972	2.5058	0.88483	0.68562	1.2127	1.1732	0.838488	0.0196316
gi|472585777	RHTO_07670	cohesin loading factor subunit SCC2	2	1	1	2	1	1	1.032	0.0068296	NaN	1.3581	0.89043	NaN	1.14686	0.033672
gi|472584189	RHTO_01442	cohesin-associated protein Pds5	5	5	6	5	5	6	0.70937	0.75637	0.72756	0.86227	NaN	NaN	#VALUE!	#VALUE!
gi|472587702	RHTO_02926	coiled-coil domain containing	2	1	1	2	1	1	1.256	0.93569	1.1278	1.7495	0.87547	NaN	1.28125	0.196582
gi|472587686	RHTO_02910	Coiled-coil domain-containing protein 56	4	5	5	1	2	2	1.4272	1.8557	1.8732	1.7979	2.115	1.9714	0.48765	0.0177083
gi|472587295	RHTO_04974	cold-shock DNA-binding domain containing protein	3	1	1	3	1	1	0.44612	0.89428	0.76801	0.55128	1.2434	1.1407	0.849026	0.0391323
gi|472583874	RHTO_01550	complex I intermediate-associated protein CIA30	2	6	5	2	6	5	0.77086	0.88399	0.99425	1.001	0.60071	0.81034	1.39789	0.233059
gi|472585491	RHTO_07916	component of oligomeric golgi complex 5	2	2	0	2	2	0	1.1737	2.2195	NaN	1.3555	1.6034	NaN	0.795209	0.242587
gi|472585591	RHTO_07484	component of oligomeric golgi complex 6	3	2	2	3	2	2	0.60371	0.47216	0.65571	0.79019	0.91431	1.1645	0.904035	0.171581
gi|472582772	RHTO_03362	component of oligomeric golgi complex 7	2	2	3	2	2	3	0.64254	0.88932	0.79185	0.72992	NaN	0.71709	1.90043	0.715457
gi|472584784	RHTO_00638	condensin complex subunit 1	4	3	3	4	3	3	0.68119	0.56744	0.61999	0.74393	0.74437	0.57492	1.38629	0.333719
gi|472580605	RHTO_06437	condensin complex subunit 2	0	0	3	0	0	3	NaN	NaN	0.45585	NaN	0.26761	0.3214	6.0072	4.485
gi|472581377	RHTO_05279	condensin complex subunit 3	1	1	0	1	1	0	NaN	1.7088	NaN	NaN	0.6015	NaN	1.45017	0.300299
gi|472584873	RHTO_00727	condensin complex subunit SMC1	16	11	8	6	4	3	0.51451	0.67205	0.72412	0.68089	0.46323	0.37859	2.51359	0.311275
gi|472586661	RHTO_06184	conjugated polyketone reductase C1	9	10	11	1	2	3	0.68385	0.66105	0.97706	0.79505	1.3365	1.2435	0.866253	0.158462
gi|472587865	RHTO_03089	conserve hypothetical protein	0	0	2	0	0	1	NaN	NaN	0.71301	NaN	0.1461	0.69926	4.13736	3.82866
gi|472584351	RHTO_01160	conserved domain protein	3	2	0	2	1	0	0.70173	0.54408	NaN	0.92368	1.8511	1.0881	0.710598	0.192253
gi|472583008	RHTO_02618	conserved fungal protein	4	0	1	4	0	1	0.50804	NaN	0.6259	0.70347	0.4587	NaN	2.0487	0.185792
gi|472580317	RHTO_06675	conserved hypothetical protein	1	1	1	1	1	1	0.61177	0.36886	0.59603	0.72215	0.36722	0.29926	2.74529	0.585537
gi|472580377	RHTO_06619	conserved hypothetical protein	4	10	6	4	10	6	0.60731	0.8701	1.0442	0.932	0.94148	NaN	0.970794	0.129208
gi|472580483	RHTO_06504	conserved hypothetical protein	3	8	3	3	8	3	0.55205	0.60052	0.75729	0.6569	0.7042	0.72719	1.31651	0.142242
gi|472580543	RHTO_06478	conserved hypothetical protein	1	1	1	1	1	1	0.79797	1.1086	0.50459	0.90937	1.0745	1.3875	0.713135	0.221421
gi|472580571	RHTO_06403	conserved hypothetical protein	1	2	1	1	2	1	1.2352	1.8676	1.4288	1.5453	0.79149	0.66845	1.48162	0.211363
gi|472580592	RHTO_06424	conserved hypothetical protein	2	3	2	2	1	1	0.98	1.2623	1.0245	1.2533	NaN	1.9033	0.690967	0.234143
gi|472580612	RHTO_06444	conserved hypothetical protein	1	4	2	1	2	1	0.82041	0.79859	1.0109	1.0344	2.5285	4.0925	1.14922	1.43837
gi|472580614	RHTO_06446	conserved hypothetical protein	1	3	4	1	3	4	0.63137	0.93773	0.54091	0.74477	1.078	0.84415	1.07086	0.130996
gi|472580640	RHTO_05955	conserved hypothetical protein	4	5	6	4	5	6	0.97078	1.3829	1.3734	1.1943	NaN	0.34747	2.70566	0.243647
gi|472580645	RHTO_05960	conserved hypothetical protein	8	5	5	8	5	5	0.27512	0.35089	0.44094	0.35569	NaN	NaN	#VALUE!	#VALUE!
gi|472580651	RHTO_05966	conserved hypothetical protein	8	7	7	8	7	7	0.49054	0.83364	1.2	0.61059	0.74921	0.93409	1.30113	0.215744
gi|472580692	RHTO_05867	conserved hypothetical protein	3	4	3	1	1	1	1.3507	0.80483	1.1139	2.0137	1.9807	1.6659	0.53475	0.0568207
gi|472580756	RHTO_05931	conserved hypothetical protein	1	2	1	1	1	1	NaN	0.94688	1.3009	NaN	0.74409	0.71534	1.48161	0.193595
gi|472580761	RHTO_05936	conserved hypothetical protein	1	1	0	1	1	0	0.80774	0.57338	NaN	0.89604	1.6235	1.4229	0.659372	0.061403
gi|472580770	RHTO_05795	conserved hypothetical protein	1	0	1	1	0	1	0.65728	NaN	1.0425	0.85685	0.78476	0.75905	1.37028	0.130703
gi|472580779	RHTO_05804	conserved hypothetical protein	1	2	2	1	2	2	0.25559	0.33574	0.42279	0.30583	NaN	NaN	#VALUE!	#VALUE!
gi|472580839	RHTO_05864	conserved hypothetical protein	1	0	0	1	0	0	0.94323	NaN	NaN	1.259	1.2863	1.2798	0.779398	0.00279199
gi|472580889	RHTO_05759	conserved hypothetical protein	3	6	5	3	6	5	0.22699	0.37024	0.2974	0.31547	0.89717	0.7278	1.17228	0.179958
gi|472580891	RHTO_05761	conserved hypothetical protein	1	1	2	1	1	2	0.91639	0.89974	0.51686	1.2382	NaN	2.0936	#VALUE!	#VALUE!
gi|472580916	RHTO_05786	conserved hypothetical protein	2	2	0	0	1	0	0.65599	1.3066	NaN	0.75208	0.35795	0.25355	3.36884	0.813391
gi|472580936	RHTO_05627	conserved hypothetical protein	12	14	12	7	8	8	0.054507	0.06233	0.06597	0.0761	0.9593	1.5511	0.956896	0.279424
gi|472580943	RHTO_05634	conserved hypothetical protein	0	1	2	0	1	2	NaN	0.39119	0.93781	NaN	NaN	0.55028	1.27079	0.772821
gi|472580952	RHTO_05643	conserved hypothetical protein	2	1	3	2	1	3	4.5363	1.648	0.85926	5.6788	0.37238	NaN	1.82261	1.22021
gi|472581065	RHTO_05567	conserved hypothetical protein	7	8	7	7	8	7	0.33153	0.73725	0.45843	0.4099	0.28924	0.66684	2.40183	0.987823
gi|472581078	RHTO_05580	conserved hypothetical protein	1	0	0	1	0	0	0.68413	NaN	NaN	0.8481	0.55982	0.42666	1.8536	0.460231
gi|472581214	RHTO_05531	conserved hypothetical protein	1	3	1	1	3	1	1.1363	1.47	1.3053	1.5265	0.86542	1.0745	1.4485	0.711138
gi|472581350	RHTO_05252	conserved hypothetical protein	5	5	3	5	5	3	0.38309	0.59907	0.88136	0.54269	1.1869	1.2937	0.807754	0.0491823
gi|472581351	RHTO_05253	conserved hypothetical protein	5	6	6	5	6	6	0.69325	0.93696	1.0705	0.88358	2.9386	NaN	0.477595	0.194168
gi|472581366	RHTO_05268	conserved hypothetical protein	10	11	10	10	11	10	0.15525	0.16312	0.23296	0.18785	NaN	0.88466	0.730982	0.56483
gi|472581427	RHTO_05329	conserved hypothetical protein	1	2	1	1	2	1	0.88282	0.70408	0.97196	1.1784	NaN	NaN	#VALUE!	#VALUE!
gi|472581514	RHTO_05195	conserved hypothetical protein	4	4	5	4	4	5	1.0002	1.4871	1.2283	1.3249	0.67049	0.28935	2.65639	1.03198
gi|472581628	RHTO_04548	conserved hypothetical protein	3	4	3	3	4	3	0.36771	0.40239	0.61205	0.52711	0.92936	0.84429	1.20236	0.136203
gi|472581632	RHTO_04552	conserved hypothetical protein	1	0	1	1	0	1	0.56892	NaN	1.1285	0.68371	1.7821	1.3129	0.661404	0.141801
gi|472581742	RHTO_04466	conserved hypothetical protein	1	1	3	0	0	2	1.056	NaN	1.1444	1.3537	0.67642	0.78792	1.3922	0.109366
gi|472581780	RHTO_04269	conserved hypothetical protein	1	0	0	1	0	0	0.86008	NaN	NaN	1.0881	0.53705	0.60104	1.82126	0.141572
gi|472581799	RHTO_04288	conserved hypothetical protein	1	2	1	1	2	1	0.60711	0.73067	0.41515	0.7095	NaN	1.0591	1.11145	0.236534
gi|472581812	RHTO_04301	conserved hypothetical protein	3	4	1	3	4	1	0.769	0.62336	0.73546	0.99436	0.57039	1.0515	1.11294	0.576604
gi|472581827	RHTO_04316	conserved hypothetical protein	1	1	1	1	1	1	0.67299	1.3006	0.94076	0.97107	0.83062	0.97097	1.31483	0.353672
gi|472581829	RHTO_04318	conserved hypothetical protein	1	1	2	0	0	1	0.74349	0.9023	1.0831	0.90204	NaN	0.88832	#VALUE!	#VALUE!
gi|472581907	RHTO_04150	conserved hypothetical protein	1	1	1	1	1	1	0.53337	1.069	1.0186	0.69522	NaN	NaN	#VALUE!	#VALUE!
gi|472582067	RHTO_04061	conserved hypothetical protein	1	3	1	1	3	1	0.43635	0.57224	0.89147	0.62098	1.8097	NaN	0.838074	0.403753
gi|472582106	RHTO_04100	conserved hypothetical protein	1	4	3	1	4	3	2.234	1.7666	1.6798	2.7892	2.0785	2.2551	0.403157	0.104118
gi|472582168	RHTO_03907	conserved hypothetical protein	1	0	1	1	0	1	0.63861	NaN	1.0432	0.97902	1.5191	1.2469	0.649344	0.157307
gi|472582234	RHTO_03974	conserved hypothetical protein	1	2	2	1	2	2	1.4394	1.1914	1.3691	1.8009	0.80842	0.55213	1.52407	0.406011
gi|472582242	RHTO_03982	conserved hypothetical protein	6	9	8	6	9	8	0.33093	0.16126	0.32694	0.43419	0.86168	0.71128	1.26115	0.128512
gi|472582295	RHTO_03785	conserved hypothetical protein	3	4	3	3	4	3	0.95948	1.4806	1.8045	1.2261	1.077	0.8184	1.26496	0.359932
gi|472582393	RHTO_03883	conserved hypothetical protein	1	2	1	1	2	1	0.52459	0.64786	0.85956	0.67957	0.9675	1.0239	1.04339	0.0721325
gi|472582613	RHTO_03527	conserved hypothetical protein	1	1	0	1	1	0	1.9697	1.7843	NaN	2.5083	1.5354	0.89291	0.839445	0.247589
gi|472582644	RHTO_03558	conserved hypothetical protein	7	8	9	3	3	4	0.057954	0.1334	0.1747	0.079108	NaN	0.71058	1.36463	0.0603421
gi|472582662	RHTO_03576	conserved hypothetical protein	0	2	0	0	2	0	NaN	0.43162	NaN	NaN	NaN	2.6585	0.462967	0.122776
gi|472582673	RHTO_03587	conserved hypothetical protein	0	0	1	0	0	1	NaN	NaN	0.74339	NaN	0.79863	0.80365	1.40509	0.271712
gi|472582727	RHTO_03317	conserved hypothetical protein	4	8	4	4	8	4	0.4654	0.84756	0.76408	0.5874	1.5822	NaN	#VALUE!	#VALUE!
gi|472582807	RHTO_03397	conserved hypothetical protein	9	7	5	9	7	5	0.24858	0.31938	0.26317	0.32018	0.63805	0.91966	1.07216	0.502879
gi|472582862	RHTO_03452	conserved hypothetical protein	2	0	2	2	0	2	0.65801	NaN	1.3513	0.84101	0.94845	1.4143	1.26644	0.690305
gi|472582916	RHTO_02526	conserved hypothetical protein	2	2	2	2	2	2	0.79381	1.0471	0.58819	1.0195	0.77935	0.92765	1.15055	0.114978
gi|472582947	RHTO_02557	conserved hypothetical protein	0	3	1	0	3	1	NaN	1.0113	1.2512	NaN	0.47167	2.2381	1.28347	1.18322
gi|472582960	RHTO_02570	conserved hypothetical protein	3	2	2	3	2	2	0.55782	1.1506	0.96735	0.70114	NaN	0.86711	1.03208	0.171363
gi|472582969	RHTO_02579	conserved hypothetical protein	2	2	2	2	2	2	0.46662	0.83716	1.8952	0.5847	NaN	NaN	#VALUE!	#VALUE!
gi|472583039	RHTO_02649	conserved hypothetical protein	0	0	1	0	0	1	NaN	NaN	0.55114	NaN	NaN	NaN	#VALUE!	#VALUE!
gi|472583052	RHTO_02662	conserved hypothetical protein	3	2	4	3	2	4	0.73905	3.3112	2.3525	0.91594	1.5585	2.1362	0.633467	0.161414
gi|472583140	RHTO_02410	conserved hypothetical protein	0	0	1	0	0	1	NaN	NaN	0.37514	NaN	0.15876	0.32038	5.33591	1.92334
gi|472583198	RHTO_02468	conserved hypothetical protein	7	8	7	7	8	7	0.77785	0.98997	1.0816	1.1387	0.64249	0.69917	1.49336	0.0892207
gi|472583265	RHTO_02311	conserved hypothetical protein	7	5	7	2	1	3	0.90418	1.1611	0.95122	1.2113	0.75808	0.42617	1.84437	0.514071
gi|472583267	RHTO_02322	conserved hypothetical protein	1	4	6	1	4	6	0.58569	0.69725	1.2738	0.81204	NaN	1.0654	#VALUE!	#VALUE!
gi|472583274	RHTO_02221	conserved hypothetical protein	6	9	8	1	3	3	1.3535	1.4418	1.676	1.9079	NaN	1.2428	0.897416	0.131212
gi|472583414	RHTO_02315	conserved hypothetical protein	2	0	1	2	0	1	0.96699	NaN	0.70638	1.1331	0.30126	0.27712	3.48352	0.148489
gi|472583417	RHTO_02202	conserved hypothetical protein	1	2	0	1	2	0	NaN	0.82505	NaN	NaN	0.42368	0.73001	1.91613	0.503054
gi|472583471	RHTO_01975	conserved hypothetical protein	1	0	2	1	0	2	1.1106	NaN	0.32161	1.4947	0.37952	0.61122	2.19123	0.508664
gi|472583491	RHTO_01995	conserved hypothetical protein	0	0	1	0	0	1	NaN	NaN	2.7038	NaN	1.4826	NaN	#VALUE!	#VALUE!
gi|472583531	RHTO_02035	conserved hypothetical protein	2	2	2	2	2	2	0.60535	0.46109	0.51	0.69716	1.9631	1.2134	0.726398	0.188236
gi|472583577	RHTO_02081	conserved hypothetical protein	0	1	0	0	1	0	NaN	0.73058	NaN	NaN	NaN	NaN	#VALUE!	#VALUE!
gi|472583775	RHTO_01865	conserved hypothetical protein	4	5	6	3	3	3	0.77081	0.7105	0.86418	0.94906	1.4801	1.6774	0.636923	0.0397745
gi|472583973	RHTO_01649	conserved hypothetical protein	1	2	1	1	2	1	0.95028	1.2368	0.98392	1.2259	1.3771	1.5883	0.862437	0.32328
gi|472583975	RHTO_01651	conserved hypothetical protein	1	0	0	1	0	0	0.45864	NaN	NaN	0.59784	3.7087	0.99123	0.807301	0.470468
gi|472584181	RHTO_01434	conserved hypothetical protein	4	4	5	1	1	1	15.154	1.4133	1.256	17.389	1.0191	0.86642	1.09254	0.0965603
gi|472584208	RHTO_01461	conserved hypothetical protein	2	3	2	2	3	2	0.55771	0.58227	0.80303	0.71564	0.71908	0.98983	1.2274	0.19583
gi|472584352	RHTO_01161	conserved hypothetical protein	1	1	1	1	1	1	0.32259	1.3432	0.48972	0.39334	1.1127	1.3368	0.823385	0.106533
gi|472584410	RHTO_01219	conserved hypothetical protein	2	0	0	2	0	0	0.61923	NaN	NaN	0.79329	0.57656	NaN	1.42165	0.442335
gi|472584416	RHTO_01225	conserved hypothetical protein	4	9	6	4	9	6	0.85074	0.8281	1.3805	1.0691	1.3502	1.4034	0.75646	0.0536015
gi|472584446	RHTO_01255	conserved hypothetical protein	3	5	6	0	1	1	NaN	0.32418	6.6711	NaN	0.8378	0.94933	1.27023	0.263662
gi|472584492	RHTO_01301	conserved hypothetical protein	3	5	5	3	5	5	1.0057	0.93827	1.348	1.2994	1.3365	0.95257	0.973824	0.198818
gi|472584535	RHTO_00875	conserved hypothetical protein	0	0	2	0	0	2	NaN	NaN	0.70476	NaN	0.50256	0.44875	2.00804	0.211844
gi|472584568	RHTO_00908	conserved hypothetical protein	7	6	3	7	6	3	0.86955	1.0694	2.1617	1.2077	1.9552	0.88792	1.02001	0.464645
gi|472584575	RHTO_00915	conserved hypothetical protein	0	1	1	0	1	1	NaN	1.0176	1.2958	NaN	1.0551	1.0643	0.869032	0.12936
gi|472584829	RHTO_00683	conserved hypothetical protein	1	2	0	1	2	0	0.60745	0.69924	NaN	0.85421	1.3975	0.75272	0.930302	0.345217
gi|472584893	RHTO_00747	conserved hypothetical protein	0	2	0	0	1	0	NaN	NaN	NaN	NaN	1.1544	1.1164	0.868125	0.026723
gi|472584907	RHTO_00761	conserved hypothetical protein	4	1	0	4	1	0	0.52302	0.73737	NaN	0.7041	0.65299	0.73016	1.37275	0.157097
gi|472585051	RHTO_07970	conserved hypothetical protein	8	8	6	3	3	3	1.6784	2.2187	2.4294	2.0709	NaN	0.58413	#VALUE!	#VALUE!
gi|472585170	RHTO_08089	conserved hypothetical protein	1	1	1	1	1	1	0.96338	1.1	1.1673	1.1545	0.98113	NaN	1.12462	0.149033
gi|472585229	RHTO_08148	conserved hypothetical protein	1	1	1	1	1	1	0.58334	0.61228	0.90941	0.77225	0.32992	0.41501	2.91927	0.464013
gi|472585247	RHTO_08166	conserved hypothetical protein	2	1	1	2	1	1	0.82759	1.4909	NaN	1.0344	0.76523	0.94146	1.34938	0.310695
gi|472585387	RHTO_07811	conserved hypothetical protein	2	1	1	2	1	1	0.95327	0.70063	1.0657	1.3164	1.2408	1.2696	0.767182	0.052092
gi|472585485	RHTO_07910	conserved hypothetical protein	3	0	1	3	0	1	0.31196	NaN	0.73121	0.41557	0.28587	5.3577	1.84237	2.34155
gi|472585524	RHTO_07417	conserved hypothetical protein	1	1	2	1	1	2	0.79116	0.71075	0.58372	0.9293	0.41576	0.57412	2.18386	0.382836
gi|472585541	RHTO_07434	conserved hypothetical protein	7	11	11	7	11	11	0.076182	0.22296	0.32528	0.089498	5.4874	NaN	#VALUE!	#VALUE!
gi|472585580	RHTO_07473	conserved hypothetical protein	2	2	0	2	2	0	0.59381	0.53294	NaN	0.80787	1.0557	1.0977	0.857524	0.125321
gi|472585634	RHTO_07527	conserved hypothetical protein	2	1	1	2	1	1	0.2914	0.40229	0.44142	0.36488	2.4324	1.0299	0.911987	0.474139
gi|472585673	RHTO_07566	conserved hypothetical protein	5	2	3	2	1	1	0.73321	1.1945	1.2258	0.9557	0.8673	1.0172	1.08772	0.0915321
gi|472585704	RHTO_07597	conserved hypothetical protein	0	1	1	0	1	1	NaN	0.13263	0.76828	NaN	1.1743	0.89824	1.10059	0.242913
gi|472585711	RHTO_07604	conserved hypothetical protein	1	1	1	1	1	1	1.3422	1.6358	1.1583	1.4869	0.56849	0.18651	3.00402	2.04284
gi|472585717	RHTO_07610	conserved hypothetical protein	4	4	0	4	4	0	0.41946	0.42805	NaN	0.52156	0.89546	0.7121	1.25863	0.143814
gi|472585718	RHTO_07611	conserved hypothetical protein	1	1	1	1	1	1	0.33797	0.37219	0.33545	0.46059	1.0038	NaN	#VALUE!	#VALUE!
gi|472585726	RHTO_07619	conserved hypothetical protein	1	1	0	1	1	0	0.96174	0.88184	NaN	1.1371	0.18796	0.18141	5.49508	0.166829
gi|472585763	RHTO_07656	conserved hypothetical protein	5	4	6	5	4	6	0.57317	0.60292	0.66495	0.86631	1.319	2.6939	0.493861	0.229078
gi|472585822	RHTO_07098	conserved hypothetical protein	2	2	2	2	2	2	1.6922	0.96629	1.386	2.0491	1.275	0.86906	0.967491	0.259052
gi|472585834	RHTO_07110	conserved hypothetical protein	1	1	1	1	1	1	0.47352	0.77308	0.68268	0.59332	0.89666	0.91144	1.16961	0.110196
gi|472585845	RHTO_07121	conserved hypothetical protein	1	0	1	1	0	1	0.96536	NaN	1.9854	1.1675	NaN	NaN	#VALUE!	#VALUE!
gi|472585988	RHTO_07264	conserved hypothetical protein	1	2	1	1	2	1	0.31121	2.2475	4.4651	0.35615	1.181	NaN	0.773241	0.103944
gi|472586034	RHTO_07310	conserved hypothetical protein	1	2	2	1	2	2	0.70307	0.93224	0.84674	0.90884	0.5622	0.82424	1.55382	0.299968
gi|472586070	RHTO_07346	conserved hypothetical protein	2	0	1	2	0	1	0.2731	NaN	0.41597	0.39473	0.8498	NaN	1.82051	0.910415
gi|472586073	RHTO_07349	conserved hypothetical protein	2	0	0	2	0	0	0.5128	NaN	NaN	0.70889	1.4319	1.4439	0.72295	0.0476832
gi|472586144	RHTO_06731	conserved hypothetical protein	2	3	4	2	3	4	0.53811	0.69426	0.94609	0.66751	0.27269	NaN	2.62229	1.47768
gi|472586239	RHTO_06826	conserved hypothetical protein	3	5	4	3	5	4	1.6041	1.7964	1.7477	2.0036	1.5122	1.06	0.775326	0.148613
gi|472586240	RHTO_06827	conserved hypothetical protein	2	4	4	2	4	4	0.44575	0.61898	0.74528	0.58721	0.92753	1.0155	1.07424	0.0876153
gi|472586303	RHTO_06890	conserved hypothetical protein	0	1	1	0	1	1	NaN	1.1877	1.4658	NaN	1.1485	1.1011	0.860699	0.0531949
gi|472586322	RHTO_06909	conserved hypothetical protein	7	8	6	3	3	3	0.53239	0.70654	0.77995	0.65827	1.7565	1.2613	0.681073	0.158052
gi|472586329	RHTO_06916	conserved hypothetical protein	2	1	1	2	1	1	1.9702	NaN	NaN	2.5175	1.1613	1.1685	0.982557	0.214974
gi|472586372	RHTO_06959	conserved hypothetical protein	0	3	2	0	1	1	NaN	1.052	1.284	NaN	1.7682	2.0372	0.545488	0.0478528
gi|472586486	RHTO_06009	conserved hypothetical protein	6	4	5	6	4	5	0.7093	0.71871	0.78392	0.97255	0.78037	1.3353	1.01517	0.376568
gi|472586558	RHTO_06081	conserved hypothetical protein	0	0	2	0	0	2	NaN	NaN	2.1348	NaN	1.4402	1.0985	0.80234	0.152724
gi|472586561	RHTO_06084	conserved hypothetical protein	0	1	1	0	1	1	NaN	0.31127	0.26864	NaN	1.8989	1.0803	0.70128	0.204119
gi|472586576	RHTO_06099	conserved hypothetical protein	2	3	3	1	1	1	0.70575	1.0146	1.7131	0.84491	2.5854	1.5338	0.532902	0.134646
gi|472586583	RHTO_06106	conserved hypothetical protein	2	0	1	2	0	1	1.0758	NaN	0.55186	1.3806	NaN	1.5656	#VALUE!	#VALUE!
gi|472586621	RHTO_06144	conserved hypothetical protein	1	1	1	1	1	1	0.7548	0.2807	NaN	1.0419	0.39072	0.40513	2.15575	0.621931
gi|472586711	RHTO_06234	conserved hypothetical protein	1	1	2	1	1	2	0.34152	0.27552	0.72504	0.44473	0.80413	1.2949	1.09107	0.276184
gi|472586730	RHTO_06253	conserved hypothetical protein	3	2	1	3	2	1	0.52092	0.45881	0.43095	0.69894	0.58311	1.3303	1.18978	0.487487
gi|472586752	RHTO_06275	conserved hypothetical protein	3	2	1	3	2	1	0.35994	0.79485	1.0253	0.44261	1.2317	1.6762	0.723556	0.11273
gi|472586783	RHTO_06306	conserved hypothetical protein	0	3	3	0	3	3	NaN	1.1357	1.3299	NaN	2.1261	2.1684	0.465757	0.00648787
gi|472586817	RHTO_06340	conserved hypothetical protein	1	1	0	1	1	0	1.1603	2.6295	NaN	1.6263	1.1608	1.1252	0.702975	0.298446
gi|472586824	RHTO_06347	conserved hypothetical protein	1	0	3	1	0	2	2.3707	NaN	0.95901	3.0158	2.4907	1.6435	0.470229	0.11971
gi|472586862	RHTO_06385	conserved hypothetical protein	1	0	0	1	0	0	0.82832	NaN	NaN	0.88767	1.2544	1.1382	0.794881	0.0848798
gi|472586918	RHTO_04595	conserved hypothetical protein	6	7	8	3	5	5	0.27095	0.6359	0.31841	0.33094	1.4701	NaN	#VALUE!	#VALUE!
gi|472586921	RHTO_04598	conserved hypothetical protein	4	2	3	4	2	3	0.56675	0.85047	0.96529	0.74259	1.01	1.731	0.946872	0.349568
gi|472586946	RHTO_04624	conserved hypothetical protein	4	2	3	1	1	1	NaN	1.5845	1.5065	NaN	0.58907	0.84668	1.3319	0.318311
gi|472586969	RHTO_04647	conserved hypothetical protein	3	4	3	3	4	3	0.5167	0.64201	0.83708	0.69976	0.70321	1.0023	1.24595	0.221181
gi|472587022	RHTO_04700	conserved hypothetical protein	4	5	4	4	5	4	0.40949	0.46663	0.63166	0.516	0.81661	0.9712	1.07214	0.136256
gi|472587055	RHTO_04733	conserved hypothetical protein	1	1	1	1	1	1	0.60266	NaN	0.8767	0.78204	1.0906	0.72058	0.994913	0.360253
gi|472587067	RHTO_04746	conserved hypothetical protein	2	1	3	2	1	3	1.184	0.40896	1.0775	1.5758	1.226	1.6408	0.745471	0.11781
gi|472587079	RHTO_04757	conserved hypothetical protein	2	1	1	2	1	1	0.44989	0.66306	0.92676	0.58457	0.67274	0.82865	1.14907	0.369635
gi|472587149	RHTO_04827	conserved hypothetical protein	0	0	3	0	0	3	NaN	NaN	0.93369	NaN	11.149	0.46004	1.13171	1.47363
gi|472587200	RHTO_04879	conserved hypothetical protein	1	0	0	1	0	0	1.5763	NaN	NaN	1.9194	1.7001	4.3506	0.345752	0.210034
gi|472587214	RHTO_04893	conserved hypothetical protein	2	1	0	2	1	0	0.77817	1.5145	NaN	0.89002	1.3752	1.2034	0.742288	0.0821808
gi|472587219	RHTO_04898	conserved hypothetical protein	1	1	3	1	1	3	2.3241	1.8746	2.3214	3.5098	1.0548	1.2036	0.788489	0.184418
gi|472587280	RHTO_04959	conserved hypothetical protein	4	5	5	3	3	2	1.6341	1.2848	1.1679	2.0502	1.144	1.0162	0.948678	0.0645917
gi|472587296	RHTO_04975	conserved hypothetical protein	0	2	2	0	2	2	NaN	0.66577	0.58421	NaN	0.50856	0.46177	2.20862	0.266428
gi|472587341	RHTO_05020	conserved hypothetical protein	3	2	4	3	2	4	0.71199	0.75535	0.71684	0.82168	1.0102	0.80828	1.35356	0.433711
gi|472587464	RHTO_02686	conserved hypothetical protein	1	3	2	0	2	1	0.45464	0.96864	0.85623	0.60809	1.0367	0.70919	1.17733	0.223402
gi|472587495	RHTO_02717	conserved hypothetical protein	2	3	2	2	3	2	0.71822	0.92307	1.0834	0.89292	6.3826	NaN	0.658876	0.710218
gi|472587541	RHTO_02763	conserved hypothetical protein	1	3	3	1	3	3	1.1172	1.1566	0.96998	1.3385	0.95394	0.98277	0.987613	0.0799464
gi|472587563	RHTO_02786	conserved hypothetical protein	1	0	2	1	0	2	0.56169	NaN	0.69825	0.75645	1.2155	1.0773	0.921851	0.0961064
gi|472587600	RHTO_02823	conserved hypothetical protein	2	0	1	2	0	1	1.5308	NaN	2.9456	1.8189	NaN	1.3939	#VALUE!	#VALUE!
gi|472587609	RHTO_02832	conserved hypothetical protein	4	3	1	4	3	1	0.39704	0.66223	0.80661	0.5818	0.44244	0.53071	2.02004	0.208567
gi|472587610	RHTO_02833	conserved hypothetical protein	0	1	0	0	1	0	NaN	1.6289	NaN	NaN	0.5643	0.64528	1.65566	0.111567
gi|472587664	RHTO_02888	conserved hypothetical protein	4	4	3	1	1	1	1.3421	0.56649	0.9978	1.7798	1.1212	1.0586	0.887823	0.0589655
gi|472587694	RHTO_02918	conserved hypothetical protein	2	3	3	2	3	3	0.38067	0.84433	1.2934	0.4907	1.0908	1.1941	0.880664	0.0401303
gi|472587706	RHTO_02930	conserved hypothetical protein	1	2	1	1	1	0	0.63376	0.70562	0.93086	0.91697	1.3307	1.3215	0.786108	0.0555007
gi|472587775	RHTO_02999	conserved hypothetical protein	0	1	1	0	1	1	NaN	0.36583	2.4524	NaN	1.2336	NaN	#VALUE!	#VALUE!
gi|472587899	RHTO_03123	conserved hypothetical protein	1	0	1	1	0	1	0.93163	NaN	0.88455	1.0978	1.0078	1.1993	0.939545	0.0915612
gi|472587944	RHTO_03169	conserved hypothetical protein	1	0	0	1	0	0	0.099643	NaN	NaN	0.1214	1.3563	1.5661	0.736619	0.0977515
gi|472588014	RHTO_03239	conserved hypothetical protein	1	0	0	1	0	0	0.84389	NaN	NaN	0.99371	0.73672	0.74551	1.51571	0.288226
gi|472588300	RHTO_00200	conserved hypothetical protein	2	4	3	2	4	3	0.91863	1.3577	2.2682	1.2648	0.55777	0.6439	1.61232	0.159388
gi|472588303	RHTO_00203	conserved hypothetical protein	8	12	6	8	11	6	0.10668	0.16754	0.32454	0.1518	0.57721	0.35871	2.26012	0.746207
gi|472588441	RHTO_00341	conserved hypothetical protein	0	1	1	0	1	1	NaN	0.49339	0.65644	NaN	0.88411	0.28322	1.92202	1.39333
gi|472588472	RHTO_00372	conserved hypothetical protein	2	1	1	2	1	1	0.39507	0.56978	0.39839	0.53547	0.92978	0.81119	1.13573	0.0848393
gi|472588519	RHTO_00419	conserved hypothetical protein	0	1	1	0	1	1	NaN	NaN	1.2213	NaN	2.7736	2.6004	0.388806	0.0306103
gi|472588610	RHTO_00510	conserved hypothetical protein	1	0	1	1	0	1	0.88506	NaN	1.2787	1.0099	0.38562	2.2753	1.23675	1.18076
gi|472588692	RHTO_00592	conserved hypothetical protein	6	6	7	6	6	7	0.20003	0.2479	0.29684	0.28388	0.047587	0.056372	14.2218	9.07752
gi|472588709	RHTO_00609	conserved hypothetical protein	4	4	4	4	4	4	0.40377	0.41881	0.80273	0.49547	0.48761	0.43216	1.95224	0.419784
gi|472585276	RHTO_07700	conserved hypothetical protein	12	15	14	1	3	3	0.31671	0.33179	0.5706	0.43427	1.0437	1.0326	1.40691	0.7684
gi|472585385	RHTO_07809	conserved leucine-rich repeat protein	0	1	0	0	1	0	NaN	1.3819	NaN	NaN	NaN	1.0929	0.974974	0.0848199
gi|472584675	RHTO_01015	conserved membrane protein	1	1	1	1	1	1	0.94614	1.8061	1.2912	1.1825	0.97866	1.4814	0.848421	0.245202
gi|472585074	RHTO_07993	conserved mitochondrial protein	3	0	0	3	0	0	0.70826	NaN	NaN	0.87402	1.0978	1.2284	0.824233	0.0820702
gi|472588688	RHTO_00588	COP9 signalosome complex subunit 1	3	4	3	3	4	3	1.3468	1.3676	1.8488	1.565	0.57612	1.0739	1.48477	0.480112
gi|472580363	RHTO_06611	COP9 signalosome complex subunit 2	3	4	4	3	4	4	0.67092	1.1601	1.5178	0.81199	0.94047	0.92994	1.13285	0.11021
gi|472582075	RHTO_04069	COP9 signalosome complex subunit 3	1	1	3	0	0	1	0.66877	3.2892	0.99022	0.87457	1.1446	1.0912	0.91854	0.0459681
gi|472585404	RHTO_07828	COP9 signalosome complex subunit 4	2	6	6	2	3	3	0.57764	0.90395	0.88668	0.87551	0.72705	NaN	1.52738	0.214907
gi|472584238	RHTO_01491	COP9 signalosome complex subunit 5	1	3	5	1	1	1	0.57861	0.56657	0.90751	0.78049	0.74992	NaN	1.43745	0.147043
gi|472586079	RHTO_07355	COP9 signalosome complex subunit 6	0	2	2	0	2	2	NaN	1.0073	1.64	NaN	1.1794	NaN	0.612006	0.333588
gi|472581287	RHTO_05403	COP9 signalosome complex subunit 7	2	1	1	2	1	1	0.69777	0.49609	NaN	0.90182	0.44226	0.3793	2.32563	0.284093
gi|472580435	RHTO_06536	COPI vesicle coat beta' subunit	14	14	13	14	14	13	0.83698	1.157	1.4021	1.2252	0.97573	1.0809	1.00943	0.0777174
gi|472586467	RHTO_07054	COPII vesicle coat protein Sec16	10	12	11	10	12	11	0.57379	0.69556	1.0688	0.6395	0.25276	0.38134	3.37761	0.684297
gi|472581134	RHTO_05451	COPII-coated vesicle membrane protein	2	3	4	2	3	4	0.68122	1.1465	0.89114	0.89011	NaN	0.36207	1.9111	1.20321
gi|472582131	RHTO_04125	COPII-coated vesicle protein SurF4/Erv29	3	3	2	3	3	2	0.43397	0.45816	0.48701	0.55374	1.7583	NaN	0.637	0.0965464
gi|472587615	RHTO_02838	copper transporter	2	3	3	2	3	3	0.56703	1.7412	1.0878	0.70306	1.304	1.299	0.767757	0.00179509
gi|472582558	RHTO_03472	coproporphyrinogen III oxidase	4	4	3	4	4	3	0.91037	0.79899	1.1232	1.3894	0.63449	0.72759	1.53424	0.143565
gi|472587859	RHTO_03083	CorA family metal ion transporter	2	2	5	2	2	5	1.1491	1.2792	0.95761	1.339	0.9255	0.61087	1.48426	0.353102
gi|472587860	RHTO_03084	CORD and CS domain containing protein	4	4	5	4	4	5	0.83109	1.0761	1.26	1.1871	1.1917	1.2822	0.842768	0.0647497
gi|472584976	RHTO_00830	coronin 7	9	5	8	5	2	3	0.67551	0.6732	0.67502	0.82151	0.96328	0.65053	1.19265	0.298922
gi|472584738	RHTO_01078	COX1 assembly protein, Shy1	5	1	3	0	0	1	NaN	NaN	0.58835	NaN	NaN	NaN	#VALUE!	#VALUE!
gi|472585688	RHTO_07581	Cox20/FAM36A family protein	1	1	0	1	1	0	0.67367	0.89301	NaN	0.81301	3.3736	NaN	#VALUE!	#VALUE!
gi|472586291	RHTO_06878	CRAL/TRIO domain protein	2	3	2	2	3	2	0.27468	0.25838	0.41885	0.30146	NaN	2.1482	#VALUE!	#VALUE!
gi|472588457	RHTO_00357	CRAL/TRIO domain-containing protein	5	10	7	5	10	7	0.45977	0.66534	0.92577	0.59553	0.92781	0.7244	1.30541	0.200881
gi|472583101	RHTO_02370	craniofacial development protein 1	1	2	2	1	2	2	0.91135	1.0028	1.4449	1.4125	0.62032	0.99376	1.28214	0.306493
gi|472583877	RHTO_01553	CsbD-like family protein	1	4	3	1	4	3	NaN	0.25431	5.332	NaN	0.99825	0.92387	1.06143	0.0524368
gi|472581206	RHTO_05523	C-signal	6	7	6	6	7	6	0.29828	0.32836	0.58896	0.41588	1.6217	1.9173	0.555628	0.0529547
gi|472583444	RHTO_01947	CTP synthase	11	13	14	11	13	14	0.94381	0.85224	1.0985	1.3999	0.76365	0.86774	1.26388	0.0970547
gi|472587742	RHTO_02966	Cu2+-exporting ATPase	2	2	2	2	2	2	0.60819	2.0889	1.1601	0.73862	0.49259	0.65485	2.17025	0.723521
gi|472585546	RHTO_07439	cullin 1	12	15	14	12	15	14	0.693	0.79149	1.0676	0.88727	1.3369	1.2276	0.833855	0.0969295
gi|472588152	RHTO_00052	cullin 3	4	5	4	4	5	4	0.58451	1.1839	0.91569	0.748	0.80131	NaN	#VALUE!	#VALUE!
gi|472585198	RHTO_08117	cullin 4	1	2	2	1	2	2	0.41167	0.55722	0.25075	0.52872	1.0833	1.2408	0.920737	0.11364
gi|472580314	RHTO_06672	cullin-associated NEDD8-dissociated protein 1	24	23	21	24	23	21	0.57664	0.75629	0.82297	0.79691	1.1902	1.2588	0.831853	0.0340494
gi|472585312	RHTO_07736	Cupin domain protein	1	2	1	1	2	1	NaN	0.76488	NaN	NaN	0.84229	1.2372	0.761173	0.451466
gi|472581795	RHTO_04284	cyanate hydratase	2	1	1	2	1	1	0.13085	0.18355	0.20226	0.17691	1.049	1.0543	0.963863	0.0225934
gi|472585137	RHTO_08056	cyclic-nucleotide phosphodiesterase	1	2	1	1	2	1	2.5495	1.1906	2.8003	2.8391	0.88823	1.1518	0.982322	0.131306
gi|472586736	RHTO_06259	cyclin H	0	1	1	0	1	1	NaN	1.1302	1.275	NaN	NaN	0.85771	1.37349	0.293578
gi|472588255	RHTO_00155	cyclophilin, peptidyl-prolyl cis-trans isomerase	9	10	9	8	8	8	0.48574	0.51282	0.90362	0.59898	2.0252	1.741	0.548621	0.0475237
gi|472586686	RHTO_06209	cyclophilin-RNA interacting protein	1	1	0	1	1	0	0.32634	0.80859	NaN	0.4058	0.18601	0.31265	3.93264	1.25009
gi|472583618	RHTO_02122	cystathionine beta-lyase	12	19	19	3	5	5	1.0656	1.2455	1.5673	1.2855	NaN	NaN	#VALUE!	#VALUE!
gi|472588124	RHTO_00024	cystathionine beta-synthase	1	1	1	1	0	1	0.47977	0.24028	NaN	0.63395	0.79545	1.5737	1.0528	0.361462
gi|472584268	RHTO_01521	cystathionine beta-synthase (beta-thionase)	3	3	3	3	3	3	1.0332	1.3981	1.1673	1.3864	0.9774	1.5889	0.83459	0.197408
gi|472584245	RHTO_01498	cystathionine gamma-lyase	7	6	3	5	5	2	0.71233	0.86228	1.0849	0.86219	0.93052	1.0702	0.925393	0.153979
gi|472581103	RHTO_05605	cystathionine gamma-synthase	5	5	3	5	5	3	0.9564	1.1037	1.248	1.245	1.6671	1.6583	0.634335	0.0570052
gi|472584961	RHTO_00815	cystathionine gamma-synthase	0	2	2	0	2	2	NaN	1.4452	1.2272	NaN	1.2477	1.4421	0.747454	0.0763969
gi|472583646	RHTO_01735	cysteine desulfurase	13	14	12	13	14	12	0.60707	1.0606	1.2682	0.8125	1.0894	1.0142	0.984756	0.0662065
gi|472586590	RHTO_06113	cysteine synthase	9	7	13	9	7	13	1.3787	1.5968	2.1679	1.724	0.76983	1.1868	1.27295	0.417938
gi|472586616	RHTO_06139	cysteine synthase	0	3	3	0	2	3	NaN	0.65951	1.3043	NaN	0.5631	1.0248	1.64397	0.612949
gi|472585058	RHTO_07977	cysteine-rich PDZ-binding protein	0	1	1	0	1	1	NaN	1.1058	1.0398	NaN	NaN	1.5584	#VALUE!	#VALUE!
gi|472585293	RHTO_07717	cysteinyl-trna synthetase	10	11	10	2	3	2	1.0649	1.6843	1.0509	1.5348	0.88078	0.87689	1.1885	0.0877248
gi|472581352	RHTO_05254	cytidylyltransferase family protein	1	2	1	1	2	1	1.4016	2.1193	1.5385	1.7859	1.3277	1.6855	0.702659	0.0948025
gi|472581858	RHTO_04348	cytochrome b mrna processing protein, CBP4	0	0	1	0	0	1	NaN	NaN	1.7598	NaN	1.0475	NaN	#VALUE!	#VALUE!
gi|472584927	RHTO_00781	cytochrome b5	3	2	2	1	0	1	0.51207	0.3283	0.3883	0.69467	0.71695	0.89829	1.12466	0.264609
gi|472584359	RHTO_01168	cytochrome b5 type b (outer mitochondrial membrane)	7	8	8	7	8	8	0.62792	0.76954	1.4044	0.79531	1.146	0.64706	1.20903	0.475778
gi|472583785	RHTO_01875	cytochrome b-c1 complex, subunit 10	4	4	4	4	4	4	0.6897	0.58627	1.3301	0.90688	1.0533	1.1287	1.03211	0.200716
gi|472581527	RHTO_05208	cytochrome c	12	12	12	12	12	12	0.9951	1.1825	2.0076	1.312	3.2064	0.6614	0.836815	0.61397
gi|472584910	RHTO_00764	cytochrome c oxidase assembly protein	0	1	1	0	1	1	NaN	1.4449	1.9153	NaN	0.74498	NaN	1.38076	0.0543672
gi|472586435	RHTO_07022	cytochrome c oxidase assembly protein	3	3	2	3	3	2	2.298	0.86358	1.1484	2.7877	NaN	1.4251	#VALUE!	#VALUE!
gi|472586316	RHTO_06903	cytochrome c oxidase assembly protein COX15	3	7	6	3	7	6	1.8515	2.3103	1.8451	2.4954	1.118	0.87134	1.09844	0.184366
gi|472587662	RHTO_02886	cytochrome c oxidase assembly protein COX19	1	1	2	1	1	2	0.90496	0.88235	1.062	1.4107	1.1476	1.2804	0.832518	0.0464973
gi|472584051	RHTO_01727	cytochrome c oxidase biogenesis protein Cmc1-like	0	2	0	0	2	0	NaN	1.1825	NaN	NaN	1.603	1.226	0.706649	0.0985609
gi|472583764	RHTO_01854	cytochrome c oxidase subunit IV	8	8	5	8	8	5	0.59554	0.70895	1.8769	0.78566	1.1346	0.87637	1.34215	0.587711
gi|472582446	RHTO_03666	cytochrome c oxidase subunit Va	8	7	6	8	7	6	0.66888	0.51905	1.0343	0.89523	1.0048	1.1726	1.07358	0.268659
gi|472580583	RHTO_06415	cytochrome c oxidase subunit VIb	4	4	4	4	4	4	0.57329	0.67427	1.1181	0.75867	0.50251	1.4743	1.10117	0.770062
gi|472586900	RHTO_04577	cytochrome c oxidase, subunit Vb	1	3	4	1	3	4	0.72202	0.64995	0.99224	1.0393	1.2594	NaN	#VALUE!	#VALUE!
gi|472583929	RHTO_01605	cytochrome c oxidase, subunit VIa	2	2	1	2	2	1	1.1039	0.99065	0.87692	1.4705	1.2063	1.1025	0.868005	0.0551885
gi|472583331	RHTO_02218	cytochrome c oxidase, subunit VIb	3	1	1	3	1	1	0.865	0.89993	1.5733	1.2326	1.3883	0.98128	0.834461	0.161368
gi|472584901	RHTO_00755	cytochrome c oxidase, subunit VIIa	1	1	2	1	1	2	0.92667	0.61201	0.94982	1.3263	1.4699	1.2459	0.802759	0.122504
gi|472584902	RHTO_00756	cytochrome c oxidase, subunit VIIa	1	1	1	1	1	1	NaN	11.365	0.55116	NaN	1.3045	0.67911	0.867142	0.561882
gi|472587231	RHTO_04910	cytochrome c oxidase, subunit VIIa	1	2	1	1	2	1	3.8854	1.4502	4.3933	4.562	0.79159	0.99851	1.20965	0.187198
gi|472581909	RHTO_04152	cytochrome c1	12	12	14	12	12	14	1.2005	1.3204	1.3008	1.4954	1.8457	1.1388	1.40639	1.21791
gi|472582579	RHTO_03493	cytochrome oxidase complex assembly protein	1	2	3	1	2	3	1.5375	1.0166	1.525	1.7048	1.483	1.7623	0.658063	0.0836908
gi|472586786	RHTO_06309	cytochrome p450 oxidoreductase	19	16	16	19	16	16	0.86622	1.0327	1.1233	1.0123	1.4971	1.0363	0.76575	0.172541
gi|472586246	RHTO_06833	cytochrome P450, family 3, subfamily A	3	6	6	3	6	6	0.36058	0.47847	0.51098	0.40097	1.7443	1.4362	0.606797	0.0783075
gi|472586860	RHTO_06383	cytochrome P450, family 46, subfamily A (cholesterol 24(S)-hydroxylase)	1	1	2	1	1	2	0.44392	0.91666	0.83997	0.54538	1.3018	1.0677	0.927089	0.15439
gi|472582375	RHTO_03865	cytochrome P450, family 51 (sterol 14-demethylase)	9	8	10	9	8	10	0.63642	0.99596	0.79617	0.86405	1.0656	0.86244	1.06235	0.112935
gi|472588264	RHTO_00164	cytochrome P450, family 8, subfamily B (sterol 12-alpha-hydroxylase)	1	2	0	1	2	0	0.71103	5.7471	NaN	0.86127	0.8176	0.79515	1.36385	0.214585
gi|472580520	RHTO_06455	cytochrome-b5 reductase	19	18	20	19	18	20	0.77614	0.77049	1.2084	1.1148	0.68834	0.66381	1.74802	0.465665
gi|472586708	RHTO_06231	cytochrome-b5 reductase	11	12	11	11	12	11	0.76035	0.82089	1.0136	0.98561	0.70035	1.1469	1.17224	0.280655
gi|472587193	RHTO_04872	cytochrome-b5 reductase	0	0	2	0	0	2	NaN	NaN	1.397	NaN	NaN	NaN	#VALUE!	#VALUE!
gi|472585558	RHTO_07451	cytochrome-c peroxidase	7	10	10	7	10	10	0.35772	0.42678	0.58285	0.52201	1.201	1.9405	0.760675	0.218441
gi|472586670	RHTO_06193	cytochrome-c peroxidase	20	23	23	20	23	23	0.4778	0.40615	0.65297	0.60784	1.0394	1.0465	0.998686	0.0691108
gi|472582185	RHTO_03925	cytoplasm protein	5	4	1	1	1	0	1.0035	0.90995	1.1439	1.2093	0.75675	0.78693	1.37788	0.143901
gi|472586012	RHTO_07288	cytoplasmic dynein heavy chain 1	5	8	10	5	8	10	0.95192	1.086	1.2824	1.1264	NaN	NaN	#VALUE!	#VALUE!
gi|472587351	RHTO_05030	cytoplasmic dynein light intermediate chain 1	3	3	3	3	3	3	0.97345	1.2173	1.4009	1.1763	1.3583	1.1318	0.810418	0.0736728
gi|472582354	RHTO_03844	cytoplasmic tRNA 2-thiolation protein 1	0	1	0	0	1	0	NaN	1.1241	NaN	NaN	1.0612	0.9738	0.97536	0.0452253
gi|472585079	RHTO_07998	cytosine deaminase	1	1	3	1	1	2	0.79452	0.81884	1.1082	1.0075	1.0523	0.9193	1.08464	0.132803
gi|472583141	RHTO_02411	cytosine-purine permease	1	2	2	1	2	2	0.99588	1.1944	1.4311	1.199	1.2271	1.2523	0.826921	0.0359199
gi|472583306	RHTO_02236	cytoskeleton assembly control protein Sla1	2	2	4	2	2	4	0.41971	0.65721	0.73267	0.54101	1.4192	2.2119	0.844958	0.47871
gi|472582654	RHTO_03568	cytoskeleton assembly control protein Sla2	15	18	19	2	2	4	0.49673	0.55353	0.65956	0.67066	2.1262	2.2049	0.461929	0.0118704
gi|472582346	RHTO_03836	cytosolic Fe-S cluster assembly factor NAR1	0	1	2	0	1	2	NaN	0.49276	0.33491	NaN	0.7966	0.94804	1.14402	0.102074
gi|472586732	RHTO_06255	cytosolic iron-sulfur protein assembly protein 1	4	2	2	4	2	2	0.70195	0.70952	0.28507	0.90566	0.44552	0.62499	1.91224	0.322742
gi|472582481	RHTO_03701	cytosolic nonspecific dipeptidase	5	7	9	5	7	9	0.76838	0.84614	0.84964	0.91	0.76419	0.93388	1.21063	0.124298
gi|472588379	RHTO_00279	D-3-phosphoglycerate dehydrogenase	21	24	22	21	24	22	1.7492	2.2855	2.786	2.3735	1.402	1.3187	0.715938	0.0411144
gi|472584923	RHTO_00777	D-4,5 unsaturated β-glucuronyl hydrolase, glycoside hydrolase family 88 protein	1	1	1	1	1	1	1.1636	0.34071	2.445	1.476	1.0781	1.3659	0.829838	0.138197
gi|472585420	RHTO_07844	D-arabinitol dehydrogenase	2	2	1	2	2	1	0.20021	0.040055	0.064759	0.25563	1.5087	1.4769	0.736494	0.115464
gi|472581077	RHTO_05579	D-arabinose 1-dehydrogenase	10	6	4	10	6	4	0.5347	0.41359	0.58916	0.67027	NaN	1.4028	0.68605	0.0379156
gi|472588584	RHTO_00484	DASH complex subunit ASK1	4	3	2	4	3	2	0.33558	0.87488	1.0361	0.43589	1.7622	2.0032	0.667055	0.234109
gi|472582408	RHTO_03627	DASH complex, subunit Duo1	1	0	1	1	0	1	0.75802	NaN	1.2251	0.96623	1.0034	1.0652	1.03773	0.124699
gi|472583394	RHTO_02194	DASH complex, subunit Spc34	0	3	1	0	3	1	NaN	0.7512	1.2891	NaN	1.9239	1.1903	0.705044	0.165965
gi|472588339	RHTO_00239	dCMP deaminase	1	1	1	1	1	1	1.0634	1.0243	1.2925	1.3374	1.0692	0.69043	1.16081	0.262111
gi|472581542	RHTO_05223	DDHD domain containing protein	2	2	2	2	2	2	0.46087	0.50985	1.1039	0.55948	2.2105	2.2106	0.428898	0.0406653
gi|472583968	RHTO_01644	DDT domain-containing protein	9	11	10	9	11	10	0.60844	0.77531	0.99055	0.7937	0.87673	1.2748	0.976375	0.179692
gi|472587727	RHTO_02951	DEAD (asp-glu-ala-asp) box containing, RNA helicase	4	4	4	4	4	4	0.75631	1.0169	1.2018	1.0357	1.0474	NaN	#VALUE!	#VALUE!
gi|472585189	RHTO_08108	dedicator of cytokinesis 3/4/5	2	2	0	2	2	0	0.49214	0.65963	NaN	0.59547	2.0239	1.4741	0.674176	0.178015
gi|472586479	RHTO_06002	delta(3,5)-Delta(2,4)-dienoyl-CoA isomerase	1	1	1	1	1	1	0.47714	0.70659	NaN	0.64875	1.4203	1.0873	0.836065	0.11566
gi|472580437	RHTO_06538	delta-12 fatty acid desaturase	7	7	5	3	2	0	2.0849	0.97132	NaN	2.6587	NaN	NaN	#VALUE!	#VALUE!
gi|472586102	RHTO_07378	delta-1-pyrroline-5-carboxylate dehydrogenase	7	7	9	7	7	9	0.39214	0.34229	0.37239	0.48092	NaN	0.64119	1.28029	0.39501
gi|472585735	RHTO_07628	delta24(24(1))-sterol reductase	4	2	4	4	2	4	0.67569	0.82677	0.94396	0.92741	0.78071	0.47921	1.26057	0.836547
gi|472582172	RHTO_03911	delta-9 fatty acid desaturase	5	8	3	1	2	0	0.21264	0.24225	0.43934	0.28136	1.078	NaN	0.859079	0.0969655
gi|472583015	RHTO_02625	DENN domain protein	1	0	1	1	0	1	0.71482	NaN	0.34447	0.94313	2.3919	1.1757	0.771469	0.321235
gi|472586009	RHTO_07285	deoxyhypusine monooxygenase	1	1	0	1	1	0	0.95502	1.6577	NaN	1.4179	1.1492	0.85735	1.00425	0.150088
gi|472586345	RHTO_06932	deoxyhypusine synthase	2	2	2	2	2	2	1.0478	1.2352	1.3242	1.3045	1.5454	0.79607	0.844378	0.356727
gi|472583073	RHTO_02341	Derl-like domain member 2	1	1	1	1	1	1	0.45016	0.83996	0.57674	0.57628	1.1463	0.87085	0.896003	0.241354
gi|472585827	RHTO_07103	developmentally regulated GTP-binding protein 2	4	3	6	4	3	6	0.8585	1.0743	1.2604	1.0998	1.7564	1.6691	0.642572	0.102132
gi|472588376	RHTO_00276	diacylglycerol cholinephosphotransferase	4	4	6	4	4	6	0.77019	0.89195	0.71329	0.99738	0.80696	1.1126	1.14848	0.218907
gi|472582110	RHTO_04104	diamine N-acetyltransferase	0	2	0	0	2	0	NaN	3.2819	NaN	NaN	0.77167	0.586	1.4524	0.222007
gi|472584306	RHTO_01114	diamine N-acetyltransferase	4	3	7	0	0	1	NaN	NaN	2.0599	NaN	1.5727	0.72571	1.06252	0.383356
gi|472587904	RHTO_03128	diaminohydroxyphosphoribosylamino-pyrimidine deaminase	1	1	1	1	1	1	0.51445	0.72748	0.58298	0.68589	0.69589	0.88032	1.26271	0.156055
gi|472581141	RHTO_05458	dienelactone hydrolase family protein	9	7	7	9	7	7	0.67644	0.51782	0.93533	0.81428	1.6903	1.1261	0.747799	0.148849
gi|472586995	RHTO_04673	differentiation regulator, Nrd1	9	7	7	9	7	7	0.68691	0.91768	0.99803	0.90898	1.906	2.1319	0.49359	0.0283689
gi|472584616	RHTO_00956	digestive organ expansion factor	5	4	7	5	4	7	1.6053	1.3528	2.1182	1.8915	2.2425	1.0724	0.750035	0.265111
gi|472584237	RHTO_01490	dihydrodiol dehydrogenase / D-xylose 2-dehydrogenase (NADP)	6	5	5	6	5	5	0.61062	0.67788	1.0094	0.75204	0.80433	NaN	1.05163	0.271018
gi|472580795	RHTO_05820	dihydrodipicolinate synthase	3	1	2	3	1	2	0.28203	0.44092	0.6524	0.33857	0.3029	NaN	1.88841	1.9983
gi|472582994	RHTO_02604	dihydrofolate reductase	1	3	2	1	3	2	0.86696	1.1262	1.3035	1.065	0.67957	0.65457	1.45256	0.0862095
gi|472583369	RHTO_02268	dihydrofolate reductase	2	2	1	0	1	0	NaN	0.7529	NaN	NaN	0.96246	0.74777	1.05088	0.280675
gi|472585468	RHTO_07893	dihydrolipoyl dehydrogenase	17	23	25	17	23	25	0.71984	0.91341	1.2594	0.96789	NaN	1.2881	#VALUE!	#VALUE!
gi|472587012	RHTO_04690	dihydroorotase	3	3	2	3	3	2	2.8096	0.7622	1.3886	3.4722	0.80684	0.68422	1.42166	0.16596
gi|472581516	RHTO_05197	dihydroorotate oxidase	6	8	10	6	8	10	0.74195	0.78349	1.0826	1.0103	0.74494	0.57795	1.51966	0.196068
gi|472580298	RHTO_06694	dihydroxy-acid dehydratase	16	13	15	16	13	15	0.7564	0.73773	1.212	1.0494	1.4933	1.1371	0.880849	0.211904
gi|472585143	RHTO_08062	dihydroxy-acid dehydratase	3	1	3	3	1	3	0.50681	NaN	0.81087	0.63248	0.65562	0.81731	1.30257	0.195555
gi|472584936	RHTO_00790	dimethyladenosine transferase	5	8	9	5	8	9	1.4499	1.878	1.7582	1.731	1.7156	1.4274	0.665865	0.0721802
gi|472581329	RHTO_05231	dimethylaniline monooxygenase (N-oxide forming)	5	8	5	5	8	5	0.26284	0.17221	0.34698	0.31023	1.2951	1.0473	0.89571	0.107047
gi|472587663	RHTO_02887	dimethylaniline monooxygenase (N-oxide forming)	1	1	1	1	1	1	0.31193	NaN	NaN	0.37334	NaN	0.50258	#VALUE!	#VALUE!
gi|472586993	RHTO_04671	dipeptidyl-peptidase	3	5	2	3	5	2	0.64537	0.73422	1.7265	0.79002	0.8104	0.93391	1.14647	0.0822324
gi|472584786	RHTO_00640	dipeptidyl-peptidase III	19	13	15	18	13	15	0.9442	0.90049	1.7053	1.1747	1.885	NaN	#VALUE!	#VALUE!
gi|472586482	RHTO_06005	diphosphomevalonate decarboxylase	8	9	10	8	9	10	0.88333	0.78753	1.2047	1.3036	1.0222	0.99816	1.07283	0.143837
gi|472587080	RHTO_04758	diphthamide synthesis protein	3	1	1	2	0	0	1.0664	1.2839	1.5107	1.4283	0.91297	0.7944	1.20856	0.0982731
gi|472582896	RHTO_02506	diphthine synthase	0	3	4	0	3	4	NaN	1.1641	1.4887	NaN	1.2019	0.84298	1.09489	0.231152
gi|472584265	RHTO_01518	D-isomer specific 2-hydroxyacid dehydrogenase	4	9	10	4	9	10	0.75695	0.92272	1.0404	0.95208	0.36431	NaN	#VALUE!	#VALUE!
gi|472588514	RHTO_00414	DJ-1 family protein	4	4	4	1	1	1	0.43975	0.71765	1.29	0.59621	0.51586	NaN	1.65265	0.404266
gi|472582816	RHTO_03406	D-lactaldehyde dehydrogenase	5	2	2	5	2	2	0.31412	0.53584	1.1235	0.45867	0.83388	1.1065	1.01842	0.158443
gi|472586740	RHTO_06263	D-lactate dehydrogenase	1	0	2	1	0	2	NaN	NaN	1.5459	NaN	0.70608	NaN	#VALUE!	#VALUE!
gi|472586829	RHTO_06352	D-lactate dehydrogenase	2	2	2	2	2	2	0.58259	0.71906	0.92731	0.77534	1.2388	0.98453	0.865387	0.131292
gi|472583035	RHTO_02645	D-lactate dehydrogenase 2, mitochondrial precursor	8	11	12	0	1	1	0.89704	1.1708	1.7422	1.3132	0.24184	0.14679	5.26342	1.38741
gi|472581864	RHTO_04354	DNA damage response protein	0	1	0	0	1	0	NaN	0.88061	NaN	NaN	0.84325	0.63912	1.60998	0.448473
gi|472585706	RHTO_07599	DNA damage-binding protein 1	3	9	5	3	9	5	0.87301	0.61581	0.95974	1.1548	0.88134	0.91656	1.18117	0.120347
gi|472586049	RHTO_07325	DNA damage-inducible v-SNARE binding protein Ddi1	0	2	1	0	2	1	NaN	0.95067	0.66215	NaN	0.69334	0.88527	1.44741	0.320406
gi|472585176	RHTO_08095	DNA dependent ATPase	1	1	1	1	1	1	0.69948	0.89343	1.1744	0.79304	0.41242	0.16997	3.50502	2.0626
gi|472585774	RHTO_07667	DNA excision repair protein ERCC-2	1	3	1	1	3	1	1.1989	3.051	0.6151	1.4564	0.86834	NaN	1.99614	1.19433
gi|472587034	RHTO_04712	DNA excision repair protein ERCC-3	4	2	1	4	2	1	0.59279	0.60666	NaN	0.70462	0.57914	0.25588	2.35465	1.35351
gi|472585343	RHTO_07767	DNA helicase	0	0	1	0	0	1	NaN	NaN	1.5736	NaN	0.39627	NaN	1.8431	0.962275
gi|472581182	RHTO_05499	DNA ligase	3	4	2	3	4	2	0.67474	1.099	0.96493	0.79796	0.41979	0.33603	2.46407	0.476211
gi|472583956	RHTO_01632	DNA ligase	8	8	5	8	8	5	0.80412	1.0318	1.3603	1.1832	NaN	NaN	#VALUE!	#VALUE!
gi|472583012	RHTO_02622	DNA methyltransferase 1-associated protein 1	2	5	4	2	5	4	1.2136	1.4281	1.2883	1.4696	0.96065	1.0253	0.879109	0.22589
gi|472584126	RHTO_01379	DNA mismatch repair protein MSH2	2	3	4	2	3	4	0.3701	0.97938	0.9457	0.499	NaN	NaN	#VALUE!	#VALUE!
gi|472583325	RHTO_02195	DNA mismatch repair protein MSH6	5	6	4	5	6	4	0.61009	0.96473	1.2927	0.72849	1.1408	1.0116	0.924074	0.057873
gi|472585068	RHTO_07987	DNA mismatch repair protein MutS	3	3	3	1	2	1	1.5706	0.36857	1.401	1.5743	1.266	1.0311	0.733289	0.269346
gi|472581497	RHTO_05178	DNA mismatch repair protein PMS2	1	1	0	1	1	0	NaN	1.3713	NaN	NaN	2.0144	0.99561	0.795238	0.265591
gi|472584287	RHTO_01095	DNA polymerase alpha catalytic subunit (partial sequence c terminus)	1	2	2	0	1	1	NaN	1.0189	1.1696	NaN	1.6345	NaN	#VALUE!	#VALUE!
gi|472586844	RHTO_06367	DNA polymerase alpha subunit A	4	8	6	3	7	5	1.0073	1.3755	0.99206	1.3089	0.81512	NaN	#VALUE!	#VALUE!
gi|472580748	RHTO_05923	DNA polymerase alpha subunit B	1	1	2	1	1	2	0.82789	1.3056	1.1665	1.0807	0.8743	0.82807	1.10645	0.124115
gi|472583050	RHTO_02660	DNA polymerase delta subunit 1	1	4	1	1	4	1	1.7953	1.1021	0.99383	2.7599	0.37691	0.39949	2.39964	0.318193
gi|472586484	RHTO_06007	DNA polymerase epsilon p12 subunit (dna polymerase epsilon subunit 4)	5	2	1	2	1	0	0.55832	0.63667	0.94167	0.73304	1.3542	1.1717	0.792586	0.0578034
gi|472584195	RHTO_01448	DNA polymerase epsilon subunit 1	2	3	3	2	3	3	0.27155	1.4189	1.1703	0.35724	1.4689	0.87037	0.884594	0.239876
gi|472580787	RHTO_05812	DNA polymerase epsilon subunit 3	5	5	6	5	5	6	1.0333	1.3077	1.9969	1.3653	0.93228	1.0936	0.913733	0.159247
gi|472584977	RHTO_00831	DNA polymerase gamma subunit 1	2	4	2	2	4	2	1.1359	1.3486	1.1227	1.5053	1.3509	1.5465	0.880945	0.328134
gi|472587693	RHTO_02917	DNA polymerase phi subunit	9	14	15	9	14	15	1.33	1.4236	1.3501	1.8155	1.3503	0.99646	0.867377	0.131739
gi|472585060	RHTO_07979	DNA primase large subunit	1	1	1	1	1	1	0.75348	1.0593	1.1149	0.92893	1.9886	1.2665	0.667608	0.148064
gi|472584836	RHTO_00690	DNA primase small subunit	2	2	1	2	2	1	0.79116	0.98064	0.87985	0.91818	0.83697	0.52568	1.54854	0.500287
gi|472588597	RHTO_00497	DNA repair protein Nse1	2	2	2	2	2	2	0.47046	0.7698	0.75022	0.6208	1.148	0.94222	1.05459	0.180234
gi|472580908	RHTO_05778	DNA repair protein rad16	1	3	2	1	3	2	0.34387	0.68147	0.7463	0.43767	1.0405	1.4507	0.875813	0.161703
gi|472582642	RHTO_03556	DNA repair protein rad18	4	4	2	4	4	2	0.64851	0.65919	1.2301	0.82172	0.91335	1.6416	0.877915	0.246963
gi|472584655	RHTO_00995	DNA repair protein rad5	2	0	1	2	0	1	1.1184	NaN	NaN	1.4696	1.3054	1.1998	0.806689	0.0357841
gi|472585549	RHTO_07442	DNA repair protein rad50	1	3	2	1	3	2	0.73624	0.98249	1.9196	1.0706	1.275	1.0395	0.862217	0.090842
gi|472581893	RHTO_04136	DNA repair/transcription protein	4	2	3	4	2	3	0.67771	0.85084	1.1012	0.9273	NaN	0.47254	#VALUE!	#VALUE!
gi|472587017	RHTO_04695	DNA replication complex GINS protein PSF3	1	1	1	1	1	1	0.54415	0.63286	0.81615	0.64874	1.2128	1.1522	0.908796	0.11053
gi|472586948	RHTO_04626	DNA replication factor A subunit Ssb3	1	0	1	1	0	1	0.79397	NaN	NaN	1.0948	1.1959	0.54118	1.33611	0.505915
gi|472587392	RHTO_05071	DNA topoisomerase 2-associated protein PAT1	5	6	7	5	6	7	0.78408	1.111	1.1309	1.2323	0.96006	0.8277	1.08877	0.104162
gi|472586770	RHTO_06293	DNA topoisomerase I	10	11	11	10	11	11	0.79874	0.83233	1.0665	1.0451	NaN	0.78624	1.24096	0.0437259
gi|472580319	RHTO_06677	DNA topoisomerase II	5	5	2	5	5	2	0.65115	0.99923	0.75916	0.82247	0.84096	0.99998	1.04424	0.128605
gi|472583546	RHTO_02050	DNA/RNA helicase, DEAD/DEAH box type	32	39	33	5	8	5	0.88794	1.1363	1.3271	1.153	1.005	1.0506	0.903738	0.122629
gi|472584402	RHTO_01211	DNA/RNA helicase, DEAD/DEAH box type	2	3	3	2	3	3	0.61643	1.1389	2.0342	0.72561	0.88103	0.94721	1.11037	0.0473919
gi|472588438	RHTO_00338	DNA/RNA helicase, DEAD/DEAH box type	1	3	4	1	3	4	NaN	1.6797	2.0666	NaN	0.72675	0.95445	1.16679	0.181751
gi|472582786	RHTO_03376	DNA-binding protein	7	8	8	7	8	8	0.75785	0.81071	1.2364	0.89133	1.0519	1.1565	0.929746	0.0575361
gi|472585547	RHTO_07440	DNA-binding protein creA	2	5	2	2	3	2	0.44246	0.40074	0.67293	0.52851	2.7496	1.8626	0.44572	0.0869578
gi|472586485	RHTO_06008	DNA-binding SAP domain containing protein	13	11	12	13	11	12	0.63131	0.62846	0.98184	0.79839	0.5582	0.5516	1.84114	0.0683174
gi|472588518	RHTO_00418	DNA-directed RNA polymerase I subunit RPA1	12	15	10	2	2	1	1.0258	1.1525	1.4296	1.4788	1.7595	1.6807	0.58511	0.0145973
gi|472585064	RHTO_07983	DNA-directed RNA polymerase I subunit RPA12	0	1	1	0	1	1	NaN	0.96463	1.4369	NaN	1.372	1.5538	0.722579	0.0760491
gi|472587252	RHTO_04931	DNA-directed RNA polymerase I subunit RPA2	11	12	13	11	12	13	0.91682	1.2447	1.4799	1.15	1.2292	1.6511	0.655373	0.140086
gi|472584434	RHTO_01243	dna-directed rna polymerase i subunit rpa43	2	0	2	2	0	2	1.0682	NaN	1.3948	1.5169	1.8291	1.6683	0.577707	0.0275475
gi|472582742	RHTO_03332	DNA-directed RNA polymerase I subunit RPA49	3	5	3	3	5	3	0.8939	1.6501	1.9189	1.0701	2.5457	2.0939	0.424758	0.0460761
gi|472585095	RHTO_08014	DNA-directed RNA polymerase II subunit RPB1	8	12	10	8	12	10	0.72365	0.88189	1.0558	0.84904	1.9705	2.0095	0.494515	0.0147804
gi|472584538	RHTO_00878	DNA-directed RNA polymerase II subunit RPB2	6	10	10	6	10	10	1.0056	1.6397	1.3237	1.3241	1.1669	1.1472	0.859377	0.0113009
gi|472581470	RHTO_05151	DNA-directed RNA polymerase II subunit RPB3	2	2	2	2	2	2	0.66823	0.90074	0.68955	0.9101	1.2568	0.78742	0.997189	0.245048
gi|472581025	RHTO_05716	DNA-directed RNA polymerase II subunit RPB7	3	1	2	3	1	2	1.9384	1.9935	2.2537	2.6182	1.5536	1.2615	0.756499	0.0997842
gi|472583842	RHTO_01932	DNA-directed RNA polymerase II subunit RPB9	2	2	1	2	2	1	0.74911	0.72859	1.2188	0.99593	1.0198	NaN	1.32249	0.483525
gi|472581773	RHTO_04262	DNA-directed RNA polymerase III subunit RPC10	0	1	0	0	1	0	NaN	0.73476	NaN	NaN	1.3556	1.467	0.764185	0.0984854
gi|472582468	RHTO_03688	DNA-directed RNA polymerase III subunit RPC2	5	7	6	5	7	6	0.94327	1.8094	1.554	1.1764	0.81913	1.0792	1.06089	0.148764
gi|472583723	RHTO_01813	DNA-directed RNA polymerase III subunit RPC3	3	1	3	3	1	3	0.76933	1.119	1.1302	1.1307	0.61898	0.53659	2.15872	0.736469
gi|472587837	RHTO_03061	DNA-directed RNA polymerase III subunit Rpc31 family	2	0	0	2	0	0	0.49409	NaN	NaN	0.65578	0.43997	0.34979	2.60455	0.300549
gi|472583016	RHTO_02626	DNA-directed RNA polymerase III subunit RPC5-like	1	0	1	1	0	1	0.8095	NaN	0.73884	0.99903	0.48181	0.55187	1.78708	0.301673
gi|472580351	RHTO_06655	DNA-directed RNA polymerase III subunit RPC6	2	2	1	2	2	1	1.7059	0.69564	0.44944	2.4152	NaN	NaN	#VALUE!	#VALUE!
gi|472584683	RHTO_01023	DNA-directed RNA polymerase III subunit RPC8	1	2	0	1	2	0	0.88661	0.93331	NaN	1.265	1.6604	0.5207	1.26138	0.932127
gi|472582520	RHTO_03739	DNA-directed RNA polymerases I and III subunit RPAC1	8	9	7	2	3	2	0.73943	2.1848	1.2144	0.95623	0.61091	NaN	1.74518	0.153133
gi|472580786	RHTO_05811	DNA-directed RNA polymerases I and III subunit RPAC2	2	3	1	2	3	1	0.71975	0.99956	0.86156	1.0244	1.0162	1.3399	0.894406	0.129189
gi|472581226	RHTO_05342	DNA-directed RNA polymerases I, II, and III subunit RPABC1	4	4	3	4	4	3	1.1878	1.5777	0.85762	1.5876	0.49525	0.36658	2.40367	0.358187
gi|472581045	RHTO_05547	DNA-directed RNA polymerases I, II, and III subunit RPABC3	1	1	1	1	1	1	1.036	0.92372	0.89314	1.4985	0.7049	0.96801	1.26014	0.20174
gi|472584812	RHTO_00666	DNA-directed RNA polymerases I, II, and III subunit RPABC5	2	3	2	2	3	2	1.3256	1.7416	1.8811	1.3171	0.99608	1.0631	0.977933	0.0331198
gi|472580847	RHTO_05717	DnaJ and TPR domain containing protein	2	4	4	2	4	4	0.60716	0.69729	1.098	0.76486	0.8845	0.98231	1.03714	0.0854949
gi|472586413	RHTO_07000	DnaJ homolog subfamily A member 2	11	11	8	11	11	8	0.67465	0.72878	0.63899	0.7381	0.81035	0.65219	1.35227	0.159203
gi|472586548	RHTO_06071	DnaJ homolog subfamily B member 12	2	2	3	2	2	3	0.64315	1.3449	0.7315	0.85197	0.42898	0.42562	2.33573	0.0121552
gi|472583907	RHTO_01583	DnaJ homolog subfamily B member 4	9	13	14	9	13	14	0.62572	0.58056	0.9588	0.82292	0.51126	0.35142	2.36881	0.448254
gi|472581364	RHTO_05266	DnaJ homolog subfamily C member 1	2	3	3	2	3	3	0.98499	1.4139	1.2589	1.3093	0.40507	0.62002	1.97779	0.441617
gi|472588209	RHTO_00109	DnaJ homolog subfamily C member 19	1	3	1	1	3	1	1.5409	1.8512	2.1974	2.0532	1.0327	1.1074	1.06827	0.23197
gi|472580993	RHTO_05684	DnaJ homolog subfamily C member 7	10	8	9	10	8	9	0.88991	1.9033	1.1655	1.1472	0.77053	0.76449	1.18473	0.204803
gi|472587921	RHTO_03145	DnaJ homolog subfamily C member 9	2	2	0	2	2	0	0.91122	0.67184	NaN	1.1628	0.98766	0.94501	1.0052	0.0569904
gi|472580331	RHTO_06635	dolichol-phosphate mannosyltransferase, glycosyltransferase family 2 protein	2	1	0	2	1	0	1.6715	0.24582	NaN	2.1035	NaN	0.91382	0.864111	0.325547
gi|472583281	RHTO_02269	dolichyl-diphosphooligosaccharide--protein glycosyltransferase, glycosyltransferase family 66 protein	7	5	11	7	5	11	0.56399	0.57864	0.68208	0.73613	NaN	0.69523	#VALUE!	#VALUE!
gi|472582515	RHTO_03735	dolichyl-diphosphooligosaccharide-protein glycotransferase	7	6	7	5	6	6	0.9626	0.83711	0.78511	1.2881	2.7616	1.0417	0.844058	0.435715
gi|472584867	RHTO_00721	dolichyl-diphosphooligosaccharide-protein glycotransferase	0	0	3	0	0	3	NaN	NaN	1.2549	NaN	0.91592	1.1085	0.981707	0.0984497
gi|472583626	RHTO_02130	dolichyl-phosphate-mannose-protein mannosyltransferase, glycosyltransferase family 39 protein	3	5	3	3	5	3	0.45363	0.68725	0.80649	0.63936	1.0349	0.75887	1.10009	0.190148
gi|472583407	RHTO_02306	Dol-P-Man: protein α-mannosyltransferase, glycosyltransferase family 39 protein	4	5	4	4	5	4	0.49088	0.67531	0.60433	0.6728	4.8067	5.46	0.436236	0.416986
gi|472582580	RHTO_03494	Domain of unknown function DUF2638	3	3	3	3	3	3	0.63161	1.3329	1.252	0.91453	0.52987	0.9658	1.43371	0.428602
gi|472588345	RHTO_00245	domain of unknown function DUF292, eukaryotic	2	1	1	2	1	1	0.71257	0.59773	0.91543	0.86288	0.41199	0.85904	1.53267	0.778712
gi|472581475	RHTO_05156	double-strand break repair protein MRE11	1	2	1	1	2	1	1.2539	1.6604	1.6077	1.4003	NaN	1.2608	#VALUE!	#VALUE!
gi|472587387	RHTO_05066	drap deaminase	1	2	1	1	2	1	0.94069	1.1164	1.129	1.0415	NaN	NaN	#VALUE!	#VALUE!
gi|472583567	RHTO_02071	DSS1/SEM1 family protein	0	0	1	0	0	1	NaN	NaN	0.56655	NaN	1.0163	1.236	0.896511	0.123673
gi|472584877	RHTO_00731	dTDP-4-dehydrorhamnose reductase	6	9	7	6	9	7	0.68727	0.72403	1.0066	0.88131	0.60809	0.35665	2.24104	0.580423
gi|472587339	RHTO_05018	D-tyrosyl-tRNA(Tyr) deacylase	1	3	1	0	1	0	NaN	1.4514	NaN	NaN	1.0697	1.2865	0.823106	0.0972876
gi|472584558	RHTO_00898	dual specificity phosphatase ibp1	1	1	2	1	1	2	0.61947	0.81572	0.88332	0.80752	NaN	1.5257	0.831888	0.249539
gi|472586504	RHTO_06027	DUF1168 domain protein	2	3	2	2	3	2	0.59418	0.91705	0.81667	0.78965	1.5176	1.1782	0.729815	0.103633
gi|472586930	RHTO_04607	DUF1212 family protein	0	5	0	0	5	0	NaN	0.35021	NaN	NaN	0.85195	1.4735	0.975451	0.261836
gi|472585757	RHTO_07650	DUF1479 domain protein	3	2	0	3	2	0	0.52604	0.48696	NaN	0.73164	1.5175	1.5772	0.683855	0.065881
gi|472588509	RHTO_00409	DUF1690 domain protein	7	7	5	7	7	5	0.8315	0.6867	1.1157	1.0501	3.6145	2.4089	0.334297	0.0720876
gi|472583486	RHTO_01990	DUF1764 family protein	0	1	0	0	1	0	NaN	0.70549	NaN	NaN	1.7093	1.5924	0.63885	0.0599912
gi|472580388	RHTO_06606	DUF185 family protein	4	4	3	2	2	2	0.97139	1.0889	1.0785	1.2933	1.6777	1.2702	1.1582	0.813694
gi|472586867	RHTO_06390	DUF21 and CBS domain containing protein	1	5	2	1	5	2	0.15569	0.17601	0.17722	0.20649	0.7947	0.75786	1.17629	0.197469
gi|472584223	RHTO_01476	DUF221 domain containing membrane protein	4	3	2	4	3	2	0.39937	0.75665	0.71088	0.48091	1.7769	0.65816	1.15104	0.514827
gi|472582461	RHTO_03681	DUF221 domain containing protein	6	6	4	6	6	4	0.63405	0.7769	1.0764	0.75882	1.4307	1.1325	0.865541	0.158574
gi|472584972	RHTO_00826	DUF221 domain containing protein	10	7	5	10	7	5	0.43757	0.60642	0.90156	0.56486	0.52999	0.69224	1.54673	0.302258
gi|472586913	RHTO_04590	DUF2235 family protein	9	10	7	4	4	3	0.35259	0.35936	0.181	0.45311	0.48938	0.32885	2.55647	0.499366
gi|472586687	RHTO_06210	DUF2237 family protein	1	2	1	1	2	1	0.28646	0.75189	NaN	0.35203	0.97461	1.5856	0.821559	0.198039
gi|472584662	RHTO_01002	DUF2305 family protein	3	3	2	3	3	2	0.54513	0.53098	0.27246	0.69971	1.7701	1.3922	0.641614	0.108433
gi|472585632	RHTO_07525	DUF250 domain containing membrane protein	2	3	0	2	3	0	0.62959	0.30547	NaN	0.86009	1.6012	2.242	0.620776	0.172898
gi|472586963	RHTO_04641	DUF250 domain containing membrane protein	1	2	1	1	2	1	0.33794	0.32782	0.30951	0.49161	1.598	1.3288	0.68917	0.0896445
gi|472586158	RHTO_06745	DUF250 domain membrane protein	2	0	0	2	0	0	0.22981	NaN	NaN	0.34336	1.4458	NaN	0.790867	0.140302
gi|472584133	RHTO_01386	DUF2841 family protein	1	1	1	1	1	1	1.4127	0.85239	1.0671	1.6102	2.1674	1.2316	0.682323	0.192297
gi|472585823	RHTO_07099	DUF336 domain protein	2	2	2	1	0	0	0.7865	NaN	NaN	1.0509	NaN	NaN	#VALUE!	#VALUE!
gi|472582376	RHTO_03866	DUF543 family protein	7	8	7	7	8	7	0.76424	0.8549	1.0259	1.1024	1.0767	0.96479	0.979151	0.0542014
gi|472583580	RHTO_02084	DUF602 family, zinc finger protein	1	1	1	1	1	1	1.7004	1.1676	0.99065	2.272	NaN	1.5149	0.752103	0.130098
gi|472587306	RHTO_04985	DUF625 domain protein	4	1	2	3	1	2	0.83075	1.7882	0.97087	1.1301	1.2001	1.2887	0.784817	0.0446868
gi|472588549	RHTO_00449	DUF726 domain protein	0	1	0	0	1	0	NaN	1.4321	NaN	NaN	NaN	NaN	#VALUE!	#VALUE!
gi|472586742	RHTO_06265	DUF803 domain membrane protein	0	2	0	0	2	0	NaN	0.7571	NaN	NaN	NaN	0.80338	#VALUE!	#VALUE!
gi|472585832	RHTO_07108	DUF866 family protein	2	4	2	2	4	2	0.7585	0.86721	1.0428	1.0331	0.76916	1.579	1.10415	0.409664
gi|472582492	RHTO_03712	DUF89 domain protein	11	10	12	11	10	12	0.35099	0.32397	0.43038	0.48958	0.19978	0.1816	5.25606	0.354333
gi|472582795	RHTO_03385	duf89 domain protein	8	8	10	3	2	4	0.88184	1.1333	1.1916	1.2725	NaN	0.94408	#VALUE!	#VALUE!
gi|472581608	RHTO_04528	DUF962 family protein	2	2	4	2	2	4	0.99532	1.367	0.91352	1.2135	1.0153	0.96202	1.09689	0.14919
gi|472582553	RHTO_03467	DUF985 and Cupin, RmlC-type domain protein	2	2	5	2	2	5	1.0336	0.97777	1.0463	1.326	2.2464	0.34336	1.35556	1.35471
gi|472580733	RHTO_05908	dUTP pyrophosphatase	2	6	6	0	4	4	0.64084	0.99354	1.5226	0.7962	0.27129	0.20275	4.57796	0.777808
gi|472581014	RHTO_05705	dynamin GTPase	10	15	14	10	14	14	0.7754	1.1812	1.0618	1.1655	NaN	1.7288	0.590532	0.017106
gi|472583908	RHTO_01584	dynamin GTPase	7	8	5	7	8	5	1.1927	1.6456	1.3502	1.4077	1.1456	1.6335	1.01888	0.496069
gi|472586348	RHTO_06935	Dynamitin subunit 2	0	1	2	0	1	2	NaN	0.73457	0.57381	NaN	NaN	1.2862	1.14793	0.523887
gi|472583613	RHTO_02117	dynein intermediate chain, cytosolic	2	1	2	2	1	2	0.64249	0.80855	0.89231	0.81211	0.44349	1.1435	1.42098	0.733672
gi|472586897	RHTO_04574	dynein light chain LC8-type	3	1	2	3	1	2	0.88544	1.0396	1.6354	1.0235	1.0293	1.4226	0.840955	0.134452
gi|472581677	RHTO_04401	E3 ubiquitin-protein ligase BRE1	2	6	3	0	2	2	0.82799	0.74294	1.5742	1.0756	0.80002	1.0272	1.11174	0.195479
gi|472585196	RHTO_08115	E3 ubiquitin-protein ligase HUWE1	21	27	24	21	27	24	0.88731	1.1338	1.2619	1.2187	NaN	2.4538	1.64038	1.74351
gi|472587722	RHTO_02946	E3 ubiquitin-protein ligase NEDD4	6	7	7	6	7	7	0.83092	0.97611	1.0523	1.19	1.1876	1.2008	0.8256	0.0209654
gi|472582612	RHTO_03526	E3 ubiquitin-protein ligase RNF115/126	0	0	1	0	0	1	NaN	NaN	0.47718	NaN	0.7698	0.71215	1.32764	0.0670021
gi|472581961	RHTO_04204	E3 ubiquitin-protein ligase TRIP12	6	15	7	6	15	7	0.76472	0.94703	1.0589	0.96717	0.36967	0.55923	2.35933	0.49829
gi|472586998	RHTO_04676	E3 ubiquitin-protein ligase UHRF1	2	1	2	2	1	2	0.54197	1.089	0.58611	0.7551	0.62471	0.66209	1.25319	0.525654
gi|472582943	RHTO_02553	egghead protein (zeste-white 4 protein), glycosyltransferase family 2 protein	12	9	9	12	9	9	0.73017	0.81407	0.84489	0.98374	NaN	0.92553	1.38942	0.436927
gi|472587146	RHTO_04824	EKC/KEOPS complex, subunit Pcc1	1	0	1	1	0	1	0.74345	NaN	0.90224	0.82642	3.2926	1.4285	0.562144	0.223978
gi|472585498	RHTO_07923	electron transfer flavoprotein alpha subunit	14	17	15	1	1	1	0.7365	0.64911	0.94441	1.0598	0.2857	0.29549	3.40027	0.0929243
gi|472585324	RHTO_07748	electron transfer flavoprotein beta subunit	6	10	9	6	10	9	1.0219	0.74731	1.0812	1.3083	0.28797	0.35988	3.20958	0.376172
gi|472586326	RHTO_06913	electron-transferring-flavoprotein dehydrogenase	12	13	15	12	13	15	0.70345	0.80155	0.99056	0.87693	0.69679	0.44565	1.83953	0.57188
gi|472586405	RHTO_06992	elongation factor 1 alpha-like protein	5	10	7	5	10	7	0.76826	0.59924	1.0661	0.92881	1.0055	1.2099	0.854093	0.12888
gi|472582181	RHTO_03921	elongation factor 1-gamma	25	24	25	14	13	14	0.80017	0.92986	1.1777	1.0268	0.7299	NaN	1.05221	0.44949
gi|472582182	RHTO_03922	elongation factor 1-gamma	21	23	22	10	12	11	1.786	2.6251	2.2502	2.2905	1.0211	NaN	2.071	1.54384
gi|472586193	RHTO_06780	elongation factor 3	22	23	23	22	23	23	0.40269	0.46653	0.60002	0.52109	NaN	2.0857	0.804623	0.459856
gi|472587475	RHTO_02697	elongation factor 3	61	65	59	61	65	59	1.2587	1.5134	1.8451	1.6892	1.6809	1.8264	0.914003	0.594187
gi|472587418	RHTO_05097	elongation factor EF-1 alpha subunit	36	36	39	36	36	39	1.0132	1.2358	1.6757	1.2574	1.0495	0.58856	1.40071	0.394943
gi|472585419	RHTO_07843	elongation factor EF-1 beta subunit	6	6	7	6	6	7	1.4827	1.1367	1.8454	1.8284	1.8828	1.2527	0.6647	0.188905
gi|472587047	RHTO_04725	elongation factor G	17	15	20	2	2	1	1.1953	1.5035	1.8081	1.7036	0.71843	0.9436	1.57316	0.624064
gi|472588628	RHTO_00528	elongation factor Ts	3	4	5	1	1	2	1.7298	1.9146	2.1519	2.476	1.0997	0.75371	0.861203	0.491407
gi|472581481	RHTO_05162	elongation factor Tu	21	24	27	21	24	27	1.6369	1.7749	2.439	2.0902	3.7121	NaN	#VALUE!	#VALUE!
gi|472581292	RHTO_05408	elongator complex associated protein Kti2	1	1	2	1	1	2	0.91779	1.0446	1.1806	1.1772	2.2265	0.80968	0.774281	0.410139
gi|472585228	RHTO_08147	elongator complex protein 1	12	16	12	5	8	5	0.89355	0.97887	0.86106	1.08	8.005	10.796	0.165892	0.10024
gi|472587589	RHTO_02812	elongator complex protein 3	1	2	6	1	2	6	0.9046	1.5616	1.1551	1.2003	1.6137	0.60216	1.08705	0.528572
gi|472584688	RHTO_01028	elongator complex protein 4	1	1	0	1	1	0	0.51672	0.90484	NaN	0.60082	0.9232	0.95688	1.0962	0.0587411
gi|472587227	RHTO_04906	Endonuclease	1	4	3	1	4	3	0.94651	1.0544	1.6951	1.1452	1.1464	1.4461	0.781905	0.127831
gi|472583532	RHTO_02036	Endonuclease relaxase, MobA/VirD2 family protein	4	4	1	2	1	0	0.67872	0.66695	1.0168	0.96595	1.4845	1.2795	0.721468	0.0549964
gi|472584429	RHTO_01238	endophilin-A	2	4	4	2	4	4	0.27902	0.60912	0.57354	0.33367	1.3721	1.54	0.668138	0.0537979
gi|472587173	RHTO_04852	endoplasmic reticulum metallopeptidase	4	3	3	4	3	3	0.27708	0.37697	0.41504	0.37287	0.91461	1.1502	0.986661	0.112346
gi|472580523	RHTO_06458	endoplasmic reticulum protein	3	3	3	3	3	3	0.47226	0.39159	0.52907	0.67856	1.0853	1.0775	0.924739	0.00471642
gi|472584646	RHTO_00986	endoplasmic reticulum protein	0	1	0	0	1	0	NaN	NaN	NaN	NaN	NaN	NaN	#VALUE!	#VALUE!
gi|472583856	RHTO_01532	endoplasmic reticulum-Golgi intermediate compartment protein 3	0	1	1	0	1	1	NaN	1.4792	0.56394	NaN	0.79006	0.93504	1.20225	0.115021
gi|472582175	RHTO_03914	endopolyphosphatase	1	1	1	1	1	1	0.4761	0.54437	NaN	0.53953	1.5845	1.5322	0.961026	0.552874
gi|472586623	RHTO_06146	endosomal integral membrane protein, P24a	1	1	1	1	1	1	0.80462	0.7963	1.1483	1.0495	1.0813	1.4677	0.883385	0.184848
gi|472586600	RHTO_06123	endothelin-converting enzyme, metalloendopeptidase	5	5	3	5	5	3	0.32687	0.36306	0.41933	0.40586	0.75195	0.68783	1.3641	0.0784505
gi|472585159	RHTO_08078	enhancer of mRNA-decapping protein 3	1	3	2	1	3	2	0.63986	0.61895	1.0008	0.7526	1.0532	1.1382	1.00501	0.16152
gi|472584415	RHTO_01224	enhancer of polycomb-like protein	2	1	2	2	1	2	0.72762	0.83655	1.105	1.0109	0.72922	0.74154	1.42327	0.110283
gi|472588423	RHTO_00323	enolase	28	25	24	28	25	24	0.77738	0.70363	0.95787	1.0386	1.1897	1.4066	0.709439	0.131863
gi|472580643	RHTO_05958	enoyl reductase	4	3	5	4	3	5	0.62241	0.6652	0.70967	0.7755	0.93737	0.9348	1.04265	0.0444259
gi|472581291	RHTO_05407	enoyl-CoA hydratase	6	6	5	6	6	5	0.33542	0.35146	0.4604	0.42982	0.93139	1.4215	0.819139	0.22073
gi|472582907	RHTO_02517	enoyl-CoA hydratase	2	1	2	2	1	2	0.30074	0.45883	0.31877	0.43386	1.2383	1.401	0.669081	0.165417
gi|472581809	RHTO_04298	enoyl-CoA hydratase/isomerase family protein	3	4	5	3	4	5	0.40548	0.38311	0.66989	0.54001	0.66462	1.4189	1.17557	0.41834
gi|472586757	RHTO_06280	ENTH domain containing protein	3	3	4	3	3	4	0.59463	0.89257	1.1632	0.74993	0.60553	0.50352	1.81025	0.167931
gi|472583799	RHTO_01889	epidermal growth factor receptor substrate 15	14	7	11	14	7	11	0.84261	0.67995	0.80847	1.0545	1.2929	1.4158	0.74769	0.0361902
gi|472586992	RHTO_04670	Epsin domain protein	3	2	7	3	2	7	0.74991	0.89217	1.0199	1.0583	0.67952	0.57929	1.69136	0.204534
gi|472582944	RHTO_02554	ER lumen protein retaining receptor	2	0	1	2	0	1	1.0903	NaN	1.0089	1.5775	0.57958	0.73691	1.35414	0.372698
gi|472584005	RHTO_01681	ER membrane DUF1077 domain protein	0	1	2	0	1	2	NaN	NaN	0.71521	NaN	1.1925	1.1912	0.804759	0.0593635
gi|472585382	RHTO_07806	ER membrane protein involved in regulation of OLE1 transcription, acts with homolog Spt23p	2	1	1	2	1	1	0.62756	2.7963	1.0587	0.82638	1.1299	NaN	1.26078	0.531386
gi|472584246	RHTO_01499	ER to Golgi transport protein yif1	2	3	4	2	2	3	0.87467	0.83652	1.1203	1.0513	2.5736	1.3652	0.734306	0.346656
gi|472580357	RHTO_06661	ER to Golgi transport-related protein	2	2	2	2	2	2	0.77874	0.88845	0.76788	0.98402	NaN	NaN	#VALUE!	#VALUE!
gi|472583413	RHTO_02283	ER to Golgi transport-related protein	2	1	2	1	0	1	0.8225	5.1324	5.6192	1.0899	1.3176	0.99242	0.857855	0.131919
gi|472584975	RHTO_00829	ER to Golgi transport-related protein	6	6	8	2	3	3	0.56853	0.47853	0.9466	0.72545	1.6223	1.8883	0.717068	0.253293
gi|472584505	RHTO_01313	ER-derived vesicles protein ERV14	1	1	1	1	1	1	0.69806	0.37848	0.97304	0.99337	1.4584	1.0356	0.82146	0.140159
gi|472586540	RHTO_06063	ERO1-like protein beta	0	2	2	0	0	1	NaN	NaN	1.4151	NaN	0.85465	0.70441	1.223	0.176227
gi|472581564	RHTO_04484	ESCRT-II complex component	1	0	0	1	0	0	0.36238	NaN	NaN	0.51782	0.66675	0.87122	1.11035	0.409477
gi|472588545	RHTO_00445	esterase / lipase	0	2	2	0	2	2	NaN	0.80155	1.1921	NaN	0.98228	1.4346	0.887356	0.16859
gi|472585729	RHTO_07622	Esterase, SGNH hydrolase-type	6	9	9	6	9	9	0.36023	0.57739	0.3792	0.43961	0.91433	0.9244	1.06593	0.0382387
gi|472582073	RHTO_04067	eukaryotic polypeptide chain release factor 3	9	14	14	9	14	14	0.97682	0.98442	1.3605	1.3207	1.1576	1.3935	0.791415	0.0731288
gi|472586393	RHTO_06980	eukaryotic translation initiation factor	2	0	1	2	0	1	0.8339	NaN	1.2599	0.99173	0.76101	0.74218	1.21336	0.203937
gi|472587245	RHTO_04924	eukaryotic translation initiation factor 2A	16	10	13	16	10	13	1.1941	1.4365	1.5641	1.4668	0.64012	0.66614	1.55337	0.0483805
gi|472581528	RHTO_05209	eukaryotic translation initiation factor 3 subunit 3	11	7	8	11	7	8	1.0736	1.371	1.863	1.3183	0.32152	1.0336	2.13668	1.08468
gi|472587411	RHTO_05090	eukaryotic translation initiation factor 3 subunit CLU1/TIF31	29	37	41	29	37	41	2.4731	3.3356	2.6488	3.2144	1.5742	NaN	0.990062	0.50179
gi|472587710	RHTO_02934	eukaryotic translation initiation factor 3 subunit L	13	12	12	2	1	0	1.1614	1.4074	1.8372	1.4214	1.2255	NaN	1.01822	0.285994
gi|472585949	RHTO_07225	exocyst complex component protein	1	2	1	1	2	1	0.40888	1.4684	1.2692	0.47818	0.58434	NaN	1.92208	0.298046
gi|472581745	RHTO_04470	exocyst complex component, exo70 subunit	2	3	2	2	3	2	0.95108	0.70069	0.81409	1.0515	1.3075	0.77675	0.905577	0.334465
gi|472584624	RHTO_00964	exocyst complex component, sec8 subunit	2	1	2	2	1	2	0.48066	1.4148	0.75431	0.72942	0.87943	1.2592	0.965628	0.242499
gi|472587984	RHTO_03209	Exocyst complex, component Exoc1	3	2	1	3	2	1	0.86706	1.3018	1.2864	0.98555	1.2058	1.2697	0.825882	0.0366942
gi|472587784	RHTO_03008	exodeoxyribonuclease III	1	3	2	1	3	2	0.62899	0.41675	0.76923	0.76407	1.234	NaN	0.914595	0.147393
gi|472585375	RHTO_07799	exopolyphosphatase	3	4	1	3	4	1	0.29212	0.43149	0.33269	0.38683	0.70069	0.78546	1.41169	0.131504
gi|472586436	RHTO_07023	exopolyphosphatase	5	6	4	1	3	1	0.99926	0.92683	1.7332	1.2377	0.63885	0.81091	1.47677	0.213552
gi|472584705	RHTO_01045	exosome complex component CSL4	0	1	1	0	1	1	NaN	1.2728	1.2477	NaN	2.0276	1.4074	0.646556	0.133422
gi|472586551	RHTO_06074	exosome complex component MTR3	1	3	2	1	3	2	0.99341	1.4216	2.5088	1.263	0.90072	1.0898	1.10041	0.178103
gi|472583502	RHTO_02006	exosome complex component RRP4	0	2	3	0	2	3	NaN	1.2915	1.5922	NaN	0.84185	1.079	1.1809	0.250711
gi|472586507	RHTO_06030	exosome complex component RRP40	1	1	0	1	1	0	0.93583	1.2819	NaN	1.1235	0.40754	0.3489	2.4728	0.384178
gi|472582403	RHTO_03622	exosome complex component RRP41	2	3	4	0	1	1	1.1064	1.9812	1.2181	1.2926	1.7278	0.79158	0.921033	0.484033
gi|472584342	RHTO_01151	exosome complex component RRP43	2	0	0	2	0	0	0.89908	NaN	NaN	1.1207	0.49581	2.0285	1.45303	0.835649
gi|472584008	RHTO_01684	exosome complex exonuclease DIS3/RRP44	3	3	5	3	3	5	0.7531	0.94068	1.0823	1.0286	0.97352	0.91952	1.07659	0.0449341
gi|472584234	RHTO_01487	Exosome complex exonuclease RRP42	2	1	1	2	1	1	0.89077	NaN	1.4281	1.1847	0.99776	0.93861	1.03383	0.044661
gi|472583294	RHTO_02258	exosome complex exonuclease RRP6	1	2	2	1	2	1	1.1385	1.1164	1.2341	1.3419	0.97562	4.0855	0.552047	0.415655
gi|472584630	RHTO_00970	exosome complex protein LRP1	0	0	1	0	0	1	NaN	NaN	NaN	NaN	0.87988	0.89569	1.20623	0.138489
gi|472587477	RHTO_02699	exostosin-like glycosyltransferase, glycosyltransferase family 47 protein	0	0	2	0	0	2	NaN	NaN	0.76645	NaN	0.69165	0.6381	1.6595	0.271882
gi|472587845	RHTO_03069	Exostosin-like protein, glycosyltransferase family 47 protein	4	2	2	4	2	2	0.6222	0.72053	1.6118	0.72515	0.68275	0.79891	1.69194	0.587798
gi|472587137	RHTO_04815	expansin family protein	0	1	1	0	1	1	NaN	0.18367	0.22363	NaN	0.52525	0.60682	2.01866	0.439523
gi|472587696	RHTO_02920	expansin family protein	0	0	1	0	0	1	NaN	NaN	0.96673	NaN	1.2394	1.6089	0.871809	0.288293
gi|472583837	RHTO_01927	exportin-1	12	11	10	12	11	10	0.67137	0.89498	1.0793	0.78973	NaN	NaN	#VALUE!	#VALUE!
gi|472581181	RHTO_05498	Exportin-T	1	1	1	1	1	1	1.0191	1.688	0.36103	1.4102	0.55935	0.63443	1.58851	0.193427
gi|472585723	RHTO_07616	EXTL3, alpha-1,4-N-acetylglucosaminyltransferase, glycosyltransferase family 64 protein	3	7	5	3	7	5	0.14156	0.22835	0.24027	0.19548	NaN	1.7342	0.631418	0.0774747
gi|472587018	RHTO_04696	Extracellular metalloproteinase 4	2	0	1	2	0	1	1.3067	NaN	1.6553	1.6594	1.177	0.74	1.03732	0.273684
gi|472584071	RHTO_01324	FACT complex component Spt16	6	4	4	2	0	1	0.51928	NaN	1.4354	0.6586	0.93992	0.87208	1.19233	0.156311
gi|472587196	RHTO_04875	FAD binding domain protein	6	8	9	5	7	7	0.76543	0.41567	1.169	0.88215	0.73497	0.96863	1.02897	0.333356
gi|472583696	RHTO_01786	FAD dependent oxidoreductase	1	5	5	1	5	5	0.94297	0.92782	1.4204	1.1787	0.67557	0.7887	1.44367	0.160625
gi|472585836	RHTO_07112	FAD dependent oxidoreductase	0	1	1	0	1	1	NaN	0.67701	1.1331	NaN	0.78533	0.91945	1.34852	0.305517
gi|472586718	RHTO_06241	FAD linked oxidase	1	0	1	1	0	1	0.28436	NaN	2.5509	0.34804	0.65327	0.80714	1.39585	0.147147
gi|472583984	RHTO_01660	farnesyl diphosphate synthase	8	11	9	8	11	9	0.90677	0.86865	1.2711	1.2469	0.10977	0.12853	7.63341	1.5552
gi|472582980	RHTO_02590	farnesyl-diphosphate farnesyltransferase	11	8	12	11	8	12	0.55595	0.61587	0.78536	0.78144	2.2359	1.2833	0.662953	0.186997
gi|472584840	RHTO_00694	Fasciclin domain family protein	3	4	4	2	2	2	0.2912	0.32806	0.59614	0.38689	1.0389	0.96863	0.965525	0.0654275
gi|472588214	RHTO_00114	fatty acid desaturase 2 (delta-6 desaturase)	1	4	2	1	4	2	1.1474	0.4798	0.89541	1.5421	0.44733	0.30209	2.48139	0.737358
gi|472580563	RHTO_06395	fatty acid elongase	1	0	1	1	0	1	0.48696	NaN	0.9041	0.5888	0.40417	0.3221	2.64931	0.397799
gi|472583047	RHTO_02657	fatty acid elongase 2	3	2	4	3	2	4	1.2186	2.984	1.5723	1.4648	0.48446	0.59163	1.99321	0.274461
gi|472585262	RHTO_07686	fatty acid oxygenase PpoA	33	39	37	33	39	37	0.21792	0.24331	0.32628	0.30153	2.0712	2.0569	0.467481	0.0295081
gi|472583635	RHTO_02139	fatty acid synthase subunit alpha, fungi type	91	100	91	91	100	91	0.22241	0.24259	0.38607	0.29608	1.4673	1.2795	0.728107	0.0503679
gi|472583528	RHTO_02032	fatty acid synthase subunit beta, fungi type	29	37	38	0	3	2	NaN	0.52929	0.45493	NaN	1.2832	1.372	0.750424	0.0260032
gi|472582134	RHTO_04128	fatty acid-2 hydroxylase	1	3	2	1	3	2	1.0465	0.93125	1.4004	1.3491	1.1798	1.1067	0.875054	0.0280086
gi|472585946	RHTO_07222	F-box and leucine-rich repeat protein GRR1	1	1	0	1	1	0	1.2071	0.65582	NaN	1.3617	1.3063	1.2074	0.785818	0.0367371
gi|472582866	RHTO_03456	F-box and WD repeat domain containing protein	3	2	1	3	2	1	0.24866	0.9812	NaN	0.31619	NaN	1.7225	#VALUE!	#VALUE!
gi|472581234	RHTO_05350	F-box domain, cyclin-like domain containg protein	1	0	1	1	0	1	0.6902	NaN	2.618	0.88512	NaN	NaN	#VALUE!	#VALUE!
gi|472588487	RHTO_00387	F-box domain, cyclin-like domain containg protein	1	1	1	1	1	1	0.50779	1.4529	1.9056	0.62517	2.2926	NaN	0.690772	0.360039
gi|472581696	RHTO_04420	F-box domain-containing protein	1	2	1	1	2	1	0.57012	0.93672	0.64943	0.64507	1.6676	1.7981	0.544583	0.0616784
gi|472586279	RHTO_06866	f-box protein pof6	0	1	1	0	1	1	NaN	1.489	1.1893	NaN	2.0443	2.1893	0.423913	0.0864927
gi|472585573	RHTO_07466	FEN-1 endonuclease	3	6	2	3	6	2	0.35669	0.63811	0.94082	0.44096	0.50448	0.61294	1.69452	0.261946
gi|472581303	RHTO_05419	ferric reductase transmembrane component	1	1	1	1	1	1	2.2603	1.0267	0.8473	2.8777	0.86859	1.0202	1.19793	0.244404
gi|472586351	RHTO_06938	ferric reductase transmembrane component 2 precursor	1	3	0	1	3	0	NaN	3.3255	NaN	NaN	1.2277	1.1171	0.8242	0.066669
gi|472580455	RHTO_06556	ferric-chelate reductase	4	6	8	3	5	7	1.2612	1.65	0.86995	1.5658	1.3853	1.4904	0.699897	0.0261576
gi|472580680	RHTO_05995	ferrochelatase	6	6	7	1	1	1	2.8664	6.3882	10.262	3.5698	0.69924	1.197	1.12005	0.298167
gi|472584414	RHTO_01223	FHA domain containing protein	1	1	1	1	1	1	0.88774	1.4352	0.75786	1.0196	NaN	NaN	#VALUE!	#VALUE!
gi|472581335	RHTO_05237	flavin containing amine oxidase	2	4	3	0	2	1	NaN	0.97731	1.5199	NaN	NaN	3.0934	#VALUE!	#VALUE!
gi|472587064	RHTO_04742	Flavin reductase-like, FMN-binding domain containing protein	6	8	10	6	8	10	1.1465	1.3737	1.2445	1.41	0.71527	1.2225	0.918036	0.438658
gi|472586138	RHTO_06725	flavin-binding monooxygenase	3	5	8	3	5	8	1.3428	1.266	1.6391	1.5968	0.38886	0.46497	2.60651	0.474236
gi|472583981	RHTO_01657	flavin-containing monooxygenase	5	8	7	5	8	7	0.78515	0.91377	1.3666	1.0028	0.30209	0.48185	2.45726	0.740073
gi|472580778	RHTO_05803	FMN binding oxidoreductase	0	1	1	0	1	1	NaN	1.1134	1.211	NaN	0.67468	0.68908	1.40591	0.106426
gi|472582688	RHTO_03602	FMN binding protein	1	0	0	1	0	0	1.0339	NaN	NaN	1.2746	0.29244	0.32447	3.11883	0.284042
gi|472587172	RHTO_04850	forkhead box protein I	1	1	1	1	1	1	0.62233	0.63007	0.9186	0.78645	0.73168	0.49508	1.5512	0.40894
gi|472586320	RHTO_06907	forkhead-associated domain histidine triad-like protein	1	3	1	1	3	1	0.50159	1.2389	1.2133	0.62527	NaN	NaN	#VALUE!	#VALUE!
gi|472583346	RHTO_02278	formin binding protein	3	4	6	3	4	6	0.82937	1.1274	1.4784	0.95785	1.6202	0.82956	0.906939	0.294224
gi|472582745	RHTO_03335	Fps/Fes/Fer/CIP4 homology and SAFF domain protein	7	7	8	1	3	2	0.51993	0.65335	0.74508	0.76419	1.0355	0.91835	1.05478	0.0778306
gi|472584170	RHTO_01423	frataxin	2	2	2	2	2	2	0.59031	0.8307	1.1476	0.84248	0.65178	0.53582	1.67515	0.171632
gi|472587822	RHTO_03046	fructose-1,6-bisphosphatase I	7	10	9	2	4	4	0.51375	0.71489	0.99553	0.64519	1.8265	0.76698	1.09785	0.481617
gi|472587819	RHTO_03043	fructose-bisphosphate aldolase, class II	16	22	21	16	22	21	1.3667	1.1393	1.3411	1.7336	0.87854	1.082	1.00936	0.113525
gi|472581274	RHTO_05390	F-type H+-transporting ATPase subunit b	12	13	14	4	4	4	0.66162	0.788	1.0335	1.0087	0.56202	1.0869	1.05152	0.671754
gi|472585380	RHTO_07804	F-type H+-transporting ATPase subunit f	3	4	3	3	4	3	0.93304	0.82863	1.3681	1.47	0.71808	0.72356	1.34545	0.072722
gi|472588386	RHTO_00286	F-type H+-transporting ATPase subunit g	6	7	5	6	7	5	1.5285	1.1911	1.8603	2.058	1.4663	1.299	0.808697	0.149973
gi|472582434	RHTO_03654	F-type H+-transporting ATPase subunit h	4	3	3	4	3	3	0.62016	0.61363	1.6052	0.75912	0.90512	0.88462	1.14514	0.0493497
gi|472585728	RHTO_07621	fucosyltransferase, glycosyltransferase family 10 protein	3	4	5	3	4	5	0.41594	0.61106	0.55626	0.55764	0.48774	0.63135	1.90359	0.277164
gi|472580876	RHTO_05746	fumarate hydratase, class II	13	11	19	2	3	4	0.99929	1.1124	1.5451	1.3101	0.50171	0.46524	2.25758	0.331958
gi|472583884	RHTO_01560	fumarate reductase flavoprotein subunit	17	16	17	17	16	17	0.39703	0.57669	0.63687	0.53299	0.57223	0.6566	1.62915	0.112776
gi|472586966	RHTO_04644	fumarylacetoacetate hydrolase family protein	1	2	1	1	2	1	0.7642	0.50495	0.78457	1.0204	0.77228	0.53641	1.68058	0.334166
gi|472587823	RHTO_03047	fumarylacetoacetate hydrolase family protein	4	4	4	4	4	4	0.88682	0.91964	1.2354	1.3583	1.7439	2.0142	0.534951	0.0544135
gi|472584017	RHTO_01693	fungal specific actin related protein	1	1	0	1	1	0	0.43464	0.88516	NaN	0.61105	0.21117	0.34262	3.44683	1.12207
gi|472580896	RHTO_05766	FY-rich domain containing protein	3	2	2	3	2	2	0.74839	2.2441	1.6659	0.92433	0.07089	0.19599	8.07608	5.22254
gi|472583507	RHTO_02011	G1/S-specific cyclin Cln1	0	0	1	0	0	1	NaN	NaN	NaN	NaN	0.40315	0.57106	2.33109	0.521567
gi|472583760	RHTO_01850	G2/M transition checkpoint protein Sum2	3	8	8	3	8	8	0.94153	1.0736	1.1328	1.2392	1.6365	1.6018	0.657843	0.0698802
gi|472584134	RHTO_01387	G2/mitotic-specific cyclin 1/2	2	2	1	2	2	1	0.69274	1.2264	1.745	0.99481	2.2422	1.9451	0.473623	0.0358347
gi|472580659	RHTO_05974	GABA permease	2	2	1	2	2	1	0.97898	1.1626	1.0564	1.2299	1.1678	1.6481	0.722234	0.125812
gi|472580281	RHTO_06709	Gag-Pol polyprotein	1	2	1	1	2	1	1.1636	0.56531	0.79739	1.4632	0.99645	0.93751	1.11963	0.149758
gi|472583525	RHTO_02029	galactose-proton symport	4	4	4	4	4	4	0.7335	0.87917	1.0708	0.97817	1.0784	1.1278	0.943466	0.0663602
gi|472585407	RHTO_07831	GAMM1 protein	7	9	8	7	9	8	0.95738	1.0488	1.4201	1.2614	0.74744	NaN	1.5417	0.28822
gi|472583097	RHTO_02366	gamma-butyrobetaine dioxygenase, autophagy-related protein 8	2	4	4	2	4	4	0.80606	0.59411	0.74618	1.0218	0.44611	0.55716	2.17779	0.355386
gi|472585279	RHTO_07703	gamma-glutamyltranspeptidase	2	1	2	2	1	2	0.47745	0.55844	0.66166	0.62628	0.33417	0.35735	2.65882	0.421157
gi|472586175	RHTO_06762	gamma-glutamyltranspeptidase	1	1	1	1	1	1	0.29386	0.24701	0.88899	0.42876	2.7127	0.92803	0.723094	0.501279
gi|472587637	RHTO_02860	GARP complex component Vps54	1	2	0	1	2	0	0.5505	1.5113	NaN	0.74356	0.45425	0.55331	2.12498	0.28718
gi|472581748	RHTO_04472	GARP complex subunit Vps53	1	2	0	1	2	0	0.58595	1.0424	NaN	0.81937	0.87642	0.88751	1.22783	0.162895
gi|472580888	RHTO_05758	GATA transcription factor	2	2	1	2	2	1	0.37283	0.45595	NaN	0.46886	0.5913	0.87788	1.56907	0.383762
gi|472583782	RHTO_01872	GATA transcription factor	5	5	5	5	5	5	1.2636	1.1181	0.90022	1.5049	0.42557	1.0462	1.17256	1.08523
gi|472583999	RHTO_01675	GATA-binding transcription factor	0	1	3	0	1	3	NaN	0.82832	1.2011	NaN	0.86319	0.80097	1.20349	0.0636345
gi|472581042	RHTO_05544	GCN5-related N-acetyltransferase (GNAT)	2	2	2	2	2	2	0.90547	1.1731	1.4411	1.1618	0.42561	0.96483	1.69301	0.928514
gi|472585316	RHTO_07740	GC-rich sequence DNA-binding factor	3	1	0	3	1	0	0.7344	1.125	NaN	0.98153	1.0785	0.6326	1.254	0.46214
gi|472586439	RHTO_07026	GDP/GTP exchange factor Sec2p	4	1	4	4	1	4	0.48528	0.61303	0.74479	0.65156	0.93648	0.54459	1.72405	0.607944
gi|472582079	RHTO_04073	GDP-L-fucose synthase	7	6	5	7	6	5	0.43673	0.59863	0.92093	0.61282	0.90743	1.4825	0.997274	0.285179
gi|472581725	RHTO_04449	GDP-Man: α-1,3-mannosyltransferase, glycosyltransferase family 69 protein	7	8	7	1	2	3	0.97038	1.7836	1.6145	1.3588	1.2223	1.3486	1.00564	0.393003
gi|472585727	RHTO_07620	GDP-mannose 4,6-dehydratase	29	28	26	17	15	14	0.58492	0.78921	1.2178	0.7853	0.65081	0.59302	1.61142	0.10588
gi|472588640	RHTO_00540	GDP-mannose 4,6-dehydratase	22	23	22	10	10	10	0.56125	0.70547	1.0819	0.70025	0.46409	0.33821	2.33026	0.559763
gi|472587269	RHTO_04948	GDP-mannose transporter	1	2	2	1	2	2	0.35661	0.33462	0.37738	0.47653	0.9776	0.81405	1.06244	0.150177
gi|472581169	RHTO_05486	GDSL family lipase, carbohydrate esterase family 16 protein	0	1	2	0	1	2	NaN	1.6164	0.80699	NaN	0.6888	0.6739	1.51837	0.0889612
gi|472587638	RHTO_02861	GDSL Lipase/Acylhydrolase family protein	4	4	3	4	4	3	0.43058	0.41022	2.1051	0.54077	0.46713	0.7453	1.74124	0.564971
gi|472582894	RHTO_02504	geranylgeranyl diphosphate synthase, type III	2	2	2	0	0	1	0.6746	0.9875	0.92877	0.89682	0.7385	0.5014	1.92062	0.533474
gi|472585163	RHTO_08082	geranylgeranyl transferase type-2 subunit alpha	0	2	1	0	2	1	NaN	0.88058	0.89622	NaN	1.7064	1.1008	0.785237	0.174125
gi|472588285	RHTO_00185	Globin domain containg protein	9	10	13	9	10	13	2.007	0.7939	5.5851	2.5881	1.538	1.4218	0.693918	0.0398585
gi|472586825	RHTO_06348	glucan synthesis regulatory protein	1	2	3	1	2	3	0.60213	0.82596	0.97879	0.73221	0.57869	0.60765	1.39976	0.498976
gi|472581228	RHTO_05344	glucoamylase, glycoside hydrolase family 15 protein	4	6	5	4	6	5	0.36504	0.60217	0.64097	0.50877	1.2578	1.4098	0.762768	0.0466182
gi|472582854	RHTO_03444	gluconate 5-dehydrogenase	6	7	7	6	7	7	0.30189	0.53641	0.88006	0.42383	0.79305	0.79599	1.19853	0.104107
gi|472585657	RHTO_07550	gluconate 5-dehydrogenase	2	3	2	2	3	2	0.29605	0.45473	0.58171	0.39933	0.56541	0.68744	1.86423	0.464791
gi|472585306	RHTO_07730	glucooligosaccharide oxidase	0	0	1	0	0	1	NaN	NaN	NaN	NaN	0.058546	0.25412	8.92958	7.11854
gi|472587197	RHTO_04876	glucosamine-phosphate N-acetyltransferase	1	1	2	1	1	2	0.49328	0.45039	0.62592	0.71351	1.3456	NaN	0.903315	0.22649
gi|472586996	RHTO_04674	glucose inhibited division protein A	1	1	4	1	1	4	1.0075	NaN	1.7497	1.4573	1.4437	1.466	0.684192	0.00765277
gi|472585072	RHTO_07991	glucose repression mediator protein	5	3	5	5	3	5	0.84998	1.0243	0.77847	1.0977	1.8014	1.9031	0.516359	0.0440261
gi|472584775	RHTO_00629	glucose repression regulatory protein TUP1	10	9	9	10	9	9	0.54	0.72071	0.89628	0.73186	NaN	2.0995	#VALUE!	#VALUE!
gi|472586266	RHTO_06853	Glucose/ribitol dehydrogenase	3	1	4	3	1	4	1.1514	0.65171	0.9143	1.4411	0.74227	0.66763	1.35936	0.13282
gi|472585428	RHTO_07853	glucose-6-phosphate 1-dehydrogenase	30	32	32	30	32	32	0.46631	0.60572	0.88367	0.63177	0.82549	0.82914	1.87116	1.14736
gi|472583011	RHTO_02621	glucose-6-phosphate 1-epimerase	3	7	5	3	7	5	0.45361	0.64077	0.85065	0.59361	0.76945	0.72817	1.37926	0.0827752
gi|472582064	RHTO_04058	glucose-6-phosphate isomerase	27	29	28	4	4	4	0.49206	0.56022	0.83156	0.7053	1.2994	NaN	0.818896	0.0697351
gi|472581144	RHTO_05461	glucose-repressible protein Grg1	2	2	2	2	2	2	0.13729	0.086031	0.13748	0.16639	1.2196	1.0069	0.915831	0.0880843
gi|472586334	RHTO_06921	glutamate carboxypeptidase	15	15	14	15	15	14	0.79435	0.83669	0.96863	1.1091	1.0664	0.92794	1.11819	0.203775
gi|472581865	RHTO_04355	glutamate carboxypeptidase II	4	5	4	3	4	3	0.4406	0.38426	0.4233	0.52676	1.3129	1.2116	0.854308	0.110007
gi|472584187	RHTO_01440	glutamate decarboxylase	2	2	2	2	2	2	0.34452	0.36786	0.35925	0.4221	1.0056	0.839	1.20137	0.211842
gi|472585294	RHTO_07718	glutamate dehydrogenase (NAD+)	15	18	21	14	16	19	0.33879	0.36821	0.57811	0.44939	0.90187	0.76618	1.16336	0.123903
gi|472586972	RHTO_04650	glutamate dehydrogenase (NADP+)	19	24	24	19	24	24	1.6582	1.6856	2.1594	2.307	0.59671	0.59396	1.47902	0.347673
gi|472581453	RHTO_05134	glutamate N-acetyltransferase / amino-acid N-acetyltransferase	9	12	13	1	2	2	0.99958	1.1112	1.17	1.3865	NaN	17.031	0.322115	0.372502
gi|472580678	RHTO_05993	glutamate-5-semialdehyde dehydrogenase	4	9	7	4	9	7	0.94505	1.1073	1.4765	1.3457	1.0994	1.0936	0.911999	0.00341113
gi|472586572	RHTO_06095	glutamate-cysteine ligase catalytic subunit	8	7	6	7	6	5	0.89736	1.1	1.3054	1.1442	0.92402	0.88045	1.10901	0.0378692
gi|472582607	RHTO_03521	glutamate-rich WD repeat containing protein	4	7	7	4	7	7	1.0045	1.151	1.2656	1.3094	1.0419	1.0719	0.939688	0.017712
gi|472586147	RHTO_06734	glutaminase GtaA	0	1	1	0	1	1	NaN	NaN	1.7956	NaN	2.1478	2.1902	0.449132	0.0211896
gi|472581831	RHTO_04320	glutamine amidotransferase	3	0	0	3	0	0	2.8122	NaN	NaN	3.5558	0.89855	1.2703	1.35451	0.719215
gi|472583550	RHTO_02054	glutamine amidotransferase	1	1	0	1	1	0	0.73581	1.7229	NaN	1.0578	0.82985	1.4867	0.996961	0.284605
gi|472588380	RHTO_00280	glutamine amidotransferase / cyclase	12	15	15	3	3	4	1.7503	1.4579	2.1317	2.0923	NaN	1.0339	#VALUE!	#VALUE!
gi|472584819	RHTO_00673	glutamine synthetase	5	9	7	5	9	7	2.2576	2.1751	2.3988	3.0693	2.2351	1.6405	0.493659	0.101062
gi|472588501	RHTO_00401	glutamine synthetase	2	5	4	2	5	4	0.53872	0.45725	0.68082	0.68034	0.55859	0.73314	1.44463	0.313158
gi|472583353	RHTO_02328	glutamine-fructose-6-phosphate transaminase	19	25	22	19	25	22	0.56765	0.83096	1.074	0.68386	1.3	1.1785	0.801351	0.0417437
gi|472581741	RHTO_04465	glutamine-tRNA ligase	24	24	25	5	5	5	0.98752	1.1306	1.2536	1.3108	1.5585	1.8469	0.596335	0.0507796
gi|472582402	RHTO_03621	glutamyl-tRNA synthetase	22	24	24	22	24	24	1.0876	1.2084	1.5515	1.4147	0.29408	0.53724	2.55568	0.780486
gi|472583685	RHTO_01775	glutamyl-trna synthetase	2	1	4	2	1	4	0.73232	0.56883	1.1237	0.91358	1.0099	1.1304	1.01932	0.151349
gi|472585085	RHTO_08004	glutamyl-tRNA synthetase	1	0	0	1	0	0	0.8804	NaN	NaN	1.0881	0.15329	1.3869	2.75371	3.26815
gi|472583114	RHTO_02384	glutaredoxin	2	1	1	2	1	1	0.51491	0.42885	1.0149	0.76521	0.40003	0.85623	1.95596	0.698726
gi|472582941	RHTO_02551	glutaredoxin 3	1	4	5	0	0	1	NaN	NaN	2.8407	NaN	NaN	1.9544	#VALUE!	#VALUE!
gi|472586556	RHTO_06079	glutaryl-CoA dehydrogenase	2	3	4	2	3	4	1.4292	0.67254	1.2187	1.8586	1.2593	1.8184	0.760792	0.196338
gi|472588325	RHTO_00225	glutathione peroxidase	2	2	2	2	2	2	0.24157	0.33942	0.55925	0.32287	4.9735	NaN	3.5677	4.76114
gi|472581111	RHTO_05613	glutathione S-transferase	2	1	2	2	1	2	0.38486	0.26936	0.5254	0.50348	1.0717	1.1379	0.913471	0.0301036
gi|472583343	RHTO_02209	Glutathione S-transferase	9	11	11	9	11	11	0.64883	0.62559	0.80805	0.77862	0.72601	0.92078	1.26195	0.154808
gi|472584856	RHTO_00710	Glutathione S-transferase	12	17	13	3	3	3	0.24668	0.28132	0.36552	0.35026	1.52	1.3661	0.723739	0.0621226
gi|472587684	RHTO_02908	Glutathione S-transferase	1	1	1	1	1	1	0.62072	0.6454	0.52597	0.78927	0.68382	0.62408	1.58846	0.119745
gi|472587833	RHTO_03057	glutathione S-transferase	4	4	5	1	0	0	0.24979	NaN	NaN	0.37224	0.4991	0.58554	1.8519	0.148038
gi|472588550	RHTO_00450	glutathione S-transferase	2	4	5	2	4	5	0.79942	1.253	0.90867	1.1134	0.90829	0.80443	1.23398	0.128682
gi|472588581	RHTO_00481	Glutathione S-transferase domain containing protein	9	5	5	4	1	1	0.72447	0.98375	1.085	0.90113	0.77128	0.58385	1.40926	0.265727
gi|472587261	RHTO_04940	glutathione S-transferase kappa 1	1	1	1	1	1	1	0.42083	0.5263	0.56781	0.61543	0.69408	NaN	1.62667	0.262919
gi|472582183	RHTO_03923	Glutathione S-transferase, N-terminal	3	2	2	3	2	2	0.45563	1.5253	0.88562	0.69337	NaN	0.9993	1.03943	0.054769
gi|472585370	RHTO_07794	glutathione synthetase	6	6	8	6	6	8	0.82278	0.77395	1.1038	1.0356	0.69831	0.6734	1.36609	0.162263
gi|472581076	RHTO_05578	glutathione transferase omega-1	1	1	5	1	1	5	1.5651	0.53594	1.0802	2.1967	0.51999	0.5989	1.3802	0.73196
gi|472587880	RHTO_03104	glutathione-disulfide reductase	12	16	13	12	16	13	0.62424	0.6463	0.94668	0.79258	1.4581	1.4149	0.739769	0.0760257
gi|472582526	RHTO_03746	glyceraldehyde 3-phosphate dehydrogenase	21	24	17	2	1	0	0.82946	1.2407	1.272	1.0264	1.4988	1.1238	0.739983	0.129796
gi|472585772	RHTO_07665	glycerol-3-phosphate dehydrogenase	18	19	17	4	6	5	0.3727	0.47553	0.7004	0.48156	1.7705	0.85026	0.723554	0.397703
gi|472583362	RHTO_02273	glycerol-3-phosphate dehydrogenase (NAD+)	13	13	15	13	13	15	0.30304	0.37782	0.5061	0.38021	1.91	1.5708	0.6146	0.0822705
gi|472585094	RHTO_08013	glycerol-3-phosphate dehydrogenase (NAD+) (partial sequence c terminus)	17	19	19	17	19	19	0.45573	0.46964	0.68285	0.61847	3.6444	1.927	0.435149	0.13926
gi|472587834	RHTO_03058	glycerol-3-phosphate O-acyltransferase / dihydroxyacetone phosphate acyltransferase	6	4	5	6	4	5	0.38444	0.58902	0.61131	0.53117	0.70275	0.78547	1.47829	0.237698
gi|472586868	RHTO_06391	glyceronephosphate O-acyltransferase	4	3	2	4	3	2	0.28183	0.20343	0.36848	0.37226	0.45239	0.61705	2.29144	0.714746
gi|472584436	RHTO_01245	glycerophosphoryl diester phosphodiesterase	6	4	4	6	4	4	0.15968	0.063644	0.20347	0.19922	0.78206	0.95338	1.16379	0.162475
gi|472587585	RHTO_02808	glycine cleavage system H protein	3	2	2	3	2	2	0.23702	0.31479	0.46439	0.3621	0.65973	0.67337	1.54603	0.0804773
gi|472586338	RHTO_06925	glycine dehydrogenase	21	21	25	21	21	25	1.0828	1.3984	1.8828	1.3547	0.6849	0.92697	1.24052	0.197105
gi|472582137	RHTO_04131	glycine hydroxymethyltransferase	25	29	32	25	29	32	1.7395	1.8967	2.136	2.1703	4.6304	0.48542	0.991828	0.956189
gi|472582247	RHTO_03987	glycine-rich RNA binding protein	4	4	4	4	4	4	1.0974	1.0181	1.7206	1.4212	1.2295	NaN	0.830578	0.0243797
gi|472587360	RHTO_05039	glycogen debranching enzyme, glycoside hydrolase family 13 protein	12	11	9	12	11	9	0.48776	0.36746	0.54886	0.60128	1.6077	1.6424	0.600235	0.0271363
gi|472582071	RHTO_04065	glycogen(starch) synthase, glycosyltransferase family 3 protein	16	21	19	16	21	19	0.67691	0.97896	1.1797	0.98385	1.1923	1.3268	0.807842	0.0470477
gi|472585534	RHTO_07427	Glycoside hydrolase	1	2	0	1	2	0	0.39176	0.65612	NaN	0.5729	NaN	0.68326	1.84978	0.546179
gi|472587315	RHTO_04994	Glycoside Hydrolase Family 13 protein, CBM48 containing, glycogen-binding	16	17	16	16	17	16	0.31698	0.40934	0.60144	0.40049	1.3452	0.56131	1.3601	0.545935
gi|472583388	RHTO_02301	glycoside hydrolase family 15 protein	7	8	5	7	8	5	0.34089	0.31261	0.40301	0.45754	0.67232	0.63974	1.58664	0.112859
gi|472583572	RHTO_02076	glycoside hydrolase family 17 protein	0	1	1	0	1	1	NaN	2.0678	0.83833	NaN	1.716	1.7642	0.57872	0.0104738
gi|472580821	RHTO_05846	glycoside hydrolase family 18 protein	1	2	4	1	2	4	0.3122	0.41489	0.55514	0.42262	0.41169	0.73127	2.0312	0.578567
gi|472583803	RHTO_01893	glycoside hydrolase family 5 protein	1	1	2	1	1	2	0.452	0.54174	0.93897	0.53279	0.64855	0.76405	1.42536	0.164817
gi|472583841	RHTO_01931	glycoside hydrolase family 61 protein	2	1	2	2	1	2	3.9824	0.33387	1.0898	4.716	0.70645	1.2666	1.03378	0.334887
gi|472587747	RHTO_02971	Glycoside hydrolase, family 5	0	1	3	0	1	3	NaN	0.67688	0.79954	NaN	0.99534	1.0181	1.02838	0.0615383
gi|472587772	RHTO_02996	Glycoside hydrolase, family 5	0	1	1	0	1	1	NaN	0.42575	0.90645	NaN	1.0943	0.97943	1.02105	0.107243
gi|472586018	RHTO_07294	glycosyl-hydrolase	0	1	1	0	1	1	NaN	1.1015	0.71115	NaN	1.2553	0.75424	1.01414	0.276892
gi|472580727	RHTO_05902	glycosyltransferase family 2 protein	2	1	3	2	1	3	0.33502	0.80662	0.50462	0.4409	0.44736	NaN	2.07503	0.226711
gi|472586581	RHTO_06104	glycosyltransferase family 31 protein	7	4	4	3	1	1	0.59953	0.70603	1.5871	0.82286	0.48782	0.58172	1.8457	0.178568
gi|472581774	RHTO_04263	glycosyltransferase family 32 protein	6	4	3	6	4	3	0.55067	1.0073	1.264	0.68621	1.0301	1.0237	1.02156	0.0827566
gi|472581459	RHTO_05140	glycosyltransferase family 69 protein	6	10	8	0	1	1	NaN	0.50152	0.66849	NaN	0.81562	0.91133	1.09574	0.13111
gi|472585691	RHTO_07584	glycosyltransferase family 77 protein	5	6	4	5	6	4	0.43627	0.37431	0.34523	0.53212	0.41543	0.35574	2.53795	0.236573
gi|472580879	RHTO_05749	glycosyltransferase family 8 protein	6	7	6	2	2	3	0.82062	0.78345	0.84647	1.0684	NaN	0.81426	1.16797	0.0850539
gi|472586200	RHTO_06787	glycosyltransferase family 90 protein	4	6	5	4	6	5	0.5415	0.6093	0.69619	0.61751	0.98159	1.1653	0.932148	0.0810425
gi|472586237	RHTO_06824	glycosyltransferase family 90 protein	0	1	1	0	1	1	NaN	0.43852	0.67915	NaN	0.73775	0.90402	1.19701	0.137721
gi|472586330	RHTO_06917	glycosyltransferase family 90 protein	2	4	6	1	1	1	0.28132	0.51981	0.5219	0.41436	0.91066	1.1545	0.928029	0.149103
gi|472587555	RHTO_02778	glycylpeptide N-tetradecanoyltransferase	4	4	6	4	4	6	0.94613	1.5324	1.1994	1.1611	0.67094	0.60017	1.57832	0.124273
gi|472587902	RHTO_03126	glycyl-tRNA synthetase	22	28	26	22	28	26	1.038	1.3584	1.5326	1.3732	1.8138	0.95667	0.790665	0.247337
gi|472584366	RHTO_01175	glyoxal oxidase	7	7	5	7	7	5	1.0019	0.52757	0.66855	1.2113	0.82918	NaN	1.20321	0.00396165
gi|472587143	RHTO_04821	Glyoxalase/bleomycin resistance protein/dioxygenase	3	2	3	3	2	3	0.93617	1.1461	1.6092	1.2756	0.54412	0.64167	1.54783	0.295437
gi|472585770	RHTO_07663	glyoxylate reductase	8	7	9	8	7	9	0.66284	0.65212	0.82631	0.92734	NaN	2.5153	0.532896	0.191385
gi|472582384	RHTO_03874	Gly-Xaa carboxypeptidase	4	6	5	4	6	5	0.32636	0.53344	0.69391	0.42205	1.8721	1.3739	0.708325	0.165269
gi|472582385	RHTO_03875	Gly-Xaa carboxypeptidase	3	2	3	3	2	3	0.13375	0.051059	0.22803	0.17322	1.1744	1.1442	0.897748	0.0616757
gi|472584205	RHTO_01458	GMP synthase	2	2	1	2	2	1	0.63632	1.1497	NaN	0.94032	1.2449	1.5008	0.740057	0.0690869
gi|472588166	RHTO_00066	GMP synthase (glutamine-hydrolysing)	27	20	21	27	20	21	1.0305	1.245	1.5397	1.4754	1.6733	1.054	0.795081	0.179619
gi|472581597	RHTO_04517	GNAT family acetyltransferase	6	5	4	6	5	4	1.7403	1.6164	1.9951	2.1345	1.8521	1.967	0.57221	0.0847099
gi|472584921	RHTO_00775	GNAT family acetyltransferase	0	0	1	0	0	1	NaN	NaN	1.8651	NaN	1.2309	1.4139	0.792192	0.0768395
gi|472588125	RHTO_00025	GOGAT, glutamate synthase	30	29	29	30	29	29	0.60785	0.66313	0.6667	0.81101	0.73346	0.87073	1.15904	0.199286
gi|472580406	RHTO_06582	Golgi complex component Cog3	2	3	3	2	3	3	0.2495	0.72686	0.85084	0.31289	1.2779	0.45012	1.42564	0.731627
gi|472580817	RHTO_05842	Golgi matrix protein	2	3	1	1	1	0	0.4644	0.51839	0.8831	0.68266	1.7199	1.0255	0.72904	0.214535
gi|472581058	RHTO_05560	Golgi membrane protein	2	2	0	2	2	0	0.83616	1.3572	NaN	1.1518	1.3384	NaN	0.826807	0.112637
gi|472585478	RHTO_07903	Golgi phosphoprotein 3 family protein	3	4	2	3	4	2	0.77566	0.92857	1.0113	1.0702	0.50045	0.4806	2.11677	0.140112
gi|472581853	RHTO_04343	golgi reassembly stacking protein 2	4	4	4	4	4	4	0.58064	0.95905	1.0239	0.74672	0.74034	0.8074	1.24199	0.107057
gi|472588631	RHTO_00531	golgi SNAP receptor complex member 1	2	2	1	2	2	1	0.83594	1.2386	1.1763	1.0247	1.2164	1.3887	0.782688	0.0548084
gi|472580661	RHTO_05976	golgi SNAP receptor complex member 2	1	2	1	1	2	1	0.56766	0.77975	0.84375	0.70532	1.3919	1.1071	0.918052	0.2074
gi|472585342	RHTO_07766	Golgi to Endosome transporter	7	9	8	7	9	8	0.68625	0.83086	0.74886	0.92929	1.141	1.0268	0.982256	0.110247
gi|472584353	RHTO_01162	Golgi transport protein Sly1	7	14	11	1	1	1	0.70944	0.48957	0.61287	0.928	0.62118	0.81555	1.40057	0.194199
gi|472587304	RHTO_04983	G-patch and DUF1604 domain containing protein	2	1	2	2	1	2	1.3653	NaN	18.028	1.7079	1.8346	0.78848	1.02262	0.41362
gi|472581652	RHTO_04376	GPCR, family 3, metabotropic glutamate receptor 5	0	1	1	0	1	1	NaN	0.95506	1.1344	NaN	0.29316	0.72292	2.09683	1.13959
gi|472581302	RHTO_05418	gpi anchored protein	0	1	1	0	1	1	NaN	0.79691	0.9201	NaN	1.4312	1.0997	0.742813	0.149439
gi|472581446	RHTO_05127	G-protein complex alpha subunit	7	6	5	7	6	5	0.72343	0.80883	1.0019	1.0795	1.0387	0.7515	1.18714	0.196844
gi|472585348	RHTO_07772	G-protein complex beta subunit	13	17	17	13	17	17	1.8155	1.8255	2.5177	2.3517	0.67276	0.9084	1.45121	0.334165
gi|472581937	RHTO_04180	gram domain protein	2	4	3	2	4	3	0.37744	0.7583	1.309	0.46223	0.61236	0.60571	1.72416	0.142606
gi|472588315	RHTO_00215	gram domain protein	4	2	1	2	1	0	0.6219	0.73614	1.7812	0.8983	1.2237	1.549	0.944706	0.379315
gi|472580773	RHTO_05798	GTP binding protein	0	1	2	0	1	2	NaN	NaN	1.1289	NaN	3.1926	2.3906	0.369558	0.0529496
gi|472584810	RHTO_00664	GTP binding protein	5	5	5	5	5	5	1.7583	1.7938	1.7469	2.3585	NaN	0.47447	2.30131	0.27393
gi|472586853	RHTO_06376	GTP binding protein	2	1	1	2	1	1	0.61943	0.51106	0.8556	0.84769	NaN	0.6222	#VALUE!	#VALUE!
gi|472588268	RHTO_00168	GTP binding protein	15	19	16	15	19	16	0.95904	1.1238	1.4423	1.2718	0.88684	1.09	1.13777	0.225601
gi|472586222	RHTO_06809	GTP cyclohydrolase I	9	5	9	9	5	9	1.2191	1.4409	1.7585	1.6504	0.88164	1.1525	0.998523	0.133352
gi|472585556	RHTO_07449	GTP cyclohydrolase II	2	3	3	2	3	3	0.29032	0.21935	0.54885	0.41576	0.47096	0.71264	1.53939	0.529157
gi|472587274	RHTO_04953	GTP cyclohydrolase II	1	3	2	1	3	2	0.67862	0.87551	1.2317	0.84523	0.90495	NaN	0.897916	0.292908
gi|472583055	RHTO_02665	GTPase activating protein	1	1	1	1	1	1	0.81922	0.14894	1.3955	0.98375	0.39624	NaN	1.64895	1.23712
gi|472583947	RHTO_01623	GTPase activating protein	2	2	2	2	2	2	0.39708	0.37393	0.75766	0.45451	2.8611	1.6726	0.449627	0.130988
gi|472586745	RHTO_06268	GTPase activating protein	1	1	1	1	1	1	NaN	NaN	2.0004	NaN	NaN	1.7694	#VALUE!	#VALUE!
gi|472581693	RHTO_04417	GTPase inhibitor	2	2	1	2	2	1	0.77905	0.94713	1.701	1.0657	0.61256	0.62824	1.57213	0.0722065
gi|472586976	RHTO_04654	GTPase inhibitor	1	2	1	1	2	1	0.10678	5.0121	NaN	0.14421	0.13241	NaN	6.13575	2.0033
gi|472586083	RHTO_07359	GTP-binding nuclear protein Ran	8	10	12	8	10	12	0.76139	0.91483	1.2987	1.077	1.7986	1.1788	0.70498	0.146248
gi|472583154	RHTO_02424	GTP-binding protein 1	1	1	2	1	1	2	0.60801	0.67962	1.0064	0.75618	1.5373	2.4972	0.52547	0.176807
gi|472588191	RHTO_00091	GTP-binding protein LepA	3	2	3	3	2	3	1.0518	1.2812	1.4105	1.2799	2.0104	1.9571	0.563036	0.102155
gi|472583178	RHTO_02448	GTP-binding protein SAR1	10	11	11	10	11	11	0.42213	0.59691	0.6748	0.58801	2.0157	2.0221	0.496997	0.00300819
gi|472584948	RHTO_00802	GTP-binding protein Sey1	7	10	7	7	10	7	0.46893	0.46676	0.66567	0.54222	1.2023	1.6869	0.706603	0.119871
gi|472581687	RHTO_04411	guanine nucleotide binding protein (G protein), alpha o polypeptide	4	5	4	4	5	4	0.55987	0.79658	0.94608	0.73646	1.468	1.5865	0.68218	0.0523597
gi|472584726	RHTO_01066	guanine nucleotide binding protein beta subunit 2	2	5	4	2	5	4	0.6229	0.72868	0.67512	0.8207	1.3323	1.3946	0.815592	0.142629
gi|472583092	RHTO_02360	guanine nucleotide exchange factor	2	3	0	2	3	0	0.41601	0.64137	NaN	0.5517	0.41052	0.51848	2.22799	0.265658
gi|472586836	RHTO_06359	guanine nucleotide exchange factor, Ric8	1	0	1	1	0	1	0.66718	NaN	1.2567	0.92751	2.0184	3.3345	0.348167	0.130041
gi|472585031	RHTO_07950	guanine nucleotide-binding protein gamma subunit	1	2	1	1	2	1	0.67867	0.62046	0.74184	0.84657	0.87025	1.0065	1.02936	0.106444
gi|472582254	RHTO_03994	guanosine-diphosphatase	1	1	1	1	1	1	1.4561	0.45877	0.59829	1.8256	1.0353	0.81792	1.06368	0.13885
gi|472585966	RHTO_07242	GYF domain containing protein	6	6	4	6	6	4	1.0751	1.283	1.3051	1.5085	0.51231	0.6247	1.72501	0.196824
gi|472587871	RHTO_03095	GYF domain containing protein	3	2	2	3	2	2	1.6645	1.4058	0.84489	2.327	0.46429	0.72865	1.71361	0.400011
gi|472585305	RHTO_07729	H/ACA ribonucleoprotein complex subunit 2	5	6	5	5	6	5	1.3601	1.8348	1.8946	1.4628	1.7984	1.181	0.779736	0.198839
gi|472588316	RHTO_00216	H/ACA ribonucleoprotein complex subunit 3	2	1	3	2	1	3	1.5282	3.0504	2.1079	1.9527	1.1168	1.1967	0.926693	0.110085
gi|472584915	RHTO_00769	HAD-superfamily hydrolase, subfamily IIB	10	13	11	10	13	11	0.48115	0.60994	0.79769	0.57512	1.5521	1.7907	0.726145	0.220347
gi|472585300	RHTO_07724	haloacid dehalogenase	1	4	2	1	4	2	0.26329	0.41119	0.6578	0.3286	0.68064	0.55304	1.67188	0.178972
gi|472586454	RHTO_07041	haloacid dehalogenase-like hydrolase domain containing 2	0	3	4	0	3	4	NaN	0.63411	0.89722	NaN	3.7166	NaN	0.83602	0.801798
gi|472585066	RHTO_07985	Haloacid dehalogenase-like hydrolase domain containing protein	4	5	7	4	5	7	0.4781	0.5432	0.77065	0.61078	NaN	NaN	#VALUE!	#VALUE!
gi|472585989	RHTO_07265	Haloacid dehalogenase-like hydrolase domain containing protein	2	4	2	2	4	2	0.73581	0.49188	1.0206	0.84551	NaN	1.1642	1.07172	0.300895
gi|472583672	RHTO_01762	Hamartin family protein	2	1	1	2	1	1	1.0596	3.7582	0.50957	1.4297	0.39545	NaN	2.46842	0.0853427
gi|472582898	RHTO_02508	HD domain containing protein	1	1	0	1	1	0	0.81271	1.0859	NaN	1.1795	1.4804	1.0986	0.849094	0.152514
gi|472582959	RHTO_02569	heat shock 70kDa protein 1/8	38	43	41	37	41	39	1.4184	1.3998	1.7245	1.7549	0.19914	0.23483	4.91981	0.616856
gi|472585418	RHTO_07842	heat shock 70kDa protein 1/8	47	48	45	47	47	44	0.92627	1.0313	1.3956	1.2032	2.0961	NaN	0.80429	0.46275
gi|472585892	RHTO_07168	Heat shock factor (HSF)-type transcription factor	1	0	4	1	0	4	0.32624	NaN	0.62713	0.44723	NaN	0.94477	#VALUE!	#VALUE!
gi|472583551	RHTO_02055	Heat shock protein DnaJ	1	1	1	1	1	1	0.50671	1.0781	0.55333	0.64293	0.95824	1.4415	1.18979	0.58309
gi|472587260	RHTO_04939	heat shock protein Hsp90	16	19	20	16	19	20	0.45008	0.57862	0.66211	0.585	1.2897	1.4255	1.01965	0.488472
gi|472585379	RHTO_07803	heat shock protein/chaperonin	21	28	35	21	28	35	1.313	1.496	1.9239	1.7048	0.43072	NaN	#VALUE!	#VALUE!
gi|472587097	RHTO_04775	heat shock protein/chaperonin	28	25	30	28	25	30	0.34589	0.34784	0.75121	0.43533	3.863	3.2298	0.284241	0.035886
gi|472584045	RHTO_01721	heat shock transcription factor	1	0	1	1	0	1	0.86408	NaN	0.92948	1.0504	2.252	2.2949	0.422515	0.0303947
gi|472584176	RHTO_01429	heat shock transcription factor	0	4	2	0	4	2	NaN	0.65458	0.76527	NaN	1.1129	1.0618	0.920175	0.0305779
gi|472586191	RHTO_06778	heat shock transcription factor	3	2	2	3	2	2	0.95933	0.67629	1.2609	1.1157	1.7157	1.2821	0.626486	0.136983
gi|472586274	RHTO_06861	heat shock transcription factor	6	6	8	6	6	8	0.68122	0.83292	0.98859	0.91054	0.81301	0.8823	1.22523	0.0895368
gi|472588187	RHTO_00087	helicase MOV-10	1	2	2	1	2	2	0.77363	0.89754	1.0067	0.88628	NaN	1.0461	1.01279	0.0804072
gi|472584329	RHTO_01138	helicase SWR1	3	3	4	3	3	4	0.73066	1.0494	0.74375	1.087	0.96777	0.92979	1.44294	0.673287
gi|472582852	RHTO_03442	helix-loop-helix dna-binding domain containing protein	1	1	0	1	1	0	0.36763	0.34185	NaN	0.52227	NaN	NaN	#VALUE!	#VALUE!
gi|472584534	RHTO_00874	heparinase II/III family protein	3	5	5	2	3	3	0.42674	0.42924	0.6277	0.56557	0.6695	1.1382	1.15042	0.313689
gi|472583816	RHTO_01906	het-c2 protein	9	9	10	9	9	10	0.71578	1.0314	1.1811	0.89521	0.19984	0.32552	5.8269	3.24555
gi|472580804	RHTO_05829	heterogeneous nuclear ribonucleoprotein M	10	12	11	10	12	11	0.82339	0.78694	0.97042	1.0375	2.959	2.3178	0.548658	0.287809
gi|472585001	RHTO_00855	Heterokaryon incompatibility Het-C family protein	10	14	11	10	14	11	0.35074	0.36054	0.38915	0.41742	0.89869	1.2744	1.2357	0.523453
gi|472584959	RHTO_00813	hexaprenyldihydroxybenzoate methyltransferase	1	0	2	1	0	2	0.70538	NaN	0.8916	0.90267	0.58969	0.77874	1.31909	0.360514
gi|472588564	RHTO_00464	hexaprenyl-diphosphate synthase	3	2	4	3	2	4	0.7525	0.95146	1.0885	1.0875	0.41372	0.5863	2.1084	0.364955
gi|472586909	RHTO_04586	hexosaminidase, glycoside hydrolase family 20 protein	0	2	2	0	2	2	NaN	0.60095	0.58986	NaN	NaN	NaN	#VALUE!	#VALUE!
gi|472585972	RHTO_07248	High mobility group, HMG1/HMG2 domain containing protein	17	17	18	11	11	12	0.97936	1.7481	1.14	1.2897	1.1792	0.44374	1.5508	0.993866
gi|472587919	RHTO_03143	high-glucose-regulated protein 8	1	1	1	1	1	1	0.61859	0.66092	NaN	0.83305	0.35077	1.3727	1.67849	1.07852
gi|472584053	RHTO_01729	histidine acid phosphatase	1	1	4	1	1	4	0.60604	0.54877	0.68608	0.80177	0.30096	NaN	2.47668	1.19646
gi|472588618	RHTO_00518	histidinol dehydrogenase	12	9	9	12	9	9	1.1108	1.1174	1.535	1.3323	1.4018	0.84175	0.940303	0.237997
gi|472586337	RHTO_06924	histidinol-phosphatase	4	5	4	4	5	4	0.94818	1.594	1.2188	1.1921	0.93622	1.2823	0.923987	0.203842
gi|472586731	RHTO_06254	histidinol-phosphate transaminase	13	13	13	2	2	2	1.1406	1.6423	2.0522	1.4963	0.63255	1.5062	1.12241	0.648403
gi|472588321	RHTO_00221	histidyl-trna synthetase	8	11	11	8	11	11	0.87966	0.98209	1.5034	1.167	1.2523	NaN	0.903237	0.148077
gi|472587741	RHTO_02965	histone acetyltransferase 1	2	2	1	2	2	1	0.9387	0.70789	1.0321	1.036	1.7053	NaN	0.849173	0.371607
gi|472581718	RHTO_04442	histone acetyltransferase Esa1	2	1	3	2	1	3	0.60584	1.2229	0.47172	0.78569	0.23757	NaN	6.60388	3.38646
gi|472586609	RHTO_06132	histone acetyltransferase Gcn5	1	1	3	1	1	3	1.1872	1.5836	1.0303	1.5859	NaN	NaN	#VALUE!	#VALUE!
gi|472588018	RHTO_03243	histone acetyltransferase mst2	1	1	1	1	1	1	0.97429	1.2488	NaN	1.1032	1.1062	1.7946	0.683326	0.191755
gi|472588682	RHTO_00582	Histone chaperone domain CHZ domain protein	8	7	9	4	3	5	0.38725	0.44984	0.53588	0.44026	0.71928	0.33923	1.77604	1.03436
gi|472584340	RHTO_01149	histone deacetylase 1/2	3	3	2	3	3	2	0.72151	0.69109	0.86974	0.87974	1.1841	1.0224	0.964353	0.113586
gi|472585964	RHTO_07240	histone deacetylase 1/2	5	8	6	5	8	6	0.88835	1.0892	1.4772	1.2409	NaN	NaN	#VALUE!	#VALUE!
gi|472580635	RHTO_05950	histone deacetylase 6/10	5	8	6	5	8	6	0.6891	1.2475	1.0942	0.88304	0.9504	0.46199	1.60837	0.786558
gi|472584504	RHTO_01314	histone deacetylase complex subunit SAP18	4	4	3	4	4	3	0.66034	0.85903	1.0619	0.91204	1.7297	0.88151	0.842848	0.279112
gi|472581562	RHTO_04482	Histone deacetylation protein Rxt3	2	1	1	2	1	1	0.6477	0.57868	0.8246	0.73223	2.0725	2.0416	0.71206	0.391287
gi|472587789	RHTO_03013	histone demethylase JARID1	2	3	4	2	3	4	0.63538	1.6873	0.80292	0.79712	0.95829	0.71219	1.46048	0.447799
gi|472582971	RHTO_02581	Histone H1/H5	5	6	8	5	6	8	0.47427	0.25156	0.76311	0.6684	NaN	NaN	#VALUE!	#VALUE!
gi|472580812	RHTO_05837	histone H2A	3	4	3	1	1	1	1.1992	1.3863	1.3529	1.6119	0.88586	0.76101	1.36785	0.269959
gi|472585310	RHTO_07734	histone H2A	6	7	7	4	5	5	0.64947	0.98325	0.77715	0.78864	NaN	NaN	#VALUE!	#VALUE!
gi|472581942	RHTO_04185	histone H3	8	10	9	3	4	5	0.42228	0.64267	1.122	0.56613	1.6747	0.52575	1.00999	0.77325
gi|472582049	RHTO_04043	Histone H3	4	7	8	1	3	5	0.42965	0.5568	0.73122	0.52952	0.25409	2.2089	2.19416	2.46278
gi|472587205	RHTO_04884	histone H4B	1	0	1	1	0	1	0.33145	NaN	0.47917	0.4008	1.0728	1.1098	0.918174	0.0157754
gi|472583043	RHTO_02653	Histone H5 family protein	0	0	1	0	0	1	NaN	NaN	0.6798	NaN	NaN	0.50376	#VALUE!	#VALUE!
gi|472583631	RHTO_02135	histone-binding protein	1	5	4	1	5	4	0.55512	0.71068	1.007	0.73084	1.04	1.2152	0.98295	0.17175
gi|472588650	RHTO_00550	histone-binding protein RBBP4	5	4	1	5	4	1	0.75379	0.85037	1.2884	1.0064	2.067	NaN	0.654744	0.241762
gi|472587321	RHTO_05000	histone-like transcription factor (CBF/NF-Y)	2	3	1	2	3	1	0.5642	0.4045	0.70499	0.91607	0.58472	0.55026	1.85437	0.165815
gi|472586498	RHTO_06021	histone-lysine N-methyltransferase ASH1L	2	4	0	2	4	0	1.1005	0.69565	NaN	1.4476	NaN	NaN	#VALUE!	#VALUE!
gi|472586221	RHTO_06808	histone-lysine N-methyltransferase SETD1	2	1	0	2	1	0	0.9193	0.29311	NaN	1.2917	1.0598	NaN	0.929956	0.0192587
gi|472582743	RHTO_03333	histone-lysine N-methyltransferase SETD2	1	3	2	1	3	2	2.2463	2.1568	1.6316	2.4907	1.4768	1.1745	0.831086	0.144851
gi|472585049	RHTO_07968	histone-lysine N-methyltransferase, H3 lysine-79 specific	0	0	1	0	0	1	NaN	NaN	1.7719	NaN	0.10353	0.14973	6.11328	3.85964
gi|472585271	RHTO_07695	Hit-like protein involved in cell-cycle regulation	4	3	2	4	3	2	0.50084	0.48438	0.74545	0.67018	0.97254	0.92461	1.07174	0.0395227
gi|472587526	RHTO_02748	HLH transcription regulator	2	1	0	2	1	0	0.189	0.11961	NaN	0.2119	1.3982	1.0299	0.834389	0.128766
gi|472583365	RHTO_02286	holocytochrome-c synthase	1	2	2	1	2	2	1.13	1.6527	1.1951	1.4072	0.64503	1.7454	1.22304	0.563009
gi|472585272	RHTO_07696	holocytochrome-c synthase	0	1	2	0	1	2	NaN	1.4764	2.7792	NaN	0.57409	0.79057	2.02279	0.930685
gi|472581416	RHTO_05318	homoaconitate hydratase	9	14	14	9	14	14	1.156	1.7793	1.9799	1.469	0.49631	NaN	2.16712	0.21532
gi|472586392	RHTO_06979	homocitrate synthase	23	24	25	23	24	25	1.4774	1.8551	2.2618	1.9986	1.0181	1.1495	1.12471	0.34859
gi|472588171	RHTO_00071	homocysteine S-methyltransferase	2	3	3	2	3	3	1.0475	0.97222	1.4399	1.4383	NaN	0.45644	2.68087	0.692972
gi|472586130	RHTO_06717	homoisocitrate dehydrogenase	11	11	12	11	11	12	1.017	1.3858	1.7742	1.3605	1.0484	1.8197	0.983051	0.448831
gi|472580777	RHTO_05802	homoserine dehydrogenase	8	7	6	8	7	6	0.68207	1.158	1.3885	1.0213	0.87568	NaN	#VALUE!	#VALUE!
gi|472587238	RHTO_04917	homoserine o-acetyltransferase	3	3	3	3	3	3	2.8923	1.8405	3.0879	4.0134	NaN	NaN	#VALUE!	#VALUE!
gi|472586170	RHTO_06757	hsp90 co-chaperone cdc37	6	10	9	2	5	3	0.72629	0.70968	1.1263	1.0577	1.1824	1.257	0.718483	0.178715
gi|472583004	RHTO_02614	Hyaluronan/mRNA-binding protein	12	13	13	12	13	13	0.76237	0.9258	1.0742	0.99747	NaN	NaN	#VALUE!	#VALUE!
gi|472584502	RHTO_01311	hydroxyacid-oxoacid transhydrogenase	2	2	1	2	2	1	0.44855	0.43529	0.66925	0.6164	0.5014	0.6174	1.63884	0.346394
gi|472584984	RHTO_00838	hydroxyacylglutathione hydrolase	6	10	6	6	10	6	0.46226	0.38208	0.75461	0.61935	0.23479	NaN	2.51489	2.46672
gi|472585230	RHTO_08149	hydroxymethylbilane synthase	5	8	6	5	8	6	0.78855	1.6129	1.1436	1.0679	NaN	NaN	#VALUE!	#VALUE!
gi|472582051	RHTO_04045	hydroxymethylglutaryl-CoA reductase (NADPH)	6	3	5	6	3	5	0.75765	1.1095	1.3386	0.95326	0.35811	3.2799	1.54866	1.75896
gi|472583396	RHTO_02305	hydroxymethylglutaryl-CoA synthase	17	16	17	4	4	5	0.82431	1.4177	2.1429	1.0249	2.5125	2.5564	0.426797	0.0558852
gi|472580292	RHTO_06688	hypothetical protein	2	2	0	1	2	0	0.4894	2.9256	NaN	0.71277	0.75693	NaN	2.10386	1.10695
gi|472580352	RHTO_06656	hypothetical protein	1	0	0	1	0	0	0.58621	NaN	NaN	0.75459	0.2886	NaN	2.66068	1.13749
gi|472580394	RHTO_06570	hypothetical protein	1	0	1	1	0	1	0.55721	NaN	1.0498	0.77852	NaN	1.0224	#VALUE!	#VALUE!
gi|472580493	RHTO_06514	hypothetical protein	2	1	0	2	1	0	0.38867	0.3469	NaN	0.41527	2.7047	2.3183	0.514692	0.200105
gi|472580516	RHTO_06451	hypothetical protein	3	5	6	3	5	6	0.78417	1.1925	1.254	1.04	10.928	1.09	0.545772	0.419112
gi|472580527	RHTO_06462	hypothetical protein	1	1	2	1	1	2	0.12097	0.14938	0.22458	0.1825	NaN	0.47313	1.68834	0.60138
gi|472580609	RHTO_06441	hypothetical protein	2	2	0	2	2	0	0.74414	1.8746	NaN	0.88378	0.55056	NaN	1.40578	0.580612
gi|472580616	RHTO_06448	hypothetical protein	0	0	1	0	0	1	NaN	NaN	0.98188	NaN	0.68605	0.62074	1.76367	0.404618
gi|472580636	RHTO_05951	hypothetical protein	1	1	3	1	1	3	0.515	0.85196	1.5769	0.54583	1.0992	0.85568	1.01687	0.135112
gi|472580683	RHTO_05998	hypothetical protein	1	1	3	1	1	2	0.44806	1.0454	1.2624	0.63208	0.59021	0.92338	1.45251	0.325065
gi|472580782	RHTO_05807	hypothetical protein	0	2	0	0	2	0	NaN	0.35656	NaN	NaN	0.91409	0.79057	1.11055	0.146777
gi|472580790	RHTO_05815	hypothetical protein	0	1	1	0	1	1	NaN	3.5823	3.5811	NaN	1.7244	1.1844	0.712111	0.186957
gi|472580887	RHTO_05757	hypothetical protein	8	9	8	8	9	8	1.8203	2.0375	2.5795	2.579	NaN	NaN	#VALUE!	#VALUE!
gi|472581054	RHTO_05556	hypothetical protein	0	1	1	0	1	1	NaN	0.86367	1.0717	NaN	NaN	1.6312	0.688494	0.1067
gi|472581105	RHTO_05607	hypothetical protein	2	3	1	1	1	1	1.5475	1.6145	1.3385	1.9356	0.78867	1.067	1.27213	0.337036
gi|472581209	RHTO_05526	hypothetical protein	1	1	1	1	1	1	0.60107	0.7131	0.91872	0.76203	1.3527	NaN	0.874773	0.191642
gi|472581237	RHTO_05353	hypothetical protein	2	0	1	2	0	1	0.71604	NaN	1.0036	0.93489	0.23766	1.2601	2.50064	2.41414
gi|472581320	RHTO_05436	hypothetical protein	2	3	3	1	1	1	0.40596	0.96248	1.0316	0.45045	1.1202	1.3628	0.936624	0.227999
gi|472581340	RHTO_05241	hypothetical protein	0	1	0	0	1	0	NaN	NaN	NaN	NaN	0.71463	0.87012	1.37934	0.220757
gi|472581354	RHTO_05256	hypothetical protein	1	3	2	1	3	2	0.70883	0.54524	1.1783	0.92676	0.27432	NaN	2.88602	1.07389
gi|472581379	RHTO_05281	hypothetical protein	1	2	3	1	2	3	0.080201	0.17118	0.35122	0.10633	1.2879	0.80514	0.971726	0.241679
gi|472581445	RHTO_05126	hypothetical protein	4	4	5	4	4	5	0.80657	2.3799	2.229	1.1408	1.5138	NaN	#VALUE!	#VALUE!
gi|472581676	RHTO_04400	hypothetical protein	3	2	2	3	2	2	0.354	0.68433	1.1795	0.55258	NaN	NaN	#VALUE!	#VALUE!
gi|472581721	RHTO_04445	hypothetical protein	5	4	2	1	2	1	0.85643	0.47976	0.86096	1.0232	0.47222	NaN	#VALUE!	#VALUE!
gi|472581789	RHTO_04278	hypothetical protein	1	1	1	1	1	1	0.38786	0.40061	0.6371	0.45403	3.3637	NaN	0.65705	0.508775
gi|472581797	RHTO_04286	hypothetical protein	1	0	0	1	0	0	0.26817	NaN	NaN	0.37652	1.8901	1.5607	0.658473	0.139118
gi|472581868	RHTO_04358	hypothetical protein	0	1	1	0	1	1	NaN	0.83651	0.46504	NaN	NaN	NaN	#VALUE!	#VALUE!
gi|472581906	RHTO_04149	hypothetical protein	3	6	7	3	6	7	0.5103	0.37487	1.4209	0.68676	2.6088	1.61	0.405916	0.204841
gi|472581984	RHTO_04227	hypothetical protein	1	2	1	1	2	1	0.45013	0.23598	NaN	0.61325	1.0127	NaN	#VALUE!	#VALUE!
gi|472582004	RHTO_04247	hypothetical protein	2	7	7	1	4	4	0.79414	1.1319	0.87868	1.0875	2.7339	2.0203	0.430377	0.0913569
gi|472582028	RHTO_04022	hypothetical protein	0	1	1	0	1	1	NaN	0.82991	1.2912	NaN	0.21456	0.18437	4.84697	0.50996
gi|472582232	RHTO_03972	hypothetical protein	0	2	2	0	2	2	NaN	0.55694	1.4478	NaN	NaN	1.7373	0.534339	0.05836
gi|472582240	RHTO_03980	hypothetical protein	1	2	0	1	2	0	0.74009	1.1037	NaN	0.99212	1.8583	1.5891	0.708361	0.220667
gi|472582250	RHTO_03990	hypothetical protein	1	1	0	0	1	0	0.69158	1.3608	NaN	0.89933	0.39268	0.37636	2.51799	0.155333
gi|472582344	RHTO_03834	hypothetical protein	1	3	1	1	3	1	0.081529	0.19375	NaN	0.11113	2.0678	1.0855	0.70242	0.30945
gi|472582442	RHTO_03662	hypothetical protein	1	2	2	1	0	0	0.74259	NaN	NaN	0.74496	NaN	0.71863	1.26101	0.184586
gi|472582451	RHTO_03671	hypothetical protein	1	2	4	1	2	4	1.2905	1.0047	1.7207	1.6985	1.2197	0.76911	1.10943	0.254946
gi|472582453	RHTO_03673	hypothetical protein	2	3	3	2	3	3	0.86778	0.60919	0.38656	1.0101	1.7964	NaN	#VALUE!	#VALUE!
gi|472582548	RHTO_03462	hypothetical protein	8	7	8	8	7	8	0.73621	1.1053	1.1049	0.93419	0.40711	0.40366	2.29307	0.301162
gi|472582550	RHTO_03464	hypothetical protein	2	0	0	2	0	0	0.84835	NaN	NaN	1.1444	0.75014	0.51363	1.78842	0.40035
gi|472582621	RHTO_03535	hypothetical protein	0	1	1	0	1	1	NaN	0.72956	0.41052	NaN	NaN	0.34367	2.50185	0.576882
gi|472582702	RHTO_03616	hypothetical protein	3	2	4	3	2	4	0.85843	1.2907	0.91476	1.2255	NaN	0.89311	#VALUE!	#VALUE!
gi|472582717	RHTO_03307	hypothetical protein	1	1	1	1	1	1	0.5826	1.5694	2.0106	0.85921	2.2709	NaN	#VALUE!	#VALUE!
gi|472582730	RHTO_03320	hypothetical protein	2	1	1	1	1	1	0.40699	0.74134	0.66621	0.51712	0.9038	1.3476	0.953064	0.188902
gi|472582790	RHTO_03380	hypothetical protein	4	0	0	2	0	0	2.1629	NaN	NaN	2.8018	2.6133	1.3508	1.32469	1.33396
gi|472582847	RHTO_03437	hypothetical protein	5	3	6	5	3	6	0.48376	0.80159	0.76696	0.60217	0.80666	0.60651	1.44423	0.289276
gi|472582848	RHTO_03438	hypothetical protein	0	0	1	0	0	1	NaN	NaN	NaN	NaN	NaN	0.28045	4.88017	1.85894
gi|472582951	RHTO_02561	hypothetical protein	3	2	1	3	2	1	1.3432	1.4455	0.49962	1.8839	0.58067	NaN	#VALUE!	#VALUE!
gi|472582962	RHTO_02572	hypothetical protein	3	5	4	0	2	1	NaN	0.20022	2.4119	NaN	1.0188	NaN	0.6587	0.456575
gi|472583010	RHTO_02620	hypothetical protein	3	2	0	3	2	0	0.49626	1.1173	NaN	0.62994	1.8287	1.4649	0.614739	0.0960279
gi|472583094	RHTO_02362	hypothetical protein	0	1	1	0	1	1	NaN	0.72343	0.84061	NaN	0.67278	0.90506	1.29563	0.269741
gi|472583102	RHTO_02371	hypothetical protein	6	5	3	4	5	2	0.77628	0.86187	1.1914	1.0854	0.53699	0.65751	1.34853	0.618173
gi|472583138	RHTO_02408	hypothetical protein	0	0	1	0	0	1	NaN	NaN	0.50218	NaN	NaN	1.1514	#VALUE!	#VALUE!
gi|472583168	RHTO_02438	hypothetical protein	3	3	4	2	1	0	0.63012	0.81273	1.3101	0.85881	1.8309	1.4467	0.595118	0.0832389
gi|472583182	RHTO_02452	hypothetical protein	2	2	0	2	2	0	0.87492	1.9512	NaN	1.2111	0.88094	0.7872	1.27823	0.147186
gi|472583197	RHTO_02467	hypothetical protein	2	1	2	2	1	2	0.39619	0.50556	0.59047	0.49126	0.085817	0.05955	11.9794	4.65846
gi|472583305	RHTO_02203	hypothetical protein	1	0	0	1	0	0	0.3188	NaN	NaN	0.3654	0.76674	0.62476	1.41587	0.161147
gi|472583462	RHTO_01965	hypothetical protein	2	2	0	2	2	0	0.88063	0.88171	NaN	1.0913	NaN	1.2901	#VALUE!	#VALUE!
gi|472583511	RHTO_02015	hypothetical protein	8	5	4	8	5	4	0.86049	1.1542	1.1529	1.0366	3.3371	2.1397	0.383508	0.118577
gi|472583520	RHTO_02024	hypothetical protein	2	5	5	2	5	5	0.37749	0.087924	0.14672	0.49947	0.43875	0.43751	3.29382	1.75178
gi|472583607	RHTO_02111	hypothetical protein	1	2	3	1	2	3	0.73932	0.8125	1.048	0.90462	1.6965	NaN	0.656545	0.0948884
gi|472583628	RHTO_02132	hypothetical protein	2	2	2	2	2	2	0.80191	1.4957	1.0609	1.224	0.89578	0.67692	1.29681	0.255219
gi|472583658	RHTO_01748	hypothetical protein	2	2	1	1	1	1	0.46664	0.57615	1.6723	0.64689	0.71522	0.52716	1.36667	0.546713
gi|472583711	RHTO_01801	hypothetical protein	2	3	3	2	3	3	0.25503	0.44019	0.78525	0.32663	2.0415	1.3699	0.6604	0.148545
gi|472583712	RHTO_01802	hypothetical protein	2	2	0	2	2	0	0.371	0.41511	NaN	0.43115	2.1577	2.3378	0.368814	0.134197
gi|472583714	RHTO_01804	hypothetical protein	1	2	1	1	2	1	0.53994	0.96975	1.1844	0.65704	NaN	NaN	#VALUE!	#VALUE!
gi|472583794	RHTO_01884	hypothetical protein	1	0	3	1	0	3	0.22496	NaN	0.46408	0.31537	NaN	NaN	#VALUE!	#VALUE!
gi|472583977	RHTO_01653	hypothetical protein	2	4	2	2	4	2	0.52585	0.82578	1.7988	0.69167	0.38938	NaN	3.15479	0.829584
gi|472584002	RHTO_01678	hypothetical protein	0	1	0	0	1	0	NaN	0.72451	NaN	NaN	1.4741	1.4434	0.710298	0.0433919
gi|472584115	RHTO_01368	hypothetical protein	1	0	0	1	0	0	0.40262	NaN	NaN	0.50314	1.3845	1.4241	0.694212	0.0328014
gi|472584166	RHTO_01419	hypothetical protein	5	4	5	5	4	5	1.4583	1.1964	1.4458	1.9449	1.198	1.2658	0.939248	0.220894
gi|472584188	RHTO_01441	hypothetical protein	1	0	0	1	0	0	NaN	NaN	NaN	NaN	1.1712	2.2181	0.779621	0.298678
gi|472584226	RHTO_01479	hypothetical protein	2	1	2	2	1	2	0.49895	0.4424	0.65229	0.7678	1.7029	0.98597	0.732897	0.243692
gi|472584236	RHTO_01489	hypothetical protein	1	1	0	1	1	0	0.95752	0.2084	NaN	1.2976	0.95705	1.5032	0.841464	0.191271
gi|472584470	RHTO_01279	hypothetical protein	1	0	0	1	0	0	1.309	NaN	NaN	1.6777	1.2859	1.4244	0.709436	0.0648527
gi|472584471	RHTO_01280	hypothetical protein	0	2	1	0	1	0	NaN	0.26883	3.0694	NaN	0.96761	1.2115	0.936851	0.104813
gi|472584503	RHTO_01312	hypothetical protein	8	6	5	8	6	5	1.6484	2.3485	2.4507	2.0358	1.2696	1.3928	0.748735	0.035545
gi|472584562	RHTO_00902	hypothetical protein	2	1	0	2	1	0	0.2545	0.58774	NaN	0.34643	1.4187	1.3353	0.789671	0.110958
gi|472584613	RHTO_00953	hypothetical protein	2	2	0	2	2	0	0.42283	0.27176	NaN	0.53869	0.48452	0.38122	2.34353	0.395456
gi|472584623	RHTO_00963	hypothetical protein	0	1	1	0	1	1	NaN	NaN	1.0286	NaN	1.1251	1.3989	0.888846	0.174016
gi|472584663	RHTO_01003	hypothetical protein	3	3	3	2	2	3	1.0886	2.3881	2.4201	1.3459	0.93006	0.51271	1.51579	0.437641
gi|472584709	RHTO_01049	hypothetical protein	2	1	2	2	1	2	1.2517	9.7717	1.201	1.5914	1.1141	1.0788	0.854219	0.101615
gi|472584874	RHTO_00728	hypothetical protein	11	7	6	1	0	1	0.52605	NaN	0.51548	0.7917	1.1631	1.532	0.764283	0.104444
gi|472584973	RHTO_00827	hypothetical protein	1	2	0	1	2	0	0.69623	0.68151	NaN	1.0048	0.68147	0.74831	1.36805	0.087911
gi|472585000	RHTO_00854	hypothetical protein	1	1	3	1	1	3	0.3368	0.63207	0.66007	0.44996	0.6439	0.68146	1.51024	0.0605274
gi|472585017	RHTO_07936	hypothetical protein	2	2	3	2	2	3	0.71064	1.0412	0.90995	1.0286	1.6203	1.2396	0.8094	0.193588
gi|472585125	RHTO_08044	hypothetical protein	1	3	2	1	3	2	0.48581	0.53646	1.1509	0.63282	0.65942	0.6776	1.89801	0.696358
gi|472585141	RHTO_08060	hypothetical protein	1	1	1	1	1	1	0.66968	0.66624	0.75341	1.028	2.2815	1.8946	0.48585	0.0450136
gi|472585157	RHTO_08076	hypothetical protein	0	1	1	0	1	1	NaN	1.4999	1.2513	NaN	0.45205	0.34656	2.63076	0.365366
gi|472585199	RHTO_08118	hypothetical protein	1	0	0	1	0	0	0.9832	NaN	NaN	1.188	NaN	0.93109	#VALUE!	#VALUE!
gi|472585205	RHTO_08124	hypothetical protein	1	0	3	1	0	3	1.0925	NaN	1.813	1.309	NaN	NaN	#VALUE!	#VALUE!
gi|472585361	RHTO_07785	hypothetical protein	2	5	4	1	3	3	0.48654	0.75037	1.1722	0.62064	0.9274	0.74721	1.27096	0.169359
gi|472585394	RHTO_07818	hypothetical protein	2	2	1	1	1	0	0.77393	1.1184	NaN	0.98982	NaN	0.44677	#VALUE!	#VALUE!
gi|472585533	RHTO_07426	hypothetical protein	0	1	1	0	1	1	NaN	0.20281	1.3459	NaN	1.2122	0.83291	1.01278	0.265634
gi|472585635	RHTO_07528	hypothetical protein	1	1	2	1	1	2	0.68705	1.0267	1.2841	0.84503	1.3777	0.9888	0.83618	0.153379
gi|472585683	RHTO_07576	hypothetical protein	8	7	9	8	7	9	0.53876	0.58001	1.0054	0.62916	0.37973	0.41753	2.27245	0.435426
gi|472585700	RHTO_07593	hypothetical protein	1	3	1	1	3	1	0.4154	0.24611	NaN	0.47022	0.24753	0.33553	2.83921	1.27714
gi|472585856	RHTO_07132	hypothetical protein	1	2	3	1	2	3	0.8171	1.024	0.80317	1.1152	NaN	1.8427	#VALUE!	#VALUE!
gi|472585872	RHTO_07148	hypothetical protein	1	1	0	1	1	0	NaN	1.2334	NaN	NaN	0.56716	NaN	1.83964	0.108146
gi|472585995	RHTO_07271	hypothetical protein	0	0	1	0	0	1	NaN	NaN	NaN	NaN	2.9196	1.7594	0.598146	0.271744
gi|472586046	RHTO_07322	hypothetical protein	0	1	0	0	1	0	NaN	0.39512	NaN	NaN	NaN	NaN	#VALUE!	#VALUE!
gi|472586273	RHTO_06860	hypothetical protein	1	1	1	1	1	1	0.79614	2.7301	NaN	0.98347	1.1646	NaN	0.966487	0.152485
gi|472586347	RHTO_06934	hypothetical protein	1	2	1	1	2	1	1.099	1.846	1.5302	1.2413	0.43184	0.76195	1.58632	0.638124
gi|472586381	RHTO_06968	hypothetical protein	2	0	0	2	0	0	0.40494	NaN	NaN	0.52614	0.98359	1.1773	0.916596	0.0883588
gi|472586591	RHTO_06114	hypothetical protein	1	1	1	1	1	1	3.1491	2.2498	1.7362	4.688	1.0517	1.3858	0.725222	0.223832
gi|472586666	RHTO_06189	hypothetical protein	0	1	0	0	1	0	NaN	0.96048	NaN	NaN	0.61124	1.03	1.2919	0.333173
gi|472586676	RHTO_06199	hypothetical protein	4	6	5	0	2	1	NaN	1.9989	1.9297	NaN	1.011	1.2975	0.965446	0.184042
gi|472586755	RHTO_06278	hypothetical protein	16	21	15	16	21	15	0.19694	0.19088	0.19329	0.2244	0.83185	0.98021	1.1805	0.150654
gi|472586762	RHTO_06285	hypothetical protein	5	0	1	5	0	1	1.4513	NaN	1.8736	2.0281	1.4182	1.4018	0.736251	0.0469585
gi|472586841	RHTO_06364	hypothetical protein	4	1	2	4	1	2	0.83544	1.6212	1.7229	1.0442	0.76908	1.2546	1.14451	0.301429
gi|472586847	RHTO_06370	hypothetical protein	1	2	3	1	2	3	0.30145	0.37337	0.40816	0.42547	0.4337	0.66102	2.07462	0.489074
gi|472587010	RHTO_04688	hypothetical protein	0	1	2	0	1	2	NaN	1.5759	1.0603	NaN	1.3617	1.3944	0.719531	0.0138106
gi|472587024	RHTO_04702	hypothetical protein	1	0	1	1	0	1	0.68872	NaN	0.71588	0.88457	1.6228	1.5277	0.641151	0.0216135
gi|472587045	RHTO_04723	hypothetical protein	1	4	2	1	4	2	0.6487	1.0023	0.78585	0.82767	0.47526	0.22541	3.27024	1.64915
gi|472587120	RHTO_04798	hypothetical protein	0	1	1	0	1	1	NaN	1.378	NaN	NaN	1.1194	0.80319	1.02634	0.190868
gi|472587125	RHTO_04803	hypothetical protein	2	2	3	2	2	3	0.40576	0.37468	0.43855	0.514	0.50291	0.65067	1.53616	0.452631
gi|472587183	RHTO_04862	hypothetical protein	2	1	1	2	1	1	0.36621	0.64248	0.49905	0.47956	0.9675	1.3535	0.839692	0.167968
gi|472587259	RHTO_04938	hypothetical protein	2	0	1	2	0	1	0.33301	NaN	0.36804	0.47757	1.3853	1.6117	0.660245	0.0541138
gi|472587284	RHTO_04963	hypothetical protein	0	0	1	0	0	1	NaN	NaN	0.70474	NaN	1.1638	1.1951	0.909591	0.107267
gi|472587313	RHTO_04992	hypothetical protein	0	1	0	0	1	0	NaN	1.9705	NaN	NaN	1.8695	1.1303	0.635992	0.216659
gi|472587402	RHTO_05081	hypothetical protein	2	1	1	2	1	1	0.78866	0.81789	1.2696	0.98942	0.89513	1.0047	1.01818	0.0897568
gi|472587448	RHTO_02670	hypothetical protein	2	1	1	2	1	1	0.28553	2.3164	1.3499	0.35074	1.8161	0.90922	1.09621	0.543775
gi|472587457	RHTO_02679	hypothetical protein	0	1	1	0	1	1	NaN	0.65911	0.61503	NaN	NaN	1.7501	0.572445	0.00148296
gi|472587479	RHTO_02701	hypothetical protein	2	2	1	2	2	1	0.12989	NaN	0.29763	0.16143	2.6613	1.1926	0.60713	0.327212
gi|472587489	RHTO_02711	hypothetical protein	1	2	2	1	2	2	NaN	0.44455	NaN	NaN	0.26753	0.25005	3.40361	0.815836
gi|472587582	RHTO_02805	hypothetical protein	1	2	0	1	2	0	2.416	0.94531	NaN	2.9775	0.8646	1.0447	0.993907	0.147806
gi|472587619	RHTO_02842	hypothetical protein	0	1	2	0	1	2	NaN	1.4463	1.4284	NaN	1.1372	1.1602	0.949434	0.136758
gi|472587807	RHTO_03031	hypothetical protein	0	3	1	0	3	1	NaN	0.595	0.96262	NaN	0.81896	0.10772	3.93538	4.63163
gi|472587918	RHTO_03142	hypothetical protein	1	1	2	1	1	2	1.0519	0.47558	0.72732	1.5095	0.77008	NaN	#VALUE!	#VALUE!
gi|472587955	RHTO_03180	hypothetical protein	1	1	1	1	1	1	NaN	NaN	1.1468	NaN	0.70913	1.205	1.37768	0.532293
gi|472587994	RHTO_03219	hypothetical protein	3	3	3	3	3	3	1.4317	1.335	1.4101	1.825	0.59377	0.55502	1.71089	0.080869
gi|472588015	RHTO_03240	hypothetical protein	1	1	1	1	1	1	0.55278	0.68655	0.73122	0.69969	1.0229	0.93387	0.981789	0.0870109
gi|472588066	RHTO_03291	hypothetical protein	13	18	14	13	18	14	0.093647	0.077909	0.066814	0.13346	1.1128	NaN	0.972368	0.104275
gi|472588070	RHTO_03295	hypothetical protein	1	2	1	1	2	1	0.48804	0.60854	0.63639	0.74472	1.0236	1.1121	0.962726	0.0577448
gi|472588150	RHTO_00050	hypothetical protein	0	0	1	0	0	1	NaN	NaN	1.3037	NaN	0.70752	0.76405	1.43988	0.146127
gi|472588183	RHTO_00083	hypothetical protein	0	1	1	0	1	1	NaN	2.6369	1.9897	NaN	0.79068	NaN	#VALUE!	#VALUE!
gi|472588186	RHTO_00086	hypothetical protein	1	1	1	1	1	1	0.15588	0.38553	0.40082	0.18809	1.3505	2.2532	0.677509	0.209439
gi|472588237	RHTO_00137	hypothetical protein	2	1	0	2	1	0	1.0833	1.4701	NaN	1.3819	0.29026	NaN	2.30484	1.6127
gi|472588283	RHTO_00183	hypothetical protein	0	1	2	0	1	2	NaN	0.75769	0.67559	NaN	0.58212	0.98003	1.38909	0.350453
gi|472588372	RHTO_00272	hypothetical protein	2	2	2	2	2	2	0.88346	0.6135	0.53541	1.2424	1.6439	1.6819	0.638714	0.0649293
gi|472588436	RHTO_00336	hypothetical protein	5	5	4	3	3	3	1.139	1.8742	1.5627	1.3134	1.1743	0.86135	1.21952	0.400442
gi|472588489	RHTO_00389	hypothetical protein	5	7	7	1	2	3	3.6001	1.8158	2.371	4.6461	1.0477	1.461	0.803672	0.137749
gi|472588523	RHTO_00423	hypothetical protein	1	0	1	1	0	1	0.6729	NaN	NaN	0.67912	1.3719	1.5244	0.722196	0.0631097
gi|472588558	RHTO_00458	hypothetical protein	1	0	1	1	0	1	0.62103	NaN	NaN	0.87106	NaN	0.45181	1.95426	0.366364
gi|472588620	RHTO_00520	hypothetical protein	1	1	0	1	1	0	0.22039	0.34345	NaN	0.26728	2.73	1.8881	0.925659	0.831408
gi|472583573	RHTO_02077	imidazoleglycerol-phosphate dehydratase	4	6	5	4	6	5	1.068	1.3131	1.6125	1.3163	0.85561	0.79249	1.24595	0.070605
gi|472580737	RHTO_05912	IMP dehydrogenase	18	22	21	18	22	21	1.1269	1.1358	1.5031	1.5194	1.3839	0.75143	0.970243	0.319433
gi|472587013	RHTO_04691	Importin 11	2	2	1	2	2	1	0.70658	0.96109	1.142	0.83822	0.99737	1.2375	0.832809	0.158913
gi|472585381	RHTO_07805	Importin 13	2	1	2	2	1	2	0.77917	1.0954	2.1767	0.96693	0.79293	1.0345	1.02877	0.208379
gi|472588611	RHTO_00511	Importin 9	2	1	5	2	1	5	1.2567	1.4018	0.93206	1.6744	NaN	0.8373	#VALUE!	#VALUE!
gi|472581044	RHTO_05546	importin beta-2 subunit	1	3	4	1	3	4	0.93641	0.94872	1.634	1.2281	1.0129	1.3467	0.888337	0.128907
gi|472581513	RHTO_05194	importin beta-4 subunit	16	15	15	16	15	15	1.1451	1.1511	1.6588	1.5418	1.6542	1.7372	0.586837	0.0154958
gi|472582513	RHTO_03733	importin subunit beta-1	13	15	13	13	15	13	0.75643	0.80752	1.1993	1.0508	1.2443	1.5462	0.695582	0.093747
gi|472583118	RHTO_02388	importin-alpha export receptor	10	10	9	10	10	9	0.9497	1.0131	1.366	1.3503	1.2248	1.1317	0.882203	0.0650425
gi|472583038	RHTO_02648	indigoidine synthase A family protein	3	3	3	3	3	3	0.85932	1.2114	1.3301	1.0926	0.59545	NaN	1.69592	0.0233656
gi|472584586	RHTO_00926	indole-diterpene biosynthesis protein PaxU	0	3	4	0	3	4	NaN	0.44741	0.41094	NaN	0.37112	NaN	2.62074	0.104382
gi|472580784	RHTO_05809	Inner centromere protein, ARK-binding domain protein	1	2	2	1	2	2	0.69654	1.0621	1.4959	0.94084	0.84406	0.77949	1.2982	0.121829
gi|472587547	RHTO_02770	inner nuclear membrane protein MAN1	2	2	1	2	2	1	0.50037	0.90653	0.58033	0.65714	NaN	0.40932	#VALUE!	#VALUE!
gi|472580578	RHTO_06410	inorganic phosphate transporter	7	6	6	7	6	6	0.98692	1.0972	1.1431	1.3548	0.4644	0.69352	2.45296	1.18951
gi|472588277	RHTO_00177	inorganic pyrophosphatase	26	27	24	26	27	24	0.95462	1.0546	1.5854	1.2815	0.94547	1.5341	0.90934	0.223853
gi|472586211	RHTO_06798	inositol metabolism protein Opi10	0	1	1	0	1	1	NaN	0.58616	0.64896	NaN	NaN	NaN	#VALUE!	#VALUE!
gi|472587740	RHTO_02964	inositol or phosphatidylinositol phosphatase	3	1	2	3	1	2	0.80876	1.4787	1.224	0.9957	NaN	NaN	#VALUE!	#VALUE!
gi|472580420	RHTO_06596	inositol/phosphatidylinositol phosphatase	7	14	14	7	14	14	0.31373	0.57732	0.71742	0.37013	0.66496	1.2776	1.14328	0.509918
gi|472580533	RHTO_06468	inositol-3-phosphate synthase	22	21	22	3	3	2	1.612	1.8985	2.0246	2.0349	0.55049	0.61272	1.70259	0.0996266
gi|472584003	RHTO_01679	inositolphosphorylceramide synthase	0	0	1	0	0	1	NaN	NaN	0.87164	NaN	1.142	1.2761	0.837828	0.0481421
gi|472584583	RHTO_00923	integral membrane DUF1751 family protein	2	3	2	2	3	2	0.5622	0.81751	0.87657	0.71619	0.43563	0.33033	3.21279	1.02271
gi|472581810	RHTO_04299	integral membrane protein	0	0	1	0	0	1	NaN	NaN	0.43376	NaN	0.61214	0.64016	2.00039	0.698113
gi|472586270	RHTO_06857	integral membrane protein	0	1	1	0	1	1	NaN	1.0774	0.8253	NaN	NaN	NaN	#VALUE!	#VALUE!
gi|472588184	RHTO_00084	integral membrane protein	1	2	3	1	2	3	1.0295	1.2505	1.1079	1.2964	0.51475	0.5258	1.90342	0.0385157
gi|472588665	RHTO_00565	integral membrane protein	10	4	2	10	4	2	0.41356	0.32075	0.45844	0.55901	0.60337	0.57009	1.72944	0.0634556
gi|472583915	RHTO_01591	integral membrane protein, DUF1295 family protein	4	5	4	4	5	4	0.48826	0.2453	0.36826	0.66784	0.97897	NaN	0.947041	0.105275
gi|472583991	RHTO_01667	integral peroxisomal membrane, peroxin	2	0	1	2	0	1	NaN	NaN	1.8642	NaN	3.1678	NaN	0.582755	0.377707
gi|472587605	RHTO_02827	Integrin alpha N-terminal domain superfamily protein	2	1	0	2	1	0	0.43154	0.5451	NaN	0.52189	1.7127	1.2335	0.697287	0.160392
gi|472588506	RHTO_00406	intra-Golgi transport-related protein	3	1	3	3	1	3	0.83928	2.3471	1.854	1.1318	NaN	0.3504	1.68331	1.65544
gi|472588609	RHTO_00509	intra-Golgi transport-related protein	1	0	0	1	0	0	0.86349	NaN	NaN	1.0865	1.2601	0.82152	0.955474	0.228819
gi|472585321	RHTO_07745	involucrin repeat protein	2	2	0	2	2	0	0.65712	0.98208	NaN	0.93083	1.9337	1.8218	0.532599	0.0158994
gi|472586202	RHTO_06789	iron/copper transporter Atx1	3	2	2	3	2	2	0.79519	0.37811	0.95853	0.88427	1.5285	1.4066	0.722215	0.0742647
gi|472587030	RHTO_04708	iron-containing alcohol dehydrogenase	2	3	3	2	3	3	0.87291	0.79304	1.3329	1.1316	NaN	NaN	#VALUE!	#VALUE!
gi|472586263	RHTO_06850	iron-sulfur cluster assembly protein	1	7	6	1	7	6	1.3299	0.94858	1.6315	1.9872	1.2524	1.457	0.694716	0.0998269
gi|472587346	RHTO_05025	Isochorismatase-like domain containing protein	1	1	2	1	1	2	0.53536	0.49965	1.0313	0.78814	0.33316	0.50076	2.14833	0.78852
gi|472584480	RHTO_01289	isocitrate dehydrogenase (NAD+)	14	20	17	14	20	17	0.69149	0.85544	1.3233	0.87989	1.2964	NaN	0.940733	0.23952
gi|472584481	RHTO_01290	isocitrate dehydrogenase (NAD+)	17	24	20	17	24	20	0.65944	0.73905	1.1677	0.75806	1.902	1.8234	0.557664	0.037386
gi|472581826	RHTO_04315	isocitrate dehydrogenase (NADP+), mitochondrial precursor	26	28	27	26	28	27	1.0427	1.2763	1.6585	1.2654	1.5177	NaN	#VALUE!	#VALUE!
gi|472580898	RHTO_05768	isocitrate lyase	2	2	1	2	2	1	0.55059	0.65716	1.2719	0.74839	1.1961	NaN	#VALUE!	#VALUE!
gi|472582593	RHTO_03507	isocitrate lyase, mitochondrial	7	7	7	4	2	2	0.37874	0.39628	0.66247	0.41575	1.5961	1.9101	0.585643	0.0546798
gi|472581681	RHTO_04405	isoleucyl-trna synthetase	38	31	34	38	31	34	1.0973	1.2846	1.5182	1.4143	0.77251	0.90948	1.30227	0.206752
gi|472581457	RHTO_05138	isopentenyl-diphosphate delta-isomerase	5	5	6	2	3	4	1.2982	1.3568	1.7439	1.5322	0.66624	0.71464	1.55138	0.182576
gi|472585440	RHTO_07865	isovaleryl-CoA dehydrogenase	0	3	1	0	3	1	NaN	0.43498	0.22049	NaN	1.0481	1.3256	0.678978	0.31957
gi|472581557	RHTO_04477	jumonji domain containing protein	1	2	3	1	1	2	0.76577	0.98494	0.83075	1.0631	0.88228	0.2926	1.83862	1.37007
gi|472580302	RHTO_06698	K Homology domain containing protein	5	4	5	5	4	5	0.7518	0.3852	0.67847	0.92322	0.9527	1.1228	0.957647	0.0824006
gi|472581282	RHTO_05398	K Homology domain containing protein	1	4	3	1	4	3	1.1472	0.89869	1.2606	1.3393	1.9306	1.5673	0.578007	0.0848997
gi|472587422	RHTO_05101	K Homology domain containing protein	10	12	14	10	12	14	1.1353	1.1542	1.6244	1.5664	0.8853	0.61397	1.62679	0.496253
gi|472580272	RHTO_06700	karyopherin alpha subunit	11	7	11	11	7	11	0.76188	1.0619	1.2242	0.96827	1.5826	NaN	#VALUE!	#VALUE!
gi|472584929	RHTO_00783	Kelch repeat containing protein	3	4	3	3	4	3	1.5248	1.6417	1.3004	2.0477	1.3936	4.0026	0.980099	0.891023
gi|472586192	RHTO_06779	Kelch repeat containing protein	5	7	7	3	5	5	0.73326	0.77569	1.0185	1.0615	0.50892	0.5586	1.8691	0.0886005
gi|472582722	RHTO_03312	Kelch-type beta propeller domain containing protein	2	1	3	0	0	1	0.51667	1.9181	0.85345	0.61044	0.99034	1.1741	0.967127	0.10108
gi|472586889	RHTO_04566	ketol-acid reductoisomerase (partial sequence c terminus)	19	20	18	1	0	1	1.1875	NaN	1.8338	1.7437	1.9094	1.5409	0.638014	0.109223
gi|472580712	RHTO_05887	kinesin family member 1/13/14	1	3	3	1	3	3	0.90735	0.7302	1.1336	1.1522	NaN	1.1989	#VALUE!	#VALUE!
gi|472581678	RHTO_04402	kinesin family member 5	7	7	8	7	7	8	0.68348	0.88757	1.0455	0.90332	0.12099	NaN	4.8291	4.85931
gi|472586702	RHTO_06225	kinetochore protein Mis12/MTW1	3	3	2	3	3	2	0.61397	0.77346	0.13218	0.76819	1.0451	1.1165	1.04072	0.200616
gi|472586801	RHTO_06324	kinetochore protein NDC80	1	1	0	1	1	0	NaN	0.6806	NaN	NaN	1.032	0.615	1.49453	0.473682
gi|472588275	RHTO_00175	kinetochore protein Nuf2	2	3	4	2	3	4	0.40255	0.61054	1.199	0.52827	0.66027	0.71272	1.56219	0.187547
gi|472581245	RHTO_05361	kinetochore protein Spc25	3	4	1	3	4	1	0.50292	0.52741	0.56627	0.60725	0.97353	0.85074	0.986546	0.212163
gi|472583000	RHTO_02610	KRR1 interacting protein 1	4	3	4	4	3	4	0.91231	0.87078	1.2795	1.1149	0.8879	0.87149	1.13978	0.0117488
gi|472583591	RHTO_02095	kynureninase	2	1	0	2	1	0	0.81886	1.0475	NaN	0.95593	1.0288	0.93735	1.10451	0.154814
gi|472581975	RHTO_04218	kynurenine 3-monooxygenase	5	5	4	5	5	4	0.81462	0.9651	1.2073	0.98811	NaN	NaN	#VALUE!	#VALUE!
gi|472581276	RHTO_05392	kynurenine formamidase	1	1	1	1	1	1	0.50154	0.66273	0.91916	0.626	1.1366	0.78874	1.07383	0.274377
gi|472584448	RHTO_01257	kynurenine formamidase	0	1	0	0	1	0	NaN	0.79159	NaN	NaN	0.28322	NaN	3.62015	0.126325
gi|472587131	RHTO_04809	kynurenine/2-aminoadipate aminotransferase	3	4	3	3	4	3	0.96734	1.1521	2.1188	1.1789	NaN	NaN	#VALUE!	#VALUE!
gi|472584096	RHTO_01349	lactam utilization protein LamB	2	1	0	2	1	0	0.64041	0.23652	NaN	0.85875	2.5631	13.543	0.207806	0.163612
gi|472586766	RHTO_06289	lactoylglutathione lyase	4	4	3	4	4	3	0.54659	0.48026	1.1719	0.69977	0.52432	0.53392	1.40176	0.845975
gi|472584241	RHTO_01494	L-aminoadipate-semialdehyde dehydrogenase	21	31	30	4	5	6	1.1197	1.4618	1.7054	1.402	0.55681	0.6349	1.67215	0.112839
gi|472581949	RHTO_04192	lanosterol synthase	1	1	2	1	1	2	0.49896	1.039	0.91285	0.60753	0.74444	0.95092	1.06231	0.275793
gi|472584687	RHTO_01027	L-aspartate:2-oxoglutarate aminotransferase	23	28	30	0	1	1	0.97854	1.2217	1.7449	1.2793	0.67131	0.73491	1.40197	0.0759577
gi|472587843	RHTO_03067	late embryogenesis abundant protein, group 2 domain protein	1	0	2	1	0	2	0.4067	NaN	0.49783	0.5899	0.85679	0.6719	1.18082	0.300893
gi|472581732	RHTO_04456	late endosome to vacuole transport-related protein	1	2	2	0	0	1	0.43306	2.4836	1.921	0.53162	1.4011	1.2245	0.75907	0.0525485
gi|472581247	RHTO_05363	late secretory pathway protein AVL9 family protein	5	4	3	5	4	3	0.60443	0.68104	0.84148	0.76496	1.8216	1.5185	0.608012	0.0552819
gi|472581064	RHTO_05566	lectin, mannose-binding 2	1	2	1	1	2	1	0.93596	1.2801	0.79033	1.1664	1.4039	1.3788	0.71019	0.0162371
gi|472586126	RHTO_06713	Legume-like lectin	2	3	4	2	3	4	1.1807	0.92442	1.2802	1.4541	1.8541	1.4878	0.605577	0.0663946
gi|472585811	RHTO_07087	LEM3/CDC50 family protein	2	3	4	2	3	4	0.83639	0.71762	1.0772	1.1648	0.87234	1.1279	1.04965	0.142016
gi|472586748	RHTO_06271	leucine rich repeat domain containing protein	0	0	1	0	0	1	NaN	NaN	0.83551	NaN	1.2375	1.1732	0.801333	0.0547228
gi|472581743	RHTO_04467	leucine-rich repeat containing protein 68	3	4	6	3	4	6	0.74273	0.92482	1.3487	1.0693	1.3145	0.98417	0.888415	0.180552
gi|472580542	RHTO_06477	leucine-trna ligase	40	41	38	7	8	7	1.3251	1.4298	1.7908	1.7231	1.4658	1.4761	0.809037	0.223787
gi|472583384	RHTO_02331	leucyl aminopeptidase	14	14	22	14	14	22	1.0719	1.0802	1.7399	1.5715	1.7353	1.8578	0.580225	0.0440653
gi|472585748	RHTO_07641	leukotriene-A4 hydrolase	7	9	10	7	9	10	0.77217	1.0551	1.1154	1.0565	2.5138	1.9373	0.514293	0.115555
gi|472586164	RHTO_06751	lipase 2	2	3	0	2	3	0	0.43677	0.5316	NaN	0.58396	1.4523	1.0146	0.830456	0.148967
gi|472584136	RHTO_01389	lipase, class 3	4	2	3	1	1	0	0.34013	0.35289	NaN	0.39263	0.62645	0.75482	1.46056	0.191964
gi|472583174	RHTO_02444	Lipid-binding START containing protein	1	0	1	1	0	1	NaN	NaN	0.41167	NaN	1.7991	0.81541	1.19842	0.629069
gi|472587215	RHTO_04894	lipin 1	2	3	2	2	3	2	0.20071	0.36592	0.71215	0.2657	0.71039	0.93526	1.26882	0.177215
gi|472582657	RHTO_03571	lipoic acid synthetase	3	4	4	1	2	2	0.74521	0.83553	1.5485	0.98184	1.1518	1.2688	0.828176	0.056611
gi|472581301	RHTO_05417	lipoyl(octanoyl) transferase	3	0	0	3	0	0	2.2789	NaN	NaN	2.9244	0.85147	0.81357	1.2018	0.0386865
gi|472584754	RHTO_01094	LisH dimerisation motif containing protein (partial sequence c terminus)	1	0	1	1	0	1	NaN	NaN	NaN	NaN	1.5623	1.8395	0.665484	0.136345
gi|472582995	RHTO_02605	L-lactate dehydrogenase (cytochrome)	0	1	1	0	1	1	NaN	0.50833	1.2875	NaN	0.69901	0.71419	1.25614	0.276245
gi|472582525	RHTO_03745	L-malate dehydrogenase	19	22	23	19	22	23	0.44737	0.55396	0.62178	0.60272	1.5626	1.1592	0.860434	0.219368
gi|472581873	RHTO_04363	L-malate dehydrogenase, mitochondrial	28	32	30	28	32	30	0.87067	0.97865	1.3568	1.1707	0.88424	0.7498	1.21986	0.103653
gi|472586292	RHTO_06879	long chain fatty alcohol oxidase	4	2	4	0	1	2	0.17702	0.38258	0.34651	0.23172	NaN	NaN	#VALUE!	#VALUE!
gi|472581860	RHTO_04350	long-chain acyl-CoA synthetase	6	5	5	6	5	5	0.27209	0.56293	0.72689	0.35645	1.5582	0.70758	1.15847	0.447492
gi|472584383	RHTO_01192	long-chain acyl-CoA synthetase	1	0	0	1	0	0	1.951	NaN	NaN	2.2692	0.26659	0.12976	5.16075	2.20895
gi|472587278	RHTO_04957	long-chain acyl-CoA synthetase	11	9	9	7	7	5	0.39148	0.43323	0.50444	0.53599	2.4648	9.3965	0.403081	0.295351
gi|472588158	RHTO_00058	long-chain acyl-CoA synthetase	14	11	13	14	11	13	0.46819	0.46173	0.5541	0.56279	1.9227	2.5651	0.407941	0.104298
gi|472583855	RHTO_01531	longevity-assurance protein	1	1	0	1	1	0	0.78058	0.81523	NaN	1.146	NaN	NaN	#VALUE!	#VALUE!
gi|472587566	RHTO_02789	longevity-assurance protein	1	1	1	1	1	1	1.0389	3.2971	NaN	1.1767	0.38785	0.50594	1.8066	0.869216
gi|472581155	RHTO_05472	L-ornithine N5-oxygenase	0	2	1	0	2	1	NaN	1.5616	1.3881	NaN	NaN	0.89459	#VALUE!	#VALUE!
gi|472582855	RHTO_03445	low affinity iron permease, Fet4	1	0	2	1	0	2	1.53	NaN	0.40088	1.9503	NaN	NaN	#VALUE!	#VALUE!
gi|472584553	RHTO_00893	low temperature viability protein	3	5	3	3	5	3	0.95085	0.97489	1.0068	1.1688	0.28705	0.21597	4.09419	0.576888
gi|472585725	RHTO_07618	L-pipecolate oxidase	1	2	3	1	2	3	1.3974	1.6542	1.6721	1.8806	1.0944	0.8055	1.0776	0.231735
gi|472581926	RHTO_04169	L-serine dehydratase	2	2	2	2	2	2	0.96301	1.275	1.5509	1.2477	2.1402	1.2167	0.638543	0.177632
gi|472584824	RHTO_00678	L-serine dehydratase	1	0	0	1	0	0	0.3641	NaN	NaN	0.53756	0.5257	NaN	2.12301	0.312231
gi|472588334	RHTO_00234	lupus La protein	22	25	22	22	25	22	1.1874	1.0991	1.7019	1.6685	1.0353	0.69936	1.19789	0.32808
gi|472588473	RHTO_00373	L-xylulose reductase	2	4	3	2	4	3	0.54806	0.28902	0.54582	0.69134	NaN	0.23294	4.80874	0.729437
gi|472588145	RHTO_00045	lysine methyltransferase	2	2	0	2	2	0	0.67671	1.2296	NaN	0.90082	0.4375	0.33206	2.64697	0.362906
gi|472586512	RHTO_06035	lysine-trna ligase	19	22	22	19	22	22	1.2867	1.6448	2.0346	1.67	NaN	1.0023	#VALUE!	#VALUE!
gi|472580710	RHTO_05885	lysophosphatidic acid acyltransferase / lysophosphatidylinositol acyltransferase	0	1	0	0	1	0	NaN	1.4391	NaN	NaN	NaN	NaN	#VALUE!	#VALUE!
gi|472581430	RHTO_05332	lysophospholipid acyltransferase	0	2	0	0	2	0	NaN	0.95594	NaN	NaN	2.1116	1.9849	0.486567	0.0155551
gi|472584661	RHTO_01001	lysophospholipid hydrolase	2	1	3	2	1	3	1.2533	1.5327	1.9294	1.6478	0.95554	0.84478	0.975001	0.252228
gi|472587398	RHTO_05077	M protein repeat protein	13	7	9	13	7	9	0.49413	0.65463	1.0046	0.66102	0.7221	0.74281	1.43686	0.125015
gi|472587862	RHTO_03086	macro domain containing protein	3	4	4	3	4	4	0.42655	0.57684	0.71815	0.57017	0.92652	0.88143	1.28326	0.306677
gi|472580970	RHTO_05661	macrofage activating glycoprotein	2	3	4	2	3	4	2.6094	0.84921	1.3596	3.0446	1.8591	1.7988	0.539182	0.0161393
[truncated: 1,546 more rows]
