# Supplementary material for: Regulation of autophagy and lipid accumulation under phosphate limitation in Rhodotorula toruloides
Source: Front Microbiol. 2023 Jan 26;13:1046114. doi: 10.3389/fmicb.2022.1046114 (PMC9908577; doi:10.3389/fmicb.2022.1046114)
Supplement: Supplementary file 6 [file Table_3.xls]

## Sheet: Sheet1
Table S3. Differentially expressed phosphoproteins between "P0" and "F3"
Note: #DIV/0!: not detectable.
Proteins ID		Positions within proteins	Fasta headers	Localization prob	Score diff	Amino acid	Modified sequence	Ratio P0/F3 Experiment1	Ratio P0/F3 Experiment2	Ratio P0/F3 Experiment3	Average	CV (%)
Autophagy-related (Atg) proteins
gi|472580579	RHTO_06411	307	autophagy-related protein 9	0.751122	5.03497	S	_AVS(ph)PSTASSSSHR_	#DIV/0!	5.43951	4.25985	4.84968	17.2
gi|472583113	RHTO_02383	553	autophagy-related protein 13	0.985378	20.7424	S	_AS(ph)PSSVPR_	#DIV/0!	2.50545	2.03405	2.26975	14.6857
Ribosomome protein
gi|472586228	RHTO_06815	290	40S ribosomal protein s1	0.815681	8.3995	T	_LLELHSSST(ph)EEEVGQK_	#DIV/0!	0.73078	0.251313	0.491047	69.0432
gi|472583563	RHTO_02067	24	40S ribosomal protein s4	0.999999	61.3567	S	_LGGAYAPKPS(ph)PGPHK_	#DIV/0!	0.523314	0.782718	0.653016	28.0891
gi|472587528	RHTO_02750	98	60S acidic ribosomal protein p1	1	114.554	S	_EEEKEES(ph)DDDM(ox)GFGLFD_	5.04083	2.1836	1.33092	2.85178	68.137
gi|472583286	RHTO_02175	100	60S acidic ribosomal protein p2	1	116.699	S	_AEDKPAEKEEES(ph)DDDM(ox)GFGLFD_	2.80505	3.55834	1.88523	2.74954	30.4755
gi|472581449	RHTO_05130	143	40S ribosomal protein s19	1	78.8403	S	_IATAVLEEQRS(ph)ENDDEES(ph)A_	0.780762	#DIV/0!	0.618774	0.699768	16.3687
gi|472586228	RHTO_06815	289	40S ribosomal protein s1	0.851139	7.75358	S	_LLELHSSS(ph)TEEEVGQK_	0.587027	0.553312	0.465246	0.535195	11.7488
gi|472586228	RHTO_06815	310	40S ribosomal protein s1	1	89.0128	S	_DFKEPDVLAS(ph)V_	0.535963	0.346536	0.468274	0.450258	21.3189
gi|472581449	RHTO_05130	150	40S ribosomal protein s19	1	143.216	S	_IATAVLEEQRS(ph)ENDDEES(ph)A_	0.535934	0.401881	0.439889	0.459235	15.0444
gi|472583326	RHTO_02232	303	60S acidic ribosomal protein p0	1	79.4307	S	_ASEEKAPAEEEES(ph)DDDM(ox)GFGLFD_	0.486713	0.506842	0.348566	0.447374	19.2591
gi|472586228	RHTO_06815	288	40S ribosomal protein s1	0.996299	25.3886	S	_LLELHSS(ph)STEEEVGQK_	0.450369	0.631154	0.656297	0.579273	19.3932
gi|472585347	RHTO_07771	38	60S ribosomal protein l12	1	74.9442	S	_IGPLGLS(ph)PK_	0.359919	0.149595	0.191876	0.233797	47.585
gi|472583213	RHTO_02483	27	40S ribosomal protein s27	0.999615	34.164	S	_LVQS(ph)PNSYFM(ox)DVK_	0.333156	0.508492	0.311711	0.384453	28.0801
gi|472586228	RHTO_06815	287	40S ribosomal protein s1	0.991478	21.4602	S	_LLELHS(ph)S(ph)STEEEVGQK_	0.305698	0.24593	0.227687	0.259772	15.7085
gi|472581973	RHTO_04216	15	40S ribosomal protein s14	0.999611	34.1024	S	_TTTS(ph)LGPNVK_	0.292048	0.197582	0.19668	0.22877	23.9551
gi|472582418	RHTO_03637	159	40S ribosomal protein s9	0.883831	8.82881	T	_HIDFALT(ph)SPYGGGR_	0.263116	0.320914	#DIV/0!	0.292015	13.9955
gi|472582418	RHTO_03637	160	40S ribosomal protein s9	0.906838	9.88319	S	_HIDFALTS(ph)PYGGGR_	0.263116	#DIV/0!	0.231198	0.247157	9.13176
gi|472586726	RHTO_06249	102	40S ribosomal protein s17	0.999998	59.1478	S	_KDNYVPEVSALDS(ph)QGEPLEVDPDTKDLLK_	0.239406	0.313607	0.394882	0.315965	24.6118
gi|472587936	RHTO_03161	4	60S ribosomal protein l22	1	81.6249	S	_APS(ph)VVGLKK_	0.223609	0.151699	0.164023	0.179777	21.3911
gi|472585443	RHTO_07868	372	60S ribosomal protein l2	1	76.0359	S	_GFKETLLS(ph)A_	0.190723	0.107757	0.197746	0.165409	30.2589
gi|472587332	RHTO_05011	32	40S ribosomal protein s3	0.99921	31.0278	S	_TLS(ph)SEGYSGCEVR_	0.188249	0.136934	0.135481	0.153555	19.573
gi|472586228	RHTO_06815	290	40S ribosomal protein s1	0.815681	8.3995	T	_LLELHSSST(ph)EEEVGQK_	#DIV/0!	0.73078	0.251313	0.491047	69.0432
gi|472581449	RHTO_05130	123	40S ribosomal protein s19	1	92.8661	S	_RIS(ph)VDGQR_	0.0617627	#DIV/0!	0.0867754	0.0742691	23.8143
gi|472586399	RHTO_06986	44	ribosomal rna-processing protein 14, RRP14	0.999998	56.1018	S	_YYIRPES(ph)DDEDETPK_	1.18053	0.230899	0.273358	0.561594	95.5192
gi|472582228	RHTO_03968	264	large subunit ribosomal protein L7Ae	1	79.0275	S	_DIASVDKS(ph)L_	0.469528	0.418078	0.450471	0.446025	5.83183
gi|472588553	RHTO_00453	50	ribosomal biogenesis protein Gar2	1	88.9943	T	_VVESAADEDAPET(ph)PAKGANKK_	0.166459	0.0622665	0.103877	0.110867	47.3058
gi|472586916	RHTO_04593	14	large subunit ribosomal protein L31e	0.999623	34.2328	S	_S(ph)ALTDVVAR_	0.439116	0.345566	0.184778	0.323154	39.8083
gi|472582228	RHTO_03968	260	large subunit ribosomal protein L7Ae	0.99995	43.0367	S	_DIAS(ph)VDKSL_	0.37372	0.291945	0.332226	0.33263	12.2926
Kinase
gi|472587362	RHTO_05041	640	cellular morphogenesis-related protein	0.762574	5.27099	S	_VQTPGGASTAPSGS(ph)PTHSTVNR_	#DIV/0!	2.60926	2.40061	2.50494	5.88983
gi|472580365	RHTO_06620	241	[3-methyl-2-oxobutanoate dehydrogenase (acetyl-transferring)] kinase	0.815151	5.60402	S	_IEPSARPPSS(ph)S(ph)LSASR_	#DIV/0!	0.793273	0.410105	0.601689	45.03
gi|472583857	RHTO_01533	1366	two-component system, chemotaxis family, sensor kinase Cph1	0.854106	6.73787	T	_GGGEPTS(ph)SPLSSPT(ph)LAK_	#DIV/0!	0.74228	0.963577	0.852929	18.3462
gi|472583132	RHTO_02402	174	cAMP-dependent protein kinase regulatory subunit	0.827056	6.87347	S	_NAGKAPGSTTPPDADS(ph)SPSNTQR_	#DIV/0!	0.726427	0.69185	0.709139	3.44783
gi|472580749	RHTO_05924	332	AMP-activated protein kinase beta subunit, carbohydrate-Binding Module Family 48 protein, glycogen-binding	0.836329	7.37377	T	_RELQPSSSSVDGGSGSAGSST(ph)PSR_	#DIV/0!	0.251876	0.18595	0.218913	21.2949
gi|472581963	RHTO_04206	558	p21-activated kinase 1	0.866533	8.12482	S	_LGAEGPGSLPTS(ph)PDR_	#DIV/0!	0.691085	1.11407	0.902577	33.1379
gi|472585460	RHTO_07885	257	serine/threonine protein kinase FSK	0.822999	9.68455	S	_TGTPAPAPAPASTS(ph)PK_	#DIV/0!	1.21362	1.39944	1.30653	10.0568
gi|472586549	RHTO_06072	9	hexokinase	0.893128	10.4766	S	_RTS(ph)TAAEAR_	#DIV/0!	0.164544	0.234313	0.199428	24.7377
gi|472580497	RHTO_06518	682	protein serine/threonine kinase	0.966643	15.1462	S	_SSFDFDNPDPDDSS(ph)LSR_	#DIV/0!	0.600998	0.575341	0.588169	3.0845
gi|472580497	RHTO_06518	411	protein serine/threonine kinase	0.991025	20.4306	S	_TTTDEEPFLDSAPNS(ph)PR_	#DIV/0!	0.449135	1.00829	0.728712	54.2575
gi|472581376	RHTO_05278	40	choline kinase	0.99086	21.5152	S	_RS(ph)STDS(ph)FSLEHNR_	#DIV/0!	1.23402	0.980969	1.10749	16.1566
gi|472581963	RHTO_04206	554	p21-activated kinase 1	0.996245	23.3892	S	_LGAEGPGS(ph)LPTS(ph)PDRR_	#DIV/0!	1.17389	1.13363	1.15376	2.46714
gi|472582860	RHTO_03450	619	3-phosphoinositide dependent protein kinase-1	0.996734	24.8463	S	_S(ph)FVGTPEYVSPEILSEGR_	#DIV/0!	2.02102	1.54469	1.78285	18.892
gi|472587595	RHTO_02818	145	6-phosphofructo-2-kinase / fructose-2,6-bisphosphatase	0.997149	25.4923	S	_ASSTVTS(ph)PVQS(ph)PR_	#DIV/0!	0.690369	1.50841	1.09939	52.6148
gi|472587009	RHTO_04687	2645	serine/threonine protein kinase RIM15	0.997944	26.8602	S	_RNS(ph)LPSR_	#DIV/0!	1.72426	1.26164	1.49295	21.911
gi|472585472	RHTO_07897	1630	histidine kinase	0.999272	31.9182	S	_RRPS(ph)HPSYGDGS(ph)E_	#DIV/0!	0.538764	0.784375	0.66157	26.2517
gi|472587445	RHTO_02667	259	serine/threonine protein kinase	0.999216	32.0782	S	_GRGGS(ph)IGSTAGAR_	#DIV/0!	0.399313	0.893096	0.646205	54.032
gi|472585391	RHTO_07815	263	cyclin-dependent protein kinase	0.99942	32.5485	S	_YRS(ph)PS(ph)PDYSRS(ph)PR_	#DIV/0!	0.99453	0.977899	0.986215	1.1924
gi|472583132	RHTO_02402	123	cAMP-dependent protein kinase regulatory subunit	0.999551	33.6956	S	_GSASAGEQS(ph)PFSEYPPEGGPLVR_	#DIV/0!	1.92385	1.01686	1.47036	43.6181
gi|472583288	RHTO_02231	745	histidine kinase	0.999241	34.6749	S	_KSS(ph)PTTLSDK_	#DIV/0!	16.1413	3.25701	9.69914	93.9315
gi|472587462	RHTO_02684	648	serine/threonine protein kinase PRP4	0.99977	36.3971	Y	_VSDLGSASDVTENDITPY(ph)LVSR_	#DIV/0!	0.903424	1.07336	0.988394	12.1577
gi|472585472	RHTO_07897	312	histidine kinase	0.999776	36.4952	S	_RGS(ph)NASLAASR_	#DIV/0!	0.245996	0.246409	0.246203	0.118382
gi|472585391	RHTO_07815	257	cyclin-dependent protein kinase	0.9998	37.0622	S	_YRS(ph)PS(ph)PDYSRS(ph)PR_	#DIV/0!	1.01218	1.01968	1.01593	0.522248
gi|472587433	RHTO_05112	266	serine/threonine protein kinase	1	72.1687	S	_AAGEIEAGASQIS(ph)PR_	#DIV/0!	0.307834	0.467421	0.387628	29.1116
gi|472588318	RHTO_00218	601	calcium/calmodulin-dependent protein kinase kinase	1	74.5662	S	_RKS(ph)EAALAGSSSTDSVEADTK_	#DIV/0!	0.755344	0.707814	0.731579	4.59398
gi|472588067	RHTO_03292	122	nucleoside-diphosphate kinase	0.999999	60.9475	S	_NVCHGSDAVES(ph)AKK_	15.9198	3.87327	#DIV/0!	9.89652	86.0723
gi|472582208	RHTO_03948	654	inositol-hexakisphosphate kinase	0.999995	53.5354	S	_RHS(ph)S(ph)PAGTGVSSPAR_	10.0649	2.12175	4.92756	5.70474	70.6117
gi|472582208	RHTO_03948	653	inositol-hexakisphosphate kinase	0.999996	54.5823	S	_RHS(ph)S(ph)PAGTGVSSPAR_	10.0649	6.81292	4.92756	7.26847	35.7544
gi|472580941	RHTO_05632	342	protein serine/threonine kinase	0.897507	9.36198	S	_GTSQPGT(ph)PS(ph)GARTPVEK_	7.81006	#DIV/0!	4.56371	6.18688	37.1029
gi|472583132	RHTO_02402	63	cAMP-dependent protein kinase regulatory subunit	1	152.163	T	_EAT(ph)PPLNAAGR_	7.6929	5.12715	3.05998	5.29334	43.8462
gi|472583857	RHTO_01533	271	two-component system, chemotaxis family, sensor kinase Cph1	0.984681	21.329	S	_TEGAASSIES(ph)PAAS(ph)DVKPPS(ph)LDPYLSAPTTHAK_	5.73625	#DIV/0!	0.690799	3.21352	111.021
gi|472582208	RHTO_03948	407	inositol-hexakisphosphate kinase	0.998682	28.7996	S	_SNTPSHS(ph)PPLGR_	5.72705	3.00842	2.49788	3.74445	46.3581
gi|472580941	RHTO_05632	346	protein serine/threonine kinase	0.968891	14.9719	T	_GTSQPGTPSGART(ph)PVEK_	5.63571	4.47147	#DIV/0!	5.05359	16.2902
gi|472585240	RHTO_08159	314	SFRS protein kinase	0.995503	26.2683	S	_IS(ph)DSGGSYVGS(ph)IKK_	5.51785	3.87057	3.83568	4.40803	21.8077
gi|472583857	RHTO_01533	1443	two-component system, chemotaxis family, sensor kinase Cph1	0.868854	9.29167	S	_AGTAS(ph)PTHVSEYR_	5.47315	2.24437	2.48441	3.40064	52.8975
gi|472586790	RHTO_06313	356	protein kinase Yak1	0.994345	22.5158	S	_QAM(ox)LPTAPS(ph)PSR_	4.91642	2.30023	2.12269	3.11311	50.2465
gi|472588067	RHTO_03292	91	nucleoside-diphosphate kinase	1	75.3266	T	_TILGAT(ph)NPLASAPGTIR_	4.83279	5.00726	3.4125	4.41752	19.8013
gi|472586790	RHTO_06313	923	protein kinase Yak1	0.998916	29.6433	S	_GGAPS(ph)PTEVAAAK_	4.64554	5.36538	3.38272	4.46455	22.4804
gi|472586288	RHTO_06875	95	glycogen synthase kinase 3 beta	0.999698	37.178	T	_NRPPPLAAALVT(ph)PTSS(ph)PVPDAHAAR_	4.43341	2.88784	3.27912	3.53346	22.7416
gi|472586288	RHTO_06875	99	glycogen synthase kinase 3 beta	0.998181	28.2437	S	_NRPPPLAAALVT(ph)PTSS(ph)PVPDAHAAR_	4.22119	2.88784	4.15282	3.75395	20.0017
gi|472586021	RHTO_07297	907	mitogen-activated protein kinase kinase kinase	0.999092	32.1993	S	_RQNS(ph)APGSATSASGSVTGGGDKR_	3.96134	2.83511	2.1254	2.97395	31.1307
gi|472581963	RHTO_04206	565	p21-activated kinase 1	0.999999	60.8424	S	_RAPS(ph)PGEALYR_	3.88123	1.81196	1.55924	2.41747	52.6969
gi|472588594	RHTO_00494	48	6-phosphofructokinase	1	76.3608	T	_SPHLSGAET(ph)PPPFAFQS(ph)PGES(ph)QPQT(ph)PGKRR_	3.75361	2.00614	1.79363	2.51779	42.7165
gi|472588594	RHTO_00494	44	6-phosphofructokinase	1	73.1521	S	_SPHLSGAET(ph)PPPFAFQS(ph)PGES(ph)QPQT(ph)PGKRR_	3.62621	1.88327	3.04785	2.85245	31.1223
gi|472580941	RHTO_05632	783	protein serine/threonine kinase	0.999762	36.2313	S	_LAPSS(ph)PAGR_	3.61507	2.20439	2.34252	2.72066	28.5832
gi|472580941	RHTO_05632	169	protein serine/threonine kinase	1	85.6659	S	_S(ph)IEEPLPADHEPEHGPPDYTR_	3.38604	2.76893	1.98851	2.71449	25.8006
gi|472587595	RHTO_02818	657	6-phosphofructo-2-kinase / fructose-2,6-bisphosphatase	0.999931	41.0957	S	_DLGVLSPS(ph)TTRPPS(ph)RER_	3.24338	2.05267	#DIV/0!	2.64803	31.7958
gi|472585460	RHTO_07885	136	serine/threonine protein kinase FSK	0.999666	35.3042	S	_ELGNLSLAATPS(ph)PPLGSEDGHDGAPR_	3.15298	1.9006	1.44642	2.16667	40.7928
gi|472587462	RHTO_02684	255	serine/threonine protein kinase PRP4	0.999996	56.7191	S	_YASTNPSAAAS(ph)PAGGAT(ph)PDIKR_	3.08185	0.669703	0.646454	1.466	95.4579
gi|472583288	RHTO_02231	748	histidine kinase	0.81865	6.45726	T	_KSS(ph)PTT(ph)LS(ph)DKSPDTTPGSDSSVHNEFR_	3.0498	2.53171	2.37265	2.65139	13.3547
gi|472583132	RHTO_02402	212	cAMP-dependent protein kinase regulatory subunit	0.99318	25.5635	T	_SASTAHT(ph)ES(ph)DEEVEDPRDDPNYHPGR_	2.97823	#DIV/0!	1.85052	2.41437	33.0278
gi|472583132	RHTO_02402	214	cAMP-dependent protein kinase regulatory subunit	0.998676	33.756	S	_SASTAHT(ph)ES(ph)DEEVEDPRDDPNYHPGR_	2.97823	#DIV/0!	1.85052	2.41437	33.0278
gi|472587445	RHTO_02667	185	serine/threonine protein kinase	0.999999	60.0451	S	_ALS(ph)PPPNPPSR_	2.93513	1.57776	1.89869	2.13719	33.1941
gi|472583132	RHTO_02402	168	cAMP-dependent protein kinase regulatory subunit	0.960416	16.8601	T	_NAGKAPGSTT(ph)PPDADSSPSNTQR_	2.90487	2.34813	1.32254	2.19185	36.6201
gi|472583288	RHTO_02231	750	histidine kinase	0.988445	23.2003	S	_KS(ph)SPTT(ph)LS(ph)DKSPDTTPGSDSSVHNEFR_	2.85861	2.53171	1.95305	2.44779	18.7344
gi|472585460	RHTO_07885	141	serine/threonine protein kinase FSK	0.999999	62.5091	S	_ELGNLSLAATPS(ph)PPLGS(ph)EDGHDGAPR_	2.70607	2.09613	1.16368	1.98863	39.0617
gi|472585391	RHTO_07815	255	cyclin-dependent protein kinase	0.999487	32.934	S	_YRS(ph)PS(ph)PDYSRS(ph)PR_	2.69295	1.16137	1.11238	1.65557	54.2854
gi|472587009	RHTO_04687	1889	serine/threonine protein kinase RIM15	0.997644	26.2676	S	_LLS(ph)PNSENNLAAVM(ox)R_	2.6733	2.51655	1.34653	2.17879	33.2757
gi|472582083	RHTO_04077	91	protein kinase IKS1	0.99999	52.3994	S	_AVS(ph)PLREPASPSLST(ph)VSDATDDVR_	2.6718	0.947598	2.25887	1.95942	45.9452
gi|472580525	RHTO_06460	371	histidine kinase	0.998843	29.3921	S	_LPVNEIDAGSSDIS(ph)PR_	2.64915	3.41332	1.44011	2.50086	39.7834
gi|472585240	RHTO_08159	316	SFRS protein kinase	0.998388	28.2737	S	_ISDS(ph)GGSYVGS(ph)IKK_	2.61267	0.898796	1.32682	1.61276	55.3088
gi|472583288	RHTO_02231	779	histidine kinase	0.833433	7.20233	S	_SS(ph)DPTLDSIDEGSLAPARPR_	2.57102	#DIV/0!	1.83321	2.20212	23.6913
gi|472587595	RHTO_02818	144	6-phosphofructo-2-kinase / fructose-2,6-bisphosphatase	0.981062	17.1751	T	_AS(ph)STVT(ph)SPVQSPR_	2.54453	1.02267	1.09517	1.55412	55.2389
gi|472586021	RHTO_07297	1263	mitogen-activated protein kinase kinase kinase	1	82.8805	S	_EISDEDPENFS(ph)YK_	2.41984	1.1698	1.72408	1.77124	35.3626
gi|472583857	RHTO_01533	105	two-component system, chemotaxis family, sensor kinase Cph1	0.983479	18.1482	S	_GFPS(ph)PDVTSPSGR_	2.39762	1.3326	2.43374	2.05466	30.4467
gi|472588587	RHTO_00487	225	AGC/YANK protein kinase	0.99938	32.091	S	_TNS(ph)TLTQAILK_	2.38703	2.38755	1.77987	2.18482	16.0515
gi|472588357	RHTO_00257	259	calcium/calmodulin-dependent protein kinase kinase	1	77.0524	S	_RGS(ph)S(ph)PAALTGIDPANAPK_	2.31777	2.67752	0.909587	1.96829	47.4697
gi|472588357	RHTO_00257	1354	calcium/calmodulin-dependent protein kinase kinase	0.999997	54.7775	S	_GVSLDPPS(ph)PR_	2.31187	1.23586	#DIV/0!	1.77387	42.8922
gi|472583132	RHTO_02402	175	cAMP-dependent protein kinase regulatory subunit	0.897727	11.0971	S	_NAGKAPGSTTPPDADSS(ph)PSNTQR_	2.2686	0.613685	0.636497	1.17293	80.9044
gi|472588594	RHTO_00494	40	6-phosphofructokinase	0.999999	61.8935	S	_SPHLSGAET(ph)PPPFAFQS(ph)PGES(ph)QPQT(ph)PGKRR_	2.25581	1.7773	1.80398	1.9457	13.82
gi|472588318	RHTO_00218	26	calcium/calmodulin-dependent protein kinase kinase	0.997056	25.2989	S	_SPS(ph)PPPPVLTSDQQHK_	2.22732	2.55167	#DIV/0!	2.3895	9.59829
gi|472587595	RHTO_02818	149	6-phosphofructo-2-kinase / fructose-2,6-bisphosphatase	0.999997	55.9928	S	_ASSTVTS(ph)PVQS(ph)PR_	2.11251	0.690369	1.2853	1.36273	52.4116
gi|472586149	RHTO_06736	613	mitogen-activated protein kinase kinase kinase	0.987931	22.1985	S	_GAS(ph)PTSPNYLGIEIPR_	2.10168	#DIV/0!	2.04136	2.07152	2.05905
gi|472588367	RHTO_00267	225	dual-specificity tyrosine-(Y)-phosphorylation regulated kinase	0.999999	61.2747	S	_SPVASAVEVQQDRGPSSATSASQQDIS(ph)PR_	2.04198	1.88651	1.90909	1.94586	4.31723
gi|472587445	RHTO_02667	447	serine/threonine protein kinase	0.964484	14.3387	S	_TAS(ph)RDAGADGGLVALK_	2.03083	0.754432	#DIV/0!	1.39263	64.8089
gi|472588447	RHTO_00347	361	mitogen-activated protein kinase Maf1	0.987595	21.432	S	_SHS(ph)ASS(ph)VASISLNK_	1.98016	2.37113	2.80986	2.38705	17.3888
gi|472588447	RHTO_00347	358	mitogen-activated protein kinase Maf1	0.999752	36.8067	S	_SHS(ph)ASS(ph)VASISLNK_	1.98016	2.37113	2.79791	2.38307	17.163
gi|472580220	RHTO_07391	240	serine/threonine protein kinase	0.999992	50.8906	S	_NVLS(ph)PPSGLDPYPR_	1.94009	1.38591	1.42322	1.58307	19.5663
gi|472586288	RHTO_06875	330	glycogen synthase kinase 3 beta	0.999938	42.0737	Y	_ILVEGEPNVSY(ph)ICSR_	1.8306	1.26271	1.27073	1.45468	22.3816
gi|472580220	RHTO_07391	243	serine/threonine protein kinase	0.88303	8.77901	S	_NVLSPPS(ph)GLDPYPR_	1.76367	1.4072	1.55962	1.57683	11.3427
gi|472581567	RHTO_04487	341	MAK protein kinase	0.999754	37.3288	Y	_EIASKPPYT(ph)EY(ph)VSTR_	1.71753	1.01292	1.04058	1.25701	31.7468
gi|472588367	RHTO_00267	1451	dual-specificity tyrosine-(Y)-phosphorylation regulated kinase	0.989538	19.972	S	_TSAAAATS(ph)PRTS(ph)PVGR_	1.67884	1.08272	1.40444	1.38866	21.4863
gi|472588367	RHTO_00267	1447	dual-specificity tyrosine-(Y)-phosphorylation regulated kinase	0.991642	21.0759	S	_TSAAAATS(ph)PRTS(ph)PVGR_	1.67884	#DIV/0!	1.40444	1.54164	12.5861
gi|472585178	RHTO_08097	94	aspartate kinase	0.946011	13.6511	S	_GPDLSSSVPSLRNS(ph)PSQSPAPGTPVTPR_	1.66914	1.11017	0.954381	1.24457	30.1997
gi|472583132	RHTO_02402	209	cAMP-dependent protein kinase regulatory subunit	0.771951	7.43536	T	_SAST(ph)AHT(ph)ESDEEVEDPRDDPNYHPGR_	1.65251	#DIV/0!	1.71265	1.68258	2.52744
gi|472582083	RHTO_04077	673	protein kinase IKS1	1	100.376	S	_RAS(ph)S(ph)PALFR_	1.62739	1.93465	1.42167	1.66124	15.5402
gi|472582083	RHTO_04077	674	protein kinase IKS1	1	100.376	S	_RAS(ph)S(ph)PALFR_	1.62739	1.93465	1.42167	1.66124	15.5402
gi|472581567	RHTO_04487	339	MAK protein kinase	0.999909	40.9319	T	_EIASKPPYT(ph)EY(ph)VSTR_	1.60692	1.01292	1.04058	1.22014	27.4757
gi|472586149	RHTO_06736	297	mitogen-activated protein kinase kinase kinase	0.935839	11.6393	T	_TIAT(ph)SPR_	1.46606	1.71444	1.806	1.66217	10.5823
gi|472586149	RHTO_06736	276	mitogen-activated protein kinase kinase kinase	0.996641	25.9986	S	_LAVQRS(ph)PPSTGSSSATTTSTAPR_	1.45235	1.09479	1.18131	1.24281	15.0101
gi|472582981	RHTO_02591	86	ribose-phosphate pyrophosphokinase	0.84076	7.22818	T	_HYGTDSDPEVT(ph)RPGTPLPPLANR_	1.43258	2.14505	1.61862	1.73208	21.3348
gi|472582981	RHTO_02591	90	ribose-phosphate pyrophosphokinase	0.99729	25.4544	T	_HYGTDS(ph)DPEVTRPGT(ph)PLPPLANR_	1.43258	2.36122	1.24293	1.67891	35.6455
gi|472582993	RHTO_02603	68	cAMP-dependent protein kinase catalytic subunit	0.9996	33.9739	S	_KYPSSTGSAGAYAAQQQPS(ph)PPRS(ph)PVEAGYAHHGK_	1.42967	0.644122	0.739208	0.937668	45.7234
gi|472582993	RHTO_02603	64	cAMP-dependent protein kinase catalytic subunit	0.999863	38.6165	S	_KYPSSTGSAGAYAAQQQPS(ph)PPRS(ph)PVEAGYAHHGK_	1.42967	0.709119	1.35545	1.16475	34.0269
gi|472588447	RHTO_00347	364	mitogen-activated protein kinase Maf1	0.975146	16.525	S	_SHS(ph)AS(ph)SVAS(ph)ISLNKK_	1.41277	#DIV/0!	2.80986	2.11131	46.7904
gi|472581963	RHTO_04206	480	p21-activated kinase 1	0.833046	6.98072	S	_KAS(ph)GSAQGGQGPPGPGQGNFEQPR_	1.39254	#DIV/0!	0.768226	1.08039	40.8613
gi|472582208	RHTO_03948	969	inositol-hexakisphosphate kinase	1	90.4641	S	_RGS(ph)ADS(ph)IPLGAPLGR_	1.37582	1.44657	1.55407	1.45882	6.1527
gi|472586828	RHTO_06351	1042	serine/threonine protein kinase ATG1	0.999547	36.6093	S	_KIAPVSAIASGPTTGASTAVAGS(ph)PR_	1.37214	0.723014	1.00074	1.03196	31.5599
gi|472584037	RHTO_01713	313	L-arabinokinase	0.992531	19.7885	S	_S(ph)RPPS(ph)PLSS(ph)PIRR_	1.33517	#DIV/0!	1.88164	1.60841	24.0249
gi|472584037	RHTO_01713	309	L-arabinokinase	0.999901	38.5474	S	_S(ph)RPPS(ph)PLSS(ph)PIRR_	1.33517	#DIV/0!	1.88164	1.60841	24.0249
gi|472582208	RHTO_03948	1017	inositol-hexakisphosphate kinase	1	69.3911	S	_S(ph)FDAIASPLGR_	1.33289	1.23524	#DIV/0!	1.28406	5.37739
gi|472586733	RHTO_06256	334	calcium calmodulin-dependent protein kinase	0.880058	8.7354	T	_TDT(ph)LTDHAPIIEKR_	1.32762	0.500075	1.09922	0.975635	43.8061
gi|472588067	RHTO_03292	41	nucleoside-diphosphate kinase	0.999931	41.6323	S	_LASPS(ph)VEHLEK_	1.32753	1.36201	1.03108	1.2402	14.6692
gi|472582731	RHTO_03321	173	p38 MAP kinase	0.812321	11.0237	Y	_LADPQM(ox)TGY(ph)VSTR_	1.31944	0.633834	1.09889	1.01739	34.4011
gi|472588357	RHTO_00257	1141	calcium/calmodulin-dependent protein kinase kinase	0.999988	49.3191	S	_RAS(ph)IASGR_	1.3019	1.75525	#DIV/0!	1.52857	20.9717
gi|472588447	RHTO_00347	356	mitogen-activated protein kinase Maf1	0.829798	6.14112	S	_S(ph)HSAS(ph)SVASISLNK_	1.28279	1.40235	1.08601	1.25705	12.7068
gi|472586999	RHTO_04677	734	mitogen-activated protein kinase kinase kinase kinase 4-like	0.98581	18.4279	S	_KSS(ph)ADGSSDVPPVPSR_	1.24264	1.53865	1.45632	1.41254	10.8165
gi|472586828	RHTO_06351	732	serine/threonine protein kinase ATG1	0.991218	20.5258	S	_IFGS(ph)PTDGILVR_	1.23209	0.437541	0.613987	0.761205	54.8118
gi|472581603	RHTO_04523	545	serine/threonine protein kinase	0.938481	11.8342	S	_KSEPTGS(ph)FLQK_	1.22365	1.06809	0.828844	1.04019	19.1189
gi|472586390	RHTO_06977	45	mitogen-activated protein kinase kinase	1	65.7559	S	_LSLAPAS(ph)PR_	1.14695	0.751089	0.88308	0.927039	21.742
gi|472581452	RHTO_05133	431	protein serine/threonine kinase,ataxia telangectasia mutated family protein	0.999526	33.2372	S	_AVEAM(ox)LS(ph)PTQR_	1.13144	0.802826	0.483746	0.806004	40.1807
gi|472581603	RHTO_04523	543	serine/threonine protein kinase	0.962751	14.1241	T	_SEPT(ph)GSFLQK_	1.13068	0.973994	1.18364	1.09611	9.94585
gi|472581603	RHTO_04523	1217	serine/threonine protein kinase	0.999881	39.2631	S	_ASTVGEIS(ph)PSR_	1.09837	0.631832	#DIV/0!	0.865101	38.1334
gi|472581603	RHTO_04523	1431	serine/threonine protein kinase	0.964673	14.3628	S	_DGEKQPSS(ph)PGGAGEDSQTSLPM(ox)SSLDPR_	1.09438	1.05374	#DIV/0!	1.07406	2.67543
gi|472582208	RHTO_03948	403	inositol-hexakisphosphate kinase	0.914957	11.9623	T	_SNT(ph)PSHS(ph)PPLGR_	1.06848	1.4323	0.827952	1.10958	27.4214
gi|472583132	RHTO_02402	595	cAMP-dependent protein kinase regulatory subunit	1	114.22	S	_RES(ph)FGQGFEGSR_	1.06412	3.34236	1.92009	2.10886	54.5693
gi|472580941	RHTO_05632	215	protein serine/threonine kinase	0.999897	40.0137	S	_HGS(ph)FQESSPR_	1.0559	0.801539	1.15405	1.00383	18.124
gi|472581376	RHTO_05278	489	choline kinase	0.929772	11.5547	S	_YSSTASSLVSS(ph)PLLLPHR_	1.02782	#DIV/0!	0.89222	0.960022	9.9879
gi|472582208	RHTO_03948	1277	inositol-hexakisphosphate kinase	0.995582	23.8218	S	_S(ph)M(ox)SVGGNDEDEEDNS(ph)DSRAPLAAPSHR_	0.975324	0.528569	0.882924	0.795606	29.6416
gi|472583288	RHTO_02231	18	histidine kinase	0.999955	46.3806	S	_DSLVPVSSEKPPS(ph)PQR_	0.968054	3.35841	2.7389	2.35512	52.6737
gi|472582208	RHTO_03948	972	inositol-hexakisphosphate kinase	1	90.4641	S	_RGS(ph)ADS(ph)IPLGAPLGR_	0.92081	1.27199	1.40782	1.20021	20.9392
gi|472586149	RHTO_06736	1410	mitogen-activated protein kinase kinase kinase	0.840924	7.30205	T	_ELLQHGFIRDPDALAASQQT(ph)PTR_	0.910913	#DIV/0!	0.494878	0.702895	41.8527
gi|472583288	RHTO_02231	800	histidine kinase	0.9998	37.8792	S	_DLS(ph)VSTQASTFR_	0.8992	1.39103	0.650533	0.980256	38.4436
gi|472583288	RHTO_02231	150	histidine kinase	0.804429	9.15212	S	_TTLPSNTAS(ph)HR_	0.889126	#DIV/0!	2.44654	1.66783	66.0293
gi|472583288	RHTO_02231	148	histidine kinase	0.938659	11.774	T	_TTLPS(ph)NT(ph)ASHR_	0.889126	#DIV/0!	1.88232	1.38572	50.6806
gi|472583288	RHTO_02231	146	histidine kinase	0.984232	17.6737	S	_TTLPS(ph)NT(ph)ASHR_	0.889126	#DIV/0!	1.88232	1.38572	50.6806
gi|472582208	RHTO_03948	61	inositol-hexakisphosphate kinase	0.809043	6.48269	S	_SGS(ph)PAS(ph)SPGQSSSGSSIFDRPSASSHSTR_	0.875964	1.13582	1.07316	1.02831	13.1875
gi|472582208	RHTO_03948	1265	inositol-hexakisphosphate kinase	0.946432	12.0417	S	_SM(ox)S(ph)VGGNDEDEEDNS(ph)DSRAPLAAPSHR_	0.834585	0.684463	0.568666	0.695905	19.159
gi|472588594	RHTO_00494	112	6-phosphofructokinase	0.819007	6.53516	T	_GNQDATAHVET(ph)PAT(ph)SPPLAGAPTAIDPETSKK_	0.829944	0.914244	0.6031	0.782429	20.567
gi|472580365	RHTO_06620	240	[3-methyl-2-oxobutanoate dehydrogenase (acetyl-transferring)] kinase	0.805884	8.31678	S	_IEPSARPPSS(ph)SLSASR_	0.827541	0.793273	0.410105	0.676973	34.2331
gi|472586360	RHTO_06947	63	NAD+ kinase	1	79.0409	S	_STAPVS(ph)PGR_	0.802697	0.727379	1.77418	1.10142	53.0085
gi|472588594	RHTO_00494	109	6-phosphofructokinase	0.997834	27.651	T	_GNQDATAHVET(ph)PATS(ph)PPLAGAPTAIDPETSKK_	0.802439	0.829325	0.599628	0.743798	16.8831
gi|472581376	RHTO_05278	41	choline kinase	0.943414	14.5352	S	_SS(ph)T(ph)DSFSLEHNR_	0.801025	0.462278	1.52849	0.930598	58.5417
gi|472585472	RHTO_07897	1622	histidine kinase	0.999618	33.8674	S	_RRPS(ph)HPSYGDGS(ph)E_	0.776699	0.538764	0.784375	0.699946	19.9502
gi|472588594	RHTO_00494	113	6-phosphofructokinase	0.975616	15.5022	S	_GNQDATAHVET(ph)PATS(ph)PPLAGAPTAIDPETSKK_	0.775795	1.63506	1.42434	1.2784	35.031
gi|472583277	RHTO_02243	542	polo-like kinase	0.99762	26.2275	S	_AATAPDS(ph)PISELLR_	0.767813	0.825968	0.393376	0.662386	35.4442
gi|472581879	RHTO_04369	234	checkpoint serine/threonine-protein kinase	1	63.1853	S	_M(ox)LVAPPPPS(ph)PPR_	0.765521	#DIV/0!	0.621852	0.693686	14.6449
gi|472581565	RHTO_04485	179	serine/threonine protein kinase Haspin	0.997444	26.3478	S	_TIEDPAAGS(ph)AEESENVVGPVKR_	0.755287	0.506047	#DIV/0!	0.630667	27.9449
gi|472588357	RHTO_00257	258	calcium/calmodulin-dependent protein kinase kinase	1	77.0524	S	_RGS(ph)S(ph)PAALTGIDPANAPK_	0.742887	0.730941	0.948587	0.807471	15.1529
gi|472581879	RHTO_04369	592	checkpoint serine/threonine-protein kinase	0.978758	16.6348	S	_NLLSPS(ph)PPR_	0.733514	#DIV/0!	0.494022	0.613768	27.5913
gi|472581376	RHTO_05278	44	choline kinase	0.999536	35.5182	S	_RSS(ph)TDS(ph)FSLEHNR_	0.73014	1.48017	1.1198	1.11003	33.7925
gi|472586183	RHTO_06770	246	serine/threonine protein kinase Nrc-2	0.997639	26.2592	S	_RVAS(ph)APNTK_	0.725742	0.954836	0.784745	0.821774	14.4749
gi|472585460	RHTO_07885	346	serine/threonine protein kinase FSK	0.857541	7.79684	S	_RTS(ph)GLGSR_	0.725163	0.791264	0.759301	0.758576	4.35772
gi|472582569	RHTO_03483	554	type II pantothenate kinase	1	129.055	T	_NIGAGAET(ph)PPQDGGGLGLR_	0.698763	0.388319	0.505791	0.530958	29.5211
gi|472585545	RHTO_07438	880	serine/threonine protein kinase	0.999856	38.4149	S	_KGS(ph)LPSDDPR_	0.685307	#DIV/0!	0.796052	0.740679	10.5725
gi|472586390	RHTO_06977	157	mitogen-activated protein kinase kinase	1	86.0169	S	_RPS(ph)FNNEAGSLQAK_	0.673265	0.826651	0.832778	0.777565	11.6233
gi|472580941	RHTO_05632	108	protein serine/threonine kinase	0.988752	20.4898	S	_SQVPSRQAS(ph)S(ph)VGFGFLGAEGR_	0.664143	0.644579	1.22421	0.844312	38.9845
gi|472580941	RHTO_05632	109	protein serine/threonine kinase	0.849657	7.89492	S	_SQVPSRQAS(ph)S(ph)VGFGFLGAEGR_	0.643045	#DIV/0!	0.77688	0.709963	13.3296
gi|472580525	RHTO_06460	330	histidine kinase	1	94.5291	S	_RQS(ph)FDQALVTLSQK_	0.598158	0.623947	0.67254	0.631548	5.98044
gi|472586999	RHTO_04677	798	mitogen-activated protein kinase kinase kinase kinase 4-like	0.999977	46.2922	S	_RRS(ph)S(ph)IAEQVAQTEQDAQLFPAAK_	0.566765	#DIV/0!	0.697058	0.631912	14.5798
gi|472586999	RHTO_04677	799	mitogen-activated protein kinase kinase kinase kinase 4-like	0.999977	46.2922	S	_RRS(ph)S(ph)IAEQVAQTEQDAQLFPAAK_	0.566765	#DIV/0!	0.697058	0.631912	14.5798
gi|472588594	RHTO_00494	32	6-phosphofructokinase	0.999961	45.1273	T	_SPHLSGAET(ph)PPPFAFQSPGESQPQT(ph)PGKR_	0.553159	0.72223	0.704573	0.659987	14.0816
gi|472588594	RHTO_00494	24	6-phosphofructokinase	0.945295	9.39121	S	_VAQQLEAILPGGGPKS(ph)PHLS(ph)GAETPPPFAFQSPGESQPQTPGK_	0.507666	0.749288	0.669478	0.642144	19.1715
gi|472588594	RHTO_00494	28	6-phosphofructokinase	0.799243	5.74311	S	_VAQQLEAILPGGGPKS(ph)PHLS(ph)GAETPPPFAFQSPGESQPQTPGK_	0.507666	#DIV/0!	0.402982	0.455324	16.2571
gi|472588367	RHTO_00267	1105	dual-specificity tyrosine-(Y)-phosphorylation regulated kinase	1	76.6972	S	_KAS(ph)LGQGGGSALPR_	0.482742	0.370206	0.446249	0.433066	13.2577
gi|472587445	RHTO_02667	65	serine/threonine protein kinase	0.999842	38.003	S	_SLDPLPS(ph)PLESR_	0.470876	0.620078	0.758553	0.616502	23.3367
gi|472582231	RHTO_03971	712	1-phosphatidylinositol 4-kinase	0.876555	9.18463	S	_SRTS(ph)IS(ph)SATGEPLSVGPK_	0.463134	0.332436	0.451162	0.415577	17.3857
gi|472583132	RHTO_02402	183	cAMP-dependent protein kinase regulatory subunit	0.921409	15.7008	S	_APGSTTPPDADSSPSNTQRFS(ph)R_	0.457101	1.11707	#DIV/0!	0.787085	59.2906
gi|472587433	RHTO_05112	206	serine/threonine protein kinase	0.999999	59.2126	S	_QAS(ph)APYFASAR_	0.413514	0.175217	0.18919	0.259307	51.5719
gi|472581567	RHTO_04487	544	MAK protein kinase	0.993829	23.1947	S	_AGSSLAS(ph)PR_	0.410341	0.247543	0.675858	0.444581	48.6303
gi|472583440	RHTO_01943	247	C-terminal domain kinase, subunit gamma, CTK3	0.951697	12.9453	S	_KSS(ph)IAAAAAEK_	0.400096	0.677645	0.838856	0.638865	34.739
gi|472586149	RHTO_06736	856	mitogen-activated protein kinase kinase kinase	0.999938	42.1293	S	_RYS(ph)NAS(ph)LASR_	0.360166	0.0373832	0.555741	0.317763	82.3781
gi|472585587	RHTO_07480	7	phosphoenolpyruvate carboxykinase (ATP)	0.999999	65.4285	T	_AAT(ph)PLRHGEEPTDPSSQPTYGLLGK_	0.355051	0.61717	0.159972	0.377397	60.7891
gi|472582614	RHTO_03528	1753	1-phosphatidylinositol-3-phosphate 5-kinase	0.958398	13.6774	S	_TAS(ph)RPSS(ph)PVTAR_	0.342994	0.570874	0.695991	0.53662	33.3521
gi|472582614	RHTO_03528	1757	1-phosphatidylinositol-3-phosphate 5-kinase	0.774529	5.66096	S	_TASRPSS(ph)PVTAR_	0.342994	#DIV/0!	3.12842	1.73571	113.475
gi|472581963	RHTO_04206	482	p21-activated kinase 1	0.970698	15.2019	S	_KASGS(ph)AQGGQGPPGPGQGNFEQPR_	0.335762	0.994431	#DIV/0!	0.665097	70.0273
gi|472585240	RHTO_08159	319	SFRS protein kinase	0.99903	30.8444	S	_ISDSGGS(ph)YVGS(ph)IKK_	0.318674	0.343572	0.763475	0.47524	52.59
gi|472580941	RHTO_05632	670	protein serine/threonine kinase	1	95.8317	S	_EGS(ph)VPAITPLER_	0.313735	0.38432	0.356633	0.351563	10.1161
gi|472587462	RHTO_02684	261	serine/threonine protein kinase PRP4	1	91.0923	T	_YASTNPSAAAS(ph)PAGGAT(ph)PDIKR_	0.305018	2.13151	1.37287	1.2698	72.2633
gi|472585240	RHTO_08159	323	SFRS protein kinase	1	75.239	S	_ISDSGGS(ph)YVGS(ph)IKK_	0.298063	1.30181	2.30579	1.30189	77.1084
gi|472582614	RHTO_03528	469	1-phosphatidylinositol-3-phosphate 5-kinase	0.998922	29.5324	T	_ISEAGSDRPAT(ph)PVFEEAGDASPAES(ph)R_	0.245604	0.189955	0.101062	0.178874	40.7579
gi|472582614	RHTO_03528	479	1-phosphatidylinositol-3-phosphate 5-kinase	0.996928	25.4051	S	_ISEAGSDRPAT(ph)PVFEEAGDAS(ph)PAESR_	0.245604	0.189955	#DIV/0!	0.217779	18.0685
gi|472586446	RHTO_07033	16	AGC/Akt protein kinase	0.992479	21.2046	T	_FFGGVSQPQDQTT(ph)PK_	0.238909	0.477509	0.461744	0.392721	33.9779
gi|472586446	RHTO_07033	920	AGC/Akt protein kinase	0.988628	19.4231	S	_SRPSVQPLTSS(ph)VQENFR_	0.216943	0.298597	0.388048	0.301196	28.4141
gi|472586149	RHTO_06736	859	mitogen-activated protein kinase kinase kinase	0.999965	45.9953	S	_RYS(ph)NAS(ph)LASR_	0.211586	#DIV/0!	0.555741	0.383664	63.429
gi|472584522	RHTO_00862	252	thiamin pyrophosphokinase-related protein	1	113.542	S	_RPS(ph)M(ox)QEEFAGEGGVK_	0.199326	0.166811	0.242954	0.203031	18.8181
gi|472586549	RHTO_06072	28	hexokinase	0.997184	25.4913	S	_GS(ph)VSEVGR_	0.180024	#DIV/0!	0.282949	0.231487	31.4398
gi|472586549	RHTO_06072	30	hexokinase	0.996267	24.2628	S	_GSVS(ph)EVGRR_	0.179821	0.208338	0.185038	0.191065	7.94704
gi|472585460	RHTO_07885	334	serine/threonine protein kinase FSK	0.999872	38.9282	S	_RGS(ph)ASGGPVLER_	0.173418	0.314733	0.441131	0.309761	43.2352
gi|472587009	RHTO_04687	995	serine/threonine protein kinase RIM15	0.999997	54.7996	S	_NVAS(ph)AQDLSR_	0.0879198	0.36499	0.616789	0.356566	74.1896
gi|472587842	RHTO_03066	404	casein kinase 1	1	109.033	S	_VGRQPSASATPAPGAS(ph)AM(ox)AVK_	0.0187981	0.0475851	0.0972006	0.0545279	72.7329
other proteins
gi|472581378	RHTO_05280	68	1,3-beta-glucan synthase, glycosyltransferase family 48 protein	0.999957	46.4946	S	_RGDGS(ph)QEGYYGGYQQPPGPFQGR_	2.23909	1.43322	1.49318	1.72183	26.0747
gi|472582167	RHTO_03906	37	116 kda u5 small nuclear ribonucleoprotein component	0.99644	24.47	S	_QQDGAAS(ph)PTPAPLR_	1.75263	1.27285	1.11526	1.38025	24.0523
gi|472584865	RHTO_00719	534	26S proteasome non-atpase regulatory subunit 3	1	103.606	S	_ERELAKEIEEGDS(ph)DADLDGPGDM(ox)DSF_	0.381738	0.499351	0.417397	0.432829	13.933
gi|472584197	RHTO_01450	184	3' tRNA processing endoribonuclease	0.957027	13.4651	S	_RRSS(ph)LS(ph)VS(ph)PPPPAK_	#DIV/0!	1.0565	0.866401	0.961451	13.9811
gi|472584197	RHTO_01450	208	3' tRNA processing endoribonuclease	0.982265	17.5087	S	_RSPS(ph)PS(ph)FDTAAENFNPAR_	#DIV/0!	1.17292	0.86192	1.01742	21.6147
gi|472584197	RHTO_01450	186	3' tRNA processing endoribonuclease	0.997319	25.5142	S	_RRSS(ph)LS(ph)VS(ph)PPPPAK_	#DIV/0!	1.0565	0.866401	0.961451	13.9811
gi|472584197	RHTO_01450	188	3' tRNA processing endoribonuclease	1	62.266	S	_RRSS(ph)LS(ph)VS(ph)PPPPAK_	#DIV/0!	1.0565	0.866401	0.961451	13.9811
gi|472584197	RHTO_01450	204	3' tRNA processing endoribonuclease	0.995467	23.3582	S	_RS(ph)PS(ph)PSFDTAAENFNPAR_	1.24572	1.18868	0.920641	1.11835	15.5208
gi|472584197	RHTO_01450	206	3' tRNA processing endoribonuclease	0.99803	27.7833	S	_RSPS(ph)PS(ph)FDTAAENFNPAR_	1.24572	1.17292	0.983381	1.13401	11.9425
gi|472584883	RHTO_00737	160	3',5'-cyclic-nucleotide phosphodiesterase	0.999811	37.1374	S	_RAS(ph)LQGTPS(ph)PLR_	#DIV/0!	7.74533	2.62329	5.18431	69.8613
gi|472584883	RHTO_00737	154	3',5'-cyclic-nucleotide phosphodiesterase	1	67.4822	S	_RAS(ph)LQGTPSPLR_	2.10864	1.89473	1.44134	1.8149	18.7744
gi|472584883	RHTO_00737	201	3',5'-cyclic-nucleotide phosphodiesterase	1	122.214	S	_S(ph)VDVGVLGVGTR_	1.84305	1.84642	1.21124	1.63357	22.3896
gi|472584883	RHTO_00737	929	3',5'-cyclic-nucleotide phosphodiesterase	1	130.007	S	_RGS(ph)LGNALEER_	1.4072	1.96386	1.38951	1.58686	20.5827
gi|472583243	RHTO_02272	393	3-deoxy-7-phosphoheptulonate synthase	0.969165	14.9735	S	_ASS(ph)VEGVR_	#DIV/0!	0.33279	2.11493	1.22386	102.966
gi|472587930	RHTO_03154	514	3-deoxy-9-phosphoheptulonate synthase	0.999691	36.3403	S	_ILDELASRPGS(ph)VDSR_	1.18483	0.60529	0.726533	0.838886	36.4378
gi|472584595	RHTO_00935	618	5'-3' exoribonuclease 2	1	38.8717	S	_RAAPPDDGVGS(ph)QDPDDALDPEVDEDDEEDADGVNAFLK_	0.900252	0.56699	0.652316	0.706519	24.5028
gi|472584595	RHTO_00935	602	5'-3' exoribonuclease 2	0.979557	16.8048	S	_LKAEM(ox)LASSEDQM(ox)ADEATS(ph)PR_	0.307522	0.320924	0.223319	0.283922	18.6353
gi|472585267	RHTO_07691	420	5-methyltetrahydropteroyltriglutamate-homocysteine S-methyltransferase	0.975237	15.9531	S	_KSS(ph)FPAR_	0.388651	0.466222	0.379406	0.411426	11.5887
gi|472587300	RHTO_04979	76	AAA family ATPase	0.984806	18.5028	S	_EGSVVS(ph)LLSDEEDKVVAPK_	#DIV/0!	1.38207	1.54698	1.46453	7.96209
gi|472587300	RHTO_04979	79	AAA family ATPase	0.999711	35.3982	S	_EGSVVSLLS(ph)DEEDKVVAPK_	2.25927	1.44448	1.3068	1.67018	30.8224
gi|472586960	RHTO_04638	1207	AAA family ATPase	1	88.8013	S	_GGS(ph)LPPEDGAVAAAETAAAAGGAFK_	1.9192	1.50639	0.993147	1.47291	31.4977
gi|472587300	RHTO_04979	548	AAA family ATPase	1	66.0043	S	_NHLVVQGGGPGS(ph)PK_	0.910747	0.622007	0.681292	0.738015	20.6634
gi|472581321	RHTO_05437	550	ABC bile acid transporter	0.945354	13.3473	S	_ATPAS(ph)GSEADDLDEEELGKELEK_	3.72523	2.65682	1.77069	2.71758	36.013
gi|472581321	RHTO_05437	552	ABC bile acid transporter	0.994208	23.0001	S	_ATPASGS(ph)EADDLDEEELGKELEK_	3.42395	2.67465	1.62805	2.57555	35.0232
gi|472588366	RHTO_00266	688	ABC transporter	0.986961	21.801	S	_RSTGAPS(ph)IDGDETELETR_	#DIV/0!	0.846883	0.699301	0.773092	13.4986
gi|472582973	RHTO_02583	76	ABC transporter	0.909898	8.54859	S	_RELS(ph)RSS(ph)S(ph)LHR_	4.59982	7.28704	#DIV/0!	5.94343	31.9706
gi|472582973	RHTO_02583	77	ABC transporter	0.995489	20.4296	S	_ELSRS(ph)SS(ph)LHR_	4.59982	7.28704	#DIV/0!	5.94343	31.9706
gi|472588366	RHTO_00266	654	ABC transporter	0.906867	9.98137	S	_SSASS(ph)DASVEDALIQLDGSR_	1.34689	1.75276	2.24694	1.7822	25.2915
gi|472588366	RHTO_00266	657	ABC transporter	0.999917	43.4421	S	_SSASS(ph)DAS(ph)VEDALIQLDGSR_	1.34689	1.86672	1.3427	1.51877	19.841
gi|472586450	RHTO_07037	45	ABC-2 type transporter, pleiotropic drug resistance	0.854355	7.68343	S	_TIS(ph)RDVPVNYFSPDGDLQR_	2.67137	2.90554	3.27279	2.9499	10.2767
gi|472583500	RHTO_02004	1139	acetyl-CoA carboxylase	0.843605	7.34158	S	_KAAS(ph)ESEPPTPTTGLTSQR_	11.5847	2.93126	2.23854	5.58482	93.2447
gi|472583500	RHTO_02004	1141	acetyl-CoA carboxylase	0.999998	57.9624	S	_AASES(ph)EPPTPTTGLTSQR_	8.65951	8.00128	5.76369	7.47483	20.3081
gi|472583500	RHTO_02004	1145	acetyl-CoA carboxylase	0.999383	33.1692	T	_KAASES(ph)EPPT(ph)PTTGLTSQR_	2.52615	8.52733	3.18705	4.74684	69.3226
gi|472588176	RHTO_00076	284	actin binding protein	0.999877	39.1077	S	_KYS(ph)VDVGYER_	1.19011	1.42558	1.09017	1.23528	13.9408
gi|472586808	RHTO_06331	156	actin cytoskeleton protein	1	64.7079	S	_VTTAAS(ph)PHVER_	4.71387	1.82027	1.09641	2.54351	75.2546
gi|472580657	RHTO_05972	835	actin patch protein	0.794256	5.86635	S	_RADS(ph)LATPVADPAASTETPSTPLAPPK_	#DIV/0!	1.15833	1.36782	1.26308	11.7278
gi|472587370	RHTO_05049	505	actin-interacting protein 3	0.812047	8.03352	S	_GPSASPIM(ox)EEDDETT(ph)SPKHS(ph)PPVSR_	14.2706	3.04368	1.37838	6.23089	112.54
gi|472587370	RHTO_05049	310	actin-interacting protein 3	0.836094	7.07659	S	_RTS(ph)PPPPR_	1.84176	1.58165	1.24884	1.55742	19.0827
gi|472580630	RHTO_05945	157	actin-related protein 8	0.971099	16.0712	S	_ETS(ph)PSSASDPLSR_	#DIV/0!	0.882379	1.22596	1.05417	23.0462
gi|472582151	RHTO_03890	669	acyl-CoA oxidase	1	91.5284	S	_AANPHS(ph)PVAPYFER_	2.37456	2.33792	1.91055	2.20768	11.6853
gi|472584519	RHTO_00859	297	acyl-CoA-binding protein, ACBP	0.997581	25.8811	S	_HVASS(ph)IRS(ph)NAGS(ph)TPVPR_	0.982801	0.45977	1.35141	0.931326	48.1079
gi|472584519	RHTO_00859	293	acyl-CoA-binding protein, ACBP	0.999361	33.3888	S	_HVASS(ph)IRS(ph)NAGS(ph)TPVPR_	0.459643	0.450227	0.681524	0.530465	24.6775
gi|472584519	RHTO_00859	290	acyl-CoA-binding protein, ACBP	0.982173	17.5359	S	_HVASS(ph)IRS(ph)NAGS(ph)TPVPR_	0.427679	0.859254	1.35141	0.879447	52.5551
gi|472586787	RHTO_06310	1339	adenylate cyclase	0.999964	45.7069	S	_KGS(ph)EISLTDK_	5.45019	4.85037	#DIV/0!	5.15028	8.23521
gi|472586787	RHTO_06310	278	adenylate cyclase	1	66.7002	S	_RPS(ph)LAPS(ph)YSDAGPR_	0.621891	0.286566	0.292056	0.400171	47.9881
gi|472586787	RHTO_06310	184	adenylate cyclase	0.823075	6.67652	T	_RPT(ph)TPIGAFVTGSSR_	0.341717	0.386802	#DIV/0!	0.36426	8.75208
gi|472586787	RHTO_06310	282	adenylate cyclase	0.789692	5.75116	S	_RPS(ph)LAPS(ph)YSDAGPR_	0.0603464	#DIV/0!	0.340983	0.200665	98.8913
gi|472585475	RHTO_07900	146	adiponectin receptor protein	0.995226	23.1579	S	_TLSAS(ph)SGS(ph)GDEVEKLK_	15.4868	#DIV/0!	7.27326	11.38	51.0356
gi|472585475	RHTO_07900	143	adiponectin receptor protein	0.991895	21.1656	S	_TLSAS(ph)SGS(ph)GDEVEKLK_	7.22178	#DIV/0!	7.27326	7.24752	0.502221
gi|472585776	RHTO_07669	371	Adipose-regulatory protein, Seipin family protein	0.999999	59.9902	S	_AAES(ph)EEEVKPLLTPSEVTTEGEEEEER_	3.69208	0.643708	0.59848	1.64476	107.808
gi|472585776	RHTO_07669	386	Adipose-regulatory protein, Seipin family protein	0.957825	13.5657	T	_AAESEEEVKPLLTPSEVTT(ph)EGEEEEER_	2.90537	#DIV/0!	4.27826	3.59181	27.0275
gi|472582568	RHTO_03482	526	AdoMet-dependent rRNA methyltransferase spb1	0.999859	38.5075	S	_RLPLNPIPEAALAAQNAEDDDEDVS(ph)DTER_	1.03248	0.915583	0.883939	0.944001	8.28843
gi|472588326	RHTO_00226	74	alpha,alpha-trehalase, glycoside hydrolase family 37 protein	0.999979	49.7949	S	_TLS(ph)ASEGPQTILR_	0.0985319	0.129729	0.180408	0.136223	30.3345
gi|472584951	RHTO_00805	156	alpha/beta hydrolase fold-3 domain containing protein	0.998472	28.1517	S	_DADLAEENS(ph)DAGSVFGGR_	#DIV/0!	0.120282	0.0657073	0.0929946	41.4971
gi|472587175	RHTO_04854	222	alternative cyclin Pcl12	1	89.6238	S	_RAS(ph)DAAIALLR_	0.23967	#DIV/0!	0.160259	0.199965	28.0811
gi|472586225	RHTO_06812	154	AMFR protein	1	111.769	S	_GKEVEGAQAGGWS(ph)PNAAER_	#DIV/0!	0.42924	0.550146	0.489693	17.4586
gi|472582679	RHTO_03593	2	amino acid transmembrane transporter	0.769213	7.53926	S	_S(ph)S(ph)DKDS(ph)IDTYGDEEQLASFGYK_	#DIV/0!	0.722857	0.77821	0.750533	5.21506
gi|472582679	RHTO_03593	3	amino acid transmembrane transporter	0.769213	7.53926	S	_S(ph)S(ph)DKDS(ph)IDTYGDEEQLASFGYK_	#DIV/0!	0.722857	0.77821	0.750533	5.21506
gi|472582679	RHTO_03593	11	amino acid transmembrane transporter	0.865542	8.31852	Y	_SSDKDS(ph)IDTY(ph)GDEEQLASFGYK_	#DIV/0!	0.187628	0.98174	0.584684	96.0386
gi|472582625	RHTO_03539	33	amino acid transmembrane transporter	0.99219	23.3831	T	_GPPAQFALDATDS(ph)PGPTPAAT(ph)PPSHSR_	2.77054	0.978569	1.01378	1.58763	64.5355
gi|472582625	RHTO_03539	25	amino acid transmembrane transporter	0.982444	20.516	S	_GPPAQFALDATDS(ph)PGPTPAAT(ph)PPSHSR_	1.42686	0.978569	2.46427	1.62323	46.9475
gi|472582679	RHTO_03593	7	amino acid transmembrane transporter	0.977673	15.0812	S	_SSDKDS(ph)IDTY(ph)GDEEQLASFGYK_	0.563793	0.27365	0.428908	0.422117	34.3958
gi|472582679	RHTO_03593	10	amino acid transmembrane transporter	0.999991	52.2768	T	_SSDKDS(ph)IDT(ph)YGDEEQLASFGYK_	0.563793	0.226593	0.428908	0.406432	41.7586
gi|472582303	RHTO_03793	37	amino acid transmembrane transporter	0.999936	41.8564	S	_SDIEKAS(ph)PDGS(ph)VLHGAAVDGVINPEK_	0.0969556	0.149122	0.15008	0.132053	23.0202
gi|472583624	RHTO_02128	21	amino acid transporter	0.999963	44.3014	S	_EDRTPLLHGAS(ph)DDEAGPVK_	4.28412	0.816127	#DIV/0!	2.55012	96.1617
gi|472587232	RHTO_04911	470	aminoacyl-tRNA ligase	0.999989	49.5541	S	_KPFHPLNNPPPDS(ph)ES(ph)S(ph)PEPEEVPLPTIGK_	0.862143	#DIV/0!	0.593085	0.727614	26.1475
gi|472587232	RHTO_04911	471	aminoacyl-tRNA ligase	0.999989	49.5541	S	_KPFHPLNNPPPDS(ph)ES(ph)S(ph)PEPEEVPLPTIGK_	0.862143	#DIV/0!	0.593085	0.727614	26.1475
gi|472587232	RHTO_04911	468	aminoacyl-tRNA ligase	0.999989	49.6403	S	_KPFHPLNNPPPDS(ph)ES(ph)S(ph)PEPEEVPLPTIGK_	0.862143	#DIV/0!	0.593085	0.727614	26.1475
gi|472583756	RHTO_01846	547	ammonium transmembrane transporter	0.814219	7.05737	S	_LSGADLERGES(ph)VTGDAGGGPSQAPPANSR_	0.466832	0.39582	#DIV/0!	0.431326	11.6415
gi|472584956	RHTO_00810	119	AMP deaminase	0.999576	33.8337	S	_SRSDS(ph)LASAAR_	0.3778	1.13779	#DIV/0!	0.757793	70.9152
gi|472580524	RHTO_06459	341	Ankyrin repeat protein	1	105.032	S	_RLS(ph)FNS(ph)LR_	0.425677	#DIV/0!	1.10762	0.766646	62.8978
gi|472587092	RHTO_04770	845	Annexin family protein	0.999657	36.5206	S	_VLS(ph)PTPSATSR_	2.9215	1.86154	#DIV/0!	2.39152	31.3401
gi|472587092	RHTO_04770	1015	Annexin family protein	0.999707	35.3368	S	_TTS(ph)EQFQQLVR_	2.7852	2.52455	2.06288	2.45754	14.8846
gi|472587092	RHTO_04770	166	Annexin family protein	0.999798	36.9509	S	_IDPTFLATAEGS(ph)PVAR_	0.760803	1.03821	#DIV/0!	0.899505	21.8068
gi|472585941	RHTO_07217	248	anti-proliferative protein domain containing protein	0.997171	29.652	S	_LLPPRS(ph)PS(ph)PGNSSSPSSR_	1.22861	0.935804	0.860215	1.00821	19.2992
gi|472585941	RHTO_07217	246	anti-proliferative protein domain containing protein	0.998935	35.2999	S	_LLPPRS(ph)PS(ph)PGNSSSPSSR_	1.22861	0.935804	0.860215	1.00821	19.2992
gi|472584838	RHTO_00692	37	anucleate primary sterigmata protein A	0.956452	13.609	S	_SSS(ph)PPLTPATLLNR_	#DIV/0!	0.409954	0.627549	0.518752	29.6603
gi|472581761	RHTO_04250	143	anucleate primary sterigmata protein b	0.990831	21.3048	S	_HASASTAVTSQPS(ph)PSSR_	#DIV/0!	2.38954	1.7452	2.06737	22.0386
gi|472581761	RHTO_04250	1068	anucleate primary sterigmata protein b	0.999985	48.2193	S	_RSPNPNASPNPNS(ph)PR_	4.23191	1.80411	#DIV/0!	3.01801	56.8823
gi|472581761	RHTO_04250	115	anucleate primary sterigmata protein b	0.999976	46.6115	S	_AAS(ph)ALSSR_	1.95046	1.96707	1.8938	1.93711	1.98329
gi|472581761	RHTO_04250	1063	anucleate primary sterigmata protein b	0.994752	22.8357	S	_RSPNPNAS(ph)PNPNSPR_	1.85028	1.21849	1.23151	1.43342	25.1888
gi|472581761	RHTO_04250	77	anucleate primary sterigmata protein b	0.884238	8.83005	S	_GTDRADETSAAGDGDDASS(ph)LLDEEM(ox)PAR_	1.05854	#DIV/0!	0.64612	0.852329	34.2148
gi|472581761	RHTO_04250	76	anucleate primary sterigmata protein b	0.821349	6.62544	S	_RGTDRADETSAAGDGDDAS(ph)SLLDEEM(ox)PAR_	0.563063	#DIV/0!	0.64612	0.604592	9.71402
gi|472586417	RHTO_07004	592	AP-2 complex subunit beta	0.999983	47.6171	S	_YLQDS(ph)PALSQEAK_	#DIV/0!	1.34387	2.52544	1.93466	43.1859
gi|472588205	RHTO_00105	870	AP-3 complex subunit delta-1	0.975045	15.9187	S	_SVS(ph)PVEPPQEEKVEPAAEVR_	3.47754	3.63769	2.94586	3.35369	10.7989
gi|472588397	RHTO_00297	57	AP-3 complex subunit mu-1	0.999414	32.3188	S	_SGDHLDDES(ph)EDEEDQVEQPWAHASR_	0.353995	0.452489	0.285551	0.364012	23.0538
gi|472581679	RHTO_04403	190	Arf GTPase activating protein	0.867849	8.85639	S	_KAAATTSIDLLSAAPSTGRPS(ph)SSSS(ph)AR_	#DIV/0!	1.30149	1.06615	1.18382	14.0568
gi|472580662	RHTO_05977	747	ARF guanyl-nucleotide exchange factor	0.999858	37.833	S	_DLS(ph)NS(ph)SLAHDPFPTQPR_	3.89166	1.3908	1.55121	2.27789	61.4545
gi|472580662	RHTO_05977	602	ARF guanyl-nucleotide exchange factor	1	185.947	S	_GPAES(ph)PQQLFR_	2.47776	0.528709	1.22354	1.41	70.0576
gi|472580662	RHTO_05977	749	ARF guanyl-nucleotide exchange factor	0.941027	9.36597	S	_DLSNS(ph)S(ph)LAHDPFPTQPR_	2.11779	1.32069	1.23821	1.5589	31.1613
gi|472580662	RHTO_05977	750	ARF guanyl-nucleotide exchange factor	0.99802	26.7374	S	_DLS(ph)NSS(ph)LAHDPFPTQPR_	2.11779	1.57667	1.51297	1.73581	19.1458
gi|472581901	RHTO_04144	628	ARF guanyl-nucleotide exchange factor	0.999788	38.5416	S	_VAFAGSTAPLTPS(ph)PLS(ph)SPVKER_	1.49287	#DIV/0!	1.2306	1.36174	13.6188
gi|472586422	RHTO_07009	775	Armadillo-type fold domain containing protein	1	127.715	S	_LARPQAVLQDS(ph)PDPR_	1.81153	0.646705	0.6879	1.04871	63.0241
gi|472583439	RHTO_01942	14	Armadillo-type fold domain containing protein	0.972212	16.1178	S	_KAHS(ph)PSSGSGGSSTLR_	0.432246	0.294369	0.29715	0.341255	23.0949
gi|472585116	RHTO_08035	385	arrestin domain protein	0.959619	16.7701	S	_SPLATANPIISPSTS(ph)NHDLR_	#DIV/0!	0.25156	0.431947	0.341753	37.3231
gi|472585116	RHTO_08035	80	arrestin domain protein	0.999999	59.0049	S	_AAS(ph)PAPPLSR_	0.667423	0.760225	1.08541	0.837686	26.2027
gi|472585116	RHTO_08035	381	arrestin domain protein	0.998614	29.6625	S	_SPLATANPIIS(ph)PSTS(ph)NHDLR_	0.596837	0.324391	0.431947	0.451058	30.4228
gi|472585116	RHTO_08035	72	arrestin domain protein	0.999765	36.2791	S	_AASLS(ph)RPGS(ph)R_	0.144607	0.253711	0.989707	0.462675	99.3509
gi|472585116	RHTO_08035	76	arrestin domain protein	1	75.3542	S	_AASLS(ph)RPGS(ph)R_	0.144607	0.441443	0.989707	0.525252	81.6252
gi|472586646	RHTO_06169	274	arrestin/PY protein 1	0.813537	6.45585	S	_IESSAS(ph)LS(ph)SLGAQPSGVSTPTTPGFNSPIHGSR_	#DIV/0!	0.420133	0.691898	0.556015	34.5614
gi|472586646	RHTO_06169	272	arrestin/PY protein 1	0.773456	6.46258	S	_IESS(ph)AS(ph)LSSLGAQPSGVSTPTTPGFNSPIHGSR_	#DIV/0!	0.353319	0.691898	0.522609	45.8108
gi|472586646	RHTO_06169	495	arrestin/PY protein 1	0.999697	36.0348	S	_TTPTGTPGIS(ph)PPAS(ph)RPPS(ph)RPAS(ph)PDRR_	3.64618	0.808604	1.248	1.90093	80.3457
gi|472586646	RHTO_06169	499	arrestin/PY protein 1	0.999999	65.0974	S	_TTPTGTPGIS(ph)PPAS(ph)RPPS(ph)RPAS(ph)PDRR_	3.64618	0.808604	1.23876	1.89785	80.5807
gi|472586646	RHTO_06169	503	arrestin/PY protein 1	1	66.6918	S	_TTPTGTPGIS(ph)PPAS(ph)RPPS(ph)RPAS(ph)PDRR_	3.64618	0.345937	1.23876	1.74362	97.9031
gi|472586646	RHTO_06169	544	arrestin/PY protein 1	0.775952	5.47094	T	_SSTPASPQPT(ph)SPPPEQQEHPEDHR_	1.64155	#DIV/0!	1.17806	1.40981	23.2467
gi|472586646	RHTO_06169	257	arrestin/PY protein 1	0.967463	14.7738	S	_YNFLDAPSARS(ph)S(ph)GANTPAPR_	1.10154	0.769408	0.677553	0.8495	26.2569
gi|472586646	RHTO_06169	258	arrestin/PY protein 1	0.984233	19.4791	S	_YNFLDAPSARS(ph)S(ph)GANTPAPR_	1.10154	0.769408	0.677553	0.8495	26.2569
gi|472586646	RHTO_06169	491	arrestin/PY protein 1	0.985822	18.7728	S	_TTPTGTPGIS(ph)PPAS(ph)RPPS(ph)RPAS(ph)PDRR_	0.655996	0.348979	1.248	0.750993	60.8499
gi|472586646	RHTO_06169	254	arrestin/PY protein 1	1	114.789	S	_YNFLDAPS(ph)AR_	0.565963	0.876655	1.17478	0.872467	34.8933
gi|472582647	RHTO_03561	86	arsenite-resistance protein 2	1	72.5834	S	_S(ph)IS(ph)PGGPPRGPPR_	4.9645	4.85649	3.3094	4.3768	21.1564
gi|472582647	RHTO_03561	415	arsenite-resistance protein 2	0.999166	30.7851	S	_AKS(ph)ESAPVEAAGEATTK_	2.7505	1.90647	1.56031	2.07243	29.5406
gi|472582647	RHTO_03561	84	arsenite-resistance protein 2	1	72.5834	S	_S(ph)IS(ph)PGGPPRGPPR_	2.72807	1.83432	2.73493	2.43244	21.2953
gi|472582647	RHTO_03561	305	arsenite-resistance protein 2	0.989326	20.6243	S	_KQAS(ph)PEGEDSSAPVVPAPIQVIK_	2.20332	1.41603	1.19464	1.60467	33.0373
gi|472581892	RHTO_04135	512	arylacetamide deacetylase-like 2	1	125.438	S	_STPTPGPAPIADKPS(ph)PR_	5.95274	4.74586	2.4031	4.36723	41.3273
gi|472584259	RHTO_01512	174	arylalkylamine N-acetyltransferase	1	105.846	S	_ADFADRPATAGVAES(ph)EEDEGEVR_	0.983381	0.959785	0.703235	0.882134	17.614
gi|472584711	RHTO_01051	31	asparaginyl-trna synthetase	0.947219	13.1591	S	_VIPHHHSRS(ph)NS(ph)NASS(ph)RAT(ph)S(ph)PAPGTK_	0.114739	#DIV/0!	0.0455664	0.0801529	61.0243
gi|472584711	RHTO_01051	30	asparaginyl-trna synthetase	0.947392	13.1591	T	_VIPHHHSRS(ph)NS(ph)NASS(ph)RAT(ph)S(ph)PAPGTK_	0.114739	#DIV/0!	0.0455664	0.0801529	61.0243
gi|472584711	RHTO_01051	23	asparaginyl-trna synthetase	0.901925	7.22708	S	_VIPHHHSRS(ph)NS(ph)NASS(ph)RAT(ph)S(ph)PAPGTK_	0.103744	#DIV/0!	0.770891	0.437318	107.872
gi|472584711	RHTO_01051	27	asparaginyl-trna synthetase	0.976465	16.1931	S	_VIPHHHS(ph)RSNS(ph)NAS(ph)S(ph)RAT(ph)SPAPGTK_	0.103744	#DIV/0!	0.770891	0.437318	107.872
gi|472584711	RHTO_01051	19	asparaginyl-trna synthetase	0.859686	6.4083	S	_VIPHHHS(ph)RSNS(ph)NAS(ph)S(ph)RAT(ph)SPAPGTK_	0.0937998	#DIV/0!	0.770891	0.432345	110.739
gi|472584711	RHTO_01051	26	asparaginyl-trna synthetase	0.946975	10.8643	S	_VIPHHHS(ph)RSNS(ph)NAS(ph)S(ph)RAT(ph)SPAPGTK_	0.0937998	#DIV/0!	0.770891	0.432345	110.739
gi|472581317	RHTO_05433	351	asteroid homolog 1	0.985574	15.9232	Y	_AIY(ph)DAAYKS(ph)SRLS(ph)SFVLHVLK_	1.95099	0.92816	1.12051	1.33322	40.772
gi|472581317	RHTO_05433	361	asteroid homolog 1	0.999215	34.1816	S	_AIY(ph)DAAYKS(ph)SRLS(ph)SFVLHVLK_	1.95099	0.92816	1.12051	1.33322	40.772
gi|472581317	RHTO_05433	355	asteroid homolog 1	0.792285	5.81915	Y	_AIY(ph)DAAY(ph)KSSRLS(ph)SFVLHVLK_	1.93061	#DIV/0!	1.12051	1.52556	37.5487
gi|472582176	RHTO_03915	499	ATP citrate synthase	1	79.3512	S	_AAADATGTLTPVPGS(ph)PK_	5.46956	3.47548	2.8319	3.92565	35.0324
gi|472582176	RHTO_03915	512	ATP citrate synthase	0.808684	6.70975	S	_AAQLPTGAS(ph)TPSR_	2.36658	#DIV/0!	1.48812	1.92735	32.2292
gi|472582176	RHTO_03915	513	ATP citrate synthase	0.999556	33.9223	T	_AAQLPTGAST(ph)PSR_	2.35805	1.42974	1.17242	1.6534	37.7197
gi|472582176	RHTO_03915	494	ATP citrate synthase	1	78.4126	T	_AAADATGTLT(ph)PVPGS(ph)PK_	1.74831	2.24427	1.8319	1.94149	13.676
gi|472580957	RHTO_05648	497	ATP synthase subunit alpha	0.996617	24.7005	T	_LISPFAHVS(ph)T(ph)SR_	0.382132	#DIV/0!	0.432264	0.407198	8.70563
gi|472580957	RHTO_05648	496	ATP synthase subunit alpha	0.996627	24.7005	S	_LISPFAHVS(ph)T(ph)SR_	0.382132	#DIV/0!	0.432264	0.407198	8.70563
gi|472584524	RHTO_00864	966	ATP-binding cassette transporter	0.79907	6.18641	S	_ADGVLSTS(ph)PK_	5.37634	4.86784	2.13033	4.12484	42.3266
gi|472584894	RHTO_00748	869	ATP-binding cassette, subfamily B (MDR/TAP), member 1	0.965677	14.4924	T	_TGT(ph)GRS(ph)LAS(ph)QAIER_	#DIV/0!	2.00489	2.70088	2.35288	20.9163
gi|472584894	RHTO_00748	872	ATP-binding cassette, subfamily B (MDR/TAP), member 1	0.999998	56.7961	S	_TGT(ph)GRS(ph)LAS(ph)QAIER_	#DIV/0!	2.00489	2.70088	2.35288	20.9163
gi|472584894	RHTO_00748	875	ATP-binding cassette, subfamily B (MDR/TAP), member 1	1	75.3452	S	_SLAS(ph)QAIER_	#DIV/0!	6.35607	5.68666	6.02137	7.86099
gi|472584314	RHTO_01122	49	ATP-binding cassette, sub-family F, member 2	0.99856	28.4264	S	_ASTPLTSS(ph)ANGS(ph)VEDLSSMAK_	0.654793	0.580821	0.470146	0.568587	16.344
gi|472584314	RHTO_01122	45	ATP-binding cassette, sub-family F, member 2	0.873531	8.73359	S	_ASTPLTSS(ph)ANGS(ph)VEDLSSMAK_	0.654793	#DIV/0!	0.466027	0.56041	23.8179
gi|472583720	RHTO_01810	815	ATP-binding cassette, subfamily G (WHITE), member 2, PDR	0.959838	13.7832	T	_VGNDVEAGAST(ph)PQDS(ph)RNEDPAKDVNIQR_	3.50926	2.49085	2.02651	2.67554	28.3471
gi|472583720	RHTO_01810	819	ATP-binding cassette, subfamily G (WHITE), member 2, PDR	0.99985	38.067	S	_VGNDVEAGAST(ph)PQDS(ph)RNEDPAKDVNIQR_	3.50926	2.49085	#DIV/0!	3.00006	24.0039
gi|472582450	RHTO_03670	354	ATP-dependent DNA helicase	1	90.4674	T	_VRPTTVVKEPS(ph)PPPVEEEEQAPT(ph)EEELAEQK_	1.65659	0.902853	1.01677	1.19207	34.0834
gi|472582450	RHTO_03670	442	ATP-dependent DNA helicase	1	78.709	S	_LARS(ph)PS(ph)PAAPASPPAPLYR_	1.33636	1.11485	0.946611	1.13261	17.2594
gi|472582450	RHTO_03670	444	ATP-dependent DNA helicase	1	130.81	S	_LARS(ph)PS(ph)PAAPAS(ph)PPAPLYR_	1.33636	1.19036	0.99691	1.17454	14.4974
gi|472582450	RHTO_03670	450	ATP-dependent DNA helicase	0.999997	55.6716	S	_LARS(ph)PS(ph)PAAPAS(ph)PPAPLYR_	0.569963	1.04412	0.898876	0.837655	29.0021
gi|472582450	RHTO_03670	342	ATP-dependent DNA helicase	0.999586	36.9718	S	_VRPTTVVKEPS(ph)PPPVEEEEQAPT(ph)EEELAEQK_	0.565995	0.392495	0.447327	0.468606	18.9254
gi|472586491	RHTO_06014	17	ATP-dependent DNA helicase 2 subunit 1	1	72.0455	S	_YDEWTAGVDS(ph)DDEDDLQEDYR_	2.20493	#DIV/0!	0.600817	1.40287	80.8539
gi|472586536	RHTO_06059	1362	ATP-dependent DNA helicase Hrp3	0.999663	34.7223	S	_AGS(ph)SAPRPK_	0.545316	0.743494	0.87512	0.72131	23.0161
gi|472586536	RHTO_06059	1552	ATP-dependent DNA helicase Hrp3	0.999107	32.7804	S	_TTS(ph)GTDLPSFSR_	0.360153	0.305549	#DIV/0!	0.332851	11.6
gi|472582842	RHTO_03432	1396	ATP-dependent RNA helicase A	0.994961	26.0355	S	_ASTRPSSPS(ph)GLRPLQQAR_	1.19195	0.533248	0.630756	0.785319	45.27
gi|472582078	RHTO_04072	463	ATP-dependent rna helicase dhx8	1	102.97	S	_RALELS(ph)PVK_	0.430071	1.10873	0.959141	0.832648	42.8243
gi|472584253	RHTO_01506	45	ATP-dependent rna helicase dob1	1	94.6706	S	_RPLS(ph)PAS(ph)EHAPVDQEVLKK_	1.5332	1.01146	0.90212	1.14893	29.3536
gi|472584253	RHTO_01506	48	ATP-dependent rna helicase dob1	1	94.6706	S	_RPLS(ph)PAS(ph)EHAPVDQEVLKK_	1.21911	1.04707	0.829669	1.03195	18.9118
gi|472587124	RHTO_04802	74	ATP-dependent rna helicase drs1	1	89.4299	T	_KLLDTVVDADDDEDT(ph)PVDS(ph)PRGGAADEEVR_	1.41341	1.29671	1.06299	1.2577	14.1873
gi|472587124	RHTO_04802	78	ATP-dependent rna helicase drs1	1	99.5116	S	_KLLDTVVDADDDEDT(ph)PVDS(ph)PRGGAADEEVR_	1.25169	1.02161	1.04379	1.10569	11.4788
gi|472580295	RHTO_06691	53	baculoviral IAP repeat-containing protein 6 (apollon)	1	145.856	S	_RAS(ph)S(ph)PGLEVR_	2.50294	1.36335	1.48664	1.78431	35.0501
gi|472582500	RHTO_03720	330	BAR adaptor protein	0.999603	34.0061	S	_SSS(ph)FLER_	0.921404	0.719528	1.5063	1.04908	38.9511
gi|472585185	RHTO_08104	307	BAR adaptor protein	0.963972	15.8092	S	_ASSTYSSS(ph)SLGR_	0.276182	0.165626	#DIV/0!	0.220904	35.3887
gi|472585185	RHTO_08104	302	BAR adaptor protein	0.999801	37.3004	S	_ASS(ph)TYSSSSLGR_	0.169093	0.925326	0.344234	0.479551	82.548
gi|472582864	RHTO_03454	21	base-excision DNA repair protein	0.97558	16.5052	T	_SSS(ph)AT(ph)PPPSSTPTADEDKPKPTLPASALK_	1.82272	2.16029	1.30765	1.76356	24.3479
gi|472582498	RHTO_03718	599	B-block binding subunit of TFIIIC family protein	1	57.7376	S	_KAAAIEAADGVEQPADGAADEVEEDGS(ph)PPPKR_	2.25841	1.3484	1.44298	1.68326	29.7238
gi|472582498	RHTO_03718	1537	B-block binding subunit of TFIIIC family protein	0.999999	57.9771	S	_QAT(ph)PAKEPAEEADEEEDEEAAGS(ph)PLPAQEPLPAEGRT(ph)TPLPFR_	1.96075	2.01796	0.695701	1.55814	47.97
gi|472582498	RHTO_03718	1023	B-block binding subunit of TFIIIC family protein	0.99999	49.8228	S	_YEVQPDLVVM(ox)S(ph)DEDVPTKEK_	1.5429	1.47774	#DIV/0!	1.51032	3.0508
gi|472582767	RHTO_03357	147	B-cell receptor-associated protein 31	0.981186	17.8482	T	_AQAT(ph)GSPSAEAAADPDKR_	3.62437	#DIV/0!	2.00465	2.81451	40.6932
gi|472582767	RHTO_03357	151	B-cell receptor-associated protein 31	0.990658	21.6035	S	_AQATGSPS(ph)AEAAADPDKR_	3.43289	3.17219	2.06411	2.88973	25.1508
gi|472585100	RHTO_08019	226	BDF1	1	69.6358	S	_EGS(ph)PGVSVQAADDGPANPVPPTQGGTLKR_	1.84233	0.465224	0.840124	1.04923	67.8565
gi|472584962	RHTO_00816	185	Bestrophin/UPF0187 family protein	0.843583	8.46731	S	_SRPS(ph)ISADPSFVQHSK_	0.904732	1.15233	#DIV/0!	1.02853	17.0219
gi|472585780	RHTO_07673	346	beta-ala-his dipeptidase	1	66.6444	S	_RGS(ph)GDS(ph)LNTLGK_	1.09389	#DIV/0!	0.862738	0.978313	16.7071
gi|472585780	RHTO_07673	349	beta-ala-his dipeptidase	0.999642	34.4609	S	_RGS(ph)GDS(ph)LNTLGK_	0.312842	0.85918	1.10401	0.758677	53.3884
gi|472586864	RHTO_06387	113	binuclear zinc transcription factor	0.980537	17.4607	S	_RLAEVSSPQGS(ph)PS(ph)PTATGLTTASR_	2.13061	1.20499	1.1894	1.50833	35.7322
gi|472586864	RHTO_06387	111	binuclear zinc transcription factor	0.997908	30.6805	S	_RLAEVSSPQGS(ph)PS(ph)PTATGLTTASR_	2.13061	1.20499	1.45151	1.5957	30.0406
gi|472581957	RHTO_04200	468	BRCA1-associated protein	0.999999	61.2722	S	_LRPSAAS(ph)PGDR_	0.689037	0.763301	0.716897	0.723078	5.18829
gi|472588567	RHTO_00467	629	BRCT domain containing protein	1	88.2043	S	_TAVDLLLGDDS(ph)PEQDR_	2.63498	1.88062	1.8315	2.1157	21.2874
gi|472588567	RHTO_00467	770	BRCT domain containing protein	0.970502	15.1727	S	_SKAPEQTS(ph)PAPAPK_	2.40842	1.24966	1.13899	1.59902	43.9731
gi|472587561	RHTO_02784	949	BRCT domain containing protein	0.997577	27.0216	S	_SAGTAIS(ph)PS(ph)PEPAAPVAGPSR_	1.39719	1.09085	1.07228	1.18677	15.3749
gi|472587561	RHTO_02784	951	BRCT domain containing protein	0.999979	47.5486	S	_SAGTAIS(ph)PS(ph)PEPAAPVAGPSR_	1.39719	1.09085	1.07228	1.18677	15.3749
gi|472587561	RHTO_02784	968	BRCT domain containing protein	0.998697	28.844	S	_LRFQS(ph)VEEDVSR_	1.16709	#DIV/0!	0.819874	0.993483	24.7131
gi|472588567	RHTO_00467	1098	BRCT domain containing protein	0.970793	14.4295	S	_KAAPATIM(ox)IDDDDSDS(ph)DS(ph)GLTFK_	1.01748	1.48122	0.733837	1.07751	35.0149
gi|472588567	RHTO_00467	1096	BRCT domain containing protein	0.984883	17.1231	S	_KAAPATIM(ox)IDDDDS(ph)DS(ph)DSGLTFK_	1.01748	1.30208	0.733837	1.0178	27.9154
gi|472588567	RHTO_00467	1100	BRCT domain containing protein	0.776172	5.32548	S	_KAAPATIM(ox)IDDDDSDS(ph)DS(ph)GLTFK_	1.01748	1.40517	#DIV/0!	1.21132	22.631
gi|472583270	RHTO_02308	311	Bromodomain and PHD finger domain containing protein 3	1	95.75	S	_DGS(ph)PFPILSK_	0.919033	0.785978	1.49182	1.06561	35.1965
gi|472585369	RHTO_07793	296	Bromodomain-containing protein	1	75.1736	S	_KVS(ph)EPPAAS(ph)PPPGAADDGGRK_	2.44672	#DIV/0!	1.27849	1.86261	44.3497
gi|472585369	RHTO_07793	302	Bromodomain-containing protein	1	75.1736	S	_KVS(ph)EPPAAS(ph)PPPGAADDGGRK_	1.41427	1.08652	0.971628	1.15747	19.8442
gi|472580449	RHTO_06550	271	BSD domain protein	0.974913	15.8952	S	_TS(ph)LEGAAM(ox)NR_	#DIV/0!	0.908265	5.7346	3.32143	102.749
gi|472580449	RHTO_06550	30	BSD domain protein	0.813462	8.93075	S	_TSTPTPAQPEPES(ph)PTRQALTAAQGLEK_	29.4759	#DIV/0!	0.365631	14.9208	137.956
gi|472581895	RHTO_04138	643	BTB domain and ankyrin repeat containing protein	0.936691	11.702	S	_RTAGEDS(ph)DDEDDTDAVIERDIEVAR_	0.846812	#DIV/0!	0.679671	0.763241	15.4848
gi|472586391	RHTO_06978	120	bud emergence protein 1	0.947281	13.7097	S	_KLS(ph)SGSM(ox)SSGK_	#DIV/0!	1.47682	0.496549	0.986685	70.2511
gi|472584660	RHTO_01000	378	BUD22 family protein	1	91.5895	S	_RQPS(ph)LS(ph)PT(ph)PPPRPAK_	1.21405	0.973899	0.850774	1.01291	18.2398
gi|472584660	RHTO_01000	380	BUD22 family protein	1	91.5895	S	_RQPS(ph)LS(ph)PT(ph)PPPRPAK_	1.21405	0.973899	0.850774	1.01291	18.2398
gi|472584660	RHTO_01000	382	BUD22 family protein	1	91.5895	T	_RQPS(ph)LS(ph)PT(ph)PPPRPAK_	1.21405	0.973899	0.850774	1.01291	18.2398
gi|472586268	RHTO_06855	67	bZIP transcription factor	0.914481	12.4273	T	_ARS(ph)T(ph)SPSALLPR_	2.21053	1.27058	1.00503	1.49538	42.358
gi|472586268	RHTO_06855	66	bZIP transcription factor	0.997064	28.6851	S	_ARS(ph)T(ph)SPSALLPR_	2.16427	1.27058	1.00503	1.47996	41.0364
gi|472581548	RHTO_05229	366	C-5 sterol desaturase	0.958093	13.5708	S	_RIDS(ph)GLGS(ph)ETELGLPGSGSSSK_	#DIV/0!	0.454298	0.722543	0.588421	32.2352
gi|472581548	RHTO_05229	362	C-5 sterol desaturase	0.995498	23.2596	S	_RIDS(ph)GLGS(ph)ETELGLPGSGSSSK_	0.649519	#DIV/0!	0.834934	0.742226	17.6641
gi|472585211	RHTO_08130	204	C6 transcription factor	0.999797	36.9175	S	_RS(ph)ENEVGPESDPAYLEQLER_	#DIV/0!	3.9968	2.06139	3.0291	45.18
gi|472580783	RHTO_05808	91	C6 transcription factor	0.999996	53.8862	S	_TSGVFDGTDDGS(ph)PGAEGDGIPAR_	3.65938	1.64512	1.43618	2.24689	54.6401
gi|472584851	RHTO_00705	130	C6 transcription factor	0.999621	34.213	S	_ASS(ph)LEPLR_	2.76778	2.70497	2.96217	2.81164	4.76924
gi|472580882	RHTO_05752	340	C6 transcription factor	0.999891	39.769	S	_GRPGAPS(ph)PLSQTEAGWDR_	2.24992	1.91545	#DIV/0!	2.08269	11.3558
gi|472583952	RHTO_01628	75	C6 transcription factor	0.941748	12.5629	T	_RAT(ph)PVDEPSAPIASTSTAVAPASGPSPTGKSEEDEDEAPVVVR_	1.59243	2.26613	1.07567	1.64475	36.2945
gi|472584851	RHTO_00705	108	C6 transcription factor	0.816634	7.40439	S	_DVS(ph)RASS(ph)LTPLSASPSVAPTTSRPTR_	0.337735	1.18999	#DIV/0!	0.763865	78.8933
gi|472584851	RHTO_00705	104	C6 transcription factor	0.987589	18.1202	S	_DVS(ph)RASS(ph)LTPLSASPSVAPTTSRPTR_	0.337735	1.18999	#DIV/0!	0.763865	78.8933
gi|472585784	RHTO_07677	293	Ca2+:H+ antiporter	1	86.243	S	_RGVQSAAGS(ph)DDDEVVTR_	4.53597	2.7398	2.92646	3.40074	29.0394
gi|472583490	RHTO_01994	1365	Ca2+-transporting ATPase	1	74.7687	S	_GLGQLQPM(ox)S(ph)PR_	1.52497	#DIV/0!	0.980681	1.25283	30.7203
gi|472586907	RHTO_04584	212	calcineurin temperature suppressor Cts1	0.979333	16.7788	S	_KTSVAES(ph)PTR_	7.11794	2.3663	2.7866	4.09028	64.3095
gi|472586907	RHTO_04584	208	calcineurin temperature suppressor Cts1	0.97738	16.4151	S	_KTS(ph)VAESPTR_	2.07628	1.22966	#DIV/0!	1.65297	36.2165
gi|472586907	RHTO_04584	9	calcineurin temperature suppressor Cts1	0.998384	28.805	S	_VQLPPPPS(ph)PTSGER_	1.83557	1.65311	1.62135	1.70334	6.78707
gi|472588263	RHTO_00163	1349	calcium channel subunit Cch1	1	76.2879	S	_IVQPPPS(ph)PLEPPSR_	0.666489	0.467574	0.834934	0.656332	28.0179
gi|472588263	RHTO_00163	1383	calcium channel subunit Cch1	1	90.2424	T	_KDT(ph)VAEFIEEHPSYDR_	0.505357	0.997108	#DIV/0!	0.751233	46.2867
gi|472584478	RHTO_01287	641	calcium ion binding membrane protein	0.999142	30.6709	S	_SES(ph)GGSILDSIR_	2.09644	0.357015	0.795102	1.08285	83.5486
gi|472587948	RHTO_03173	46	calcium:hydrogen antiporter	0.999973	45.7295	S	_LPS(ph)PLS(ph)SPSR_	8.85347	4.13479	5.81362	6.26729	38.1637
gi|472587948	RHTO_03173	50	calcium:hydrogen antiporter	0.998864	31.4179	S	_LPS(ph)PLSS(ph)PSR_	5.81971	4.13479	3.68283	4.54578	24.7737
gi|472587948	RHTO_03173	14	calcium:hydrogen antiporter	0.99323	22.8029	S	_HPGS(ph)DESTPLIGR_	4.40141	2.54317	#DIV/0!	3.47229	37.8417
gi|472587948	RHTO_03173	64	calcium:hydrogen antiporter	0.899971	8.93775	S	_STSRPS(ph)PVGPS(ph)SPDPR_	4.3482	6.46037	#DIV/0!	5.40428	27.6359
gi|472587948	RHTO_03173	49	calcium:hydrogen antiporter	0.992523	18.2463	S	_LPS(ph)PLS(ph)S(ph)PSR_	3.89029	6.31792	3.5926	4.60027	32.4971
gi|472587895	RHTO_03119	32	calcium-binding EF-hand domain-containing protein	1	131.325	S	_APVVDEDDS(ph)S(ph)PPPAPVKK_	1.53001	1.24867	0.980488	1.25306	21.9294
gi|472587895	RHTO_03119	33	calcium-binding EF-hand domain-containing protein	1	131.325	S	_APVVDEDDS(ph)S(ph)PPPAPVKK_	1.53001	0.268125	0.980488	0.926208	68.3099
gi|472588562	RHTO_00462	200	calnexin	1	117.52	S	_HLAAPPS(ph)PK_	2.73239	2.13972	2.09802	2.32338	15.2721
gi|472587322	RHTO_05001	255	cAMP-independent regulatory protein	0.986319	18.579	S	_YKGEADAPLS(ph)PLTR_	2.73299	#DIV/0!	1.61036	2.17167	36.5533
gi|472586335	RHTO_06922	200	cAMP-independent regulatory protein pac2	0.989705	22.4045	S	_SQS(ph)SLVDIGSATRPVGGAVTEK_	0.128044	0.176994	0.168132	0.157724	16.5367
gi|472586478	RHTO_06001	888	CAP-Gly domain-containing protein	0.867518	8.23187	T	_EASS(ph)LPT(ph)SPSSDSSLRR_	#DIV/0!	0.513637	0.745545	0.629591	26.0461
gi|472586478	RHTO_06001	885	CAP-Gly domain-containing protein	0.886045	9.00504	S	_EASS(ph)LPT(ph)SPSSDSSLRR_	1.24715	0.524576	0.745545	0.83909	44.126
gi|472586478	RHTO_06001	889	CAP-Gly domain-containing protein	0.753983	5.60356	S	_EASS(ph)LPTS(ph)PSSDSSLRR_	1.07212	0.535791	#DIV/0!	0.803956	47.1721
gi|472586478	RHTO_06001	804	CAP-Gly domain-containing protein	0.901653	9.67745	S	_RTS(ph)VASSR_	0.768049	#DIV/0!	0.76864	0.768344	0.0543301
gi|472586420	RHTO_07007	50	capsular associated protein, glycosyltransferase family 90 protein	1	121.194	S	_TDHSAIPVNLSTTPIIS(ph)PPPS(ph)PDAER_	1.81752	1.46336	1.25272	1.5112	18.8871
gi|472586420	RHTO_07007	46	capsular associated protein, glycosyltransferase family 90 protein	1	77.725	S	_TDHSAIPVNLSTTPIIS(ph)PPPS(ph)PDAER_	0.522958	0.411692	1.41423	0.782959	70.1847
gi|472581047	RHTO_05549	1957	carbamoyl-phosphate synthase / aspartate carbamoyltransferase	0.997075	25.3266	S	_LASARS(ph)PR_	0.372828	0.192972	0.335042	0.300281	31.5815
gi|472583188	RHTO_02458	736	Carbohydrate-Binding Module Family 48 protein, glycogen-binding	0.999999	58.2506	S	_QALGAASGRDES(ph)PSPS(ph)INS(ph)GKEK_	3.32889	2.80018	1.49526	2.54144	37.1364
gi|472583188	RHTO_02458	731	Carbohydrate-Binding Module Family 48 protein, glycogen-binding	0.954396	13.6372	S	_QALGAASGRDES(ph)PS(ph)PSINSGK_	0.643832	1.23528	1.5108	1.12997	39.2023
gi|472583188	RHTO_02458	729	Carbohydrate-Binding Module Family 48 protein, glycogen-binding	0.999978	48.2917	S	_QALGAASGRDES(ph)PS(ph)PSINSGK_	0.493998	1.31537	0.539782	0.783051	58.9454
gi|472583188	RHTO_02458	733	Carbohydrate-Binding Module Family 48 protein, glycogen-binding	0.999951	43.0189	S	_QALGAASGRDES(ph)PSPS(ph)INS(ph)GKEK_	0.292946	2.66624	0.96637	1.30852	93.4708
gi|472587301	RHTO_04980	239	carbonate dehydratase	0.999999	61.5659	S	_ADSLSRPSTYAES(ph)EPRE_	1.65205	1.20678	1.15367	1.3375	20.4634
gi|472587771	RHTO_02995	579	catabolite repression protein creC	0.997999	26.4698	S	_RHS(ph)ASS(ph)QVS(ph)LNRR_	0.900657	1.14725	0.841963	0.96329	16.8167
gi|472587771	RHTO_02995	582	catabolite repression protein creC	0.96013	12.9666	S	_RHS(ph)ASS(ph)QVS(ph)LNR_	0.821558	1.14725	0.841963	0.936924	19.4715
gi|472587771	RHTO_02995	585	catabolite repression protein creC	0.999975	44.9999	S	_RHS(ph)ASS(ph)QVS(ph)LNR_	0.821558	1.14725	#DIV/0!	0.984404	23.3948
gi|472581955	RHTO_04198	539	Cation efflux protein, zinc transporter	0.995157	23.1276	S	_SNS(ph)TPFLVK_	0.410374	#DIV/0!	0.856678	0.633526	49.8139
gi|472585559	RHTO_07452	1035	Cation/H+ exchanger	0.841238	7.2486	S	_S(ph)HSPEPM(ox)AQLSSGAGPSSDK_	1.97258	2.25601	1.20786	1.81215	29.9191
gi|472588266	RHTO_00166	297	cation-dependent mannose-6-phosphate receptor	0.999109	31.7367	S	_SGPNPPAPPAKS(ph)PPPQAHNPLAGGGSLLEDDEDDEDEEAK_	3.35661	3.16186	2.87051	3.12966	7.81688
gi|472588266	RHTO_00166	262	cation-dependent mannose-6-phosphate receptor	1	78.2728	S	_ASTDYNYNYQPAPAS(ph)PQHR_	1.91161	1.40042	1.09129	1.46777	28.2256
gi|472588266	RHTO_00166	311	cation-dependent mannose-6-phosphate receptor	1	81.9153	S	_SPPPQAHNPLAGGGS(ph)LLEDDEDDEDEEAK_	1.55904	1.64636	1.98535	1.73025	13.0151
gi|472585909	RHTO_07185	503	CBS and PB1 domain containing protein	0.973462	18.0424	T	_SKDS(ph)IDT(ph)PGS(ph)ELYPNDSASVIHDDGASDLAPAPR_	#DIV/0!	1.06964	1.64012	1.35488	29.773
gi|472585909	RHTO_07185	515	CBS and PB1 domain containing protein	0.839597	6.24064	S	_SKDSIDTPGSELYPNDSAS(ph)VIHDDGAS(ph)DLAPAPR_	3.61363	1.02183	1.32843	1.98796	71.2384
gi|472585909	RHTO_07185	523	CBS and PB1 domain containing protein	0.999647	34.5718	S	_SKDSIDTPGSELYPNDSASVIHDDGAS(ph)DLAPAPR_	2.95526	2.53846	1.68345	2.39239	27.1012
gi|472585909	RHTO_07185	506	CBS and PB1 domain containing protein	0.940445	15.1748	S	_SKDSIDTPGS(ph)ELYPNDSASVIHDDGASDLAPAPR_	2.85437	0.9996	1.05876	1.63758	64.3749
gi|472585909	RHTO_07185	500	CBS and PB1 domain containing protein	0.823727	6.81021	S	_SKDS(ph)IDT(ph)PGS(ph)ELYPNDSASVIHDDGASDLAPAPR_	2.46378	0.9996	1.79511	1.75283	41.8184
gi|472585909	RHTO_07185	596	CBS and PB1 domain containing protein	1	123.344	S	_LSSDPFFAEQS(ph)EDEALPK_	2.13479	1.8786	1.3823	1.79857	21.2711
gi|472585909	RHTO_07185	509	CBS and PB1 domain containing protein	0.94119	12.5323	Y	_SKDSIDTPGSELY(ph)PNDSASVIHDDGASDLAPAPR_	1.28164	#DIV/0!	1.96572	1.62368	29.7913
gi|472587323	RHTO_05002	1156	CCAAT-box-binding transcription factor	1	142.186	S	_HLPTFASAEDYAHLLGDS(ph)DNDA_	1.38249	0.932836	0.953652	1.08966	23.293
gi|472583487	RHTO_01991	88	CCCH zinc finger and SMR domain containing protein	0.826511	8.70461	S	_SVSS(ph)S(ph)GKSAAEDLPDDEKTR_	1.01936	0.402771	0.606208	0.676112	46.4688
gi|472583487	RHTO_01991	92	CCCH zinc finger and SMR domain containing protein	0.980618	17.0194	S	_SVSS(ph)SGKS(ph)AAEDLPDDEKTR_	1.01936	0.402771	#DIV/0!	0.711064	61.3155
gi|472583770	RHTO_01860	1434	CCR4-NOT transcription complex subunit 1	0.999816	37.3458	S	_ELS(ph)PSNLTSAEDAAVR_	#DIV/0!	1.66792	1.26776	1.46784	19.2767
gi|472585335	RHTO_07759	197	CCR4-NOT transcription complex subunit 2	0.783133	5.60237	S	_ATAS(ph)PGGQEQASALAALQAQQQHR_	1.60893	1.31851	#DIV/0!	1.46372	14.0298
gi|472585335	RHTO_07759	26	CCR4-NOT transcription complex subunit 2	0.999999	61.1791	S	_QAS(ph)GTPS(ph)SPTALAR_	0.253473	0.875427	0.688137	0.605679	52.6799
gi|472583136	RHTO_02406	325	CCR4-NOT transcription complex subunit 3	0.770434	5.25831	T	_SVSGPAAST(ph)PQPR_	0.557631	0.309406	#DIV/0!	0.433519	40.4877
gi|472586601	RHTO_06124	405	CCR4-NOT transcription complex subunit 4	0.892556	9.19454	S	_TISVPKPQNHPLPARPSS(ph)R_	#DIV/0!	2.25134	1.32484	1.78809	36.6389
gi|472586601	RHTO_06124	710	CCR4-NOT transcription complex subunit 4	0.999591	37.9341	S	_NLAS(ph)PSASATSSPQLS(ph)PR_	0.858222	0.575639	0.610054	0.681305	22.6298
gi|472586601	RHTO_06124	722	CCR4-NOT transcription complex subunit 4	0.999998	62.1502	S	_NLASPSASATSS(ph)PQLS(ph)PR_	0.795165	0.808211	0.903587	0.835655	7.08329
gi|472586601	RHTO_06124	595	CCR4-NOT transcription complex subunit 4	0.992607	21.5605	S	_SGS(ph)PTPPSTAEDELSRR_	0.750244	1.20191	0.432171	0.794774	48.6674
gi|472586601	RHTO_06124	718	CCR4-NOT transcription complex subunit 4	0.996027	25.0213	S	_NLASPSASATSS(ph)PQLS(ph)PR_	0.736703	0.980008	0.945448	0.887386	14.834
gi|472586601	RHTO_06124	597	CCR4-NOT transcription complex subunit 4	0.997074	26.3879	T	_S(ph)GSPT(ph)PPSTAEDELSRR_	0.72223	1.2587	#DIV/0!	0.990466	38.2994
gi|472586601	RHTO_06124	455	CCR4-NOT transcription complex subunit 4	0.756087	6.17101	T	_M(ox)SEAEESAEQRPAEPVAST(ph)SRS(ph)PSPSPTR_	0.202286	#DIV/0!	0.696233	0.44926	77.7443
gi|472586601	RHTO_06124	458	CCR4-NOT transcription complex subunit 4	0.924204	10.8839	S	_M(ox)SEAEESAEQRPAEPVAST(ph)SRS(ph)PS(ph)PSPTR_	0.202286	#DIV/0!	0.685025	0.443656	76.9399
gi|472584995	RHTO_00849	202	CCR4-NOT transcription complex subunit 6	0.994947	23.0801	S	_AQTTSSAIPITDPNRPGS(ph)VILGSK_	0.359376	0.523122	#DIV/0!	0.441249	26.2405
gi|472588504	RHTO_00404	1282	CCR4-NOT transcriptional complex subunit CAF120	0.929356	14.2309	S	_QHPYPHTAPPAS(ph)PTRDFDAEAGQQTSR_	#DIV/0!	2.53537	1.82906	2.18221	22.8868
gi|472588504	RHTO_00404	1092	CCR4-NOT transcriptional complex subunit CAF120	0.985509	18.4461	S	_HDM(ox)FRPPT(ph)PS(ph)DENYGSDAK_	#DIV/0!	4.29812	3.13136	3.71474	22.2094
gi|472588504	RHTO_00404	1090	CCR4-NOT transcriptional complex subunit CAF120	0.994973	23.155	T	_HDM(ox)FRPPT(ph)PS(ph)DENYGSDAK_	#DIV/0!	4.29812	3.13136	3.71474	22.2094
gi|472588504	RHTO_00404	1252	CCR4-NOT transcriptional complex subunit CAF120	1	71.8718	S	_QGRS(ph)PQRS(ph)PGVDPVAR_	#DIV/0!	2.65393	1.87635	2.26514	24.2736
gi|472588504	RHTO_00404	1593	CCR4-NOT transcriptional complex subunit CAF120	1	85.845	S	_AVS(ph)PLDLGR_	5.48486	5.41682	2.53203	4.47791	37.6408
gi|472588504	RHTO_00404	1005	CCR4-NOT transcriptional complex subunit CAF120	0.999871	40.0296	T	_RAQT(ph)PPPVEAPTASAAAPAHAS(ph)PNKR_	2.74816	1.07558	1.36788	1.73054	51.621
gi|472588504	RHTO_00404	1023	CCR4-NOT transcriptional complex subunit CAF120	0.999915	41.8826	S	_RAQT(ph)PPPVEAPTASAAAPAHAS(ph)PNKR_	2.74816	1.07558	1.12878	1.65084	57.5875
gi|472588504	RHTO_00404	734	CCR4-NOT transcriptional complex subunit CAF120	1	106.143	S	_RPS(ph)RDAS(ph)T(ph)AENELGTYEAFLSSDIAR_	1.17375	#DIV/0!	1.30387	1.23881	7.42695
gi|472588504	RHTO_00404	738	CCR4-NOT transcriptional complex subunit CAF120	1	106.143	S	_RPS(ph)RDAS(ph)T(ph)AENELGTYEAFLSSDIAR_	1.17375	#DIV/0!	1.30387	1.23881	7.42695
gi|472588504	RHTO_00404	739	CCR4-NOT transcriptional complex subunit CAF120	1	106.143	T	_RPS(ph)RDAS(ph)T(ph)AENELGTYEAFLSSDIAR_	1.17375	#DIV/0!	1.30387	1.23881	7.42695
gi|472588504	RHTO_00404	138	CCR4-NOT transcriptional complex subunit CAF120	0.894232	9.0552	S	_EGSSITPQTTRPTSQLPSHGS(ph)S(ph)R_	0.680643	0.873515	1.07064	0.874933	22.2878
gi|472588504	RHTO_00404	55	CCR4-NOT transcriptional complex subunit CAF120	0.795635	5.90306	S	_QSS(ph)YGLPPPINTQDPR_	0.473238	0.618697	#DIV/0!	0.545968	18.839
gi|472588504	RHTO_00404	141	CCR4-NOT transcriptional complex subunit CAF120	0.999992	50.7732	S	_S(ph)LAS(ph)QAAPQTIAGEPLHDLGR_	0.438327	#DIV/0!	0.727167	0.582747	35.0479
gi|472588504	RHTO_00404	384	CCR4-NOT transcriptional complex subunit CAF120	0.799407	6.00508	S	_RSS(ph)LLSFGGK_	0.234797	0.786287	0.318329	0.446471	66.575
gi|472582448	RHTO_03668	683	cell cycle arrest in response to pheromone-related protein	0.829278	5.86306	T	_KRSS(ph)LT(ph)PVPPSTSASSALPR_	#DIV/0!	0.365377	0.257898	0.311638	24.387
gi|472582448	RHTO_03668	713	cell cycle arrest in response to pheromone-related protein	0.999975	46.0318	S	_SIGGGLAS(ph)DS(ph)DS(ph)T(ph)IGEVSGR_	1.70407	1.60097	0.747272	1.35077	38.8801
gi|472582448	RHTO_03668	711	cell cycle arrest in response to pheromone-related protein	0.999981	46.5207	S	_SIGGGLAS(ph)DS(ph)DS(ph)TIGEVSGR_	1.70407	0.894775	0.596374	1.06507	53.8131
gi|472582448	RHTO_03668	681	cell cycle arrest in response to pheromone-related protein	0.829278	5.86306	S	_KRSS(ph)LT(ph)PVPPSTSASSALPR_	0.488568	0.365377	0.257898	0.370614	31.1439
gi|472581784	RHTO_04273	91	cell cycle control protein, Cwf19	1	78.7803	S	_GEEDDENEWVEKAPS(ph)PGAQQQK_	5.64685	3.14792	2.56082	3.7852	43.2935
gi|472581784	RHTO_04273	290	cell cycle control protein, Cwf19	1	96.0589	S	_RES(ph)GFGGGPPR_	0.144117	0.303223	#DIV/0!	0.22367	50.2995
gi|472587725	RHTO_02949	39	cell cycle control protein, Cwf22	1	70.7831	S	_VRPS(ph)S(ph)PGPAGR_	1.51444	0.993049	1.11841	1.20863	22.5175
gi|472587725	RHTO_02949	38	cell cycle control protein, Cwf22	1	70.7831	S	_VRPS(ph)S(ph)PGPAGR_	0.295613	0.158826	0.290495	0.248311	31.2265
gi|472581978	RHTO_04221	402	cell division control protein	0.892949	10.1204	S	_SSTQPELESQS(ph)RPASR_	#DIV/0!	1.68802	2.48657	2.0873	27.0523
gi|472581978	RHTO_04221	669	cell division control protein	0.999999	62.7763	S	_QSTGPHLASPAPAGQFAARPAS(ph)PAQGQR_	1.23341	1.30388	#DIV/0!	1.26865	3.92792
gi|472581978	RHTO_04221	649	cell division control protein	0.906974	9.89091	S	_QS(ph)TGPHLASPAPAGQFAARPAS(ph)PAQGQR_	0.297965	0.610501	#DIV/0!	0.454233	48.6526
gi|472582753	RHTO_03343	893	cell division control protein 24	0.969556	15.0313	S	_SASS(ph)PNIYQTQDGR_	#DIV/0!	2.42101	2.96727	2.69414	14.3371
gi|472584334	RHTO_01143	39	cell division control protein 7	0.853408	6.83203	S	_KQIQPSS(ph)ANS(ph)DDDDGM(ox)HDEVVLAPLPSR_	0.39733	0.444879	#DIV/0!	0.421105	7.98437
gi|472584334	RHTO_01143	36	cell division control protein 7	0.908508	9.26759	S	_KQIQPS(ph)S(ph)ANSDDDDGM(ox)HDEVVLAPLPSR_	0.306119	0.477395	#DIV/0!	0.391757	30.9147
gi|472581599	RHTO_04519	275	cell division control protein Cdc12	0.999914	43.3977	T	_IYTPPVDT(ph)DDEQAVEHAR_	2.27733	1.66121	2.31546	2.08467	17.6152
gi|472580833	RHTO_05858	418	cell division control protein Cdc2	1	76.4849	S	_GSAGSLQAS(ph)PIGR_	1.31572	0.340298	0.607386	0.754468	66.8114
gi|472583691	RHTO_01781	111	cell division control protein Cdc54	0.999146	30.2071	S	_GGRDDS(ph)PLFFPGS(ph)DFGS(ph)PTPR_	#DIV/0!	0.793777	0.813802	0.803789	1.76166
gi|472583691	RHTO_01781	20	cell division control protein Cdc54	0.999957	43.622	S	_STS(ph)PLAFPSSER_	3.30349	0.534074	2.16053	1.99936	69.6084
gi|472583691	RHTO_01781	104	cell division control protein Cdc54	1	80.0733	S	_GGRDDS(ph)PLFFPGSDFGS(ph)PTPR_	3.04118	1.5184	1.38614	1.9819	46.4069
gi|472583691	RHTO_01781	115	cell division control protein Cdc54	0.972369	15.465	S	_GGRDDS(ph)PLFFPGSDFGS(ph)PTPR_	1.65546	0.491352	0.66212	0.936312	67.1389
gi|472584527	RHTO_00867	501	cell division cycle 14	0.860771	7.82105	S	_ARS(ph)KTPS(ph)ASHGAPVTPR_	1.38669	0.344281	1.47896	1.06998	58.8949
gi|472584527	RHTO_00867	497	cell division cycle 14	0.961383	13.3051	S	_ARS(ph)KTPS(ph)ASHGAPVTPR_	1.38669	#DIV/0!	0.682128	1.03441	48.1629
gi|472584527	RHTO_00867	657	cell division cycle 14	0.999822	37.498	S	_IARPATRPLS(ph)ALADNR_	0.378831	#DIV/0!	0.265844	0.322338	24.7857
gi|472586575	RHTO_06098	416	cell division cycle 2-like	0.998399	29.1446	S	_KTTLAS(ph)PSAPQAGGGYDFV_	1.44776	0.791139	1.07585	1.10492	29.801
gi|472582911	RHTO_02521	480	cell polarity protein	0.979148	17.517	S	_SSASRS(ph)PTSSSSDAQLGTR_	2.83246	2.26603	#DIV/0!	2.54925	15.7115
gi|472582911	RHTO_02521	893	cell polarity protein	0.997176	25.6706	S	_SAAS(ph)PSLSHQQYER_	2.82773	1.36741	1.39558	1.86357	44.8121
gi|472582911	RHTO_02521	780	cell polarity protein	0.999909	41.2608	S	_AVS(ph)PTPSQAER_	2.02967	1.96464	#DIV/0!	1.99716	2.30269
gi|472582911	RHTO_02521	823	cell polarity protein	1	67.014	S	_RNS(ph)VDTLASEAK_	0.645286	0.481162	0.675539	0.600662	17.4124
gi|472584628	RHTO_00968	25	cell polarity protein, Tea1	0.998408	29.4852	S	_ADATGQS(ph)PPVGPGGFEPPLRDSGLK_	0.581159	0.805672	1.66456	1.01713	56.2187
gi|472585431	RHTO_07856	34	cell wall biogenesis protein phosphatase, Ssd1	0.99995	42.9886	S	_KQAAS(ph)PNSPAR_	5.11169	3.20143	2.85347	3.7222	32.6647
gi|472585431	RHTO_07856	37	cell wall biogenesis protein phosphatase, Ssd1	0.89197	9.16807	S	_KQAASPNS(ph)PAR_	3.52361	1.92578	#DIV/0!	2.72469	41.4665
gi|472585431	RHTO_07856	80	cell wall biogenesis protein phosphatase, Ssd1	1	81.0034	S	_KPQNQQGGGGGAGGS(ph)HGR_	1.86057	1.70454	#DIV/0!	1.78255	6.18956
gi|472585431	RHTO_07856	469	cell wall biogenesis protein phosphatase, Ssd1	0.997077	25.3449	S	_FLEEDPFASGNDS(ph)PSGGR_	1.20097	0.568246	0.47719	0.748802	52.6476
gi|472585431	RHTO_07856	122	cell wall biogenesis protein phosphatase, Ssd1	1	94.8464	S	_RES(ph)QQNDGLANLQNVISDM(ox)PPPSGGSAR_	0.534988	0.568246	2.71658	1.27327	98.1764
gi|472588406	RHTO_00306	512	cell wall integrity signaling protein	0.884193	8.22487	S	_AS(ph)S(ph)SQGHGQIDYARPPS(ph)AAEQR_	#DIV/0!	0.561419	0.920641	0.74103	34.2777
gi|472588406	RHTO_00306	526	cell wall integrity signaling protein	0.999985	48.7772	S	_AS(ph)S(ph)SQGHGQIDYARPPS(ph)AAEQR_	#DIV/0!	0.561419	0.758208	0.659813	21.0893
gi|472588406	RHTO_00306	259	cell wall integrity signaling protein	0.999852	38.3163	S	_EYS(ph)NEGAQQQTPAQFEDSGIRPVHGDDFAR_	1.74456	1.33385	1.57684	1.55175	13.3077
gi|472588406	RHTO_00306	513	cell wall integrity signaling protein	0.878052	7.7411	S	_AS(ph)SS(ph)QGHGQIDYARPPSAAEQR_	1.19382	0.642674	0.810701	0.882397	32.0128
gi|472588406	RHTO_00306	511	cell wall integrity signaling protein	0.955881	12.2674	S	_AS(ph)SS(ph)QGHGQIDYARPPSAAEQR_	1.08783	0.887942	0.713827	0.896533	20.8749
gi|472587362	RHTO_05041	638	cellular morphogenesis-related protein	0.991433	20.8398	S	_VQTPGGASTAPS(ph)GSPTHSTVNR_	#DIV/0!	5.53986	4.71743	5.12864	11.3392
gi|472587362	RHTO_05041	417	cellular morphogenesis-related protein	0.847366	7.43315	S	_LSS(ph)PSAS(ph)PSASR_	5.11876	#DIV/0!	3.25468	4.18672	31.4829
gi|472587937	RHTO_03162	417	centromere microtubule binding protein cbf5	0.999967	44.8228	S	_AVEDVAAS(ph)PSKK_	0.992359	0.469947	0.622161	0.694822	38.6687
gi|472587749	RHTO_02973	281	centromere protein C	1	74.6123	S	_ATLGADRFS(ph)GS(ph)PK_	2.89553	1.38914	0.804635	1.69643	63.5915
gi|472587749	RHTO_02973	283	centromere protein C	1	80.3445	S	_ATLGADRFS(ph)GS(ph)PK_	1.77696	0.649351	1.14129	1.1892	47.5385
gi|472584827	RHTO_00681	1186	centromere/kinetochore protein ZW10	0.939343	11.8994	S	_SLPGRPSS(ph)AQR_	#DIV/0!	1.07544	1.11817	1.09681	2.75451
gi|472584339	RHTO_01148	469	chitin synthase	1	68.0237	S	_ADAAEAAES(ph)DVEEDQRPEAQDGESSLVDIK_	3.96432	1.94212	1.84342	2.58329	46.3373
gi|472584151	RHTO_01404	85	chitin synthase activator	0.944305	12.293	T	_SQT(ph)M(ox)DDSFYGGPGEPSAVTR_	#DIV/0!	1.14084	1.13309	1.13696	0.481564
gi|472584151	RHTO_01404	204	chitin synthase activator	0.970248	16.5215	S	_GAGSRGS(ph)SDLAPGGSASAGR_	#DIV/0!	1.92608	2.23659	2.08133	10.5492
gi|472588556	RHTO_00456	1896	chitin synthase, glycosyltransferase family 2 protein	0.832361	12.0588	S	_SGDQLVS(ph)LSQSPSRAAS(ph)PAPAPLR_	#DIV/0!	1.32929	1.26706	1.29818	3.38987
gi|472585061	RHTO_07980	1319	chitin synthase, glycosyltransferase family 2 protein	0.955752	13.3022	S	_GDPLM(ox)GSGAGT(ph)PS(ph)PTKDGR_	#DIV/0!	1.76707	0.820681	1.29387	51.7203
gi|472585061	RHTO_07980	1301	chitin synthase, glycosyltransferase family 2 protein	0.962022	14.0399	S	_SLTNS(ph)PQATR_	#DIV/0!	2.6661	0.832016	1.74906	74.1481
gi|472588556	RHTO_00456	1807	chitin synthase, glycosyltransferase family 2 protein	0.989024	19.547	S	_DIS(ph)PYRS(ph)GEFHAR_	#DIV/0!	4.61489	5.00751	4.8112	5.77043
gi|472588556	RHTO_00456	1900	chitin synthase, glycosyltransferase family 2 protein	0.994807	23.3549	S	_SGDQLVSLSQS(ph)PSR_	#DIV/0!	2.25124	2.68492	2.46808	12.4251
gi|472588556	RHTO_00456	1803	chitin synthase, glycosyltransferase family 2 protein	0.999892	39.646	S	_DIS(ph)PYR_	7.56659	4.61489	0.635364	4.27228	81.4153
gi|472588556	RHTO_00456	1906	chitin synthase, glycosyltransferase family 2 protein	1	118.866	S	_AAS(ph)PAPAPLR_	2.13356	1.86064	2.11051	2.0349	7.43801
gi|472585061	RHTO_07980	513	chitin synthase, glycosyltransferase family 2 protein	0.999757	36.1508	S	_ALPLS(ph)PSEKPR_	1.17637	0.697739	0.979816	0.95131	25.2901
gi|472588556	RHTO_00456	844	chitin synthase, glycosyltransferase family 2 protein	0.972215	15.4468	S	_TTS(ph)TAALPLVDR_	0.889759	1.49979	1.44657	1.27871	26.4242
gi|472582770	RHTO_03360	44	choline-phosphate cytidylyltransferase	0.983383	17.7367	S	_EASEESNAETGLS(ph)EDDDLDLSDARPAPASAQPITK_	1.62338	1.42074	#DIV/0!	1.52206	9.41409
gi|472580914	RHTO_05784	224	chorismate synthase	0.908563	9.97231	T	_NDSIGGTVT(ph)CVIR_	0.918274	#DIV/0!	1.25932	1.0888	22.1488
gi|472587780	RHTO_03004	66	chromatin assembly factor 1 subunit A	1	69.757	S	_ASGSKAEGEVLTLDDS(ph)S(ph)DAEM(ox)GEVK_	0.986291	#DIV/0!	0.69735	0.84182	24.2702
gi|472587780	RHTO_03004	67	chromatin assembly factor 1 subunit A	1	72.2154	S	_ASGSKAEGEVLTLDDS(ph)S(ph)DAEM(ox)GEVK_	0.986291	#DIV/0!	0.69735	0.84182	24.2702
gi|472587780	RHTO_03004	476	chromatin assembly factor 1 subunit A	0.788616	5.71793	S	_KSAS(ph)PAPVEAGPSSSPAK_	0.340356	0.904323	#DIV/0!	0.622339	64.0783
gi|472585496	RHTO_07921	416	chromatin assembly factor 1 subunit B	0.968434	20.8181	S	_RS(ph)STSGSQPSQSPR_	#DIV/0!	1.70288	0.817461	1.26017	49.6827
gi|472585562	RHTO_07455	388	chromatin modification-related protein YNG2	1	71.2794	S	_KGIDNS(ph)PDPAAR_	#DIV/0!	1.23291	1.72998	1.48145	23.7258
gi|472581396	RHTO_05298	137	chromatin remodeling complex subunit, Chd3	0.995678	24.0397	S	_SSSS(ph)DSDAAVAAVLR_	#DIV/0!	1.04684	1.01525	1.03104	2.16625
gi|472581396	RHTO_05298	1971	chromatin remodeling complex subunit, Chd3	0.999771	36.4024	S	_KAEILVIS(ph)DSEDDS_	3.36939	1.59895	1.14788	2.03874	57.5962
gi|472581396	RHTO_05298	6	chromatin remodeling complex subunit, Chd3	0.999945	43.7258	S	_SVS(ph)PSAPPR_	1.17975	1.32587	0.825151	1.11026	23.1922
gi|472581396	RHTO_05298	684	chromatin remodeling complex subunit, Chd3	1	103.108	S	_ETQPVADVGPDDVES(ph)DDEVVERIEGEK_	0.586854	0.268796	0.390305	0.415318	38.6446
gi|472584647	RHTO_00987	109	chromatin remodelling complex ATPase chain ISW1	0.997648	26.2746	S	_GEAQEALKS(ph)ADSIK_	#DIV/0!	1.24956	1.47228	1.36092	11.5718
gi|472584647	RHTO_00987	1138	chromatin remodelling complex ATPase chain ISW1	0.997673	26.3214	S	_KAPGAATPALGGADDGAS(ph)NAS(ph)ASR_	3.27257	2.41797	1.21809	2.30288	44.8165
gi|472584647	RHTO_00987	1135	chromatin remodelling complex ATPase chain ISW1	0.999935	40.9014	S	_KAPGAATPALGGADDGAS(ph)NAS(ph)ASR_	2.50445	2.96886	2.32639	2.5999	12.7581
gi|472584647	RHTO_00987	1140	chromatin remodelling complex ATPase chain ISW1	0.999997	55.5681	S	_KAPGAATPALGGADDGASNASAS(ph)R_	2.21646	3.11333	2.2579	2.52923	20.0167
gi|472584647	RHTO_00987	1144	chromatin remodelling complex ATPase chain ISW1	0.998122	25.1082	T	_KAPGAATPALGGADDGASNAS(ph)ASRAS(ph)T(ph)PAAGPAPK_	0.835282	1.46385	1.38389	1.22767	27.871
gi|472584647	RHTO_00987	1143	chromatin remodelling complex ATPase chain ISW1	0.998122	25.1082	S	_KAPGAATPALGGADDGASNAS(ph)ASRAS(ph)T(ph)PAAGPAPK_	0.835282	1.31511	0.908513	1.01964	25.352
gi|472584647	RHTO_00987	1124	chromatin remodelling complex ATPase chain ISW1	1	150.051	T	_KAPGAAT(ph)PALGGADDGASNASASR_	0.668673	1.71165	0.841043	1.07379	52.0669
gi|472588354	RHTO_00254	371	chromatin SPT2 family protein	0.999772	36.4149	S	_ERAFDS(ph)DDS(ph)DM(ox)EATGADVLLEER_	#DIV/0!	0.181646	0.719683	0.450665	84.4196
gi|472588354	RHTO_00254	374	chromatin SPT2 family protein	0.999809	37.1979	S	_ERAFDS(ph)DDS(ph)DM(ox)EATGADVLLEER_	#DIV/0!	0.181646	0.719683	0.450665	84.4196
gi|472584142	RHTO_01395	16	chromatin structure-remodeling complex protein RSC7	0.999991	50.5148	S	_APS(ph)DS(ph)EGSVYQPEDS(ph)PPAASSLHVAAR_	1.77648	2.07305	0.844167	1.56457	40.9868
gi|472584142	RHTO_01395	6	chromatin structure-remodeling complex protein RSC7	0.986079	19.5451	S	_APS(ph)DS(ph)EGSVYQPEDS(ph)PPAASSLHVAAR_	0.952653	1.02898	1.05672	1.01278	5.32118
gi|472584142	RHTO_01395	4	chromatin structure-remodeling complex protein RSC7	0.999382	31.9429	S	_APS(ph)DS(ph)EGSVYQPEDS(ph)PPAASSLHVAAR_	0.952653	1.3071	1.05672	1.10549	16.4803
gi|472586336	RHTO_06923	487	Chromo domain containing protein	1	105.462	S	_AAS(ph)PVEAKPQVQVAQPQAAAEDVAAR_	2.00642	0.747272	0.833264	1.19565	58.8349
gi|472586336	RHTO_06923	260	Chromo domain containing protein	0.951233	10.3096	T	_KARPVVASES(ph)S(ph)DS(ph)DDHAAT(ph)VRR_	1.25207	1.74441	#DIV/0!	1.49824	23.2366
gi|472586336	RHTO_06923	251	Chromo domain containing protein	0.999998	56.8027	S	_KARPVVAS(ph)ES(ph)S(ph)DS(ph)DDHAATVR_	1.11883	0.571625	0.640164	0.776873	38.3744
gi|472586336	RHTO_06923	249	Chromo domain containing protein	0.999999	62.4354	S	_KARPVVAS(ph)ES(ph)S(ph)DS(ph)DDHAATVR_	1.06918	0.584146	0.640164	0.764495	34.7083
gi|472586336	RHTO_06923	254	Chromo domain containing protein	0.999833	37.7494	S	_KARPVVAS(ph)ES(ph)S(ph)DS(ph)DDHAATVR_	0.76599	0.584146	0.640164	0.663433	14.0373
gi|472586336	RHTO_06923	252	Chromo domain containing protein	0.999995	53.2136	S	_KARPVVAS(ph)ES(ph)S(ph)DS(ph)DDHAATVR_	0.76599	0.571625	0.640164	0.659259	14.9531
gi|472586795	RHTO_06318	325	Chromo domain-like containing protein	0.995652	23.5985	S	_SSS(ph)PQLVTR_	0.875197	0.823655	0.775976	0.824943	6.01534
gi|472581908	RHTO_04151	65	chromosome segregation protein	1	101.532	S	_AQS(ph)LGGDALEEAR_	0.826515	0.988924	#DIV/0!	0.907719	12.6516
gi|472581908	RHTO_04151	593	chromosome segregation protein	1	115.682	S	_ALS(ph)VPLGDAAIR_	0.595593	0.454339	0.518565	0.522832	13.527
gi|472583074	RHTO_02342	548	chromosome segregation protein, BIR1	0.999081	31.3476	S	_SPLS(ph)PTVSPT(ph)SPSRPIR_	0.756258	0.433595	0.554232	0.581362	28.0434
gi|472588155	RHTO_00055	238	chromosome segregation protein, Pcs1	0.997168	25.4676	S	_TELASLQSTAFSS(ph)PR_	2.06224	1.07823	1.20262	1.44769	37.0129
gi|472585195	RHTO_08114	848	chromosome transmission fidelity factor	1	58.4898	S	_LAPAGEAPDLEEAFVDEDLDEADAEDDAADS(ph)DS(ph)S(ph)AGDVGKDK_	1.26883	1.79073	2.4929	1.85082	33.1876
gi|472585195	RHTO_08114	847	chromosome transmission fidelity factor	1	58.4898	S	_LAPAGEAPDLEEAFVDEDLDEADAEDDAADS(ph)DS(ph)S(ph)AGDVGKDK_	1.26883	1.79073	2.0945	1.71802	24.3078
gi|472585195	RHTO_08114	845	chromosome transmission fidelity factor	1	58.4898	S	_LAPAGEAPDLEEAFVDEDLDEADAEDDAADS(ph)DS(ph)S(ph)AGDVGKDK_	1.26883	1.40528	2.0945	1.58954	27.8448
gi|472588657	RHTO_00557	1186	class V myosin	0.99963	34.3218	S	_RHS(ph)DGVM(ox)DGVSVS(ph)PIPEDGR_	2.92346	1.36067	#DIV/0!	2.14207	51.5884
gi|472588657	RHTO_00557	1176	class V myosin	0.999992	50.8532	S	_RHS(ph)DGVM(ox)DGVSVS(ph)PIPEDGR_	2.92346	1.36067	#DIV/0!	2.14207	51.5884
gi|472580326	RHTO_06630	477	clathrin-coated vesicle protein (partial sequence c terminus)	0.999953	43.2661	S	_EGFGPLAIAT(ph)DDEGS(ph)EKAPSIK_	8.73973	5.24439	#DIV/0!	6.99206	35.3484
gi|472580326	RHTO_06630	472	clathrin-coated vesicle protein (partial sequence c terminus)	0.999999	60.8361	T	_EGFGPLAIAT(ph)DDEGS(ph)EKAPSIK_	1.87804	5.24439	4.41131	3.84458	45.6037
gi|472583284	RHTO_02148	371	cleavage and polyadenylation specificity factor	1	89.4682	T	_EGT(ph)PKPEAPAVDPLK_	2.97681	3.11954	#DIV/0!	3.04818	3.31101
gi|472587140	RHTO_04818	255	clock controlled protein	1	70.4379	S	_IGAPGAS(ph)PGRK_	1.67802	1.06074	1.00908	1.24928	29.793
gi|472585703	RHTO_07596	91	cofilin	1	128.307	S	_SSESASYDDFVGDLPPNS(ph)PR_	1.06675	1.10649	0.844238	1.00582	14.0523
gi|472587509	RHTO_02731	1494	cohesin complex subunit SA-1/2	1	85.9091	S	_GGS(ph)GGERPGFER_	#DIV/0!	2.87266	2.4216	2.64713	12.0487
gi|472587509	RHTO_02731	1509	cohesin complex subunit SA-1/2	1	81.5184	S	_EAS(ph)IVS(ph)DIS(ph)LSDVPR_	2.14551	0.970497	1.08973	1.40191	46.1319
gi|472587509	RHTO_02731	1512	cohesin complex subunit SA-1/2	0.999895	39.7822	S	_EAS(ph)IVS(ph)DIS(ph)LSDVPR_	2.05702	0.613271	2.02807	1.56612	52.6983
gi|472587509	RHTO_02731	1506	cohesin complex subunit SA-1/2	1	77.6756	S	_EAS(ph)IVS(ph)DIS(ph)LSDVPR_	1.45711	0.970497	1.6208	1.34947	25.0654
gi|472587509	RHTO_02731	53	cohesin complex subunit SA-1/2	0.954538	13.2217	S	_SAANGLS(ph)DDDEDELDEDEDDEEEEDDAEFKVPTSIK_	0.964506	#DIV/0!	0.781433	0.87297	14.8289
gi|472581610	RHTO_04530	318	cohesin complex subunit SCC1	0.976641	17.3971	S	_EKTPTAPS(ph)IAGEDSLQLT(ph)PR_	6.00601	2.52615	#DIV/0!	4.26608	57.6791
gi|472581610	RHTO_04530	461	cohesin complex subunit SCC1	1	80.7379	S	_AM(ox)SVVS(ph)NLS(ph)HLR_	3.30011	3.44792	1.85615	2.86806	30.6636
gi|472581610	RHTO_04530	464	cohesin complex subunit SCC1	1	120.802	S	_AM(ox)SVVS(ph)NLS(ph)HLR_	3.30011	3.44792	1.85615	2.86806	30.6636
gi|472581610	RHTO_04530	328	cohesin complex subunit SCC1	0.999993	51.7064	T	_EKT(ph)PTAPSIAGEDSLQLT(ph)PR_	3.12246	2.52615	1.49479	2.38113	34.5831
gi|472585777	RHTO_07670	250	cohesin loading factor subunit SCC2	0.934762	12.3964	S	_SFS(ph)AGS(ph)AGGSSAAEPSTPSHPGR_	0.907194	0.934929	1.11491	0.985679	11.4415
gi|472585777	RHTO_07670	247	cohesin loading factor subunit SCC2	0.984999	18.6127	S	_SFS(ph)AGSAGGSSAAEPSTPSHPGR_	0.907194	0.921234	1.96044	1.26296	47.8305
gi|472584189	RHTO_01442	1399	cohesin-associated protein Pds5	1	73.2794	S	_AAS(ph)DEEDGADAKPR_	2.77454	2.29806	1.91461	2.32907	18.4968
gi|472587494	RHTO_02716	280	coiled-coil domain-containing protein mtmr15	0.984717	18.091	S	_KASLGS(ph)LGVGYDSK_	0.975134	#DIV/0!	1.34931	1.16222	22.7652
gi|472587494	RHTO_02716	277	coiled-coil domain-containing protein mtmr15	0.997986	26.9511	S	_KAS(ph)LGSLGVGYDSK_	0.806127	#DIV/0!	1.32681	1.06647	34.523
gi|472580605	RHTO_06437	7	condensin complex subunit 2	0.796818	5.97129	S	_RAPS(ph)PSSR_	#DIV/0!	0.971723	1.39534	1.18353	25.3093
gi|472580605	RHTO_06437	15	condensin complex subunit 2	0.99977	36.5904	S	_RRS(ph)S(ph)LPSQPSTPR_	0.24888	#DIV/0!	1.32624	0.787561	96.7303
gi|472580605	RHTO_06437	14	condensin complex subunit 2	0.999942	42.5486	S	_RRS(ph)S(ph)LPSQPSTPR_	0.24888	#DIV/0!	1.49185	0.870364	100.982
gi|472581377	RHTO_05279	217	condensin complex subunit 3	1	69.088	S	_LQDADEGAGDS(ph)DDDS(ph)DDEDEGKEKK_	1.58602	#DIV/0!	0.745045	1.16553	51.0203
gi|472581377	RHTO_05279	221	condensin complex subunit 3	1	69.088	S	_LQDADEGAGDS(ph)DDDS(ph)DDEDEGKEKK_	1.58602	#DIV/0!	0.745045	1.16553	51.0203
gi|472586661	RHTO_06184	206	conjugated polyketone reductase C1	0.999928	43.3066	S	_VESYGGLS(ph)PLLR_	#DIV/0!	0.932575	0.667824	0.8002	23.395
gi|472583008	RHTO_02618	165	conserved fungal protein	1	102.109	S	_TPAPLQAS(ph)PR_	1.78079	0.619655	0.840901	1.08045	57.0612
gi|472585493	RHTO_07918	674	conserved hypothetical protein	0.797951	5.96559	S	_ASS(ph)PSFSSVGIEGK_	#DIV/0!	3.21295	2.38453	2.79874	20.9303
gi|472581628	RHTO_04548	506	conserved hypothetical protein	0.816003	6.47007	S	_ALS(ph)DVGRPSS(ph)PAM(ox)PVSSASAGRPK_	#DIV/0!	1.20773	0.733245	0.970487	34.5714
gi|472587067	RHTO_04746	1136	conserved hypothetical protein	0.847021	6.66937	S	_AAAFFGGDHSSNRPQS(ph)TS(ph)PAR_	#DIV/0!	1.99275	2.15262	2.07268	5.4542
gi|472586363	RHTO_06950	371	conserved hypothetical protein	0.874614	6.9305	T	_TGGVVIEDYVT(ph)S(ph)SDGDDDRDNAANR_	#DIV/0!	1.43941	1.28545	1.36243	7.9907
gi|472588472	RHTO_00372	698	conserved hypothetical protein	0.850946	7.5656	T	_RT(ph)HWSDDEDDLPGHDESR_	#DIV/0!	1.54828	1.05563	1.30195	26.7561
gi|472581351	RHTO_05253	572	conserved hypothetical protein	0.875453	7.80254	T	_RPSVT(ph)S(ph)PR_	#DIV/0!	0.322072	0.452345	0.387208	23.7902
gi|472586727	RHTO_06250	302	conserved hypothetical protein	0.924588	7.87626	S	_SSPINTLTPPS(ph)PAS(ph)SIR_	#DIV/0!	2.24578	1.39173	1.81875	33.2042
gi|472584964	RHTO_00818	654	conserved hypothetical protein	0.915688	10.3586	S	_S(ph)HSLPNNALER_	#DIV/0!	6.8106	0.900333	3.85547	108.396
gi|472584024	RHTO_01700	671	conserved hypothetical protein	0.95478	13.2722	S	_SSS(ph)LLSPASLAAEK_	#DIV/0!	0.346741	0.561167	0.453954	33.4004
gi|472583552	RHTO_02056	371	conserved hypothetical protein	0.921012	13.6774	S	_KVSGSAPS(ph)AVQPAAVASSSR_	#DIV/0!	1.02539	0.705069	0.865229	26.178
gi|472584416	RHTO_01225	931	conserved hypothetical protein	0.954399	14.1801	T	_LFGSFGT(ph)NSGSEKS(ph)PTAVESVR_	#DIV/0!	1.98918	1.57386	1.78152	16.4845
gi|472584030	RHTO_01706	487	conserved hypothetical protein	0.972771	15.5298	S	_SES(ph)PFQVPGLSSAVDEEKK_	#DIV/0!	1.73373	1.34216	1.53794	18.0037
gi|472585580	RHTO_07473	935	conserved hypothetical protein	0.984153	17.9732	S	_AQTS(ph)PFLASHSSK_	#DIV/0!	1.23643	0.932749	1.08459	19.7987
gi|472587067	RHTO_04746	1134	conserved hypothetical protein	0.990453	18.7465	S	_AAAFFGGDHSSNRPQS(ph)TS(ph)PAR_	#DIV/0!	1.99275	2.01975	2.00625	0.95186
gi|472580466	RHTO_06567	275	conserved hypothetical protein	0.988394	19.3024	S	_EGSRPGS(ph)GPEEAAGLPPDKDEFAVDR_	#DIV/0!	2.22638	1.70294	1.96466	18.8393
gi|472583103	RHTO_02372	492	conserved hypothetical protein	0.993613	21.9216	S	_EAS(ph)PSPLSRPAS(ph)PAR_	#DIV/0!	0.238971	0.543242	0.391107	55.011
gi|472583103	RHTO_02372	50	conserved hypothetical protein	0.996739	24.8517	S	_GLLDDLSS(ph)DEEVQVR_	#DIV/0!	1.2213	1.02827	1.12478	12.1352
gi|472582673	RHTO_03587	380	conserved hypothetical protein	0.998522	27.1824	S	_KPPPPTIS(ph)LPAS(ph)PT(ph)SPTRPTSR_	#DIV/0!	1.95316	1.47438	1.71377	19.7546
gi|472580651	RHTO_05966	797	conserved hypothetical protein	0.99798	28.1022	S	_SAS(ph)PSLSAR_	#DIV/0!	3.39179	2.05816	2.72497	34.6063
gi|472585485	RHTO_07910	226	conserved hypothetical protein	0.998482	28.249	S	_GLALGHSQS(ph)QPGTSR_	#DIV/0!	0.566893	0.550873	0.558883	2.02691
gi|472584416	RHTO_01225	935	conserved hypothetical protein	0.998957	30.5959	S	_LFGSFGTNS(ph)GS(ph)EKSPTAVESVR_	#DIV/0!	1.95069	2.06484	2.00776	4.02018
gi|472582393	RHTO_03883	136	conserved hypothetical protein	0.999068	30.6526	S	_TSS(ph)LTGSLAAK_	#DIV/0!	0.799808	0.593577	0.696693	20.9313
gi|472585489	RHTO_07914	69	conserved hypothetical protein	0.999643	34.4915	S	_GPLVREDSDADEPLPSNDS(ph)DEEEEQRVR_	#DIV/0!	1.02236	0.75466	0.88851	21.3044
gi|472583265	RHTO_02311	683	conserved hypothetical protein	0.99964	36.1878	S	_ASTVEPAS(ph)PPPQNTTTR_	#DIV/0!	0.213042	0.886682	0.549862	86.6281
gi|472584416	RHTO_01225	933	conserved hypothetical protein	0.999697	36.9333	S	_LFGSFGTNS(ph)GS(ph)EKSPTAVESVR_	#DIV/0!	1.68577	2.06484	1.8753	14.2931
gi|472585552	RHTO_07445	1032	conserved hypothetical protein	0.999891	40.403	S	_SGSALS(ph)LHEVDEH_	#DIV/0!	1.28084	0.450938	0.865887	67.7717
gi|472584416	RHTO_01225	947	conserved hypothetical protein	0.999961	43.63	S	_S(ph)RPS(ph)NSTLGGGR_	#DIV/0!	1.22736	1.90629	1.56682	30.6402
gi|472588472	RHTO_00372	87	conserved hypothetical protein	0.999999	58.8251	S	_RSAAPVAAS(ph)PQK_	#DIV/0!	0.382731	0.494413	0.438572	18.0064
gi|472580889	RHTO_05759	84	conserved hypothetical protein	1	73.4977	S	_AAPFPLS(ph)PIS(ph)PR_	#DIV/0!	0.84538	1.14755	0.996466	21.4426
gi|472586388	RHTO_06975	526	conserved hypothetical protein	1	79.1997	S	_AIVLDS(ph)DDEAPPPTAR_	#DIV/0!	1.01909	1.21187	1.11548	12.2207
gi|472581065	RHTO_05567	77	conserved hypothetical protein	0.954156	11.8455	S	_KPS(ph)VDTVT(ph)SRS(ph)S(ph)VS(ph)S(ph)LQAPTCK_	8.3619	2.20468	1.54264	4.03641	93.1666
gi|472581065	RHTO_05567	78	conserved hypothetical protein	0.980711	17.066	S	_KPS(ph)VDTVT(ph)SRS(ph)S(ph)VS(ph)S(ph)LQAPTCK_	8.3619	4.02674	2.18857	4.85907	65.233
gi|472581065	RHTO_05567	80	conserved hypothetical protein	0.981305	17.066	S	_KPS(ph)VDTVT(ph)SRS(ph)S(ph)VS(ph)S(ph)LQAPTCK_	8.3619	4.02674	1.54264	4.64376	74.3202
gi|472581351	RHTO_05253	573	conserved hypothetical protein	0.977418	17.2495	S	_RPSVTS(ph)PR_	5.81598	1.24933	1.50686	2.85739	89.7829
gi|472586824	RHTO_06347	295	conserved hypothetical protein	1	120.92	S	_EVVPS(ph)PPPGAQLVDAR_	5.5273	2.16774	1.75466	3.1499	65.6917
gi|472585984	RHTO_07260	325	conserved hypothetical protein	0.998997	30.014	S	_ISVFTPDDS(ph)PTNTR_	5.36596	3.6414	3.44768	4.15168	25.4367
gi|472584141	RHTO_01394	1285	conserved hypothetical protein	0.999886	42.0211	S	_LEVPTPEGRDS(ph)PEDAPAPTAK_	4.92126	5.50509	5.13901	5.18845	5.68647
gi|472581065	RHTO_05567	81	conserved hypothetical protein	0.981792	17.066	S	_KPS(ph)VDTVT(ph)SRS(ph)S(ph)VS(ph)S(ph)LQAPTCK_	4.55976	2.20468	1.54264	2.76903	57.2675
gi|472583417	RHTO_02202	937	conserved hypothetical protein	1	140.959	S	_FAPS(ph)PPVS(ph)PQR_	4.34065	2.64873	2.82151	3.2703	28.4676
gi|472581065	RHTO_05567	449	conserved hypothetical protein	0.999933	40.8825	S	_RPSLVES(ph)IGS(ph)SAS(ph)LGDLR_	4.34028	2.22212	1.34246	2.63495	58.4813
gi|472581065	RHTO_05567	446	conserved hypothetical protein	0.948511	13.8936	S	_RPSLVES(ph)IGS(ph)SAS(ph)LGDLR_	4.17223	2.0236	1.74143	2.64575	50.2494
gi|472584416	RHTO_01225	950	conserved hypothetical protein	0.979301	15.7308	S	_SRPS(ph)NS(ph)TLGGGR_	4.15196	1.75997	1.70651	2.53948	54.9995
gi|472585896	RHTO_07172	436	conserved hypothetical protein	0.999832	37.739	S	_FVDAPS(ph)APQS(ph)PVRPATAR_	3.94617	#DIV/0!	2.45489	3.20053	32.9475
gi|472584907	RHTO_00761	229	conserved hypothetical protein	0.945884	14.9927	S	_RSS(ph)PVHSPGS(ph)SSPER_	3.94508	1.61603	2.28613	2.61575	45.8378
gi|472587230	RHTO_04909	485	conserved hypothetical protein	0.966268	14.5706	S	_SVAGS(ph)PSPR_	3.79276	1.22366	1.20308	2.07317	71.8345
gi|472584416	RHTO_01225	952	conserved hypothetical protein	0.784657	6.22482	S	_SRPSNS(ph)TLGGGR_	3.76861	1.4794	2.81587	2.68796	42.7816
gi|472587296	RHTO_04975	174	conserved hypothetical protein	0.999997	52.8213	S	_T(ph)ASLDIRDS(ph)PPLPAGDEPASK_	3.71761	1.52221	1.45671	2.23218	57.6496
gi|472581065	RHTO_05567	69	conserved hypothetical protein	0.999904	40.2426	S	_KPS(ph)VDTVTSR_	3.68324	5.64621	2.56226	3.9639	39.3807
gi|472582263	RHTO_04003	997	conserved hypothetical protein	0.947458	12.7177	S	_TS(ph)PTM(ox)GAGGLDTFR_	3.4943	5.05076	2.81738	3.78748	30.2362
gi|472585247	RHTO_08166	11	conserved hypothetical protein	0.999994	52.2293	S	_APS(ph)PAPTPR_	3.48566	1.39449	1.42666	2.10227	56.9937
gi|472584430	RHTO_01239	989	conserved hypothetical protein	0.999997	56.2838	S	_GLS(ph)DSSIR_	3.19254	1.69302	1.59266	2.15941	41.4987
gi|472584568	RHTO_00908	14	conserved hypothetical protein	0.999311	34.3097	S	_APAASASTSAKAS(ph)PAPAAAPK_	3.09052	1.57228	#DIV/0!	2.3314	46.0479
gi|472587296	RHTO_04975	166	conserved hypothetical protein	1	64.4202	T	_ART(ph)AS(ph)LDIRDS(ph)PPLPAGDEPASK_	3.01869	0.444583	0.721189	1.39482	101.31
gi|472585673	RHTO_07566	685	conserved hypothetical protein	0.970921	15.2297	S	_KAAAAAAAAEGEGTRS(ph)S(ph)PEDAK_	2.96384	1.80466	2.64992	2.47281	24.2454
gi|472585673	RHTO_07566	686	conserved hypothetical protein	0.998596	28.3918	S	_KAAAAAAAAEGEGTRS(ph)S(ph)PEDAK_	2.96384	0.896941	2.19771	2.0195	51.7411
gi|472581628	RHTO_04548	566	conserved hypothetical protein	1	94.3313	S	_AAS(ph)DIGVTSSGWK_	2.91894	2.01519	1.23133	2.05516	41.0925
gi|472584907	RHTO_00761	110	conserved hypothetical protein	1	89.831	S	_EDGRGS(ph)PIAATPTATK_	2.89009	2.52092	1.93941	2.45014	19.5611
gi|472588222	RHTO_00122	195	conserved hypothetical protein	0.977106	16.3021	S	_NKPKPPPTEGS(ph)PAPAPR_	2.88068	#DIV/0!	2.37017	2.62543	13.7495
gi|472585135	RHTO_08054	95	conserved hypothetical protein	0.91489	8.14317	S	_RS(ph)S(ph)PSPPVGPSRPPGM(ox)VGGK_	2.79994	1.35792	0.915667	1.69118	58.2643
gi|472585135	RHTO_08054	98	conserved hypothetical protein	0.997592	26.7271	S	_RS(ph)SPS(ph)PPVGPSRPPGM(ox)VGGK_	2.79994	1.35792	#DIV/0!	2.07893	49.0475
gi|472580543	RHTO_06478	90	conserved hypothetical protein	0.865662	7.97627	S	_GGTHS(ph)S(ph)DEEEDGAGFASYGDFEAAGK_	2.72442	2.58478	1.8547	2.38797	19.5593
gi|472580543	RHTO_06478	91	conserved hypothetical protein	0.977331	15.7043	S	_GGTHS(ph)S(ph)DEEEDGAGFASYGDFEAAGK_	2.72442	2.58478	1.8547	2.38797	19.5593
gi|472586388	RHTO_06975	32	conserved hypothetical protein	0.999097	31.426	S	_SLS(ph)PDSQKR_	2.68471	1.25734	1.47013	1.80406	42.6842
gi|472584416	RHTO_01225	938	conserved hypothetical protein	0.97552	16.1169	S	_LFGSFGT(ph)NSGSEKS(ph)PTAVESVR_	2.67387	1.98918	1.39144	2.01816	31.7965
gi|472584829	RHTO_00683	45	conserved hypothetical protein	0.999904	43.183	S	_EIDEGEVDQIES(ph)DEEDAAVTSGGAVAGPGPSSLAHSQLAK_	2.62316	1.95091	1.7261	2.10006	22.2258
gi|472583975	RHTO_01651	135	conserved hypothetical protein	0.99687	25.0303	S	_ASVPSS(ph)PVLR_	2.61083	1.7313	1.79061	2.04425	24.0466
gi|472581267	RHTO_05383	750	conserved hypothetical protein	0.999979	46.8686	S	_SGSAGDNS(ph)PGANVNKPGR_	2.58585	0.890076	0.816393	1.43077	69.9625
gi|472580651	RHTO_05966	808	conserved hypothetical protein	1	80.8527	S	_S(ph)RS(ph)PS(ph)PGVGVAGSIEGR_	2.55434	2.11488	1.56446	2.07789	23.8693
gi|472580651	RHTO_05966	806	conserved hypothetical protein	1	81.1178	S	_S(ph)RS(ph)PS(ph)PGVGVAGSIEGR_	2.55434	2.14316	1.56446	2.08732	23.8249
gi|472587182	RHTO_04861	187	conserved hypothetical protein	0.999852	41.2425	T	_QTIETPPT(ph)PPS(ph)TPPSR_	2.47856	0.962371	1.2563	1.56574	51.3538
gi|472587946	RHTO_03171	99	conserved hypothetical protein	1	75.4158	T	_RPVT(ph)PPPK_	2.46142	1.68594	#DIV/0!	2.07368	26.443
gi|472588472	RHTO_00372	701	conserved hypothetical protein	0.987816	19.0889	S	_THWS(ph)DDEDDLPGHDESR_	2.41984	#DIV/0!	1.07831	1.74907	54.2349
gi|472585580	RHTO_07473	1090	conserved hypothetical protein	1	119.544	S	_FDFEQAES(ph)PAR_	2.38931	#DIV/0!	1.63377	2.01154	26.5591
gi|472584907	RHTO_00761	222	conserved hypothetical protein	0.979809	19.8317	S	_RSS(ph)PVHS(ph)PGSSSPER_	2.3876	2.90352	2.3959	2.56234	11.5323
gi|472586727	RHTO_06250	94	conserved hypothetical protein	0.999996	54.202	S	_RRT(ph)QS(ph)PVGLPLYSQEPGEEEM(ox)SLFK_	2.38328	0.811359	1.06165	1.41876	59.532
gi|472586727	RHTO_06250	92	conserved hypothetical protein	0.999997	56.1566	T	_RRT(ph)QS(ph)PVGLPLYSQEPGEEEM(ox)SLFK_	2.38328	0.811359	1.06165	1.41876	59.532
gi|472585580	RHTO_07473	1074	conserved hypothetical protein	1	75.0714	S	_YGAPAS(ph)PDLGSSPR_	2.35905	1.29517	1.69857	1.78426	30.1015
gi|472580651	RHTO_05966	799	conserved hypothetical protein	0.960977	16.6304	S	_SASPS(ph)LSAR_	2.20936	2.25851	1.55092	2.00626	19.6936
gi|472588472	RHTO_00372	526	conserved hypothetical protein	0.98896	19.4923	S	_FGDAGS(ph)PSEGLDYGGGGDDYDRS(ph)PAR_	2.20609	2.38175	1.53551	2.04112	21.8797
gi|472588591	RHTO_00491	102	conserved hypothetical protein	1	77.9414	S	_RADEAGDFVLGDDS(ph)DEEEKDFSSAK_	2.09762	1.32949	1.12989	1.519	33.6368
gi|472588472	RHTO_00372	543	conserved hypothetical protein	0.996161	23.0854	S	_FGDAGSPS(ph)EGLDYGGGGDDYDRS(ph)PAR_	2.07779	1.66962	1.48949	1.74563	17.2675
gi|472583140	RHTO_02410	60	conserved hypothetical protein	1	90.1592	S	_TGEIALPPS(ph)PPLR_	2.04107	1.35261	2.09855	1.83074	22.6722
gi|472585580	RHTO_07473	424	conserved hypothetical protein	0.977255	16.9725	S	_GLPSALTS(ph)PNAR_	2.03699	1.45237	1.70097	1.73011	16.9584
gi|472582862	RHTO_03452	333	conserved hypothetical protein	0.990859	20.3661	S	_TAS(ph)PPHPSAPPPPENR_	2.03442	1.45159	1.45979	1.6486	20.2691
gi|472587946	RHTO_03171	505	conserved hypothetical protein	0.999999	62.5115	S	_AAYAHVDS(ph)DDEDIAEPPKPTSQAK_	1.92474	1.47078	1.045	1.48017	29.7227
gi|472586576	RHTO_06099	875	conserved hypothetical protein	0.994158	21.4079	S	_KAS(ph)LS(ph)SLETSETHESSSR_	1.87126	#DIV/0!	1.00515	1.4382	42.5832
gi|472586388	RHTO_06975	424	conserved hypothetical protein	1	86.9539	S	_ELLAS(ph)DS(ph)ENDDITGVSAK_	1.85791	1.0171	1.11859	1.3312	34.4769
gi|472586388	RHTO_06975	422	conserved hypothetical protein	1	115.328	S	_ELLAS(ph)DS(ph)ENDDITGVSAK_	1.85791	1.0171	1.11859	1.3312	34.4769
gi|472585580	RHTO_07473	1327	conserved hypothetical protein	0.999506	31.6692	S	_RPS(ph)VS(ph)GSLPR_	1.85076	1.35327	1.03662	1.41355	29.0332
gi|472581267	RHTO_05383	325	conserved hypothetical protein	0.986092	18.5082	S	_RSS(ph)PTSLTR_	1.85052	1.37777	1.43629	1.55486	16.5747
gi|472580889	RHTO_05759	87	conserved hypothetical protein	1	73.4977	S	_AAPFPLS(ph)PIS(ph)PR_	1.82645	1.01339	1.23548	1.35844	30.936
gi|472582065	RHTO_04059	475	conserved hypothetical protein	1	86.9205	S	_SAPGTFEVVVHDS(ph)DS(ph)DVDAR_	1.81755	3.31126	2.85258	2.66046	28.7604
gi|472581065	RHTO_05567	35	conserved hypothetical protein	0.960224	14.023	S	_RPS(ph)SENTTPTSSALGDGKR_	1.81202	1.08256	1.28051	1.39169	27.1057
gi|472581628	RHTO_04548	635	conserved hypothetical protein	0.996324	24.3299	S	_QSGGTPAAPAETGS(ph)LKR_	1.78314	1.89007	1.31843	1.66388	18.2652
gi|472586090	RHTO_07366	514	conserved hypothetical protein	0.999631	34.3627	S	_AATFKDS(ph)DDDEERPESVLSQGPR_	1.76885	1.02941	1.09048	1.29624	31.6625
gi|472587022	RHTO_04700	141	conserved hypothetical protein	0.812402	6.36996	S	_SSS(ph)ILLGEDLR_	1.71792	#DIV/0!	0.783024	1.25047	52.8657
gi|472583009	RHTO_02619	273	conserved hypothetical protein	0.810982	6.32507	S	_LVAHSATSANDITDPHSS(ph)PR_	1.67471	0.654622	0.928764	1.08603	48.6094
gi|472584964	RHTO_00818	798	conserved hypothetical protein	0.964173	16.6026	S	_LVTLGSTS(ph)PTK_	1.66273	1.67003	1.39942	1.5774	9.77386
gi|472581628	RHTO_04548	277	conserved hypothetical protein	1	87.6673	S	_AAQVPLPAS(ph)PVPR_	1.65216	1.43928	1.25382	1.44842	13.7614
gi|472586388	RHTO_06975	30	conserved hypothetical protein	0.999991	50.6824	S	_FRS(ph)LS(ph)PDSQK_	1.63669	1.25734	1.47013	1.45472	13.0708
gi|472581065	RHTO_05567	443	conserved hypothetical protein	0.946671	11.2993	S	_RPSLVES(ph)IGS(ph)SAS(ph)LGDLR_	1.6009	1.44338	1.25627	1.43351	12.0353
gi|472586558	RHTO_06081	204	conserved hypothetical protein	0.994193	25.9558	S	_SSTVDIVQGQRAS(ph)S(ph)PPELRPPVR_	1.58103	0.974754	0.83091	1.1289	35.2651
gi|472580474	RHTO_06495	283	conserved hypothetical protein	0.998301	27.6898	S	_KLS(ph)TGGVR_	1.56382	2.50627	1.58798	1.88602	28.4876
gi|472586558	RHTO_06081	203	conserved hypothetical protein	0.994193	25.9558	S	_SSTVDIVQGQRAS(ph)S(ph)PPELRPPVR_	1.54643	#DIV/0!	0.926097	1.23626	35.4813
gi|472587019	RHTO_04697	281	conserved hypothetical protein	0.999082	30.5563	S	_KTDVITIS(ph)DDEDDDAVER_	1.52912	#DIV/0!	1.12197	1.32555	21.7194
gi|472582862	RHTO_03452	136	conserved hypothetical protein	0.993874	26.4021	S	_SPS(ph)LSSLASGR_	1.52506	#DIV/0!	0.963763	1.24441	31.8946
gi|472584416	RHTO_01225	753	conserved hypothetical protein	0.858569	7.90319	S	_APS(ph)SLGQQSM(ox)TNLR_	1.49786	0.626174	0.799744	0.974592	47.3426
gi|472584416	RHTO_01225	754	conserved hypothetical protein	0.994749	22.7745	S	_APSS(ph)LGQQSM(ox)TNLR_	1.49786	0.830841	#DIV/0!	1.16435	40.5078
gi|472580921	RHTO_05791	52	conserved hypothetical protein	0.998492	28.3493	S	_AQS(ph)PSPSQTPHSLK_	1.48192	0.794029	0.733514	1.00315	41.4419
gi|472587922	RHTO_03146	62	conserved hypothetical protein	0.999975	46.0485	S	_LLASEGVAVRS(ph)PR_	1.48032	#DIV/0!	1.69042	1.58537	9.3708
gi|472585544	RHTO_07437	252	conserved hypothetical protein	1	75.509	S	_RPPS(ph)LPR_	1.47063	4.89309	1.63369	2.6658	72.4211
gi|472584416	RHTO_01225	1190	conserved hypothetical protein	0.99473	23.9417	S	_KAS(ph)TTSTSSVATAK_	1.46447	2.78133	1.86919	2.03833	33.0921
gi|472585076	RHTO_07995	1045	conserved hypothetical protein	0.994436	22.5824	S	_NDIHPPS(ph)PTELIHESAAAR_	1.42771	#DIV/0!	1.39047	1.40909	1.86888
gi|472586727	RHTO_06250	212	conserved hypothetical protein	0.999998	56.2999	S	_SAS(ph)EPLGPPR_	1.42529	1.01966	1.25824	1.2344	16.5154
gi|472583166	RHTO_02436	1334	conserved hypothetical protein	1	111.855	S	_KES(ph)PVPVR_	1.40105	0.849041	0.795608	1.01523	33.0165
gi|472584575	RHTO_00915	633	conserved hypothetical protein	0.9998	41.6184	S	_GRS(ph)ES(ph)PAPNLNSTSSGEGSTAAAHALLATAK_	1.38806	2.67073	2.58746	2.21541	32.3966
gi|472584575	RHTO_00915	631	conserved hypothetical protein	0.99992	45.0561	S	_GRS(ph)ES(ph)PAPNLNSTSSGEGSTAAAHALLATAK_	1.38806	1.93547	1.9336	1.75238	18.0047
gi|472585580	RHTO_07473	1331	conserved hypothetical protein	0.898433	9.18738	S	_RPS(ph)VSGS(ph)LPR_	1.38372	#DIV/0!	1.2442	1.31396	7.50828
gi|472582065	RHTO_04059	473	conserved hypothetical protein	1	86.9205	S	_SAPGTFEVVVHDS(ph)DS(ph)DVDAR_	1.36606	2.0414	2.1835	1.86366	23.4348
gi|472581518	RHTO_05199	516	conserved hypothetical protein	1	83.6357	S	_KVEQTPALGAEVS(ph)EDEGAQQQK_	1.33944	1.08931	1.14424	1.191	11.0374
gi|472583417	RHTO_02202	933	conserved hypothetical protein	1	140.959	S	_FAPS(ph)PPVS(ph)PQR_	1.317	1.12246	0.690942	1.04347	30.707
gi|472581351	RHTO_05253	1002	conserved hypothetical protein	0.860891	8.66322	S	_LPSSS(ph)PATAR_	1.31556	#DIV/0!	0.756773	1.03617	38.1333
gi|472581351	RHTO_05253	1072	conserved hypothetical protein	0.999989	49.4173	S	_SAS(ph)PPPAWR_	1.30489	0.963577	1.0126	1.09369	16.8732
gi|472585524	RHTO_07417	284	conserved hypothetical protein	0.994134	22.9877	S	_RGS(ph)TSGGLAGR_	1.28607	1.10964	1.23385	1.20986	7.49095
gi|472583775	RHTO_01865	1178	conserved hypothetical protein	0.999082	30.6042	S	_LVLASAAQAHPPATTS(ph)PR_	1.27802	#DIV/0!	0.994036	1.13603	17.6763
gi|472583166	RHTO_02436	1247	conserved hypothetical protein	1	85.0467	S	_KGYLS(ph)DDDFDDDYINNR_	1.27532	1.12909	0.834585	1.07966	20.792
gi|472580474	RHTO_06495	497	conserved hypothetical protein	0.992479	22.9555	S	_DEGFLSAAS(ph)PTAR_	1.2741	0.863036	1.69831	1.27848	32.6681
gi|472580402	RHTO_06578	600	conserved hypothetical protein	0.879187	8.61968	S	_SAS(ph)LPAHAVPQLPQVR_	1.21364	#DIV/0!	1.06074	1.13719	9.50728
gi|472587020	RHTO_04698	270	conserved hypothetical protein	1	64.9023	S	_KTDVITLS(ph)DDDDDETDLR_	1.19746	1.04201	0.862738	1.03407	16.1984
gi|472584907	RHTO_00761	729	conserved hypothetical protein	0.933121	13.8838	S	_GAYGLPDVPESASES(ph)PTYPVR_	1.185	0.87146	0.724743	0.927068	25.3611
gi|472585673	RHTO_07566	697	conserved hypothetical protein	0.999909	40.4026	S	_SGLPGS(ph)PS(ph)EDDHDDEPQLIR_	1.1733	0.681385	0.728651	0.86111	31.5165
gi|472581267	RHTO_05383	745	conserved hypothetical protein	0.989752	19.8698	S	_SGS(ph)AGDNSPGANVNKPGR_	1.13915	0.9081	0.763534	0.936927	20.2213
gi|472584141	RHTO_01394	504	conserved hypothetical protein	0.829974	8.04817	S	_KSPSVTPSTPSTSSS(ph)PR_	1.13267	0.685824	0.798594	0.872363	26.6377
gi|472587899	RHTO_03123	203	conserved hypothetical protein	0.999767	37.1784	S	_ASTAS(ph)PLTVR_	1.11806	0.95229	0.774174	0.948173	18.1378
gi|472586363	RHTO_06950	218	conserved hypothetical protein	0.8183	6.6306	S	_TDES(ph)PVASPARPAAPATTAAAPAPAR_	1.11764	0.726269	1.00432	0.94941	21.2112
gi|472585489	RHTO_07914	34	conserved hypothetical protein	0.953058	13.9753	S	_SNDLESAPLLSS(ph)PSS(ph)SGGKR_	1.04066	0.702691	1.36232	1.03522	31.8626
gi|472583166	RHTO_02436	442	conserved hypothetical protein	1	105.951	S	_QLS(ph)PPPAPINR_	1.02722	0.745434	0.692281	0.821646	21.9081
gi|472581351	RHTO_05253	603	conserved hypothetical protein	0.996895	25.0655	S	_RPS(ph)ISQGER_	1.02704	1.256	#DIV/0!	1.14152	14.1825
gi|472585552	RHTO_07445	571	conserved hypothetical protein	0.974584	16.9906	S	_TTLAAFADS(ph)LSRSSS(ph)PAVSR_	1.00956	#DIV/0!	0.772141	0.890851	18.845
gi|472583472	RHTO_01974	162	conserved hypothetical protein	0.999833	37.769	S	_RGS(ph)KT(ph)PS(ph)LDPDDRPLTDGPADLM(ox)R_	1.00305	0.914077	0.657678	0.858268	20.8934
gi|472583472	RHTO_01974	158	conserved hypothetical protein	0.999995	53.208	S	_RGS(ph)KT(ph)PS(ph)LDPDDRPLTDGPADLM(ox)R_	1.00305	0.914077	0.657678	0.858268	20.8934
gi|472583472	RHTO_01974	160	conserved hypothetical protein	0.999995	53.208	T	_RGS(ph)KT(ph)PS(ph)LDPDDRPLTDGPADLM(ox)R_	1.00305	0.914077	0.657678	0.858268	20.8934
gi|472587922	RHTO_03146	220	conserved hypothetical protein	0.99808	27.1593	S	_SAQLDFS(ph)PTK_	0.961076	1.91121	2.56115	1.81114	44.4313
gi|472580921	RHTO_05791	340	conserved hypothetical protein	0.889015	9.06966	S	_TGS(ph)NLGTPGAAGLAGTKR_	0.949668	1.08866	0.896539	0.978289	10.1409
gi|472580651	RHTO_05966	586	conserved hypothetical protein	0.999938	42.0574	T	_QNVLNEGYVESPLT(ph)PK_	0.92885	0.671366	0.887075	0.829097	16.6671
gi|472581350	RHTO_05252	122	conserved hypothetical protein	0.999615	34.4853	S	_SS(ph)VPSGLGR_	0.926956	0.556235	0.527955	0.670382	33.2122
gi|472583775	RHTO_01865	949	conserved hypothetical protein	0.932049	13.6127	S	_ASKVPSGSGS(ph)PR_	0.924984	0.409283	1.31399	0.882753	51.4108
gi|472585673	RHTO_07566	699	conserved hypothetical protein	1	64.8064	S	_SGLPGS(ph)PS(ph)EDDHDDEPQLIR_	0.912825	0.668762	1.19589	0.925824	28.4938
gi|472582065	RHTO_04059	791	conserved hypothetical protein	1	190.55	S	_EHLAIALPDS(ph)PVVGR_	0.890789	2.49563	2.98775	2.12472	51.6105
gi|472585406	RHTO_07830	596	conserved hypothetical protein	0.999986	51.3289	S	_STS(ph)LSATSYR_	0.884877	0.942152	1.04787	0.958299	8.62837
gi|472585621	RHTO_07514	178	conserved hypothetical protein	0.996425	24.4609	S	_RAPS(ph)ITDDLSTLQYPR_	0.865426	0.563761	0.471431	0.63354	32.5248
gi|472585076	RHTO_07995	29	conserved hypothetical protein	0.95239	13.0112	S	_TSPDS(ph)PPTLVR_	0.860141	0.633392	#DIV/0!	0.746767	21.4706
gi|472584568	RHTO_00908	510	conserved hypothetical protein	0.921669	15.3703	S	_RRDADDAYDESAAGS(ph)EAGDSVAGSR_	0.860067	#DIV/0!	1.07775	0.968908	15.8864
gi|472584964	RHTO_00818	656	conserved hypothetical protein	0.999746	35.9466	S	_SHS(ph)LPNNALER_	0.848969	1.44712	0.951022	1.08237	29.5624
gi|472585896	RHTO_07172	432	conserved hypothetical protein	0.999999	59.5396	S	_FVDAPS(ph)APQS(ph)PVRPATAR_	0.776036	#DIV/0!	0.720305	0.748171	5.26718
gi|472581628	RHTO_04548	499	conserved hypothetical protein	0.999878	38.2103	S	_ALS(ph)DVGRPS(ph)SPAM(ox)PVSSASAGRPK_	0.758725	1.20773	0.733245	0.8999	29.658
gi|472585489	RHTO_07914	66	conserved hypothetical protein	0.838308	7.14716	S	_GPLVREDSDADEPLPS(ph)NDSDEEEEQRVR_	0.753069	0.872296	#DIV/0!	0.812682	10.3738
gi|472582889	RHTO_02499	285	conserved hypothetical protein	0.993299	21.7144	S	_SSS(ph)GQLVGAR_	0.72015	0.320503	0.646663	0.562439	37.821
gi|472581065	RHTO_05567	75	conserved hypothetical protein	0.803323	6.11151	S	_KPS(ph)VDTVTS(ph)R_	0.690512	#DIV/0!	1.54264	1.11658	53.9636
gi|472584907	RHTO_00761	667	conserved hypothetical protein	0.989917	21.7244	S	_RGSSSISPTSYS(ph)PPNASYATAAAAAR_	0.685025	0.685119	0.625508	0.665218	5.16964
gi|472585552	RHTO_07445	334	conserved hypothetical protein	0.999858	42.9931	S	_FKDKYLAM(ox)ES(ph)DDETSASAVSR_	0.612295	0.204989	0.0808604	0.299382	92.8605
gi|472587946	RHTO_03171	170	conserved hypothetical protein	1	63.6276	S	_ARS(ph)VS(ph)VDPVTDR_	0.605914	0.463177	0.996314	0.688468	40.0874
gi|472585524	RHTO_07417	3190	conserved hypothetical protein	0.993818	22.078	S	_SDS(ph)SPYM(ox)SLGSTR_	0.57554	0.374237	#DIV/0!	0.474889	29.9738
gi|472585552	RHTO_07445	567	conserved hypothetical protein	0.967962	14.8019	S	_TTLAAFADSLS(ph)R_	0.557787	1.51796	0.981932	1.01923	47.2094
gi|472587946	RHTO_03171	177	conserved hypothetical protein	0.999738	35.8126	T	_ARS(ph)VSVDPVT(ph)DR_	0.543744	#DIV/0!	0.996314	0.770029	41.5588
gi|472587296	RHTO_04975	168	conserved hypothetical protein	0.999997	55.6495	S	_ART(ph)AS(ph)LDIRDS(ph)PPLPAGDEPASK_	0.534017	0.444583	0.721189	0.566596	24.9122
gi|472587946	RHTO_03171	489	conserved hypothetical protein	0.987784	19.0774	S	_GRPSQGQDVEPEPNSERPAS(ph)R_	0.515145	#DIV/0!	0.558191	0.536668	5.67171
gi|472580474	RHTO_06495	867	conserved hypothetical protein	0.875762	5.96934	S	_KAS(ph)VPT(ph)PTSLNAPTFATLGR_	0.479916	#DIV/0!	0.648424	0.56417	21.1202
gi|472580474	RHTO_06495	870	conserved hypothetical protein	0.934737	11.3742	T	_KAS(ph)VPT(ph)PTSLNAPTFATLGR_	0.479916	#DIV/0!	0.648424	0.56417	21.1202
gi|472583472	RHTO_01974	237	conserved hypothetical protein	1	84.9424	S	_RRS(ph)S(ph)ADDEITEVAGR_	0.473687	0.227149	0.774773	0.49187	55.7596
gi|472583472	RHTO_01974	236	conserved hypothetical protein	1	84.9424	S	_RRS(ph)S(ph)ADDEITEVAGR_	0.473687	#DIV/0!	0.774773	0.62423	34.1061
gi|472585673	RHTO_07566	480	conserved hypothetical protein	1	81.3556	S	_RQS(ph)VADDAEGVLACDVCR_	0.473462	0.65066	#DIV/0!	0.562061	22.2926
gi|472583166	RHTO_02436	648	conserved hypothetical protein	1	66.5047	S	_FGGVNLAHPPS(ph)DDADPSESQLVTAAK_	0.460787	0.727802	0.562968	0.583852	23.0755
gi|472587563	RHTO_02786	882	conserved hypothetical protein	0.99997	45.2876	S	_AAS(ph)GSGYQALLESR_	0.388999	0.389135	0.527704	0.43528	18.3887
gi|472586576	RHTO_06099	1060	conserved hypothetical protein	0.983138	17.9142	S	_TPS(ph)TDDLLSLATAK_	0.388727	0.319438	0.413548	0.373904	13.0447
gi|472586824	RHTO_06347	1128	conserved hypothetical protein	0.999996	54.9358	S	_SAS(ph)VVSLGQR_	0.387192	0.506894	0.505894	0.46666	14.748
gi|472583265	RHTO_02311	634	conserved hypothetical protein	1	77.4439	S	_TVRLPPGAFPGQS(ph)DDEQGGEDEQPTR_	0.374939	0.34632	0.98464	0.568633	63.4076
gi|472582065	RHTO_04059	189	conserved hypothetical protein	0.999972	46.8475	S	_QAS(ph)LSVSSAR_	0.373371	0.960061	1.0552	0.79621	46.3779
gi|472580633	RHTO_05948	469	conserved hypothetical protein	0.939197	12.9586	S	_ITYREDDPPELPYQS(ph)DDS(ph)ADGDFGTK_	0.336417	0.645369	0.511169	0.497652	31.13
gi|472580633	RHTO_05948	472	conserved hypothetical protein	0.997991	28.3032	S	_ITYREDDPPELPYQS(ph)DDS(ph)ADGDFGTK_	0.336417	0.473283	0.511169	0.44029	20.8792
gi|472585763	RHTO_07656	80	conserved hypothetical protein	1	69.4247	S	_RAS(ph)NAGAYK_	0.244164	0.506842	0.925069	0.558692	61.4651
gi|472585076	RHTO_07995	913	conserved hypothetical protein	0.999998	60.6183	S	_GGS(ph)ALGHYDDTTPR_	0.191015	1.32635	#DIV/0!	0.758681	105.815
gi|472584907	RHTO_00761	953	conserved hypothetical protein	0.997932	28.0373	S	_SPS(ph)SSSLSYAR_	0.0906372	0.155526	0.0525155	0.0995595	52.312
gi|472588139	RHTO_00039	427	conserved hypothetical protein	0.999982	47.4049	S	_VAFDLPPPS(ph)PSEDAPK_	#DIV/0!	0.45333	0.574548	0.513939	16.6779
gi|472588139	RHTO_00039	405	conserved hypothetical protein	0.981195	18.2735	S	_SSLS(ph)RPSS(ph)PSR_	3.05064	#DIV/0!	0.361494	1.70607	111.456
gi|472585276	RHTO_07700	145	conserved hypothetical protein	0.999999	62.0169	S	_HGQANDFVDADDDS(ph)DADQSTNAGGRPQLNKR_	2.56509	1.91058	1.7542	2.07663	20.7157
gi|472588139	RHTO_00039	401	conserved hypothetical protein	0.967408	18.4488	S	_SSLS(ph)RPS(ph)SPSR_	0.335278	0.267237	0.361494	0.321336	15.1401
gi|472580435	RHTO_06536	663	COPI vesicle coat beta' subunit	0.990263	20.0773	S	_SS(ph)PHLGSQTK_	3.52423	1.96313	1.51341	2.33359	45.2246
gi|472586467	RHTO_07054	1232	COPII vesicle coat protein Sec16	0.933569	11.4929	S	_KM(ox)S(ph)TDSYGYDQQR_	2.61028	2.93953	#DIV/0!	2.77491	8.38998
gi|472586467	RHTO_07054	681	COPII vesicle coat protein Sec16	0.999973	45.7533	S	_SEASFNLAS(ph)PPTR_	1.85611	1.2303	1.32231	1.46958	22.9929
gi|472586467	RHTO_07054	670	COPII vesicle coat protein Sec16	0.999999	61.0034	S	_RGPESVAS(ph)PR_	1.78132	1.31603	1.22761	1.44166	20.6336
gi|472586467	RHTO_07054	1274	COPII vesicle coat protein Sec16	0.999997	55.2803	S	_SAS(ph)PLDGEPADLGLER_	1.70239	1.39229	0.899928	1.33154	30.3909
gi|472586467	RHTO_07054	535	COPII vesicle coat protein Sec16	1	75.2449	S	_RES(ph)PRQEPPQPEEPTHDPYAPR_	1.65777	1.33057	1.14788	1.37874	18.7371
gi|472586467	RHTO_07054	1187	COPII vesicle coat protein Sec16	1	160.48	T	_DLAVT(ph)PPAQQR_	1.43484	1.61394	1.41607	1.48829	7.33916
gi|472586467	RHTO_07054	1200	COPII vesicle coat protein Sec16	1	68.8307	S	_GPTVYAS(ph)PNKR_	1.37374	0.822978	0.873591	1.02344	29.7454
gi|472586467	RHTO_07054	1222	COPII vesicle coat protein Sec16	0.999831	37.7265	S	_ANS(ph)YDAPPSR_	0.390778	0.688184	0.44835	0.509104	30.9832
gi|472586467	RHTO_07054	2205	COPII vesicle coat protein Sec16	1	105.002	T	_AAT(ph)NPPPLAR_	0.252258	0.363994	0.248355	0.288202	22.7849
gi|472587615	RHTO_02838	96	copper transporter	0.990219	20.0536	S	_ALS(ph)VLGKTS(ph)AADAAGGEER_	#DIV/0!	0.421834	1.1013	0.761566	63.0875
gi|472587615	RHTO_02838	90	copper transporter	1	101.896	S	_ALS(ph)VLGK_	2.7873	0.489668	1.17059	1.48252	79.6044
gi|472587859	RHTO_03083	221	CorA family metal ion transporter	1	83.4175	S	_KM(ox)SYANQDVDEDAIADDEGPAS(ph)PR_	3.7553	1.93675	0.756659	2.14957	70.275
gi|472587859	RHTO_03083	177	CorA family metal ion transporter	0.959493	12.8817	S	_RFS(ph)TS(ph)DDEPS(ph)ARSPISPR_	3.33934	2.45333	2.60688	2.79985	16.911
gi|472587859	RHTO_03083	123	CorA family metal ion transporter	0.999998	54.5356	S	_NVS(ph)DS(ph)SIDSQGGAYIDHR_	2.66695	0.849762	0.72223	1.41298	76.989
gi|472587859	RHTO_03083	175	CorA family metal ion transporter	0.988292	21.3483	S	_RFS(ph)TSDDEPSAR_	1.26613	0.85492	1.19597	1.10567	19.895
gi|472587859	RHTO_03083	182	CorA family metal ion transporter	0.99442	21.3373	S	_RFST(ph)SDDEPS(ph)ARS(ph)PISPR_	0.72427	0.831808	0.953198	0.836426	13.6932
gi|472587859	RHTO_03083	188	CorA family metal ion transporter	0.999969	46.46	S	_FSTSDDEPSARS(ph)PIS(ph)PR_	0.72427	0.85492	#DIV/0!	0.789595	11.7001
gi|472587859	RHTO_03083	185	CorA family metal ion transporter	0.967647	14.9755	S	_FSTSDDEPSARS(ph)PIS(ph)PR_	0.565579	0.831808	#DIV/0!	0.698694	26.9435
gi|472587859	RHTO_03083	125	CorA family metal ion transporter	0.858842	7.87666	S	_NVS(ph)DS(ph)SIDSQGGAYIDHR_	0.285919	0.912492	0.72223	0.640214	50.1766
gi|472584976	RHTO_00830	1032	coronin 7	1	65.6338	S	_EQQHLDHLFQTAQDEAAS(ph)DEEEVEPVR_	2.42542	1.85684	1.59261	1.95829	21.7318
gi|472588457	RHTO_00357	91	CRAL/TRIO domain-containing protein	0.873843	8.43752	T	_SAT(ph)PTNDEM(ox)EDLHPLSDVEK_	3.07182	2.72725	0.844024	2.21436	54.155
gi|472580950	RHTO_05641	107	crossover junction endonuclease MUS81	0.925264	10.8513	S	_KRPS(ph)AASS(ph)DGEVDPR_	0.974469	0.648719	0.679948	0.767712	23.4119
gi|472580950	RHTO_05641	103	crossover junction endonuclease MUS81	0.98393	17.5264	S	_KRPS(ph)AASS(ph)DGEVDPR_	0.974469	0.648719	0.679948	0.767712	23.4119
gi|472583877	RHTO_01553	21	CsbD-like family protein	0.975952	16.1044	S	_EDAPAPATHAETADTAS(ph)QDAPACSLPSR_	#DIV/0!	8.5237	4.12133	6.32251	49.2358
gi|472587985	RHTO_03210	18	C-type cyclin	0.999993	51.3386	S	_NPDS(ph)PPPLAVTR_	2.41826	1.56389	1.7153	1.89915	24.0051
gi|472580760	RHTO_05935	265	cyclin c	0.840849	7.58199	S	_RQS(ph)QDASNNPSALTTTSSSSSTK_	0.75792	#DIV/0!	0.781067	0.769494	2.127
gi|472588019	RHTO_03244	308	cyclin Pch1	1	90.4533	S	_VEQALANLAKS(ph)PS(ph)PAVDGER_	10.1563	8.29876	4.71743	7.72416	35.7915
gi|472588019	RHTO_03244	310	cyclin Pch1	1	90.4533	S	_VEQALANLAKS(ph)PS(ph)PAVDGER_	10.1563	8.29876	4.71743	7.72416	35.7915
gi|472588255	RHTO_00155	147	cyclophilin, peptidyl-prolyl cis-trans isomerase	0.889422	9.05438	T	_KIEAEGSQT(ph)GRPK_	#DIV/0!	1.18451	0.54484	0.864676	52.3104
gi|472586316	RHTO_06903	17	cytochrome c oxidase assembly protein COX15	0.996659	24.7472	S	_(ac)VS(ph)HAAWRPLAGAAASS(ph)AR_	#DIV/0!	0.899523	2.12143	1.51048	57.2017
gi|472586316	RHTO_06903	3	cytochrome c oxidase assembly protein COX15	0.999997	54.6367	S	_(ac)VS(ph)HAAWRPLAGAAASS(ph)AR_	#DIV/0!	0.899523	2.12143	1.51048	57.2017
gi|472586012	RHTO_07288	16	cytoplasmic dynein heavy chain 1	0.988933	19.8363	S	_RPSS(ph)PAVDGAES(ph)PPTATPGPR_	2.73515	1.48683	0.951746	1.72458	53.0661
gi|472586012	RHTO_07288	7	cytoplasmic dynein heavy chain 1	0.878632	7.87133	S	_RPS(ph)SPAVDGAESPPTAT(ph)PGPR_	1.87438	1.02095	1.0868	1.32738	35.7743
gi|472586012	RHTO_07288	8	cytoplasmic dynein heavy chain 1	0.95408	13.1764	S	_RPSS(ph)PAVDGAESPPTATPGPR_	1.75744	0.834168	0.918442	1.17002	43.6289
gi|472583306	RHTO_02236	544	cytoskeleton assembly control protein Sla1	0.978267	16.5334	S	_DEVDS(ph)DSGAAPPPLASRPPK_	5.18968	5.48787	0.946342	3.87463	65.5637
gi|472583306	RHTO_02236	546	cytoskeleton assembly control protein Sla1	0.931414	12.1394	S	_AS(ph)PIPVPNTRDEVDSDS(ph)GAAPPPLASRPPK_	3.66811	4.96524	2.8307	3.82135	28.1443
gi|472583306	RHTO_02236	531	cytoskeleton assembly control protein Sla1	0.99994	42.5066	S	_AS(ph)PIPVPNTRDEVDS(ph)DSGAAPPPLASRPPK_	3.05642	5.35074	3.28267	3.89661	32.4483
gi|472583306	RHTO_02236	839	cytoskeleton assembly control protein Sla1	0.876895	12.7816	S	_TTS(ph)PATTPSASTQRPTSPVESR_	2.43404	2.4392	1.93323	2.26882	12.8104
gi|472583306	RHTO_02236	816	cytoskeleton assembly control protein Sla1	0.920484	7.58102	S	_RNT(ph)AAS(ph)NT(ph)SVNSGALTAAASELEK_	0.45294	0.506663	1.08124	0.680282	51.1965
gi|472583306	RHTO_02236	813	cytoskeleton assembly control protein Sla1	0.976611	12.4437	T	_RNT(ph)AAS(ph)NT(ph)SVNSGALTAAASELEK_	0.19497	0.742501	0.411794	0.449755	61.3073
gi|472582654	RHTO_03568	318	cytoskeleton assembly control protein Sla2	1	66.235	S	_RPPPQKQPS(ph)PPPAPPSAGIDIEDQR_	2.6154	1.83587	1.82568	2.09232	21.6522
gi|472588584	RHTO_00484	441	DASH complex subunit ASK1	0.999634	35.8591	S	_RPEEETPGLDS(ph)PSQR_	#DIV/0!	0.804311	1.458	1.13116	40.8634
gi|472588584	RHTO_00484	277	DASH complex subunit ASK1	0.999765	36.2916	S	_GLAS(ph)PAPSR_	0.531463	0.47081	0.587234	0.529835	10.99
gi|472582205	RHTO_03945	34	DASH complex, subunit Dam1	0.883016	11.7964	S	_RIS(ph)TTSLR_	1.35879	#DIV/0!	0.984349	1.17157	22.5995
gi|472582205	RHTO_03945	42	DASH complex, subunit Dam1	0.998295	28.3125	S	_ALS(ph)LSQSR_	1.28689	0.817929	0.760572	0.955129	30.2302
gi|472583394	RHTO_02194	311	DASH complex, subunit Spc34	0.823333	6.68421	S	_TGVNVALPSS(ph)PAR_	0.868583	0.883314	0.698373	0.816757	12.5849
gi|472583394	RHTO_02194	325	DASH complex, subunit Spc34	1	87.0009	S	_RVS(ph)LVGAGR_	0.712708	#DIV/0!	0.710631	0.711669	0.206322
gi|472588339	RHTO_00239	176	dCMP deaminase	0.991247	18.3345	S	_KRPAQLSNDPPSPT(ph)PS(ph)PFK_	2.8715	1.92708	#DIV/0!	2.39929	27.8335
gi|472588339	RHTO_00239	186	dCMP deaminase	0.999984	47.9122	S	_QIS(ph)PEPS(ph)PELSR_	1.15923	1.60385	1.01491	1.25933	24.3752
gi|472588339	RHTO_00239	172	dCMP deaminase	0.988298	20.4262	S	_KRPAQLSNDPPS(ph)PTPSPFK_	0.96637	0.752389	0.644579	0.787779	20.7912
gi|472588339	RHTO_00239	182	dCMP deaminase	1	103.191	S	_QIS(ph)PEPS(ph)PELSR_	0.733245	0.433651	0.458863	0.54192	30.6635
gi|472581542	RHTO_05223	414	DDHD domain containing protein	0.999997	54.9651	S	_SDS(ph)PGPGLFASLR_	#DIV/0!	0.556421	0.307144	0.431783	40.8227
gi|472583968	RHTO_01644	649	DDT domain-containing protein	0.921937	13.5044	S	_QDQPDQRDDVDQLGT(ph)PPPAADS(ph)PSTK_	#DIV/0!	1.88147	1.6822	1.78183	7.90782
gi|472583968	RHTO_01644	485	DDT domain-containing protein	1	70.0732	T	_GGAAAAAAAAAAAGEEPGT(ph)PAAEGDDQLADGAGAAAGAER_	#DIV/0!	1.41645	1.50718	1.46182	4.38882
gi|472583968	RHTO_01644	805	DDT domain-containing protein	1	76.7574	S	_AASVKPSAGADEDEEEDQLAS(ph)DDDDER_	#DIV/0!	2.44105	1.2733	1.85718	44.4612
gi|472583968	RHTO_01644	820	DDT domain-containing protein	0.999821	37.5362	S	_SVAPSEAGS(ph)ISYLSR_	8.91981	3.30447	1.28521	4.50317	87.8478
gi|472583968	RHTO_01644	642	DDT domain-containing protein	1	78.2837	T	_QDQPDQRDDVDQLGT(ph)PPPAADSPSTK_	1.36672	1.12305	0.9993	1.16302	16.0737
gi|472585189	RHTO_08108	241	dedicator of cytokinesis 3/4/5	0.989941	19.9854	S	_LGLAS(ph)PGTDERS(ph)SPPLPSLK_	2.00574	1.08563	1.2697	1.45369	33.4916
gi|472580437	RHTO_06538	26	delta-12 fatty acid desaturase	0.973226	14.7283	S	_KEKEHDVLAS(ph)SDS(ph)EDEHNQDPIK_	2.05052	#DIV/0!	1.70657	1.87855	12.9468
gi|472580437	RHTO_06538	29	delta-12 fatty acid desaturase	0.999891	38.6782	S	_KEKEHDVLAS(ph)SDS(ph)EDEHNQDPIK_	2.02045	#DIV/0!	2.68738	2.35391	20.0344
gi|472580437	RHTO_06538	444	delta-12 fatty acid desaturase	0.998215	27.4771	S	_RVAVPAEVPS(ph)DSGVEGL_	1.14107	0.545316	0.633352	0.773246	41.5873
gi|472580437	RHTO_06538	446	delta-12 fatty acid desaturase	0.99666	24.748	S	_RVAVPAEVPSDS(ph)GVEGL_	0.936242	1.16513	0.754091	0.951822	21.6389
gi|472585735	RHTO_07628	26	delta24(24(1))-sterol reductase	0.999998	56.9292	S	_TKAAATTSAESAPAS(ph)PAK_	0.550691	#DIV/0!	0.121227	0.335959	90.3911
gi|472585401	RHTO_07825	22	dicarboxylic amino acid permease	0.999998	56.0906	S	_DFPATANVLS(ph)R_	22.6788	#DIV/0!	2.99052	12.8347	108.47
gi|472586995	RHTO_04673	729	differentiation regulator, Nrd1	0.964743	14.42	S	_SPFPDVM(ox)SSFPTS(ph)PLQTDQLR_	#DIV/0!	0.444129	0.42633	0.435229	2.89167
gi|472584616	RHTO_00956	101	digestive organ expansion factor	0.999999	64.6509	S	_VGAEDAAFS(ph)DADS(ph)DDEAAPSPSSSVAK_	1.68028	0.527704	1.22972	1.1459	50.6885
gi|472584616	RHTO_00956	97	digestive organ expansion factor	1	93.5605	S	_VGAEDAAFS(ph)DADS(ph)DDEAAPSPSSSVAK_	1.68028	0.527704	1.22972	1.1459	50.6885
gi|472585833	RHTO_07109	399	DIL and Ankyrin domain containing protein	0.816697	6.48963	S	_RIENEADS(ph)DSEEGAGSPFDWQR_	#DIV/0!	0.885583	0.742776	0.81418	12.4026
gi|472587080	RHTO_04758	291	diphthamide synthesis protein	0.900484	9.56583	S	_LAIEAAPS(ph)SDDEAKAAQAEQPK_	0.506868	0.228483	0.163575	0.299642	60.864
gi|472584265	RHTO_01518	198	D-isomer specific 2-hydroxyacid dehydrogenase	0.999987	48.9354	T	_GGT(ph)PTPESGYIIK_	3.32889	2.71717	1.91556	2.65388	26.7077
gi|472586049	RHTO_07325	375	DNA damage-inducible v-SNARE binding protein Ddi1	0.99966	34.6711	T	_T(ph)LGQSPNAS(ph)PDPKR_	#DIV/0!	0.614062	0.60183	0.607946	1.42277
gi|472586049	RHTO_07325	379	DNA damage-inducible v-SNARE binding protein Ddi1	0.995536	23.4837	S	_TLGQS(ph)PNAS(ph)PDPKR_	1.16824	0.567312	0.612895	0.782815	42.7385
gi|472586049	RHTO_07325	383	DNA damage-inducible v-SNARE binding protein Ddi1	1	70.3369	S	_TLGQS(ph)PNAS(ph)PDPKR_	1.16824	0.590214	0.607312	0.788588	41.7071
gi|472588202	RHTO_00102	390	DNA double-strand break repair and VJ recombination XRCC4, N-terminal	0.999975	47.5656	S	_SIADAS(ph)PPPTAETDPEAAEKER_	2.57852	1.30185	1.37535	1.7519	40.9161
gi|472587034	RHTO_04712	12	DNA excision repair protein ERCC-3	0.901033	9.60162	S	_RAQDAGYS(ph)DSDSTASGPAPK_	2.0803	1.31132	1.40673	1.59945	26.206
gi|472581182	RHTO_05499	127	DNA ligase	0.999998	57.9308	S	_DKDAAS(ph)PVASSSSAAK_	3.09425	3.90961	1.04443	2.68276	55.0271
gi|472581182	RHTO_05499	118	DNA ligase	0.994358	22.4633	S	_GVS(ph)PSKDKDAAS(ph)PVASSSSAAK_	2.17538	1.03189	1.28523	1.4975	40.1051
gi|472581182	RHTO_05499	49	DNA ligase	0.999788	36.7442	S	_DRQTAPS(ph)PAVEPK_	1.12743	0.601721	0.434839	0.721331	50.1098
gi|472583012	RHTO_02622	477	DNA methyltransferase 1-associated protein 1	1	78.5463	S	_S(ph)AS(ph)VASSTVSTKR_	1.46852	1.42322	0.904323	1.26535	24.7742
gi|472583012	RHTO_02622	479	DNA methyltransferase 1-associated protein 1	1	74.589	S	_S(ph)AS(ph)VASSTVSTKR_	0.283873	1.55369	0.378444	0.738668	95.7683
gi|472583012	RHTO_02622	482	DNA methyltransferase 1-associated protein 1	0.974567	20.5964	S	_SAS(ph)VAS(ph)STVSTKR_	0.141323	0.178948	0.70932	0.343197	92.5502
gi|472587636	RHTO_02859	35	DNA mismatch repair protein MSH3	0.999857	38.4438	S	_APVPQKQESVLVLDS(ph)S(ph)DEDEEVRDQAGR_	1.05712	0.784498	0.950661	0.930758	14.7615
gi|472587636	RHTO_02859	36	DNA mismatch repair protein MSH3	0.999954	43.3897	S	_APVPQKQESVLVLDS(ph)S(ph)DEDEEVRDQAGR_	1.05712	0.784498	0.950661	0.930758	14.7615
gi|472583167	RHTO_02437	13	DNA mismatch repair protein MSH4	0.99899	30.9451	T	_(ac)M(ox)AS(ph)RSRAGSRPAT(ph)AR_	0.392773	0.612445	0.843739	0.616319	36.5895
gi|472583325	RHTO_02195	69	DNA mismatch repair protein MSH6	0.951108	12.6242	S	_KGEVVTLES(ph)S(ph)DVEAEPNEEEAKVK_	2.9976	2.31225	1.58428	2.29804	30.7551
gi|472583325	RHTO_02195	144	DNA mismatch repair protein MSH6	1	77.9692	S	_GVVVDS(ph)EEEDEEDVKPLKK_	1.99681	1.21474	1.0598	1.42378	35.2765
gi|472583325	RHTO_02195	68	DNA mismatch repair protein MSH6	0.94354	11.9991	S	_KGEVVTLES(ph)S(ph)DVEAEPNEEEAKVK_	0.318309	0.795608	#DIV/0!	0.556959	60.5972
gi|472584195	RHTO_01448	1250	DNA polymerase epsilon subunit 1	1	68.7596	T	_EPT(ph)PPPPAAPKPDITK_	1.9939	1.21457	1.28535	1.49794	28.771
gi|472580787	RHTO_05812	12	DNA polymerase epsilon subunit 3	1	168.69	S	_KPAQS(ph)DPADEDGGLEAFELQK_	0.625195	0.510256	0.487163	0.540872	13.6694
gi|472583116	RHTO_02386	3	DNA polymerase eta subunit	1	111.057	S	_GS(ph)PPIPDR_	4.67574	3.27998	2.70746	3.55439	28.4838
gi|472587693	RHTO_02917	937	DNA polymerase phi subunit	0.999994	51.9355	S	_KAAS(ph)PADGVDASASAESALDALK_	1.75328	1.60095	1.21499	1.52307	18.2174
gi|472585194	RHTO_08113	787	DNA polymerase sigma subunit	0.986416	17.8367	S	_ATS(ph)KTGS(ph)S(ph)VDS(ph)DEVVEALIVPPAKR_	1.57846	0.951203	1.28373	1.27113	24.688
gi|472585194	RHTO_08113	786	DNA polymerase sigma subunit	0.935492	10.9392	S	_ATS(ph)KTGS(ph)S(ph)VDS(ph)DEVVEALIVPPAKR_	1.49071	1.03884	0.959233	1.16293	24.6486
gi|472585194	RHTO_08113	784	DNA polymerase sigma subunit	0.830492	6.29677	T	_ATSKT(ph)GS(ph)SVDS(ph)DEVVEALIVPPAKR_	1.46113	0.814531	#DIV/0!	1.13783	40.1832
gi|472585194	RHTO_08113	790	DNA polymerase sigma subunit	0.999991	48.3591	S	_TGSS(ph)VDS(ph)DEVVEALIVPPAKR_	1.4551	0.951203	0.70205	1.03612	37.0264
gi|472585194	RHTO_08113	354	DNA polymerase sigma subunit	0.999747	35.9747	S	_QRAS(ph)PEEGEEADS(ph)DEDEEGQLSGGAEPHPVDHGVAR_	0.548426	0.533134	0.490581	0.524047	5.71974
gi|472580908	RHTO_05778	19	DNA repair protein rad16	0.854338	6.3432	S	_RSSTHSSAVTIISS(ph)DS(ph)ET(ph)EGAATGAR_	#DIV/0!	1.882	1.90821	1.89511	0.978184
gi|472580908	RHTO_05778	21	DNA repair protein rad16	0.865987	7.02159	S	_RSSTHSSAVTIISS(ph)DS(ph)ET(ph)EGAATGAR_	#DIV/0!	1.882	1.90821	1.89511	0.978184
gi|472582642	RHTO_03556	17	DNA repair protein rad18	0.998699	30.0687	S	_HIRIDT(ph)DS(ph)DGNES(ph)DSASPSKR_	#DIV/0!	0.859919	0.913409	0.886664	4.26575
gi|472582642	RHTO_03556	12	DNA repair protein rad18	0.999997	60.759	S	_HIRIDT(ph)DS(ph)DGNES(ph)DSASPSKR_	#DIV/0!	0.859919	0.913409	0.886664	4.26575
gi|472582642	RHTO_03556	10	DNA repair protein rad18	0.999998	62.585	T	_HIRIDT(ph)DS(ph)DGNES(ph)DSASPSKR_	#DIV/0!	0.859919	0.913409	0.886664	4.26575
gi|472582642	RHTO_03556	37	DNA repair protein rad18	1	83.4044	S	_ARLDHDEEEDQS(ph)ANAS(ph)PLPR_	2.62646	1.78476	1.61684	2.00935	26.9234
gi|472582642	RHTO_03556	41	DNA repair protein rad18	1	83.4044	S	_ARLDHDEEEDQS(ph)ANAS(ph)PLPR_	1.8722	1.2659	1.18655	1.44155	26.0178
gi|472582699	RHTO_03613	46	DNA repair protein rad5	0.999984	48.0057	S	_VDTVHIES(ph)DDDERAPVAGPSR_	3.41425	#DIV/0!	2.35949	2.88687	25.8351
gi|472584655	RHTO_00995	50	DNA repair protein rad5	0.960704	14.0562	S	_QADTLDLTGDS(ph)PPPQQPQRPAVTQSEAAR_	1.86282	1.66085	1.71913	1.7476	5.94821
gi|472582699	RHTO_03613	939	DNA repair protein rad5	0.843606	11.7843	S	_HGYSIQTVASS(ph)PGSSTSK_	1.59444	1.60774	#DIV/0!	1.60109	0.587572
gi|472582699	RHTO_03613	953	DNA repair protein rad5	1	131.853	S	_EVLILDS(ph)DDEDDKPPSPK_	1.56292	1.36795	1.70914	1.54667	11.0672
gi|472582699	RHTO_03613	962	DNA repair protein rad5	1	78.4134	S	_EVLILDS(ph)DDEDDKPPS(ph)PK_	1.19184	#DIV/0!	0.911328	1.05158	18.8621
gi|472584441	RHTO_01250	2277	DNA repair protein rad8	0.967266	14.3392	S	_S(ph)KPSS(ph)PAQPAFK_	#DIV/0!	1.72759	1.14516	1.43638	28.6723
gi|472584441	RHTO_01250	2358	DNA repair protein rad8	0.971631	18.2718	T	_KVEAM(ox)QLDDDS(ph)DDERETT(ph)PSPVK_	1.70314	1.9741	1.3758	1.68435	17.7869
gi|472584441	RHTO_01250	2276	DNA repair protein rad8	0.857397	7.78891	S	_S(ph)KPS(ph)SPAQPAFK_	1.64987	#DIV/0!	1.14516	1.39751	25.5368
gi|472584441	RHTO_01250	2273	DNA repair protein rad8	0.999681	34.2978	S	_S(ph)KPS(ph)SPAQPAFK_	1.27902	1.72759	1.14516	1.38392	22.043
gi|472584441	RHTO_01250	2351	DNA repair protein rad8	0.99987	37.12	S	_KVEAM(ox)QLDDDS(ph)DDERET(ph)TPSPVK_	0.864902	1.9741	1.40863	1.41588	39.1725
gi|472583379	RHTO_02146	896	DNA repair protein REV1	0.990742	17.2842	S	_KEPSTIILDS(ph)DS(ph)DTEEIASR_	2.05432	1.69228	1.34014	1.69558	21.0606
gi|472582302	RHTO_03792	91	DNA replication complex GINS protein SLD5	0.999813	37.2849	S	_GDS(ph)PSLEDILGEGSGR_	#DIV/0!	3.73218	1.69618	2.71418	53.0425
gi|472586948	RHTO_04626	17	DNA replication factor A subunit Ssb3	0.983415	18.4925	S	_LAQSS(ph)PGSTVR_	3.11857	0.865127	0.829738	1.60448	81.7313
gi|472585607	RHTO_07500	976	DNA replication regulator DPB11	0.998709	29.8993	S	_AAS(ph)STPLQR_	#DIV/0!	0.706364	0.96432	0.835342	21.8356
gi|472586770	RHTO_06293	271	DNA topoisomerase I	0.999997	55.8867	S	_EAGS(ph)GDEDVYKWWENQNDGEEK_	1.79301	#DIV/0!	0.933881	1.36345	44.5561
gi|472586770	RHTO_06293	752	DNA topoisomerase I	1	101.052	S	_QAYGDDES(ph)DLDDEWIQEHEK_	1.15624	0.934317	0.784498	0.958353	19.5162
gi|472586770	RHTO_06293	121	DNA topoisomerase I	0.999994	51.8611	S	_KRAAS(ph)ES(ph)DS(ph)EDEKPLAQTAAGK_	0.85778	0.623597	0.357577	0.612985	40.8282
gi|472586770	RHTO_06293	123	DNA topoisomerase I	0.999992	50.7477	S	_KRAAS(ph)ES(ph)DS(ph)EDEKPLAQTAAGK_	0.734376	0.623597	0.357577	0.57185	33.8648
gi|472586770	RHTO_06293	119	DNA topoisomerase I	0.999999	60.3769	S	_RAAS(ph)ES(ph)DS(ph)EDEKPLAQTAAGKK_	0.628694	0.805672	0.406934	0.613767	32.5511
gi|472586770	RHTO_06293	14	DNA topoisomerase I	1	77.2211	S	_VIQADS(ph)DES(ph)DNDQPEFKRPK_	0.195725	#DIV/0!	1.00101	0.598368	95.1626
gi|472586770	RHTO_06293	17	DNA topoisomerase I	1	77.2211	S	_VIQADS(ph)DES(ph)DNDQPEFKRPK_	0.195725	#DIV/0!	1.92322	1.05948	115.295
gi|472580319	RHTO_06677	1457	DNA topoisomerase II	1	97.3999	S	_AKS(ph)VELDDS(ph)DDEPVVTKK_	3.00174	1.78053	2.07301	2.28509	27.9039
gi|472580319	RHTO_06677	1317	DNA topoisomerase II	1	128.45	S	_AAYAS(ph)DDDDDFEVKPK_	1.68169	1.3089	1.08275	1.35778	22.2749
gi|472580319	RHTO_06677	1463	DNA topoisomerase II	1	90.1886	S	_SVELDDS(ph)DDEPVVTKK_	1.25745	0.995917	0.788333	1.0139	23.1853
gi|472580319	RHTO_06677	1346	DNA topoisomerase II	1	88.3289	T	_KAKPAVPLPET(ph)DDDEDVVM(ox)K_	1.22055	1.09581	0.731743	1.01603	24.9974
gi|472580319	RHTO_06677	1418	DNA topoisomerase II	1	95.3575	S	_VAAS(ph)DIEDEDDELDDLYALPAK_	0.93362	0.553863	0.596374	0.694619	29.9544
gi|472583546	RHTO_02050	568	DNA/RNA helicase, DEAD/DEAH box type	0.932361	13.9678	T	_SSRPGSGINTPALSESGAST(ph)PT(ph)GSEVGRDGSTTGGR_	0.502109	0.642508	0.502614	0.549077	14.7364
gi|472583546	RHTO_02050	567	DNA/RNA helicase, DEAD/DEAH box type	0.992545	21.774	S	_SSRPGSGINTPALSESGAS(ph)T(ph)PTGSEVGR_	0.438924	0.612182	0.61954	0.556882	18.356
gi|472583546	RHTO_02050	558	DNA/RNA helicase, DEAD/DEAH box type	0.989392	19.7909	T	_SSRPGSGINT(ph)PALS(ph)ESGASTPTGSEVGR_	0.212197	0.912492	0.353195	0.492628	75.1854
gi|472583546	RHTO_02050	562	DNA/RNA helicase, DEAD/DEAH box type	0.996684	25.0605	S	_SSRPGSGINT(ph)PALS(ph)ESGASTPTGSEVGR_	0.212197	0.3125	#DIV/0!	0.262349	27.0346
gi|472583546	RHTO_02050	570	DNA/RNA helicase, DEAD/DEAH box type	0.922146	11.1236	T	_SSRPGSGINTPALSESGAST(ph)PT(ph)GSEVGRDGSTTGGR_	0.170736	0.574911	0.271231	0.338959	62.0805
gi|472583546	RHTO_02050	564	DNA/RNA helicase, DEAD/DEAH box type	0.925733	11.5789	S	_SSRPGSGINTPALSES(ph)GAST(ph)PTGSEVGR_	0.164856	0.592417	0.502614	0.419962	53.6823
gi|472584231	RHTO_01484	208	DNA/RNA-binding protein Kin17 containing protein	0.991112	22.1941	S	_EALQAGGTGEGDEAAAS(ph)GS(ph)GGEGEAPTHELKR_	2.29037	1.37718	1.62978	1.76578	26.7044
gi|472584231	RHTO_01484	206	DNA/RNA-binding protein Kin17 containing protein	0.994262	24.7904	S	_EALQAGGTGEGDEAAAS(ph)GS(ph)GGEGEAPTHELKR_	1.9273	1.11079	#DIV/0!	1.51905	38.0081
gi|472584031	RHTO_01707	303	DNA-3-methyladenine glycosylase II	0.939575	11.9172	S	_KLAPPS(ph)PTK_	2.59128	1.50857	2.37626	2.1587	26.5532
gi|472584031	RHTO_01707	68	DNA-3-methyladenine glycosylase II	0.989667	19.8164	T	_TPYVPPT(ph)PNTQK_	2.38237	0.830151	0.982125	1.39822	61.1983
gi|472585547	RHTO_07440	708	DNA-binding protein creA	0.815751	6.48733	S	_HAACGYASQPAS(ph)APS(ph)SRPTS(ph)PAAAQQQR_	#DIV/0!	0.676727	1.06787	0.872301	31.7072
gi|472585547	RHTO_07440	661	DNA-binding protein creA	0.996464	28.2064	S	_SQPGS(ph)PVLAAQGSSRPGTASR_	4.99525	1.29054	1.41233	2.56604	82.019
gi|472585547	RHTO_07440	704	DNA-binding protein creA	0.801753	6.41159	S	_HAACGYASQPASAPSS(ph)RPT(ph)SPAAAQQQR_	3.81665	0.488424	0.719269	1.67478	110.97
gi|472585547	RHTO_07440	700	DNA-binding protein creA	0.999167	32.6267	S	_HAACGYASQPAS(ph)APS(ph)SRPT(ph)SPAAAQQQR_	2.05158	0.661113	0.819538	1.17741	64.6491
gi|472585547	RHTO_07440	487	DNA-binding protein creA	0.969435	14.9794	S	_HAYAPYSLPSTADHS(ph)LANS(ph)PASS(ph)PK_	1.7592	1.92519	0.319438	1.33461	66.1671
gi|472585547	RHTO_07440	483	DNA-binding protein creA	0.996814	24.9383	S	_HAYAPYSLPSTADHS(ph)LANS(ph)PASS(ph)PK_	1.7592	1.92519	0.319438	1.33461	66.1671
gi|472585547	RHTO_07440	703	DNA-binding protein creA	0.836302	7.1217	S	_HAACGYASQPAS(ph)APS(ph)SRPTSPAAAQQQR_	1.01371	0.903669	0.902283	0.939886	6.80226
gi|472585547	RHTO_07440	707	DNA-binding protein creA	0.8376	7.60847	T	_HAACGYASQPASAPSSRPT(ph)SPAAAQQQR_	1.01371	0.488424	1.15923	0.887121	39.7764
gi|472585547	RHTO_07440	479	DNA-binding protein creA	0.97404	18.5	S	_HAYAPYSLPSTADHS(ph)LANS(ph)PASS(ph)PK_	0.375122	1.92519	#DIV/0!	1.15015	95.2969
gi|472585095	RHTO_08014	1498	DNA-directed RNA polymerase II subunit RPB1	1	63.6801	T	_TPGGGAT(ph)PYADLSEGK_	3.02746	2.47868	4.19111	3.23242	27.0516
gi|472585095	RHTO_08014	1650	DNA-directed RNA polymerase II subunit RPB1	0.95656	15.1766	S	_FS(ph)PASPAFSPASPR_	2.72807	3.12656	3.77316	3.20926	16.4346
gi|472585095	RHTO_08014	1678	DNA-directed RNA polymerase II subunit RPB1	0.984545	18.5734	S	_FSPTSPAYS(ph)PTSPK_	0.792519	1.24312	0.932488	0.989374	23.3099
gi|472585095	RHTO_08014	1674	DNA-directed RNA polymerase II subunit RPB1	0.999354	33.8982	S	_FSPTS(ph)PAYSPTSPK_	0.655609	0.927386	0.672766	0.75192	20.2414
gi|472583723	RHTO_01813	275	DNA-directed RNA polymerase III subunit RPC3	1	130.109	S	_GKAAPVDS(ph)S(ph)DEDELEDDGFVVK_	1.15652	0.621234	0.982898	0.920218	29.6771
gi|472583723	RHTO_01813	276	DNA-directed RNA polymerase III subunit RPC3	1	130.109	S	_GKAAPVDS(ph)S(ph)DEDELEDDGFVVK_	1.15652	0.621234	0.982898	0.920218	29.6771
gi|472580351	RHTO_06655	389	DNA-directed RNA polymerase III subunit RPC6	1	97.7971	S	_QKAGS(ph)DEEDEDDDAPR_	#DIV/0!	0.823384	0.827541	0.825462	0.356049
gi|472581364	RHTO_05266	285	DnaJ homolog subfamily C member 1	0.92624	11.4371	S	_KPTVS(ph)ADEAGATSGEEATSGGEEGGKK_	2.01515	2.10535	#DIV/0!	2.06025	3.09571
gi|472583626	RHTO_02130	81	dolichyl-phosphate-mannose-protein mannosyltransferase, glycosyltransferase family 39 protein	0.995672	23.6185	S	_KPS(ph)LSDR_	#DIV/0!	1.64558	1.76001	1.70279	4.75185
gi|472583407	RHTO_02306	38	Dol-P-Man: protein α-mannosyltransferase, glycosyltransferase family 39 protein	0.956811	13.4546	S	_AVS(ph)PSHDPR_	2.052	#DIV/0!	1.80271	1.92735	9.1458
gi|472581475	RHTO_05156	587	double-strand break repair protein MRE11	1	106.975	S	_AQDS(ph)DGDEEDEDEEDESSHR_	#DIV/0!	1.03001	1.23387	1.13194	12.7344
gi|472581475	RHTO_05156	678	double-strand break repair protein MRE11	1	88.5476	T	_AKADLFNPDEDEDDDEEEAT(ph)PPPK_	1.10796	#DIV/0!	1.79553	1.45174	33.4896
gi|472587629	RHTO_02852	2	double-strand siRNA ribonuclease	0.972648	15.4981	S	_(ac)M(ox)S(ph)RPLTVAELRDALAALS(ph)LDS(ph)R_	2.70409	#DIV/0!	2.09371	2.3989	17.9916
gi|472587629	RHTO_02852	18	double-strand siRNA ribonuclease	0.999234	29.8184	S	_(ac)M(ox)S(ph)RPLTVAELRDALAALS(ph)LDS(ph)R_	2.70409	#DIV/0!	2.09371	2.3989	17.9916
gi|472587629	RHTO_02852	21	double-strand siRNA ribonuclease	0.999892	38.3303	S	_(ac)M(ox)S(ph)RPLTVAELRDALAALS(ph)LDS(ph)R_	2.70409	#DIV/0!	2.09371	2.3989	17.9916
gi|472586504	RHTO_06027	176	DUF1168 domain protein	0.999546	33.4286	S	_TADERDAS(ph)GGEDEDEAGPELQVSATR_	1.56811	0.698032	#DIV/0!	1.13307	54.2984
gi|472586930	RHTO_04607	43	DUF1212 family protein	1	74.5877	S	_LVIPDDS(ph)PPSSDSR_	4.69506	3.48736	2.59376	3.59206	29.3578
gi|472586930	RHTO_04607	566	DUF1212 family protein	1	77.5502	S	_SALST(ph)PPLS(ph)PGHEK_	3.79463	3.74223	4.12916	3.88868	5.39789
gi|472586930	RHTO_04607	130	DUF1212 family protein	0.985838	18.4285	S	_NLTS(ph)PGAQTELVR_	1.92263	#DIV/0!	2.42031	2.17147	16.2061
gi|472586930	RHTO_04607	595	DUF1212 family protein	1	130.007	S	_FGHS(ph)PGHGS(ph)PR_	1.66331	1.22416	2.04562	1.64436	24.9981
gi|472586930	RHTO_04607	600	DUF1212 family protein	1	130.007	S	_FGHS(ph)PGHGS(ph)PR_	1.66331	1.22416	2.04562	1.64436	24.9981
gi|472586930	RHTO_04607	562	DUF1212 family protein	0.955536	13.3284	T	_SALST(ph)PPLS(ph)PGHEK_	1.57196	1.21017	1.79565	1.52593	19.3616
gi|472585538	RHTO_07431	334	DUF159 domain protein	0.999896	45.3173	S	_S(ph)AS(ph)PPSASSLPVK_	6.03318	5.40979	3.64657	5.02985	24.6098
gi|472585538	RHTO_07431	332	DUF159 domain protein	0.999932	45.3173	S	_S(ph)AS(ph)PPSASSLPVK_	6.03318	5.40979	3.64657	5.02985	24.6098
gi|472588648	RHTO_00548	324	DUF1752 family protein	0.975016	15.8778	S	_RPAAVS(ph)PS(ph)PPTPEEVIR_	1.36236	#DIV/0!	0.651339	1.00685	49.9348
gi|472588648	RHTO_00548	322	DUF1752 family protein	0.992011	20.8294	S	_RPAAVS(ph)PS(ph)PPTPEEVIR_	1.36236	#DIV/0!	0.651339	1.00685	49.9348
gi|472588648	RHTO_00548	381	DUF1752 family protein	1	77.6441	S	_GFEPS(ph)PPQAR_	1.30307	0.768876	0.77997	0.950638	32.1114
gi|472588648	RHTO_00548	491	DUF1752 family protein	0.999999	60.2199	S	_KIFFISSPES(ph)DEEGSR_	1.09941	0.676224	0.201321	0.658984	68.1795
gi|472588648	RHTO_00548	487	DUF1752 family protein	0.87518	8.45365	S	_KIFFIS(ph)SPES(ph)DEEGSR_	1.09941	#DIV/0!	0.793021	0.946215	22.8963
gi|472584013	RHTO_01689	374	DUF1769 family protein	1	99.4692	S	_AQS(ph)VGVQYKPK_	4.88043	3.66542	3.54145	4.0291	18.3632
gi|472586867	RHTO_06390	479	DUF21 and CBS domain containing protein	0.996788	24.9222	S	_IASGS(ph)GANTPVR_	#DIV/0!	4.20858	1.61729	2.91293	62.903
gi|472586867	RHTO_06390	483	DUF21 and CBS domain containing protein	0.999999	59.6961	T	_IASGSGANT(ph)PVR_	1.25586	4.11083	3.05073	2.80581	51.4348
gi|472584223	RHTO_01476	979	DUF221 domain containing membrane protein	1	97.0627	S	_REDLLS(ph)DEEDDLDEEDEHGNIPAR_	2.64306	#DIV/0!	2.27733	2.46019	10.5115
gi|472582461	RHTO_03681	1070	DUF221 domain containing protein	0.775212	5.89938	T	_YAPLNPDGSEST(ph)EYLPQR_	#DIV/0!	0.411117	0.509347	0.460232	15.0922
gi|472584972	RHTO_00826	795	DUF221 domain containing protein	0.887198	9.22535	T	_TVET(ph)NDDTGT(ph)LPGDEHLDQNAFDHPAM(ox)YK_	4.40083	1.70736	1.47403	2.52741	64.3592
gi|472584972	RHTO_00826	789	DUF221 domain containing protein	0.80746	6.09495	T	_TVET(ph)NDDTGT(ph)LPGDEHLDQNAFDHPAM(ox)YK_	2.63692	1.65862	1.66287	1.98614	28.3767
gi|472584972	RHTO_00826	793	DUF221 domain containing protein	0.982299	17.5411	T	_TVETNDDT(ph)GTLPGDEHLDQNAFDHPAM(ox)YK_	1.26626	2.35888	1.47665	1.70059	34.0891
gi|472582461	RHTO_03681	849	DUF221 domain containing protein	0.999999	63.3784	T	_SGTPFNPGT(ph)PEELPAELQR_	1.02264	0.893256	0.831878	0.915925	10.632
gi|472582461	RHTO_03681	981	DUF221 domain containing protein	0.978637	16.2107	S	_SAS(ph)VDSY(ph)AGQWQPQHTAAR_	0.662164	0.83626	#DIV/0!	0.749212	16.4312
gi|472582461	RHTO_03681	1069	DUF221 domain containing protein	0.885315	9.09599	S	_YAPLNPDGSES(ph)TEYLPQR_	0.574251	0.500225	0.552273	0.542249	7.01098
gi|472586488	RHTO_06011	62	DUF2431 domain containing protein	1	95.9813	S	_RVS(ph)EEGAGIR_	0.469594	1.67543	0.401059	0.848696	84.4586
gi|472587567	RHTO_02790	346	DUF250 domain contaning protein	0.999426	32.4102	S	_SAPPSS(ph)PEIHGNR_	2.90757	2.18484	2.03724	2.37655	19.5982
gi|472586158	RHTO_06745	46	DUF250 domain membrane protein	1	84.9235	S	_KAS(ph)NVGPDGSLAR_	1.88818	3.43124	3.32989	2.8831	29.9371
gi|472583317	RHTO_02168	566	DUF251 domain membrane protein	0.942033	12.9872	T	_DLDGGITPPPPSNLHAQAYGNPLSPT(ph)QK_	2.64936	#DIV/0!	1.48342	2.06639	39.8979
gi|472583317	RHTO_02168	14	DUF251 domain membrane protein	1	100.931	S	_RPVS(ph)PAPALAAGR_	1.07064	1.05342	1.47425	1.19944	19.8553
gi|472584133	RHTO_01386	495	DUF2841 family protein	0.974021	15.7394	S	_SQSFAGPVTS(ph)AGR_	4.39986	3.89241	#DIV/0!	4.14614	8.65428
gi|472584133	RHTO_01386	488	DUF2841 family protein	0.999911	43.7445	S	_SQS(ph)FAGPVTSAGR_	0.499151	#DIV/0!	0.897424	0.698288	40.3303
gi|472588284	RHTO_00184	410	DUF300 family protein	1	70.5619	S	_AELAESHVPLS(ph)PR_	7.6693	3.56468	3.83039	5.02146	45.7426
gi|472580448	RHTO_06549	268	DUF3661 family vacuolar membrane protein	0.999987	48.8336	S	_RGFLDSHDDEDEES(ph)DHEGAGGR_	2.12897	#DIV/0!	1.29586	1.71242	34.4018
gi|472587306	RHTO_04985	398	DUF625 domain protein	0.907441	9.99322	S	_RFAAEQQALRS(ph)PS(ph)PS(ph)PSLSS(ph)PR_	0.887154	0.440025	0.693674	0.673617	33.2887
gi|472587306	RHTO_04985	393	DUF625 domain protein	0.936993	12.4785	S	_RFAAEQQALRS(ph)PS(ph)PS(ph)PSLSS(ph)PR_	0.887154	0.440025	0.693674	0.673617	33.2887
gi|472587306	RHTO_04985	391	DUF625 domain protein	0.99883	30.5329	S	_RFAAEQQALRS(ph)PS(ph)PS(ph)PSLSS(ph)PR_	0.887154	0.440025	0.693674	0.673617	33.2887
gi|472587306	RHTO_04985	389	DUF625 domain protein	0.999911	42.0865	S	_RFAAEQQALRS(ph)PS(ph)PS(ph)PSLSS(ph)PR_	0.887154	0.440025	0.693674	0.673617	33.2887
gi|472588549	RHTO_00449	318	DUF726 domain protein	0.996284	25.3741	S	_RTS(ph)EATLR_	1.07419	0.696185	0.707214	0.825864	26.0492
gi|472588549	RHTO_00449	21	DUF726 domain protein	0.992444	24.1957	S	_SSS(ph)TEPTASIFDSDLR_	0.553925	1.40469	1.84918	1.26927	51.8538
gi|472582089	RHTO_04083	343	DUF803 domain membrane protein	0.999777	36.5204	S	_LSLAS(ph)DCEGNERGPDAR_	#DIV/0!	1.66268	1.47076	1.56672	8.66169
gi|472586742	RHTO_06265	581	DUF803 domain membrane protein	0.999335	31.7734	S	_SAS(ph)PPLGSATYPR_	3.3653	3.34258	2.75505	3.15431	10.9678
gi|472582089	RHTO_04083	401	DUF803 domain membrane protein	1	135.062	S	_FALRNDDS(ph)EDEENEATGR_	1.22612	0.662164	1.02309	0.970459	29.4334
gi|472582955	RHTO_02565	237	DUF804 domain membrane protein	0.999993	51.6515	S	_HAAQATAVS(ph)PER_	2.15193	#DIV/0!	1.37849	1.76521	30.9822
gi|472586914	RHTO_04591	428	DUF805 domain membrane protein	0.839544	9.99257	S	_NPFDDPAAPDS(ph)SALDSPTKPGFAR_	#DIV/0!	1.58238	1.70914	1.64576	5.4463
gi|472583807	RHTO_01897	147	dynactin	0.832774	8.08713	S	_RPS(ph)SVAS(ph)STASTSNPPR_	#DIV/0!	0.830427	0.671456	0.750942	14.9691
gi|472583807	RHTO_01897	366	dynactin	1	119.922	S	_AVS(ph)PVKPPS(ph)VK_	2.27511	1.73397	1.59571	1.86826	19.2186
gi|472583807	RHTO_01897	372	dynactin	1	119.922	S	_AVS(ph)PVKPPS(ph)VK_	2.27511	1.73397	1.59571	1.86826	19.2186
gi|472583613	RHTO_02117	144	dynein intermediate chain, cytosolic	0.999262	31.3166	S	_ERETVDAGS(ph)PGADNLR_	3.20832	2.04633	2.15945	2.47137	25.9257
gi|472586897	RHTO_04574	5	dynein light chain LC8-type	1	130.435	S	_AADS(ph)QS(ph)DGT(ph)PAPEAPKPIIK_	2.38983	1.44179	1.40919	1.74694	31.8844
gi|472586897	RHTO_04574	7	dynein light chain LC8-type	1	130.435	S	_AADS(ph)QS(ph)DGT(ph)PAPEAPKPIIK_	1.83739	1.61907	1.07206	1.50951	26.1178
gi|472586897	RHTO_04574	10	dynein light chain LC8-type	1	130.435	T	_AADS(ph)QS(ph)DGT(ph)PAPEAPKPIIK_	1.40503	1.1362	0.944109	1.16178	19.9282
gi|472581677	RHTO_04401	30	E3 ubiquitin-protein ligase BRE1	0.999817	37.6995	S	_VTLVDPPS(ph)PHPSKK_	1.16217	0.853315	0.615385	0.876956	31.2624
gi|472585196	RHTO_08115	1820	E3 ubiquitin-protein ligase HUWE1	0.998649	28.6889	S	_QVDSEPLKS(ph)PLNQDGADSTDAAM(ox)GDAPTK_	1.25342	1.03545	0.568666	0.952512	36.7269
gi|472586340	RHTO_06927	650	E3 ubiquitin-protein ligase synoviolin	0.974328	18.7834	T	_AVATELAAESEPESAKT(ph)DEELTPR_	1.61025	0.976753	#DIV/0!	1.2935	34.631
gi|472588479	RHTO_00379	591	E3 ubiquitin-protein ligase Topors	1	91.812	T	_DQET(ph)PPPPVDPELR_	#DIV/0!	1.04982	1.06182	1.05582	0.803293
gi|472581961	RHTO_04204	108	E3 ubiquitin-protein ligase TRIP12	0.999999	64.4497	S	_AVS(ph)PPPATSR_	1.42935	0.864304	0.928678	1.07411	28.7982
gi|472581961	RHTO_04204	1491	E3 ubiquitin-protein ligase TRIP12	0.868067	8.32866	S	_GSTSTASPGS(ph)APSSKPR_	1.19636	#DIV/0!	0.666933	0.931646	40.1826
gi|472581961	RHTO_04204	1488	E3 ubiquitin-protein ligase TRIP12	0.938568	14.9766	S	_GSTSTAS(ph)PGSAPSSKPR_	0.956297	0.727326	0.680318	0.78798	18.7377
gi|472581961	RHTO_04204	1036	E3 ubiquitin-protein ligase TRIP12	0.827571	7.21471	S	_RSS(ph)PS(ph)RTPLPDGSTSGAAAPSGLSR_	0.508492	#DIV/0!	0.657117	0.582804	18.0324
gi|472581961	RHTO_04204	1040	E3 ubiquitin-protein ligase TRIP12	0.83294	7.56234	T	_RSS(ph)PSRT(ph)PLPDGSTSGAAAPSGLSR_	0.365323	#DIV/0!	0.657117	0.51122	40.3601
gi|472584983	RHTO_00837	275	E3 ubiquitin-protein ligase UBR7	0.880268	8.67355	S	_AKVDS(ph)SPQPASNPK_	#DIV/0!	3.07636	1.84863	2.46249	35.2541
gi|472584983	RHTO_00837	276	E3 ubiquitin-protein ligase UBR7	0.979722	16.8424	S	_AKVDSS(ph)PQPASNPK_	3.82044	#DIV/0!	1.74228	2.78136	52.8331
gi|472584983	RHTO_00837	10	E3 ubiquitin-protein ligase UBR7	0.986854	18.7545	S	_EALLFS(ph)PTR_	1.73641	#DIV/0!	1.47894	1.60768	11.3245
gi|472586998	RHTO_04676	36	E3 ubiquitin-protein ligase UHRF1	0.999587	34.0526	T	_AVAAEYT(ph)PEPSLK_	1.07214	1.93859	2.37637	1.7957	36.9633
gi|472582943	RHTO_02553	262	egghead protein (zeste-white 4 protein), glycosyltransferase family 2 protein	0.999976	49.2086	S	_ADSNYGDEKKDPAFVGGGSSYAPLAPGS(ph)PALGGPPK_	1.54947	0.519508	0.731208	0.933397	58.2751
gi|472582943	RHTO_02553	168	egghead protein (zeste-white 4 protein), glycosyltransferase family 2 protein	1	101.107	S	_EGS(ph)FGQHSGLESGR_	0.862441	0.565387	0.932401	0.786743	24.7686
gi|472582943	RHTO_02553	173	egghead protein (zeste-white 4 protein), glycosyltransferase family 2 protein	0.999861	38.5752	S	_YREGS(ph)FGQHS(ph)GLESGR_	0.730941	0.297203	0.786349	0.604831	44.2851
gi|472586193	RHTO_06780	1021	elongation factor 3	1	80.2797	S	_DTPIGTPGVATPASVET(ph)PVGS(ph)GDEAR_	3.02929	1.42302	1.65945	2.03725	42.5684
gi|472586193	RHTO_06780	1082	elongation factor 3	0.999996	55.0634	T	_TLAFLSSTVPGAVREPDT(ph)DS(ph)DEENPIHAQQK_	2.3615	1.49392	1.61082	1.82208	25.8381
gi|472586193	RHTO_06780	1084	elongation factor 3	1	66.912	S	_TLAFLSSTVPGAVREPDT(ph)DS(ph)DEENPIHAQQK_	2.3615	0.838926	1.61082	1.60375	47.4707
gi|472586193	RHTO_06780	1014	elongation factor 3	0.995305	24.275	S	_DTPIGTPGVATPAS(ph)VETPVGS(ph)GDEAR_	1.11834	#DIV/0!	1.14318	1.13076	1.55338
gi|472586193	RHTO_06780	1011	elongation factor 3	0.998738	29.0519	T	_DTPIGTPGVAT(ph)PASVET(ph)PVGSGDEAR_	0.907771	1.12085	1.47807	1.1689	24.653
gi|472586193	RHTO_06780	1017	elongation factor 3	0.999981	47.1068	T	_DTPIGTPGVATPASVET(ph)PVGS(ph)GDEAR_	0.724638	1.16518	1.14064	1.01015	24.5078
gi|472586193	RHTO_06780	1109	elongation factor 3	0.997245	26.0655	T	_SGTST(ph)PTIAGM(ox)R_	0.487852	0.966557	#DIV/0!	0.727205	46.5475
gi|472587418	RHTO_05097	384	elongation factor EF-1 alpha subunit	0.999941	42.255	S	_SGKS(ph)VEDLPK_	0.375982	0.338329	0.147046	0.287119	42.7555
gi|472587560	RHTO_02783	343	endonuclease III	1	85.5332	S	_VVVAS(ph)PAK_	0.784129	0.464209	0.643583	0.630641	25.4269
gi|472586600	RHTO_06123	21	endothelin-converting enzyme, metalloendopeptidase	0.999967	44.8536	S	_DEEQEPLLGSDARPADS(ph)DIAQDPSFGAR_	6.74491	6.95943	#DIV/0!	6.85217	2.21372
gi|472583109	RHTO_02378	75	enhancer of zeste	1	66.9286	S	_SQVPVS(ph)PK_	#DIV/0!	0.769112	0.711845	0.740479	5.46864
gi|472588423	RHTO_00323	444	enolase	1	87.1795	S	_GPNAAPLS(ph)RK_	#DIV/0!	0.592979	0.558566	0.575772	4.22633
gi|472583799	RHTO_01889	481	epidermal growth factor receptor substrate 15	0.983947	17.8779	S	_SLSPQATGGS(ph)AR_	#DIV/0!	2.05698	1.80917	1.93307	9.06472
gi|472583799	RHTO_01889	438	epidermal growth factor receptor substrate 15	1	72.1646	S	_SLS(ph)PQLT(ph)GQR_	4.46269	2.57752	1.97064	3.00362	43.2652
gi|472583799	RHTO_01889	474	epidermal growth factor receptor substrate 15	0.999076	32.1545	S	_SLS(ph)PQATGGSAR_	1.79388	1.80796	1.72322	1.77502	2.55834
gi|472583799	RHTO_01889	152	epidermal growth factor receptor substrate 15	0.985962	18.4655	S	_QSS(ph)LPPSNPR_	0.382044	0.653595	0.556514	0.530718	25.9274
gi|472583799	RHTO_01889	442	epidermal growth factor receptor substrate 15	1	97.1001	T	_SLSPQLT(ph)GQR_	0.087974	0.230049	0.357782	0.225268	59.9141
gi|472583799	RHTO_01889	478	epidermal growth factor receptor substrate 15	0.999361	31.9871	T	_SLSPQAT(ph)GGSAR_	0.0834167	0.103099	0.33761	0.174709	80.9459
gi|472587611	RHTO_02834	516	ESCRT-I complex subunit TSG101	0.860505	8.0184	T	_SLREQT(ph)AS(ph)PTPTPSEAGSTSTAPFR_	0.921574	1.58624	#DIV/0!	1.25391	37.4822
gi|472587611	RHTO_02834	518	ESCRT-I complex subunit TSG101	0.895737	10.8819	S	_SLREQT(ph)AS(ph)PTPTPSEAGSTSTAPFR_	0.921574	1.58624	#DIV/0!	1.25391	37.4822
gi|472587611	RHTO_02834	417	ESCRT-I complex subunit TSG101	0.99989	39.5873	S	_RAS(ph)IDSAR_	0.310424	#DIV/0!	0.48216	0.396292	30.643
gi|472587611	RHTO_02834	387	ESCRT-I complex subunit TSG101	0.999995	54.3953	S	_AYS(ph)PAPSVVAPR_	0.255297	0.672766	0.592242	0.506768	43.7026
gi|472588545	RHTO_00445	558	esterase / lipase	1	72.4486	S	_GEAELPPQLRPS(ph)DEDEEDEDLDADVESELDR_	3.93701	#DIV/0!	1.51946	2.72823	62.6584
gi|472582073	RHTO_04067	207	eukaryotic polypeptide chain release factor 3	0.987674	19.9584	S	_ASTPAAS(ph)KPGT(ph)PVAGKPAAAAAAEK_	#DIV/0!	0.458463	0.449701	0.454082	1.36448
gi|472582073	RHTO_04067	211	eukaryotic polypeptide chain release factor 3	0.999484	37.4709	T	_ASTPAAS(ph)KPGT(ph)PVAGKPAAAAAAEK_	0.61546	0.843455	0.449701	0.636205	31.0741
gi|472586393	RHTO_06980	339	eukaryotic translation initiation factor	0.999997	56.3306	S	_GSVERPGAES(ph)PVLTLR_	1.40497	0.940557	0.910249	1.08526	25.5507
gi|472586393	RHTO_06980	331	eukaryotic translation initiation factor	1	86.3379	S	_GS(ph)VERPGAES(ph)PVLTLR_	1.40497	1.1072	1.09118	1.20112	14.7133
gi|472586393	RHTO_06980	133	eukaryotic translation initiation factor	0.999479	33.4334	T	_KIT(ph)PSS(ph)TPAVER_	0.545435	1.32238	0.98464	0.950819	40.9728
gi|472586393	RHTO_06980	122	eukaryotic translation initiation factor	0.969725	15.0557	S	_KSS(ph)VGAIGDGR_	0.466157	0.710379	0.673401	0.616645	21.3464
gi|472588528	RHTO_00428	486	eukaryotic translation initiation factor 3 62 kda subunit	0.988039	19.3449	S	_ATS(ph)VSASEKEPETKR_	1.01881	0.681989	0.771307	0.824034	21.1751
gi|472587818	RHTO_03042	3	eukaryotic translation initiation factor 3 subunit 1	0.999803	38.6032	S	_GS(ph)DWDAS(ph)S(ph)SEEDTKKPLPPPVPAVK_	#DIV/0!	1.58839	0.704275	1.14633	54.5358
gi|472587818	RHTO_03042	8	eukaryotic translation initiation factor 3 subunit 1	0.996246	25.2621	S	_GSDWDAS(ph)S(ph)S(ph)EEDTKKPLPPPVPAVK_	3.45626	3.29587	0.928074	2.56007	55.2962
gi|472587818	RHTO_03042	10	eukaryotic translation initiation factor 3 subunit 1	0.997381	26.7993	S	_GSDWDAS(ph)S(ph)S(ph)EEDTKKPLPPPVPAVK_	3.45626	3.03767	1.38525	2.62639	41.6939
gi|472587818	RHTO_03042	9	eukaryotic translation initiation factor 3 subunit 1	0.997417	26.7993	S	_GSDWDAS(ph)S(ph)S(ph)EEDTKKPLPPPVPAVK_	3.45626	3.16416	1.38525	2.66856	42.0051
gi|472587411	RHTO_05090	812	eukaryotic translation initiation factor 3 subunit CLU1/TIF31	1	159.669	S	_AKVEEEQKS(ph)VEAELK_	0.757805	0.840124	0.56164	0.719857	19.8745
gi|472581745	RHTO_04470	261	exocyst complex component, exo70 subunit	0.999959	44.0847	S	_IGTDADS(ph)AKGAGASAR_	#DIV/0!	0.383936	0.442028	0.412982	9.94648
gi|472588644	RHTO_00544	137	exocyst complex component, exo84 subunit	1	142.391	S	_APS(ph)PAAQIGALAVK_	2.89444	3.04386	1.86853	2.60228	24.5869
gi|472588644	RHTO_00544	782	exocyst complex component, exo84 subunit	1	85.8373	S	_GRPAS(ph)GAGFAR_	0.308918	0.381694	#DIV/0!	0.345306	14.9027
gi|472584624	RHTO_00964	217	exocyst complex component, sec8 subunit	0.996813	26.8021	S	_RGPGAS(ph)GS(ph)SSPELAQK_	6.44164	2.56621	2.65689	3.88825	56.8835
gi|472584624	RHTO_00964	221	exocyst complex component, sec8 subunit	0.98804	20.0801	S	_RGPGASGSS(ph)S(ph)PELAQK_	2.37931	3.53145	3.31477	3.07518	19.911
gi|472584624	RHTO_00964	220	exocyst complex component, sec8 subunit	0.989462	20.7057	S	_RGPGASGSS(ph)S(ph)PELAQK_	2.30409	3.64551	2.94499	2.96486	22.6293
gi|472585262	RHTO_07686	68	fatty acid oxygenase PpoA	0.999982	47.4375	S	_ALS(ph)DAKPTK_	4.12303	2.76916	3.13126	3.34115	20.9782
gi|472585262	RHTO_07686	21	fatty acid oxygenase PpoA	0.984075	19.8675	S	_KQS(ph)SS(ph)FLSTIK_	1.79318	2.47911	1.7832	2.0185	19.7641
gi|472585262	RHTO_07686	19	fatty acid oxygenase PpoA	0.999595	33.02	S	_KQS(ph)SS(ph)FLSTIK_	1.79318	2.33514	2.11109	2.0798	13.0942
gi|472583528	RHTO_02032	1014	fatty acid synthase subunit beta, fungi type	0.999999	62.7794	S	_LSNVNDS(ph)GIK_	#DIV/0!	7.09421	4.41501	5.75461	32.9211
gi|472583283	RHTO_02200	192	F-box and WD repeat domain containing protein	0.966821	16.0955	S	_HSLLAGDPIASNSSPNPSATSSHPS(ph)PSAS(ph)PR_	0.773395	0.512531	#DIV/0!	0.642963	28.6888
gi|472582949	RHTO_02559	14	F-box domain contaning protein	0.981998	17.4055	S	_KGTVQAQLAS(ph)DGTDEPR_	1.93783	#DIV/0!	1.57948	1.75866	14.4084
gi|472581234	RHTO_05350	26	F-box domain, cyclin-like domain containg protein	1	149.521	S	_GPDGEPLS(ph)PPAIDR_	3.03444	2.65034	2.70563	2.7968	7.4245
gi|472586351	RHTO_06938	818	ferric reductase transmembrane component 2 precursor	0.997868	26.7765	S	_SSSPAGRPSFTSDLSDYS(ph)DGEGTPSRK_	0.81473	1.42824	1.06647	1.10315	27.9561
gi|472580455	RHTO_06556	544	ferric-chelate reductase	0.826312	5.75251	S	_AS(ph)S(ph)SEDLGGVQEVASPPLVLQSGRPDIAK_	1.31924	0.212571	1.15322	0.895011	66.682
gi|472580455	RHTO_06556	543	ferric-chelate reductase	0.84219	7.42406	S	_SETLVLGGS(ph)KAS(ph)S(ph)SEDLGGVQEVASPPLVLQSGRPDIAK_	1.20341	0.214133	0.553312	0.656952	76.5227
gi|472580455	RHTO_06556	545	ferric-chelate reductase	0.869307	5.86262	S	_SETLVLGGS(ph)KAS(ph)SS(ph)EDLGGVQEVASPPLVLQSGRPDIAK_	1.01802	0.407664	1.15322	0.859633	46.207
gi|472580455	RHTO_06556	540	ferric-chelate reductase	1	67.4028	S	_SETLVLGGS(ph)K_	1.01802	0.256331	0.901469	0.725273	56.5684
gi|472582883	RHTO_02493	235	FHA domain containing protein	0.808915	6.26677	S	_LQSVNLS(ph)DVEVVNNDSASR_	#DIV/0!	1.87273	2.65386	2.26329	24.4043
gi|472582883	RHTO_02493	177	FHA domain containing protein	0.998882	29.5039	S	_YNKEFADCS(ph)S(ph)DEEDIGATQAVEDK_	6.88705	1.68466	2.77024	3.78065	72.5915
gi|472582883	RHTO_02493	176	FHA domain containing protein	0.998882	29.5039	S	_YNKEFADCS(ph)S(ph)DEEDIGATQAVEDK_	6.88421	1.68466	2.77024	3.7797	72.5672
gi|472582883	RHTO_02493	330	FHA domain containing protein	0.819939	6.942	S	_STQSFDRPPS(ph)PVSPETLK_	3.82585	#DIV/0!	1.51632	2.67109	61.1392
gi|472583346	RHTO_02278	658	formin binding protein	1	67.023	S	_RLS(ph)RS(ph)S(ph)ELPYGEDAR_	2.7154	0.936505	#DIV/0!	1.82595	68.8883
gi|472583346	RHTO_02278	659	formin binding protein	1	75.822	S	_RLS(ph)RS(ph)S(ph)ELPYGEDAR_	2.7154	0.936505	#DIV/0!	1.82595	68.8883
gi|472583346	RHTO_02278	656	formin binding protein	1	82.2627	S	_RLS(ph)RS(ph)S(ph)ELPYGEDAR_	1.44275	0.936505	#DIV/0!	1.18963	30.0909
gi|472582745	RHTO_03335	385	Fps/Fes/Fer/CIP4 homology and SAFF domain protein	0.998778	31.6883	S	_YAS(ph)FSTPSDAPPVPRPEM(ox)GER_	1.04956	1.23903	#DIV/0!	1.1443	11.7084
gi|472582745	RHTO_03335	409	Fps/Fes/Fer/CIP4 homology and SAFF domain protein	0.895774	10.727	S	_RET(ph)DAS(ph)GSSDLLGGGPSGGGM(ox)PPPLEPQR_	1.01499	#DIV/0!	0.604778	0.809885	35.8156
gi|472582745	RHTO_03335	456	Fps/Fes/Fer/CIP4 homology and SAFF domain protein	1	84.8418	S	_RPS(ph)RAGT(ph)QLSDFDER_	0.792016	0.349382	0.272732	0.471377	59.4672
gi|472582745	RHTO_03335	406	Fps/Fes/Fer/CIP4 homology and SAFF domain protein	0.966259	16.2646	T	_RET(ph)DAS(ph)GSSDLLGGGPSGGGM(ox)PPPLEPQR_	0.627983	1.33085	0.604778	0.854537	48.2907
gi|472582745	RHTO_03335	433	Fps/Fes/Fer/CIP4 homology and SAFF domain protein	0.77218	5.65876	T	_RET(ph)DASGSSDLLGGGPSGGGM(ox)PPPLEPQRT(ph)GSGQQQEK_	0.627983	0.719166	#DIV/0!	0.673574	9.57222
gi|472582745	RHTO_03335	460	Fps/Fes/Fer/CIP4 homology and SAFF domain protein	0.999995	53.2697	T	_AGT(ph)QLSDFDER_	0.168865	0.243126	0.386802	0.266264	41.6113
gi|472580896	RHTO_05766	399	FY-rich domain containing protein	1	105.217	S	_ALSGETLEVVS(ph)DGPR_	#DIV/0!	1.23989	1.85939	1.54964	28.2679
gi|472584134	RHTO_01387	263	G2/mitotic-specific cyclin 1/2	1	129.772	S	_AALAELES(ph)AR_	2.16877	0.891663	1.20678	1.42241	46.7728
gi|472587282	RHTO_04961	587	GAF domain containing protein	1	69.8446	S	_KDS(ph)DIDST(ph)TSSVPASEIVAPR_	0.277924	0.312911	0.487424	0.35942	31.2245
gi|472583782	RHTO_01872	926	GATA transcription factor	0.998647	28.6879	S	_ESS(ph)AGAFQSTFK_	3.48955	2.64515	#DIV/0!	3.06735	19.4656
gi|472580888	RHTO_05758	470	GATA transcription factor	0.982854	18.1789	S	_SRS(ph)PATGSAAPSVADATSR_	0.443086	0.66024	0.867227	0.656851	32.2891
gi|472588464	RHTO_00364	407	GATA-binding factor 6-B	1	72.5852	S	_S(ph)RANS(ph)LEAVDRDAAVK_	1.45047	0.719269	0.806387	0.992043	40.2598
gi|472583999	RHTO_01675	314	GATA-binding transcription factor	0.914401	19.2246	S	_LTSPSSSSS(ph)VDS(ph)PAS(ph)ADDHKGALSSVLNEDGTR_	2.70841	#DIV/0!	1.61708	2.16274	35.6811
gi|472586439	RHTO_07026	664	GDP/GTP exchange factor Sec2p	0.999999	62.5058	S	_DGEDGKDGLGISGSGAPAS(ph)GEGEGVEAR_	2.07456	2.00449	#DIV/0!	2.03952	2.42933
gi|472586439	RHTO_07026	762	GDP/GTP exchange factor Sec2p	0.99971	35.4188	S	_TSPAPSATPS(ph)PPGS(ph)PR_	1.70381	1.23982	1.07462	1.33942	24.3542
gi|472586439	RHTO_07026	766	GDP/GTP exchange factor Sec2p	1	73.6159	S	_TSPAPSATPS(ph)PPGS(ph)PR_	1.70381	1.23982	1.07462	1.33942	24.3542
gi|472586439	RHTO_07026	638	GDP/GTP exchange factor Sec2p	0.999997	54.7555	S	_KVTDGIVS(ph)PGR_	1.49885	0.660415	0.854482	1.00458	43.6905
gi|472588640	RHTO_00540	378	GDP-mannose 4,6-dehydratase	1	91.8577	S	_KCS(ph)FDELVK_	3.73832	2.31863	1.42406	2.49367	46.7993
gi|472588640	RHTO_00540	28	GDP-mannose 4,6-dehydratase	1	103.221	S	_GGLS(ph)M(ox)HIK_	1.38791	1.45804	0.881756	1.24257	25.3052
gi|472585727	RHTO_07620	73	GDP-mannose 4,6-dehydratase	0.998689	28.9312	S	_RSS(ph)SFNTGR_	0.606538	0.561325	#DIV/0!	0.583932	5.47512
gi|472580775	RHTO_05800	271	geranylgeranyl transferase type-1 subunit beta	0.94472	12.1089	S	_QIRPPPPEPSDS(ph)S(ph)DEDEEQER_	1.57555	#DIV/0!	1.00588	1.29072	31.2085
gi|472580775	RHTO_05800	270	geranylgeranyl transferase type-1 subunit beta	0.953651	12.8742	S	_QIRPPPPEPSDS(ph)S(ph)DEDEEQER_	1.57555	#DIV/0!	1.00588	1.29072	31.2085
gi|472586825	RHTO_06348	784	glucan synthesis regulatory protein	0.995404	24.415	S	_TALVGES(ph)PTDDKPASGASALES(ph)PIEEVEVVSHRDE_	2.94881	#DIV/0!	1.19209	2.07045	59.9958
gi|472586825	RHTO_06348	769	glucan synthesis regulatory protein	0.948366	12.7617	S	_TALVGES(ph)PTDDKPAS(ph)GASALESPIEEVEVVSHRDE_	2.67208	2.16263	1.47903	2.10458	28.4447
gi|472585072	RHTO_07991	549	glucose repression mediator protein	0.912148	13.748	S	_RTS(ph)GTHHS(ph)PSNSIDHS(ph)PR_	1.79643	1.64688	1.40205	1.61512	12.3271
gi|472585072	RHTO_07991	557	glucose repression mediator protein	0.997546	27.1593	S	_RTS(ph)GTHHS(ph)PSNSIDHS(ph)PR_	1.79643	#DIV/0!	1.40205	1.59924	17.4374
gi|472585072	RHTO_07991	745	glucose repression mediator protein	0.824874	7.30078	S	_RRS(ph)S(ph)GSSHPGQPAAGEVKPEPVAAAPVPVK_	1.59068	1.48028	1.22615	1.43237	13.0503
gi|472585072	RHTO_07991	746	glucose repression mediator protein	0.824874	7.30078	S	_RRS(ph)S(ph)GSSHPGQPAAGEVKPEPVAAAPVPVK_	1.59068	#DIV/0!	1.22615	1.40842	18.3017
gi|472585294	RHTO_07718	26	glutamate dehydrogenase (NAD+)	0.999613	35.0664	S	_TPS(ph)PAHGTIK_	#DIV/0!	5.90807	1.19275	3.55041	93.9113
gi|472586572	RHTO_06095	574	glutamate-cysteine ligase catalytic subunit	0.885921	9.00372	S	_DASVAS(ph)SDYPASPTVCSSHAPSR_	1.90444	#DIV/0!	0.602265	1.25335	73.465
gi|472586572	RHTO_06095	580	glutamate-cysteine ligase catalytic subunit	0.976167	17.648	S	_DASVASSDYPAS(ph)PTVCSSHAPSR_	1.68342	#DIV/0!	0.626096	1.15476	64.7443
gi|472582607	RHTO_03521	162	glutamate-rich WD repeat containing protein	0.874571	8.4002	T	_T(ph)RRDPEESDGEDS(ph)DDDDTEDDPVLTFR_	#DIV/0!	0.684369	0.620463	0.652416	6.92633
gi|472582607	RHTO_03521	174	glutamate-rich WD repeat containing protein	1	81.7184	S	_RDPEES(ph)DGEDS(ph)DDDDTEDDPVLTFR_	1.49414	1.39999	0.79321	1.22911	30.9514
gi|472582607	RHTO_03521	169	glutamate-rich WD repeat containing protein	1	100.506	S	_RDPEES(ph)DGEDS(ph)DDDDTEDDPVLTFR_	1.18135	0.668181	0.83091	0.89348	29.3508
gi|472582607	RHTO_03521	7	glutamate-rich WD repeat containing protein	1	108.34	S	_RAS(ph)S(ph)PVGERPAAK_	1.1529	0.984252	0.863782	1.00031	14.518
gi|472582607	RHTO_03521	6	glutamate-rich WD repeat containing protein	1	108.34	S	_RAS(ph)S(ph)PVGERPAAK_	0.442929	0.929973	0.792896	0.721932	34.7896
gi|472583353	RHTO_02328	339	glutamine-fructose-6-phosphate transaminase	0.955276	13.7272	S	_KNDGTVS(ph)TIR_	3.92218	0.918949	0.799488	1.88021	94.1073
gi|472585094	RHTO_08013	65	glycerol-3-phosphate dehydrogenase (NAD+) (partial sequence c terminus)	1	104.802	S	_AAS(ph)PTAT(ph)PGS(ph)S(ph)RPPS(ph)PLLR_	7.77786	3.87657	3.91865	5.19103	43.1584
gi|472585094	RHTO_08013	53	glycerol-3-phosphate dehydrogenase (NAD+) (partial sequence c terminus)	0.999981	45.4389	S	_AAS(ph)PT(ph)ATPGS(ph)SRPPS(ph)PLLR_	7.35781	2.76503	2.77477	4.2992	61.6122
gi|472585094	RHTO_08013	37	glycerol-3-phosphate dehydrogenase (NAD+) (partial sequence c terminus)	1	83.9087	S	_AGS(ph)PLGFHIPSLPGSR_	6.75174	1.95225	1.74734	3.48377	81.291
gi|472585094	RHTO_08013	55	glycerol-3-phosphate dehydrogenase (NAD+) (partial sequence c terminus)	0.953365	13.2222	T	_AASPT(ph)ATPGSSRPPSPLLR_	5.69866	#DIV/0!	1.94761	3.82313	69.3774
gi|472585094	RHTO_08013	45	glycerol-3-phosphate dehydrogenase (NAD+) (partial sequence c terminus)	1	200.197	S	_AGS(ph)PLGFHIPS(ph)LPGS(ph)R_	3.00174	3.04331	2.97672	3.00726	1.1184
gi|472585094	RHTO_08013	61	glycerol-3-phosphate dehydrogenase (NAD+) (partial sequence c terminus)	1	96.5859	S	_AAS(ph)PTAT(ph)PGS(ph)S(ph)RPPS(ph)PLLR_	2.81073	2.1008	2.2478	2.38644	15.7021
gi|472585094	RHTO_08013	60	glycerol-3-phosphate dehydrogenase (NAD+) (partial sequence c terminus)	1	101.029	S	_AAS(ph)PTAT(ph)PGS(ph)S(ph)RPPS(ph)PLLR_	2.81073	2.73254	2.2478	2.59702	11.7424
gi|472585094	RHTO_08013	16	glycerol-3-phosphate dehydrogenase (NAD+) (partial sequence c terminus)	0.834222	5.54247	S	_APTRPEAVSTAS(ph)TES(ph)LHQLPSGAQTPAAEVPSR_	2.4299	1.16977	1.08884	1.56283	48.1169
gi|472585094	RHTO_08013	129	glycerol-3-phosphate dehydrogenase (NAD+) (partial sequence c terminus)	1	99.0441	S	_RGS(ph)S(ph)PALAPFLAK_	2.42489	0.163036	0.801475	1.1298	103.215
gi|472585094	RHTO_08013	128	glycerol-3-phosphate dehydrogenase (NAD+) (partial sequence c terminus)	1	99.0441	S	_RGS(ph)S(ph)PALAPFLAK_	2.34313	0.702346	0.26796	1.10448	99.0938
gi|472585094	RHTO_08013	57	glycerol-3-phosphate dehydrogenase (NAD+) (partial sequence c terminus)	0.999991	50.5129	T	_AAS(ph)PTAT(ph)PGS(ph)S(ph)RPPS(ph)PLLR_	1.69748	2.18107	2.45092	2.10982	18.0936
gi|472585094	RHTO_08013	94	glycerol-3-phosphate dehydrogenase (NAD+) (partial sequence c terminus)	1	78.0879	T	_EGQQDGS(ph)DDET(ph)DKEGDDGEKER_	1.64352	2.18217	1.21108	1.67892	28.9776
gi|472585094	RHTO_08013	90	glycerol-3-phosphate dehydrogenase (NAD+) (partial sequence c terminus)	1	78.0879	S	_EGQQDGS(ph)DDET(ph)DKEGDDGEKER_	1.64352	1.07058	2.35233	1.68881	38.0192
gi|472585094	RHTO_08013	108	glycerol-3-phosphate dehydrogenase (NAD+) (partial sequence c terminus)	1	105.839	S	_RPS(ph)LGES(ph)LSR_	1.57938	2.71621	1.99136	2.09565	27.4639
gi|472585094	RHTO_08013	49	glycerol-3-phosphate dehydrogenase (NAD+) (partial sequence c terminus)	1	200.197	S	_AGS(ph)PLGFHIPS(ph)LPGS(ph)R_	1.17265	1.51451	1.36718	1.35145	12.6881
gi|472585094	RHTO_08013	112	glycerol-3-phosphate dehydrogenase (NAD+) (partial sequence c terminus)	0.999978	46.4782	S	_RPS(ph)LGES(ph)LSR_	1.08162	#DIV/0!	1.83264	1.45713	36.4452
gi|472585094	RHTO_08013	26	glycerol-3-phosphate dehydrogenase (NAD+) (partial sequence c terminus)	0.998187	38.6504	T	_APTRPEAVSTASTESLHQLPS(ph)GAQT(ph)PAAEVPSR_	0.958497	1.07377	0.826788	0.953018	12.9673
gi|472585094	RHTO_08013	22	glycerol-3-phosphate dehydrogenase (NAD+) (partial sequence c terminus)	0.999864	38.9465	S	_APTRPEAVSTASTESLHQLPS(ph)GAQT(ph)PAAEVPSR_	0.926355	#DIV/0!	1.4368	1.18158	30.5473
gi|472585094	RHTO_08013	114	glycerol-3-phosphate dehydrogenase (NAD+) (partial sequence c terminus)	1	69.1338	S	_RPSLGESLS(ph)R_	0.597122	0.763242	0.952653	0.771006	23.0728
gi|472587834	RHTO_03058	848	glycerol-3-phosphate O-acyltransferase / dihydroxyacetone phosphate acyltransferase	0.997877	26.7209	S	_EQGRPDS(ph)PLPS(ph)PRPGLYR_	0.883314	#DIV/0!	0.536769	0.710041	34.5113
gi|472587834	RHTO_03058	844	glycerol-3-phosphate O-acyltransferase / dihydroxyacetone phosphate acyltransferase	0.999995	53.1501	S	_EQGRPDS(ph)PLPS(ph)PRPGLYR_	0.883314	#DIV/0!	0.536769	0.710041	34.5113
gi|472582071	RHTO_04065	649	glycogen(starch) synthase, glycosyltransferase family 3 protein	1	96.6729	S	_LPRPLS(ph)APAS(ph)PR_	10.8586	1.99984	2.96789	5.27544	92.1121
gi|472582071	RHTO_04065	645	glycogen(starch) synthase, glycosyltransferase family 3 protein	1	96.6729	S	_LPRPLS(ph)APAS(ph)PR_	2.6723	1.96213	1.9639	2.19944	18.6185
gi|472582071	RHTO_04065	444	glycogen(starch) synthase, glycosyltransferase family 3 protein	0.999368	31.9904	S	_RNS(ph)LPPVVTHNM(ox)ADDANDPILNQVR_	0.333656	1.0355	0.715205	0.694786	50.5718
gi|472583827	RHTO_01917	85	glycoside hydrolase family 5 protein	0.973011	15.5704	S	_STS(ph)IDLTPSR_	#DIV/0!	2.13602	2.03207	2.08404	3.52718
gi|472583827	RHTO_01917	129	glycoside hydrolase family 5 protein	1	108.713	S	_ERDLPNLPS(ph)S(ph)DDEEAEGLLGR_	1.45119	1.83019	1.85199	1.71112	13.1711
gi|472583827	RHTO_01917	130	glycoside hydrolase family 5 protein	1	108.713	S	_ERDLPNLPS(ph)S(ph)DDEEAEGLLGR_	1.31586	1.18549	1.47347	1.32494	10.8837
gi|472584130	RHTO_01383	155	glycosyl transferase family 2 protein	0.994464	22.5887	S	_RGS(ph)LSVATGQGR_	0.463542	#DIV/0!	5.8292	3.14637	120.586
gi|472582696	RHTO_03610	1124	glycosylphosphatidylinositol deacylase	0.998915	29.6369	S	_RCS(ph)S(ph)PPEPTDDLVGEGGVAR_	#DIV/0!	1.32158	1.39377	1.35767	3.75966
gi|472582696	RHTO_03610	1125	glycosylphosphatidylinositol deacylase	0.998915	29.6369	S	_RCS(ph)S(ph)PPEPTDDLVGEGGVAR_	#DIV/0!	1.32158	1.39377	1.35767	3.75966
gi|472580727	RHTO_05902	364	glycosyltransferase family 2 protein	0.816999	6.591	S	_ASS(ph)LSGEAGLPPYSR_	0.426348	1.97044	#DIV/0!	1.1984	91.1085
gi|472580727	RHTO_05902	177	glycosyltransferase family 2 protein	1	86.8164	S	_DAS(ph)AERAPPVPTPQDEDDIATLNFNR_	0.423048	0.516156	0.540103	0.493102	12.5408
gi|472587678	RHTO_02902	261	glycosyltransferase family 31 protein	0.998494	28.2194	S	_LGGTLAPETS(ph)PVIGR_	#DIV/0!	1.83604	1.21024	1.52314	29.0522
gi|472581774	RHTO_04263	22	glycosyltransferase family 32 protein	0.999899	41.6258	S	_SAS(ph)PTFFGSPPSSAVAEK_	1.50946	1.81396	2.25464	1.85935	20.15
gi|472581774	RHTO_04263	28	glycosyltransferase family 32 protein	0.999459	34.697	S	_SAS(ph)PTFFGS(ph)PPSSAVAEK_	1.07982	0.907853	1.30215	1.09661	18.0269
gi|472583466	RHTO_01969	402	glycosyltransferase family 32 protein	0.991203	20.4898	S	_RGTPGS(ph)RPGS(ph)PFGLR_	0.615877	0.821625	#DIV/0!	0.718751	20.2415
gi|472583466	RHTO_01969	406	glycosyltransferase family 32 protein	0.997142	25.0653	S	_GTPGS(ph)RPGS(ph)PFGLR_	0.615877	0.821625	#DIV/0!	0.718751	20.2415
gi|472580879	RHTO_05749	776	glycosyltransferase family 8 protein	0.82768	7.02998	S	_LTAS(ph)GSGTGDAPPLLR_	#DIV/0!	0.382321	0.695555	0.538938	41.0974
gi|472580879	RHTO_05749	656	glycosyltransferase family 8 protein	0.969924	15.0852	S	_AVDKGELS(ph)PTNR_	#DIV/0!	1.256	2.49732	1.87666	46.7717
gi|472580879	RHTO_05749	720	glycosyltransferase family 8 protein	0.999857	38.8113	S	_S(ph)PHYVVASPAAFANAAQTS(ph)PR_	#DIV/0!	1.0402	0.776036	0.90812	20.5694
gi|472580879	RHTO_05749	349	glycosyltransferase family 8 protein	0.999999	61.6786	S	_AAS(ph)PPHLTWDPAR_	2.46926	2.92989	1.90927	2.43614	20.9805
gi|472580879	RHTO_05749	658	glycosyltransferase family 8 protein	0.936231	11.6677	T	_AVDKGELSPT(ph)NR_	2.25627	3.82365	#DIV/0!	3.03996	36.458
gi|472580879	RHTO_05749	714	glycosyltransferase family 8 protein	0.835308	7.05176	S	_YVPTS(ph)PR_	1.5082	#DIV/0!	1.19633	1.35227	16.3081
gi|472580879	RHTO_05749	727	glycosyltransferase family 8 protein	0.946992	13.1433	S	_SPHYVVAS(ph)PAAFANAAQTS(ph)PR_	1.41945	0.658458	0.78883	0.955578	42.5895
gi|472580879	RHTO_05749	738	glycosyltransferase family 8 protein	0.994355	22.5757	S	_S(ph)PHYVVASPAAFANAAQTS(ph)PR_	1.33962	0.575838	0.680226	0.865228	47.8646
gi|472580879	RHTO_05749	757	glycosyltransferase family 8 protein	0.999907	40.3058	S	_LQM(ox)PVSPASGALS(ph)PR_	1.13692	0.967118	#DIV/0!	1.05202	11.4131
gi|472580879	RHTO_05749	696	glycosyltransferase family 8 protein	0.999388	31.5287	S	_TPTTASGVS(ph)APTS(ph)PTR_	0.753409	2.6855	1.11731	1.51874	67.6019
gi|472580879	RHTO_05749	700	glycosyltransferase family 8 protein	0.81438	6.4596	S	_SGQKTPT(ph)TASGVSAPT(ph)S(ph)PTR_	0.700771	1.08307	2.39469	1.39285	63.7855
gi|472580879	RHTO_05749	699	glycosyltransferase family 8 protein	0.863696	11.2475	T	_SGQKTPT(ph)TASGVSAPT(ph)S(ph)PTR_	0.499326	#DIV/0!	1.18028	0.839801	57.3355
gi|472580879	RHTO_05749	551	glycosyltransferase family 8 protein	0.999948	42.8746	S	_SGS(ph)AASSLSITR_	0.468318	0.305829	0.312598	0.362248	25.3753
gi|472580879	RHTO_05749	567	glycosyltransferase family 8 protein	0.999816	39.1294	S	_RDS(ph)GPGPGAAGAVASGATAATAAATR_	0.350521	1.20065	#DIV/0!	0.775587	77.5071
gi|472580991	RHTO_05682	45	glycosyltransferase family 90 protein	0.999786	39.1892	S	_IGS(ph)PDSSKSDSPLLK_	1.53466	1.40607	1.93772	1.62615	17.0575
gi|472585851	RHTO_07127	59	glyoxylate pathway regulator	1	86.9106	T	_NIT(ph)PGGHPLDR_	1.22603	1.01453	0.55732	0.932627	36.6487
gi|472588490	RHTO_00390	734	golgi apyrase	0.996123	26.6104	S	_STS(ph)GSALASYGPR_	#DIV/0!	1.13223	0.167216	0.649725	105.025
gi|472585342	RHTO_07766	260	Golgi to Endosome transporter	0.889427	9.7382	S	_RATSPS(ph)AAAGAAASAR_	#DIV/0!	1.01086	1.08883	1.04984	5.25156
gi|472585342	RHTO_07766	257	Golgi to Endosome transporter	0.950339	12.8187	T	_AT(ph)SPSAAAGAAASAR_	#DIV/0!	1.70166	1.56914	1.6354	5.72982
gi|472585342	RHTO_07766	307	Golgi to Endosome transporter	1	88.0706	T	_QPEVNLFDFDDDEDQKQPT(ph)PPPK_	3.78286	4.89141	4.04449	4.23959	13.6677
gi|472585342	RHTO_07766	258	Golgi to Endosome transporter	0.950804	12.8638	S	_ATS(ph)PSAAAGAAASAR_	2.50313	1.4059	1.43744	1.78216	35.0463
gi|472587304	RHTO_04983	752	G-patch and DUF1604 domain containing protein	0.99942	35.3875	S	_VRPTLETVGYGDDES(ph)QGQEIVDEQK_	#DIV/0!	1.3684	1.65736	1.51288	13.5056
gi|472583702	RHTO_01792	378	G-patch domain protein	0.999983	50.0089	S	_RPS(ph)RS(ph)PPPSSSSSSR_	2.33068	1.21675	1.29308	1.6135	38.566
gi|472583702	RHTO_01792	376	G-patch domain protein	0.999997	59.4057	S	_RPS(ph)RS(ph)PPPSSSSSSR_	2.33068	1.21675	1.29308	1.6135	38.566
gi|472581652	RHTO_04376	951	GPCR, family 3, metabotropic glutamate receptor 5	0.98085	16.5093	S	_NRPPSVPT(ph)S(ph)PVGGQAPALPGK_	3.59842	0.172497	1.79054	1.85382	92.449
gi|472581652	RHTO_04376	947	GPCR, family 3, metabotropic glutamate receptor 5	0.999303	30.5387	S	_NRPPS(ph)VPTS(ph)PVGGQAPALPGK_	2.76732	3.12168	0.535303	2.14144	65.479
gi|472581652	RHTO_04376	313	GPCR, family 3, metabotropic glutamate receptor 5	1	84.6146	S	_KS(ph)PQLR_	1.27732	1.20546	0.936417	1.13973	15.7672
gi|472581652	RHTO_04376	950	GPCR, family 3, metabotropic glutamate receptor 5	0.876375	8.40987	T	_NRPPSVPT(ph)S(ph)PVGGQAPALPGK_	0.903587	0.468099	0.254285	0.54199	61.0524
gi|472581652	RHTO_04376	230	GPCR, family 3, metabotropic glutamate receptor 5	0.999999	63.3706	S	_RASNSSASSTGPSTAPVAAAPS(ph)PR_	0.314911	0.764994	0.403959	0.494621	48.1874
gi|472588315	RHTO_00215	273	gram domain protein	0.774112	6.43291	S	_SSS(ph)INSQQQPDNLSLRPPGSVSPAR_	#DIV/0!	0.328677	0.863558	0.596117	63.4469
gi|472588315	RHTO_00215	265	gram domain protein	0.997157	25.4503	S	_AAS(ph)RPLSR_	#DIV/0!	0.328677	0.738825	0.533751	54.3359
gi|472588315	RHTO_00215	269	gram domain protein	0.999997	55.2105	S	_AASRPLS(ph)R_	#DIV/0!	0.818666	1.16898	0.99382	24.9247
gi|472583045	RHTO_02655	241	GTP binding protein	0.990047	22.9873	S	_STKAPS(ph)PELQQAPYEIEPLTR_	#DIV/0!	0.536653	0.310636	0.423645	37.7246
gi|472583045	RHTO_02655	162	GTP binding protein	0.997825	27.628	S	_SSS(ph)PGAPLM(ox)PVR_	4.54731	1.28337	2.25327	2.69465	62.2026
gi|472583045	RHTO_02655	701	GTP binding protein	0.999472	34.4619	S	_AAETTTPASHVEAS(ph)PVLSR_	1.3303	0.41176	0.532879	0.758313	65.8097
gi|472583045	RHTO_02655	136	GTP binding protein	0.999615	34.1612	S	_ASGEQDEPVKENS(ph)NPSELNELALGR_	0.87146	0.512059	0.660415	0.681311	26.5091
gi|472583045	RHTO_02655	272	GTP binding protein	0.998228	29.5733	S	_ESAPSAYYELPRDDAS(ph)PQLASSAK_	0.798594	0.332049	0.431425	0.52069	47.1967
gi|472583045	RHTO_02655	125	GTP binding protein	0.999989	49.9943	S	_RAS(ph)GEQDEPVKENSNPSELNELALGR_	0.775374	0.724113	0.508958	0.669482	21.115
gi|472586222	RHTO_06809	106	GTP cyclohydrolase I	1	80.6095	S	_VGS(ph)PIPDKHGLGWPGK_	0.631433	1.00844	0.626763	0.755545	28.9891
gi|472587274	RHTO_04953	104	GTP cyclohydrolase II	0.890285	9.67565	S	_AALNAS(ph)PPGPSTSPPAQRPK_	1.30334	0.892061	0.829187	1.0082	25.5434
gi|472585556	RHTO_07449	91	GTP cyclohydrolase II	0.999221	32.0756	S	_ATDTPLS(ph)PSLPAR_	0.918274	0.589727	0.820883	0.776295	21.738
gi|472582215	RHTO_03955	239	GTPase activating protein	1	195.773	S	_RKS(ph)LEEGEIVQEPEEM(ox)EGQER_	2.19568	1.69471	1.26731	1.71924	27.0276
gi|472583947	RHTO_01623	354	GTPase activating protein	0.949809	13.772	S	_TSILHQSS(ph)PVSR_	1.91501	#DIV/0!	1.11516	1.51509	37.3298
gi|472582215	RHTO_03955	215	GTPase activating protein	0.999999	60.031	S	_GAS(ph)YLAGASK_	0.642632	0.681106	1.04663	0.790122	28.2199
gi|472586745	RHTO_06268	87	GTPase activating protein	0.997814	28.6243	S	_TTSLAPSSTHDS(ph)PEQSR_	0.151791	1.0887	0.828363	0.689617	70.1284
gi|472581536	RHTO_05217	535	GTPase binding protein Rid1	0.999509	33.5071	S	_TAS(ph)ATSILLR_	1.28548	0.777605	0.885191	0.982758	27.2321
gi|472581536	RHTO_05217	384	GTPase binding protein Rid1	0.996897	25.0693	S	_SSS(ph)LGAGLK_	0.83661	0.813074	0.695217	0.781634	9.69236
gi|472581693	RHTO_04417	263	GTPase inhibitor	1	41.8178	S	_GGAAPGEGRPEKPES(ph)DDDS(ph)GDS(ph)EDDQS(ph)FVGGGRR_	6.94734	3.01051	0.764877	3.57424	87.5583
gi|472581693	RHTO_04417	259	GTPase inhibitor	1	41.8178	S	_GGAAPGEGRPEKPES(ph)DDDS(ph)GDS(ph)EDDQS(ph)FVGGGRR_	6.40985	5.77434	2.17505	4.78641	47.7126
gi|472581693	RHTO_04417	266	GTPase inhibitor	1	41.8178	S	_GGAAPGEGRPEKPES(ph)DDDS(ph)GDS(ph)EDDQS(ph)FVGGGRR_	2.72324	2.37693	1.42918	2.17645	30.7802
gi|472581693	RHTO_04417	226	GTPase inhibitor	0.99729	25.664	S	_VGYDAS(ph)PASGQFASR_	2.45736	#DIV/0!	0.634518	1.54594	83.3762
gi|472581687	RHTO_04411	314	guanine nucleotide binding protein (G protein), alpha o polypeptide	0.846728	7.42295	S	_FVSLNQS(ph)TAK_	0.855505	0.557476	#DIV/0!	0.70649	29.8289
gi|472583092	RHTO_02360	1081	guanine nucleotide exchange factor	0.975628	15.614	S	_LSSTQDDFS(ph)PPTS(ph)PVEPR_	#DIV/0!	0.834725	0.935104	0.884914	8.02099
gi|472583092	RHTO_02360	1077	guanine nucleotide exchange factor	0.999281	30.7012	S	_LSSTQDDFS(ph)PPT(ph)SPVEPR_	1.23822	1.61676	1.43213	1.42904	13.2459
gi|472583092	RHTO_02360	1080	guanine nucleotide exchange factor	0.845147	7.36645	T	_LSSTQDDFS(ph)PPT(ph)SPVEPR_	1.23822	0.886211	#DIV/0!	1.06222	23.433
gi|472582762	RHTO_03352	982	guanine nucleotide exchange factor LTE1	1	88.9446	S	_IELDDLDDS(ph)DEDEDVIEAKR_	0.809651	#DIV/0!	0.557258	0.683455	26.1127
gi|472584852	RHTO_00706	240	guanine nucleotide exchange factor Vps9	0.81021	6.30331	S	_SSNRPSPSSSTTSTPQPGSS(ph)PQR_	2.8664	#DIV/0!	2.1015	2.48395	21.7743
gi|472584852	RHTO_00706	633	guanine nucleotide exchange factor Vps9	0.864275	8.04016	T	_QLASEEPPPPPPPHDPPT(ph)PSR_	0.883626	#DIV/0!	0.47019	0.676908	43.1881
gi|472586836	RHTO_06359	382	guanine nucleotide exchange factor, Ric8	0.891492	9.63307	S	_TSS(ph)PARSPESSTTTAAASTSK_	2.68046	0.429	#DIV/0!	1.55473	102.399
gi|472587871	RHTO_03095	72	GYF domain containing protein	0.788653	8.77697	S	_NKVTTEGYDS(ph)DS(ph)S(ph)AES(ph)DGGFGGAGGGR_	#DIV/0!	1.83564	0.587234	1.21144	72.8685
gi|472587871	RHTO_03095	73	GYF domain containing protein	0.935368	13.8857	S	_NKVTTEGYDS(ph)DSS(ph)AESDGGFGGAGGGR_	#DIV/0!	1.08978	0.587234	0.838505	42.3791
gi|472587871	RHTO_03095	70	GYF domain containing protein	0.957443	15.8115	S	_NKVTTEGYDS(ph)DSSAES(ph)DGGFGGAGGGR_	#DIV/0!	1.1334	0.552853	0.843127	48.689
gi|472587871	RHTO_03095	76	GYF domain containing protein	0.999993	52.9477	S	_NKVTTEGYDS(ph)DSSAES(ph)DGGFGGAGGGR_	#DIV/0!	1.17876	0.552853	0.865806	51.118
gi|472585966	RHTO_07242	488	GYF domain containing protein	1	70.2239	S	_TGDSEKPFLAPS(ph)PR_	1.47174	1.08368	0.790576	1.11533	30.6349
gi|472585966	RHTO_07242	236	GYF domain containing protein	0.979901	16.88	S	_SPS(ph)IEKEGVLGSAGR_	1.14322	#DIV/0!	1.23877	1.191	5.67293
gi|472585966	RHTO_07242	229	GYF domain containing protein	0.999972	45.6485	S	_ALGS(ph)PSIRS(ph)PSIEK_	1.06296	#DIV/0!	0.207499	0.635229	95.2257
gi|472585966	RHTO_07242	806	GYF domain containing protein	0.777013	5.01535	S	_AS(ph)SPIAAPQQVDAPAVPEAESSPS(ph)PAPSASSK_	0.875044	0.93985	0.630676	0.81519	20.001
gi|472585966	RHTO_07242	521	GYF domain containing protein	1	72.7516	T	_AQT(ph)PLEQLTSAVSQGR_	0.595061	0.64771	0.369031	0.537267	27.5573
gi|472584915	RHTO_00769	349	HAD-superfamily hydrolase, subfamily IIB	1	83.6332	S	_LNPDHLS(ph)M(ox)LDER_	2.42131	#DIV/0!	0.592277	1.50679	85.8327
gi|472582959	RHTO_02569	606	heat shock 70kDa protein 1/8	0.868722	8.20689	S	_ALERLEIEDSS(ph)ADELRR_	2.498	0.4823	0.645911	1.20874	92.6196
gi|472582959	RHTO_02569	605	heat shock 70kDa protein 1/8	0.945733	12.4123	S	_ALERLEIEDS(ph)SADELRR_	0.968429	1.83969	1.63741	1.48184	30.7716
gi|472582959	RHTO_02569	575	heat shock 70kDa protein 1/8	1	76.3043	S	_QELESYVASVEATLQS(ph)PEASK_	0.517036	0.252538	0.267344	0.345639	42.9982
gi|472585892	RHTO_07168	300	Heat shock factor (HSF)-type transcription factor	0.951128	13.4755	S	_ASIAAAANLPARDSS(ph)TS(ph)PQPLR_	7.64059	1.89168	2.61869	4.05032	77.2887
gi|472585892	RHTO_07168	298	Heat shock factor (HSF)-type transcription factor	0.958373	16.2769	S	_ASIAAAANLPARDSS(ph)TS(ph)PQPLR_	7.64059	#DIV/0!	2.42377	5.03218	73.3051
gi|472585892	RHTO_07168	1167	Heat shock factor (HSF)-type transcription factor	1	80.6615	S	_HVAPYFS(ph)EPGR_	3.35683	2.28822	1.42179	2.35561	41.1477
gi|472587097	RHTO_04775	886	heat shock protein/chaperonin	1	99.5681	S	_LVVVPNHEPS(ph)VR_	9.42774	8.4538	2.5264	6.80265	54.9083
gi|472586274	RHTO_06861	102	heat shock transcription factor	0.999998	58.111	S	_GFS(ph)APVATGGK_	5.75506	5.67118	4.94951	5.45859	8.1131
gi|472584176	RHTO_01429	713	heat shock transcription factor	1	72.0044	S	_KSDALGAQSPAASEGGAAS(ph)PEEAAAGTR_	1.59441	1.6114	1.19788	1.4679	15.941
gi|472586274	RHTO_06861	568	heat shock transcription factor	1	63.9541	S	_APHAATEQATSYPS(ph)PR_	0.954198	0.597407	1.0209	0.857501	26.5543
gi|472584329	RHTO_01138	369	helicase SWR1	1	99.2153	S	_DDLPPLS(ph)PR_	1.40859	1.37754	1.45083	1.41232	2.60467
gi|472587919	RHTO_03143	499	high-glucose-regulated protein 8	0.999999	59.8793	S	_VLS(ph)PVVSAFGGAR_	0.368121	#DIV/0!	0.302407	0.335264	13.8597
gi|472586756	RHTO_06279	68	histone acetylation-related protein	1	85.4582	S	_RLS(ph)EAST(ph)NSSQQLK_	0.394011	0.557041	0.902609	0.617887	42.0305
gi|472588682	RHTO_00582	122	Histone chaperone domain CHZ domain protein	0.999989	50.2097	T	_KVDYAALDNGAEEDDEEDEGDVT(ph)VDEETAR_	2.21961	2.558	2.77678	2.51813	11.1478
gi|472585964	RHTO_07240	394	histone deacetylase 1/2	0.998056	27.1047	S	_QTGGGS(ph)APS(ph)VQS(ph)QPIPR_	1.51671	1.00834	1.061	1.19535	23.3866
gi|472585964	RHTO_07240	397	histone deacetylase 1/2	1	77.974	S	_QTGGGS(ph)APS(ph)VQS(ph)QPIPR_	1.51671	1.02565	1.061	1.20112	22.8023
gi|472585964	RHTO_07240	400	histone deacetylase 1/2	1	86.7517	S	_QTGGGS(ph)APS(ph)VQS(ph)QPIPR_	1.51671	1.02565	1.061	1.20112	22.8023
gi|472581562	RHTO_04482	582	Histone deacetylation protein Rxt3	0.999932	41.7038	S	_RRS(ph)DASEQQQATAPPAR_	1.96167	1.83157	1.41074	1.73466	16.6009
gi|472581562	RHTO_04482	600	Histone deacetylation protein Rxt3	1	85.7741	S	_QKS(ph)VT(ph)PPPLAPPLFTHIEAR_	1.75254	2.2843	1.20751	1.74812	30.7994
gi|472581562	RHTO_04482	602	Histone deacetylation protein Rxt3	1	85.9122	T	_QKS(ph)VT(ph)PPPLAPPLFTHIEAR_	1.75254	2.2843	1.20751	1.74812	30.7994
gi|472585003	#N/A	26	histone H3B, partial	0.966007	14.5531	S	_KPAS(ph)TAGKAPASK_	0.859697	0.0358153	0.745879	0.547131	81.5992
gi|472585003	#N/A	34	histone H3B, partial	1	92.1898	S	_APAS(ph)KAPAGK_	0.544455	0.563952	0.717412	0.608606	15.5653
gi|472584175	RHTO_01428	172	Histone H4 acetyltransferase, NuA4 complex, Eaf6 family protein	1	68.7055	S	_SAEHTASASVEPES(ph)DEDGASFR_	0.567215	0.978378	0.854847	0.800147	26.3663
gi|472587321	RHTO_05000	136	histone-like transcription factor (CBF/NF-Y)	1	59.1628	T	_AVPKDEDDEEEARET(ph)DEEDKPAAK_	1.41858	#DIV/0!	1.24964	1.33411	8.95417
gi|472584555	RHTO_00895	131	histone-lysine N-methyltransferase	0.94683	13.8598	S	_ATHVISLS(ph)DTS(ph)DESAGEATAAGR_	3.74336	1.21101	#DIV/0!	2.47718	72.2855
gi|472586498	RHTO_06021	53	histone-lysine N-methyltransferase ASH1L	0.899492	11.2729	S	_SQREES(ph)VESALTELS(ph)EDGGHGADAVEPEER_	#DIV/0!	1.48098	1.00385	1.24242	27.1549
gi|472586498	RHTO_06021	110	histone-lysine N-methyltransferase ASH1L	0.886168	9.6763	S	_SSGS(ph)SEPAAFEAAPPKR_	2.26475	1.34043	#DIV/0!	1.80259	36.2586
gi|472586498	RHTO_06021	62	histone-lysine N-methyltransferase ASH1L	0.99539	23.8484	S	_SQREES(ph)VESALTELS(ph)EDGGHGADAVEPEER_	1.44105	1.48098	1.44586	1.45596	1.49712
gi|472586498	RHTO_06021	14	histone-lysine N-methyltransferase ASH1L	0.883019	8.77855	T	_AVTAVT(ph)SPIK_	0.890076	0.498952	0.86423	0.751086	29.1227
gi|472586221	RHTO_06808	534	histone-lysine N-methyltransferase SETD1	1	65.4967	S	_AS(ph)PISAFPDAVSAAK_	#DIV/0!	1.6159	0.948947	1.28242	36.7747
gi|472586221	RHTO_06808	1075	histone-lysine N-methyltransferase SETD1	1	70.4884	S	_RLS(ph)LDAVK_	1.96125	2.12269	1.98346	2.02247	4.32672
gi|472586221	RHTO_06808	138	histone-lysine N-methyltransferase SETD1	0.994966	23.1885	S	_RAPS(ph)PSSSR_	1.4799	#DIV/0!	1.07817	1.27904	22.2097
gi|472586221	RHTO_06808	988	histone-lysine N-methyltransferase SETD1	0.999996	55.4587	S	_FSSEAPSESLHDHS(ph)EGEAEPR_	1.39805	0.861178	0.915667	1.0583	27.9216
gi|472583153	RHTO_02423	1007	histone-lysine N-methyltransferase SUV420H	0.999703	35.2764	S	_LTS(ph)PIVAPDGVR_	2.37547	1.54147	1.17507	1.69734	36.2442
gi|472585191	RHTO_08110	238	homeobox protein OTX	0.9997	38.2703	S	_GTASTS(ph)VS(ph)PDPPEPASAK_	3.53419	2.4985	#DIV/0!	3.01635	24.2792
gi|472585191	RHTO_08110	236	homeobox protein OTX	0.954934	13.8053	S	_GTASTS(ph)VS(ph)PDPPEPASAK_	3.10135	2.4985	#DIV/0!	2.79993	15.2247
gi|472582983	RHTO_02593	532	homeobox protein YOX1/YHP1	0.996578	23.6618	S	_KPLPSS(ph)S(ph)PAR_	33.7018	34.9223	50.8285	39.8175	23.9977
gi|472587852	RHTO_03076	876	Homeodomain-like	0.96312	14.1689	S	_LPS(ph)PSAVNQELVQPR_	#DIV/0!	1.62829	1.45951	1.5439	7.73012
gi|472587852	RHTO_03076	824	Homeodomain-like	1	90.8606	S	_IEQPPS(ph)PPAR_	0.861772	#DIV/0!	1.86254	1.36216	51.9509
gi|472580434	RHTO_06535	499	Homeodomain-like containing protein	0.990892	24.5152	S	_RATATGGNDDPDYLPS(ph)PPSAAQGASSSSK_	#DIV/0!	1.46265	1.68206	1.57235	9.86697
gi|472586392	RHTO_06979	464	homocitrate synthase	1	65.8551	S	_FDELLAEHKS(ph)QNGS(ph)EAGDEPAAKK_	6.56728	2.024	1.69147	3.42759	79.4767
gi|472586392	RHTO_06979	460	homocitrate synthase	1	65.8551	S	_FDELLAEHKS(ph)QNGS(ph)EAGDEPAAKK_	2.40206	4.70987	2.63338	3.24844	39.1239
gi|472586392	RHTO_06979	440	homocitrate synthase	0.898383	9.46497	S	_HVSS(ph)GALGLR_	1.30477	1.17682	0.421443	0.967676	49.3304
gi|472587238	RHTO_04917	312	homoserine o-acetyltransferase	0.890449	14.8551	S	_AEAQHNDGHQPFAGSSRPAS(ph)PPLSTAK_	0.161713	0.100283	0.10357	0.121855	28.3589
gi|472585230	RHTO_08149	341	hydroxymethylbilane synthase	1	72.2797	S	_DGPPVAVS(ph)PEQVSDFVK_	1.08408	1.70346	0.955657	1.24773	32.047
gi|472585230	RHTO_08149	401	hydroxymethylbilane synthase	1	108.416	S	_TLPAAPIS(ph)PR_	0.568473	0.476213	0.488902	0.511196	9.78238
gi|472582051	RHTO_04045	510	hydroxymethylglutaryl-CoA reductase (NADPH)	0.925683	11.9804	T	_LLDDPNAFRDADAQAS(ph)DDDEEAPT(ph)PTLTLR_	#DIV/0!	1.59765	2.35134	1.97449	26.9911
gi|472582051	RHTO_04045	787	hydroxymethylglutaryl-CoA reductase (NADPH)	0.998247	28.8443	S	_RDS(ph)DS(ph)SDESAPGSPILIR_	1.87098	#DIV/0!	1.2678	1.56939	27.1771
gi|472582051	RHTO_04045	785	hydroxymethylglutaryl-CoA reductase (NADPH)	0.999995	57.1513	S	_RDS(ph)DS(ph)SDESAPGSPILIR_	1.84451	#DIV/0!	1.2678	1.55615	26.2054
gi|472582051	RHTO_04045	367	hydroxymethylglutaryl-CoA reductase (NADPH)	1	91.1921	S	_AVFSNPAIGPGGAYAGAAS(ph)R_	1.25252	2.73471	1.63514	1.87412	41.0566
gi|472582051	RHTO_04045	502	hydroxymethylglutaryl-CoA reductase (NADPH)	0.999953	43.5392	S	_LLDDPNAFRDADAQAS(ph)DDDEEAPTPTLTLR_	0.724428	0.464835	0.583669	0.590977	21.9891
gi|472586051	RHTO_07327	477	hypothetical protein	0.826667	6.98532	S	_RSS(ph)LDSSLDQHLGTVPER_	#DIV/0!	2.11506	1.5395	1.82728	22.2724
gi|472587918	RHTO_03142	331	hypothetical protein	0.865718	8.23569	S	_HAS(ph)TDALSLHYIEAGAEGR_	#DIV/0!	0.673673	0.521404	0.597538	18.019
gi|472587918	RHTO_03142	181	hypothetical protein	0.887041	8.94765	S	_ASS(ph)PPS(ph)PHCHFAPLPK_	#DIV/0!	1.64268	1.86734	1.75501	9.05172
gi|472583711	RHTO_01801	54	hypothetical protein	0.876344	9.08406	S	_SQTPSHSRPASPS(ph)R_	#DIV/0!	0.721241	2.40535	1.5633	76.1753
gi|472582232	RHTO_03972	767	hypothetical protein	0.8855	9.61741	S	_SSDS(ph)PKPPPLVVK_	#DIV/0!	0.761383	0.825151	0.793267	5.68418
gi|472582451	RHTO_03671	306	hypothetical protein	0.937783	10.4782	S	_RAT(ph)SEESPS(ph)IVQNAFTR_	#DIV/0!	0.56123	0.802568	0.681899	25.0259
gi|472583025	RHTO_02635	31	hypothetical protein	0.941029	11.9727	S	_SRAPS(ph)PTFSEASTAVPS(ph)S(ph)DDDRSR_	#DIV/0!	1.69219	1.4748	1.58349	9.70774
gi|472583025	RHTO_02635	18	hypothetical protein	0.802253	12.4042	S	_SRAPS(ph)PTFSEASTAVPS(ph)S(ph)DDDRSR_	#DIV/0!	1.69219	1.4748	1.58349	9.70774
gi|472582451	RHTO_03671	773	hypothetical protein	0.938746	13.8789	S	_KASM(ox)FAPGGQTS(ph)ESDS(ph)DVAGSK_	#DIV/0!	0.974469	0.826651	0.90056	11.6064
gi|472583025	RHTO_02635	30	hypothetical protein	0.956954	14.3304	S	_SRAPS(ph)PTFSEASTAVPS(ph)S(ph)DDDRSR_	#DIV/0!	1.69219	1.4748	1.58349	9.70774
gi|472587695	RHTO_02919	93	hypothetical protein	0.97627	16.1525	S	_TPQIVYATS(ph)PGTK_	#DIV/0!	1.43486	1.2621	1.34848	9.05926
gi|472586547	RHTO_06070	217	hypothetical protein	0.957956	16.5011	S	_ITASPAS(ph)PSPR_	#DIV/0!	0.375601	0.726903	0.551252	45.0625
gi|472584613	RHTO_00953	318	hypothetical protein	0.971023	17.4335	S	_TADS(ph)PTNTAASSAHPR_	#DIV/0!	4.46788	3.91343	4.19066	9.35532
gi|472588003	RHTO_03228	456	hypothetical protein	0.982354	17.4573	S	_SPFTLQS(ph)PPPGR_	#DIV/0!	1.45271	1.30269	1.3777	7.69945
gi|472581740	RHTO_04464	674	hypothetical protein	0.985611	18.5801	S	_GYAAGIASAS(ph)PVSVAASR_	#DIV/0!	1.74271	1.4403	1.5915	13.436
gi|472587876	RHTO_03100	5	hypothetical protein	0.96793	18.6346	T	_(ac)MQLVT(ph)AFSTPT(ph)AREKTSALM(ox)R_	#DIV/0!	2.04566	2.27113	2.15839	7.38651
gi|472582550	RHTO_03464	709	hypothetical protein	0.987374	18.9683	S	_TALPANVPLPASVS(ph)PTR_	#DIV/0!	1.26778	1.5058	1.38679	12.1362
gi|472585457	RHTO_07882	108	hypothetical protein	0.988415	19.3003	S	_GSGAPDS(ph)PS(ph)PRPGSVAALR_	#DIV/0!	1.1843	0.638284	0.911293	42.3675
gi|472587379	RHTO_05058	39	hypothetical protein	0.989962	20.0627	S	_SASPPHPTAEPAS(ph)PTAAAPSEEAR_	#DIV/0!	0.419956	0.514986	0.467471	14.3744
gi|472585361	RHTO_07785	734	hypothetical protein	0.99499	22.9799	S	_SPLSPPTVQPIS(ph)PSVAAIR_	#DIV/0!	0.432694	0.581598	0.507146	20.7614
gi|472587125	RHTO_04803	52	hypothetical protein	0.995201	23.268	S	_SVSTS(ph)PPQR_	#DIV/0!	0.923702	1.02744	0.975573	7.51926
gi|472585457	RHTO_07882	106	hypothetical protein	0.997496	25.9931	S	_GSGAPDS(ph)PS(ph)PRPGSVAALR_	#DIV/0!	0.612182	0.638284	0.625233	2.95199
gi|472583102	RHTO_02371	500	hypothetical protein	0.998475	28.1576	S	_DTPPSAPVS(ph)S(ph)PIR_	#DIV/0!	0.487377	0.492199	0.489788	0.696111
gi|472582600	RHTO_03514	651	hypothetical protein	0.998153	28.1967	S	_ESVGHDSAAS(ph)PAASAEGPR_	#DIV/0!	1.12144	1.46171	1.29158	18.629
gi|472587183	RHTO_04862	1214	hypothetical protein	0.998824	29.3279	T	_TSAIPVT(ph)PPNQSLAR_	#DIV/0!	1.47918	1.60552	1.54235	5.7923
gi|472587918	RHTO_03142	323	hypothetical protein	0.998887	29.7021	S	_SHS(ph)PNLSR_	#DIV/0!	3.21512	2.58031	2.89772	15.4908
gi|472585872	RHTO_07148	697	hypothetical protein	0.997541	30.7654	S	_STKS(ph)RS(ph)PAPPPSAK_	#DIV/0!	0.953471	0.709673	0.831572	20.7308
gi|472583102	RHTO_02371	499	hypothetical protein	0.999182	30.8638	S	_DTPPSAPVS(ph)S(ph)PIR_	#DIV/0!	0.487377	0.492199	0.489788	0.696111
gi|472581004	RHTO_05695	17	hypothetical protein	1	33.8326	S	_(ac)MLAT(ph)T(ph)LVAAVALAHT(ph)IS(ph)AVS(ph)PAERK_	#DIV/0!	1.4902	1.10104	1.29562	21.239
gi|472581004	RHTO_05695	20	hypothetical protein	1	33.8326	S	_(ac)MLAT(ph)T(ph)LVAAVALAHT(ph)IS(ph)AVS(ph)PAERK_	#DIV/0!	1.4902	1.10104	1.29562	21.239
gi|472581004	RHTO_05695	4	hypothetical protein	1	33.8326	T	_(ac)MLAT(ph)T(ph)LVAAVALAHT(ph)IS(ph)AVS(ph)PAERK_	#DIV/0!	1.4902	1.10104	1.29562	21.239
gi|472581004	RHTO_05695	5	hypothetical protein	1	33.8326	T	_(ac)MLAT(ph)T(ph)LVAAVALAHT(ph)IS(ph)AVS(ph)PAERK_	#DIV/0!	1.4902	1.10104	1.29562	21.239
gi|472581797	RHTO_04286	145	hypothetical protein	0.999591	33.8864	S	_SAVPTEADDGHS(ph)PVQR_	#DIV/0!	2.08338	1.97879	2.03108	3.6412
gi|472581365	RHTO_05267	228	hypothetical protein	0.999833	34.9576	S	_VGGS(ph)T(ph)SPS(ph)PPRDHIDEGAAHLAR_	#DIV/0!	3.09828	1.50281	2.30054	49.0391
gi|472582730	RHTO_03320	558	hypothetical protein	0.999735	35.9195	S	_KRDETPSGTTTAS(ph)V_	#DIV/0!	0.598229	0.63861	0.61842	4.61722
gi|472584226	RHTO_01479	15	hypothetical protein	0.999875	39.0478	S	_AASDS(ph)PVLAQR_	#DIV/0!	0.484896	0.859771	0.672333	39.4265
gi|472583711	RHTO_01801	48	hypothetical protein	0.999786	40.6909	S	_SQTPSHS(ph)RPASPS(ph)R_	#DIV/0!	0.681663	0.783147	0.732405	9.79781
gi|472586051	RHTO_07327	294	hypothetical protein	0.999934	43.0598	S	_RIYPSSGAATSSVSAVAS(ph)DAS(ph)EDEDADTR_	#DIV/0!	1.27149	1.06667	1.16908	12.3885
gi|472586051	RHTO_07327	297	hypothetical protein	0.999954	46.1455	S	_RIYPSSGAATSSVSAVAS(ph)DAS(ph)EDEDADTR_	#DIV/0!	1.27149	1.06667	1.16908	12.3885
gi|472583977	RHTO_01653	585	hypothetical protein	0.999998	57.8141	S	_SPQQPQQPQQPQRS(ph)PDVR_	#DIV/0!	0.617856	1.31249	0.965174	50.8904
gi|472581365	RHTO_05267	211	hypothetical protein	0.999999	60.7262	S	_IRDDAAGVHTPNRDS(ph)VDEDALR_	#DIV/0!	1.77447	1.19705	1.48576	27.4808
gi|472580652	RHTO_05967	156	hypothetical protein	1	70.4703	S	_QAAAGVGAKS(ph)PR_	#DIV/0!	0.777061	0.903506	0.840283	10.6404
gi|472587259	RHTO_04938	42	hypothetical protein	1	72.7049	S	_RNS(ph)APQPPR_	#DIV/0!	0.614477	0.70373	0.659103	9.57531
gi|472582100	RHTO_04094	23	hypothetical protein	1	165.419	S	_GAS(ph)PAVVGGQGGGLPDLDPLR_	#DIV/0!	1.04487	0.712962	0.878914	26.7025
gi|472584562	RHTO_00902	848	hypothetical protein	0.838497	7.55312	S	_SSLVAS(ph)PSSR_	14.4279	3.40321	#DIV/0!	8.91557	87.4386
gi|472583711	RHTO_01801	52	hypothetical protein	0.989978	20.2581	S	_SQTPSHSRPAS(ph)PSR_	12.8856	1.91399	0.848033	5.21587	127.755
gi|472588186	RHTO_00086	933	hypothetical protein	1	133.05	S	_QPS(ph)PPNVAR_	11.9769	13.3207	8.17194	11.1565	23.9378
gi|472581676	RHTO_04400	149	hypothetical protein	0.958703	13.4872	S	_HTVDS(ph)S(ph)S(ph)HNSSFAPSTHK_	10.6293	#DIV/0!	3.18857	6.90891	76.1532
gi|472581676	RHTO_04400	148	hypothetical protein	0.961217	13.4872	S	_HTVDS(ph)S(ph)S(ph)HNSSFAPSTHK_	10.6293	#DIV/0!	3.18857	6.90891	76.1532
gi|472581676	RHTO_04400	150	hypothetical protein	0.952219	18.8683	S	_HTVDS(ph)S(ph)S(ph)HNSSFAPSTHK_	10.6293	#DIV/0!	3.18857	6.90891	76.1532
gi|472585362	RHTO_07786	227	hypothetical protein	0.997497	25.838	S	_RAS(ph)S(ph)SEGGDGLALTR_	9.85416	16.3369	0.85918	9.01676	86.2037
gi|472582102	RHTO_04096	592	hypothetical protein	1	88.3155	S	_SQPVS(ph)PEPVYPR_	8.94374	1.51747	0.576435	3.67922	124.576
gi|472586325	RHTO_06912	1257	hypothetical protein	0.999985	48.3368	S	_QS(ph)PTISLR_	7.50356	3.2496	0.658588	3.80392	90.8535
gi|472586755	RHTO_06278	441	hypothetical protein	0.999779	36.5633	S	_SVGPSDS(ph)PVKR_	6.81199	1.39856	3.90518	4.03858	67.0825
gi|472585362	RHTO_07786	72	hypothetical protein	0.981864	17.335	S	_SHS(ph)PAAGPLEDEPR_	6.71321	#DIV/0!	1.14891	3.93106	100.089
gi|472582370	RHTO_03860	235	hypothetical protein	0.999996	54.1499	S	_S(ph)PPATDSFLQR_	5.9011	8.60807	3.58115	6.03011	41.7231
gi|472580942	RHTO_05633	232	hypothetical protein	1	105.613	S	_ARPPAAEEPAS(ph)DAS(ph)DDPLLLR_	5.86098	7.77424	#DIV/0!	6.81761	19.8439
gi|472580942	RHTO_05633	235	hypothetical protein	1	105.613	S	_ARPPAAEEPAS(ph)DAS(ph)DDPLLLR_	5.86098	7.77424	#DIV/0!	6.81761	19.8439
gi|472584291	RHTO_01099	167	hypothetical protein	1	71.3343	S	_AAS(ph)VVVSAR_	5.19238	6.39345	2.11977	4.56853	48.2449
gi|472588295	RHTO_00195	109	hypothetical protein	0.980442	20.4748	S	_SFSRDDT(ph)SDVSSVHS(ph)LDDDELPAPSFTR_	5.1913	0.888968	3.56812	3.21613	67.555
gi|472581619	RHTO_04539	193	hypothetical protein	0.998865	29.4463	S	_SVS(ph)SPVETQR_	5.18269	3.77387	2.45797	3.80484	35.8129
gi|472585362	RHTO_07786	489	hypothetical protein	1	90.827	S	_RGS(ph)S(ph)FLR_	5.1083	9.57396	5.18027	6.62084	38.6314
gi|472585362	RHTO_07786	490	hypothetical protein	1	90.827	S	_RGS(ph)S(ph)FLR_	5.1083	9.57396	5.18027	6.62084	38.6314
gi|472581740	RHTO_04464	527	hypothetical protein	0.906785	11.2343	S	_SVSSQDPFLSSS(ph)PPR_	4.86618	#DIV/0!	2.39958	3.63288	48.0102
gi|472585563	RHTO_07456	285	hypothetical protein	0.999937	41.9852	S	_TPS(ph)PPTDLPR_	4.81672	2.92355	4.35464	4.03164	24.4827
gi|472582548	RHTO_03462	14	hypothetical protein	0.999964	44.379	S	_TSS(ph)S(ph)PPLPTSR_	4.79478	2.0107	1.09535	2.63361	73.161
gi|472584562	RHTO_00902	417	hypothetical protein	0.999999	60.7989	S	_RHS(ph)VS(ph)PVVTPK_	4.71365	3.49125	1.57851	3.26114	48.4551
gi|472584562	RHTO_00902	419	hypothetical protein	0.999994	51.9661	S	_RHS(ph)VS(ph)PVVTPK_	4.71365	3.49125	#DIV/0!	4.10245	21.0694
gi|472587645	RHTO_02869	60	hypothetical protein	0.994142	22.3002	S	_TSS(ph)PEAVDM(ox)LK_	4.67268	2.06441	1.87312	2.87007	54.4947
gi|472585362	RHTO_07786	228	hypothetical protein	0.962448	14.0762	S	_RAS(ph)S(ph)SEGGDGLALTR_	4.60151	#DIV/0!	0.85918	2.73034	96.9191
gi|472586649	RHTO_06172	8	hypothetical protein	0.985614	20.1181	S	_SRS(ph)PSEVPSGYK_	4.24304	4.07598	#DIV/0!	4.15951	2.84007
gi|472587807	RHTO_03031	680	hypothetical protein	1	80.8662	S	_GSGS(ph)PIPGVK_	4.16216	3.16606	2.14703	3.15842	31.9016
gi|472587918	RHTO_03142	432	hypothetical protein	1	116.026	S	_AVS(ph)PALAAAR_	4.14113	#DIV/0!	3.26926	3.70519	16.639
gi|472585872	RHTO_07148	647	hypothetical protein	0.999517	33.1579	S	_VQTKS(ph)PS(ph)PAPTPR_	4.06752	1.21054	1.5822	2.28675	67.928
gi|472582370	RHTO_03860	345	hypothetical protein	1	80.7041	S	_RFS(ph)IGGLGSR_	4.01816	4.68735	#DIV/0!	4.35276	10.871
gi|472582616	RHTO_03530	260	hypothetical protein	0.999994	57.0284	S	_VVS(ph)PPPIDSSKPTR_	3.82117	2.16296	#DIV/0!	2.99206	39.1881
gi|472587763	RHTO_02987	468	hypothetical protein	0.957781	14.1675	T	_RTDSQLFNNDAT(ph)DS(ph)DAPS(ph)PHAQPPR_	3.39963	2.56062	#DIV/0!	2.98012	19.9074
gi|472587763	RHTO_02987	470	hypothetical protein	0.998418	29.4096	S	_RTDSQLFNNDAT(ph)DS(ph)DAPS(ph)PHAQPPR_	3.39963	2.56062	#DIV/0!	2.98012	19.9074
gi|472582102	RHTO_04096	523	hypothetical protein	1	73.3564	S	_VKRS(ph)PS(ph)PAASDVSAASTSR_	3.38995	1.4792	1.44538	2.10484	52.8809
gi|472586154	RHTO_06741	396	hypothetical protein	1	58.9376	S	_DLM(ox)GGLGS(ph)DEEDEDKVEGPDR_	3.23824	#DIV/0!	0.996711	2.11747	74.8533
gi|472582102	RHTO_04096	521	hypothetical protein	1	79.1043	S	_VKRS(ph)PS(ph)PAASDVSAASTSR_	3.21161	1.55142	1.44538	2.06947	47.8646
gi|472587934	RHTO_03158	497	hypothetical protein	0.942368	12.1361	S	_SS(ph)PPLSNPNR_	3.18026	2.90032	2.45393	2.84483	12.877
gi|472582548	RHTO_03462	15	hypothetical protein	1	65.1671	S	_TSS(ph)S(ph)PPLPTSR_	3.13067	1.46368	2.26408	2.28615	36.4682
gi|472586325	RHTO_06912	222	hypothetical protein	0.954263	16.1821	S	_DSTDSPAPDS(ph)PTS(ph)SIPKPLRPPK_	3.0049	#DIV/0!	1.25335	2.12913	58.1708
gi|472582825	RHTO_03415	98	hypothetical protein	0.999992	52.8102	S	_GRYS(ph)SDLAPAAGAS(ph)DADHDS(ph)LLGAGALGEK_	2.92989	0.557818	0.804311	1.43067	91.1596
gi|472585720	RHTO_07613	933	hypothetical protein	1	74.1229	S	_AVDGLVEPDRAS(ph)S(ph)PAAGADNHR_	2.92475	0.799872	1.98815	1.90426	55.9231
gi|472581614	RHTO_04534	891	hypothetical protein	0.997735	28.3383	S	_GLVSDNES(ph)DS(ph)DDSEAIVTNRR_	2.80089	0.804829	2.01544	1.87372	53.6659
gi|472581614	RHTO_04534	889	hypothetical protein	0.998209	29.0445	S	_GLVSDNES(ph)DS(ph)DDSEAIVTNRR_	2.80089	0.804829	1.26624	1.62398	64.3485
gi|472582232	RHTO_03972	508	hypothetical protein	0.866613	8.1068	T	_TPAPPT(ph)PT(ph)SEEEEAHLPFEAEKK_	2.78195	#DIV/0!	0.563952	1.67295	93.7482
gi|472587918	RHTO_03142	301	hypothetical protein	0.999915	40.7219	S	_SRS(ph)PS(ph)PPGGVR_	2.77293	1.80486	1.56708	2.04829	31.183
gi|472587918	RHTO_03142	303	hypothetical protein	0.999999	60.7145	S	_SRS(ph)PS(ph)PPGGVR_	2.77293	1.80486	1.56708	2.04829	31.183
gi|472582370	RHTO_03860	419	hypothetical protein	1	60.2551	S	_KLS(ph)PM(ox)GER_	2.77008	3.77273	2.3138	2.9522	25.2802
gi|472582232	RHTO_03972	506	hypothetical protein	0.995788	23.1808	T	_TPAPPT(ph)PT(ph)SEEEEAHLPFEAEKK_	2.75149	0.284706	1.78725	1.60781	77.3188
gi|472582232	RHTO_03972	509	hypothetical protein	0.949024	12.6386	S	_TPAPPT(ph)PTS(ph)EEEEAHLPFEAEKK_	2.72131	0.284706	1.84611	1.61737	76.3151
gi|472582548	RHTO_03462	13	hypothetical protein	0.995099	23.186	S	_GRTS(ph)S(ph)S(ph)PPLPTSR_	2.62867	3.04627	2.86549	2.84681	7.35649
gi|472582548	RHTO_03462	228	hypothetical protein	0.92742	11.5223	S	_LVLLFSTS(ph)PR_	2.58846	1.24858	#DIV/0!	1.91852	49.3838
gi|472580918	RHTO_05788	604	hypothetical protein	0.999988	49.2224	S	_TDS(ph)WDGSLR_	2.5411	1.03829	#DIV/0!	1.7897	59.3758
gi|472585457	RHTO_07882	151	hypothetical protein	0.999862	38.596	S	_RGS(ph)GGTDASLDSIAR_	2.53075	0.828706	1.26765	1.54237	57.2918
gi|472582004	RHTO_04247	241	hypothetical protein	0.814098	7.54634	T	_KPSRPS(ph)T(ph)PSSAPLSAAPAR_	2.52615	2.16558	0.375136	1.68895	68.2075
gi|472585720	RHTO_07613	934	hypothetical protein	1	74.1229	S	_AVDGLVEPDRAS(ph)S(ph)PAAGADNHR_	2.47776	1.83194	1.57065	1.96012	23.8222
gi|472587763	RHTO_02987	474	hypothetical protein	0.999993	55.2011	S	_RTDSQLFNNDAT(ph)DS(ph)DAPS(ph)PHAQPPR_	2.42154	2.56062	1.55463	2.17893	25.0175
gi|472584100	RHTO_01353	442	hypothetical protein	0.844335	7.6037	S	_ASS(ph)PSTPTS(ph)SPPAELANDEEREKDK_	2.38254	#DIV/0!	1.70855	2.04555	23.2984
gi|472583102	RHTO_02371	573	hypothetical protein	0.990662	22.9439	S	_KVM(ox)SQASQS(ph)QPNTDVEEGSSVR_	2.31793	1.37406	1.19228	1.62809	37.1166
gi|472582905	RHTO_02515	400	hypothetical protein	0.997237	25.8595	S	_EEDDPNTIGVEEVQQGES(ph)GRVDSPEPQQGAIGR_	2.23174	1.81911	2.23424	2.09503	11.406
gi|472585457	RHTO_07882	154	hypothetical protein	0.804557	6.14761	T	_RGSGGT(ph)DASLDSIAR_	2.22499	1.42189	1.35522	1.66737	29.0319
gi|472587382	RHTO_05061	301	hypothetical protein	0.995962	23.9209	S	_DSSGEGEKDGFASYAPLPTDGS(ph)PQR_	2.21651	1.09058	1.26784	1.52498	39.6992
gi|472583197	RHTO_02467	126	hypothetical protein	0.999722	35.5574	S	_SGS(ph)QVDLNHIFER_	2.20493	2.2314	1.91	2.11544	8.4336
gi|472587918	RHTO_03142	184	hypothetical protein	0.999476	32.2875	S	_ASS(ph)PPS(ph)PHCHFAPLPK_	2.18986	5.2843	1.52917	3.00111	66.7988
gi|472585872	RHTO_07148	515	hypothetical protein	0.852728	7.65286	S	_TS(ph)AEPAPSTTQSGRPAK_	2.17325	2.17476	#DIV/0!	2.17401	0.0491922
gi|472585084	RHTO_08003	20	hypothetical protein	0.999988	49.9064	S	_AERPLS(ph)PSTS(ph)PTFSR_	2.17212	#DIV/0!	1.89908	2.0356	9.48445
gi|472588693	RHTO_00593	206	hypothetical protein	1	100.77	S	_VIEVLDS(ph)T(ph)EEEEVKQQELER_	2.1568	0.557942	1.29079	1.33518	59.9435
gi|472588693	RHTO_00593	207	hypothetical protein	1	100.77	T	_VIEVLDS(ph)T(ph)EEEEVKQQELER_	2.1568	0.557942	1.29079	1.33518	59.9435
gi|472585361	RHTO_07785	212	hypothetical protein	1	99.7468	S	_ALLS(ph)PLLS(ph)PQRR_	2.13156	0.308566	0.860659	1.10026	84.9632
gi|472581847	RHTO_04337	87	hypothetical protein	1	95.7666	T	_RLS(ph)GLT(ph)EAGDDEADEAVQR_	2.09793	0.941974	#DIV/0!	1.51995	53.777
gi|472583102	RHTO_02371	794	hypothetical protein	0.984509	21.3661	S	_LSHAANTRLPS(ph)S(ph)S(ph)PEPALPTIGGK_	2.09652	2.76488	1.74456	2.20199	23.5364
gi|472583102	RHTO_02371	792	hypothetical protein	0.995449	24.8387	S	_LSHAANTRLPS(ph)S(ph)S(ph)PEPALPTIGGK_	2.09652	2.76488	1.60367	2.15502	27.0442
gi|472587382	RHTO_05061	281	hypothetical protein	0.927527	8.08167	S	_S(ph)RDS(ph)SGEGEKDGFASYAPLPTDGSPQR_	2.08242	2.09824	1.24006	1.80691	27.1716
gi|472582404	RHTO_03623	235	hypothetical protein	0.999965	44.508	S	_ETGDIKPS(ph)PR_	2.05944	1.10541	0.965158	1.37667	43.2521
gi|472587917	RHTO_03141	208	hypothetical protein	0.999935	41.8629	S	_SNS(ph)LSIGVASR_	2.04553	1.85388	1.16077	1.68673	27.5958
gi|472588070	RHTO_03295	401	hypothetical protein	0.987866	19.3451	S	_AGGSSGVS(ph)PIPR_	2.04007	1.31898	1.10531	1.48812	32.9135
gi|472582250	RHTO_03990	412	hypothetical protein	0.99999	49.8904	S	_QITADS(ph)DEDVASGPSKK_	2.02306	1.54667	1.26786	1.61253	23.6823
gi|472588295	RHTO_00195	84	hypothetical protein	0.994125	24.1334	S	_DLEADPLAS(ph)PSSR_	1.9972	1.33674	1.53179	1.62191	20.9216
gi|472585720	RHTO_07613	1057	hypothetical protein	0.999954	43.3239	S	_VNS(ph)PARS(ph)DS(ph)AGPDLPQDGSIR_	1.99617	2.91138	0.94509	1.95088	50.435
gi|472585720	RHTO_07613	1055	hypothetical protein	0.999999	61.3467	S	_VNS(ph)PARS(ph)DS(ph)AGPDLPQDGSIR_	1.99617	1.98681	0.94509	1.64269	36.7785
gi|472585720	RHTO_07613	1051	hypothetical protein	1	79.7919	S	_VNS(ph)PARS(ph)DS(ph)AGPDLPQDGSIR_	1.99617	2.40506	#DIV/0!	2.20061	13.1386
gi|472582825	RHTO_03415	92	hypothetical protein	0.999551	36.2531	S	_GRYSS(ph)DLAPAAGAS(ph)DADHDSLLGAGALGEK_	1.96371	0.436758	0.948317	1.11626	69.6259
gi|472588295	RHTO_00195	228	hypothetical protein	0.950433	15.8376	S	_VLGIS(ph)SSPPR_	1.95332	1.59413	1.63548	1.72764	11.3755
gi|472584226	RHTO_01479	13	hypothetical protein	0.999961	44.0427	S	_AAS(ph)DSPVLAQR_	1.94477	#DIV/0!	1.09098	1.51787	39.7742
gi|472583197	RHTO_02467	247	hypothetical protein	0.996227	24.2163	S	_SFSPDS(ph)GSGGR_	1.89039	1.60359	2.4253	1.9731	21.1368
gi|472582370	RHTO_03860	13	hypothetical protein	0.97785	19.4592	S	_RGS(ph)TTQPQPVPIASSPR_	1.8639	1.24465	1.51607	1.54154	20.1364
gi|472583102	RHTO_02371	318	hypothetical protein	0.999503	33.0427	T	_KAAT(ph)PAASAASK_	1.86092	1.41068	#DIV/0!	1.6358	19.4625
gi|472582529	RHTO_03749	305	hypothetical protein	0.992934	21.4766	S	_RAPS(ph)PAPSTSSAAPLHS(ph)PSAPR_	1.85836	1.70178	1.77617	1.77877	4.40307
gi|472587564	RHTO_02787	176	hypothetical protein	0.990832	24.0872	S	_AVGDTAVLVEEPAAGRS(ph)PPHS(ph)PVGSSLFQR_	1.85615	1.48491	1.04301	1.46136	27.8562
gi|472587564	RHTO_02787	172	hypothetical protein	0.999917	44.2205	S	_AVGDTAVLVEEPAAGRS(ph)PPHS(ph)PVGSSLFQR_	1.85615	1.48491	1.12619	1.48908	24.5115
gi|472585856	RHTO_07132	223	hypothetical protein	0.999999	60.7176	S	_YGGPPS(ph)PVYR_	1.84023	1.22597	1.13171	1.3993	27.496
gi|472587382	RHTO_05061	278	hypothetical protein	0.867193	5.16527	S	_S(ph)RDS(ph)SGEGEKDGFASYAPLPTDGS(ph)PQR_	1.78298	1.66453	1.57903	1.67551	6.11248
gi|472584199	RHTO_01452	92	hypothetical protein	1	85.7661	S	_GFDQDDEEVDQLDS(ph)DLEEDDDASKPPPSKR_	1.77478	1.07103	1.31251	1.38611	25.7989
gi|472582004	RHTO_04247	145	hypothetical protein	0.949174	13.5792	S	_GGPSVSTSGANS(ph)SSEAAPAKTDAEK_	1.74859	0.652273	0.651508	1.01746	62.2315
gi|472585084	RHTO_08003	24	hypothetical protein	0.835266	7.64534	S	_AERPLSPSTS(ph)PTFSR_	1.72825	2.9536	1.90396	2.19527	30.1822
gi|472586751	RHTO_06274	71	hypothetical protein	1	89.2306	S	_RRGS(ph)S(ph)PLLDER_	1.68177	#DIV/0!	1.30467	1.49322	17.8578
gi|472586751	RHTO_06274	72	hypothetical protein	1	89.2306	S	_RRGS(ph)S(ph)PLLDER_	1.68177	#DIV/0!	1.30467	1.49322	17.8578
gi|472588015	RHTO_03240	133	hypothetical protein	1	73.6101	S	_RSS(ph)AAS(ph)DLLSR_	1.67316	0.755915	1.24576	1.22495	37.4692
gi|472583102	RHTO_02371	793	hypothetical protein	0.997444	27.1055	S	_LSHAANTRLPS(ph)S(ph)S(ph)PEPALPTIGGK_	1.63932	2.76488	1.19369	1.86596	43.3955
gi|472583102	RHTO_02371	744	hypothetical protein	1	88.075	S	_AHAS(ph)PAS(ph)AKK_	1.63409	0.877732	#DIV/0!	1.25591	42.5848
gi|472586381	RHTO_06968	255	hypothetical protein	1	106.13	S	_DLAALGINRPAS(ph)RS(ph)PNR_	1.62599	1.522	1.54897	1.56565	3.44678
gi|472586381	RHTO_06968	257	hypothetical protein	1	106.13	S	_DLAALGINRPAS(ph)RS(ph)PNR_	1.62599	1.522	1.54897	1.56565	3.44678
gi|472584672	RHTO_01012	269	hypothetical protein	1	78.1758	S	_LSQIEEDVAVS(ph)PR_	1.57324	#DIV/0!	1.33221	1.45273	11.7319
gi|472586333	RHTO_06920	159	hypothetical protein	0.999954	43.3546	S	_LM(ox)RNVYS(ph)DNPLFEAR_	1.52047	#DIV/0!	1.03	1.27524	27.196
gi|472584999	RHTO_00853	110	hypothetical protein	1	75.1676	T	_RPGT(ph)PPFS(ph)PSQSSFR_	1.51117	#DIV/0!	1.03073	1.27095	26.73
gi|472582825	RHTO_03415	8	hypothetical protein	0.994416	21.4728	T	_TGS(ph)LT(ph)PPIPSPPLANPQHAR_	1.48613	2.2169	2.09262	1.93188	20.2396
gi|472583977	RHTO_01653	56	hypothetical protein	1	85.3062	S	_ELSEWHGDFNAPPS(ph)PPQQR_	1.47606	0.833681	0.793966	1.03457	37.0064
gi|472583102	RHTO_02371	245	hypothetical protein	0.952082	12.9817	S	_AAPAPEPAQPEPAAS(ph)QAASEVDPAEKER_	1.41355	#DIV/0!	0.620617	1.01708	55.127
gi|472583102	RHTO_02371	249	hypothetical protein	0.988859	19.4823	S	_AAPAPEPAQPEPAASQAAS(ph)EVDPAEKER_	1.40698	0.778695	#DIV/0!	1.09284	40.6526
gi|472582529	RHTO_03749	292	hypothetical protein	0.997824	32.6254	S	_RAPS(ph)PAPSTSSAAPLHS(ph)PSAPR_	1.40223	1.70178	1.77617	1.62673	12.1683
gi|472585872	RHTO_07148	649	hypothetical protein	0.999993	52.9787	S	_VQTKS(ph)PS(ph)PAPTPR_	1.38445	1.22288	0.971912	1.19308	17.4235
gi|472588196	RHTO_00096	109	hypothetical protein	0.999997	56.0165	S	_GTLIDAS(ph)PIAEQVEQVPAVEAGRPR_	1.38017	0.8992	1.20158	1.16031	20.9533
gi|472585856	RHTO_07132	350	hypothetical protein	0.999519	33.1798	S	_GRS(ph)PS(ph)PFSGPPSR_	1.37397	#DIV/0!	0.583192	0.978579	57.1401
gi|472585856	RHTO_07132	348	hypothetical protein	0.999998	57.6838	S	_GRS(ph)PS(ph)PFSGPPSR_	1.37397	#DIV/0!	0.79233	1.08315	37.9707
gi|472583102	RHTO_02371	741	hypothetical protein	1	88.075	S	_AHAS(ph)PAS(ph)AKK_	1.36452	0.877732	0.660502	0.967584	37.2583
gi|472586666	RHTO_06189	514	hypothetical protein	1	108.419	S	_RFS(ph)GELPYESR_	1.35573	1.38085	1.36088	1.36582	0.971639
gi|472580616	RHTO_06448	162	hypothetical protein	0.983337	17.7094	S	_TAS(ph)PPPVNPELAALEAQKR_	1.32322	1.19804	0.775194	1.09882	26.1346
gi|472586325	RHTO_06912	1350	hypothetical protein	0.999728	35.6563	S	_ISS(ph)GGLGAALK_	1.28446	0.735835	1.12983	1.05004	26.9399
gi|472587698	RHTO_02922	272	hypothetical protein	1	75.6689	S	_RGS(ph)AAAGAGAR_	1.27993	1.66589	1.33099	1.4256	14.7062
gi|472583102	RHTO_02371	682	hypothetical protein	1	73.164	S	_QVEAEEQVES(ph)DEELDELDSTPAQSVTHQQQQR_	1.26275	0.983768	0.928247	1.05826	16.9395
gi|472582004	RHTO_04247	237	hypothetical protein	0.998308	30.3592	S	_KPS(ph)RPSTPS(ph)SAPLSAAPAR_	1.25953	0.587959	0.498405	0.781963	53.1992
gi|472588590	RHTO_00490	621	hypothetical protein	1	76.7282	S	_HQPS(ph)GELEVLK_	1.25504	#DIV/0!	1.26291	1.25897	0.44244
gi|472580292	RHTO_06688	681	hypothetical protein	0.937223	11.5434	S	_AGS(ph)LTQPAQPYHGSS(ph)PLATPSASPTTAHR_	1.24542	1.02722	1.15296	1.14187	9.59156
gi|472580292	RHTO_06688	693	hypothetical protein	0.756111	6.15109	S	_AGSLTQPAQPYHGSS(ph)PLATPSAS(ph)PTTAHR_	1.24542	#DIV/0!	1.72212	1.48377	22.7174
gi|472585872	RHTO_07148	719	hypothetical protein	0.966709	13.7496	S	_SGAPT(ph)PAAKSPS(ph)PPPPQPTVEAAPAVPK_	1.18582	#DIV/0!	0.859771	1.02279	22.5411
gi|472580527	RHTO_06462	535	hypothetical protein	0.876625	8.56418	S	_GAVETTNS(ph)PVAYR_	1.17514	0.489788	#DIV/0!	0.832466	58.215
gi|472582004	RHTO_04247	140	hypothetical protein	0.773263	8.6528	T	_GGPSVST(ph)SGANSSSEAAPAK_	1.17213	#DIV/0!	1.00359	1.08786	10.9547
gi|472586666	RHTO_06189	636	hypothetical protein	1	78.3239	S	_RS(ph)LS(ph)PPGR_	1.16351	#DIV/0!	1.56838	1.36594	20.959
gi|472586666	RHTO_06189	638	hypothetical protein	1	78.3239	S	_RS(ph)LS(ph)PPGR_	1.16351	#DIV/0!	1.56838	1.36594	20.959
gi|472583102	RHTO_02371	142	hypothetical protein	1	78.7083	S	_TVDVDAELS(ph)DDDEPPKKK_	1.13976	0.921659	0.625234	0.89555	28.8374
gi|472580616	RHTO_06448	386	hypothetical protein	0.804308	6.1385	S	_RSS(ph)RPPGGEADQAAAAAAAAEAAAR_	1.0851	1.02046	0.955292	1.02029	6.36159
gi|472587284	RHTO_04963	958	hypothetical protein	1	92.5415	S	_SPLVAGS(ph)PAR_	1.07917	0.666978	1.07038	0.938841	25.0821
gi|472582232	RHTO_03972	556	hypothetical protein	0.999903	37.8443	S	_KAS(ph)NT(ph)SIVSAASTR_	1.06838	0.145248	0.27171	0.495111	101.083
gi|472585457	RHTO_07882	157	hypothetical protein	0.999811	37.2415	S	_RGS(ph)GGTDAS(ph)LDSIAR_	1.03848	0.828706	2.05698	1.30805	50.2284
gi|472585018	RHTO_07937	97	hypothetical protein	0.999998	58.7554	S	_RQS(ph)SGPAGAAVS(ph)PEPTPSKPK_	1.02204	0.864006	2.23399	1.37334	54.5761
gi|472583102	RHTO_02371	333	hypothetical protein	1	63.8977	S	_KRAES(ph)PAPSEAGPSR_	1.01473	0.746659	0.641313	0.800902	24.039
gi|472588590	RHTO_00490	308	hypothetical protein	1	101.712	S	_FEPQRPAS(ph)R_	1.01396	#DIV/0!	0.795292	0.904627	17.0925
gi|472585816	RHTO_07092	229	hypothetical protein	0.972959	18.571	S	_QVAVLDAGRPS(ph)PSAATNPK_	0.992556	0.579811	#DIV/0!	0.786183	37.123
gi|472583711	RHTO_01801	77	hypothetical protein	0.999844	38.0581	S	_EASLS(ph)QVR_	0.989218	#DIV/0!	1.09229	1.04075	7.00276
gi|472580407	RHTO_06583	190	hypothetical protein	0.999977	51.2282	S	_HGAS(ph)S(ph)EDEDGERDEDDDEESKYGTVASYR_	0.987362	#DIV/0!	0.870777	0.929069	8.87319
gi|472580407	RHTO_06583	191	hypothetical protein	0.999985	52.2403	S	_HGAS(ph)S(ph)EDEDGERDEDDDEESKYGTVASYR_	0.987362	#DIV/0!	0.870777	0.929069	8.87319
gi|472585152	RHTO_08071	237	hypothetical protein	0.973926	16.3427	S	_RGPPS(ph)PTYTPSSPK_	0.987069	0.876271	0.684463	0.849268	18.0273
gi|472582232	RHTO_03972	26	hypothetical protein	0.977771	16.5132	S	_NKS(ph)SSALS(ph)TQTIR_	0.970685	0.308404	0.625	0.634696	52.1898
gi|472582232	RHTO_03972	31	hypothetical protein	0.977461	16.644	S	_SSSALS(ph)TQTIR_	0.970685	0.326765	0.625	0.640817	50.2876
gi|472585152	RHTO_08071	244	hypothetical protein	0.962166	14.2716	S	_RGPPSPT(ph)YTPSS(ph)PK_	0.958773	0.757289	0.516823	0.744295	29.7277
gi|472583102	RHTO_02371	207	hypothetical protein	0.997823	26.7084	S	_APPATPARDPVPAHIS(ph)S(ph)PAIEIESK_	0.914578	0.475443	0.464965	0.618329	41.5011
gi|472583102	RHTO_02371	208	hypothetical protein	0.999314	32.6284	S	_APPATPARDPVPAHIS(ph)S(ph)PAIEIESK_	0.914578	0.475443	0.464965	0.618329	41.5011
gi|472585152	RHTO_08071	239	hypothetical protein	0.774049	5.41596	T	_RGPPSPT(ph)YTPSSPK_	0.903996	1.51494	1.00334	1.14076	28.7386
gi|472584973	RHTO_00827	299	hypothetical protein	0.772746	7.03285	S	_RADDDDDYGDDDDGS(ph)DYSEEVGSVGPTAPR_	0.867077	0.703631	0.563253	0.71132	21.3768
gi|472588183	RHTO_00083	154	hypothetical protein	0.995134	24.5171	S	_RPYPERS(ph)PSPS(ph)M(ox)LVR_	0.840689	#DIV/0!	0.533077	0.686883	31.6669
gi|472587045	RHTO_04723	71	hypothetical protein	0.999985	48.2489	S	_TTTSAFGS(ph)AGK_	0.839067	0.240177	0.526122	0.535122	55.9772
gi|472586325	RHTO_06912	286	hypothetical protein	0.9995	33.0046	S	_AGS(ph)SLGGVGR_	0.829944	0.725637	1.31253	0.956036	32.7502
gi|472585720	RHTO_07613	1742	hypothetical protein	0.999952	49.1229	S	_TAEEASSTSTNLPS(ph)PAKR_	0.829944	0.493657	0.667067	0.663556	25.344
gi|472582897	RHTO_02507	392	hypothetical protein	0.937396	11.7532	S	_RSS(ph)ACEALAGK_	0.78796	0.588755	0.563857	0.646857	18.9889
gi|472583711	RHTO_01801	75	hypothetical protein	0.999995	53.0386	S	_EAS(ph)LSQVR_	0.786535	0.551146	#DIV/0!	0.66884	24.8855
gi|472585018	RHTO_07937	89	hypothetical protein	0.999997	54.9702	S	_RQS(ph)S(ph)GPAGAAVSPEPTPSKPK_	0.755287	0.838223	0.599484	0.730998	16.5812
gi|472583102	RHTO_02371	311	hypothetical protein	1	104.954	S	_AVAAPPPAS(ph)PVKK_	0.750582	0.396731	0.596623	0.581312	30.5209
gi|472586381	RHTO_06968	329	hypothetical protein	0.99991	41.4109	S	_APNTHWDDGS(ph)PGQTGSPAR_	0.738989	2.07723	#DIV/0!	1.40811	67.2021
gi|472587045	RHTO_04723	331	hypothetical protein	0.999935	47.0607	S	_TRPSPSVLES(ph)PSAANS(ph)PTTSR_	0.733514	0.465311	0.395241	0.531356	33.6019
gi|472585563	RHTO_07456	459	hypothetical protein	0.999662	34.703	S	_RM(ox)S(ph)EQSEALDAPAR_	0.726375	0.286049	0.276709	0.429711	59.7984
gi|472586020	RHTO_07296	54	hypothetical protein	0.999119	32.3382	S	_QGSRLPSEGSAS(ph)PTVSAGK_	0.717412	0.250947	0.456663	0.475007	49.2145
gi|472585018	RHTO_07937	88	hypothetical protein	0.999996	54.3873	S	_RQS(ph)S(ph)GPAGAAVSPEPTPSKPK_	0.713623	0.942951	0.599484	0.75202	23.2605
gi|472583794	RHTO_01884	353	hypothetical protein	0.986307	21.9858	S	_GYGS(ph)ASTSASAPQDKK_	0.685448	0.598086	0.976562	0.753366	26.3044
gi|472587010	RHTO_04688	407	hypothetical protein	0.926114	10.9835	S	_SQKS(ph)PPQPSPAPLPPVNR_	0.669254	0.354635	0.505204	0.509698	30.8728
gi|472582951	RHTO_02561	622	hypothetical protein	0.999999	63.2991	S	_FAS(ph)PPIEPVHQPAVSLPSYEQR_	0.66454	0.422066	0.578771	0.555125	22.1489
gi|472587743	RHTO_02967	192	hypothetical protein	0.933767	11.5234	S	_AAAVHSS(ph)PAFDPTS(ph)PNSNR_	0.657722	0.60562	0.671366	0.644903	5.38019
gi|472580652	RHTO_05967	38	hypothetical protein	0.99827	27.8094	S	_GLS(ph)SSGLNPR_	0.650068	0.740083	1.07681	0.82232	27.3546
gi|472587617	RHTO_02840	698	hypothetical protein	0.999989	49.9196	S	_SVS(ph)PAVSR_	0.647962	0.571821	0.399776	0.539853	23.5515
gi|472587180	RHTO_04859	7	hypothetical protein	1	67.3398	S	_RAS(ph)VGVDAADSPAAGGSAAGAGR_	0.634558	0.765697	0.738771	0.713009	9.71393
gi|472588415	RHTO_00315	469	hypothetical protein	0.999205	31.0374	S	_SPRPGS(ph)PFLSAADQAR_	0.617894	3.0281	3.09703	2.24767	62.8139
gi|472583102	RHTO_02371	577	hypothetical protein	0.999996	54.9274	T	_KVM(ox)SQASQSQPNT(ph)DVEEGSSVR_	0.610911	1.006	0.819068	0.811992	24.3398
gi|472585872	RHTO_07148	1121	hypothetical protein	0.774052	5.34762	T	_KDTT(ph)PAPAPVFGGLSPAK_	0.601612	#DIV/0!	0.843028	0.72232	23.6331
gi|472583102	RHTO_02371	516	hypothetical protein	1	70.2253	T	_TVKPPPSSAPQPT(ph)PK_	0.577167	0.387192	0.496672	0.48701	19.5798
gi|472582951	RHTO_02561	807	hypothetical protein	1	93.4784	S	_APFPPS(ph)PQQQR_	0.568053	0.345304	0.404433	0.439263	26.2683
gi|472586273	RHTO_06860	346	hypothetical protein	1	95.8477	S	_AAAAAASNAAQLS(ph)PR_	0.557258	0.540307	0.576435	0.558	3.23936
gi|472586325	RHTO_06912	1261	hypothetical protein	0.998807	29.1826	S	_AAARQS(ph)PTIS(ph)LR_	0.513268	0.317068	0.658588	0.496308	34.5331
gi|472582451	RHTO_03671	304	hypothetical protein	0.998212	27.5143	S	_RATS(ph)EES(ph)PSIVQNAFTR_	0.507279	0.127558	0.802568	0.479135	70.624
gi|472582451	RHTO_03671	301	hypothetical protein	0.940582	11.9962	S	_RATS(ph)EES(ph)PSIVQNAFTR_	0.507279	1.20937	#DIV/0!	0.858322	57.8395
gi|472586751	RHTO_06274	100	hypothetical protein	0.972989	15.5658	S	_M(ox)RYDPS(ph)EDEDEAQADGGNEEAGAEGTPGLASGR_	0.501983	#DIV/0!	0.24493	0.373456	48.6707
gi|472582951	RHTO_02561	796	hypothetical protein	0.91078	13.6666	S	_RQQYGDAASSVGAVAGSSS(ph)PVSTR_	0.4997	0.368868	0.366247	0.411605	18.5382
gi|472587045	RHTO_04723	337	hypothetical protein	0.92213	13.8597	S	_TRPSPSVLESPSAANS(ph)PTTSR_	0.49581	0.278156	0.805477	0.526481	50.3332
gi|472587024	RHTO_04702	459	hypothetical protein	1	132.473	S	_S(ph)LVDVLAGGVR_	0.454442	0.551055	1.01326	0.67292	44.3854
gi|472582250	RHTO_03990	450	hypothetical protein	1	101.896	S	_KKFAAFLGDQS(ph)S(ph)DS(ph)D_	0.436091	#DIV/0!	0.245152	0.340621	39.6376
gi|472582250	RHTO_03990	451	hypothetical protein	1	101.896	S	_KKFAAFLGDQS(ph)S(ph)DS(ph)D_	0.436091	#DIV/0!	0.245152	0.340621	39.6376
gi|472582250	RHTO_03990	453	hypothetical protein	1	101.896	S	_KKFAAFLGDQS(ph)S(ph)DS(ph)D_	0.436091	#DIV/0!	0.245152	0.340621	39.6376
gi|472587284	RHTO_04963	55	hypothetical protein	0.999908	40.3803	S	_AGS(ph)VTALR_	0.431984	0.365738	0.213826	0.337183	33.1711
gi|472587743	RHTO_02967	185	hypothetical protein	0.991988	20.9536	S	_AAAVHSS(ph)PAFDPTSPNSNR_	0.421461	0.200574	0.410458	0.344164	36.1673
gi|472588015	RHTO_03240	130	hypothetical protein	0.999994	52.3566	S	_RRS(ph)S(ph)AAS(ph)DLLSR_	0.372523	0.490052	0.846597	0.569724	43.3324
gi|472582451	RHTO_03671	764	hypothetical protein	0.988954	19.5227	S	_KAS(ph)M(ox)FAPGGQTSESDSDVAGSK_	0.371264	4.12575	#DIV/0!	2.24851	118.07
gi|472584226	RHTO_01479	104	hypothetical protein	0.999997	55.5017	S	_RM(ox)S(ph)ADT(ph)VPTVEEPR_	0.355999	0.42008	0.245555	0.340545	25.9239
gi|472582451	RHTO_03671	409	hypothetical protein	0.999936	42.2416	S	_RPS(ph)AAVSTR_	0.336734	0.359881	0.461936	0.386184	17.25
gi|472587743	RHTO_02967	513	hypothetical protein	0.953938	13.2626	S	_RASDVAASS(ph)PDPR_	0.332469	#DIV/0!	1.13869	0.735581	77.5015
gi|472587743	RHTO_02967	266	hypothetical protein	1	98.5078	S	_RLS(ph)GPAS(ph)PALR_	0.298454	0.177708	0.17711	0.217758	32.0934
gi|472585361	RHTO_07785	208	hypothetical protein	1	99.7468	S	_ALLS(ph)PLLS(ph)PQRR_	0.284438	0.308566	0.27505	0.289351	5.97527
gi|472587743	RHTO_02967	371	hypothetical protein	1	70.8041	S	_SLS(ph)VDAVR_	0.281413	0.331488	0.414817	0.342573	19.6716
gi|472582004	RHTO_04247	240	hypothetical protein	0.799308	5.96465	S	_KPS(ph)RPS(ph)TPSSAPLSAAPAR_	0.278118	0.135636	0.375136	0.262963	45.8115
gi|472582232	RHTO_03972	562	hypothetical protein	0.996892	25.9773	S	_KAS(ph)NTSIVS(ph)AASTR_	0.273755	0.132066	#DIV/0!	0.20291	49.3763
gi|472585361	RHTO_07785	714	hypothetical protein	1	143.793	S	_ASALSASYNALLAS(ph)PR_	0.26894	1.1202	0.537895	0.642344	67.7416
gi|472587743	RHTO_02967	507	hypothetical protein	1	84.7286	S	_RAS(ph)DVAASS(ph)PDPR_	0.2567	0.164279	0.252634	0.224538	23.2589
gi|472584999	RHTO_00853	114	hypothetical protein	0.999717	35.9311	S	_RPGT(ph)PPFS(ph)PSQSSFR_	0.229727	#DIV/0!	0.391604	0.310665	36.845
gi|472588590	RHTO_00490	532	hypothetical protein	0.996057	24.0288	S	_TSS(ph)LAPEGVK_	0.22552	3.04535	0.705467	1.32544	113.825
gi|472582451	RHTO_03671	676	hypothetical protein	1	101.386	S	_QFS(ph)IDEEGIM(ox)NR_	0.213625	2.09573	0.449014	0.919458	111.529
gi|472587284	RHTO_04963	589	hypothetical protein	0.999986	48.5405	T	_RAS(ph)T(ph)LVTR_	0.201983	1.20894	#DIV/0!	0.705462	100.93
gi|472580526	RHTO_06461	445	hypothetical protein	1	78.1239	S	_IQGETQAEPKS(ph)PLER_	0.193528	0.27126	0.437924	0.300904	41.4968
gi|472587743	RHTO_02967	358	hypothetical protein	0.992579	21.2629	S	_SGS(ph)IDHQVSDM(ox)QR_	0.190418	0.248781	0.287844	0.242348	20.2315
gi|472581676	RHTO_04400	397	hypothetical protein	1	84.1657	S	_ALPGS(ph)RRNS(ph)EES(ph)LGGR_	0.188979	#DIV/0!	0.337655	0.263317	39.9253
gi|472581676	RHTO_04400	401	hypothetical protein	1	84.1657	S	_ALPGS(ph)RRNS(ph)EES(ph)LGGR_	0.188979	#DIV/0!	0.337655	0.263317	39.9253
gi|472581676	RHTO_04400	404	hypothetical protein	1	84.1657	S	_ALPGS(ph)RRNS(ph)EES(ph)LGGR_	0.188979	#DIV/0!	0.337655	0.263317	39.9253
gi|472581847	RHTO_04337	84	hypothetical protein	1	95.7666	S	_RLS(ph)GLT(ph)EAGDDEADEAVQR_	0.169271	1.00534	1.29293	0.822511	70.967
gi|472587743	RHTO_02967	270	hypothetical protein	1	98.5078	S	_RLS(ph)GPAS(ph)PALR_	0.159269	0.274371	0.274876	0.236172	28.2001
gi|472582232	RHTO_03972	827	hypothetical protein	0.943215	12.2918	S	_NAS(ph)TTSLGPISR_	0.148666	0.374686	#DIV/0!	0.261676	61.0758
gi|472587284	RHTO_04963	85	hypothetical protein	0.999999	58.904	S	_RGS(ph)AEAGTGLYAR_	0.141717	0.110462	0.144718	0.132299	14.3394
gi|472587284	RHTO_04963	588	hypothetical protein	0.999988	49.1128	S	_RAS(ph)T(ph)LVTR_	0.131711	0.400673	0.240246	0.257543	52.5399
gi|472587743	RHTO_02967	288	hypothetical protein	1	93.6151	S	_GLAPLDTSDDVLLS(ph)PR_	0.130487	0.139171	0.229563	0.166407	32.9715
gi|472581676	RHTO_04400	426	hypothetical protein	0.968144	11.8254	S	_GGT(ph)SVRS(ph)RPLEDEASVAGVPGESTSR_	0.130017	0.180525	#DIV/0!	0.155271	23.0014
gi|472583977	RHTO_01653	572	hypothetical protein	0.999944	42.4826	S	_SAVEPRS(ph)PQQPQQPQQPQR_	0.129472	0.057402	0.246233	0.144369	66.0065
gi|472584891	RHTO_00745	12	Immunoglobulin E-set domain protein	1	94.7073	T	_RPFGEGAGT(ph)PPLDVPEK_	1.16298	#DIV/0!	0.734646	0.948813	31.9218
gi|472584891	RHTO_00745	524	Immunoglobulin E-set domain protein	0.999337	31.7875	S	_RVS(ph)PASSR_	1.0056	0.772022	#DIV/0!	0.888812	18.5827
gi|472584891	RHTO_00745	44	Immunoglobulin E-set domain protein	0.9998	36.9869	S	_SSS(ph)PGILGR_	0.662559	0.386787	0.528374	0.525907	26.2218
gi|472585618	RHTO_07511	255	Impact-like protein	1	86.1364	S	_EVERQEAEENS(ph)EPVEQPAVAGEVK_	3.90503	2.98766	2.5215	3.13806	22.4318
gi|472580784	RHTO_05809	109	Inner centromere protein, ARK-binding domain protein	0.994174	24.1564	S	_RSPAIGKENS(ph)PAASSGQSSSR_	0.665956	#DIV/0!	0.372162	0.519059	40.0231
gi|472580784	RHTO_05809	639	Inner centromere protein, ARK-binding domain protein	0.999948	42.8421	S	_FAS(ph)PPAS(ph)PRPASR_	0.429756	#DIV/0!	0.422529	0.426143	1.1992
gi|472580784	RHTO_05809	635	Inner centromere protein, ARK-binding domain protein	0.999994	51.9279	S	_FAS(ph)PPAS(ph)PRPASR_	0.429756	#DIV/0!	0.422529	0.426143	1.1992
gi|472587547	RHTO_02770	436	inner nuclear membrane protein MAN1	1	95.7666	S	_RKS(ph)S(ph)S(ph)PVEEIPHPR_	#DIV/0!	1.71928	1.51135	1.61531	9.10202
gi|472587547	RHTO_02770	206	inner nuclear membrane protein MAN1	0.999989	50.0308	S	_EYEAPLRGS(ph)DDDDSPVVSPR_	2.43297	1.91362	1.77211	2.03957	17.0609
gi|472587547	RHTO_02770	437	inner nuclear membrane protein MAN1	1	95.7666	S	_RKS(ph)S(ph)S(ph)PVEEIPHPR_	1.74764	2.42178	1.59436	1.92126	22.9112
gi|472587547	RHTO_02770	438	inner nuclear membrane protein MAN1	1	95.7666	S	_RKS(ph)S(ph)S(ph)PVEEIPHPR_	1.74764	1.69299	1.51135	1.65066	7.49411
gi|472587547	RHTO_02770	211	inner nuclear membrane protein MAN1	0.999781	36.6129	S	_EYEAPLRGS(ph)DDDDS(ph)PVVSPR_	1.02158	0.569022	0.842034	0.810877	28.1029
gi|472587547	RHTO_02770	460	inner nuclear membrane protein MAN1	1	104.257	S	_RFS(ph)DQNAIAVKPAPR_	0.647836	1.00897	0.704523	0.78711	24.6746
gi|472587547	RHTO_02770	279	inner nuclear membrane protein MAN1	1	86.2877	S	_RKS(ph)S(ph)LGPAR_	0.313578	0.615915	0.517411	0.482301	31.9709
gi|472587401	RHTO_05080	1017	inositol or phosphatidylinositol phosphatase	0.989481	20.9142	S	_KKFTLS(ph)GS(ph)PSSSSPEISR_	#DIV/0!	0.668315	2.09921	1.38376	73.1191
gi|472580420	RHTO_06596	652	inositol/phosphatidylinositol phosphatase	0.999213	31.0386	S	_KESLLPSLSS(ph)PQIKQE_	2.11676	1.08373	1.64298	1.61449	32.029
gi|472580420	RHTO_06596	645	inositol/phosphatidylinositol phosphatase	0.999988	52.8196	S	_KES(ph)LLPSLSSPQIKQE_	0.266227	0.294568	0.565099	0.375298	43.9604
gi|472580533	RHTO_06468	404	inositol-3-phosphate synthase	1	95.4772	S	_NLS(ph)APAQFR_	1.06381	1.32712	0.686248	1.02573	31.4051
gi|472584003	RHTO_01679	326	inositolphosphorylceramide synthase	0.933678	14.2145	S	_ASS(ph)SAIPLDEESGLPR_	0.695507	0.270878	0.56494	0.510442	42.6096
gi|472584003	RHTO_01679	325	inositolphosphorylceramide synthase	0.995503	22.696	S	_ARAS(ph)S(ph)SAIPLDEESGLPR_	0.695507	0.481649	0.729129	0.635428	21.1249
gi|472584583	RHTO_00923	329	integral membrane DUF1751 family protein	0.975283	15.9614	S	_ASS(ph)PAASPASPTTAR_	1.61431	1.42576	1.35838	1.46615	9.04806
gi|472586270	RHTO_06857	517	integral membrane protein	0.982194	17.4457	S	_ATVEYESLPLTAGRDS(ph)VDAR_	3.34381	#DIV/0!	1.70727	2.52554	45.8202
gi|472587644	RHTO_02868	395	integral membrane protein, nucleotide-sugar transporter	0.998212	27.4692	S	_EIELPGVEADDVPDS(ph)DYDDER_	#DIV/0!	2.44063	2.22568	2.33316	6.51437
gi|472582582	RHTO_03496	221	ion channel	1	167.988	T	_RIGDDQRPFLLDT(ph)DEED_	1.1681	0.542594	0.990197	0.900297	35.7991
gi|472586452	RHTO_07039	296	IRSp53/MIM homology domain containing protein	0.999923	41.2001	S	_KVLS(ph)DGASTR_	4.84402	2.6588	2.23299	3.24527	43.1654
gi|472586452	RHTO_07039	368	IRSp53/MIM homology domain containing protein	0.84357	5.92338	S	_GSERPAPDNDLDDRS(ph)S(ph)GRAAS(ph)S(ph)SPLHSR_	3.69058	3.11313	#DIV/0!	3.40186	12.0028
gi|472581557	RHTO_04477	158	jumonji domain containing protein	0.977177	16.3161	S	_GGEGPLNPDEPTLAEITPM(ox)KEDS(ph)GEPVAAAK_	7.33245	#DIV/0!	3.12237	5.22741	56.9495
gi|472585648	RHTO_07541	321	jumonji domain containing protein	1	66.8452	T	_GKELVEEPAEPELT(ph)PEQAADLEEAK_	4.25804	4.11929	1.88505	3.42079	38.9325
gi|472580302	RHTO_06698	12	K Homology domain containing protein	1	72.3159	S	_WDEPQS(ph)QS(ph)PQPGAPAPPDHK_	5.93577	2.75141	2.43778	3.70832	52.1906
gi|472581282	RHTO_05398	898	K Homology domain containing protein	0.972503	15.4861	S	_LAASS(ph)PNIK_	1.113	0.460808	0.617665	0.730492	46.6017
gi|472581282	RHTO_05398	57	K Homology domain containing protein	0.844404	7.34552	S	_AQGHQAS(ph)QSDGAVAVATPSAAASSASPTEASSATR_	0.989413	0.800641	0.939585	0.909879	10.7519
gi|472580302	RHTO_06698	14	K Homology domain containing protein	1	72.3159	S	_WDEPQS(ph)QS(ph)PQPGAPAPPDHK_	0.943307	1.43178	1.14206	1.17238	20.9526
gi|472581282	RHTO_05398	142	K Homology domain containing protein	1	83.3699	S	_RNS(ph)VDFNDAM(ox)QR_	0.885191	0.982415	0.586373	0.817993	25.2319
gi|472587422	RHTO_05101	384	K Homology domain containing protein	1	101.528	S	_RVQS(ph)VQEEQAAAAQQAK_	0.56899	0.145087	1.47078	0.728287	92.965
gi|472581282	RHTO_05398	897	K Homology domain containing protein	0.997121	25.3951	S	_LAAS(ph)SPNIK_	0.0602773	0.10235	0.155137	0.105922	44.8736
gi|472583969	RHTO_01645	574	Kelch-type beta propeller domain containing protein	0.974452	15.814	S	_RGS(ph)GSGQGHLGPADDDVEEQTR_	3.70206	3.09905	2.85079	3.2173	13.6071
gi|472587813	RHTO_03037	921	kexin	1	74.5608	S	_DLFNAFALNS(ph)DEEDDS(ph)GDEGQELVQHKR_	1.06415	0.754489	#DIV/0!	0.909318	24.0797
gi|472587813	RHTO_03037	927	kexin	1	74.5608	S	_DLFNAFALNS(ph)DEEDDS(ph)GDEGQELVQHKR_	1.06415	0.754489	#DIV/0!	0.909318	24.0797
gi|472581915	RHTO_04158	808	kinesin family member 20/23	0.942299	17.0015	S	_KISLTPSTAYDDS(ph)DDGEAGEGEEEEEEEVEK_	0.95338	1.87294	1.21659	1.34764	35.1415
gi|472587622	RHTO_02845	923	kinesin family member 4/7/21/27	0.771168	5.99629	S	_VGGEEDEKGDAVQELADS(ph)PTSTR_	2.80836	1.18538	#DIV/0!	1.99687	57.4708
gi|472587622	RHTO_02845	2047	kinesin family member 4/7/21/27	0.995989	26.9604	S	_AM(ox)S(ph)PTSDLDR_	2.01151	1.35984	1.20308	1.52481	28.1162
gi|472587622	RHTO_02845	2115	kinesin family member 4/7/21/27	0.781661	5.938	S	_RSS(ph)ASSTATAATEHR_	1.27341	0.327643	0.847386	0.816148	58.0359
gi|472587622	RHTO_02845	310	kinesin family member 4/7/21/27	0.999034	30.1448	S	_VSS(ph)PVPGGR_	0.391389	0.822233	0.77688	0.663501	35.681
gi|472587622	RHTO_02845	2118	kinesin family member 4/7/21/27	0.804768	9.81142	S	_RSSAS(ph)S(ph)TATAATEHR_	0.329772	0.327643	#DIV/0!	0.328708	0.457885
gi|472581678	RHTO_04402	414	kinesin family member 5	0.996332	24.4252	S	_LVGGPAKS(ph)PTPGSAPGR_	3.23091	2.43031	2.22677	2.62933	20.1888
gi|472588275	RHTO_00175	242	kinetochore protein Nuf2	0.889216	9.04539	S	_LVVSDLQTQIVSS(ph)PDKLQGR_	1.7962	#DIV/0!	0.987849	1.39203	41.0619
gi|472583000	RHTO_02610	182	KRR1 interacting protein 1	1	120.784	S	_AAFLGS(ph)DADGSDDEDEDGFLR_	1.27647	1.17684	0.796432	1.08325	23.3867
gi|472583000	RHTO_02610	187	KRR1 interacting protein 1	1	95.3237	S	_AAFLGSDADGS(ph)DDEDEDGFLR_	0.975419	1.03415	0.68956	0.899709	20.4897
gi|472584241	RHTO_01494	67	L-aminoadipate-semialdehyde dehydrogenase	0.999933	43.9286	S	_LSLYDEHEGES(ph)DDES(ph)DADDADSHLNRK_	1.20907	1.19339	0.625939	1.00947	32.9122
gi|472584241	RHTO_01494	866	L-aminoadipate-semialdehyde dehydrogenase	1	75.2499	S	_ELEGLVS(ph)GDEDEDEADSKR_	1.04478	2.49632	0.691133	1.41074	67.8096
gi|472584241	RHTO_01494	71	L-aminoadipate-semialdehyde dehydrogenase	0.999999	61.726	S	_LSLYDEHEGES(ph)DDES(ph)DADDADSHLNR_	0.905879	1.26918	0.604303	0.926454	35.9344
gi|472582694	RHTO_03608	159	late endosome to vacuole transport-related protein	0.956651	13.4377	T	_EGRT(ph)PTPGPAGGPQEGEEDAVETSR_	1.46505	1.74013	1.00246	1.40255	26.5794
gi|472581247	RHTO_05363	152	late secretory pathway protein AVL9 family protein	0.992364	24.5013	S	_RTTS(ph)SQGATIGAK_	#DIV/0!	1.51609	1.44296	1.47953	3.49525
gi|472581743	RHTO_04467	1208	leucine-rich repeat containing protein 68	1	158.132	S	_KGVALGVDDVPS(ph)EDEEGEGEDAEER_	2.18088	1.32947	1.2427	1.58435	32.722
gi|472581743	RHTO_04467	1244	leucine-rich repeat containing protein 68	0.999997	55.3727	S	_EILGTPVTRS(ph)PR_	2.1646	1.01574	0.927816	1.36939	50.393
gi|472581743	RHTO_04467	559	leucine-rich repeat containing protein 68	1	114.92	S	_KVGGLWDDDDDS(ph)DAEEGAQAEGAAK_	2.02012	1.187	0.954472	1.3872	40.3924
gi|472587215	RHTO_04894	1084	lipin 1	0.976044	16.5243	S	_STTS(ph)EAEAYKK_	1.93562	1.00417	#DIV/0!	1.46989	44.8085
gi|472587215	RHTO_04894	1055	lipin 1	0.782843	8.048	S	_SS(ph)SM(ox)PGSFDESDFDRYR_	1.73373	1.65311	#DIV/0!	1.69342	3.36646
gi|472580810	RHTO_05835	356	LisH dimerisation motif containing protein	0.999938	42.0666	S	_QLS(ph)GQLYQQQQQQQFQQQQR_	#DIV/0!	0.879894	0.4588	0.669347	44.485
gi|472587671	RHTO_02895	246	LisH dimerisation motif containing protein	0.999046	30.1991	S	_LAPTHPLS(ph)PK_	1.44225	0.822233	0.820277	1.02825	34.8682
gi|472586512	RHTO_06035	117	lysine-trna ligase	0.999997	55.545	S	_TNAADDEEELS(ph)PNQYYEIR_	#DIV/0!	0.432882	0.596445	0.514663	22.4723
gi|472584661	RHTO_01001	660	lysophospholipid hydrolase	0.776619	8.64329	T	_YRQPGSSFTT(ph)SPK_	#DIV/0!	0.312412	0.352647	0.332529	8.55566
gi|472587398	RHTO_05077	991	M protein repeat protein	1	122.951	S	_LEHEVQLYRDS(ph)EE_	4.00208	#DIV/0!	1.4775	2.73979	65.1565
gi|472587398	RHTO_05077	322	M protein repeat protein	0.931158	14.3846	S	_SSAS(ph)TGVVGRPAASGAAALK_	1.02737	1.45294	0.743937	1.07475	33.2048
gi|472587398	RHTO_05077	313	M protein repeat protein	0.866198	9.45634	S	_ARPSTTTATARPGS(ph)SLSTR_	0.221685	1.53163	#DIV/0!	0.876657	105.659
gi|472587398	RHTO_05077	316	M protein repeat protein	0.84205	11.1513	S	_ARPSTTTATARPGSSLS(ph)T(ph)R_	0.141215	0.614326	0.589901	0.448481	59.3961
gi|472587398	RHTO_05077	320	M protein repeat protein	0.816835	6.72687	S	_SS(ph)ASTGVVGRPAASGAAALK_	0.141215	6.84978	#DIV/0!	3.4955	135.708
gi|472583144	RHTO_02414	258	Machado-Joseph disease protein 1 (Ataxin-3)	1	87.5814	S	_RPAS(ph)DDDDDDDDIIIEEPSASGSGSGR_	0.655738	0.582988	0.343395	0.527374	30.9894
gi|472586483	RHTO_06006	202	MAGE family protein	0.870424	8.29263	S	_TLASEPSADLTADS(ph)GGKR_	2.08938	1.65544	#DIV/0!	1.87241	16.3878
gi|472583974	RHTO_01650	10	magnesium ion transporter	0.760306	7.79548	S	_(ac)M(ox)S(ph)IRRSLLAS(ph)FASPLALGS(ph)APR_	3.89924	0.849113	0.82672	1.85836	95.1105
gi|472583974	RHTO_01650	19	magnesium ion transporter	0.967181	14.5346	S	_(ac)M(ox)S(ph)IRRSLLAS(ph)FASPLALGS(ph)APR_	3.89924	0.849113	0.82672	1.85836	95.1105
gi|472583974	RHTO_01650	2	magnesium ion transporter	0.999296	31.6237	S	_(ac)M(ox)S(ph)IRRSLLAS(ph)FASPLALGS(ph)APR_	3.89924	0.849113	1.12937	1.95924	86.0498
gi|472585303	RHTO_07727	13	major facilitator superfamily protein	0.955432	14.264	S	_AIDSPALS(ph)QS(ph)PTLEGADDERK_	0.648172	0.298178	0.472322	0.472891	37.0059
gi|472585303	RHTO_07727	7	major facilitator superfamily protein	0.999908	41.1316	S	_AIDS(ph)PALS(ph)QSPTLEGADDERK_	0.644288	0.373315	0.351124	0.456242	35.7771
gi|472585303	RHTO_07727	11	major facilitator superfamily protein	0.952318	14.264	S	_AIDSPALS(ph)QS(ph)PTLEGADDERK_	0.32477	0.2597	0.472322	0.352264	30.927
gi|472585303	RHTO_07727	15	major facilitator superfamily protein	0.773756	7.52853	T	_AIDS(ph)PALSQSPT(ph)LEGADDERK_	0.264627	0.202229	#DIV/0!	0.233428	18.902
gi|472585694	RHTO_07587	300	mannose-1-phosphate guanylyltransferase	0.999995	52.8604	T	_RSPT(ph)ILAK_	0.284406	0.359054	0.611359	0.418273	40.9619
gi|472582343	RHTO_03833	512	mechanosensitive ion channel MscS domain containing protein	0.999999	62.1639	S	_QVS(ph)DPTLLIK_	0.906372	1.19197	0.89815	0.998829	16.7508
gi|472586776	RHTO_06299	1825	Mediator complex, subunit Med12	0.999999	62.9872	S	_STTEVVVLDS(ph)DDEAEAPSKPK_	1.29634	0.843597	0.937647	1.02586	23.2894
gi|472586442	RHTO_07029	160	membrane anchor Opy2, N-terminal domain containing protein	0.968423	15.8259	S	_EGGALIS(ph)GRTSEDDNPFGDQNR_	1.67336	#DIV/0!	1.03518	1.35427	33.3217
gi|472583831	RHTO_01921	294	metallo-beta-lactamase domain containing protein	0.957099	14.4174	S	_LFSGHNYPSS(ph)PSFEDGNR_	2.3681	1.58484	1.10203	1.68499	37.9202
gi|472587765	RHTO_02988	481	methylenetetrahydrofolate dehydrogenase (NADP+) / methenyltetrahydrofolate cyclohydrolase / formyltetrahydrofolate synthetase	0.999765	36.2929	S	_QPS(ph)QGPTFGIK_	1.68731	1.3565	#DIV/0!	1.52191	15.3699
gi|472581735	RHTO_04459	4	methylthioribose-1-phosphate isomerase	0.999412	32.3057	T	_SPT(ph)PVDDAPVLGAFR_	3.6523	3.59686	2.39607	3.21508	22.0779
gi|472583196	RHTO_02466	138	Methyltransferase-related protein	0.955478	13.3164	S	_GDVSS(ph)PVGR_	1.33567	0.905387	1.07468	1.10524	19.6121
gi|472580564	RHTO_06396	127	MFS efflux transporter	0.999849	38.3189	S	_RGS(ph)VSQTEAEVAR_	0.847099	0.683761	1.29872	0.943193	33.7727
gi|472580964	RHTO_05655	30	MFS monocarboxylate transporter	0.75737	6.93718	S	_ALEPIELDAITPAPPSPAHSRPST(ph)PPS(ph)LK_	2.03087	0.671276	#DIV/0!	1.35107	71.1566
gi|472582465	RHTO_03685	23	MFS monosaccharide transporter	0.999995	53.4325	S	_EFAHNS(ph)PAPSR_	3.19183	1.15656	1.10379	1.81739	65.5107
gi|472582465	RHTO_03685	585	MFS monosaccharide transporter	0.995858	23.8094	S	_LGLDPEDELPTRPS(ph)DAER_	1.52121	0.59577	0.608976	0.908653	58.3868
gi|472584219	RHTO_01472	471	MFS phospholipid transporter	0.999999	61.8922	S	_QYLADHGYDISQM(ox)GTSDAGS(ph)IQER_	4.20451	5.95096	4.76077	4.97208	17.9442
gi|472584219	RHTO_01472	467	MFS phospholipid transporter	0.845258	6.88087	S	_QYLADHGYDISQM(ox)GTS(ph)DAGS(ph)IQER_	3.22539	3.85698	1.25557	2.77931	48.82
gi|472587414	RHTO_05093	50	MFS transporter	0.800154	5.9587	T	_SYASSITAAPAVDKTLS(ph)T(ph)DSDALSR_	#DIV/0!	1.33289	1.35811	1.3455	1.3252
gi|472587414	RHTO_05093	37	MFS transporter	0.980065	16.9381	S	_SYASS(ph)ITAAPAVDK_	#DIV/0!	1.07687	1.3808	1.22883	17.489
gi|472587414	RHTO_05093	49	MFS transporter	0.993291	21.9983	S	_TLS(ph)TDSDALSR_	#DIV/0!	4.25333	0.41377	2.33355	116.345
gi|472587414	RHTO_05093	52	MFS transporter	0.999968	44.9619	S	_TLSTDS(ph)DALSR_	6.6011	3.00111	2.5457	4.0493	54.8643
gi|472587414	RHTO_05093	56	MFS transporter	0.999949	42.9057	S	_TLSTDSDALS(ph)R_	2.66887	#DIV/0!	2.50614	2.58751	4.44712
gi|472584644	RHTO_00984	12	MFS transporter	1	89.0329	S	_LDVEKES(ph)S(ph)LADDEYGAHVVR_	0.298972	0.290689	0.297354	0.295671	1.48473
gi|472584644	RHTO_00984	11	MFS transporter	1	94.404	S	_LDVEKES(ph)S(ph)LADDEYGAHVVR_	0.282358	0.303003	0.254758	0.28004	8.64378
gi|472586235	RHTO_06822	14	MFS transporter, PHS family, inorganic phosphate transporter	1	101.472	S	_EAAIS(ph)EPS(ph)LNQQGGAVDLNAR_	7.35727	11.5217	9.84349	9.57414	21.8842
gi|472586235	RHTO_06822	11	MFS transporter, PHS family, inorganic phosphate transporter	1	101.472	S	_EAAIS(ph)EPS(ph)LNQQGGAVDLNAR_	5.68893	3.90442	6.57592	5.38976	25.245
gi|472584985	RHTO_00839	22	MFS transporter, SP family, solute carrier family 2 (myo-inositol transporter), member 13	0.978883	18.4205	S	_SNS(ph)SGELDFDKLNNTATLK_	#DIV/0!	1.30598	0.292415	0.799196	89.6772
gi|472584985	RHTO_00839	23	MFS transporter, SP family, solute carrier family 2 (myo-inositol transporter), member 13	0.992321	20.3657	S	_SNS(ph)S(ph)GELDFDKLNNTATLK_	0.770654	1.30598	#DIV/0!	1.03832	36.4563
gi|472581205	RHTO_05522	513	MFS transporter, sugar transporter	0.999966	44.6875	S	_TLS(ph)GAS(ph)LPGR_	4.86027	4.00705	1.74283	3.53672	45.5525
gi|472581205	RHTO_05522	516	MFS transporter, sugar transporter	0.999999	60.1126	S	_TLS(ph)GAS(ph)LPGR_	2.04182	2.81144	3.33834	2.73053	23.8795
gi|472583833	RHTO_01923	19	MFS transporter, sugar transporter	0.99976	36.2044	S	_DTALHDS(ph)PIAPSFDADLK_	1.22904	0.809127	#DIV/0!	1.01909	29.1366
gi|472581777	RHTO_04266	43	MFS transporter, sugar:H+ symporter	0.953112	11.5191	T	_EGHS(ph)APS(ph)SRPGS(ph)T(ph)FHPQDELDGVPSK_	#DIV/0!	1.39486	1.30858	1.35172	4.5135
gi|472581777	RHTO_04266	34	MFS transporter, sugar:H+ symporter	0.98153	15.6515	S	_EGHS(ph)APS(ph)SRPGS(ph)T(ph)FHPQDELDGVPSK_	0.837661	0.909504	1.18184	0.976334	18.5961
gi|472581777	RHTO_04266	42	MFS transporter, sugar:H+ symporter	0.840616	6.01833	S	_EGHS(ph)APS(ph)SRPGS(ph)T(ph)FHPQDELDGVPSK_	0.443675	0.698032	0.941354	0.694354	35.8405
gi|472581777	RHTO_04266	37	MFS transporter, sugar:H+ symporter	0.908615	11.8417	S	_EGHS(ph)APS(ph)S(ph)RPGSTFHPQDELDGVPSK_	0.443675	0.698032	0.894614	0.678774	33.3079
gi|472581777	RHTO_04266	38	MFS transporter, sugar:H+ symporter	0.908616	11.8417	S	_EGHS(ph)APS(ph)S(ph)RPGSTFHPQDELDGVPSK_	0.443125	0.463285	1.30858	0.738328	66.9013
gi|472581777	RHTO_04266	19	MFS transporter, sugar:H+ symporter	0.998856	30.515	S	_ATTLAGS(ph)AAPSR_	0.111904	0.215466	0.705069	0.344147	92.062
gi|472586464	RHTO_07051	838	MHYT domain signalling protein	0.999988	52.2475	T	_ASGTDAGSARPNT(ph)GGS(ph)VVEAAR_	2.53846	2.70812	2.03091	2.42583	14.5259
gi|472586464	RHTO_07051	841	MHYT domain signalling protein	1	75.7425	S	_ASGTDAGSARPNT(ph)GGS(ph)VVEAAR_	2.45791	0.979144	1.33364	1.59023	48.5498
gi|472588046	RHTO_03271	1269	microtubule associated protein	0.992745	23.8744	S	_AAASASSSRPASTVSTSS(ph)AAS(ph)VKEPPFR_	5.13769	2.65343	4.1561	3.98241	31.4182
gi|472588046	RHTO_03271	1187	microtubule associated protein	0.999994	51.8713	S	_QAAPPARLS(ph)DPPTAPAAPSAPQPR_	1.7368	1.11975	1.77942	1.54532	23.89
gi|472588469	RHTO_00369	447	microtubule binding protein	1	76.7993	S	_AAT(ph)PPRAAS(ph)PPPPVPAPVAAAPR_	3.04414	2.37541	1.85887	2.42614	24.494
gi|472588469	RHTO_00369	441	microtubule binding protein	1	76.7993	T	_AAT(ph)PPRAAS(ph)PPPPVPAPVAAAPR_	1.30468	0.848608	1.02721	1.06017	21.6774
gi|472581956	RHTO_04199	109	minichromosome maintenance protein 1	1	78.4522	S	_KTAPPIIAFDPS(ph)ADGS(ph)DDDDDDEEGGPKK_	3.57692	2.05271	1.64935	2.42633	41.9007
gi|472581956	RHTO_04199	113	minichromosome maintenance protein 1	1	81.7113	S	_KTAPPIIAFDPS(ph)ADGS(ph)DDDDDDEEGGPKK_	2.48973	1.39194	1.34684	1.74284	37.1361
gi|472584220	RHTO_01473	104	minichromosome maintenance protein 2	1	76.1051	S	_KLDVYDQADLNDQDDFS(ph)DDQDARR_	2.06441	1.27722	1.42584	1.58916	26.318
gi|472584220	RHTO_01473	150	minichromosome maintenance protein 2	1	73.6488	S	_M(ox)PGFLAS(ph)DEEDS(ph)EDEGQLLGRR_	0.641972	0.345137	0.243114	0.410074	50.5291
gi|472584220	RHTO_01473	145	minichromosome maintenance protein 2	1	73.6488	S	_M(ox)PGFLAS(ph)DEEDS(ph)EDEGQLLGRR_	0.641972	3.07427	0.243114	1.31979	116.114
gi|472583380	RHTO_02327	804	minichromosome maintenance protein 3	1	58.4976	T	_M(ox)EEDEDEQAAAGT(ph)PT(ph)PPPVPAVEQAEK_	1.45351	#DIV/0!	0.887784	1.17065	34.1716
gi|472583380	RHTO_02327	806	minichromosome maintenance protein 3	1	58.4976	T	_M(ox)EEDEDEQAAAGT(ph)PT(ph)PPPVPAVEQAEK_	1.45351	#DIV/0!	0.887784	1.17065	34.1716
gi|472584311	RHTO_01119	792	minichromosome maintenance protein 6	0.802118	8.58636	T	_TASAT(ph)PAPAPAQQPK_	#DIV/0!	1.26119	1.50328	1.38224	12.3846
gi|472584311	RHTO_01119	790	minichromosome maintenance protein 6	0.964759	14.9246	S	_TAS(ph)ATPAPAPAQQPK_	2.1767	1.43697	1.06074	1.55814	36.4387
gi|472584311	RHTO_01119	101	minichromosome maintenance protein 6	0.994612	22.8537	S	_ALPTSSLTSGGPS(ph)S(ph)TASR_	0.911411	0.649266	0.680365	0.747014	19.1721
gi|472584311	RHTO_01119	100	minichromosome maintenance protein 6	0.999716	36.5449	S	_ALPTSSLTSGGPS(ph)S(ph)TASR_	0.911411	0.649266	0.680365	0.747014	19.1721
gi|472585181	RHTO_08100	7	mitochondrial division protein	0.999588	34.1538	S	_STGS(ph)GDGFFAGIK_	1.06699	0.665247	0.641355	0.791196	30.2251
gi|472588208	RHTO_00108	765	mitochondrial outer membrane protein, MIM1/TOM13	0.995836	23.7722	S	_RRSS(ph)S(ph)PPPPPGK_	1.23226	0.928074	0.831117	0.997149	20.9898
gi|472588208	RHTO_00108	392	mitochondrial outer membrane protein, MIM1/TOM13	0.995376	23.3303	S	_ISGAVQES(ph)PVADISWR_	1.06576	0.830013	1.41818	1.10465	26.7963
gi|472588208	RHTO_00108	763	mitochondrial outer membrane protein, MIM1/TOM13	0.993852	21.4238	S	_RRS(ph)S(ph)SPPPPPGK_	0.978857	0.972479	0.908018	0.953118	4.11153
gi|472588208	RHTO_00108	764	mitochondrial outer membrane protein, MIM1/TOM13	0.99663	24.6909	S	_RRSS(ph)S(ph)PPPPPGK_	0.869187	0.868357	0.901226	0.87959	2.13072
gi|472581642	RHTO_04563	103	mitochondrial outer membrane translocase receptor TOM70	0.999871	38.9566	S	_SADDDDDSLKLTAS(ph)DIEVM(ox)DPETR_	0.785978	1.17784	0.561104	0.841642	37.084
gi|472588574	RHTO_00474	51	mitochondrial phosphate carrier protein	0.960731	13.8971	S	_ASHAAS(ph)SVGDKVDGAR_	0.355568	0.374995	0.497661	0.409408	18.8184
gi|472585268	RHTO_07692	456	mitochondrion organization and biogenesis-related protein	0.9521	15.8445	S	_TGSTGSLTAHGS(ph)PSTATAR_	#DIV/0!	9.15081	2.85968	6.00524	74.077
gi|472585268	RHTO_07692	809	mitochondrion organization and biogenesis-related protein	0.990763	20.2638	S	_KAPS(ph)ELS(ph)DYFPAATAGAR_	#DIV/0!	0.354648	0.813008	0.583828	55.5146
gi|472585268	RHTO_07692	812	mitochondrion organization and biogenesis-related protein	0.990763	20.2638	S	_KAPS(ph)ELS(ph)DYFPAATAGAR_	#DIV/0!	0.354648	0.813008	0.583828	55.5146
gi|472580771	RHTO_05796	109	molecular chaperone DnaK	1	118.757	S	_KFS(ph)DAEVQK_	0.322445	0.476077	0.472858	0.423794	20.714
gi|472580771	RHTO_05796	351	molecular chaperone DnaK	1	80.1016	S	_ALS(ph)DAGM(ox)K_	0.203314	0.154751	0.0968617	0.151642	35.1447
gi|472587543	RHTO_02766	139	mRNA (guanine-N7-)-methyltransferase	1	90.7309	S	_QDS(ph)PIIGLK_	2.37186	#DIV/0!	1.50399	1.93792	31.6669
gi|472585992	RHTO_07268	834	mRNA 3'-end-processing protein RNA14	0.999994	52.3096	S	_GLS(ph)VDRDGTDGQDQDGGDAK_	1.50902	1.69981	1.22739	1.47874	16.0721
gi|472584386	RHTO_01195	222	mRNA binding post-transcriptional regulator (Csx1)	0.999999	62.3802	S	_SFAS(ph)PPLANAR_	0.909256	0.525845	0.53859	0.657897	33.1019
gi|472586854	RHTO_06377	191	mRNA binding protein Pumilio	0.996868	25.6704	S	_SSS(ph)PASM(ox)TDSLR_	0.861549	#DIV/0!	0.550661	0.706105	31.1329
gi|472586854	RHTO_06377	116	mRNA binding protein Pumilio	1	119.092	S	_AGHGGPAS(ph)LDGLDDGTAASR_	0.614439	0.709069	0.883783	0.735764	18.5714
gi|472586854	RHTO_06377	25	mRNA binding protein Pumilio	0.999999	63.51	S	_RQS(ph)FDPLSSSNK_	0.140404	0.245984	0.296577	0.227655	35.0019
gi|472581781	RHTO_04270	73	mRNA capping enzyme	0.785393	6.27517	S	_KAS(ph)SPS(ph)PTAM(ox)PPSAAATASPGPVGFR_	#DIV/0!	1.88726	1.32008	1.60367	25.0085
gi|472581781	RHTO_04270	165	mRNA capping enzyme	0.854444	12.5995	T	_RSS(ph)S(ph)T(ph)SSTPAPAPSTPTIPR_	1.26711	#DIV/0!	1.04802	1.15756	13.383
gi|472582026	RHTO_04020	527	mRNA-decapping enzyme 1B	0.999998	58.2856	S	_TIPS(ph)PPAAPVTVK_	1.97052	1.24648	0.874432	1.36381	40.8697
gi|472583579	RHTO_02083	33	Mtw1 kinetochore complex, DSN1	0.999998	56.7137	S	_KSVVPDPDLYAQS(ph)DS(ph)DDDNAAPAR_	3.01932	2.17344	1.48047	2.22441	34.6469
gi|472583579	RHTO_02083	31	Mtw1 kinetochore complex, DSN1	0.999965	44.5995	S	_KSVVPDPDLYAQS(ph)DS(ph)DDDNAAPAR_	2.14542	1.43107	1.18725	1.58791	31.3598
gi|472583579	RHTO_02083	82	Mtw1 kinetochore complex, DSN1	0.99999	51.1754	S	_STRLS(ph)AES(ph)QDALEAAR_	2.04566	0.181597	2.02885	1.4187	75.5195
gi|472583579	RHTO_02083	85	Mtw1 kinetochore complex, DSN1	1	90.8498	S	_STRLS(ph)AES(ph)QDALEAAR_	2.04566	0.181597	2.02885	1.4187	75.5195
gi|472582716	RHTO_03306	1071	MYB DNA binding protein	1	88.6117	S	_TLPQGPRPNETDDES(ph)S(ph)E_	2.77269	1.84077	1.35637	1.98995	36.1742
gi|472582716	RHTO_03306	1072	MYB DNA binding protein	1	88.6117	S	_TLPQGPRPNETDDES(ph)S(ph)E_	2.77269	1.84077	1.35637	1.98995	36.1742
gi|472582716	RHTO_03306	929	MYB DNA binding protein	0.99992	40.9851	S	_RSEEVFS(ph)DDDAPAAR_	2.2023	#DIV/0!	0.904895	1.5536	59.0504
gi|472582716	RHTO_03306	1067	MYB DNA binding protein	1	159.386	T	_TLPQGPRPNET(ph)DDES(ph)S(ph)E_	1.92396	1.28446	1.55666	1.58836	20.2052
gi|472582716	RHTO_03306	696	MYB DNA binding protein	0.964951	14.4584	S	_IAFDS(ph)QSQSAS(ph)PAPPPPKK_	0.574317	2.3982	2.00032	1.65761	57.8556
gi|472582716	RHTO_03306	690	MYB DNA binding protein	0.934121	13.8074	S	_IAFDS(ph)QSQSAS(ph)PAPPPPKK_	0.571559	2.3982	2.00032	1.65669	57.9817
gi|472585944	RHTO_07220	272	Myb-like DNA-binding protein, REB1	0.852014	7.60228	S	_APDHASTSASLPDPQDQIVS(ph)PTVER_	#DIV/0!	0.648719	0.686813	0.667766	4.03387
gi|472584438	RHTO_01247	1612	myosin heavy chain	1	92.224	S	_ASLQFAPPPAGPNS(ph)PR_	0.776398	0.393902	0.582547	0.584282	32.7331
gi|472580751	RHTO_05926	34	myosin regulatory light chain 9	0.987369	18.9306	S	_ESS(ph)GAYQLFDAK_	1.08917	1.02169	#DIV/0!	1.05543	4.52095
gi|472588207	RHTO_00107	370	myosin-1	0.982728	17.5508	Y	_GSVY(ph)EVPLNQAQAAAVR_	#DIV/0!	1.61896	1.54283	1.5809	3.40527
gi|472588207	RHTO_00107	368	myosin-1	1	122.94	S	_RGS(ph)VYEVPLNQAQAAAVR_	1.16944	0.981162	1.20745	1.11935	10.8255
gi|472588207	RHTO_00107	787	myosin-1	0.999586	36.6155	S	_RYS(ph)LVSM(ox)R_	0.490605	#DIV/0!	0.65937	0.574987	20.7543
gi|472586241	RHTO_06828	490	N-acyl-phosphatidylethanolamine-hydrolyzing phospholipase D	0.998401	27.954	S	_SSS(ph)FSQTLR_	0.670646	#DIV/0!	0.519859	0.595252	17.9122
gi|472587490	RHTO_02712	21	NAD dependent oxidoreductase	0.999979	46.7749	S	_RPS(ph)IATTR_	1.26597	1.53957	0.93668	1.24741	24.2002
gi|472581342	RHTO_05244	116	NADH dehydrogenase (ubiquinone) 1 alpha subcomplex 8	1	77.8945	S	_DIPGS(ph)PEGKPQIHEK_	#DIV/0!	0.190862	0.194367	0.192614	1.28697
gi|472580568	RHTO_06400	54	NADH oxidase	1	74.0293	S	_GGS(ph)ALVLT(ph)GHVM(ox)IDPR_	#DIV/0!	1.92764	3.23509	2.58137	35.8149
gi|472580568	RHTO_06400	59	NADH oxidase	1	74.0293	T	_GGS(ph)ALVLT(ph)GHVM(ox)IDPR_	#DIV/0!	1.92764	3.23509	2.58137	35.8149
gi|472586437	RHTO_07024	32	nascent polypeptide-associated complex subunit alpha	1	101.647	S	_S(ph)ALLAIQDPEVYK_	1.64428	4.42693	1.53718	2.53613	64.6007
gi|472586128	RHTO_06715	269	nicotinamide mononucleotide adenylyltransferase	1	81.2718	S	_RRS(ph)S(ph)LAQVAPTASPSLVPTLR_	0.636456	0.720357	0.532793	0.629869	14.9166
gi|472586128	RHTO_06715	268	nicotinamide mononucleotide adenylyltransferase	1	84.2355	S	_RRS(ph)S(ph)LAQVAPTASPSLVPTLR_	0.636456	0.720357	0.532793	0.629869	14.9166
gi|472588604	RHTO_00504	226	nitrogen assimilation transcription factor	0.996792	25.1074	S	_SEDSLPVPPKS(ph)PTAGHVVPK_	1.91633	#DIV/0!	1.07556	1.49595	39.7419
gi|472588604	RHTO_00504	228	nitrogen assimilation transcription factor	0.820098	6.5849	T	_SEDS(ph)LPVPPKSPT(ph)AGHVVPK_	0.520752	1.08218	#DIV/0!	0.801466	49.533
gi|472588604	RHTO_00504	219	nitrogen assimilation transcription factor	0.98936	19.6266	S	_SEDS(ph)LPVPPKSPT(ph)AGHVVPK_	0.520752	1.08218	#DIV/0!	0.801466	49.533
gi|472587849	RHTO_03073	208	nitrogen permease regulator 3	1	106.748	S	_ALLIPERDDS(ph)PS(ph)PR_	#DIV/0!	0.757978	4.55622	2.6571	101.079
gi|472587849	RHTO_03073	397	nitrogen permease regulator 3	0.858517	6.34176	S	_SVS(ph)PS(ph)GHAFPR_	2.98668	#DIV/0!	3.49077	3.23872	11.0057
gi|472587849	RHTO_03073	393	nitrogen permease regulator 3	0.999994	52.1004	S	_NRS(ph)VS(ph)PSGHAFPR_	2.98668	#DIV/0!	2.25159	2.61914	19.8456
gi|472587849	RHTO_03073	395	nitrogen permease regulator 3	0.996635	24.7151	S	_NRS(ph)VS(ph)PSGHAFPR_	1.53207	1.66132	1.42933	1.54091	7.54425
gi|472587849	RHTO_03073	206	nitrogen permease regulator 3	1	106.748	S	_ALLIPERDDS(ph)PS(ph)PR_	0.804635	0.748167	0.911411	0.821404	10.0929
gi|472587978	RHTO_03203	553	nitrogen permease regulator Npr2	0.978239	16.5278	S	_RGS(ph)TGAGQEGVYGER_	1.9589	1.81891	1.67129	1.81637	7.91815
gi|472585512	RHTO_07405	349	NLI interacting factor domain containing protein	0.999954	40.5759	T	_ALSPS(ph)RSPT(ph)PPPR_	1.46608	#DIV/0!	0.927128	1.1966	31.8483
gi|472583894	RHTO_01570	477	NLI interacting factor-like phosphatase	1	81.2231	S	_RES(ph)GGGGVGM(ox)VAGGASR_	#DIV/0!	2.18441	1.53827	1.86134	24.5461
gi|472582927	RHTO_02537	846	nonselective cation channel	0.798073	6.63271	S	_LDLSSS(ph)APTK_	#DIV/0!	1.32628	1.40249	1.36438	3.94955
gi|472582927	RHTO_02537	10	nonselective cation channel	0.999929	41.93	S	_TALLS(ph)PDSTVR_	4.60236	2.14206	2.52947	3.0913	42.7936
gi|472582927	RHTO_02537	833	nonselective cation channel	1	76.1021	S	_RSS(ph)VAS(ph)DYGAISR_	1.99306	0.598982	#DIV/0!	1.29602	76.0608
gi|472582927	RHTO_02537	775	nonselective cation channel	0.980797	17.0822	S	_TGDDSPAGGVSAS(ph)PPAS(ph)PR_	0.817194	1.03304	0.820143	0.890124	13.9053
gi|472582927	RHTO_02537	779	nonselective cation channel	0.999989	49.5452	S	_TGDDSPAGGVSAS(ph)PPAS(ph)PR_	0.817194	1.03304	0.820143	0.890124	13.9053
gi|472582927	RHTO_02537	830	nonselective cation channel	1	83.7333	S	_RRS(ph)S(ph)VAS(ph)DYGAISR_	0.213274	0.436053	#DIV/0!	0.324664	48.5205
gi|472582927	RHTO_02537	829	nonselective cation channel	1	88.6908	S	_RRS(ph)S(ph)VAS(ph)DYGAISR_	0.121096	0.664452	#DIV/0!	0.392774	97.8197
gi|472584525	RHTO_00865	219	nuclear distribution protein nudE homolog 1	0.935231	11.7307	S	_RRT(ph)PS(ph)PPAS(ph)PQTPTIEFVQPTPVSSR_	#DIV/0!	0.990982	1.51734	1.25416	29.6763
gi|472584525	RHTO_00865	215	nuclear distribution protein nudE homolog 1	0.981288	17.5484	S	_RRT(ph)PS(ph)PPAS(ph)PQTPTIEFVQPTPVSSR_	#DIV/0!	0.990982	1.51734	1.25416	29.6763
gi|472584525	RHTO_00865	213	nuclear distribution protein nudE homolog 1	0.99949	34.9476	T	_RRT(ph)PS(ph)PPAS(ph)PQTPTIEFVQPTPVSSR_	#DIV/0!	0.990982	1.51734	1.25416	29.6763
gi|472584525	RHTO_00865	346	nuclear distribution protein nudE homolog 1	0.999895	39.8186	S	_GS(ph)PSLGNLSAR_	0.877347	1.87382	2.2818	1.67766	43.0651
gi|472584525	RHTO_00865	441	nuclear distribution protein nudE homolog 1	0.997501	26.0113	S	_AAS(ph)PTPGVRPS(ph)SR_	0.215257	1.5022	1.71212	1.14319	70.8928
gi|472584525	RHTO_00865	450	nuclear distribution protein nudE homolog 1	0.815834	6.46878	S	_AAS(ph)PTPGVRPSS(ph)R_	0.215257	#DIV/0!	0.635203	0.42523	69.8319
gi|472585373	RHTO_07797	829	nuclear export factor	0.999988	50.136	S	_AAS(ph)PATTVAAAALAR_	#DIV/0!	0.889759	0.863632	0.876696	2.10725
gi|472585373	RHTO_07797	809	nuclear export factor	0.999999	57.9675	S	_RPS(ph)AT(ph)SPIAAK_	0.545286	0.641684	0.626723	0.604564	8.58117
gi|472584725	RHTO_01065	699	nuclear GTP-binding protein	1	81.3123	S	_AIDVVS(ph)S(ph)DEES(ph)DGGRPAKEKR_	4.64123	1.92249	1.53641	2.70004	62.6719
gi|472584725	RHTO_01065	700	nuclear GTP-binding protein	1	81.3123	S	_AIDVVS(ph)S(ph)DEES(ph)DGGRPAKEKR_	0.216774	0.0873134	#DIV/0!	0.152044	60.208
gi|472584725	RHTO_01065	704	nuclear GTP-binding protein	1	81.3123	S	_AIDVVS(ph)S(ph)DEES(ph)DGGRPAKEKR_	0.216774	0.0873134	#DIV/0!	0.152044	60.208
gi|472585682	RHTO_07575	264	nuclear mRNA splicing factor-associated protein	1	103.034	S	_QKLEDWS(ph)DEEDPNAAAAR_	2.72057	1.45214	1.26191	1.81154	43.7732
gi|472582990	RHTO_02600	486	nuclear polyadenylated RNA-binding protein Nab2	0.999683	34.882	S	_YSATFNKPANAGSS(ph)PS(ph)PAAAGVK_	#DIV/0!	1.12539	1.06055	1.09297	4.19518
gi|472582990	RHTO_02600	483	nuclear polyadenylated RNA-binding protein Nab2	0.893706	7.99553	S	_YSATFNKPANAGS(ph)SPS(ph)PAAAGVK_	2.07022	#DIV/0!	1.06055	1.56538	45.6085
gi|472582990	RHTO_02600	484	nuclear polyadenylated RNA-binding protein Nab2	0.974872	15.8866	S	_YSATFNKPANAGSS(ph)PS(ph)PAAAGVK_	2.07022	1.12539	#DIV/0!	1.59781	41.8133
gi|472587672	RHTO_02896	59	nuclear pore complex protein Nup133	0.999994	53.6594	S	_GLTVS(ph)PAPSR_	1.69414	3.76889	2.96024	2.80776	37.2449
gi|472587672	RHTO_02896	37	nuclear pore complex protein Nup133	0.999966	44.7016	S	_VASTLTSTQAT(ph)PQPS(ph)PPQTAR_	1.12208	0.747887	0.75188	0.87395	24.5893
gi|472587672	RHTO_02896	63	nuclear pore complex protein Nup133	0.999987	48.8021	S	_GLTVS(ph)PAPS(ph)RR_	0.921489	0.697204	0.917768	0.845487	15.1901
gi|472587672	RHTO_02896	33	nuclear pore complex protein Nup133	0.99903	32.585	T	_VASTLTSTQAT(ph)PQPS(ph)PPQTAR_	0.321875	1.10844	0.455622	0.628645	66.9472
gi|472581082	RHTO_05584	870	nuclear pore complex protein Nup160	1	152.374	S	_QLGS(ph)PGDDGVLER_	2.17884	0.992753	0.968523	1.38004	50.1354
gi|472581160	RHTO_05477	1173	nuclear pore complex protein Nup214	0.922892	10.7805	S	_SLFGFASS(ph)PPDEK_	1.35634	#DIV/0!	0.878349	1.11734	30.2493
gi|472581160	RHTO_05477	1172	nuclear pore complex protein Nup214	0.895583	9.33334	S	_SLFGFAS(ph)SPPDEK_	1.27419	0.929714	#DIV/0!	1.10195	22.1048
gi|472586080	RHTO_07356	633	nuclear pore complex protein Nup62	1	83.4929	S	_STAS(ph)PFAR_	0.914913	0.75392	0.750694	0.806509	11.6421
gi|472584055	RHTO_01731	481	nuclear pore complex protein Nup85	0.816018	6.57382	T	_DVGKEAEGM(ox)DVEGST(ph)PDGGEEKENVPASTSK_	#DIV/0!	1.63452	1.2695	1.45201	17.7758
gi|472580518	RHTO_06453	161	nuclear pore complex protein Nup93	0.993148	24.6223	T	_HQPAAGPSTET(ph)PR_	0.868282	0.673038	#DIV/0!	0.77066	17.9143
gi|472585602	RHTO_07495	14	nuclear pore complex protein Nup98-Nup96	0.85697	7.80657	S	_FGLLSDSEDSS(ph)DGER_	2.76335	2.02012	#DIV/0!	2.39173	21.9732
gi|472585602	RHTO_07495	128	nuclear pore complex protein Nup98-Nup96	1	79.5401	T	_QPDDDVSFDQT(ph)PPPR_	2.59471	2.29647	2.53781	2.47633	6.39401
gi|472585602	RHTO_07495	147	nuclear pore complex protein Nup98-Nup96	0.990901	17.3601	S	_ELS(ph)S(ph)TPAATAAQKK_	1.45342	0.897022	0.545732	0.965393	47.41
gi|472585602	RHTO_07495	149	nuclear pore complex protein Nup98-Nup96	0.993762	21.668	T	_ELS(ph)ST(ph)PAATAAQKK_	0.629445	0.604814	1.06595	0.766737	33.8342
gi|472585998	RHTO_07274	347	nuclear pore complex, nucleoporin 88 family protein	0.978502	16.6635	T	_ITPST(ph)PPTSAR_	0.753296	0.575209	#DIV/0!	0.664252	18.9577
gi|472581294	RHTO_05410	551	nuclear protein SNF4	0.988826	19.4835	S	_RGSEATTDAGGS(ph)ATDVR_	3.45531	1.01282	1.21774	1.89529	71.4873
gi|472587051	RHTO_04729	103	nuclear RNA export factor 1/2	0.992895	22.8965	S	_SSS(ph)VPTASKPK_	0.736974	0.78064	#DIV/0!	0.758807	4.0691
gi|472585078	RHTO_07997	35	nucleobase transmembrane transporter	1	76.7868	S	_GAATAPHLESGAEVVS(ph)AHDGVNR_	1.52198	1.24813	1.19864	1.32291	13.1649
gi|472584526	RHTO_00866	22	nucleobase transmembrane transporter	0.963679	15.2708	S	_SPSELS(ph)SDADDEKLSTSTPSAVK_	0.922254	0.0796242	1.7228	0.908226	90.4706
gi|472584526	RHTO_00866	19	nucleobase transmembrane transporter	0.818893	9.38274	S	_AVPTRSPS(ph)ELS(ph)SDADDEKLSTSTPSAVK_	0.124807	0.0796242	0.2231	0.14251	51.4755
gi|472586938	RHTO_04615	627	nucleolar 27S pre-rRNA processing, Urb2/Npa2	0.988904	19.4999	S	_ASLASSAAEEVDEES(ph)ETPRKK_	#DIV/0!	0.793525	0.723798	0.758662	6.49881
gi|472586938	RHTO_04615	642	nucleolar 27S pre-rRNA processing, Urb2/Npa2	1	82.5436	S	_RKS(ph)GAALAVDAGQVDPATR_	0.150921	0.204847	#DIV/0!	0.177884	21.4362
gi|472582685	RHTO_03599	55	nucleolar essential protein 1	1	63.5597	S	_KRPAPGS(ph)PPLNPTM(ox)VPTAPK_	0.231444	0.231594	0.183614	0.215551	12.8313
gi|472581410	RHTO_05312	598	nucleolar GTP-binding protein	0.828953	7.03297	S	_RT(ph)SSSGS(ph)IVAK_	#DIV/0!	0.0620309	0.107766	0.0848982	38.0919
gi|472581410	RHTO_05312	594	nucleolar GTP-binding protein	0.910846	10.1328	S	_RTS(ph)SSGS(ph)IVAK_	#DIV/0!	0.0864528	0.156145	0.121299	40.6268
gi|472586231	RHTO_06818	474	nucleolar protein 56	0.999999	64.0937	S	_KSEAAGEETAAAEEGS(ph)PK_	0.585001	0.396526	0.411184	0.464237	22.5834
gi|472581280	RHTO_05396	352	nucleolar protein 8	1	88.7254	S	_ERS(ph)AS(ph)PPPYVPAAPR_	0.924727	0.650745	0.638447	0.737973	21.9318
gi|472581280	RHTO_05396	354	nucleolar protein 8	1	110.925	S	_ERS(ph)AS(ph)PPPYVPAAPR_	0.924727	0.650745	0.638447	0.737973	21.9318
gi|472583330	RHTO_02220	80	nucleolus protein	0.999998	56.4975	S	_LAS(ph)PGLTDPEER_	1.26894	0.651806	0.914913	0.945219	32.7629
gi|472580801	RHTO_05826	176	nucleoporin Nup40	0.842279	7.46494	S	_DVGTPSKS(ph)PK_	1.01505	0.666756	0.654151	0.778653	26.3051
gi|472580801	RHTO_05826	150	nucleoporin Nup40	0.977972	16.4772	S	_RTS(ph)VSGSPAAR_	0.336428	0.637836	0.566572	0.513612	30.6707
gi|472587677	RHTO_02901	422	nucleoporin protein Ndc1-Nup family protein	0.850118	7.59774	S	_SSTASSGAGASTSSAPVARDEQSS(ph)PNRAPVK_	#DIV/0!	0.0789204	0.137003	0.107962	38.0419
gi|472582738	RHTO_03328	51	nucleosome binding protein (Nhp6a)	1	95.3061	T	_SVVKEENPDVT(ph)FGEIGK_	1.95553	#DIV/0!	1.54335	1.74944	16.6598
gi|472582738	RHTO_03328	119	nucleosome binding protein (Nhp6a)	1	226.078	S	_KVES(ph)EDEDDAADAVDEDDDE_	0.886997	1.16807	1.33804	1.13104	20.1401
gi|472588483	RHTO_00383	105	nucleosome remodeling complex ATPase subunit (Snf2h)	0.997864	26.6861	S	_AHVPDDVEVLHFS(ph)S(ph)PPADSK_	0.712301	#DIV/0!	1.73355	1.22293	59.0496
gi|472588483	RHTO_00383	106	nucleosome remodeling complex ATPase subunit (Snf2h)	0.997864	26.6861	S	_AHVPDDVEVLHFS(ph)S(ph)PPADSK_	0.712301	#DIV/0!	1.73355	1.22293	59.0496
gi|472581728	RHTO_04452	53	nucleotide binding protein, PINc domain protein	0.907873	9.93686	S	_QTLRPRS(ph)PADQDTPSAQPHSPGR_	#DIV/0!	1.3425	2.53537	1.93893	43.5026
gi|472584571	RHTO_00911	267	nucleotide-binding protein	0.822298	11.0245	S	_ESLGSSPPSHGAHLPTDS(ph)TSPIDEQSGGAPWR_	1.821	#DIV/0!	1.70448	1.76274	4.67404
gi|472584571	RHTO_00911	299	nucleotide-binding protein	0.982854	17.5958	T	_T(ph)ASPETPGGPGGIVAGEAPR_	0.898634	0.907441	1.41687	1.07432	27.6171
gi|472584571	RHTO_00911	301	nucleotide-binding protein	0.99991	40.4709	S	_TAS(ph)PETPGGPGGIVAGEAPR_	0.898634	1.00049	1.25186	1.05033	17.31
gi|472584571	RHTO_00911	304	nucleotide-binding protein	0.999985	47.9406	T	_TAS(ph)PET(ph)PGGPGGIVAGEAPR_	0.898634	0.994827	#DIV/0!	0.94673	7.18458
gi|472584571	RHTO_00911	187	nucleotide-binding protein	1	64.4393	S	_S(ph)IAGGSGHQR_	0.487045	#DIV/0!	1.05427	0.770659	52.0453
gi|472580320	RHTO_06678	45	nucleotide-sugar transporter	0.994872	25.9254	S	_RGDS(ph)PTTPAHGDARDS(ph)YELEQR_	#DIV/0!	2.68478	3.19765	2.94121	12.33
gi|472580320	RHTO_06678	118	nucleotide-sugar transporter	0.789657	6.61298	S	_RTGS(ph)FSAAR_	1.35643	1.34376	#DIV/0!	1.35009	0.663475
gi|472584833	RHTO_00687	184	nucleus export protein Brr6	0.836648	7.09417	S	_S(ph)GETDDEGDDAHDGAGFLGVLKK_	1.37857	0.947957	#DIV/0!	1.16326	26.1754
gi|472584833	RHTO_00687	187	nucleus export protein Brr6	0.967879	14.7903	T	_SGET(ph)DDEGDDAHDGAGFLGVLKK_	1.30868	0.939496	0.949037	1.06574	19.7466
gi|472587349	RHTO_05028	223	NUDIX hydrolase domain containing protein	1	71.8061	S	_IFLS(ph)GWDELEK_	3.48238	2.02638	1.50996	2.33957	43.7186
gi|472584103	RHTO_01356	13	oligopeptide transporter	0.999869	41.0674	S	_QDS(ph)VDATTAPELHR_	0.61282	0.0185642	#DIV/0!	0.315692	133.105
gi|472587613	RHTO_02836	200	origin recognition complex subunit 1	0.998281	30.7354	S	_AAANPFS(ph)S(ph)PAGSPSKR_	2.48355	0.703977	#DIV/0!	1.59376	78.9544
gi|472587613	RHTO_02836	199	origin recognition complex subunit 1	0.998205	30.3571	S	_AAANPFS(ph)S(ph)PAGSPSKR_	1.19366	0.703977	#DIV/0!	0.948818	36.4935
gi|472582998	RHTO_02608	218	ORMDL family protein	1	57.2927	S	_FFDAGDIGPT(ph)PDPS(ph)APPT(ph)PKDEQHLR_	1.49446	0.603136	0.886132	0.994575	45.7932
gi|472582998	RHTO_02608	222	ORMDL family protein	1	57.2927	T	_FFDAGDIGPT(ph)PDPS(ph)APPT(ph)PKDEQHLR_	0.636821	0.892937	0.700722	0.743493	17.9299
gi|472582998	RHTO_02608	214	ORMDL family protein	1	57.2927	T	_FFDAGDIGPT(ph)PDPS(ph)APPT(ph)PKDEQHLR_	0.580653	#DIV/0!	0.745212	0.662932	17.5525
gi|472580912	RHTO_05782	937	osomolarity two-component system, response regulator SSK1	0.99998	46.9261	S	_LS(ph)PSLASK_	2.96709	2.3677	1.99577	2.44352	20.0563
gi|472580912	RHTO_05782	667	osomolarity two-component system, response regulator SSK1	0.999991	50.4833	S	_TQS(ph)IAEDPSTILGR_	1.75276	1.514	1.4014	1.55605	11.5298
gi|472580912	RHTO_05782	1484	osomolarity two-component system, response regulator SSK1	0.871226	8.5154	S	_KSETPDSSVSSSALSGTPARPRS(ph)PAR_	1.53818	1.24727	1.26395	1.3498	12.102
gi|472580912	RHTO_05782	1211	osomolarity two-component system, response regulator SSK1	0.999969	45.0622	S	_ALGGSQS(ph)PLYSVSR_	0.855432	#DIV/0!	1.18802	1.02172	23.0172
gi|472582501	RHTO_03721	297	OTU domain-containing protein 3	0.986645	18.9117	S	_TASKEPDAEAEEAVDEDEPM(ox)EDESPS(ph)RPPS(ph)PLADGPPSR_	0.685307	1.06091	0.924044	0.890086	21.3562
gi|472582501	RHTO_03721	293	OTU domain-containing protein 3	0.982925	17.7449	S	_TASKEPDAEAEEAVDEDEPM(ox)EDESPS(ph)RPPS(ph)PLADGPPSR_	0.685307	1.06091	#DIV/0!	0.873107	30.4188
gi|472581911	RHTO_04154	489	oxidative-stress responsive protein 1	0.910457	10.0723	S	_RS(ph)FSFQQQQPDLR_	0.846597	1.27389	0.846238	0.988907	24.9567
gi|472586837	RHTO_06360	726	oxysterol-binding protein	0.980595	17.138	S	_GTTITSLS(ph)PSR_	3.11003	2.70548	2.37722	2.73091	13.4413
gi|472586837	RHTO_06360	236	oxysterol-binding protein	0.831051	6.93233	T	_RT(ph)SLTM(ox)DSPR_	1.50702	0.926183	0.650195	1.0278	42.5529
gi|472585030	RHTO_07949	337	oxysterol-binding protein	0.999994	52.1173	S	_AGS(ph)PVYASR_	1.43606	#DIV/0!	2.01939	1.72772	23.8739
gi|472586837	RHTO_06360	674	oxysterol-binding protein	0.999917	40.8212	S	_ANLGAITPAM(ox)S(ph)PR_	1.2106	1.64598	0.8726	1.24306	31.1901
gi|472587559	RHTO_02782	311	Pab1 binding protein	0.867735	8.32932	S	_LPQPTS(ph)ATSR_	#DIV/0!	0.558098	0.899604	0.728851	33.1318
gi|472587559	RHTO_02782	476	Pab1 binding protein	0.902215	13.0097	T	_TLPAPTPS(ph)PT(ph)PSSASVPPQAAAQK_	#DIV/0!	2.11184	2.05229	2.08207	2.02245
gi|472587559	RHTO_02782	472	Pab1 binding protein	0.968557	15.878	T	_TLPAPT(ph)PSPTPSS(ph)ASVPPQAAAQK_	#DIV/0!	2.02827	1.97926	2.00377	1.72975
gi|472587559	RHTO_02782	456	Pab1 binding protein	0.999801	40.1167	S	_KPGSSVASNAS(ph)PAVS(ph)PANTTR_	4.56663	0.712301	0.546359	1.94176	117.147
gi|472587559	RHTO_02782	453	Pab1 binding protein	0.976883	13.3862	S	_KPGS(ph)SVAS(ph)NAS(ph)PAVS(ph)PANTTR_	0.922254	0.606244	0.864902	0.7978	21.1021
gi|472587559	RHTO_02782	460	Pab1 binding protein	1	71.0843	S	_KPGSSVASNAS(ph)PAVS(ph)PANTTR_	0.662339	2.10433	1.83608	1.53425	49.9864
gi|472587559	RHTO_02782	450	Pab1 binding protein	0.888073	7.73434	S	_KPGS(ph)S(ph)VASNAS(ph)PAVS(ph)PANTTR_	0.485366	0.658068	0.500125	0.547853	17.4743
gi|472587559	RHTO_02782	449	Pab1 binding protein	0.910678	8.3884	S	_KPGS(ph)S(ph)VASNAS(ph)PAVS(ph)PANTTR_	0.485366	0.901063	1.58935	0.991925	56.2109
gi|472582530	RHTO_03750	121	PAB-dependent poly(A)-specific ribonuclease subunit 3	0.999996	53.8893	S	_RAVT(ph)PALS(ph)EDAPFFTPAGQQQAPSAPGSVADSSYGR_	#DIV/0!	0.493462	0.715461	0.604461	25.9698
gi|472582530	RHTO_03750	117	PAB-dependent poly(A)-specific ribonuclease subunit 3	0.999998	57.9586	T	_RAVT(ph)PALS(ph)EDAPFFTPAGQQQAPSAPGSVADSSYGR_	0.31999	0.493462	0.715461	0.509638	38.8965
gi|472588276	RHTO_00176	978	paired amphipathic helix protein Sin3a	0.973532	14.5262	S	_TAAVPVPTANS(ph)APSS(ph)R_	#DIV/0!	1.33795	1.32382	1.33089	0.75096
gi|472588276	RHTO_00176	975	paired amphipathic helix protein Sin3a	0.978185	16.4181	T	_TAAVPVPT(ph)ANS(ph)APSSR_	#DIV/0!	1.33795	1.32294	1.33045	0.797747
gi|472588276	RHTO_00176	380	paired amphipathic helix protein Sin3a	1	67.928	S	_KAVAADVS(ph)PLVGGPAGR_	2.60838	1.43604	1.15635	1.73359	44.4389
gi|472588572	RHTO_00472	510	paired amphipathic helix protein Sin3a	0.876122	10.9946	S	_M(ox)AHLQQQQQQQAASIES(ph)PPLGHGPSVPVAK_	1.96699	#DIV/0!	1.15755	1.56227	36.6363
gi|472588572	RHTO_00472	242	paired amphipathic helix protein Sin3a	1	107.025	S	_AIS(ph)PPAPIPPFGGNR_	1.73322	1.53261	1.34185	1.5359	12.7422
gi|472586981	RHTO_04659	404	Pal1 cell morphology family protein	1	177.298	S	_EAAQAHS(ph)VPVS(ph)PLEER_	2.09113	1.37146	1.0646	1.50906	34.9169
gi|472586981	RHTO_04659	155	Pal1 cell morphology family protein	0.991374	20.6099	S	_SRS(ph)NTDLDLIDR_	1.29621	#DIV/0!	1.28813	1.29217	0.442227
gi|472586981	RHTO_04659	229	Pal1 cell morphology family protein	0.999917	40.8079	S	_KVS(ph)NGLSER_	0.931272	#DIV/0!	0.971157	0.951214	2.96491
gi|472586981	RHTO_04659	82	Pal1 cell morphology family protein	0.800745	6.04085	S	_SGTVDDILGAYGDS(ph)PTK_	0.637267	0.374602	1.38255	0.798141	65.512
gi|472586981	RHTO_04659	408	Pal1 cell morphology family protein	1	177.298	S	_EAAQAHS(ph)VPVS(ph)PLEER_	0.526815	0.764351	1.43957	0.910246	52.024
gi|472582019	RHTO_04013	777	PAP/25A associated domain family	1	95.9538	S	_AKDEPERS(ph)DEEPFVFR_	1.42621	0.893336	0.986193	1.10191	25.8333
gi|472582019	RHTO_04013	194	PAP/25A associated domain family	0.98731	19.3489	S	_SSS(ph)KERPAPAAK_	1.18776	0.702149	0.976181	0.955364	25.485
gi|472581668	RHTO_04392	392	parasitic phase-specific protein psp-1	0.984764	24.9689	S	_ETDGDEGVVTDGSPTTM(ox)VERGS(ph)LRS(ph)R_	1.96641	1.14367	#DIV/0!	1.55504	37.4118
gi|472582581	RHTO_03495	328	pentatricopeptide repeat protein	0.973304	12.693	S	_S(ph)NSS(ph)PTSDRPSLSR_	0.798085	0.263359	#DIV/0!	0.530722	71.2441
gi|472582581	RHTO_03495	327	pentatricopeptide repeat protein	0.941232	13.3634	S	_SNS(ph)SPTSDRPSLSR_	0.798085	0.18742	#DIV/0!	0.492752	87.6312
gi|472582581	RHTO_03495	132	pentatricopeptide repeat protein	0.804861	6.15376	S	_ALAS(ph)SPARR_	0.646078	0.215132	0.290023	0.383745	60.0016
gi|472582581	RHTO_03495	361	pentatricopeptide repeat protein	0.99977	36.3746	S	_APSDGDSQWQPTFAPAS(ph)PR_	0.271393	0.355758	0.44837	0.358507	24.6915
gi|472582581	RHTO_03495	162	pentatricopeptide repeat protein	0.934648	12.8843	S	_HGS(ph)LSSGSAPHPDLLR_	0.182262	0.47288	0.253955	0.303033	49.9607
gi|472582581	RHTO_03495	261	pentatricopeptide repeat protein	0.999971	48.0672	S	_RPS(ph)T(ph)PLSSATR_	0.176087	0.222104	0.295989	0.231393	26.1409
gi|472582581	RHTO_03495	262	pentatricopeptide repeat protein	0.999391	33.9454	T	_RPS(ph)T(ph)PLSSATR_	0.176087	0.222104	#DIV/0!	0.199096	16.3432
gi|472585219	RHTO_08138	453	peptide chain release factor eRF subunit 1	0.995463	23.4125	S	_YKVDFAEIADALEQADEDEFYDS(ph)DEDFI_	0.603136	#DIV/0!	0.455622	0.529379	19.7038
gi|472588299	RHTO_00199	81	peptide-methionine (S)-S-oxide reductase	0.999602	34.4337	S	_VGYTGGHADS(ph)PNYR_	2.12359	1.62322	0.897022	1.54794	39.8425
gi|472581841	RHTO_04331	268	Peptidyl-prolyl cis-trans isomerase, cyclophilin-type	0.998618	28.5915	S	_KEDS(ph)PELSAEQIAALEAQNREEETAAK_	3.36939	1.8441	2.1439	2.45246	32.9507
gi|472581841	RHTO_04331	261	Peptidyl-prolyl cis-trans isomerase, cyclophilin-type	0.999999	59.4835	S	_S(ph)AS(ph)PARKEDS(ph)PELSAEQIAALEAQNR_	2.42236	1.8441	2.12071	2.12906	13.5845
gi|472581841	RHTO_04331	259	Peptidyl-prolyl cis-trans isomerase, cyclophilin-type	1	66.128	S	_S(ph)AS(ph)PARKEDS(ph)PELSAEQIAALEAQNR_	2.42236	1.8441	2.12071	2.12906	13.5845
gi|472585826	RHTO_07102	187	peptidyl-prolyl cis-trans isomerase-like 4	0.989285	19.6532	S	_HVIVLDDPFDDPEGLDVPPNS(ph)PVPTAK_	2.32083	1.1211	#DIV/0!	1.72097	49.2942
gi|472580338	RHTO_06642	210	peptidylprolyl isomerase	0.999859	38.5	S	_KRPADETPAGADDS(ph)T(ph)VS(ph)AASVAGLSK_	4.67421	1.22411	0.82905	2.24246	94.3253
gi|472580338	RHTO_06642	211	peptidylprolyl isomerase	0.999425	32.6435	T	_KRPADETPAGADDS(ph)T(ph)VS(ph)AASVAGLSK_	2.85763	0.302874	0.631114	1.26387	109.976
gi|472580338	RHTO_06642	58	peptidylprolyl isomerase	1	78.1957	S	_SAVTM(ox)KYPEFEQDS(ph)DDEEDDEEEEDEDEDDENIKLPK_	1.92256	1.69437	1.08852	1.56848	27.4811
gi|472580338	RHTO_06642	51	peptidylprolyl isomerase	0.891478	9.14592	Y	_Y(ph)PEFEQDSDDEEDDEEEEDEDEDDENIKLPK_	1.61288	2.07288	1.11224	1.59933	30.0417
gi|472580338	RHTO_06642	213	peptidylprolyl isomerase	0.998432	28.2175	S	_KRPADETPAGADDS(ph)T(ph)VS(ph)AASVAGLSK_	0.46013	0.351902	0.421621	0.411217	13.3406
gi|472580338	RHTO_06642	216	peptidylprolyl isomerase	0.99772	29.2192	S	_KRPADETPAGADDSTVS(ph)AAS(ph)VAGLSK_	0.232191	0.587441	0.385431	0.401687	44.3583
gi|472585667	RHTO_07560	4	peptidyl-prolyl isomerase domain and WD repeat-containing protein 1	1	91.8032	S	_AVS(ph)PAAESGLLEGSDSLKR_	1.51547	1.04767	0.830565	1.13124	30.9412
gi|472584946	RHTO_00800	675	periodic tryptophan protein 2	1	94.532	S	_GDLS(ph)DLEDRLDK_	1.26084	2.34439	1.91953	1.84159	29.6463
gi|472584946	RHTO_00800	241	periodic tryptophan protein 2	1	67.4187	S	_KADEEADS(ph)DDEDEEM(ox)AVGLAPQASTSTGPDNAIALTR_	0.282151	0.182013	0.523862	0.329342	53.3616
gi|472583455	RHTO_01958	995	peroxin-1	0.999931	41.9759	S	_KAAATSAS(ph)PASR_	2.25718	2.10637	1.74804	2.0372	12.8376
gi|472587438	RHTO_05117	212	peroxiredoxin (alkyl hydroperoxide reductase subunit C)	0.843329	7.31009	T	_EKPVT(ph)GVSPDAKR_	#DIV/0!	0.626017	0.664099	0.645058	4.17446
gi|472587438	RHTO_05117	215	peroxiredoxin (alkyl hydroperoxide reductase subunit C)	1	71.9915	S	_EKPVTGVS(ph)PDAK_	1.26841	0.847458	0.788271	0.968045	27.0441
gi|472588017	RHTO_03242	838	PH domain containing protein	0.922284	10.7435	S	_SPPPM(ox)VLEEVEEAPS(ph)RGSLDERER_	#DIV/0!	1.17217	1.52105	1.34661	18.3199
gi|472588017	RHTO_03242	841	PH domain containing protein	0.817294	6.50625	S	_SPPPM(ox)VLEEVEEAPSRGS(ph)LDER_	4.87045	#DIV/0!	2.91698	3.89371	35.4753
gi|472583858	RHTO_01534	27	PH domain containing protein	0.935059	12.61	T	_RS(ph)SVT(ph)SRQS(ph)QLIK_	0.890472	1.22901	0.72197	0.947152	27.2639
gi|472583858	RHTO_01534	31	PH domain containing protein	0.998221	28.0577	S	_RSS(ph)VTSRQS(ph)QLIK_	0.890472	1.22901	0.666311	0.928599	30.5064
gi|472583858	RHTO_01534	25	PH domain containing protein	0.978562	17.8579	S	_SVATGHTGVS(ph)RRSS(ph)VTSR_	0.881834	0.907606	0.535275	0.774905	26.8324
gi|472583858	RHTO_01534	24	PH domain containing protein	0.995633	23.7146	S	_RS(ph)SVT(ph)SRQS(ph)QLIK_	0.768817	1.22901	0.960892	0.986241	23.4368
gi|472583858	RHTO_01534	12	PH domain containing protein	0.999979	46.683	S	_S(ph)VATGHTGVSR_	0.728279	1.14859	0.685072	0.853982	29.9836
gi|472584887	RHTO_00741	288	PH domain containing protein	1	69.4507	S	_RGS(ph)LALAK_	0.241406	#DIV/0!	0.338261	0.289833	23.6297
gi|472583289	RHTO_02316	1306	PHD finger and BAH domain protein (Snt2)	0.861339	7.93359	T	_DTTAFS(ph)DDPALQQLAQT(ph)SPRPR_	2.34896	#DIV/0!	1.25422	1.80159	42.9677
gi|472583289	RHTO_02316	572	PHD finger and BAH domain protein (Snt2)	1	70.4517	S	_DVFEELEERDDEADDQAS(ph)IAPPPK_	1.03102	0.643294	0.789702	0.82134	23.8381
gi|472586490	RHTO_06013	42	PHD finger protein 8	0.994129	23.8265	S	_TAVANS(ph)PYASK_	1.13227	0.197769	1.12366	0.8179	65.6641
gi|472586490	RHTO_06013	713	PHD finger protein 8	1	94.7073	S	_KAES(ph)LEPDAQAALAAK_	0.533049	#DIV/0!	1.83587	1.18446	77.7768
gi|472581744	RHTO_04468	153	phosducin-like 2	1	132.587	S	_RGS(ph)DALGNR_	0.517813	0.838364	0.929627	0.761934	28.3862
gi|472583886	RHTO_01562	254	phosphatase 2a inhibitor i2pp2a	1	113.395	S	_EIDLS(ph)DEEKRPK_	6.78979	7.3654	3.71885	5.95801	32.9037
gi|472582218	RHTO_03958	354	phosphate system cyclin PHO80	0.987588	19.0072	S	_STSYSIASS(ph)PQR_	0.97078	0.26651	0.576635	0.604642	58.3766
gi|472583882	RHTO_01558	298	phosphate transporter	0.797298	6.05636	S	_ALSS(ph)AS(ph)ETGDLIGLHDGDDDDADQQEPVTPSRR_	0.997009	0.735727	#DIV/0!	0.866368	21.3252
gi|472583882	RHTO_01558	300	phosphate transporter	0.964545	11.1746	S	_ALS(ph)SAS(ph)ET(ph)GDLIGLHDGDDDDADQQEPVTPSRR_	0.858148	0.85317	#DIV/0!	0.855659	0.411425
gi|472583882	RHTO_01558	302	phosphate transporter	0.964545	11.1746	T	_ALS(ph)SAS(ph)ET(ph)GDLIGLHDGDDDDADQQEPVTPSRR_	0.677231	0.787154	1.02727	0.830553	21.5533
gi|472584042	RHTO_01718	205	phosphatidate cytidylyltransferase	0.999907	40.317	S	_AVS(ph)PTPAAPAEGDKPK_	3.46584	3.00309	2.40778	2.95891	17.926
gi|472584042	RHTO_01718	31	phosphatidate cytidylyltransferase	0.999999	66.934	S	_FDALAFDAGES(ph)S(ph)GDEELPPPATLSPPVPTTPSKK_	1.96831	1.40201	1.37174	1.58069	21.2585
gi|472584042	RHTO_01718	30	phosphatidate cytidylyltransferase	0.999999	69.702	S	_FDALAFDAGES(ph)S(ph)GDEELPPPATLSPPVPTTPSKK_	1.96831	1.40201	1.37174	1.58069	21.2585
gi|472584042	RHTO_01718	8	phosphatidate cytidylyltransferase	0.990062	20.3737	S	_SAS(ph)VTRPDVASK_	1.1544	0.704821	0.997108	0.95211	23.9618
gi|472583911	RHTO_01587	29	phosphatidylserine decarboxylase	0.999729	37.2827	S	_AQPPLAAGDTDATSPPS(ph)PAPS(ph)PGLRR_	#DIV/0!	0.66024	1.10383	0.882033	35.5613
gi|472583911	RHTO_01587	33	phosphatidylserine decarboxylase	1	66.9313	S	_AQPPLAAGDTDATSPPS(ph)PAPS(ph)PGLRR_	#DIV/0!	0.66024	1.51231	1.08628	55.4652
gi|472583911	RHTO_01587	374	phosphatidylserine decarboxylase	0.997556	26.113	S	_STSPEHAVTES(ph)PPPIPDIR_	4.36395	3.63702	3.08928	3.69675	17.2971
gi|472583911	RHTO_01587	855	phosphatidylserine decarboxylase	0.815303	6.29251	S	_GTVKPPS(ph)S(ph)PSRVDSADLGATDEGDIER_	3.77886	0.932401	#DIV/0!	2.35563	85.4443
gi|472583911	RHTO_01587	861	phosphatidylserine decarboxylase	0.808969	6.60808	S	_GTVKPPSS(ph)PSRVDS(ph)ADLGATDEGDIER_	3.52933	#DIV/0!	2.13863	2.83398	34.6995
gi|472581166	RHTO_05483	21	phosphoesterase, RecJ-like	0.837824	7.42955	S	_RS(ph)PSPALDSTTVPQDAAGK_	2.71843	1.75067	1.72007	2.06306	27.5209
gi|472581166	RHTO_05483	23	phosphoesterase, RecJ-like	0.922123	10.0874	S	_S(ph)TRRSPS(ph)PALDSTTVPQDAAGK_	2.71843	3.5917	1.92771	2.74594	30.3114
gi|472585396	RHTO_07820	21	phosphoglucomutase	0.948927	12.6904	T	_AFQDQRPGT(ph)SGLR_	2.13712	1.70288	#DIV/0!	1.92	15.9923
gi|472585396	RHTO_07820	117	phosphoglucomutase	0.984841	19.2002	S	_KATGGILLTAS(ph)HNPGGPNADFGIK_	0.871916	#DIV/0!	0.921404	0.89666	3.90268
gi|472585396	RHTO_07820	109	phosphoglucomutase	0.954703	14.0564	T	_KAT(ph)GGILLTASHNPGGPNADFGIK_	0.849473	#DIV/0!	0.725584	0.787529	11.1238
gi|472585396	RHTO_07820	115	phosphoglucomutase	0.954098	13.3226	T	_ATGGILLT(ph)ASHNPGGPNADFGIK_	0.69979	0.614175	0.768758	0.694241	11.1547
gi|472580899	RHTO_05769	831	phospholipase D	1	93.9488	S	_KGLNFLHANGT(ph)NDS(ph)LDDVDPELR_	1.47154	1.64276	1.07498	1.39643	20.8567
gi|472580899	RHTO_05769	828	phospholipase D	1	93.9488	T	_KGLNFLHANGT(ph)NDS(ph)LDDVDPELR_	1.47154	1.64276	1.07498	1.39643	20.8567
gi|472580899	RHTO_05769	407	phospholipase D	0.999996	54.3537	S	_ARS(ph)AGEAEGPSSGVQTPSGEAGGHSR_	1.32459	1.49274	1.32834	1.38189	6.94817
gi|472583442	RHTO_01945	35	phospholipid:diacylglycerol acyltransferase	0.999763	42.7991	S	_NASAPANQLDTDDSSPAPS(ph)RPDS(ph)PDVDKAPVR_	2.74876	1.24989	1.88555	1.9614	38.3557
gi|472583442	RHTO_01945	31	phospholipid:diacylglycerol acyltransferase	0.999683	39.1569	S	_NASAPANQLDTDDSSPAPS(ph)RPDS(ph)PDVDKAPVR_	1.12532	1.02054	#DIV/0!	1.07293	6.9049
gi|472584182	RHTO_01435	422	phospholipid-translocating ATPase	0.779124	8.03352	S	_RSS(ph)SDVVSYEHATPGTAK_	#DIV/0!	1.95229	1.95339	1.95284	0.0400451
gi|472582401	RHTO_03620	28	phospholipid-translocating ATPase	0.989548	19.7396	S	_TTLGTDEDVQS(ph)DADS(ph)FSERR_	1.86954	#DIV/0!	1.51	1.68977	15.0454
gi|472582401	RHTO_03620	30	phospholipid-translocating ATPase	0.874671	8.43999	S	_TTLGTDEDVQSDADSFS(ph)ERR_	0.884017	1.00303	#DIV/0!	0.943523	8.91916
gi|472587826	RHTO_03050	327	phospholipid-translocating ATPase	0.999584	35.1452	S	_ANTSAGLS(ph)YEAPIPAR_	0.71541	0.4592	0.619963	0.598191	21.6461
gi|472587826	RHTO_03050	322	phospholipid-translocating ATPase	0.984047	17.9018	T	_ANT(ph)SAGLSYEAPIPAR_	0.477806	#DIV/0!	0.805088	0.641447	36.0783
gi|472582401	RHTO_03620	24	phospholipid-translocating ATPase	0.999638	34.2628	S	_TTLGTDEDVQS(ph)DADS(ph)FSERR_	0.240362	#DIV/0!	0.800064	0.520213	76.0784
gi|472581940	RHTO_04183	355	phosphotyrosyl phosphatase activator	1	148.406	S	_LPS(ph)PART(ph)PPR_	#DIV/0!	15.6199	1.1436	8.38174	122.126
gi|472581940	RHTO_04183	373	phosphotyrosyl phosphatase activator	0.999165	31.868	S	_RDS(ph)PPSPSSR_	3.50435	#DIV/0!	0.606722	2.05553	99.6787
gi|472581940	RHTO_04183	359	phosphotyrosyl phosphatase activator	1	148.406	T	_LPS(ph)PART(ph)PPR_	2.51566	15.6199	1.04927	6.39494	125.452
gi|472582150	RHTO_03889	25	Phox homologous domain containing protein	0.973855	16.3021	S	_SSS(ph)LLIPVDDSKPTR_	1.155	1.57537	#DIV/0!	1.36519	21.7734
gi|472587327	RHTO_05006	403	Pinin/SDK/MemA protein domain containing protein	0.958256	13.4592	S	_S(ph)T(ph)SPGAAAVSASASASK_	5.81971	5.91331	1.27361	4.33554	61.1717
gi|472587327	RHTO_05006	404	Pinin/SDK/MemA protein domain containing protein	0.96755	14.5531	T	_S(ph)T(ph)SPGAAAVSASASASK_	5.81971	2.50796	3.74308	4.02358	41.5947
gi|472587327	RHTO_05006	405	Pinin/SDK/MemA protein domain containing protein	0.966812	13.9264	S	_ST(ph)S(ph)PGAAAVSASASASK_	1.4325	0.983091	3.74308	2.05289	72.137
gi|472583776	RHTO_01866	988	plasma membrane H+-transporting ATPase	1	87.7311	S	_FGS(ph)HQAS(ph)ASGAALRA_	0.377074	0.361585	0.632511	0.457057	33.288
gi|472583776	RHTO_01866	950	plasma membrane H+-transporting ATPase	0.974159	15.7633	S	_TQS(ph)RHES(ph)LYSNR_	0.204541	#DIV/0!	0.494658	0.349599	58.6797
gi|472583776	RHTO_01866	954	plasma membrane H+-transporting ATPase	0.999995	56.9109	S	_TQS(ph)RHES(ph)LYSNR_	0.204541	#DIV/0!	0.494658	0.349599	58.6797
gi|472583776	RHTO_01866	992	plasma membrane H+-transporting ATPase	0.999863	38.642	S	_FGS(ph)HQAS(ph)ASGAALRA_	0.199068	#DIV/0!	1.14757	0.673317	99.6097
gi|472583776	RHTO_01866	994	plasma membrane H+-transporting ATPase	0.999891	39.6089	S	_FGS(ph)HQASAS(ph)GAALRA_	0.120228	#DIV/0!	0.337838	0.229033	67.1838
gi|472582364	RHTO_03854	138	pleckstrin homology domain containing protein	0.904444	9.74433	S	_TS(ph)RDS(ph)AGLSDNVALK_	6.15915	1.85856	1.75479	3.2575	77.1585
gi|472582364	RHTO_03854	141	pleckstrin homology domain containing protein	0.999631	31.9688	S	_TS(ph)RDS(ph)AGLSDNVALK_	4.25478	2.81041	2.93135	3.33218	24.0467
gi|472584163	RHTO_01416	199	poly(A)+ mRNA-nucleus export-related protein	0.999988	49.0761	S	_SKS(ph)LS(ph)PGLAR_	2.38112	2.37654	1.94955	2.23574	11.0862
gi|472584163	RHTO_01416	8	poly(A)+ mRNA-nucleus export-related protein	1	66.3447	T	_FGLLQT(ph)DS(ph)S(ph)S(ph)EDDDNVPKVPLKPTNR_	1.93442	#DIV/0!	1.23054	1.58248	31.4518
gi|472584163	RHTO_01416	10	poly(A)+ mRNA-nucleus export-related protein	0.99998	46.9201	S	_FGLLQT(ph)DS(ph)S(ph)S(ph)EDDDNVPKVPLKPTNR_	1.71798	#DIV/0!	1.23054	1.47426	23.3791
gi|472584163	RHTO_01416	11	poly(A)+ mRNA-nucleus export-related protein	0.999993	51.5322	S	_FGLLQT(ph)DS(ph)S(ph)S(ph)EDDDNVPKVPLKPTNR_	1.71798	#DIV/0!	0.953107	1.33554	40.4963
gi|472584163	RHTO_01416	12	poly(A)+ mRNA-nucleus export-related protein	0.999993	51.5322	S	_FGLLQT(ph)DS(ph)S(ph)S(ph)EDDDNVPKVPLKPTNR_	1.71798	#DIV/0!	0.953107	1.33554	40.4963
gi|472584163	RHTO_01416	201	poly(A)+ mRNA-nucleus export-related protein	1	74.1068	S	_SKS(ph)LS(ph)PGLAR_	1.06296	2.37654	1.08155	1.50702	49.9721
gi|472584163	RHTO_01416	39	poly(A)+ mRNA-nucleus export-related protein	0.999231	31.1396	S	_RAGS(ph)AGPSAASSAPR_	0.674354	0.319448	0.407598	0.467133	39.5587
gi|472582531	RHTO_03751	965	poly(U) polymerase CID1	0.999766	36.3774	S	_AEDTDDIDWEDDS(ph)DDDLRRS(ph)PVIAASEGK_	2.64452	2.4728	1.65044	2.25592	23.5534
gi|472582531	RHTO_03751	958	poly(U) polymerase CID1	1	68.6861	S	_AEDTDDIDWEDDS(ph)DDDLRRS(ph)PVIAASEGK_	2.1724	2.4728	1.65044	2.09855	19.8292
gi|472582531	RHTO_03751	920	poly(U) polymerase CID1	1	88.0565	S	_GGS(ph)VPHVR_	1.4529	#DIV/0!	1.30327	1.37808	7.67743
gi|472581573	RHTO_04493	590	polypeptide N-acetylglucosaminyltransferase, glycosyltransferase family 41 protein	1	96.9927	S	_RGS(ph)AGM(ox)EELGK_	1.05996	1.15622	0.602555	0.939578	31.4835
gi|472587093	RHTO_04771	345	potassium ion transporter	0.999223	31.0955	S	_RNS(ph)DSVAATPTR_	2.20158	1.97589	1.4721	1.88319	19.8316
gi|472581993	RHTO_04236	715	potential regulator of cell polarity	1	78.3416	S	_APS(ph)PPPEPR_	2.96639	2.61424	1.68699	2.42254	27.2808
gi|472581993	RHTO_04236	278	potential regulator of cell polarity	0.9902	20.6613	S	_RSS(ph)LSAGGNR_	0.124312	#DIV/0!	0.243256	0.183784	45.7637
gi|472581993	RHTO_04236	432	potential regulator of cell polarity	0.999821	37.4771	S	_KGS(ph)IGSEVGR_	0.0954836	0.26796	#DIV/0!	0.181722	67.1131
gi|472580872	RHTO_05742	1735	Prefoldin domain protein	0.958338	13.6774	S	_AGPLSPS(ph)REQPGLGSALS(ph)PR_	3.60036	2.49894	2.24638	2.78189	25.8807
gi|472580872	RHTO_05742	1598	Prefoldin domain protein	0.999941	42.3249	S	_SLPSLGS(ph)PPR_	3.02654	2.22045	1.95561	2.40087	23.2332
gi|472580872	RHTO_05742	1722	Prefoldin domain protein	0.987552	18.9949	S	_AGPLS(ph)PSREQPGLGSALSPR_	2.26239	2.32959	4.35407	2.98202	39.8626
gi|472580872	RHTO_05742	1732	Prefoldin domain protein	0.876617	8.54242	S	_AGPLS(ph)PSREQPGLGS(ph)ALSPR_	2.26239	#DIV/0!	1.68067	1.97153	20.8639
gi|472580648	RHTO_05963	657	pre-mRNA cleavage complex 2 protein Pcf11	0.990182	20.0368	S	_KADS(ph)VGPSPVKQEHDAGAGVGEFAR_	1.08469	#DIV/0!	0.986582	1.03564	6.69872
gi|472581867	RHTO_04357	608	pre-mrna splicing factor 24	1	77.4138	S	_IQS(ph)PAQEVKEPTR_	2.50532	1.56602	1.51044	1.86059	30.0465
gi|472588554	RHTO_00454	374	pre-mRNA splicing factor CWC2	0.992964	24.1337	S	_KPAAAVGGLSSLAAYGS(ph)DDESD_	#DIV/0!	1.60937	1.12827	1.36882	24.8526
gi|472588554	RHTO_00454	378	pre-mRNA splicing factor CWC2	0.999941	42.3015	S	_KPAAAVGGLSSLAAYGS(ph)DDES(ph)D_	#DIV/0!	0.692857	1.59005	1.14145	55.5794
gi|472583421	RHTO_02267	281	pre-mrna-processing ATP-dependent RNA helicase DDX46/PRP5	0.999994	49.9158	S	_AAPAS(ph)PAPT(ph)SPVPVK_	0.924984	0.976467	0.861326	0.920926	6.26299
gi|472582029	RHTO_04023	8	pre-mRNA-processing factor 17	1	72.7103	S	_ALVDYGS(ph)DS(ph)EGEQAQQHPHK_	3.61939	2.32786	1.26896	2.4054	48.9371
gi|472582029	RHTO_04023	10	pre-mRNA-processing factor 17	1	94.2403	S	_ALVDYGS(ph)DS(ph)EGEQAQQHPHK_	1.62419	1.0011	#DIV/0!	1.31265	33.5652
gi|472581936	RHTO_04179	193	pre-mRNA-processing factor 19	1	76.2862	S	_RKPS(ph)PECATPDDVK_	2.14261	1.57337	1.12336	1.61311	31.6649
gi|472581936	RHTO_04179	198	pre-mRNA-processing factor 19	0.94739	12.5546	T	_RKPSPECAT(ph)PDDVK_	1.53179	1.09412	#DIV/0!	1.31295	23.5716
gi|472582162	RHTO_03901	226	pre-mRNA-processing protein 45	1	74.4602	S	_GPPS(ph)PPPPVLRS(ph)PPR_	3.12832	2.0765	1.12505	2.10996	47.4918
gi|472582162	RHTO_03901	394	pre-mRNA-processing protein 45	0.996764	28.5639	S	_AASTVDGGS(ph)DEEDVARDEGETEEDRR_	2.67101	1.27484	0.822233	1.58936	60.6334
gi|472582162	RHTO_03901	234	pre-mRNA-processing protein 45	1	74.4602	S	_GPPS(ph)PPPPVLRS(ph)PPR_	1.59556	0.903098	0.75643	1.08503	41.3051
gi|472580584	RHTO_06416	17	pre-mRNA-splicing factor 18	0.766675	5.66697	S	_QLES(ph)LSPSPS(ph)PHPTDSAASTSTEPPKK_	#DIV/0!	3.01696	2.58799	2.80247	10.8234
gi|472580584	RHTO_06416	21	pre-mRNA-splicing factor 18	0.989823	20.3421	S	_QLESLS(ph)PS(ph)PS(ph)PHPTDSAASTSTEPPKK_	3.2619	1.55579	2.61247	2.47672	34.7684
gi|472580584	RHTO_06416	23	pre-mRNA-splicing factor 18	0.995855	25.4071	S	_QLESLS(ph)PS(ph)PS(ph)PHPTDSAASTSTEPPKK_	3.2619	3.01696	2.56148	2.94678	12.0622
gi|472580584	RHTO_06416	19	pre-mRNA-splicing factor 18	0.974343	17.0353	S	_QLESLS(ph)PS(ph)PSPHPTDSAASTSTEPPKK_	2.82119	2.36451	2.61247	2.59939	8.79515
gi|472580584	RHTO_06416	98	pre-mRNA-splicing factor 18	0.989139	19.6148	S	_RARS(ph)TSAT(ph)PDPASLS(ph)TK_	2.25698	1.51426	1.37329	1.71484	27.6858
gi|472580584	RHTO_06416	99	pre-mRNA-splicing factor 18	0.95206	13.3707	T	_ARST(ph)S(ph)ATPDPASLSTK_	1.92715	1.66845	1.59106	1.72889	10.1804
gi|472580584	RHTO_06416	102	pre-mRNA-splicing factor 18	0.999988	50.7734	T	_ARS(ph)TS(ph)AT(ph)PDPASLSTK_	0.547855	1.01596	0.501882	0.688566	41.3123
gi|472580584	RHTO_06416	100	pre-mRNA-splicing factor 18	0.999186	32.7001	S	_ARS(ph)TS(ph)ATPDPASLSTK_	0.484074	0.6943	0.508001	0.562125	20.4741
gi|472588331	RHTO_00231	302	pre-mRNA-splicing factor 38A	0.99343	21.3181	S	_YVS(ph)RS(ph)PTRS(ph)PEPETIEVEHIDGDV_	1.85818	2.6246	#DIV/0!	2.24139	24.1787
gi|472586734	RHTO_06257	669	pre-mRNA-splicing factor CDC5/CEF1	1	87.3455	S	_TVALS(ph)PEEFDK_	1.3574	#DIV/0!	0.977326	1.16737	23.0225
gi|472585160	RHTO_08079	172	pre-mRNA-splicing factor CWC25	0.999807	37.1812	T	_ENSNVTIWPPS(ph)PRT(ph)PEPEDDGTK_	#DIV/0!	2.42172	2.07961	2.25066	10.7483
gi|472585160	RHTO_08079	169	pre-mRNA-splicing factor CWC25	0.999999	60.3537	S	_ENSNVTIWPPS(ph)PRT(ph)PEPEDDGTK_	#DIV/0!	2.42172	2.07961	2.25066	10.7483
gi|472585160	RHTO_08079	272	pre-mRNA-splicing factor CWC25	0.950531	15.9213	S	_SSKRS(ph)LSPVS(ph)DEDDAPSSK_	2.02368	#DIV/0!	1.32284	1.67326	29.6169
gi|472585160	RHTO_08079	277	pre-mRNA-splicing factor CWC25	0.984382	18.6962	S	_SSKRS(ph)LS(ph)PVS(ph)DEDDAPSSK_	2.02368	#DIV/0!	1.32284	1.67326	29.6169
gi|472585160	RHTO_08079	58	pre-mRNA-splicing factor CWC25	0.999998	57.4566	S	_AS(ph)PAYGEYNDPAAR_	1.95385	1.05659	1.33042	1.44696	31.7799
gi|472584922	RHTO_00776	104	pre-mRNA-splicing factor CWC26	0.964482	14.2608	S	_EADPSLRPPS(ph)PT(ph)PEPEDEAPAIAEVTVETAPR_	#DIV/0!	0.443538	0.704771	0.574154	32.1725
gi|472584922	RHTO_00776	106	pre-mRNA-splicing factor CWC26	0.990697	19.4322	T	_EADPSLRPPS(ph)PT(ph)PEPEDEAPAIAEVTVETAPR_	2.85649	1.54703	1.42272	1.94208	40.9014
gi|472584947	RHTO_00801	333	pre-mRNA-splicing factor Cwf21	0.874857	8.66765	S	_RYSPS(ph)PS(ph)RSPS(ph)PR_	#DIV/0!	2.02102	1.31072	1.66587	30.1499
gi|472584947	RHTO_00801	327	pre-mRNA-splicing factor Cwf21	0.977349	18.2773	S	_RYS(ph)PS(ph)PSRSPSPR_	#DIV/0!	2.02102	1.43556	1.72829	23.953
gi|472584947	RHTO_00801	329	pre-mRNA-splicing factor Cwf21	0.983373	20.9684	S	_RYSPS(ph)PS(ph)RSPS(ph)PR_	#DIV/0!	2.02102	1.31072	1.66587	30.1499
gi|472584947	RHTO_00801	269	pre-mRNA-splicing factor Cwf21	0.966429	15.1474	S	_LPYGNSTRS(ph)PS(ph)PPPR_	1.84775	1.15872	1.05637	1.35428	31.7814
gi|472581378	RHTO_05280	271	pre-mRNA-splicing factor Cwf21	0.999844	38.6706	S	_LPYGNSTRS(ph)PS(ph)PPPR_	1.84775	1.15872	1.05637	1.35428	31.7814
gi|472582167	RHTO_03906	195	pre-rRNA processing protein Mrd1	0.873078	8.37515	T	_EST(ph)PDDGVAQDESLTDEQYLAKR_	0.259121	0.112143	0.155265	0.17551	43.0469
gi|472584865	RHTO_00719	627	pre-rRNA-processing protein ESF1	1	80.2116	S	_LGS(ph)DDEQHGGAADFQPQGDDKGFDDDFFADDGEDPFAK_	1.904	1.62981	1.45119	1.66167	13.726
gi|472584197	RHTO_01450	670	pre-rRNA-processing protein ESF1	1	101.868	S	_FDAGVEDS(ph)GDEIGVSKK_	1.84812	1.78731	1.51628	1.71724	10.2881
gi|472584197	RHTO_01450	716	pre-rRNA-processing protein ESF1	1	119.277	S	_LALLVGS(ph)DDEDDVLGDDAAGEGGR_	0.985513	0.848969	0.812216	0.882232	10.3501
gi|472584197	RHTO_01450	75	pre-rRNA-processing protein ESF1	0.997324	25.714	S	_LAS(ph)PEEKEEAGEEESELAEEDDEDDEDEEEAEAPAGGFVDYAR_	0.200449	0.0938527	0.0461276	0.113476	69.6269
gi|472584197	RHTO_01450	172	programmed cell death protein 2	0.95504	13.2733	S	_AISLSMAS(ph)LGS(ph)TDEQAVSEVEK_	#DIV/0!	2.22326	1.07321	1.64824	49.3378
gi|472584197	RHTO_01450	169	programmed cell death protein 2	0.998297	30.3485	S	_AISLSMAS(ph)LGS(ph)TDEQAVSEVEK_	#DIV/0!	2.10186	1.13815	1.62	42.0644
gi|472584197	RHTO_01450	732	programmed cell death protein 2	1	70.2544	S	_DISLDS(ph)PPPDDVM(ox)IDEK_	#DIV/0!	3.47078	1.67971	2.57524	49.1788
gi|472584883	RHTO_00737	125	programmed cell death protein 2	0.871624	8.31853	S	_LLPAPHPS(ph)PTLGPSNPPTSGEADLGK_	1.1427	0.688089	0.630636	0.820475	34.1911
gi|472584883	RHTO_00737	23	programmed cell death protein homolog	0.992666	21.3541	S	_TSDKGYDPATLS(ph)DDEPDSDSGSVTSR_	0.653894	0.673809	#DIV/0!	0.663851	2.12127
gi|472584883	RHTO_00737	29	programmed cell death protein homolog	0.885146	12.1118	S	_TSDKGYDPATLSDDEPDS(ph)DSGSVTSR_	0.4879	0.569671	#DIV/0!	0.528785	10.9346
gi|472584883	RHTO_00737	258	proliferating cell nuclear antigen	1	75.8281	S	_KAVEDS(ph)EEEEGADENGEEASSPK_	2.80002	1.66522	1.52325	1.99617	35.0557
gi|472583243	RHTO_02272	235	proliferating cell nuclear antigen	0.969339	14.9989	S	_ISGS(ph)DDEDDDAPAKSK_	0.193641	#DIV/0!	0.134606	0.164123	25.4346
gi|472587930	RHTO_03154	161	protein AIR1/2	0.987961	19.1419	S	_FVGAPTPLRGNNDGS(ph)EELEEPNVLLPSEAK_	0.650703	0.640328	0.590598	0.627209	5.12241
gi|472584595	RHTO_00935	118	protein CWC15	1	64.0688	S	_LLQEAADLDKDDS(ph)DDEES(ph)EEEDGADKGK_	2.43025	1.79433	1.36793	1.86417	28.6772
gi|472584595	RHTO_00935	123	protein CWC15	1	64.0688	S	_LLQEAADLDKDDS(ph)DDEES(ph)EEEDGADKGK_	2.43025	1.79433	1.36793	1.86417	28.6772
gi|472585267	RHTO_07691	97	protein CWC15	0.998172	27.4584	S	_LLALQSAQDKEESDAAS(ph)ESAAK_	0.757518	0.795102	0.447728	0.666783	28.5904
gi|472587300	RHTO_04979	886	protein HIRA/HIR1	0.982725	17.577	S	_TVPQGS(ph)PTEPQGGAGDFR_	1.63257	1.02245	#DIV/0!	1.32751	32.4984
gi|472587300	RHTO_04979	239	protein of 14-3-3 protein family	0.997004	25.4486	S	_DNLTLWTSDLS(ph)EAPQDAPK_	#DIV/0!	2.57215	1.73343	2.15279	27.5485
gi|472586960	RHTO_04638	241	protein of 14-3-4 protein family	0.996815	28.6634	S	_DNLTLWTSDLS(ph)AEEPAQQEAPK_	#DIV/0!	1.63738	1.32429	1.48084	14.9503
gi|472587300	RHTO_04979	63	protein of caleosin family	0.989627	19.7784	T	_VQVVGELT(ph)PPLT(ph)PPGEKEDSIAAGEGVR_	5.31491	7.42611	2.2668	5.00261	51.8488
gi|472581321	RHTO_05437	59	protein of caleosin family	0.996042	23.9623	T	_VQVVGELT(ph)PPLT(ph)PPGEKEDSIAAGEGVR_	5.31491	7.42611	#DIV/0!	6.37051	23.4337
gi|472581321	RHTO_05437	181	protein of chromatin modification-related protein EAF7 family	1	82.902	S	_HES(ph)PVPDDAPLREVS(ph)VPLPDGETSGR_	4.27533	6.11359	1.68022	4.02305	55.3666
gi|472588366	RHTO_00266	193	protein of chromatin modification-related protein EAF7 family	0.999976	49.0141	S	_HES(ph)PVPDDAPLREVS(ph)VPLPDGETSGR_	1.92864	1.96924	2.19998	2.03262	7.20014
gi|472582973	RHTO_02583	326	protein of chromatin modification-related protein EAF7 family	0.999325	32.1267	S	_ERQDS(ph)T(ph)PASSDAGISTPAKK_	0.900901	1.41788	0.967867	1.09555	25.6626
gi|472582973	RHTO_02583	149	protein of cyclin PHO80-like protein family	0.961603	14.6745	S	_LAPTS(ph)PIEAPSPLPPS(ph)PTISSVDRPR_	#DIV/0!	0.770535	0.8371	0.803818	5.85567
gi|472588366	RHTO_00266	876	protein of cyclin PHO80-like protein family	0.999956	44.8944	S	_TLGSSGDS(ph)S(ph)DDEDDGPVSAGFR_	#DIV/0!	1.39548	2.18317	1.78932	31.128
[truncated: 694 more rows]
