# Supplementary material for: Regulation of autophagy and lipid accumulation under phosphate limitation in Rhodotorula toruloides
Source: Front Microbiol. 2023 Jan 26;13:1046114. doi: 10.3389/fmicb.2022.1046114 (PMC9908577; doi:10.3389/fmicb.2022.1046114)
Supplement: Supplementary file 7 [file Table_4.xls]

## Sheet: Sheet1
Table S4. Phospho sites in phosphoproteomics.
Note: PEP:The score of Andromeda search engine on the modified peptide (the lower score can be trusted).
Proteins ID		Positions within proteins	Protein name	Number of Phospho (STY)	Amino acid	Sequence window	Modification window	Peptide window coverage	PEP	Score	Score for localization	Modified sequence	Phospho (STY) Probabilities
gi|472580263	RHTO_07059	121	splicing factor 3B subunit 2	2	S	DGRDGATDEKGQVIYSDDEMPSEDDEEPAEL	X;X;X;X;X;X;X;X;X;X;X;X;X;X;X;Phospho (STY);X;X;X;Oxidation (M);X;Phospho (STY);X;X;X;X;X;X;X;X;X	XXXPPPPPPPPPPPPPPPPPPPPPPPPPPPP	1.89e-10	121.49	91.114	_DGATDEKGQVIYS(ph)DDEM(ox)PS(ph)EDDEEPAELSKR_	DGATDEKGQVIY(0.023)S(0.976)DDEMPS(0.893)EDDEEPAELS(0.108)KR
gi|472580263	RHTO_07059	127	splicing factor 3B subunit 2	2	S	TDEKGQVIYSDDEMPSEDDEEPAELSKRKQR	X;X;X;X;X;X;X;X;X;Phospho (STY);X;X;X;Oxidation (M);X;Phospho (STY);X;X;X;X;X;X;X;X;X;X;X;X;X;X;X	PPPPPPPPPPPPPPPPPPPPPPPPPPPPXXX	1.89e-10	121.49	121.49	_GQVIYS(ph)DDEM(ox)PS(ph)EDDEEPAELSKR_	GQVIY(0.062)S(0.938)DDEMPS(1)EDDEEPAELSKR
gi|472581182	RHTO_05499	49	DNA ligase	1	S	LNFFSKDQRDRQTAPSPAVEPKAEQKDVEMS;LNFFSKEQRDRQTAPSPAVEPKAEQKDVEMA	X;X;X;X;X;X;X;X;X;X;X;X;X;X;X;Phospho (STY);X;X;X;X;X;X;X;X;X;X;X;X;X;X;X	XXXXXXXXXPPPPPPPPPPPPPXXXXXXXXX	0.010763	90.725	90.725	_DRQTAPS(ph)PAVEPK_	DRQTAPS(1)PAVEPK
gi|472581175	RHTO_05492	177	hypothetical protein		S	GAAAEVLMMGRSAPSSAAPSPTEDQTQAIAQ	X;X;X;X;X;X;X;X;X;X;X;X;X;X;X;Phospho (STY);X;X;X;Phospho (STY);X;X;X;X;X;X;X;X;X;X;X	XXXXXXXXXXXPPPPPPPPPPPPPPPPPPPP	0.00751994	62.677	62.677	_SAPSS(ph)AAPS(ph)PTEDQTQAIAQQR_	S(0.255)APS(0.338)S(0.411)AAPS(0.541)PT(0.444)EDQT(0.01)QAIAQQR
gi|472581175	RHTO_05492	181	hypothetical protein	2	S	EVLMMGRSAPSSAAPSPTEDQTQAIAQQRNG	X;X;X;X;X;X;X;X;X;X;X;Phospho (STY);X;X;X;Phospho (STY);X;X;X;X;X;X;X;X;X;X;X;X;X;X;X	XXXXXXXPPPPPPPPPPPPPPPPPPPPPPXX	0.00751994	62.677	62.677	_SAPSS(ph)AAPS(ph)PTEDQTQAIAQQR_	S(0.255)APS(0.338)S(0.411)AAPS(0.541)PT(0.444)EDQT(0.01)QAIAQQR
gi|472580616	RHTO_06448	162	hypothetical protein	1	S	TPFTPRSPLSPGRTASPPPVNPELAALEAQK	X;X;X;X;X;X;X;X;X;X;X;X;X;X;X;Phospho (STY);X;X;X;X;X;X;X;X;X;X;X;X;X;X;X	XXXXXXXXXXXXXPPPPPPPPPPPPPPPPPP	0.000258481	114.29	65.954	_TAS(ph)PPPVNPELAALEAQKR_	T(0.017)AS(0.983)PPPVNPELAALEAQKR
gi|472580599	RHTO_06431	1064	N-acetyltransferase 10, KRE33	1	S	AQVAAKVLGSKQSLSSTVSIKNPNSTKALKR	X;X;X;X;X;X;X;X;X;X;X;X;X;X;X;Phospho (STY);X;X;X;X;X;X;X;X;X;X;X;X;X;X;X	XXXXXXXXXXXPPPPPPPPPPXXXXXXXXXX	0.00841857	98.337	98.337	_QSLSS(ph)TVSIK_	QS(0.003)LS(0.025)S(0.889)T(0.055)VS(0.027)IK
gi|472580579	RHTO_06411	307	autophagy-related protein 9	1	S	ARSRPNPLQKARRAVSPSTASSSSHRTRRGA;GRARVNPLQKARRAVSPSTASSSSHRTRRGA	X;X;X;X;X;X;X;X;X;X;X;X;X;X;X;Phospho (STY);X;X;X;X;X;X;X;X;X;X;X;X;X;X;X	XXXXXXXXXXXXXPPPPPPPPPPPPPXXXXX	0.00121586	107.5	74.296	_AVS(ph)PSTASSSSHR_	AVS(0.751)PS(0.236)T(0.01)AS(0.001)S(0.001)S(0.001)S(0.001)HR
gi|472580568	RHTO_06400	54	NADH oxidase	2	S	SHELIELYRAWGKGGSALVLTGHVMIDPRAL	X;X;X;X;X;X;X;X;X;X;X;X;X;X;X;Phospho (STY);X;X;X;X;Phospho (STY);X;X;X;Oxidation (M);X;X;X;X;X;X	XXXXXXXXXXXXXPPPPPPPPPPPPPPPPXX	0.010712	74.029	74.029	_GGS(ph)ALVLT(ph)GHVM(ox)IDPR_	GGS(1)ALVLT(1)GHVMIDPR
gi|472580437	RHTO_06538	444	delta-12 fatty acid desaturase	1	S	AYGRARRVAVPAEVPSDSGVEGL________	X;X;X;X;X;X;X;X;X;X;X;X;X;X;X;Phospho (STY);X;X;X;X;X;X;X;X;X;X;X;X;X;X;X	XXXXXXPPPPPPPPPPPPPPPPPXXXXXXXX	1.5e-13	165.17	165.17	_RVAVPAEVPS(ph)DSGVEGL_	RVAVPAEVPS(0.998)DS(0.002)GVEGL
gi|472580437	RHTO_06538	446	delta-12 fatty acid desaturase	1	S	GRARRVAVPAEVPSDSGVEGL__________	X;X;X;X;X;X;X;X;X;X;X;X;X;X;X;Phospho (STY);X;X;X;X;X;X;X;X;X;X;X;X;X;X;X	XXXXPPPPPPPPPPPPPPPPPXXXXXXXXXX	7.72e-14	166.47	62.765	_RVAVPAEVPSDS(ph)GVEGL_	RVAVPAEVPS(0.003)DS(0.997)GVEGL
gi|472580449	RHTO_06550	271	BSD domain protein	1	S	PTASGAASGAPAGRTSLEGAAMNRRDLLLYK;PTTAGGAGAAATGRTSLEGAAMNRRDLLLYK	X;X;X;X;X;X;X;X;X;X;X;X;X;X;X;Phospho (STY);X;X;X;X;X;Oxidation (M);X;X;X;X;X;X;X;X;X	XXXXXXXXXXXXXXPPPPPPPPPPPXXXXXX	0.00722773	156.14	156.14	_TS(ph)LEGAAM(ox)NR_	T(0.025)S(0.975)LEGAAMNR
gi|472585784	RHTO_07677	289	Ca2+:H+ antiporter	1	S	SDDGERRRRTKRGVQSAAGSDDDEVVTRDRG;SDDGERRRRTRRGVQSAAGSDDDEVVTRDRG	X;X;X;X;X;X;X;X;X;X;X;X;X;X;X;Phospho (STY);X;X;X;X;X;X;X;X;X;X;X;X;X;X;X	XXXXXXXXXXXPPPPPPPPPPPPPPPPPXXX	6.33e-11	148.75	148.75	_RGVQS(ph)AAGSDDDEVVTR_	RGVQS(0.807)AAGS(0.193)DDDEVVTR
gi|472585784	RHTO_07677	293	Ca2+:H+ antiporter	1	S	ERRRRTKRGVQSAAGSDDDEVVTRDRGEELV;ERRRRTRRGVQSAAGSDDDEVVTRDRGEELV	X;X;X;X;X;X;X;X;X;X;X;X;X;X;X;Phospho (STY);X;X;X;X;X;X;X;X;X;X;X;X;X;X;X	XXXXXXXPPPPPPPPPPPPPPPPPXXXXXXX	1.57e-289	219.16	187.73	_RGVQSAAGS(ph)DDDEVVTR_	RGVQSAAGS(1)DDDEVVTR
gi|472585760	RHTO_07653	375	conserved hypothetical protein		S	SRRPSYSHYTRLSTVSTPDLRLTTSGESDMP	X;X;X;X;X;X;X;X;X;X;X;X;X;X;X;Phospho (STY);X;X;X;X;X;X;X;Phospho (STY);X;X;X;X;X;Oxidation (M);X	XXXXXXXXXXXPPPPPPPPPPXXXXXXXXXX	0.00881343	113.38	113.38	_LSTVS(ph)TPDLR_	LSTVS(0.5)T(0.5)PDLR
gi|472585663	RHTO_07556	326	protein of chromatin modification-related protein EAF7 family	1;2	S	SNRRSRASNARERQDSTPASSDAGISTPAKK	X;X;X;X;X;X;X;X;X;X;X;X;X;X;X;Phospho (STY);Phospho (STY);X;X;X;X;X;X;X;X;X;X;X;X;X;X	XXXXXXXXXXXPPPPPPPPPPPPPPPPPPPP	1.4e-08	124.81	124.81	_ERQDS(ph)T(ph)PASSDAGISTPAKK_	ERQDS(0.999)T(0.999)PAS(0.001)SDAGISTPAKK
gi|472585602	RHTO_07495	147	nuclear pore complex protein Nup98-Nup96	1;2	S	RASSRRALVPGRRELSSTPAATAAQKKLFAG;RASSRRPLVPARRELSSTPAATAAQKKLFAG	X;X;X;X;X;X;X;X;X;X;X;X;X;X;X;Phospho (STY);Phospho (STY);Phospho (STY);X;X;X;X;X;X;X;X;X;X;X;X;X	XXXXXXXXXXXXPPPPPPPPPPPPPPPXXXX	0.000514098	116.51	99.069	_ELS(ph)S(ph)TPAATAAQKK_	ELS(0.991)S(0.505)T(0.505)PAATAAQKK
gi|472585602	RHTO_07495	148	nuclear pore complex protein Nup98-Nup96	2	S	ASSRRALVPGRRELSSTPAATAAQKKLFAGA;ASSRRPLVPARRELSSTPAATAAQKKLFAGA	X;X;X;X;X;X;X;X;X;X;X;X;X;X;Phospho (STY);Phospho (STY);Phospho (STY);X;X;X;X;X;X;X;X;X;X;X;X;X;X	XXXXXXXXXXXPPPPPPPPPPPPPPPXXXXX	0.00173875	101.49	61.127	_RELS(ph)S(ph)TPAATAAQK_	RELS(0.646)S(0.707)T(0.646)PAATAAQK
gi|472585602	RHTO_07495	13	nuclear pore complex protein Nup98-Nup96		S	___MARFGLLSDSEDSSDGERSHASTRHRSS;___MARFGLLSDSEDSSDGERSHTSTRHRSS	X;X;X;X;X;X;X;X;X;X;X;X;X;X;X;Phospho (STY);X;X;X;X;X;X;X;X;X;X;X;X;X;X;X	XXXXXXPPPPPPPPPPPPPPPXXXXXXXXXX	9.54e-25	190.55	190.55	_FGLLSDSEDS(ph)SDGER_	FGLLSDS(0.021)EDS(0.489)S(0.489)DGER
gi|472585602	RHTO_07495	14	nuclear pore complex protein Nup98-Nup96	1	S	__MARFGLLSDSEDSSDGERSHASTRHRSSS;__MARFGLLSDSEDSSDGERSHTSTRHRSSS	X;X;X;X;X;X;X;X;X;X;X;X;X;X;X;Phospho (STY);X;X;X;X;X;X;X;X;X;X;X;X;X;X;X	XXXXXPPPPPPPPPPPPPPPXXXXXXXXXXX	3.43e-130	201.18	179.09	_FGLLSDSEDSS(ph)DGER_	FGLLSDS(0.001)EDS(0.142)S(0.857)DGER
gi|472585580	RHTO_07473	1031	conserved hypothetical protein	1	S	LERNLDDLERALAELSPRAIPTSRMPNSPST;LERNLDDLERALAELSPRALPTSRMPHSPST	X;X;X;X;X;X;X;X;X;X;X;X;X;X;X;Phospho (STY);X;X;X;X;X;X;X;X;X;X;X;X;X;X;X	XXXXXXXXXXPPPPPPPPXXXXXXXXXXXXX	0.00718406	108.47	108.47	_ALAELS(ph)PR_	ALAELS(1)PR
gi|472585580	RHTO_07473	935	conserved hypothetical protein	1	S	APAASSPTEEERAQTSPFLASHSSKTSISTI;APAASSSSGEERAQTSPFLASHSSKTSISTI	X;X;X;X;X;X;X;X;X;X;X;X;X;X;X;Phospho (STY);X;X;X;X;X;X;X;X;X;X;X;X;X;X;X	XXXXXXXXXXXXPPPPPPPPPPPPPXXXXXX	0.000661761	111.78	84.41	_AQTS(ph)PFLASHSSK_	AQT(0.016)S(0.984)PFLASHSSK
gi|472585580	RHTO_07473	1327	conserved hypothetical protein	1;2	S	PPRKQSLDVARPRRPSVSGSLPRDFAADEPL	X;X;X;X;X;X;X;X;X;X;X;X;X;X;X;Phospho (STY);X;Phospho (STY);X;Phospho (STY);X;X;X;X;X;X;X;X;X;X;X	XXXXXXXXXXXXXPPPPPPPPPPXXXXXXXX	0.00602861	95.264	70.438	_RPS(ph)VS(ph)GSLPR_	RPS(1)VS(0.726)GS(0.275)LPR
gi|472585580	RHTO_07473	1329	conserved hypothetical protein	2	S	RKQSLDVARPRRPSVSGSLPRDFAADEPLPP	X;X;X;X;X;X;X;X;X;X;X;X;X;Phospho (STY);X;Phospho (STY);X;X;X;X;X;X;X;X;X;X;X;X;X;X;X	XXXXXXXXXXXPPPPPPPPPPXXXXXXXXXX	0.00602861	95.264	70.438	_RPS(ph)VS(ph)GSLPR_	RPS(1)VS(0.726)GS(0.275)LPR
gi|472585580	RHTO_07473	1331	conserved hypothetical protein	1;2	S	QSLDVARPRRPSVSGSLPRDFAADEPLPPFP	X;X;X;X;X;X;X;X;X;X;X;Phospho (STY);X;X;X;Phospho (STY);X;X;X;X;X;X;X;X;X;X;X;X;X;X;X	XXXXXXXXXPPPPPPPPPPXXXXXXXXXXXX	0.00518206	101.53	72.315	_RPS(ph)VSGS(ph)LPR_	RPS(0.944)VS(0.158)GS(0.898)LPR
gi|472585580	RHTO_07473	150	conserved hypothetical protein	1	S	RSVLGYTSSTRSTTGSPYRRQATASGLSNRR;RSVLGYTSSTRSTTGSPYRRRATTSGLSSGR	X;X;X;X;X;X;X;X;X;X;X;X;X;X;X;Phospho (STY);X;X;X;X;X;X;Phospho (STY);X;X;X;X;X;X;X;X	XXXXXXXXXXXPPPPPPPPPXXXXXXXXXXX	0.0129784	71.085	71.085	_STTGS(ph)PYRR_	STT(0.185)GS(0.815)PYRR
gi|472585563	RHTO_07456	285	hypothetical protein	1;2	S	TSLDTFYHHRLHRTPSPPTDLPRLTKANFPL	X;X;X;X;X;X;X;X;X;X;X;X;X;Phospho (STY);X;Phospho (STY);X;X;X;X;X;X;X;X;X;X;X;X;X;X;X	XXXXXXXXXXPPPPPPPPPPPPPXXXXXXXX	0.000958853	140.14	140.14	_TPS(ph)PPTDLPR_	TPS(1)PPTDLPR
gi|472585563	RHTO_07456	459	hypothetical protein	1	S	VSLPPPPRPSSGRRMSEQSEALDAPARTRLR;VSLPPPSRPSSGRRMSEQSEALDAPARTRLR	X;X;X;X;X;X;X;X;X;X;X;X;X;X;Oxidation (M);Phospho (STY);X;X;X;X;X;X;X;X;X;X;X;X;X;X;X	XXXXXXXXXXXXXPPPPPPPPPPPPPPXXXX	4.21e-06	124.08	124.08	_RM(ox)S(ph)EQSEALDAPAR_	RMS(1)EQSEALDAPAR
gi|472585547	RHTO_07440	583	DNA-binding protein creA	1	S	STSPVLGPLKGLTLMSAQVSRAPSRATSPVH	X;X;X;X;X;X;X;X;X;X;X;X;X;X;Oxidation (M);Phospho (STY);X;X;X;X;X;X;X;X;X;X;Phospho (STY);Phospho (STY);X;X;X	XXXXXXXXXXPPPPPPPPPPPXXXXXXXXXX	0.00335931	139.58	139.58	_GLTLM(ox)S(ph)AQVSR_	GLTLMS(1)AQVSR
gi|472585547	RHTO_07440	479	DNA-binding protein creA	3	S	RHAYAPYSLPSTADHSLANSPASSPKHTSDG	X;X;X;X;X;X;X;X;X;X;X;X;X;X;X;Phospho (STY);X;X;X;Phospho (STY);X;X;X;Phospho (STY);X;X;X;X;X;X;X	XPPPPPPPPPPPPPPPPPPPPPPPPPXXXXX	2.93e-05	98.627	70.67	_HAYAPYSLPSTADHS(ph)LANS(ph)PASS(ph)PK_	HAY(0.002)APY(0.005)S(0.002)LPS(0.003)T(0.008)ADHS(0.974)LANS(0.98)PAS(0.057)S(0.969)PK
gi|472585547	RHTO_07440	483	DNA-binding protein creA	2;3	S	APYSLPSTADHSLANSPASSPKHTSDGAVVD	X;X;X;X;X;X;X;X;X;X;X;Phospho (STY);X;X;X;Phospho (STY);X;X;Phospho (STY);Phospho (STY);X;X;X;X;X;X;X;X;X;X;X	PPPPPPPPPPPPPPPPPPPPPPXXXXXXXXX	2.93e-05	98.627	98.627	_HAYAPYSLPSTADHS(ph)LANS(ph)PASS(ph)PK_	HAYAPYSLPS(0.066)T(0.066)ADHS(0.868)LANS(0.997)PAS(0.25)S(0.753)PK
gi|472585547	RHTO_07440	486	DNA-binding protein creA	2	S	SLPSTADHSLANSPASSPKHTSDGAVVDHNV	X;X;X;X;X;X;X;X;X;X;X;X;Phospho (STY);X;X;Phospho (STY);X;X;X;X;X;X;X;X;X;X;X;X;X;X;X	PPPPPPPPPPPPPPPPPPPXXXXXXXXXXXX	0.00264917	74.029	74.029	_HAYAPYSLPSTADHSLANS(ph)PAS(ph)SPK_	HAYAPYSLPS(0.002)T(0.002)ADHS(0.002)LANS(0.988)PAS(0.503)S(0.503)PK
gi|472585547	RHTO_07440	487	DNA-binding protein creA	2;3	S	LPSTADHSLANSPASSPKHTSDGAVVDHNVA	X;X;X;X;X;X;X;Phospho (STY);X;X;X;Phospho (STY);X;X;X;Phospho (STY);X;X;X;X;X;X;X;X;X;X;X;X;X;X;X	PPPPPPPPPPPPPPPPPPXXXXXXXXXXXXX	2.93e-05	98.627	70.67	_HAYAPYSLPSTADHS(ph)LANS(ph)PASS(ph)PK_	HAY(0.002)APY(0.005)S(0.002)LPS(0.003)T(0.008)ADHS(0.974)LANS(0.98)PAS(0.057)S(0.969)PK
gi|472585547	RHTO_07440	661	DNA-binding protein creA	1	S	HLHHVRAHPYRSQPGSPVLAAQGSSRPGTAS;NLHHVRAHPYRSQPGSPVLAAQGSSRPGTAS	X;X;X;X;X;X;X;X;X;X;X;X;X;X;X;Phospho (STY);X;X;X;X;X;X;X;X;X;X;X;X;X;X;X	XXXXXXXXXXXPPPPPPPPPPPPPPPPPPPP	2.27e-09	127.96	54.253	_SQPGS(ph)PVLAAQGSSRPGTASR_	S(0.002)QPGS(0.996)PVLAAQGS(0.001)SRPGTASR
gi|472583996	RHTO_01672	1167	PX domain-containing protein		S	GKIGGAMLGRKLSRRSSNVSQVRKDGYHDED;GKIGGAMLGRKLSRRSSNVSQVRKDGYRDAE	X;X;X;X;X;X;X;X;X;X;X;X;X;X;X;Phospho (STY);X;X;X;X;X;X;X;X;X;X;X;X;X;X;X	XXXXXXXXXXXXXXPPPPPPPPPXXXXXXXX	0.00328385	120.53	120.53	_RS(ph)SNVSQVR_	RS(0.499)S(0.499)NVS(0.001)QVR
gi|472583996	RHTO_01672	1168	PX domain-containing protein	1	S	KIGGAMLGRKLSRRSSNVSQVRKDGYHDEDE;KIGGAMLGRKLSRRSSNVSQVRKDGYRDAEE	X;X;X;X;X;X;X;X;X;X;X;X;X;X;X;Phospho (STY);X;X;X;X;X;X;X;X;X;X;X;X;X;X;X	XXXXXXXXXXXXXPPPPPPPPPXXXXXXXXX	0.00328385	120.53	105.03	_RSS(ph)NVSQVR_	RS(0.041)S(0.959)NVSQVR
gi|472584013	RHTO_01689	374	DUF1769 family protein	1	S	ADQLASPVEGRKRAQSVGVQYKPKAEVQEAL	X;X;X;X;X;X;X;X;X;X;X;X;X;X;X;Phospho (STY);X;X;X;X;X;X;X;X;X;X;X;X;X;X;X	XXXXXXXXXXXXXPPPPPPPPPPPXXXXXXX	0.000298626	153.94	153.94	_AQS(ph)VGVQYKPK_	AQS(1)VGVQYKPK
gi|472584017	RHTO_01693	11	fungal specific actin related protein	1	S	_____MSSPPRFAPGSTSPTQSRPRATPSRP	X;X;X;X;X;X;X;X;X;X;X;X;X;X;X;Phospho (STY);X;X;X;X;X;X;X;X;X;X;X;X;X;X;X	XXXXXXXXXXXPPPPPPPPPPPPPPXXXXXX	0.00156322	105.39	105.39	_FAPGS(ph)TSPTQSRPR_	FAPGS(0.91)T(0.03)S(0.03)PT(0.03)QSRPR
gi|472584017	RHTO_01693	13	fungal specific actin related protein	1	S	___MSSPPRFAPGSTSPTQSRPRATPSRPTQ	X;X;X;X;X;X;X;X;X;X;X;X;X;X;X;Phospho (STY);X;X;X;X;X;X;X;X;X;X;X;X;X;X;X	XXXXXXXXXPPPPPPPPPPPPPPXXXXXXXX	3.89e-06	136.36	136.36	_FAPGSTS(ph)PTQSRPR_	FAPGS(0.008)T(0.166)S(0.657)PT(0.166)QS(0.002)RPR
gi|472584024	RHTO_01700	671	conserved hypothetical protein	1	S	QSASTAALSSRNRSSSLLSPASLAAEKAALE	X;X;X;X;X;X;X;X;X;X;X;X;X;X;X;Phospho (STY);X;X;X;X;X;X;X;X;X;X;X;X;X;X;X	XXXXXXXXXXXXXPPPPPPPPPPPPPPXXXX	3.73e-06	138.05	138.05	_SSS(ph)LLSPASLAAEK_	SS(0.045)S(0.955)LLSPASLAAEK
gi|472584024	RHTO_01700	742	conserved hypothetical protein	1	S	PFFALASSGSSMRSYSTGDQPWLGNQLRRFS;PPFALASSGSSMRSYSTGDQPWLGNQLRRFS	X;X;X;X;X;X;X;X;X;X;X;X;X;X;X;Phospho (STY);X;X;X;X;X;X;X;X;X;X;X;X;X;X;X	XXXXXXXXXXXXXPPPPPPPPPPPPPPPXXX	0.000181851	141.13	141.13	_SYS(ph)TGDQPWLGNQLR_	SYS(0.999)TGDQPWLGNQLR
gi|472582393	RHTO_03883	136	conserved hypothetical protein	1	S	NTFPTGLPPLPTRTSSLTGSLAAKVPLTPAP	X;X;X;X;X;X;X;X;X;X;X;X;X;X;X;Phospho (STY);X;X;X;X;X;X;X;X;X;X;X;X;X;X;X	XXXXXXXXXXXXXPPPPPPPPPPPXXXXXXX	0.0119121	116.19	116.19	_TSS(ph)LTGSLAAK_	TS(0.001)S(0.999)LTGSLAAK
gi|472582370	RHTO_03860	419	hypothetical protein	1	S	LAPPGKGGGAKGRKLSPMGERILRGGY____	X;X;X;X;X;X;X;X;X;X;X;X;X;X;X;Phospho (STY);X;Oxidation (M);X;X;X;X;X;X;X;X;X;X;X;X;X	XXXXXXXXXXXXXPPPPPPPPXXXXXXXXXX	0.00981076	73.951	60.255	_KLS(ph)PM(ox)GER_	KLS(1)PMGER
gi|472582370	RHTO_03860	345	hypothetical protein	1	S	AGGGGGPGFGLFRRFSIGGLGSRKPSQPAPA;AGGGGGPGFGLFRRFSIGGLGSRKPSQPAPP	X;X;X;X;X;X;X;X;X;X;X;X;X;X;X;Phospho (STY);X;X;X;X;X;X;X;X;X;X;X;X;X;X;X	XXXXXXXXXXXXXPPPPPPPPPPXXXXXXXX	0.000590578	136.6	136.6	_RFS(ph)IGGLGSR_	RFS(1)IGGLGSR
gi|472582370	RHTO_03860	235	hypothetical protein	1	S	GAGSTGPSPAAIGPRSPPATDSFLQRRGSLS	X;X;X;X;X;X;X;X;X;X;X;X;X;X;X;Phospho (STY);X;X;X;X;X;X;X;X;X;X;X;X;X;X;X	XXXXXXXXXXXXXXXPPPPPPPPPPPXXXXX	0.000511705	116.24	116.24	_S(ph)PPATDSFLQR_	S(1)PPATDSFLQR
gi|472580293	RHTO_06689	264	pre-mRNA-splicing factor ATP-dependent RNA helicase DHX16	2	S	KLAADDPDSVKRQMGSLRERSRQSYLGKREQ	X;X;X;X;X;X;X;X;X;X;X;X;X;Oxidation (M);X;Phospho (STY);X;X;X;X;Phospho (STY);X;X;X;X;X;X;X;X;X;X	XXXXXXXXXXXXPPPPPPPPPPXXXXXXXXX	2.25e-05	96.866	96.866	_QM(ox)GS(ph)LRERS(ph)R_	QMGS(1)LRERS(1)R
gi|472580293	RHTO_06689	269	pre-mRNA-splicing factor ATP-dependent RNA helicase DHX16	2	S	DPDSVKRQMGSLRERSRQSYLGKREQQQLDL	X;X;X;X;X;X;X;X;Oxidation (M);X;Phospho (STY);X;X;X;X;Phospho (STY);X;X;X;X;X;X;X;X;X;X;X;X;X;X;X	XXXXXXXPPPPPPPPPPXXXXXXXXXXXXXX	2.25e-05	96.866	96.866	_QM(ox)GS(ph)LRERS(ph)R_	QMGS(1)LRERS(1)R
gi|472582100	RHTO_04094	23	hypothetical protein	1	S	LSSSSSSRANAGRGASPAVVGGQGGGLPDLD	X;X;X;X;X;X;X;X;X;X;X;X;X;X;X;Phospho (STY);X;X;X;X;X;X;X;X;X;X;X;X;X;X;X	XXXXXXXXXXXXXPPPPPPPPPPPPPPPPPP	3.51e-26	165.42	165.42	_GAS(ph)PAVVGGQGGGLPDLDPLR_	GAS(1)PAVVGGQGGGLPDLDPLR
gi|472582089	RHTO_04083	343	DUF803 domain membrane protein	1	S	QRHSLLEQSNRLSLASDCEGNERGPDARNST	X;X;X;X;X;X;X;X;X;X;X;X;X;X;X;Phospho (STY);X;X;X;X;X;X;X;X;X;X;X;X;X;X;Phospho (STY)	XXXXXXXXXXXPPPPPPPPPPPPPPPPPXXX	0.00157048	110.44	110.44	_LSLAS(ph)DCEGNERGPDAR_	LSLAS(1)DCEGNERGPDAR
gi|472582078	RHTO_04072	463	ATP-dependent rna helicase dhx8	1	S	EAPFLAGQTKRALELSPVKIVKAPDGTMNRA	X;X;X;X;X;X;X;X;X;X;X;X;X;X;X;Phospho (STY);X;X;X;X;X;X;X;X;X;X;X;X;X;X;X	XXXXXXXXXXPPPPPPPPPPPPXXXXXXXXX	0.00216258	140.49	102.97	_RALELS(ph)PVK_	RALELS(1)PVK
gi|472582056	RHTO_04050	6	structure-specific endonuclease subunit SLX1	1	S	__________MPRASSPALAARRSSYPSTST	X;X;X;X;X;X;X;X;X;X;X;X;X;X;X;Phospho (STY);X;X;X;X;X;X;X;X;X;X;X;X;X;X;X	XXXXXXXXXXXXXPPPPPPPPPXXXXXXXXX	0.00556836	115.29	112.13	_ASS(ph)PALAAR_	AS(0.017)S(0.983)PALAAR
gi|472582051	RHTO_04045	367	hydroxymethylglutaryl-CoA reductase (NADPH)	1	S	SNPAIGPGGAYAGAASRGTSTPSGNGKLVTP	X;X;X;X;X;X;X;X;X;X;X;X;X;X;X;Phospho (STY);X;X;X;X;X;X;X;X;X;X;X;X;X;X;X	PPPPPPPPPPPPPPPPPXXXXXXXXXXXXXX	5.21e-24	171.78	171.78	_AVFSNPAIGPGGAYAGAAS(ph)R_	AVFSNPAIGPGGAYAGAAS(1)R
gi|472582051	RHTO_04045	785	hydroxymethylglutaryl-CoA reductase (NADPH)	2;3	S	APTVVKVSAAKPRRDSDSSDESAPGSPILIR	X;X;X;X;X;X;X;X;X;X;X;X;X;X;X;Phospho (STY);X;Phospho (STY);Phospho (STY);X;X;Phospho (STY);X;X;X;X;X;X;X;X;X	XXXXXXXXXXXXXPPPPPPPPPPPPPPPPPP	5.5e-57	221.43	221.43	_RDS(ph)DS(ph)SDESAPGSPILIR_	RDS(1)DS(0.998)SDES(0.001)APGSPILIR
gi|472582051	RHTO_04045	787	hydroxymethylglutaryl-CoA reductase (NADPH)	2;3	S	TVVKVSAAKPRRDSDSSDESAPGSPILIRTR	X;X;X;X;X;X;X;X;X;X;X;X;X;Phospho (STY);X;Phospho (STY);Phospho (STY);X;X;X;X;X;X;X;X;X;X;X;X;X;X	XXXXXXXXXXXPPPPPPPPPPPPPPPPPPXX	5.5e-57	221.43	221.43	_RDS(ph)DS(ph)SDESAPGSPILIR_	RDS(1)DS(0.998)SDES(0.001)APGSPILIR
gi|472582051	RHTO_04045	788	hydroxymethylglutaryl-CoA reductase (NADPH)	2;3	S	VVKVSAAKPRRDSDSSDESAPGSPILIRTRK	X;X;X;X;X;X;X;X;X;X;X;X;Phospho (STY);X;Phospho (STY);Phospho (STY);X;X;X;X;X;X;X;X;X;X;X;X;X;X;X	XXXXXXXXXXPPPPPPPPPPPPPPPPPPXXX	1.87e-11	147.41	147.41	_RDS(ph)DS(ph)S(ph)DESAPGSPILIR_	RDS(1)DS(0.994)S(0.994)DES(0.012)APGSPILIR
gi|472582051	RHTO_04045	791	hydroxymethylglutaryl-CoA reductase (NADPH)	2	S	VSAAKPRRDSDSSDESAPGSPILIRTRKALN	X;X;X;X;X;X;X;X;X;Phospho (STY);X;X;X;X;X;Phospho (STY);X;X;X;X;X;X;X;X;X;X;X;X;X;X;X	XXXXXXXPPPPPPPPPPPPPPPPPPXXXXXX	2.65e-36	197.46	197.46	_RDS(ph)DSSDES(ph)APGSPILIR_	RDS(0.983)DS(0.02)S(0.419)DES(0.578)APGSPILIR
gi|472584273	RHTO_01526	225	zinc finger, RING-type protein	2;3	S	MNSNKTPKAQIVELPSSEGEGPETDPDGTGD	X;X;X;X;X;X;X;X;X;X;X;X;X;X;X;Phospho (STY);Phospho (STY);X;X;X;X;X;X;Phospho (STY);X;X;X;X;Phospho (STY);X;X	XXXXXXXXPPPPPPPPPPPPPPPPPPPPPPP	4.39e-13	97.128	68.934	_AQIVELPS(ph)S(ph)EGEGPET(ph)DPDGTGDFPEAAHSEAAR_	AQIVELPS(1)S(1)EGEGPET(0.812)DPDGT(0.16)GDFPEAAHS(0.028)EAAR
gi|472584273	RHTO_01526	226	zinc finger, RING-type protein	2;3	S	NSNKTPKAQIVELPSSEGEGPETDPDGTGDF	X;X;X;X;X;X;X;X;X;X;X;X;X;X;Phospho (STY);Phospho (STY);X;X;X;X;X;X;Phospho (STY);X;X;X;X;X;X;X;X	XXXXXXXPPPPPPPPPPPPPPPPPPPPPPPP	4.39e-13	97.128	68.934	_AQIVELPS(ph)S(ph)EGEGPET(ph)DPDGTGDFPEAAHSEAAR_	AQIVELPS(1)S(1)EGEGPET(0.812)DPDGT(0.16)GDFPEAAHS(0.028)EAAR
gi|472584273	RHTO_01526	360	zinc finger, RING-type protein	1	S	EEDAADGSRPLRRQLSQETIKSSLAGMSLRD	X;X;X;X;X;X;X;X;X;X;X;X;X;X;X;Phospho (STY);X;X;X;X;X;X;X;X;X;X;X;X;X;X;X	XXXXXXXXXXXXXPPPPPPPPXXXXXXXXXX	0.00289708	136.96	115.29	_QLS(ph)QETIK_	QLS(1)QETIK
gi|472584220	RHTO_01473	104	minichromosome maintenance protein 2	1	S	LDVYDQADLNDQDDFSDDQDARRAAEASMER	X;X;X;X;X;X;X;X;X;X;X;X;X;X;X;Phospho (STY);X;X;X;X;X;X;X;X;X;X;X;X;X;X;X	PPPPPPPPPPPPPPPPPPPPPPPXXXXXXXX	4.42e-89	233.59	79.467	_KLDVYDQADLNDQDDFS(ph)DDQDARR_	KLDVYDQADLNDQDDFS(1)DDQDARR
gi|472584220	RHTO_01473	145	minichromosome maintenance protein 2	1;2	S	AAGERRKARMPGFLASDEEDSEDEGQLLGRR	X;X;X;X;X;X;X;X;X;Oxidation (M);X;X;X;X;X;Phospho (STY);X;X;X;X;Phospho (STY);X;X;X;X;X;X;X;X;X;X	XXXXXXXXXPPPPPPPPPPPPPPPPPPPPPP	4.82e-12	143.54	73.649	_M(ox)PGFLAS(ph)DEEDS(ph)EDEGQLLGRR_	MPGFLAS(1)DEEDS(1)EDEGQLLGRR
gi|472584220	RHTO_01473	150	minichromosome maintenance protein 2	2	S	RKARMPGFLASDEEDSEDEGQLLGRRRVRRM	X;X;X;X;Oxidation (M);X;X;X;X;X;Phospho (STY);X;X;X;X;Phospho (STY);X;X;X;X;X;X;X;X;X;X;X;X;X;X;X	XXXXPPPPPPPPPPPPPPPPPPPPPPXXXXX	4.82e-12	143.54	73.649	_M(ox)PGFLAS(ph)DEEDS(ph)EDEGQLLGRR_	MPGFLAS(1)DEEDS(1)EDEGQLLGRR
gi|472584182	RHTO_01435	421	phospholipid-translocating ATPase		S	SYPPSALGRSTRSKRSSSDVVSYEHATPGTA	X;X;X;X;X;X;X;X;X;X;X;X;X;X;X;Phospho (STY);X;X;X;X;X;X;X;X;X;X;X;X;X;X;X	XXXXXXXXXXXXXXPPPPPPPPPPPPPPPPP	3.06e-12	161.95	72.145	_RS(ph)SSDVVSYEHATPGTAK_	RS(0.491)S(0.491)S(0.018)DVVSYEHATPGTAK
gi|472584182	RHTO_01435	422	phospholipid-translocating ATPase	1	S	YPPSALGRSTRSKRSSSDVVSYEHATPGTAK	X;X;X;X;X;X;X;X;X;X;X;X;X;X;X;Phospho (STY);X;X;X;X;X;X;X;X;X;X;X;X;X;X;X	XXXXXXXXXXXXXPPPPPPPPPPPPPPPPPP	3.06e-12	161.95	79.568	_RSS(ph)SDVVSYEHATPGTAK_	RS(0.096)S(0.779)S(0.123)DVVS(0.003)YEHATPGTAK
gi|472584182	RHTO_01435	423	phospholipid-translocating ATPase		S	PPSALGRSTRSKRSSSDVVSYEHATPGTAKW	X;X;X;X;X;X;X;X;X;X;X;X;X;X;X;X;X;X;X;X;X;X;X;X;X;X;X;X;X;X;X	XXXXXXXXXXXXXXXXXXXXXXXXXXXXXXX	3.06e-12	161.95	161.95	_S(ph)SSDVVSYEHATPGTAK_	S(0.333)S(0.333)S(0.333)DVVSYEHATPGTAK
gi|472584175	RHTO_01428	165	Histone H4 acetyltransferase, NuA4 complex, Eaf6 family protein	1;2	S	TYQRSIELRSAEHTASASVEPESDEDGASFR	X;X;X;X;X;X;X;X;X;X;X;X;X;X;X;Phospho (STY);X;X;X;X;X;X;Phospho (STY);X;X;X;X;X;X;X;X	XXXXXXXXXPPPPPPPPPPPPPPPPPPPPPP	4.29e-05	106.58	69.845	_SAEHTAS(ph)ASVEPES(ph)DEDGASFRR_	S(0.02)AEHT(0.031)AS(0.721)AS(0.229)VEPES(0.999)DEDGASFRR
gi|472584175	RHTO_01428	167	Histone H4 acetyltransferase, NuA4 complex, Eaf6 family protein		S	QRSIELRSAEHTASASVEPESDEDGASFRRK	X;X;X;X;X;X;X;X;X;X;X;X;X;X;X;X;X;X;X;X;X;X;X;X;X;X;X;X;X;X;X	XXXXXXXXXXXXXXXXXXXXXXXXXXXXXXX	0.00501197	74.222	74.222	_SAEHTAS(ph)ASVEPESDEDGASFRR_	S(0.001)AEHT(0.083)AS(0.416)AS(0.416)VEPES(0.083)DEDGASFRR
gi|472584175	RHTO_01428	172	Histone H4 acetyltransferase, NuA4 complex, Eaf6 family protein	1;2	S	LRSAEHTASASVEPESDEDGASFRRKRSRQH	X;X;X;X;X;X;X;X;Phospho (STY);X;X;X;X;X;X;Phospho (STY);X;X;X;X;X;X;X;X;X;X;X;X;X;X;X	XXPPPPPPPPPPPPPPPPPPPPPPPXXXXXX	4.55e-110	251.37	251.37	_SAEHTASASVEPES(ph)DEDGASFR_	SAEHTASASVEPES(1)DEDGASFR
gi|472584163	RHTO_01416	199	poly(A)+ mRNA-nucleus export-related protein	2	S	AAANRAFHLSLARSKSLSPGLARSTASADVS	X;X;X;X;X;X;X;X;X;X;X;X;X;X;X;Phospho (STY);X;Phospho (STY);X;X;X;X;X;X;X;X;X;X;X;X;X	XXXXXXXXXXXXXPPPPPPPPPPXXXXXXXX	0.00360539	141.34	141.34	_SKS(ph)LS(ph)PGLAR_	SKS(1)LS(1)PGLAR
gi|472584163	RHTO_01416	201	poly(A)+ mRNA-nucleus export-related protein	1;2	S	ANRAFHLSLARSKSLSPGLARSTASADVSSI	X;X;X;X;X;X;X;X;X;X;X;X;X;Phospho (STY);X;Phospho (STY);X;X;X;X;X;X;X;X;X;X;X;X;X;X;X	XXXXXXXXXXXPPPPPPPPPPXXXXXXXXXX	0.00360539	141.34	141.34	_SKS(ph)LS(ph)PGLAR_	SKS(1)LS(1)PGLAR
gi|472584145	RHTO_01398	58	ribosome assembly protein Noc2	1	S	NKGVLPAHQQVKDVDSADEFEEVKRKRKEKE	X;X;X;X;X;X;X;X;X;X;X;X;X;X;X;Phospho (STY);X;X;X;X;X;X;X;X;X;X;X;X;X;X;X	XXPPPPPPPPPPPPPPPPPPPPPPPPXXXXX	0.00146545	124.78	67.644	_GVLPAHQQVKDVDS(ph)ADEFEEVKR_	GVLPAHQQVKDVDS(1)ADEFEEVKR
gi|472584139	RHTO_01392	366	N-acetyl-gamma-glutamyl-phosphate reductase / acetylglutamate kinase	1	S	AGTLLRRGYKLYKHASIDAVGQDRLRRVLSE	X;X;X;X;X;X;X;X;X;X;X;X;X;X;X;Phospho (STY);X;X;X;X;X;X;X;X;X;X;X;X;X;X;X	XXXXXXXXXXXXXPPPPPPPPPPPXXXXXXX	1.77e-09	170.11	170.11	_HAS(ph)IDAVGQDR_	HAS(1)IDAVGQDR
gi|472584133	RHTO_01386	427	DUF2841 family protein	3	S	SNRLESVEEQQTPRGSASPSAAPSLPRSQSA	X;X;X;X;X;X;X;X;X;X;X;Phospho (STY);X;X;X;Phospho (STY);X;Phospho (STY);X;X;X;X;X;X;X;X;X;X;X;Phospho (STY);X	PPPPPPPPPPPPPPPPPPPPPPPPPPPXXXX	7.34e-05	79.917	79.917	_SLASQNDGGSNRLESVEEQQT(ph)PRGS(ph)AS(ph)PSAAPSLPR_	SLASQNDGGSNRLES(0.002)VEEQQT(0.997)PRGS(0.972)AS(0.992)PS(0.035)AAPS(0.002)LPR
gi|472584133	RHTO_01386	429	DUF2841 family protein	3	S	RLESVEEQQTPRGSASPSAAPSLPRSQSAMD	X;X;X;X;X;X;X;X;X;Phospho (STY);X;X;X;Phospho (STY);X;Phospho (STY);X;X;X;X;X;X;X;X;X;X;X;Phospho (STY);X;Oxidation (M);X	PPPPPPPPPPPPPPPPPPPPPPPPPXXXXXX	7.34e-05	79.917	79.917	_SLASQNDGGSNRLESVEEQQT(ph)PRGS(ph)AS(ph)PSAAPSLPR_	SLASQNDGGSNRLES(0.002)VEEQQT(0.997)PRGS(0.972)AS(0.992)PS(0.035)AAPS(0.002)LPR
gi|472584133	RHTO_01386	441	DUF2841 family protein	1	S	GSASPSAAPSLPRSQSAMDVRDLASSSAAPY;GSASPSAAPSLPRSQSAMDVRDLASTSAAPY	X;Phospho (STY);X;Phospho (STY);X;X;X;X;X;X;X;X;X;X;X;Phospho (STY);X;Oxidation (M);X;X;X;X;X;X;X;X;X;X;X;X;X	XXXXXXXXXXXXXPPPPPPPPXXXXXXXXXX	0.00408537	113.69	113.69	_SQS(ph)AM(ox)DVR_	S(0.017)QS(0.983)AMDVR
gi|472584133	RHTO_01386	488	DUF2841 family protein	1	S	TNESPASAPPLARSQSFAGPVTSAGRSRNAM	X;X;X;X;X;X;X;X;X;X;X;X;X;X;X;Phospho (STY);X;X;X;X;X;X;X;X;X;X;X;X;X;X;X	XXXXXXXXXXXXXPPPPPPPPPPPPPXXXXX	0.00262309	92.439	83.758	_SQS(ph)FAGPVTSAGR_	SQS(1)FAGPVTSAGR
gi|472584133	RHTO_01386	495	DUF2841 family protein	1	S	APPLARSQSFAGPVTSAGRSRNAMRQSGRGS	X;X;X;X;X;X;X;X;X;X;X;X;X;X;X;Phospho (STY);X;X;X;X;X;X;X;X;X;X;Phospho (STY);X;X;X;X	XXXXXXPPPPPPPPPPPPPXXXXXXXXXXXX	3.82e-102	163.18	149.52	_SQSFAGPVTS(ph)AGR_	SQSFAGPVT(0.026)S(0.974)AGR
gi|472584103	RHTO_01356	13	oligopeptide transporter	1	S	___MVNVRNPFRRQDSVDATTAPELHRNASD	X;X;X;X;X;X;X;X;X;X;X;X;X;X;X;Phospho (STY);X;X;X;X;X;X;X;X;X;X;X;X;X;X;X	XXXXXXXXXXXXPPPPPPPPPPPPPPPXXXX	5.61e-22	180.08	103.88	_QDS(ph)VDATTAPELHR_	QDS(1)VDATTAPELHR
gi|472581963	RHTO_04206	565	p21-activated kinase 1	1	S	EGPGSLPTSPDRRAPSPGEALYRSQSARASP;GGPGSLPTSPDRRAPSPGEALYRSQSARASP	X;X;X;X;Phospho (STY);X;X;Phospho (STY);Phospho (STY);X;X;X;X;X;X;Phospho (STY);X;X;X;X;X;X;X;X;X;Phospho (STY);X;X;X;Phospho (STY);X	XXXXXXXXXXXXPPPPPPPPPPPXXXXXXXX	0.000414059	136.26	136.26	_RAPS(ph)PGEALYR_	RAPS(1)PGEALYR
gi|472581963	RHTO_04206	480	p21-activated kinase 1	1	S	PGAEQDDVWDKFRKASGSAQGGQGPPGPGQG	X;X;X;X;X;X;X;X;X;X;X;X;X;X;X;Phospho (STY);X;X;X;X;X;X;X;X;X;X;X;X;X;X;X	XXXXXXXXXXXXXPPPPPPPPPPPPPPPPPP	2.12e-07	117.37	111.82	_KAS(ph)GSAQGGQGPPGPGQGNFEQPR_	KAS(0.833)GS(0.167)AQGGQGPPGPGQGNFEQPR
gi|472581963	RHTO_04206	482	p21-activated kinase 1	1	S	AEQDDVWDKFRKASGSAQGGQGPPGPGQGNF	X;X;X;X;X;X;X;X;X;X;X;X;X;X;X;Phospho (STY);X;X;X;X;X;X;X;X;X;X;X;X;X;X;X	XXXXXXXXXXXPPPPPPPPPPPPPPPPPPPP	1.19e-15	144.57	98.29	_KASGS(ph)AQGGQGPPGPGQGNFEQPR_	KAS(0.029)GS(0.971)AQGGQGPPGPGQGNFEQPR
gi|472581963	RHTO_04206	575	p21-activated kinase 1	1	S	DRRAPSPGEALYRSQSARASPTPPPSSAAAS	X;X;X;X;X;Phospho (STY);X;X;X;X;X;X;X;X;X;Phospho (STY);X;X;X;X;X;X;X;X;X;X;X;X;X;X;X	XXXXXXXXXXXXXPPPPPPPPPPPPPPPPPP	0.00844443	67.227	67.227	_SQS(ph)ARASPTPPPSSAAASTLNK_	S(0.027)QS(0.547)ARAS(0.399)PT(0.027)PPPSSAAASTLNK
gi|472581963	RHTO_04206	579	p21-activated kinase 1		S	PSPGEALYRSQSARASPTPPPSSAAASTLNK	X;Phospho (STY);X;X;X;X;X;X;X;X;X;X;X;X;X;Phospho (STY);X;X;X;X;X;X;X;X;X;X;X;X;X;X;X	XXXXXXXXXPPPPPPPPPPPPPPPPPPPPPP	0.00854525	67.194	67.194	_SQSARAS(ph)PTPPPSSAAASTLNK_	S(0.234)QS(0.234)ARAS(0.488)PT(0.044)PPPSSAAASTLNK
gi|472581952	RHTO_04195	153	smr domain containing protein		S	QAARFWPRSEAASLTSDDDGRPLEAGKLVWD	X;X;X;X;X;X;X;X;X;X;X;X;X;X;X;X;X;X;X;X;X;X;X;X;X;X;X;X;X;X;X	XXXXXXXXXXXXXXXXXXXXXXXXXXXXXXX	0.00900545	73.279	73.279	_SEAASLT(ph)SDDDGRPLEAGK_	SEAAS(0.291)LT(0.354)S(0.354)DDDGRPLEAGK
gi|472581940	RHTO_04183	355	phosphotyrosyl phosphatase activator	2;3	S	LSGEKTPSEILGRLPSPARTPPRSASPEEQR;LSGEKTPTEILERLPSPARTPPRSASPEEQR	X;X;X;X;X;X;X;X;X;X;X;X;X;X;X;Phospho (STY);X;X;X;Phospho (STY);X;X;X;Phospho (STY);X;Phospho (STY);X;X;X;X;X	XXXXXXXXXXXXXPPPPPPPPPPPPPPPPPP	0.00575421	148.41	148.41	_LPS(ph)PART(ph)PPR_	LPS(1)PART(1)PPR
gi|472581911	RHTO_04154	469	oxidative-stress responsive protein 1		S	WDFNPTVLHTPQRTTSSDDPFDGFSAAPSPL	X;X;X;X;X;X;X;X;X;X;X;X;X;X;X;Phospho (STY);X;X;X;X;X;X;X;X;X;X;X;X;X;X;X	XXXXXXXXXXXXXPPPPPPPPPPPPPPPPPP	1.78e-09	125.98	125.98	_TTS(ph)SDDPFDGFSAAPSPLHPR_	T(0.01)T(0.076)S(0.457)S(0.457)DDPFDGFSAAPSPLHPR
gi|472581911	RHTO_04154	470	oxidative-stress responsive protein 1	1	S	DFNPTVLHTPQRTTSSDDPFDGFSAAPSPLH	X;X;X;X;X;X;X;X;X;X;X;X;X;X;X;Phospho (STY);X;X;X;X;X;X;X;X;X;X;X;X;X;X;X	XXXXXXXXXXXXPPPPPPPPPPPPPPPPPPP	1.78e-09	125.98	71.428	_TTSS(ph)DDPFDGFSAAPSPLHPR_	T(0.16)T(0.16)S(0.137)S(0.542)DDPFDGFSAAPSPLHPR
gi|472581905	RHTO_04148	118	T-complex 11 family protein	1	S	SAGAAATGGRHSRTPSADLPRRIPTPSQPSP	X;X;X;X;X;X;X;X;X;X;X;X;X;X;X;Phospho (STY);X;X;X;X;X;X;X;X;X;X;X;X;X;X;X	XXXXXXXXXXXXXPPPPPPPPXXXXXXXXXX	0.0111679	79.974	79.974	_TPS(ph)ADLPR_	T(0.004)PS(0.996)ADLPR
gi|472581901	RHTO_04144	628	ARF guanyl-nucleotide exchange factor	2	S	TSRVAFAGSTAPLTPSPLSSPVKERLNPLST	X;X;X;X;X;X;X;X;X;X;X;X;X;X;X;Phospho (STY);X;X;Phospho (STY);Phospho (STY);X;X;X;X;X;X;X;X;X;X;X	XXXPPPPPPPPPPPPPPPPPPPPPPXXXXXX	1.73e-10	123.55	123.55	_VAFAGSTAPLTPS(ph)PLS(ph)SPVKER_	VAFAGSTAPLTPS(1)PLS(0.989)S(0.011)PVKER
gi|472581901	RHTO_04144	631	ARF guanyl-nucleotide exchange factor	2	S	VAFAGSTAPLTPSPLSSPVKERLNPLSTSSS	X;X;X;X;X;X;X;X;X;X;X;X;Phospho (STY);X;X;Phospho (STY);X;X;X;X;X;X;X;X;X;X;X;X;X;X;X	PPPPPPPPPPPPPPPPPPPPPPXXXXXXXXX	1.73e-10	123.55	123.55	_VAFAGSTAPLTPS(ph)PLS(ph)SPVKER_	VAFAGSTAPLTPS(1)PLS(0.989)S(0.011)PVKER
gi|472586892	RHTO_04569	497	zinc finger, C2H2-type domain containing protein	1	S	LELPFKDLGQPSRPASPALEEDGDEDDEGTC	X;X;X;X;X;X;X;X;X;X;X;X;X;X;X;Phospho (STY);X;X;X;X;X;X;X;X;X;X;X;X;X;X;X	XXXXXXPPPPPPPPPPPPPPPPPPPPPPPPP	7.4e-75	203.06	203.06	_DLGQPSRPAS(ph)PALEEDGDEDDEGTCK_	DLGQPSRPAS(1)PALEEDGDEDDEGTCK
gi|472583498	RHTO_02002	45	Paf1 family protein	1	S	NIPTGPQRYATYDFLSPIQGERELPLILDSE	X;X;X;X;X;X;X;X;X;X;X;X;X;X;X;Phospho (STY);X;X;X;X;X;X;X;X;X;X;X;X;X;X;X	XXXXXXXXPPPPPPPPPPPPPPXXXXXXXXX	0.00479411	83.966	83.966	_YATYDFLS(ph)PIQGER_	YATYDFLS(1)PIQGER
gi|472583546	RHTO_02050	554	DNA/RNA helicase, DEAD/DEAH box type	1	S	LREKVAAAAKSSRPGSGINTPALSESGASTP	X;X;X;X;X;X;X;X;X;X;X;X;X;X;X;Phospho (STY);X;X;X;X;X;X;X;X;X;X;X;X;Phospho (STY);X;X	XXXXXXXXXXPPPPPPPPPPPPPPPPPPPPP	3.26e-43	167.1	167.1	_SSRPGS(ph)GINTPALSESGASTPTGSEVGR_	S(0.147)S(0.147)RPGS(0.617)GINT(0.088)PALSESGASTPTGSEVGR
gi|472583546	RHTO_02050	562	DNA/RNA helicase, DEAD/DEAH box type	2	S	AKSSRPGSGINTPALSESGASTPTGSEVGRD	X;X;X;X;X;X;X;X;X;X;X;Phospho (STY);X;X;X;Phospho (STY);X;X;X;X;X;X;X;X;X;X;X;X;X;X;X	XXPPPPPPPPPPPPPPPPPPPPPPPPPPPPX	3.58e-16	128.12	101.3	_SSRPGSGINT(ph)PALS(ph)ESGASTPTGSEVGR_	S(0.001)S(0.002)RPGS(0.214)GINT(0.783)PALS(0.997)ES(0.003)GASTPTGSEVGR
gi|472583546	RHTO_02050	564	DNA/RNA helicase, DEAD/DEAH box type	2	S	SSRPGSGINTPALSESGASTPTGSEVGRDGS	X;X;X;X;X;X;X;X;X;X;X;X;X;X;X;Phospho (STY);X;X;Phospho (STY);Phospho (STY);X;Phospho (STY);X;X;X;X;X;X;X;X;X	PPPPPPPPPPPPPPPPPPPPPPPPPPPPPPP	1.56e-20	132.6	128.07	_SSRPGSGINTPALSES(ph)GAST(ph)PTGSEVGR_	SSRPGSGINTPALS(0.002)ES(0.926)GAS(0.1)T(0.894)PT(0.044)GS(0.034)EVGR
gi|472583546	RHTO_02050	567	DNA/RNA helicase, DEAD/DEAH box type	1;2	S	PGSGINTPALSESGASTPTGSEVGRDGSTTG	X;X;Phospho (STY);X;X;X;X;X;X;X;X;X;Phospho (STY);X;X;Phospho (STY);Phospho (STY);X;Phospho (STY);X;X;X;X;X;X;X;X;X;X;X;X	PPPPPPPPPPPPPPPPPPPPPPPPPPPPPPP	4.33e-182	241.82	163.75	_SSRPGSGINTPALSESGAS(ph)T(ph)PTGSEVGR_	SSRPGSGINTPALSES(0.001)GAS(0.993)T(0.904)PT(0.098)GS(0.004)EVGR
gi|472583546	RHTO_02050	572	DNA/RNA helicase, DEAD/DEAH box type	2	S	NTPALSESGASTPTGSEVGRDGSTTGGRGSK	X;X;X;X;X;X;X;X;X;X;X;Phospho (STY);X;X;X;Phospho (STY);X;X;X;X;X;X;X;X;X;X;X;X;X;X;X	PPPPPPPPPPPPPPPPPPPPPPPPPPPPXXX	1.37e-11	95.319	95.319	_SSRPGSGINTPALSESGAST(ph)PTGS(ph)EVGR_	SSRPGSGINTPALSES(0.006)GAS(0.195)T(0.69)PT(0.267)GS(0.842)EVGR
gi|472583566	RHTO_02070	59	NADH dehydrogenase (ubiquinone) Fe-S protein 7	1	S	NQVQASQAYDLAKVNSNQLSLETPRNGVEYA	X;X;X;X;X;X;X;X;X;X;X;X;X;X;X;Phospho (STY);X;X;X;X;X;X;X;X;X;X;X;X;X;X;X	XXXXXXXXXXXXXPPPPPPPPPPPPXXXXXX	0.00718628	151.59	151.59	_VNS(ph)NQLSLETPR_	VNS(1)NQLSLETPR
gi|472583615	RHTO_02119	229	protein of unknown function DUF1753, Golgi		S	PYRPRSRYQPNHTRNSSTGGPQYTHLRGNSL	X;Phospho (STY);X;X;X;X;X;X;X;X;X;X;X;X;X;Phospho (STY);X;X;X;X;X;X;X;X;X;X;X;X;X;Phospho (STY);X	XXXXXXXXXXXXXXPPPPPPPPPPPPPXXXX	0.00267409	91.657	91.657	_NS(ph)STGGPQYTHLR_	NS(0.333)S(0.333)T(0.333)GGPQYTHLR
gi|472583615	RHTO_02119	230	protein of unknown function DUF1753, Golgi	1	S	YRPRSRYQPNHTRNSSTGGPQYTHLRGNSLA	Phospho (STY);X;X;X;X;X;X;X;X;X;X;X;X;X;X;Phospho (STY);X;X;X;X;X;X;X;X;X;X;X;X;Phospho (STY);X;X	XXXXXXXXXXXXXPPPPPPPPPPPPPXXXXX	0.00248543	94.551	94.551	_NSS(ph)TGGPQYTHLR_	NS(0.134)S(0.862)T(0.004)GGPQYTHLR
gi|472583613	RHTO_02117	337	dynein intermediate chain, cytosolic	1	S	VDFLEQSSKVVQRALSDSYDYLRDYTITTDA	X;X;X;X;X;X;X;X;X;X;X;X;X;X;X;Phospho (STY);X;X;X;X;X;X;X;X;X;X;X;X;X;X;X	XXXXXXXXXXXXXPPPPPPPPPPXXXXXXXX	0.000757448	148.68	148.68	_ALS(ph)DSYDYLR_	ALS(1)DSYDYLR
gi|472583613	RHTO_02117	144	dynein intermediate chain, cytosolic	1	S	RGVGVGRERETVDAGSPGADNLRRSSGLGRS	X;X;X;X;X;X;X;X;X;X;X;X;X;X;X;Phospho (STY);X;X;X;X;X;X;X;X;X;X;X;X;X;X;X	XXXXXXXPPPPPPPPPPPPPPPPXXXXXXXX	2.73e-09	137.89	137.89	_ERETVDAGS(ph)PGADNLR_	ERET(0.001)VDAGS(0.999)PGADNLR
gi|472581520	RHTO_05201	29	ubiquitin carboxyl-terminal hydrolase 4/11/15	1;2	S	ASSPSLASLTRKRPLSSPVSTASAPKRANSE	X;X;X;X;X;X;X;X;X;X;X;X;X;X;X;Phospho (STY);Phospho (STY);X;X;X;X;X;X;X;X;X;X;X;X;Phospho (STY);X	XXXXXXXXXXXPPPPPPPPPPPPPPPXXXXX	3.07e-05	93.237	73.918	_KRPLS(ph)S(ph)PVSTASAPK_	KRPLS(1)S(1)PVSTASAPK
gi|472581520	RHTO_05201	30	ubiquitin carboxyl-terminal hydrolase 4/11/15	1;2	S	SSPSLASLTRKRPLSSPVSTASAPKRANSED	X;X;X;X;X;X;X;X;X;X;X;X;X;X;Phospho (STY);Phospho (STY);X;X;X;X;X;Phospho (STY);X;X;X;X;X;X;Phospho (STY);X;X	XXXXXXXXXXPPPPPPPPPPPPPPPXXXXXX	0.00584457	73.918	64.394	_KRPLS(ph)S(ph)PVSTASAPK_	KRPLS(1)S(1)PVSTASAPK
gi|472581520	RHTO_05201	43	ubiquitin carboxyl-terminal hydrolase 4/11/15	1;2	S	LSSPVSTASAPKRANSEDLMDQGASSDLEGS	X;Phospho (STY);Phospho (STY);X;X;X;X;X;Phospho (STY);X;X;X;X;X;X;Phospho (STY);X;X;X;Oxidation (M);X;X;X;X;Phospho (STY);X;X;X;X;X;X	XXXXXXXXXXXXPPPPPPPPPPPPPPPPPPP	2.96e-16	141.7	141.7	_RANS(ph)EDLM(ox)DQGAS(ph)SDLEGSIGASR_	RANS(1)EDLMDQGAS(0.5)S(0.5)DLEGSIGASR
gi|472581520	RHTO_05201	52	ubiquitin carboxyl-terminal hydrolase 4/11/15	2	S	APKRANSEDLMDQGASSDLEGSIGASRLNIA	X;X;X;X;X;X;Phospho (STY);X;X;X;Oxidation (M);X;X;X;X;Phospho (STY);X;X;X;X;X;X;X;X;X;X;X;X;X;X;X	XXXPPPPPPPPPPPPPPPPPPPPPPPPXXXX	2.96e-16	141.7	104.63	_RANS(ph)EDLM(ox)DQGAS(ph)SDLEGSIGASR_	RANS(1)EDLMDQGAS(0.578)S(0.422)DLEGSIGASR
gi|472581520	RHTO_05201	53	ubiquitin carboxyl-terminal hydrolase 4/11/15	1;2	S	PKRANSEDLMDQGASSDLEGSIGASRLNIAS	X;X;X;X;X;X;X;X;X;Oxidation (M);X;X;X;X;X;Phospho (STY);X;X;X;X;X;X;X;X;X;X;X;X;X;X;X	XXPPPPPPPPPPPPPPPPPPPPPPPPXXXXX	9.82e-44	176.57	176.57	_RANSEDLM(ox)DQGASS(ph)DLEGSIGASR_	RANSEDLMDQGAS(0.004)S(0.996)DLEGSIGASR
gi|472581501	RHTO_05182	475	RNA polymerase-associated protein LEO1	1;2	S	SQPKRGKGGPLARDYSDDDDGFLAKSDEEME	X;X;X;X;X;X;X;X;X;X;X;X;X;X;X;Phospho (STY);X;X;X;X;X;X;X;X;X;Phospho (STY);X;X;X;Oxidation (M);X	XXXXXXXPPPPPPPPPPPPPPPPPPPPPPPP	2.06e-24	109.05	83.826	_GGPLARDYS(ph)DDDDGFLAK_	GGPLARDY(0.001)S(0.999)DDDDGFLAK
gi|472581501	RHTO_05182	485	RNA polymerase-associated protein LEO1	2	S	LARDYSDDDDGFLAKSDEEMEVSGDEEEIEA	X;X;X;X;X;Phospho (STY);X;X;X;X;X;X;X;X;X;Phospho (STY);X;X;X;Oxidation (M);X;X;X;X;X;X;X;X;X;X;X	XXXPPPPPPPPPPPPPPPPPPPPPPPPPPPP	2.06e-24	109.05	109.05	_DYS(ph)DDDDGFLAKS(ph)DEEM(ox)EVSGDEEEIEAVDAAAEREER_	DY(0.113)S(0.888)DDDDGFLAKS(0.998)DEEMEVS(0.001)GDEEEIEAVDAAAEREER
gi|472581474	RHTO_05155	635	vacuolar amino acid transporter 1	2	S	KKREPGAPGMRKRRKSSVSAAAGGRYGALVA	X;X;X;X;X;X;X;X;X;X;X;X;X;X;X;Phospho (STY);Phospho (STY);X;X;X;X;X;X;X;X;X;X;X;X;X;X	XXXXXXXXXXXXXPPPPPPPPPPPPXXXXXX	0.0122936	83.54	83.54	_RKS(ph)S(ph)VSAAAGGR_	RKS(0.994)S(0.626)VS(0.38)AAAGGR
gi|472581474	RHTO_05155	636	vacuolar amino acid transporter 1	1;2	S	KREPGAPGMRKRRKSSVSAAAGGRYGALVAQ	X;X;X;X;X;X;X;X;X;X;X;X;X;X;Phospho (STY);Phospho (STY);X;X;X;X;X;X;X;X;X;X;X;X;X;X;X	XXXXXXXXXXXXPPPPPPPPPPPPXXXXXXX	0.000129434	144.8	130.47	_KSS(ph)VSAAAGGR_	KS(0.005)S(0.989)VS(0.005)AAAGGR
gi|472580633	RHTO_05948	469	conserved hypothetical protein	2	S	KITYREDDPPELPYQSDDSADGDFGTKKGRR	X;X;X;X;X;X;X;X;X;X;X;X;X;Phospho (STY);X;Phospho (STY);X;X;Phospho (STY);X;X;X;X;X;X;X;X;X;X;X;X	XPPPPPPPPPPPPPPPPPPPPPPPPPPPXXX	2.24e-13	131.33	131.33	_ITYREDDPPELPYQS(ph)DDS(ph)ADGDFGTK_	ITYREDDPPELPY(0.048)QS(0.939)DDS(0.998)ADGDFGT(0.015)K
gi|472580633	RHTO_05948	472	conserved hypothetical protein	2	S	YREDDPPELPYQSDDSADGDFGTKKGRRGRQ	X;X;X;X;X;X;X;X;X;X;X;X;Phospho (STY);X;X;Phospho (STY);X;X;X;X;X;X;X;X;X;X;X;X;X;X;X	PPPPPPPPPPPPPPPPPPPPPPPPPXXXXXX	2.24e-13	131.33	131.33	_ITYREDDPPELPYQS(ph)DDS(ph)ADGDFGTK_	ITYREDDPPELPY(0.048)QS(0.939)DDS(0.998)ADGDFGT(0.015)K
gi|472580657	RHTO_05972	864	actin patch protein		S	TPSTPLAPPKLRWRHSQSASDLASLVDEEKA	X;X;X;X;X;X;X;X;X;X;X;X;X;X;X;Phospho (STY);X;X;X;X;X;X;X;X;X;X;X;X;X;X;X	XXXXXXXXXXXXXXPPPPPPPPPPPPPPPPX	0.00249591	107.72	107.72	_HS(ph)QSASDLASLVDEEK_	HS(0.333)QS(0.333)AS(0.333)DLASLVDEEK
gi|472580657	RHTO_05972	866	actin patch protein		S	STPLAPPKLRWRHSQSASDLASLVDEEKARF	X;X;X;X;X;X;X;X;X;X;X;X;X;X;X;X;X;X;X;X;X;X;X;X;X;X;X;X;X;X;X	XXXXXXXXXXXXXXXXXXXXXXXXXXXXXXX	0.00249591	107.72	107.72	_HS(ph)QSASDLASLVDEEK_	HS(0.333)QS(0.333)AS(0.333)DLASLVDEEK
gi|472580657	RHTO_05972	868	actin patch protein	1	S	PLAPPKLRWRHSQSASDLASLVDEEKARFSA	X;X;X;X;X;X;X;X;X;X;X;X;X;X;X;Phospho (STY);X;X;X;X;X;X;X;X;X;X;X;X;X;X;X	XXXXXXXXXXPPPPPPPPPPPPPPPPXXXXX	5.65e-16	171.91	171.91	_HSQSAS(ph)DLASLVDEEK_	HS(0.065)QS(0.035)AS(0.9)DLASLVDEEK
gi|472580662	RHTO_05977	747	ARF guanyl-nucleotide exchange factor	1;2	S	GASSYHSPVMMRRDLSNSSLAHDPFPTQPRV	X;X;X;X;X;X;X;X;X;X;X;X;X;X;X;Phospho (STY);X;Phospho (STY);Phospho (STY);X;X;X;X;X;X;X;X;X;X;X;X	XXXXXXXXXXXXPPPPPPPPPPPPPPPPPPX	4.46e-07	129.43	124.63	_DLS(ph)NS(ph)SLAHDPFPTQPR_	DLS(1)NS(0.864)S(0.136)LAHDPFPTQPR
gi|472580662	RHTO_05977	749	ARF guanyl-nucleotide exchange factor	2	S	SSYHSPVMMRRDLSNSSLAHDPFPTQPRVPR	X;X;X;X;X;X;X;X;X;X;X;X;X;Phospho (STY);X;Phospho (STY);Phospho (STY);X;X;X;X;X;X;X;Phospho (STY);X;X;X;X;X;X	XXXXXXXXXXPPPPPPPPPPPPPPPPPPXXX	8.8e-07	124.63	78.285	_DLSNS(ph)S(ph)LAHDPFPTQPR_	DLS(0.49)NS(0.941)S(0.569)LAHDPFPTQPR
gi|472580662	RHTO_05977	750	ARF guanyl-nucleotide exchange factor	2	S	SYHSPVMMRRDLSNSSLAHDPFPTQPRVPRL	X;X;X;X;X;X;X;X;X;X;X;X;Phospho (STY);X;Phospho (STY);Phospho (STY);X;X;X;X;X;X;X;X;X;X;X;X;X;X;X	XXXXXXXXXPPPPPPPPPPPPPPPPPPXXXX	4.46e-07	129.43	129.43	_DLS(ph)NSS(ph)LAHDPFPTQPR_	DLS(0.936)NS(0.066)S(0.998)LAHDPFPTQPR
gi|472580662	RHTO_05977	1341	ARF guanyl-nucleotide exchange factor	1	S	GGSFSGSTGERQRVGSLTPAAAAAAAAAKMQ;GGSFSGSVGERQRVGSLTPAAAAAAAAAKMQ	X;X;X;X;X;X;X;X;X;X;X;X;X;X;X;Phospho (STY);X;X;X;X;X;X;X;X;X;X;X;X;X;X;X	XXXXXXXXXXXXXPPPPPPPPPPPPPPPPXX	0.00240836	108.17	108.17	_VGS(ph)LTPAAAAAAAAAK_	VGS(0.5)LT(0.5)PAAAAAAAAAK
gi|472582860	RHTO_03450	619	3-phosphoinositide dependent protein kinase-1	1	S	DGHPLDDPMGRPRTRSFVGTPEYVSPEILSE	X;X;X;X;X;X;X;X;X;X;X;X;X;X;X;Phospho (STY);X;X;X;X;X;X;X;X;X;X;X;X;X;X;X	XXXXXXXXXXXXXXXPPPPPPPPPPPPPPPP	0.00101322	106.42	106.42	_S(ph)FVGTPEYVSPEILSEGR_	S(0.997)FVGT(0.003)PEYVSPEILSEGR
gi|472582837	RHTO_03427	724	SNF4 family helicase/atpase	2	S	MMDEAQMLGDAVGPTSETASLVSRRYSWAVT	Oxidation (M);Oxidation (M);X;X;X;X;Oxidation (M);X;X;X;X;X;X;X;Phospho (STY);Phospho (STY);X;X;X;X;X;X;X;X;X;X;X;X;X;X;X	PPPPPPPPPPPPPPPPPPPPPPPPPXXXXXX	0.00123424	70.452	70.452	_VM(ox)M(ox)DEAQM(ox)LGDAVGPT(ph)S(ph)ETASLVSRR_	VMMDEAQMLGDAVGPT(0.861)S(0.861)ET(0.275)AS(0.002)LVS(0.001)RR
gi|472582811	RHTO_03401	90	zinc finger, RING-CH-type protein	1	S	DPVRLALPRPPQRTVSIDTAGERTCWICYAT	X;X;X;X;X;X;X;X;X;X;X;X;X;X;X;Phospho (STY);X;X;X;X;X;X;X;X;X;X;X;X;X;X;X	XXXXXXXXXXXXXPPPPPPPPPPXXXXXXXX	4.38e-05	158.01	113.69	_TVS(ph)IDTAGER_	TVS(1)IDTAGER
gi|472582784	RHTO_03374	1209	U3 small nucleolar RNA-associated protein 10		S	AVSPPATKGAKRGRTSLAGAASTTSRTERIP	X;X;X;X;X;X;X;X;X;X;X;X;X;X;X;X;X;X;X;X;X;X;X;X;X;X;X;X;X;X;X	XXXXXXXXXXXXXXXXXXXXXXXXXXXXXXX	0.00741716	107.65	107.65	_GRT(ph)SLAGAASTTSR_	GRT(0.491)S(0.491)LAGAAS(0.009)T(0.009)TSR
gi|472582762	RHTO_03352	982	guanine nucleotide exchange factor LTE1	1	S	DRRESVRIELDDLDDSDEDEDVIEAKRTLKR	X;X;X;X;X;X;X;X;X;X;X;X;X;X;X;Phospho (STY);X;X;X;X;X;X;X;X;X;X;X;X;X;X;X	XXXXXXXPPPPPPPPPPPPPPPPPPPPXXXX	1.64e-09	123.02	88.945	_IELDDLDDS(ph)DEDEDVIEAKR_	IELDDLDDS(1)DEDEDVIEAKR
gi|472582762	RHTO_03352	434	guanine nucleotide exchange factor LTE1		S	QHGRLPSSASLASARSSGSHASGQQITVVPA	X;X;X;X;X;X;X;X;X;X;X;X;X;X;X;Phospho (STY);X;X;X;X;X;X;X;X;X;X;X;X;X;X;X	XXXXXXXXXXXXXXXPPPPPPPPPPPPPPPP	0.00191241	70.413	70.413	_S(ph)SGSHASGQQITVVPAAGDDPR_	S(0.25)S(0.25)GS(0.25)HAS(0.25)GQQIT(0.002)VVPAAGDDPR
gi|472582762	RHTO_03352	435	guanine nucleotide exchange factor LTE1		S	HGRLPSSASLASARSSGSHASGQQITVVPAA	X;X;X;X;X;X;X;X;X;X;X;X;X;X;X;X;X;X;X;X;X;X;X;X;X;X;X;X;X;X;X	XXXXXXXXXXXXXXXXXXXXXXXXXXXXXXX	0.00191241	70.413	70.413	_S(ph)SGSHASGQQITVVPAAGDDPR_	S(0.25)S(0.25)GS(0.25)HAS(0.25)GQQIT(0.002)VVPAAGDDPR
gi|472582762	RHTO_03352	437	guanine nucleotide exchange factor LTE1		S	RLPSSASLASARSSGSHASGQQITVVPAAGD	X;X;X;X;X;X;X;X;X;X;X;X;X;X;X;Phospho (STY);X;X;X;X;X;X;X;X;X;X;X;X;X;X;X	XXXXXXXXXXXXPPPPPPPPPPPPPPPPPPP	0.00191241	70.413	63.63	_SSGS(ph)HASGQQITVVPAAGDDPR_	S(0.235)S(0.235)GS(0.265)HAS(0.265)GQQIT(0.001)VVPAAGDDPR
gi|472582762	RHTO_03352	440	guanine nucleotide exchange factor LTE1		S	SSASLASARSSGSHASGQQITVVPAAGDDPR	X;X;X;X;X;X;X;X;X;X;X;X;X;X;X;X;X;X;X;X;X;X;X;X;X;X;X;X;X;X;X	XXXXXXXXXXXXXXXXXXXXXXXXXXXXXXX	0.00191241	70.413	63.63	_SSGS(ph)HASGQQITVVPAAGDDPR_	S(0.235)S(0.235)GS(0.265)HAS(0.265)GQQIT(0.001)VVPAAGDDPR
gi|472582750	RHTO_03340	156	C6 transcription factor (Mut3)	1	S	ESNVAAAPSNEDDGLSSPSHRLAILPPEGQP	X;X;X;X;X;X;X;X;X;X;X;X;X;X;X;Phospho (STY);X;X;X;X;X;X;X;X;X;X;X;X;X;X;X	PPPPPPPPPPPPPPPPPPPPPXXXXXXXXXX	1.3e-14	138.78	138.78	_VWTESNVAAAPSNEDDGLS(ph)SPSHR_	VWTESNVAAAPSNEDDGLS(0.785)S(0.176)PS(0.04)HR
gi|472582750	RHTO_03340	157	C6 transcription factor (Mut3)	1	S	SNVAAAPSNEDDGLSSPSHRLAILPPEGQPD	X;X;X;X;X;X;X;X;X;X;X;X;X;X;X;Phospho (STY);X;X;X;X;X;X;X;X;X;X;X;X;X;X;X	PPPPPPPPPPPPPPPPPPPPXXXXXXXXXXX	1.42e-23	155.39	155.39	_VWTESNVAAAPSNEDDGLSS(ph)PSHR_	VWTESNVAAAPSNEDDGLS(0.165)S(0.67)PS(0.165)HR
gi|472582745	RHTO_03335	463	Fps/Fes/Fer/CIP4 homology and SAFF domain protein	1	S	GGSLFRRPSRAGTQLSDFDERAGASSSPQYA;GSSLFRRPSRAGTQLSDFDERAGNSSAPQYA	X;X;X;X;X;X;X;X;X;X;X;X;X;X;X;Phospho (STY);X;X;X;X;X;X;X;X;X;X;X;X;X;X;X	XXXXXXPPPPPPPPPPPPPPPXXXXXXXXXX	6.88e-16	181.58	181.58	_AGTQLS(ph)DFDER_	AGTQLS(1)DFDER
gi|472582745	RHTO_03335	374	Fps/Fes/Fer/CIP4 homology and SAFF domain protein		S	GKLSSFLGGSKARDRSSSIPNSAKYASFSTP	X;X;X;X;X;X;X;X;X;X;X;X;X;X;X;Phospho (STY);X;X;X;X;X;X;X;X;X;X;Phospho (STY);X;X;X;X	XXXXXXXXXXXXXPPPPPPPPPPPXXXXXXX	0.0132135	106.58	106.58	_DRS(ph)SSIPNSAK_	DRS(0.333)S(0.333)S(0.333)IPNSAK
gi|472582745	RHTO_03335	375	Fps/Fes/Fer/CIP4 homology and SAFF domain protein		S	KLSSFLGGSKARDRSSSIPNSAKYASFSTPN;KLSSFLGGSKARDRSSSIPNSAKYASFSTPS	X;X;X;X;X;X;X;X;X;X;X;X;X;X;X;X;X;X;X;X;X;X;X;X;X;Phospho (STY);X;X;X;X;X	XXXXXXXXXXXXXXXXXXXXXXXXXXXXXXX	0.0132135	106.58	106.58	_DRS(ph)SSIPNSAK_	DRS(0.333)S(0.333)S(0.333)IPNSAK
gi|472582745	RHTO_03335	376	Fps/Fes/Fer/CIP4 homology and SAFF domain protein	1	S	LSSFLGGSKARDRSSSIPNSAKYASFSTPND;LSSFLGGSKARDRSSSIPNSAKYASFSTPSD	X;X;X;X;X;X;X;X;X;X;X;X;X;X;X;Phospho (STY);X;X;X;X;X;X;X;X;Phospho (STY);X;X;X;X;X;X	XXXXXXXXXXXPPPPPPPPPPPXXXXXXXXX	8.47e-32	190.03	190.03	_DRSSS(ph)IPNSAK_	DRS(0.006)S(0.006)S(0.988)IPNSAK
gi|472582745	RHTO_03335	456	Fps/Fes/Fer/CIP4 homology and SAFF domain protein	1;2	S	KRKSLMPGGSLFRRPSRAGTQLSDFDERAGA;KRKSLMPGSSLFRRPSRAGTQLSDFDERAGN	X;X;X;X;X;X;X;X;X;X;X;X;X;X;X;Phospho (STY);X;X;X;Phospho (STY);X;X;Phospho (STY);X;X;X;X;X;X;X;X	XXXXXXXXXXXXXPPPPPPPPPPPPPPPXXX	6.5e-08	156.51	145	_RPS(ph)RAGT(ph)QLSDFDER_	RPS(1)RAGT(1)QLSDFDER
gi|472582730	RHTO_03320	558	hypothetical protein	1	S	DVRKRDETPSGTTTASV______________	X;X;X;X;X;X;X;X;X;X;X;X;X;X;X;Phospho (STY);X;X;X;X;X;X;X;X;X;X;X;X;X;X;X	XXXPPPPPPPPPPPPPPXXXXXXXXXXXXXX	6.61e-06	147.7	147.7	_KRDETPSGTTTAS(ph)V_	KRDETPSGTTTAS(1)V
gi|472582721	RHTO_03311	169	programmed cell death protein 2	2	S	DQDADLSKAISLSMASLGSTDEQAVSEVEKI;DQDAELSKAISLSMASLGSTDEQAVSEVEKI	X;X;X;X;X;X;X;X;X;X;X;X;X;X;X;Phospho (STY);X;X;Phospho (STY);X;X;X;X;X;X;X;X;X;X;X;X	XXXXXXXXPPPPPPPPPPPPPPPPPPPPPPX	1.26e-18	146.78	134.21	_AISLSMAS(ph)LGS(ph)TDEQAVSEVEK_	AIS(0.001)LS(0.001)MAS(0.998)LGS(0.955)T(0.045)DEQAVSEVEK
gi|472582721	RHTO_03311	172	programmed cell death protein 2	2	S	ADLSKAISLSMASLGSTDEQAVSEVEKIKPE;AELSKAISLSMASLGSTDEQAVSEVEKIKPE	X;X;X;X;X;X;X;X;X;X;Oxidation (M);X;Phospho (STY);X;X;Phospho (STY);X;X;X;X;X;X;X;X;X;X;X;X;X;X;X	XXXXXPPPPPPPPPPPPPPPPPPPPPPXXXX	1.26e-18	146.78	134.21	_AISLSMAS(ph)LGS(ph)TDEQAVSEVEK_	AIS(0.001)LS(0.001)MAS(0.998)LGS(0.955)T(0.045)DEQAVSEVEK
gi|472582716	RHTO_03306	690	MYB DNA binding protein	2	S	SLLERQADAEKIAFDSQSQSASPAPPPPKKS	X;X;X;X;X;X;X;X;X;X;X;X;X;X;X;Phospho (STY);X;X;X;X;X;Phospho (STY);X;X;X;X;X;X;X;X;X	XXXXXXXXXXXPPPPPPPPPPPPPPPPPPPX	0.00194759	92.034	84.859	_IAFDS(ph)QSQSAS(ph)PAPPPPKK_	IAFDS(0.934)QS(0.186)QS(0.141)AS(0.738)PAPPPPKK
gi|472582716	RHTO_03306	694	MYB DNA binding protein		S	RQADAEKIAFDSQSQSASPAPPPPKKSKSKS;RQADAEKIAFDSQSQSASPAPPPPKKSQTKS	X;X;X;X;X;X;X;X;X;X;X;X;X;X;X;Phospho (STY);X;X;X;X;X;X;X;X;X;X;X;X;X;X;X	XXXXXXXPPPPPPPPPPPPPPPPPPPXXXXX	0.0101433	60.939	60.939	_IAFDSQSQS(ph)ASPAPPPPKK_	IAFDS(0.099)QS(0.35)QS(0.488)AS(0.064)PAPPPPKK
gi|472582716	RHTO_03306	696	MYB DNA binding protein	1;2	S	ADAEKIAFDSQSQSASPAPPPPKKSKSKSAS;ADAEKIAFDSQSQSASPAPPPPKKSQTKSAS	X;X;X;X;X;X;X;X;X;Phospho (STY);X;X;X;X;X;Phospho (STY);X;X;X;X;X;X;X;X;X;X;X;X;X;X;X	XXXXXPPPPPPPPPPPPPPPPPPPXXXXXXX	0.00180538	92.034	92.034	_IAFDS(ph)QSQSAS(ph)PAPPPPKK_	IAFDS(0.748)QS(0.247)QS(0.04)AS(0.965)PAPPPPKK
gi|472582716	RHTO_03306	1071	MYB DNA binding protein	2;3	S	KTLPQGPRPNETDDESSE_____________	X;X;X;X;X;X;X;X;X;X;X;Phospho (STY);X;X;X;Phospho (STY);Phospho (STY);X;X;X;X;X;X;X;X;X;X;X;X;X;X	XPPPPPPPPPPPPPPPPPXXXXXXXXXXXXX	2.02e-110	258.83	188.07	_TLPQGPRPNETDDES(ph)S(ph)E_	TLPQGPRPNETDDES(1)S(1)E
gi|472582716	RHTO_03306	1072	MYB DNA binding protein	2;3	S	TLPQGPRPNETDDESSE______________	X;X;X;X;X;X;X;X;X;X;Phospho (STY);X;X;X;Phospho (STY);Phospho (STY);X;X;X;X;X;X;X;X;X;X;X;X;X;X;X	PPPPPPPPPPPPPPPPPXXXXXXXXXXXXXX	2.02e-110	258.83	188.07	_TLPQGPRPNETDDES(ph)S(ph)E_	TLPQGPRPNETDDES(1)S(1)E
gi|472582437	RHTO_03657	264	protein tyrosine phosphatase		S	PVTPKKTGVAPKDITSAVTPENVLPEALGAT	X;X;X;X;X;X;X;X;X;X;X;X;X;X;X;X;X;X;X;X;X;X;X;X;X;X;X;X;X;X;X	XXXXXXXXXXXXXXXXXXXXXXXXXXXXXXX	0.000812836	85.087	85.087	_DIT(ph)SAVTPENVLPEALGATPAR_	DIT(0.354)S(0.354)AVT(0.292)PENVLPEALGATPAR
gi|472582474	RHTO_03694	414	Ste12-like transcription factor	1	S	PRTRATHFPRQQRLASPLQIPSSAPVDQGRF	X;X;X;X;X;X;X;X;X;X;X;X;X;X;X;Phospho (STY);X;X;X;X;X;X;X;X;X;X;X;X;X;X;X	XXXXXXXXXXXXXPPPPPPPPPPPPPPPPPX	0.00155249	103.6	97.767	_LAS(ph)PLQIPSSAPVDQGR_	LAS(1)PLQIPSSAPVDQGR
gi|472582474	RHTO_03694	627	Ste12-like transcription factor	1	S	PKHLVSAIHPRYRQTSPPTPSDSPDKPRRLH	X;X;X;X;X;X;X;X;X;X;X;X;X;X;X;Phospho (STY);X;X;X;X;X;X;X;X;X;X;X;X;X;X;X	XXXXXXXXXXXXXPPPPPPPPPPPPPPPXXX	0.000369058	132.74	132.74	_QTS(ph)PPTPSDSPDKPR_	QT(0.027)S(0.839)PPT(0.114)PS(0.016)DS(0.003)PDKPR
gi|472582416	RHTO_03635	482	protein of GDPGTP exchange factor Sec2p family		S	ASSGSLQPPAMKRSDSGSSHLSTATTNTFVS;VSSGSLQPPTMKRSDSGSSHLSTATTNTFVS	X;X;X;X;X;X;X;X;X;X;X;X;X;X;X;Phospho (STY);X;X;X;X;X;X;X;X;X;X;X;X;X;X;X	XXXXXXXXXXXXXPPPPPPPPPPPPPPPPPP	0.000455584	108.75	108.75	_SDS(ph)GSSHLSTATTNTFVSAR_	S(0.059)DS(0.314)GS(0.314)S(0.314)HLSTATTNTFVSAR
gi|472582416	RHTO_03635	484	protein of GDPGTP exchange factor Sec2p family		S	SGSLQPPAMKRSDSGSSHLSTATTNTFVSAR;SGSLQPPTMKRSDSGSSHLSTATTNTFVSAR	X;X;X;X;X;X;X;X;X;X;X;X;X;X;X;X;X;X;X;X;X;X;X;X;X;X;X;X;X;X;X	XXXXXXXXXXXXXXXXXXXXXXXXXXXXXXX	0.000455584	108.75	108.75	_SDS(ph)GSSHLSTATTNTFVSAR_	S(0.059)DS(0.314)GS(0.314)S(0.314)HLSTATTNTFVSAR
gi|472582416	RHTO_03635	485	protein of GDPGTP exchange factor Sec2p family		S	GSLQPPAMKRSDSGSSHLSTATTNTFVSARS;GSLQPPTMKRSDSGSSHLSTATTNTFVSARS	X;X;X;X;X;X;X;X;X;X;X;X;X;X;X;X;X;X;X;X;X;X;X;X;X;X;X;X;X;X;X	XXXXXXXXXXXXXXXXXXXXXXXXXXXXXXX	0.000455584	108.75	108.75	_SDS(ph)GSSHLSTATTNTFVSAR_	S(0.059)DS(0.314)GS(0.314)S(0.314)HLSTATTNTFVSAR
gi|472582413	RHTO_03632	956	serine/threonine protein kinase Kin4	2	S	LAAMPRKRKSSGSPASSLNPDPAPALPQPPT	X;X;X;X;X;X;X;X;X;X;X;X;X;X;X;Phospho (STY);Phospho (STY);X;X;X;X;X;X;X;X;X;X;X;X;X;X	XXXXXXXPPPPPPPPPPPPPPPPPPPPPPPP	0.0065833	59.661	59.661	_RKSSGSPAS(ph)S(ph)LNPDPAPALPQPPTVAEEAAK_	RKS(0.12)S(0.12)GS(0.267)PAS(0.747)S(0.747)LNPDPAPALPQPPTVAEEAAK
gi|472582413	RHTO_03632	957	serine/threonine protein kinase Kin4	2	S	AAMPRKRKSSGSPASSLNPDPAPALPQPPTV	X;X;X;X;X;X;X;X;X;X;X;X;X;X;Phospho (STY);Phospho (STY);X;X;X;X;X;X;X;X;X;X;X;X;X;X;X	XXXXXXPPPPPPPPPPPPPPPPPPPPPPPPP	0.0065833	59.661	59.661	_RKSSGSPAS(ph)S(ph)LNPDPAPALPQPPTVAEEAAK_	RKS(0.12)S(0.12)GS(0.267)PAS(0.747)S(0.747)LNPDPAPALPQPPTVAEEAAK
gi|472582413	RHTO_03632	1365	serine/threonine protein kinase Kin4	1	S	SRKKAMATSAIQRSASSSNVNALDRRLSLTN	X;X;X;X;X;X;X;X;X;X;X;X;X;X;X;Phospho (STY);X;X;X;X;X;X;X;X;X;X;X;X;X;X;X	XXXXXXXXXXXXXPPPPPPPPPPPPPXXXXX	0.0131949	64.04	64.04	_SAS(ph)SSNVNALDRR_	S(0.174)AS(0.593)S(0.14)S(0.093)NVNALDRR
gi|472580319	RHTO_06677	1317	DNA topoisomerase II	1	S	KSAGKGTAKKRAAYASDDDDDFEVKPKKKAP	X;X;X;X;X;X;X;X;X;X;X;X;X;X;X;Phospho (STY);X;X;X;X;X;X;X;X;X;X;X;X;X;X;X	XXXXXXXXXXPPPPPPPPPPPPPPPPPXXXX	1.95e-111	267.36	238.8	_AAYAS(ph)DDDDDFEVKPK_	AAYAS(1)DDDDDFEVKPK
gi|472585021	RHTO_07940	677	signal transducer		S	AELTVLGEETGAPDRSSLASTQDEVAEALNS	X;X;X;X;X;X;X;X;X;X;X;X;X;X;X;Phospho (STY);X;X;X;X;X;X;X;X;X;X;X;X;X;X;X	XXXXXXXXXXXXXXXPPPPPPPPPPPPPPPP	1.24e-07	132.84	132.84	_S(ph)SLASTQDEVAEALNSR_	S(0.347)S(0.347)LAS(0.258)T(0.048)QDEVAEALNSR
gi|472585021	RHTO_07940	678	signal transducer		S	ELTVLGEETGAPDRSSLASTQDEVAEALNSR	X;X;X;X;X;X;X;X;X;X;X;X;X;X;X;X;X;X;X;X;X;X;X;X;X;X;X;X;X;X;X	XXXXXXXXXXXXXXXXXXXXXXXXXXXXXXX	1.24e-07	132.84	132.84	_S(ph)SLASTQDEVAEALNSR_	S(0.347)S(0.347)LAS(0.258)T(0.048)QDEVAEALNSR
gi|472585021	RHTO_07940	681	signal transducer		S	VLGEETGAPDRSSLASTQDEVAEALNSRLEA	X;X;X;X;X;X;X;X;X;X;X;X;X;X;X;X;X;X;X;X;X;X;X;X;X;X;X;X;X;X;X	XXXXXXXXXXXXXXXXXXXXXXXXXXXXXXX	9e-07	123.29	123.29	_S(ph)SLASTQDEVAEALNSR_	S(0.25)S(0.25)LAS(0.25)T(0.25)QDEVAEALNSR
gi|472585021	RHTO_07940	231	signal transducer	1	S	SHVRPLPPSPYHRSTSFDSTQHQRSLTNSSD;SPVRPLPPSPYHRSTSFDSTQHQRSLTNSSD	X;X;X;X;X;X;X;X;X;X;X;X;X;X;X;Phospho (STY);X;X;X;X;X;X;X;X;X;X;X;X;X;X;X	XXXXXXXXXXXXXPPPPPPPPPPPXXXXXXX	0.000638142	136.3	96.464	_STS(ph)FDSTQHQR_	ST(0.003)S(0.995)FDS(0.001)T(0.001)QHQR
gi|472585035	RHTO_07954	13	60S ribosomal protein l3	1	S	SVRMSHRKYEHPRCGSLGFLPRKRAARHRGK	X;X;X;X;X;X;X;X;X;X;X;X;X;X;X;Phospho (STY);X;X;X;X;X;X;X;X;X;X;X;X;X;X;X	XXXXXXXXXXXXXPPPPPPPPPXXXXXXXXX	0.000251662	119.27	106.67	_CGS(ph)LGFLPR_	CGS(1)LGFLPR
gi|472585078	RHTO_07997	35	nucleobase transmembrane transporter	1	S	GAATAPHLESGAEVVSAHDGVNRDKGVIGWL	X;X;X;X;X;X;X;X;X;X;X;X;X;X;X;Phospho (STY);X;X;X;X;X;X;X;X;X;X;X;X;X;X;X	PPPPPPPPPPPPPPPPPPPPPPPXXXXXXXX	2.73e-14	136.34	136.34	_GAATAPHLESGAEVVS(ph)AHDGVNR_	GAATAPHLESGAEVVS(1)AHDGVNR
gi|472585099	RHTO_08018	716	pre-rRNA-processing protein ESF1	1	S	KANAEEQAKLALLVGSDDEDDVLGDDAAGEG	X;X;X;X;X;X;X;X;X;X;X;X;X;X;X;Phospho (STY);X;X;X;X;X;X;X;X;X;X;X;X;X;X;X	XXXXXXXXXPPPPPPPPPPPPPPPPPPPPPP	1.58e-120	252.83	119.28	_LALLVGS(ph)DDEDDVLGDDAAGEGGR_	LALLVGS(1)DDEDDVLGDDAAGEGGR
gi|472585100	RHTO_08019	226	BDF1	1	S	AEFAAGAGSGDVKEGSPGVSVQAADDGPANP	X;X;X;X;X;X;X;X;X;X;X;X;X;X;X;Phospho (STY);X;X;X;X;X;X;X;X;X;X;X;X;X;X;X	XXXXXXXXXXXXXPPPPPPPPPPPPPPPPPP	2.02e-19	138.61	138.61	_EGS(ph)PGVSVQAADDGPANPVPPTQGGTLKR_	EGS(1)PGVSVQAADDGPANPVPPTQGGTLKR
gi|472585100	RHTO_08019	230	BDF1	1	S	AGAGSGDVKEGSPGVSVQAADDGPANPVPPT	X;X;X;X;X;X;X;X;X;X;X;X;X;X;X;X;X;X;X;X;X;X;X;X;X;X;X;X;X;X;X	XXXXXXXXXXXXXXXXXXXXXXXXXXXXXXX	4.93e-10	102.07	102.07	_EGS(ph)PGVSVQAADDGPANPVPPTQGGTLKR_	EGS(0.5)PGVS(0.5)VQAADDGPANPVPPTQGGTLKR
gi|472585100	RHTO_08019	942	BDF1	1	S	GGGQRKPKRPKHDDDSDDYYEDDGGAYYGGG	X;X;X;X;X;X;X;X;X;X;X;X;X;X;X;Phospho (STY);X;X;X;X;X;X;X;X;X;X;X;X;X;X;X	XXXXXXXXXXXPPPPPPPPPPPPPPPPPPPP	0.0127323	61.524	61.524	_HDDDS(ph)DDYYEDDGGAYYGGGGSSSSR_	HDDDS(0.936)DDY(0.032)Y(0.032)EDDGGAYYGGGGSSSSR
gi|472585116	RHTO_08035	72	arrestin domain protein	1;2	S	HSPARLFSNSRAASLSRPGSRAASPAPPLSR	X;X;X;X;X;X;X;X;X;X;X;X;X;X;X;Phospho (STY);X;X;X;Phospho (STY);X;X;X;Phospho (STY);X;X;X;X;X;X;X	XXXXXXXXXXXPPPPPPPPPPXXXXXXXXXX	0.00107275	133.48	133.48	_AASLS(ph)RPGS(ph)R_	AASLS(1)RPGS(1)R
gi|472585116	RHTO_08035	76	arrestin domain protein	2	S	RLFSNSRAASLSRPGSRAASPAPPLSRAAIP	X;X;X;X;X;X;X;X;X;X;X;Phospho (STY);X;X;X;Phospho (STY);X;X;X;Phospho (STY);X;X;X;X;X;X;X;X;X;X;X	XXXXXXXPPPPPPPPPPXXXXXXXXXXXXXX	0.00107275	133.48	115.1	_AASLS(ph)RPGS(ph)R_	AAS(0.001)LS(0.999)RPGS(1)R
gi|472585116	RHTO_08035	80	arrestin domain protein	1	S	NSRAASLSRPGSRAASPAPPLSRAAIPQGDD	X;X;X;X;X;X;X;Phospho (STY);X;X;X;Phospho (STY);X;X;X;Phospho (STY);X;X;X;X;X;X;X;X;X;X;X;X;X;X;X	XXXXXXXXXXXXXPPPPPPPPPPXXXXXXXX	0.00533692	100.22	100.22	_AAS(ph)PAPPLSR_	AAS(1)PAPPLSR
gi|472585116	RHTO_08035	365	arrestin domain protein	1	S	PAQLAFRNSSRQFDRSPTPSRSPLATANPII	X;X;X;X;X;X;X;X;X;X;X;X;X;X;X;Phospho (STY);X;X;X;X;X;X;X;X;X;X;X;X;X;X;X	XXXXXXXXXXXPPPPPPPPPPXXXXXXXXXX	0.00868323	115.57	115.57	_QFDRS(ph)PTPSR_	QFDRS(0.958)PT(0.041)PS(0.001)R
gi|472585116	RHTO_08035	369	arrestin domain protein		S	AFRNSSRQFDRSPTPSRSPLATANPIISPST	X;X;X;X;X;X;X;X;X;X;X;X;X;X;X;Phospho (STY);X;X;X;X;X;X;X;X;X;X;X;Phospho (STY);X;Phospho (STY);Phospho (STY)	XXXXXXXXXXXPPPPPPPPPPPPPPPPPPPP	0.00120558	78.354	78.354	_SPTPS(ph)RSPLATANPIISPS(ph)TSNHDLR_	S(0.013)PT(0.063)PS(0.308)RS(0.308)PLAT(0.308)ANPIIS(0.027)PS(0.324)T(0.324)S(0.324)NHDLR
gi|472585116	RHTO_08035	521	arrestin domain protein	1	S	QPPAPSASSERGRRASTSSNATARRVSSSDR	X;X;X;X;X;X;X;X;X;X;X;X;X;X;X;Phospho (STY);X;X;X;X;X;X;X;X;X;X;Phospho (STY);X;X;X;X	XXXXXXXXXXXXXPPPPPPPPPPPXXXXXXX	0.0119558	69.258	69.258	_RAS(ph)TSSNATAR_	RAS(0.968)T(0.014)S(0.014)S(0.003)NATAR
gi|472585116	RHTO_08035	371	arrestin domain protein		S	RNSSRQFDRSPTPSRSPLATANPIISPSTSN	X;X;X;X;X;X;X;X;X;Phospho (STY);X;X;X;X;X;X;X;X;X;X;X;X;X;X;X;X;X;X;X;X;X	XXXXXXXXXXXXXXXXXXXXXXXXXXXXXXX	0.00120558	78.354	78.354	_SPTPS(ph)RSPLATANPIISPS(ph)TSNHDLR_	S(0.013)PT(0.063)PS(0.308)RS(0.308)PLAT(0.308)ANPIIS(0.027)PS(0.324)T(0.324)S(0.324)NHDLR
gi|472585116	RHTO_08035	381	arrestin domain protein	1;2	S	PTPSRSPLATANPIISPSTSNHDLRLNRTST	X;X;X;X;X;X;X;X;X;X;X;X;X;X;X;Phospho (STY);X;Phospho (STY);Phospho (STY);Phospho (STY);X;X;X;X;X;X;X;X;X;X;X	XXXXXPPPPPPPPPPPPPPPPPPPPXXXXXX	0.00140164	95.122	88.627	_SPLATANPIIS(ph)PSTS(ph)NHDLR_	SPLATANPIIS(0.999)PS(0.016)T(0.061)S(0.924)NHDLR
gi|472585116	RHTO_08035	383	arrestin domain protein		S	PSRSPLATANPIISPSTSNHDLRLNRTSTGA	X;Phospho (STY);X;X;X;X;X;X;X;X;X;X;X;Phospho (STY);X;Phospho (STY);X;X;X;X;X;X;X;X;X;X;X;X;X;X;X	PPPPPPPPPPPPPPPPPPPPPPPXXXXXXXX	1.85e-58	221.14	76.151	_SPLATANPIIS(ph)PS(ph)TSNHDLR_	SPLATANPIIS(0.988)PS(0.337)T(0.337)S(0.337)NHDLR
gi|472585116	RHTO_08035	385	arrestin domain protein	1;2	S	RSPLATANPIISPSTSNHDLRLNRTSTGASR	X;X;X;X;X;X;X;X;X;X;X;Phospho (STY);X;X;X;Phospho (STY);X;X;X;X;X;X;X;X;X;X;X;X;X;X;X	XPPPPPPPPPPPPPPPPPPPPXXXXXXXXXX	1.85e-58	221.14	150.7	_SPLATANPIISPSTS(ph)NHDLR_	SPLATANPIISPS(0.02)T(0.02)S(0.96)NHDLR
gi|472585115	RHTO_08034	243	conserved hypothetical protein	1	S	LVQAVTPSLPPSRSTSPAPPRSRRASMSSSL	X;X;X;X;X;X;X;X;X;X;X;X;X;X;X;Phospho (STY);X;X;X;X;X;X;X;X;X;X;X;X;X;X;X	XXXXXXXXXXXXXPPPPPPPPXXXXXXXXXX	0.00834328	111.06	111.06	_STS(ph)PAPPR_	STS(1)PAPPR
gi|472585160	RHTO_08079	169	pre-mRNA-splicing factor CWC25	2	S	RRKERENSNVTIWPPSPRTPEPEDDGTKSRK	X;X;X;X;X;X;X;X;X;X;X;X;X;X;X;Phospho (STY);X;X;Phospho (STY);X;X;X;X;X;X;X;X;X;X;X;X	XXXXXPPPPPPPPPPPPPPPPPPPPPPPXXX	7.73e-14	133.24	133.24	_ENSNVTIWPPS(ph)PRT(ph)PEPEDDGTK_	ENSNVTIWPPS(1)PRT(1)PEPEDDGTK
gi|472585174	RHTO_08093	406	Ras small GTPase, Ras type	1	S	YIARRVTAVRAFDSLSEDEHAGTPYKRGRKA	X;X;X;X;X;X;X;X;X;X;X;X;X;X;X;Phospho (STY);X;X;X;X;X;X;X;X;X;X;X;X;X;X;X	XXXXXXXXXXPPPPPPPPPPPPPPPPXXXXX	0.00823481	92.993	92.993	_AFDSLS(ph)EDEHAGTPYK_	AFDSLS(0.997)EDEHAGT(0.003)PYK
gi|472585181	RHTO_08100	7	mitochondrial division protein	1	S	_________MHKSTGSGDGFFAGIKETFIPG	X;X;X;X;X;X;X;X;X;X;X;X;X;X;X;Phospho (STY);X;X;X;X;X;X;X;X;X;X;X;X;X;X;X	XXXXXXXXXXXXPPPPPPPPPPPPPXXXXXX	0.000159684	147.1	77.746	_STGS(ph)GDGFFAGIK_	STGS(1)GDGFFAGIK
gi|472585194	RHTO_08113	782	DNA polymerase sigma subunit	4	S	DFVRHDGSVEASRATSKTGSSVDSDEVVEAL	X;X;X;X;X;X;X;X;X;X;X;X;X;X;X;Phospho (STY);X;X;X;Phospho (STY);Phospho (STY);X;X;Phospho (STY);X;X;X;X;X;X;X	XXXXXXXXXXXXXPPPPPPPPPPPPPPPPPP	6.74e-05	85.191	85.191	_ATS(ph)KTGS(ph)S(ph)VDS(ph)DEVVEALIVPPAKR_	AT(0.464)S(0.531)KT(0.184)GS(0.908)S(0.963)VDS(0.951)DEVVEALIVPPAKR
gi|472585194	RHTO_08113	786	DNA polymerase sigma subunit	2;3;4	S	HDGSVEASRATSKTGSSVDSDEVVEALIVPP	X;X;X;X;X;X;X;X;X;X;Phospho (STY);Phospho (STY);X;Phospho (STY);X;Phospho (STY);Phospho (STY);X;X;Phospho (STY);X;X;X;X;X;X;X;X;X;X;X	XXXXXXXXXPPPPPPPPPPPPPPPPPPPPPP	1.11e-08	132.65	84.809	_ATS(ph)KTGS(ph)S(ph)VDS(ph)DEVVEALIVPPAKR_	AT(0.402)S(0.464)KT(0.214)GS(0.935)S(0.986)VDS(0.998)DEVVEALIVPPAKR
gi|472585194	RHTO_08113	787	DNA polymerase sigma subunit	2;3;4	S	DGSVEASRATSKTGSSVDSDEVVEALIVPPA	X;X;X;X;X;X;X;X;X;Phospho (STY);Phospho (STY);X;Phospho (STY);X;Phospho (STY);Phospho (STY);X;X;Phospho (STY);X;X;X;X;X;X;X;X;X;X;X;X	XXXXXXXXPPPPPPPPPPPPPPPPPPPPPPP	1.53e-12	139.7	84.809	_ATS(ph)KTGS(ph)S(ph)VDS(ph)DEVVEALIVPPAKR_	AT(0.402)S(0.464)KT(0.214)GS(0.935)S(0.986)VDS(0.998)DEVVEALIVPPAKR
gi|472585194	RHTO_08113	790	DNA polymerase sigma subunit	1;2;3;4	S	VEASRATSKTGSSVDSDEVVEALIVPPAKRV	X;X;X;X;X;X;X;Phospho (STY);X;Phospho (STY);X;Phospho (STY);Phospho (STY);X;X;Phospho (STY);X;X;X;X;X;X;X;X;X;X;X;X;X;X;X	XXXXXPPPPPPPPPPPPPPPPPPPPPPPPPX	1.53e-12	139.7	139.7	_TGSS(ph)VDS(ph)DEVVEALIVPPAKR_	T(0.006)GS(0.426)S(0.567)VDS(1)DEVVEALIVPPAKR
gi|472585200	RHTO_08119	35	chromatin structure-remodeling complex subunit RSC8	1	S	PTAATAAGGDPSASTSTGDNKRARTQEPGEA	X;X;X;X;X;X;X;X;X;X;X;X;X;X;X;Phospho (STY);X;X;X;X;X;X;X;X;X;X;X;X;X;X;X	PPPPPPPPPPPPPPPPPPPPPPXXXXXXXXX	0.001088	70.761	70.761	_RPAEDDPTAATAAGGDPSASTS(ph)TGDNKR_	RPAEDDPTAATAAGGDPS(0.002)AS(0.213)T(0.159)S(0.506)T(0.12)GDNKR
gi|472585240	RHTO_08159	314	SFRS protein kinase	1;2	S	TSPVIEKLAFQMSKISDSGGSYVGSIKKQGE	X;X;X;X;X;X;X;X;X;X;X;X;X;X;X;Phospho (STY);X;X;X;X;X;X;X;X;Phospho (STY);X;X;X;X;X;X	XXXXXXXXXXXXXXPPPPPPPPPPPPPPXXX	8.66e-05	121.82	75.334	_IS(ph)DSGGSYVGS(ph)IKK_	IS(0.996)DS(0.036)GGS(0.012)Y(0.003)VGS(0.954)IKK
gi|472585240	RHTO_08159	316	SFRS protein kinase	1;2	S	PVIEKLAFQMSKISDSGGSYVGSIKKQGEMT	X;X;X;X;X;X;X;X;X;X;X;X;X;X;X;Phospho (STY);X;X;Phospho (STY);X;X;X;Phospho (STY);X;X;X;X;X;X;X;X	XXXXXXXXXXXXPPPPPPPPPPPPPPXXXXX	0.000166734	140.96	104.45	_ISDS(ph)GGSYVGS(ph)IKK_	IS(0.001)DS(0.998)GGS(0.001)YVGS(0.999)IKK
gi|472585240	RHTO_08159	319	SFRS protein kinase	2	S	EKLAFQMSKISDSGGSYVGSIKKQGEMTATT	X;X;X;X;X;X;X;X;X;X;X;X;Phospho (STY);X;X;Phospho (STY);X;X;X;Phospho (STY);X;X;X;X;X;X;X;X;X;X;X	XXXXXXXXXPPPPPPPPPPPPPPXXXXXXXX	0.000228227	117.3	117.3	_ISDSGGS(ph)YVGS(ph)IKK_	ISDS(0.001)GGS(0.999)YVGS(1)IKK
gi|472585240	RHTO_08159	323	SFRS protein kinase	1;2	S	FQMSKISDSGGSYVGSIKKQGEMTATTADDV	X;X;X;X;X;X;Phospho (STY);X;Phospho (STY);X;X;Phospho (STY);X;X;X;Phospho (STY);X;X;X;X;X;X;X;X;X;X;X;X;X;X;X	XXXXXPPPPPPPPPPPPPPXXXXXXXXXXXX	0.000228227	137.89	117.3	_ISDSGGS(ph)YVGS(ph)IKK_	ISDS(0.001)GGS(0.999)YVGS(1)IKK
gi|472581247	RHTO_05363	152	late secretory pathway protein AVL9 family protein	1	S	SSSASPAGVGMRRTTSSQGATIGAKVWGVCL;SSSASPSGAGMRRTTSSQGATIGAKVWGVCL	X;X;X;X;X;X;X;X;X;X;X;X;X;X;X;Phospho (STY);X;X;X;X;X;X;X;X;X;X;X;X;X;X;X	XXXXXXXXXXXXPPPPPPPPPPPPPXXXXXX	8.74e-05	133.86	133.86	_RTTS(ph)SQGATIGAK_	RT(0.002)T(0.002)S(0.992)S(0.004)QGATIGAK
gi|472581247	RHTO_05363	153	late secretory pathway protein AVL9 family protein		S	SSASPAGVGMRRTTSSQGATIGAKVWGVCLV;SSASPSGAGMRRTTSSQGATIGAKVWGVCLV	X;X;X;X;X;X;X;X;X;X;X;X;X;X;X;Phospho (STY);X;X;X;X;X;X;X;X;X;X;X;X;X;X;X	XXXXXXXXXXXPPPPPPPPPPPPPXXXXXXX	0.00536967	76.073	76.073	_RTTSS(ph)QGATIGAK_	RT(0.216)T(0.216)S(0.216)S(0.353)QGATIGAK
gi|472581267	RHTO_05383	325	conserved hypothetical protein	1	S	ARLTKRVFRAGQRRSSPTSLTRLKTKAEHAA;ARLTKRVFRAGQRRSSPTSLTRLKTKAVHAA	X;X;X;X;X;X;X;X;X;X;X;X;X;X;X;Phospho (STY);X;X;X;X;X;X;X;X;X;X;X;X;X;X;X	XXXXXXXXXXXXXPPPPPPPPPXXXXXXXXX	2.56e-24	206.36	206.36	_RSS(ph)PTSLTR_	RS(0.014)S(0.986)PTSLTR
gi|472581275	RHTO_05391	115	thyroid receptor-interacting protein 13	2;3	S	EKDELADEDDAASRTSGRSTSEDLAPLHVEV	X;X;X;X;X;X;X;X;X;X;X;X;X;X;X;Phospho (STY);X;X;Phospho (STY);X;X;X;X;X;X;X;X;X;X;X;X	XXXXXXXXXXXXXXPPPPPPPPPPPPPPPPP	0.00224237	113.59	66.022	_TS(ph)GRS(ph)TSEDLAPLHVEVR_	T(0.136)S(0.774)GRS(0.37)T(0.36)S(0.36)EDLAPLHVEVR
gi|472581275	RHTO_05391	118	thyroid receptor-interacting protein 13	3	S	ELADEDDAASRTSGRSTSEDLAPLHVEVRLK	X;X;X;X;X;X;X;X;X;X;X;Phospho (STY);Phospho (STY);X;X;Phospho (STY);X;Phospho (STY);X;X;X;X;X;X;X;X;X;X;X;X;X	XXXXXXXXXXXPPPPPPPPPPPPPPPPPPXX	0.00224237	113.59	113.59	_T(ph)SGRS(ph)TS(ph)EDLAPLHVEVR_	T(0.502)S(0.502)GRS(0.522)T(0.522)S(0.953)EDLAPLHVEVR
gi|472581275	RHTO_05391	120	thyroid receptor-interacting protein 13	3	S	ADEDDAASRTSGRSTSEDLAPLHVEVRLKPT	X;X;X;X;X;X;X;X;X;Phospho (STY);X;X;X;Phospho (STY);X;Phospho (STY);X;X;X;X;X;X;X;X;X;X;X;X;X;X;X	XXXXXXXXXPPPPPPPPPPPPPPPPPPXXXX	0.00224237	113.59	113.59	_T(ph)SGRS(ph)TS(ph)EDLAPLHVEVR_	T(0.502)S(0.502)GRS(0.522)T(0.522)S(0.953)EDLAPLHVEVR
gi|472581280	RHTO_05396	352	nucleolar protein 8	2	S	TASPADKTRPLPRERSASPPPYVPAAPRTLI;TASPADRTRPLPRERSASPPPYVPAAPRTLI	X;X;X;X;X;X;X;X;X;X;X;X;X;X;X;Phospho (STY);X;Phospho (STY);X;X;X;X;X;X;X;X;X;X;X;X;X	XXXXXXXXXXXXXPPPPPPPPPPPPPPPXXX	3.56e-17	183.09	167.51	_ERS(ph)AS(ph)PPPYVPAAPR_	ERS(1)AS(1)PPPYVPAAPR
gi|472581280	RHTO_05396	354	nucleolar protein 8	2	S	SPADKTRPLPRERSASPPPYVPAAPRTLIYN;SPADRTRPLPRERSASPPPYVPAAPRTLIYN	X;X;X;X;X;X;X;X;X;X;X;X;X;Phospho (STY);X;Phospho (STY);X;X;X;X;X;X;X;X;X;X;X;X;X;X;X	XXXXXXXXXXXPPPPPPPPPPPPPPPXXXXX	3.56e-17	183.09	164.93	_ERS(ph)AS(ph)PPPYVPAAPR_	ERS(1)AS(1)PPPYVPAAPR
gi|472581282	RHTO_05398	897	K Homology domain containing protein	1	S	PDPRPGSDRKLRLAASSPNIKAIFDANPGGS	X;X;X;X;X;X;X;X;X;X;X;X;X;X;X;Phospho (STY);X;X;X;X;X;X;X;X;X;X;X;X;X;X;X	XXXXXXXXXXXXPPPPPPPPPXXXXXXXXXX	0.00140898	145.46	145.46	_LAAS(ph)SPNIK_	LAAS(0.997)S(0.003)PNIK
gi|472581282	RHTO_05398	898	K Homology domain containing protein	1	S	DPRPGSDRKLRLAASSPNIKAIFDANPGGSA;DPRPGSDRKLRLAASSPNIKAIFDANPGGST	X;X;X;X;X;X;X;X;X;X;X;X;X;X;X;Phospho (STY);X;X;X;X;X;X;X;X;X;X;X;X;X;X;X	XXXXXXXXXXXPPPPPPPPPXXXXXXXXXXX	0.000262888	156.58	156.58	_LAASS(ph)PNIK_	LAAS(0.027)S(0.973)PNIK
gi|472581282	RHTO_05398	142	K Homology domain containing protein	1	S	DGTSAPGTAPTSKRNSVDFNDAMQRLCVDTM;DGTSTAGTAPTSKRNSVDFNDAMQRLCVDTM	X;X;X;X;X;X;X;X;X;X;X;X;X;X;X;Phospho (STY);X;X;X;X;X;X;Oxidation (M);X;X;X;X;X;X;X;X	XXXXXXXXXXXXXPPPPPPPPPPPPXXXXXX	2.81e-05	155.97	83.37	_RNS(ph)VDFNDAM(ox)QR_	RNS(1)VDFNDAMQR
gi|472581296	RHTO_05412	139	uv radiation resistance protein	1	S	GLDAKLPARIRPKRSSSVGTLLGKAIPIDEE	X;X;X;X;X;X;X;X;X;X;X;X;X;X;X;Phospho (STY);X;X;X;X;X;X;X;X;X;X;X;X;X;X;X	XXXXXXXXXXXXXXPPPPPPPPPPXXXXXXX	0.00653644	108.56	108.56	_SS(ph)SVGTLLGK_	S(0.001)S(0.661)S(0.338)VGTLLGK
gi|472581296	RHTO_05412	140	uv radiation resistance protein	1	S	LDAKLPARIRPKRSSSVGTLLGKAIPIDEEE	X;X;X;X;X;X;X;X;X;X;X;X;X;X;X;Phospho (STY);X;X;X;X;X;X;X;X;X;X;X;X;X;X;X	XXXXXXXXXXXXPPPPPPPPPPPXXXXXXXX	1.21e-05	154.36	154.36	_SSS(ph)VGTLLGK_	SSS(1)VGTLLGK
gi|472581311	RHTO_05427	367	Rab GTPase activator	1	S	LDLDAEADESRDSFPSPSSSHSPSKFTSTAN	X;X;X;X;X;X;X;X;X;X;X;X;X;X;X;Phospho (STY);X;X;X;X;X;X;X;X;X;X;X;X;X;X;X	XXXXXXXXXXXPPPPPPPPPPPPPPXXXXXX	0.00559387	82.349	69.485	_DSFPS(ph)PSSSHSPSK_	DS(0.009)FPS(0.982)PS(0.003)S(0.003)S(0.003)HS(0.001)PSK
gi|472581311	RHTO_05427	369	Rab GTPase activator		S	LDAEADESRDSFPSPSSSHSPSKFTSTANPR	X;X;X;X;X;X;X;X;X;X;X;X;X;X;X;Phospho (STY);X;X;X;X;X;X;X;X;X;X;X;X;X;X;X	XXXXXXXXXPPPPPPPPPPPPPPXXXXXXXX	0.0114228	71.806	71.806	_DSFPSPS(ph)SSHSPSK_	DSFPS(0.135)PS(0.322)S(0.322)S(0.194)HS(0.025)PS(0.004)K
gi|472581311	RHTO_05427	370	Rab GTPase activator		S	DAEADESRDSFPSPSSSHSPSKFTSTANPRF	X;X;X;X;X;X;X;X;X;X;X;X;X;X;X;Phospho (STY);X;X;X;X;X;X;X;X;X;X;X;X;X;X;X	XXXXXXXXPPPPPPPPPPPPPPXXXXXXXXX	0.0059479	79.492	61.435	_DSFPSPSS(ph)SHSPSK_	DSFPS(0.175)PS(0.271)S(0.403)S(0.062)HS(0.044)PS(0.044)K
gi|472581311	RHTO_05427	371	Rab GTPase activator		S	AEADESRDSFPSPSSSHSPSKFTSTANPRFP	X;X;X;X;X;X;X;X;X;X;X;X;X;X;X;X;X;X;X;X;X;X;X;X;X;X;X;X;X;X;X	XXXXXXXXXXXXXXXXXXXXXXXXXXXXXXX	0.0059479	79.492	79.492	_DSFPSPSS(ph)SHSPSK_	DSFPS(0.003)PS(0.058)S(0.394)S(0.394)HS(0.075)PS(0.075)K
gi|472581311	RHTO_05427	373	Rab GTPase activator	1	S	ADESRDSFPSPSSSHSPSKFTSTANPRFPRT	X;X;X;X;X;X;X;X;X;X;X;X;X;X;X;Phospho (STY);X;X;X;X;X;X;X;X;X;X;X;X;X;X;X	XXXXXPPPPPPPPPPPPPPXXXXXXXXXXXX	0.00830799	75.819	75.819	_DSFPSPSSSHS(ph)PSK_	DSFPS(0.045)PS(0.073)S(0.073)S(0.073)HS(0.662)PS(0.073)K
gi|472581311	RHTO_05427	338	Rab GTPase activator		S	RGANGSPAKRRSVLSSSAGDDDSHYGDEDLD;RGANGSPGKRRSVLSSSAGDDDSHYGDEDLD	X;X;X;X;X;X;X;X;X;X;X;X;X;X;X;Phospho (STY);X;X;X;X;X;X;X;X;X;X;X;X;X;X;X	XXXXXXXXXXXPPPPPPPPPPPPPPPPPPPP	1.79e-08	94.019	94.019	_SVLSS(ph)SAGDDDSHYGDEDLDLDAEADESR_	S(0.001)VLS(0.023)S(0.486)S(0.486)AGDDDS(0.001)HY(0.001)GDEDLDLDAEADESR
gi|472581311	RHTO_05427	339	Rab GTPase activator		S	GANGSPAKRRSVLSSSAGDDDSHYGDEDLDL;GANGSPGKRRSVLSSSAGDDDSHYGDEDLDL	X;X;X;X;X;X;X;X;X;X;X;X;X;X;X;X;X;X;X;X;X;X;X;X;X;X;X;X;X;X;X	XXXXXXXXXXXXXXXXXXXXXXXXXXXXXXX	1.79e-08	94.019	94.019	_SVLSS(ph)SAGDDDSHYGDEDLDLDAEADESR_	S(0.001)VLS(0.023)S(0.486)S(0.486)AGDDDS(0.001)HY(0.001)GDEDLDLDAEADESR
gi|472586393	RHTO_06980	122	eukaryotic translation initiation factor	1	S	MRGGQAGAIGEGRKSSVGAIGDGRKITPSST;MRGGQAGAIGEGRKSSVGAIGDGRKTTPSST	X;X;X;X;X;X;X;X;X;X;X;X;X;X;X;Phospho (STY);X;X;X;X;X;X;X;X;X;Phospho (STY);Phospho (STY);X;X;Phospho (STY);X	XXXXXXXXXXXXXPPPPPPPPPPPXXXXXXX	0.000194373	153.94	73.887	_KSS(ph)VGAIGDGR_	KS(0.03)S(0.97)VGAIGDGR
gi|472586395	RHTO_06982	572	PX domain containing protein	1	S	VAFRHTGSASSSRRASTVATRSRPLTPVGDR;VAPRHTGSASSSRRASTVATRSRPLTPVGDR	X;X;X;X;X;X;X;X;X;X;X;X;X;X;X;Phospho (STY);X;X;X;X;X;X;X;X;X;X;X;X;X;X;X	XXXXXXXXXXXXXPPPPPPPPXXXXXXXXXX	0.00511513	96.604	96.604	_RAS(ph)TVATR_	RAS(0.958)T(0.042)VATR
gi|472586395	RHTO_06982	842	PX domain containing protein		S	FGLGSLLKKSHSRSASSSSSKSPTFAPASLN;FGLGSLLKKTHSRSASSSSSKSPTFAPASLN	X;X;X;X;X;X;X;X;X;X;X;X;X;X;X;Phospho (STY);X;X;X;X;X;X;X;X;X;X;X;X;X;X;X	XXXXXXXXXXXXXPPPPPPPPPPPPPPPPPP	1.41e-11	125.92	125.92	_SAS(ph)SSSSKSPTFAPASLNEVPASR_	S(0.005)AS(0.197)S(0.197)S(0.197)S(0.197)S(0.197)KS(0.011)PTFAPASLNEVPASR
gi|472586395	RHTO_06982	843	PX domain containing protein		S	GLGSLLKKSHSRSASSSSSKSPTFAPASLNE;GLGSLLKKTHSRSASSSSSKSPTFAPASLNE	X;X;X;X;X;X;X;X;X;X;X;X;X;X;X;X;X;X;X;X;X;X;X;X;X;X;X;X;X;X;X	XXXXXXXXXXXXXXXXXXXXXXXXXXXXXXX	1.41e-11	125.92	125.92	_SAS(ph)SSSSKSPTFAPASLNEVPASR_	S(0.005)AS(0.197)S(0.197)S(0.197)S(0.197)S(0.197)KS(0.011)PTFAPASLNEVPASR
gi|472586395	RHTO_06982	844	PX domain containing protein		S	LGSLLKKSHSRSASSSSSKSPTFAPASLNEV;LGSLLKKTHSRSASSSSSKSPTFAPASLNEV	X;X;X;X;X;X;X;X;X;X;X;X;X;X;X;X;X;X;X;X;X;X;X;X;X;X;X;X;X;X;X	XXXXXXXXXXXXXXXXXXXXXXXXXXXXXXX	1.41e-11	125.92	125.92	_SAS(ph)SSSSKSPTFAPASLNEVPASR_	S(0.005)AS(0.197)S(0.197)S(0.197)S(0.197)S(0.197)KS(0.011)PTFAPASLNEVPASR
gi|472586395	RHTO_06982	845	PX domain containing protein		S	GSLLKKSHSRSASSSSSKSPTFAPASLNEVP;GSLLKKTHSRSASSSSSKSPTFAPASLNEVP	X;X;X;X;X;X;X;X;X;X;X;X;X;X;X;X;X;X;X;X;X;X;X;X;X;X;X;X;X;X;X	XXXXXXXXXXXXXXXXXXXXXXXXXXXXXXX	1.41e-11	125.92	125.92	_SAS(ph)SSSSKSPTFAPASLNEVPASR_	S(0.005)AS(0.197)S(0.197)S(0.197)S(0.197)S(0.197)KS(0.011)PTFAPASLNEVPASR
gi|472586395	RHTO_06982	846	PX domain containing protein		S	SLLKKSHSRSASSSSSKSPTFAPASLNEVPA;SLLKKTHSRSASSSSSKSPTFAPASLNEVPA	X;X;X;X;X;X;X;X;X;X;X;X;X;X;X;Phospho (STY);X;X;X;X;X;X;X;X;X;X;X;X;X;X;X	XXXXXXXXXPPPPPPPPPPPPPPPPPPPPPP	1.41e-11	125.92	82.36	_SASSSSS(ph)KSPTFAPASLNEVPASR_	S(0.123)AS(0.123)S(0.069)S(0.069)S(0.069)S(0.469)KS(0.069)PT(0.008)FAPASLNEVPASR
gi|472586399	RHTO_06986	44	ribosomal rna-processing protein 14, RRP14	1	S	ELLRHVPAKYYIRPESDDEDETPKQSGKLTK	X;X;X;X;X;X;X;X;X;X;X;X;X;X;X;Phospho (STY);X;X;X;X;X;X;X;X;X;X;X;X;X;X;X	XXXXXXXXXPPPPPPPPPPPPPPPPPPPXXX	2.09e-57	230.67	123.08	_YYIRPES(ph)DDEDETPK_	YYIRPES(1)DDEDETPK
gi|472586420	RHTO_07007	14	capsular associated protein, glycosyltransferase family 90 protein	1	S	__MSAQKDGLPAPPDSPAYASTSAYTPAALR	X;X;X;X;X;X;X;X;X;X;X;X;X;X;X;Phospho (STY);X;X;X;X;X;X;X;X;X;X;X;X;X;X;X	XXXXXXXPPPPPPPPPPPPPPPPPPPPPPPP	0.000517532	90.397	81.884	_DGLPAPPDS(ph)PAYASTSAYTPAALR_	DGLPAPPDS(0.971)PAY(0.011)AS(0.004)T(0.005)S(0.001)AY(0.007)T(0.001)PAALR
gi|472586424	RHTO_07011	1953	Tho2 protein	1	S	RKRSANSLADRLAPDSPKRARTDETPPRDSG;RKRSANSLADRLAPDSPKRARTDETPPRDTA	X;X;X;X;X;X;X;X;X;X;X;X;X;X;X;Phospho (STY);X;X;X;X;X;X;X;X;X;X;X;X;X;X;X	XXXXXXXXXXXPPPPPPPPXXXXXXXXXXXX	0.00282539	124.67	100.69	_LAPDS(ph)PKR_	LAPDS(1)PKR
gi|472586442	RHTO_07029	160	membrane anchor Opy2, N-terminal domain containing protein	1	S	NRRTTSPLREGGALISGRTSEDDNPFGDQNR	X;X;X;X;X;X;X;X;X;X;X;X;X;X;X;Phospho (STY);X;X;X;X;X;X;X;X;X;X;X;X;X;X;X	XXXXXXXXXPPPPPPPPPPPPPPPPPPPPPP	0.00423963	80.944	80.944	_EGGALIS(ph)GRTSEDDNPFGDQNR_	EGGALIS(0.968)GRT(0.025)S(0.006)EDDNPFGDQNR
gi|472586442	RHTO_07029	164	membrane anchor Opy2, N-terminal domain containing protein	1	S	TSPLREGGALISGRTSEDDNPFGDQNRSSIG	X;X;X;X;X;X;X;X;X;X;X;X;X;X;X;Phospho (STY);X;X;X;X;X;X;X;X;X;X;X;X;X;X;X	XXXXXPPPPPPPPPPPPPPPPPPPPPPXXXX	1.22e-25	162.09	136.77	_EGGALISGRTS(ph)EDDNPFGDQNR_	EGGALIS(0.043)GRT(0.212)S(0.745)EDDNPFGDQNR
gi|472583212	RHTO_02482	1042	transcription factor ScGATA-6	1	S	SEHTPQASTIHSRRSSASGSSLSKSSQAQQH;SEHTPQTSTIHSRRSSASGSSLSKSSQAQQH	X;X;X;X;X;X;X;X;X;X;X;X;X;X;X;Phospho (STY);X;X;X;X;X;X;X;X;X;X;X;X;X;X;X	XXXXXXXXXXXXXPPPPPPPPPPPXXXXXXX	1.2e-13	183.96	183.96	_RSS(ph)ASGSSLSK_	RS(0.008)S(0.992)ASGSSLSK
gi|472583132	RHTO_02402	608	cAMP-dependent protein kinase regulatory subunit	1	S	RESFGQGFEGSRRGISVGGGDA_________	X;X;Phospho (STY);X;X;X;X;X;X;X;X;X;X;X;X;Phospho (STY);X;X;X;X;X;X;X;X;X;X;X;X;X;X;X	XXXXXXXXXXXXPPPPPPPPPPXXXXXXXXX	0.00651962	85.837	85.837	_RGIS(ph)VGGGDA_	RGIS(1)VGGGDA
gi|472583132	RHTO_02402	272	cAMP-dependent protein kinase regulatory subunit	1	S	AGSSIPVTYNLGRRTSVSAESLDPNAATQSL	X;X;X;X;X;X;X;X;X;X;X;X;X;X;X;X;X;X;X;X;X;X;X;X;X;X;X;X;X;X;X	XXXXXXXXXXXXXXXXXXXXXXXXXXXXXXX	9.26e-38	197.48	197.48	_RT(ph)SVSAESLDPNAATQSLPK_	RT(0.5)S(0.5)VSAESLDPNAATQSLPK
gi|472583132	RHTO_02402	274	cAMP-dependent protein kinase regulatory subunit	1	S	SSIPVTYNLGRRTSVSAESLDPNAATQSLPK	X;X;X;X;X;X;X;X;X;X;X;X;X;X;X;Phospho (STY);X;X;X;X;X;X;X;X;X;X;X;X;X;X;X	XXXXXXXXXXXPPPPPPPPPPPPPPPPPPPP	0.00235975	94.387	94.387	_RTSVS(ph)AESLDPNAATQSLPK_	RT(0.221)S(0.221)VS(0.557)AESLDPNAATQSLPK
gi|472583132	RHTO_02402	277	cAMP-dependent protein kinase regulatory subunit	1	S	PVTYNLGRRTSVSAESLDPNAATQSLPKTVI	X;X;X;X;X;X;X;X;X;X;X;X;X;X;X;Phospho (STY);X;X;X;X;X;X;X;X;X;X;X;X;X;X;X	XXXXXXXXPPPPPPPPPPPPPPPPPPPPXXX	1.93e-14	124.84	105.89	_RTSVSAES(ph)LDPNAATQSLPK_	RT(0.147)S(0.147)VS(0.089)AES(0.616)LDPNAATQSLPK
gi|472583132	RHTO_02402	208	cAMP-dependent protein kinase regulatory subunit		S	ALPQQQQQSQHQRSASTAHTESDEEVEDPRD	X;X;X;X;X;X;X;X;X;X;X;X;X;Phospho (STY);X;Phospho (STY);Phospho (STY);X;X;X;X;X;X;X;X;X;X;X;X;X;X	XXXXXXXXXXXXXPPPPPPPPPPPPPPPPPP	0.00161203	71.853	71.853	_SAS(ph)T(ph)AHTESDEEVEDPRDDPNYHPGR_	S(0.007)AS(0.498)T(0.498)AHT(0.498)ES(0.498)DEEVEDPRDDPNYHPGR
gi|472583132	RHTO_02402	214	cAMP-dependent protein kinase regulatory subunit	2	S	QQSQHQRSASTAHTESDEEVEDPRDDPNYHP	X;X;X;X;X;X;X;X;X;X;Phospho (STY);X;X;Phospho (STY);X;Phospho (STY);X;X;X;X;X;X;X;X;X;X;X;X;X;X;X	XXXXXXXPPPPPPPPPPPPPPPPPPPPPPPP	2.01e-09	114.75	114.75	_SASTAHT(ph)ES(ph)DEEVEDPRDDPNYHPGR_	S(0.002)AS(0.003)T(0.003)AHT(0.993)ES(0.999)DEEVEDPRDDPNYHPGR
gi|472583113	RHTO_02383	553	autophagy-related protein 13	1	S	PSFSGAGGAGGIERASPSSVPRRPSMGSSGA;PSFSGGGGAGGIERASPSSVPRRPSMGSSGA	X;X;X;X;X;X;X;X;X;X;X;X;X;X;X;Phospho (STY);X;X;X;X;X;X;X;X;X;X;X;X;X;X;X	XXXXXXXXXXXXXXPPPPPPPPXXXXXXXXX	0.0128929	76.943	71.349	_AS(ph)PSSVPR_	AS(0.985)PS(0.008)S(0.006)VPR
gi|472583109	RHTO_02378	75	enhancer of zeste	1	S	PQKKKRKLLKSQVPVSPKQERVVTSRRIVKV	X;X;X;X;X;X;X;X;X;X;X;X;X;X;X;Phospho (STY);X;X;X;X;X;X;X;X;X;X;X;X;X;X;X	XXXXXXXXXXPPPPPPPPXXXXXXXXXXXXX	0.011198	83.182	83.182	_SQVPVS(ph)PK_	SQVPVS(1)PK
gi|472583102	RHTO_02371	741	hypothetical protein	1;2	S	EDDDEEVQLSLKAHASPASAKKKAEDLPVEP;EDDDEEVQLSLKAHASPASAKKMAEDLPVEP	X;X;X;X;X;X;X;X;X;X;X;X;X;X;X;Phospho (STY);X;X;Phospho (STY);X;X;X;X;X;X;X;X;X;X;X;X	XXXXXXXXXXXXPPPPPPPPPPXXXXXXXXX	3e-08	148.28	88.075	_AHAS(ph)PAS(ph)AKK_	AHAS(1)PAS(1)AKK
gi|472583102	RHTO_02371	744	hypothetical protein	2	S	DEEVQLSLKAHASPASAKKKAEDLPVEPEEA;DEEVQLSLKAHASPASAKKMAEDLPVEPEEA	X;X;X;X;X;X;X;X;X;X;X;X;Phospho (STY);X;X;Phospho (STY);X;X;X;X;X;X;X;X;X;X;X;X;X;X;X	XXXXXXXXXPPPPPPPPPPXXXXXXXXXXXX	0.00389503	97.69	88.075	_AHAS(ph)PAS(ph)AKK_	AHAS(1)PAS(1)AKK
gi|472583827	RHTO_01917	129	glycoside hydrolase family 5 protein	1;2	S	YGSRGARERDLPNLPSSDDEEAEGLLGRTGG	X;X;X;X;X;X;X;X;X;X;X;X;X;X;X;Phospho (STY);Phospho (STY);X;X;X;X;X;X;X;X;X;X;X;X;X;X	XXXXXXXPPPPPPPPPPPPPPPPPPPPPXXX	5.46e-21	155.58	108.71	_ERDLPNLPS(ph)S(ph)DDEEAEGLLGR_	ERDLPNLPS(1)S(1)DDEEAEGLLGR
gi|472583827	RHTO_01917	130	glycoside hydrolase family 5 protein	1;2	S	GSRGARERDLPNLPSSDDEEAEGLLGRTGGG	X;X;X;X;X;X;X;X;X;X;X;X;X;X;Phospho (STY);Phospho (STY);X;X;X;X;X;X;X;X;X;X;X;X;X;X;X	XXXXXXPPPPPPPPPPPPPPPPPPPPPXXXX	1.75e-25	164.2	108.71	_ERDLPNLPS(ph)S(ph)DDEEAEGLLGR_	ERDLPNLPS(1)S(1)DDEEAEGLLGR
gi|472583827	RHTO_01917	85	glycoside hydrolase family 5 protein	1	S	NPSFFGHARAQSRSTSIDLTPSRTYALAGTG	X;X;X;X;X;X;X;X;X;X;X;X;X;X;X;Phospho (STY);X;X;X;X;X;X;X;X;X;X;X;X;X;X;X	XXXXXXXXXXXXXPPPPPPPPPPXXXXXXXX	0.00889072	150.49	147.26	_STS(ph)IDLTPSR_	ST(0.027)S(0.973)IDLTPSR
gi|472583794	RHTO_01884	353	hypothetical protein	1	S	SFDERATAIPMRGYGSASTSASAPQDKKGKR	X;X;X;X;X;X;X;X;X;X;X;X;X;X;X;Phospho (STY);X;X;X;X;X;X;X;X;X;X;X;X;X;X;X	XXXXXXXXXXXXPPPPPPPPPPPPPPPPXXX	0.00159303	97.273	94.569	_GYGS(ph)ASTSASAPQDKK_	GYGS(0.986)AS(0.006)T(0.006)S(0.001)ASAPQDKK
gi|472583794	RHTO_01884	371	hypothetical protein	1	S	TSASAPQDKKGKRRLSWSARQ__________	X;X;X;X;X;X;X;X;X;X;X;X;X;X;X;Phospho (STY);X;X;X;X;X;X;X;X;X;X;X;X;X;X;X	XXXXXXXXXXXXXPPPPPPPXXXXXXXXXXX	0.00465111	111.61	111.61	_RLS(ph)WSAR_	RLS(0.996)WS(0.004)AR
gi|472583776	RHTO_01866	988	plasma membrane H+-transporting ATPase	1;2	S	GRKVHVSNADLQRFGSHQASASGAALRA___	X;X;X;X;X;X;Phospho (STY);X;X;X;X;X;X;X;X;Phospho (STY);X;X;X;Phospho (STY);X;Phospho (STY);X;X;X;X;X;X;X;X;X	XXXXXXXXXXXXXPPPPPPPPPPPPPPPXXX	3.34e-44	216.72	104.45	_FGS(ph)HQAS(ph)ASGAALRA_	FGS(1)HQAS(1)ASGAALRA
gi|472583776	RHTO_01866	992	plasma membrane H+-transporting ATPase	2	S	HVSNADLQRFGSHQASASGAALRA_______	X;X;Phospho (STY);X;X;X;X;X;X;X;X;Phospho (STY);X;X;X;Phospho (STY);X;X;X;X;X;X;X;X;X;X;X;X;X;X;X	XXXXXXXXXPPPPPPPPPPPPPPPXXXXXXX	0.00427519	107.41	104.45	_FGS(ph)HQAS(ph)ASGAALRA_	FGS(1)HQAS(1)ASGAALRA
gi|472583776	RHTO_01866	994	plasma membrane H+-transporting ATPase	1;2	S	SNADLQRFGSHQASASGAALRA_________	Phospho (STY);X;X;X;X;X;X;X;X;Phospho (STY);X;X;X;X;X;Phospho (STY);X;X;X;X;X;X;X;X;X;X;X;X;X;X;X	XXXXXXXPPPPPPPPPPPPPPPXXXXXXXXX	4.81e-05	134.87	124.86	_FGS(ph)HQASAS(ph)GAALRA_	FGS(1)HQASAS(1)GAALRA
gi|472583776	RHTO_01866	950	plasma membrane H+-transporting ATPase	2	S	QAIKPVEGVPMTRTQSRHESLYSNRTSFLRR	X;X;X;X;X;X;X;X;X;X;X;X;X;X;X;Phospho (STY);X;X;X;Phospho (STY);X;X;X;X;X;X;X;X;X;X;X	XXXXXXXXXXXXXPPPPPPPPPPPPXXXXXX	0.000367153	154.74	154.74	_TQS(ph)RHES(ph)LYSNR_	T(0.026)QS(0.974)RHES(1)LYSNR
gi|472583776	RHTO_01866	954	plasma membrane H+-transporting ATPase	2	S	PVEGVPMTRTQSRHESLYSNRTSFLRRAQRS	X;X;X;X;X;X;X;X;X;X;X;Phospho (STY);X;X;X;Phospho (STY);X;X;X;X;X;X;X;X;X;X;X;X;X;X;X	XXXXXXXXXPPPPPPPPPPPPXXXXXXXXXX	0.000367153	154.74	127.32	_TQS(ph)RHES(ph)LYSNR_	T(0.361)QS(0.639)RHES(1)LYSNR
gi|472583775	RHTO_01865	949	conserved hypothetical protein	1	S	AIRSMKASKVPSGSGSPRAGATEKEKREVSA;AIRSMKASKVPSGSGSPRTAAEKEKREVSAN	X;X;X;X;X;X;X;X;X;X;X;X;X;X;X;Phospho (STY);X;X;X;X;X;X;X;X;X;X;X;X;X;X;X	XXXXXXPPPPPPPPPPPPXXXXXXXXXXXXX	0.00364972	105.46	97.579	_ASKVPSGSGS(ph)PR_	ASKVPS(0.041)GS(0.027)GS(0.932)PR
gi|472583746	RHTO_01836	475	zinc finger protein	2	S	GSRASRFGGQLTADASPPASGATTPTGLGSA	X;X;X;X;X;X;X;X;X;X;X;X;X;X;X;Phospho (STY);X;X;X;X;X;X;Phospho (STY);Phospho (STY);X;X;X;X;X;X;X	XXXXXXPPPPPPPPPPPPPPPPPPPPPPPPP	1.73e-20	118.63	114.49	_FGGQLTADAS(ph)PPASGATT(ph)PTGLGSAERDPATLER_	FGGQLTADAS(0.963)PPAS(0.064)GAT(0.154)T(0.809)PT(0.009)GLGS(0.001)AERDPATLER
gi|472583709	RHTO_01799	557	RRM/R3H domain containing protein	1	S	STAALRRIASRDTVLSNGSLPRSATPSSVAP	X;Phospho (STY);X;X;X;X;X;X;X;X;X;X;X;X;X;Phospho (STY);X;X;X;X;X;X;X;X;X;X;X;X;X;X;X	XXXXXXXXXXXPPPPPPPPPPPXXXXXXXXX	0.00580928	121.76	121.76	_DTVLS(ph)NGSLPR_	DTVLS(0.746)NGS(0.254)LPR
gi|472583709	RHTO_01799	444	RRM/R3H domain containing protein	2	S	GSDVGTSVSMRMERESSEGGSEEGGKELNMN	X;X;X;X;X;X;X;X;X;X;X;Oxidation (M);X;X;X;Phospho (STY);Phospho (STY);X;X;X;X;X;X;X;X;X;X;X;X;Oxidation (M);X	XXXXXXXXXXXPPPPPPPPPPPPPPPPPPPP	0.000117248	77.445	51.586	_M(ox)ERES(ph)S(ph)EGGSEEGGKELNM(ox)NDPQTLELYSR_	MERES(0.972)S(0.866)EGGS(0.161)EEGGKELNMNDPQTLELYSR
gi|472583709	RHTO_01799	445	RRM/R3H domain containing protein	2	S	SDVGTSVSMRMERESSEGGSEEGGKELNMND	X;X;X;X;X;X;X;X;X;X;Oxidation (M);X;X;X;Phospho (STY);Phospho (STY);X;X;X;X;X;X;X;X;X;X;X;X;Oxidation (M);X;X	XXXXXXXXXXPPPPPPPPPPPPPPPPPPPPP	0.000117248	77.445	77.445	_M(ox)ERES(ph)S(ph)EGGSEEGGKELNM(ox)NDPQTLELYSR_	MERES(0.96)S(0.96)EGGS(0.079)EEGGKELNMNDPQT(0.001)LELYSR
gi|472583709	RHTO_01799	449	RRM/R3H domain containing protein	1	S	TSVSMRMERESSEGGSEEGGKELNMNDPQTL	X;X;X;X;X;X;X;X;X;X;X;X;X;X;X;Phospho (STY);X;X;X;X;X;X;X;X;Oxidation (M);X;X;X;X;X;X	XXXXXXXXXPPPPPPPPPPPPPPPPPPPPPP	0.00138177	77.149	71.656	_ESSEGGS(ph)EEGGKELNM(ox)NDPQTLELYSR_	ES(0.143)S(0.143)EGGS(0.714)EEGGKELNMNDPQTLELYSR
gi|472583709	RHTO_01799	489	RRM/R3H domain containing protein	1	S	SSDSFRDELSFSRSLSPHQRRTVHLIATKLG	X;X;X;X;X;X;X;X;X;X;X;X;X;X;X;Phospho (STY);X;X;X;X;X;X;X;X;X;X;X;X;X;X;X	XXXXXXXXXXXXXPPPPPPPXXXXXXXXXXX	0.00831405	98.048	88.495	_SLS(ph)PHQR_	SLS(1)PHQR
gi|472583947	RHTO_01623	19	GTPase activating protein	1	S	GPRTPPLPSHLVVSRSSEDLVEVSLLREDQD	X;X;X;X;X;X;X;X;X;X;X;X;X;X;X;Phospho (STY);X;X;X;X;X;X;X;X;X;X;X;X;X;X;X	XXXXXXXXXXXXXXXPPPPPPPPPPPPXXXX	0.0118379	115.91	115.91	_S(ph)SEDLVEVSLLR_	S(0.844)S(0.156)EDLVEVSLLR
gi|472583947	RHTO_01623	354	GTPase activating protein	1	S	QQPQQEARTSILHQSSPVSRKSARSRPQQER	X;X;X;X;X;X;X;X;X;X;X;X;X;X;X;Phospho (STY);X;X;X;X;X;X;X;X;X;X;X;X;X;X;X	XXXXXXXXPPPPPPPPPPPPXXXXXXXXXXX	0.000895493	107.82	58.071	_TSILHQSS(ph)PVSR_	TSILHQS(0.04)S(0.95)PVS(0.01)R
gi|472583944	RHTO_01620	315	mannose-p-dolichol utilization defect 1 protein	1	S	TPVKQAVGAGPKRTASPASSGSARRYVRKME	X;X;X;X;X;X;X;X;X;X;X;X;X;X;X;Phospho (STY);X;X;X;X;X;X;X;X;X;X;X;X;X;X;X	XXXXXXXXXXXXPPPPPPPPPPPPXXXXXXX	0.00648503	72.315	72.315	_RTAS(ph)PASSGSAR_	RT(0.017)AS(0.976)PAS(0.002)S(0.002)GS(0.002)AR
gi|472584999	RHTO_00853	114	hypothetical protein	2	S	NENRRSFRRPGTPPFSPSQSSFRTDRLSVQS	X;X;X;X;X;X;X;X;X;X;X;Phospho (STY);X;X;X;Phospho (STY);X;X;X;X;X;X;X;X;X;X;X;X;X;X;X	XXXXXXXXPPPPPPPPPPPPPPPXXXXXXXX	0.00168339	109.07	99.059	_RPGT(ph)PPFS(ph)PSQSSFR_	RPGT(1)PPFS(1)PSQSSFR
gi|472585000	RHTO_00854	361	hypothetical protein		S	VASQERHTPSPPRTGSASADGHAYDAAGSQS	X;X;X;X;X;X;X;X;X;Phospho (STY);X;X;X;X;X;Phospho (STY);X;X;X;X;X;X;X;X;X;X;X;X;X;X;X	XXXXXXXXXXXXXPPPPPPPPPPPPPPPPPP	0.00123164	67.911	67.911	_TGS(ph)ASADGHAYDAAGSQSGHLPFPGEPEM(ox)EAPDR_	T(0.074)GS(0.32)AS(0.32)ADGHAY(0.282)DAAGS(0.005)QSGHLPFPGEPEMEAPDR
gi|472585000	RHTO_00854	363	hypothetical protein		S	SQERHTPSPPRTGSASADGHAYDAAGSQSGH	X;X;X;X;X;X;X;Phospho (STY);X;X;X;X;X;X;X;X;X;X;X;X;X;X;X;X;X;X;X;X;X;X;X	XXXXXXXXXXXXXXXXXXXXXXXXXXXXXXX	0.00123164	67.911	67.911	_TGS(ph)ASADGHAYDAAGSQSGHLPFPGEPEM(ox)EAPDR_	T(0.074)GS(0.32)AS(0.32)ADGHAY(0.282)DAAGS(0.005)QSGHLPFPGEPEMEAPDR
gi|472580830	RHTO_05855	1240	Set3 histone deacetylase complex component Snt1p	1	S	AAPPIDERDEDEDEVSAPTSPRMSRSELPTP	X;X;X;X;X;X;X;X;X;X;X;X;X;X;X;Phospho (STY);X;X;X;X;X;X;X;X;X;X;X;X;X;X;X	PPPPPPPPPPPPPPPPPPPPPPXXXXXXXXX	3.06e-05	104.03	104.03	_SAAPPIDERDEDEDEVS(ph)APTSPR_	SAAPPIDERDEDEDEVS(0.94)APT(0.03)S(0.03)PR
gi|472580830	RHTO_05855	1244	Set3 histone deacetylase complex component Snt1p	1	S	IDERDEDEDEVSAPTSPRMSRSELPTPVDDH;IDERDEDEDEVSAPTSPRMSRSELPTPVEDQ	X;X;X;X;X;X;X;X;X;X;X;X;X;X;X;Phospho (STY);X;X;X;X;X;X;X;X;X;X;X;X;X;X;X	PPPPPPPPPPPPPPPPPPXXXXXXXXXXXXX	3.05e-06	112.48	112.48	_SAAPPIDERDEDEDEVSAPTS(ph)PR_	SAAPPIDERDEDEDEVS(0.215)APT(0.148)S(0.638)PR
gi|472580829	RHTO_05854	26	protein of heat shock protein 70 family	1;2	S	NKSSKAPSKVASKAPSGASTPALRTEPQTPV	X;X;X;X;X;X;X;X;X;X;X;Phospho (STY);X;X;X;Phospho (STY);X;X;Phospho (STY);Phospho (STY);X;X;X;X;X;X;X;X;X;X;X	XXXXXXXXXPPPPPPPPPPPPPPPXXXXXXX	8.36e-06	162.48	153.81	_APS(ph)GAS(ph)TPALR_	APS(1)GAS(0.932)T(0.068)PALR
gi|472580829	RHTO_05854	29	protein of heat shock protein 70 family	1;2	S	SKAPSKVASKAPSGASTPALRTEPQTPVKLA	X;X;X;X;X;X;X;X;X;X;X;X;Phospho (STY);X;X;Phospho (STY);Phospho (STY);X;X;X;X;X;X;X;X;X;X;X;X;X;X	XXXXXXPPPPPPPPPPPPPPPXXXXXXXXXX	1.56e-05	153.81	153.81	_APS(ph)GAS(ph)TPALR_	APS(1)GAS(0.932)T(0.068)PALR
gi|472580829	RHTO_05854	22	protein of heat shock protein 70 family	2	S	QKGSNKSSKAPSKVASKAPSGASTPALRTEP	X;X;X;X;X;X;X;X;X;X;X;X;X;X;X;Phospho (STY);X;X;X;Phospho (STY);X;X;Phospho (STY);Phospho (STY);X;X;X;X;X;X;X	XXXXXXXXXXXXXPPPPPPPPPPPPPPPXXX	0.0125249	90.729	90.729	_VAS(ph)KAPS(ph)GASTPALR_	VAS(1)KAPS(0.951)GAS(0.047)T(0.003)PALR
gi|472580787	RHTO_05812	12	DNA polymerase epsilon subunit 3	1	S	____MPRAKAKKPAQSDPADEDGGLEAFELQ	X;X;X;X;X;X;X;X;X;X;X;X;X;X;X;Phospho (STY);X;X;X;X;X;X;X;X;X;X;X;X;X;X;X	XXXXXXXXXPPPPPPPPPPPPPPPPPPPPPP	7.4e-103	238.8	168.69	_KPAQS(ph)DPADEDGGLEAFELQK_	KPAQS(1)DPADEDGGLEAFELQK
gi|472580771	RHTO_05796	351	molecular chaperone DnaK	1	S	GPLIQKTIEPCKKALSDAGMKASEVEEVILV	X;X;X;X;X;X;X;X;X;X;X;X;X;X;X;Phospho (STY);X;X;X;Oxidation (M);X;X;X;X;X;X;X;X;X;X;X	XXXXXXXXXXXXXPPPPPPPPXXXXXXXXXX	0.00828771	93.096	80.102	_ALS(ph)DAGM(ox)K_	ALS(1)DAGMK
gi|472580771	RHTO_05796	109	molecular chaperone DnaK	1	S	ENTFFATKRLIGRKFSDAEVQKDLNNVPFKI	X;X;X;X;X;X;X;X;X;X;X;X;X;X;X;Phospho (STY);X;X;X;X;X;X;X;X;X;X;X;X;X;X;X	XXXXXXXXXXXXXPPPPPPPPPXXXXXXXXX	0.000882684	134.61	118.76	_KFS(ph)DAEVQK_	KFS(1)DAEVQK
gi|472580769	RHTO_05794	169	pre-rrna processing protein Utp22	1	S	AELDKKRKAKAARKLSPAELRALAFAELTAS	X;X;X;X;X;X;X;X;X;X;X;X;X;X;X;Phospho (STY);X;X;X;X;X;X;X;X;X;X;X;X;X;X;X	XXXXXXXXXXXXXPPPPPPPPXXXXXXXXXX	0.0104128	73.499	73.499	_KLS(ph)PAELR_	KLS(1)PAELR
gi|472583289	RHTO_02316	1295	PHD finger and BAH domain protein (Snt2)	2	S	RKVRAPAALRDTTAFSDDPALQQLAQTSPRP	X;X;X;X;X;X;X;X;X;X;X;X;X;X;X;Phospho (STY);X;X;X;X;X;X;X;X;X;X;Phospho (STY);X;X;X;X	XXXXXXXXXXPPPPPPPPPPPPPPPPPPPPP	0.000654454	94.387	94.387	_DTTAFS(ph)DDPALQQLAQT(ph)SPRPR_	DTTAFS(1)DDPALQQLAQT(0.861)S(0.139)PRPR
gi|472583265	RHTO_02311	683	conserved hypothetical protein	1	S	ARRMTRSRASTVEPASPPPQNTTTRRSTRAS	X;X;X;X;X;X;X;X;X;X;X;X;X;X;X;Phospho (STY);X;X;X;X;X;X;X;X;X;X;X;X;X;X;X	XXXXXXXXPPPPPPPPPPPPPPPPPPXXXXX	0.00454795	79.676	67.326	_ASTVEPAS(ph)PPPQNTTTR_	ASTVEPAS(1)PPPQNTTTR
gi|472583387	RHTO_02284	612	zinc finger, RING-type and FHA domain containing protein	1	S	SIRSGIGARPSASRRSSAQALAQTFAAGEAR	Phospho (STY);X;X;X;X;X;X;X;X;X;X;X;Phospho (STY);X;X;Phospho (STY);X;X;X;X;X;X;X;X;X;X;X;X;X;X;X	XXXXXXXXXXXXXXPPPPPPPPPPPPPPPPP	9.08e-06	138.19	138.19	_RS(ph)SAQALAQTFAAGEAR_	RS(0.5)S(0.5)AQALAQTFAAGEAR
gi|472583387	RHTO_02284	613	zinc finger, RING-type and FHA domain containing protein	1	S	IRSGIGARPSASRRSSAQALAQTFAAGEARA	X;X;X;X;X;X;X;X;X;X;X;Phospho (STY);X;X;X;Phospho (STY);X;X;X;X;X;X;X;X;X;X;X;X;X;X;X	XXXXXXXXXXXXXPPPPPPPPPPPPPPPPPX	3.1e-10	149	149	_RSS(ph)AQALAQTFAAGEAR_	RS(0.014)S(0.986)AQALAQTFAAGEAR
gi|472583277	RHTO_02243	542	polo-like kinase	1	S	KGRVEKEVRAATAPDSPISELLRSARKPLMV	X;X;X;X;X;X;X;X;X;X;X;X;X;X;X;Phospho (STY);X;X;X;X;X;X;X;X;X;X;X;X;X;X;X	XXXXXXXXXPPPPPPPPPPPPPPXXXXXXXX	2.97e-06	145.69	145.69	_AATAPDS(ph)PISELLR_	AATAPDS(0.998)PIS(0.002)ELLR
gi|472583288	RHTO_02231	146	histidine kinase	2;3	S	EQTNDYDCWKRTTLPSNTASHRGATGTGTGT;EQTNDYDCWKRTTLPSNTASHRGGATGTGTG	X;X;X;X;X;X;X;X;X;X;X;X;Phospho (STY);X;X;Phospho (STY);X;Phospho (STY);X;Phospho (STY);X;X;X;X;X;X;X;X;X;X;X	XXXXXXXXXXPPPPPPPPPPPPXXXXXXXXX	0.00144479	113.53	113.53	_TTLPS(ph)NT(ph)ASHR_	TTLPS(0.984)NT(0.939)AS(0.077)HR
gi|472583288	RHTO_02231	150	histidine kinase	1;2;3	S	DYDCWKRTTLPSNTASHRGATGTGTGTGVGT;DYDCWKRTTLPSNTASHRGGATGTGTGTGVG	X;X;X;X;X;X;X;X;Phospho (STY);X;X;Phospho (STY);X;X;X;Phospho (STY);X;X;X;X;X;X;X;X;X;X;X;X;X;X;X	XXXXXXPPPPPPPPPPPPXXXXXXXXXXXXX	0.00254501	94.688	94.688	_TTLPSNTAS(ph)HR_	TTLPS(0.098)NT(0.098)AS(0.804)HR
gi|472583405	RHTO_02228	597	transcription factor TFIIIB complex subunit brf1	3	S	EGDTPLIGQTYGRKGSRVGTPIVTPEPTWRQ	X;X;X;X;X;X;X;X;X;X;X;X;X;X;X;Phospho (STY);X;X;X;Phospho (STY);X;X;X;Phospho (STY);X;X;X;X;X;X;X	XXXXXXXXXXXXXPPPPPPPPPPPPPPPPPX	0.000796598	116.94	116.94	_KGS(ph)RVGT(ph)PIVT(ph)PEPTWR_	KGS(1)RVGT(1)PIVT(1)PEPTWR
gi|472583417	RHTO_02202	853	conserved hypothetical protein	1	S	RGRESLESSPTKERGSIGGTAGGVEEQQKMV	X;X;X;X;X;X;X;X;X;X;X;X;X;X;X;Phospho (STY);X;X;X;X;X;X;X;X;X;X;X;X;X;X;X	XXXXXXXXXXXXPPPPPPPPPPPPPPPPPXX	1.7e-05	120.31	93.73	_ERGS(ph)IGGTAGGVEEQQK_	ERGS(0.999)IGGT(0.001)AGGVEEQQK
gi|472583417	RHTO_02202	933	conserved hypothetical protein	1;2	S	PPKIPPFPTGPRFAPSPPVSPQRSAFAPPPP;PPKLPPFPTGPRFAPSPPVSPQRSAFAPPPP	X;X;X;X;X;X;X;X;X;X;X;X;X;X;X;Phospho (STY);X;X;X;Phospho (STY);X;X;X;X;X;X;X;X;X;X;X	XXXXXXXXXXXXPPPPPPPPPPPXXXXXXXX	6.1e-69	151.9	140.96	_FAPS(ph)PPVS(ph)PQR_	FAPS(1)PPVS(1)PQR
gi|472583417	RHTO_02202	937	conserved hypothetical protein	1;2	S	PPFPTGPRFAPSPPVSPQRSAFAPPPPPPAV;PPFPTGPRFAPSPPVSPQRSAFAPPPPPPPA	X;X;X;X;X;X;X;X;X;X;X;Phospho (STY);X;X;X;Phospho (STY);X;X;X;X;X;X;X;X;X;X;X;X;X;X;X	XXXXXXXXPPPPPPPPPPPXXXXXXXXXXXX	6.1e-69	151.9	140.96	_FAPS(ph)PPVS(ph)PQR_	FAPS(1)PPVS(1)PQR
gi|472583283	RHTO_02200	192	F-box and WD repeat domain containing protein	2	S	ASNSSPNPSATSSHPSPSASPRSFVPRPTRM	X;X;X;X;X;X;X;X;X;X;X;X;X;X;X;Phospho (STY);X;Phospho (STY);X;Phospho (STY);X;X;X;X;X;X;X;X;X;X;X	PPPPPPPPPPPPPPPPPPPPPPXXXXXXXXX	0.000406509	76.439	72.348	_HSLLAGDPIASNSSPNPSATSSHPS(ph)PSAS(ph)PR_	HSLLAGDPIASNSSPNPSAT(0.003)S(0.003)S(0.003)HPS(0.967)PS(0.048)AS(0.975)PR
gi|472583283	RHTO_02200	194	F-box and WD repeat domain containing protein	2	S	NSSPNPSATSSHPSPSASPRSFVPRPTRMTT	X;X;X;X;X;X;X;X;X;X;X;X;X;Phospho (STY);X;Phospho (STY);X;X;X;X;X;X;X;X;X;X;X;X;X;X;X	PPPPPPPPPPPPPPPPPPPPXXXXXXXXXXX	0.000406509	76.439	76.439	_HSLLAGDPIASNSSPNPSATSSHPS(ph)PS(ph)ASPR_	HSLLAGDPIASNSSPNPS(0.001)AT(0.06)S(0.06)S(0.06)HPS(0.746)PS(0.693)AS(0.38)PR
gi|472583283	RHTO_02200	196	F-box and WD repeat domain containing protein	2	S	SPNPSATSSHPSPSASPRSFVPRPTRMTTTQ	X;X;X;X;X;X;X;X;X;X;X;Phospho (STY);X;X;X;Phospho (STY);X;X;X;X;X;X;X;X;X;X;X;X;X;X;X	PPPPPPPPPPPPPPPPPPXXXXXXXXXXXXX	0.00110803	72.348	72.348	_HSLLAGDPIASNSSPNPSATSSHPS(ph)PSAS(ph)PR_	HSLLAGDPIASNSSPNPSAT(0.003)S(0.003)S(0.003)HPS(0.967)PS(0.048)AS(0.975)PR
gi|472583258	RHTO_02152	804	protein transport protein SEC24		S	DTCVNSLLAYRKHCASSTSPAQLILPESFKL	X;X;X;X;X;X;X;X;X;X;X;X;X;X;X;Phospho (STY);X;X;X;X;X;X;X;X;X;X;X;Phospho (STY);X;X;X	XXXXXXXXXXXXPPPPPPPPPPPPPPPPPPX	0.00503563	77.746	77.746	_HCAS(ph)STSPAQLILPES(ph)FK_	HCAS(0.491)S(0.491)T(0.016)S(0.003)PAQLILPES(1)FK
gi|472583258	RHTO_02152	805	protein transport protein SEC24		S	TCVNSLLAYRKHCASSTSPAQLILPESFKLF	X;X;X;X;X;X;X;X;X;X;X;X;X;X;X;X;X;X;X;X;X;X;X;X;X;X;X;X;X;X;X	XXXXXXXXXXXXXXXXXXXXXXXXXXXXXXX	0.00503563	77.746	77.746	_HCAS(ph)STSPAQLILPES(ph)FK_	HCAS(0.491)S(0.491)T(0.016)S(0.003)PAQLILPES(1)FK
gi|472583258	RHTO_02152	816	protein transport protein SEC24	2	S	HCASSTSPAQLILPESFKLFPLYSLAVIKTK	X;X;X;Phospho (STY);X;X;X;X;X;X;X;X;X;X;X;Phospho (STY);X;X;X;X;X;X;X;X;X;X;X;X;X;X;X	PPPPPPPPPPPPPPPPPPXXXXXXXXXXXXX	0.00503563	77.746	77.746	_HCAS(ph)STSPAQLILPES(ph)FK_	HCAS(0.491)S(0.491)T(0.016)S(0.003)PAQLILPES(1)FK
gi|472583327	RHTO_02145	1002	telomere maintenance protein	1	S	LGGGEGAAGAAQRGVSVGPTAKELGAGLVVP;LGGGEGAAGAAQRGVSVGPTAKGASAGLVVP	X;X;X;X;X;X;X;X;X;X;X;X;X;X;X;Phospho (STY);X;X;X;X;X;X;X;X;X;X;X;X;X;X;X	XXXXXXXXXXXXXPPPPPPPPPXXXXXXXXX	0.00922246	94.465	94.465	_GVS(ph)VGPTAK_	GVS(0.979)VGPT(0.021)AK
gi|472583327	RHTO_02145	277	telomere maintenance protein	1	S	SPNVQSRNSSASPSPSPAHSPAADSTSPTNE;SSNVQSRNSSASPSPSPAHSPAADSTSPTNE	X;X;X;X;X;X;X;X;X;X;X;X;X;X;X;Phospho (STY);X;X;X;X;X;X;X;X;X;X;X;X;X;X;X	XXXXXXXPPPPPPPPPPPPPPPPPPPPPPPP	2.65e-07	113.36	113.36	_NSSASPSPS(ph)PAHSPAADSTSPTNER_	NSSAS(0.007)PS(0.094)PS(0.896)PAHS(0.003)PAADSTSPTNER
gi|472583327	RHTO_02145	288	telomere maintenance protein	1	S	SPSPSPAHSPAADSTSPTNERKSPLLAPPSR	X;X;X;X;X;X;X;X;X;X;X;X;X;X;X;Phospho (STY);X;X;X;X;X;X;X;X;X;X;X;X;X;X;X	PPPPPPPPPPPPPPPPPPPPPXXXXXXXXXX	0.000453638	71.756	66.845	_NSSASPSPSPAHSPAADSTS(ph)PTNER_	NSSASPS(0.001)PS(0.002)PAHS(0.006)PAADS(0.041)T(0.178)S(0.594)PT(0.178)NER
gi|472583327	RHTO_02145	245	telomere maintenance protein	1	S	PAQQQPQQRSSSPYLSPEAARSSPTQLQPDL;PPPAQQQQRSSSPYLSPEAARSSPTQLQPDQ	X;X;X;X;X;X;X;X;X;X;X;X;X;X;X;Phospho (STY);X;X;X;X;X;Phospho (STY);X;X;X;X;X;X;X;X;X	XXXXXXXXXPPPPPPPPPPPPXXXXXXXXXX	0.00532179	127.32	122.08	_SSSPYLS(ph)PEAAR_	SSSPYLS(1)PEAAR
gi|472586614	RHTO_06137	862	SCP160 protein	2	S	VINFPKDGRRGDSTDSAPSTPSSSEITIRGP	X;X;X;X;X;X;X;X;X;X;X;X;X;X;X;Phospho (STY);X;X;Phospho (STY);Phospho (STY);X;X;X;X;X;X;X;X;X;X;X	XXXXXXXXXPPPPPPPPPPPPPPPPPPPPXX	4.54e-12	135.25	135.25	_RGDSTDS(ph)APS(ph)TPSSSEITIR_	RGDSTDS(1)APS(0.554)T(0.442)PSS(0.003)S(0.001)EITIR
gi|472586614	RHTO_06137	865	SCP160 protein	2	S	FPKDGRRGDSTDSAPSTPSSSEITIRGPSKG	X;X;X;X;X;X;X;X;X;X;X;X;Phospho (STY);X;X;Phospho (STY);X;X;X;X;X;X;X;X;X;X;X;X;X;X;X	XXXXXXPPPPPPPPPPPPPPPPPPPPXXXXX	4.54e-12	135.25	130.27	_RGDSTDS(ph)APS(ph)TPSSSEITIR_	RGDS(0.002)T(0.002)DS(0.996)APS(0.56)T(0.44)PSSSEITIR
gi|472586643	RHTO_06166	45	40S ribosomal protein s0	1	S	KNVEKKMTPYVWKRRSDGVNIINVGKTWEKI	X;X;X;X;X;X;X;X;X;X;X;X;X;X;X;Phospho (STY);X;X;X;X;X;X;X;X;X;X;X;X;X;X;X	XXXXXXXXXXXXXPPPPPPPPPPPPPXXXXX	0.0109171	85.845	85.845	_RRS(ph)DGVNIINVGK_	RRS(1)DGVNIINVGK
gi|472586661	RHTO_06184	206	conjugated polyketone reductase C1	1	S	IMEKHNIRVESYGGLSPLLRHPTGGPIKPLL	X;X;X;X;X;X;X;X;X;X;X;X;X;X;X;Phospho (STY);X;X;X;X;X;X;X;X;X;X;X;X;X;X;X	XXXXXXXXPPPPPPPPPPPPXXXXXXXXXXX	0.0109013	102.5	102.5	_VESYGGLS(ph)PLLR_	VESYGGLS(1)PLLR
gi|472586664	RHTO_06187	168	transcriptional regulator Cti6	1	S	LHGPGGLLRKVSRKSSAPAAGRGGSPTSTRD;LHGPGGLLRKVSRKSSAPAAGRSGSPTSTRD	X;X;X;X;X;X;X;X;X;X;X;X;X;X;X;Phospho (STY);X;X;X;X;X;X;X;X;X;X;X;X;X;X;X	XXXXXXXXXXXXXPPPPPPPPPXXXXXXXXX	0.006591	98.407	98.407	_KSS(ph)APAAGR_	KS(0.021)S(0.979)APAAGR
gi|472586664	RHTO_06187	39	transcriptional regulator Cti6	1	S	KGSSSGGRGTGKRSASAALAEDDYSGGSKRA;KGSSSSGRGTGKRSASAALAEDDYSGGSKRA	X;X;X;X;X;X;X;X;X;X;X;X;X;X;X;Phospho (STY);X;X;X;X;X;X;X;X;X;X;X;X;X;X;X	XXXXXXXXXXXXXPPPPPPPPPPPPPPPPPX	0.00895753	82.877	82.877	_SAS(ph)AALAEDDYSGGSKR_	S(0.113)AS(0.887)AALAEDDYSGGSKR
gi|472586720	RHTO_06243	107	mitotic checkpoint family protein	1	S	SARPDSRISSLKRRPSAADLQQESETASLKR	X;X;X;X;X;X;X;X;X;X;X;X;X;X;X;Phospho (STY);X;X;X;X;X;X;X;X;X;X;X;X;X;X;X	XXXXXXXXXXXXXPPPPPPPPPPPPPPPPPP	0.00220973	99.409	99.409	_RPS(ph)AADLQQESETASLKR_	RPS(1)AADLQQESETASLKR
gi|472586726	RHTO_06249	98	40S ribosomal protein s17	1	S	QEEERERKDNYVPEVSALDSQGEPLEVDPDT	X;X;X;X;X;X;X;X;X;X;X;X;X;X;X;Phospho (STY);X;X;X;X;X;X;X;X;X;X;X;X;X;X;X	XXXXXXXPPPPPPPPPPPPPPPPPPPPPPPP	0.00906363	63.122	63.122	_KDNYVPEVS(ph)ALDSQGEPLEVDPDTKDLLK_	KDNY(0.129)VPEVS(0.753)ALDS(0.118)QGEPLEVDPDTKDLLK
gi|472586726	RHTO_06249	102	40S ribosomal protein s17	1	S	RERKDNYVPEVSALDSQGEPLEVDPDTKDLL	X;X;X;X;X;X;X;X;X;X;X;X;X;X;X;Phospho (STY);X;X;X;X;X;X;X;X;X;X;X;X;X;X;X	XXXPPPPPPPPPPPPPPPPPPPPPPPPPPPP	4.01e-19	127.35	126.97	_KDNYVPEVSALDS(ph)QGEPLEVDPDTKDLLK_	KDNYVPEVSALDS(1)QGEPLEVDPDTKDLLK
gi|472586727	RHTO_06250	302	conserved hypothetical protein	2	S	HRSSRSSPINTLTPPSPASSIRAGRPRASTL;HRSSRSSPINTLTPPSPASSIRNAGRPRAST	X;X;X;X;X;X;X;X;X;X;X;X;X;X;X;Phospho (STY);X;X;Phospho (STY);X;X;X;X;X;X;X;X;X;X;X;X	XXXXXPPPPPPPPPPPPPPPPPXXXXXXXXX	0.0106937	95.195	95.195	_SSPINTLTPPS(ph)PAS(ph)SIR_	SSPINTLTPPS(0.925)PAS(0.538)S(0.538)IR
gi|472586727	RHTO_06250	305	conserved hypothetical protein	2	S	SRSSPINTLTPPSPASSIRAGRPRASTLQRL;SRSSPINTLTPPSPASSIRNAGRPRASTLQR	X;X;X;X;X;X;X;X;X;X;X;X;Phospho (STY);X;X;Phospho (STY);Phospho (STY);X;X;X;X;X;X;X;X;X;X;X;X;X;X	XXPPPPPPPPPPPPPPPPPXXXXXXXXXXXX	0.00390121	101.5	101.5	_SSPINTLTPPSPAS(ph)S(ph)IR_	SSPINTLTPPS(0.525)PAS(0.768)S(0.707)IR
gi|472586727	RHTO_06250	306	conserved hypothetical protein	2	S	RSSPINTLTPPSPASSIRAGRPRASTLQRLL;RSSPINTLTPPSPASSIRNAGRPRASTLQRL	X;X;X;X;X;X;X;X;X;X;X;X;X;X;Phospho (STY);Phospho (STY);X;X;X;X;X;X;X;X;X;X;X;X;X;X;X	XPPPPPPPPPPPPPPPPPXXXXXXXXXXXXX	0.00390121	101.5	101.5	_SSPINTLTPPSPAS(ph)S(ph)IR_	SSPINTLTPPS(0.525)PAS(0.768)S(0.707)IR
gi|472586756	RHTO_06279	68	histone acetylation-related protein	1;2	S	ATREASGSQPLKRRLSEASTNSSQQLKKSKL	X;X;X;X;X;X;X;X;X;X;X;X;X;X;X;Phospho (STY);X;X;X;Phospho (STY);X;X;X;X;X;X;X;X;X;X;X	XXXXXXXXXXXXXPPPPPPPPPPPPPPPXXX	3.32e-06	148.2	148.2	_RLS(ph)EAST(ph)NSSQQLK_	RLS(1)EAS(0.34)T(0.596)NS(0.032)S(0.032)QQLK
gi|472586760	RHTO_06283	398	SNARE associated Golgi protein	1	S	QQQQGRYGHLPLRGASEDQYGPPPSEGGIAY	X;X;X;X;X;X;X;X;X;X;X;X;X;X;X;Phospho (STY);X;X;X;X;X;X;X;X;X;X;X;X;X;X;X	XXXXXXPPPPPPPPPPPPPPPPPPPPPPPPP	0.000796617	70.701	70.701	_YGHLPLRGAS(ph)EDQYGPPPSEGGIAYQPPSDAQER_	Y(0.001)GHLPLRGAS(0.86)EDQY(0.136)GPPPS(0.003)EGGIAYQPPSDAQER
gi|472586776	RHTO_06299	1825	Mediator complex, subunit Med12	1	S	RGAKRKSTTEVVVLDSDDEAEAPSKPKKAKA	X;X;X;X;X;X;X;X;X;X;X;X;X;X;X;Phospho (STY);X;X;X;X;X;X;X;X;X;X;X;X;X;X;X	XXXXXPPPPPPPPPPPPPPPPPPPPPPXXXX	1.36e-26	166.91	166.91	_STTEVVVLDS(ph)DDEAEAPSKPK_	STTEVVVLDS(1)DDEAEAPSKPK
gi|472586787	RHTO_06310	1339	adenylate cyclase	1;2	S	YGNLLLPALESRRKGSEISLTDKTMSSVRTG	X;X;X;X;X;X;X;X;X;X;X;X;X;X;X;Phospho (STY);X;X;Phospho (STY);X;X;X;X;X;X;X;X;X;X;X;X	XXXXXXXXXXXXPPPPPPPPPPPXXXXXXXX	0.00600209	82.651	82.651	_KGS(ph)EISLTDK_	KGS(1)EISLTDK
gi|472586787	RHTO_06310	278	adenylate cyclase	1;2	S	GSGSHASYASNGRRPSLAPSYSDAGPRGAHH	X;X;X;X;X;X;X;X;X;X;X;X;X;X;X;Phospho (STY);X;X;X;Phospho (STY);X;Phospho (STY);X;X;X;X;X;X;X;X;X	XXXXXXXXXXXXXPPPPPPPPPPPPPPXXXX	2.05e-06	149.93	149.93	_RPS(ph)LAPS(ph)YSDAGPR_	RPS(1)LAPS(0.79)YS(0.21)DAGPR
gi|472586787	RHTO_06310	282	adenylate cyclase	2	S	HASYASNGRRPSLAPSYSDAGPRGAHHGQAS	X;X;X;X;X;X;X;X;X;X;X;Phospho (STY);X;X;X;Phospho (STY);X;X;X;X;X;X;X;X;X;X;X;X;X;X;X	XXXXXXXXXPPPPPPPPPPPPPPXXXXXXXX	2.05e-06	149.93	149.93	_RPS(ph)LAPS(ph)YSDAGPR_	RPS(1)LAPS(0.79)YS(0.21)DAGPR
gi|472586808	RHTO_06331	156	actin cytoskeleton protein	1	S	LRFFNPLKDRVTTAASPHVERAQQKFAEVDQ;LRYFNPLKDRVTTAASPHVERAQQKFAEVDQ	X;X;X;X;X;X;X;X;X;X;X;X;X;X;X;Phospho (STY);X;X;X;X;X;X;X;X;X;X;X;X;X;X;X	XXXXXXXXXXPPPPPPPPPPPXXXXXXXXXX	1.85e-13	183.96	183.96	_VTTAAS(ph)PHVER_	VTTAAS(1)PHVER
gi|472586812	RHTO_06335	200	splicing factor 1 SF1	2	S	RALRTGQVVPPDGARSPSPPPTYDSHGRRTN	X;X;X;X;X;X;X;X;X;X;X;X;X;X;X;Phospho (STY);X;Phospho (STY);X;X;X;X;X;X;X;X;X;X;X;X;X	XXXXPPPPPPPPPPPPPPPPPPPPPPPPPXX	1.1e-23	147.76	132.01	_TGQVVPPDGARS(ph)PS(ph)PPPTYDSHGR_	TGQVVPPDGARS(1)PS(1)PPPTYDSHGR
gi|472586812	RHTO_06335	202	splicing factor 1 SF1	1;2	S	LRTGQVVPPDGARSPSPPPTYDSHGRRTNTR	X;X;X;X;X;X;X;X;X;X;X;X;X;Phospho (STY);X;Phospho (STY);X;X;X;X;X;X;X;X;X;X;X;X;X;X;X	XXPPPPPPPPPPPPPPPPPPPPPPPPPXXXX	1.1e-23	147.76	132.01	_TGQVVPPDGARS(ph)PS(ph)PPPTYDSHGR_	TGQVVPPDGARS(1)PS(1)PPPTYDSHGR
gi|472586828	RHTO_06351	732	serine/threonine protein kinase ATG1	1	S	LAKAFSNLSSLKIFGSPTDGILVRRSSARKP	X;X;X;X;X;X;X;X;X;X;X;X;X;X;X;Phospho (STY);X;X;X;X;X;X;X;X;X;X;X;X;X;X;X	XXXXXXXXXXXXPPPPPPPPPPPPXXXXXXX	0.000230644	118.52	101.43	_IFGS(ph)PTDGILVR_	IFGS(0.991)PT(0.009)DGILVR
gi|472582208	RHTO_03948	61	inositol-hexakisphosphate kinase	2	S	SATSGKTMRTRTRSGSPASSPGQSSSGSSIF	X;X;X;X;X;X;X;X;X;X;X;X;X;X;X;Phospho (STY);X;X;Phospho (STY);X;X;X;X;X;X;X;X;Phospho (STY);X;X;X	XXXXXXXXXXXXXPPPPPPPPPPPPPPPPPP	0.00839672	64.594	64.594	_SGS(ph)PAS(ph)SPGQSSSGSSIFDRPSASSHSTR_	S(0.19)GS(0.809)PAS(0.732)S(0.245)PGQS(0.008)S(0.007)S(0.006)GS(0.002)S(0.002)IFDRPSASSHSTR
gi|472582208	RHTO_03948	64	inositol-hexakisphosphate kinase	2	S	SGKTMRTRTRSGSPASSPGQSSSGSSIFDRP	X;X;X;X;X;X;X;X;X;X;X;X;Phospho (STY);X;X;Phospho (STY);X;X;X;X;X;X;X;X;X;X;X;X;X;X;X	XXXXXXXXXXPPPPPPPPPPPPPPPPPPPPP	0.00839672	64.594	64.594	_SGS(ph)PAS(ph)SPGQSSSGSSIFDRPSASSHSTR_	S(0.19)GS(0.809)PAS(0.732)S(0.245)PGQS(0.008)S(0.007)S(0.006)GS(0.002)S(0.002)IFDRPSASSHSTR
gi|472582208	RHTO_03948	407	inositol-hexakisphosphate kinase	1;2	S	PRLSFDASKSNTPSHSPPLGRRHTRTKDDGS;PRLSFDASKSNTPSHSPPLGRRHTRTKDDNS	X;X;X;X;X;X;X;X;X;X;X;Phospho (STY);X;X;X;Phospho (STY);X;X;X;X;X;X;X;X;X;X;X;X;X;X;X	XXXXXXXXXPPPPPPPPPPPPXXXXXXXXXX	0.0005035	144.97	105.99	_SNTPSHS(ph)PPLGR_	SNTPS(0.001)HS(0.999)PPLGR
gi|472582208	RHTO_03948	230	inositol-hexakisphosphate kinase		S	PSRPPSRLGTRSPSVSSHPFPASPSKSFHQH	X;X;X;X;X;X;X;X;X;X;X;X;X;X;X;Phospho (STY);X;X;X;X;X;X;X;X;X;X;X;X;X;X;X	XXXXXXXXXXXPPPPPPPPPPPPPPPXXXXX	0.00911949	72.315	72.315	_SPSVS(ph)SHPFPASPSK_	S(0.003)PS(0.09)VS(0.454)S(0.454)HPFPASPSK
gi|472582208	RHTO_03948	231	inositol-hexakisphosphate kinase		S	SRPPSRLGTRSPSVSSHPFPASPSKSFHQHQ	X;X;X;X;X;X;X;X;X;X;X;X;X;X;X;X;X;X;X;X;X;X;X;X;X;X;X;X;X;X;X	XXXXXXXXXXXXXXXXXXXXXXXXXXXXXXX	0.00911949	72.315	72.315	_SPSVS(ph)SHPFPASPSK_	S(0.003)PS(0.09)VS(0.454)S(0.454)HPFPASPSK
gi|472582218	RHTO_03958	354	phosphate system cyclin PHO80	1	S	TGSSISRSTSYSIASSPQRGRTRGRERPPSS	X;X;X;X;X;X;X;X;X;X;X;X;X;X;X;Phospho (STY);X;X;X;X;X;X;X;X;X;X;X;X;X;X;X	XXXXXXXPPPPPPPPPPPPXXXXXXXXXXXX	1.17e-235	268.9	242.07	_STSYSIASS(ph)PQR_	STSYSIAS(0.012)S(0.988)PQR
gi|472584552	RHTO_00892	552	pseudouridylate synthase	1	S	PLPMPRARSTRLRPASPPRQEPSSAPAGLYD	X;X;X;X;X;X;X;X;X;X;X;X;X;X;X;Phospho (STY);X;X;X;X;X;X;X;X;X;X;X;X;X;X;X	XXXXXXXXXXXPPPPPPPPXXXXXXXXXXXX	0.00656725	102.53	102.53	_LRPAS(ph)PPR_	LRPAS(1)PPR
gi|472582250	RHTO_03990	279	hypothetical protein	1	S	SDEDGGSKKKGKKRASSVGSGASKGKGKADK	X;X;X;X;X;X;X;X;X;X;X;X;X;X;X;Phospho (STY);X;X;X;X;X;X;X;X;X;X;X;X;X;X;X	XXXXXXXXXXXXXPPPPPPPPPPPXXXXXXX	0.00499405	80.312	80.312	_RAS(ph)SVGSGASK_	RAS(0.807)S(0.184)VGS(0.01)GASK
gi|472585268	RHTO_07692	809	mitochondrion organization and biogenesis-related protein	2	S	PLHSTLAAAGFKKAPSELSDYFPAATAGARE	X;X;X;X;X;X;X;X;X;X;X;X;X;X;X;Phospho (STY);X;X;Phospho (STY);X;X;X;X;X;X;X;X;X;X;X;X	XXXXXXXXXXXXPPPPPPPPPPPPPPPPPPX	0.00853277	92.211	76.027	_KAPS(ph)ELS(ph)DYFPAATAGAR_	KAPS(0.991)ELS(0.991)DY(0.018)FPAATAGAR
gi|472585268	RHTO_07692	812	mitochondrion organization and biogenesis-related protein	2	S	STLAAAGFKKAPSELSDYFPAATAGAREALA	X;X;X;X;X;X;X;X;X;X;X;X;Phospho (STY);X;X;Phospho (STY);X;X;X;X;X;X;X;X;X;X;X;X;X;X;X	XXXXXXXXXPPPPPPPPPPPPPPPPPPXXXX	0.00853277	92.211	76.027	_KAPS(ph)ELS(ph)DYFPAATAGAR_	KAPS(0.991)ELS(0.991)DY(0.018)FPAATAGAR
gi|472585268	RHTO_07692	447	mitochondrion organization and biogenesis-related protein	1	S	PRVFHTQSQMRVRTGSTGSLTAHGSPSTATA	X;X;X;X;X;X;X;X;X;X;X;X;X;X;X;Phospho (STY);X;X;X;X;X;X;X;X;X;X;X;X;X;X;X	XXXXXXXXXXXXXPPPPPPPPPPPPPPPPPP	0.00595716	70.802	70.802	_TGS(ph)TGSLTAHGSPSTATAR_	T(0.174)GS(0.784)T(0.034)GS(0.007)LTAHGSPSTATAR
gi|472585268	RHTO_07692	456	mitochondrion organization and biogenesis-related protein	1	S	MRVRTGSTGSLTAHGSPSTATARSATGGSTA	X;X;X;X;X;X;X;X;X;X;X;X;X;X;X;Phospho (STY);X;X;X;X;X;X;X;X;X;X;X;X;X;X;X	XXXXPPPPPPPPPPPPPPPPPPPXXXXXXXX	0.0036016	95.954	95.954	_TGSTGSLTAHGS(ph)PSTATAR_	TGS(0.001)T(0.002)GS(0.025)LT(0.017)AHGS(0.952)PS(0.002)T(0.002)ATAR
gi|472585361	RHTO_07785	208	hypothetical protein	2	S	YGGILNSPTLQRALLSPLLSPQRRAASQGSD	X;X;X;X;X;X;X;X;X;X;X;X;X;X;X;Phospho (STY);X;X;X;Phospho (STY);X;X;X;X;X;X;X;X;X;X;X	XXXXXXXXXXXXPPPPPPPPPPPPXXXXXXX	0.000279864	149.22	99.747	_ALLS(ph)PLLS(ph)PQRR_	ALLS(1)PLLS(1)PQRR
gi|472585361	RHTO_07785	212	hypothetical protein	1;2	S	LNSPTLQRALLSPLLSPQRRAASQGSDLSVP	X;X;X;X;X;X;X;X;X;X;X;Phospho (STY);X;X;X;Phospho (STY);X;X;X;X;X;X;X;X;X;X;X;X;X;X;X	XXXXXXXXPPPPPPPPPPPPXXXXXXXXXXX	0.000279864	149.22	99.747	_ALLS(ph)PLLS(ph)PQRR_	ALLS(1)PLLS(1)PQRR
gi|472585361	RHTO_07785	944	hypothetical protein	1	S	DPERLWAQQRRERKTSISSRGEAGWVPPLKT	X;X;X;X;X;X;X;X;X;X;X;X;X;X;X;Phospho (STY);X;X;X;X;X;X;X;X;X;X;X;X;X;X;X	XXXXXXXXXXXXXPPPPPPPXXXXXXXXXXX	0.00857355	115.7	115.7	_KTS(ph)ISSR_	KT(0.003)S(0.991)IS(0.006)SR
gi|472585362	RHTO_07786	489	hypothetical protein	2	S	MMAPTQSQPKQRRRGSSFLRGMPQGDVWV__;TVEMLATAPKQRRRGSSFLRGMPQGDVPPRR	X;X;X;X;X;X;X;X;X;X;X;X;X;X;X;Phospho (STY);Phospho (STY);X;X;X;X;X;X;X;X;X;X;X;X;X;X	XXXXXXXXXXXXXPPPPPPPXXXXXXXXXXX	0.0107095	100.88	90.827	_RGS(ph)S(ph)FLR_	RGS(1)S(1)FLR
gi|472585362	RHTO_07786	490	hypothetical protein	2	S	MAPTQSQPKQRRRGSSFLRGMPQGDVWV___;VEMLATAPKQRRRGSSFLRGMPQGDVPPRRA	X;X;X;X;X;X;X;X;X;X;X;X;X;X;Phospho (STY);Phospho (STY);X;X;X;X;X;X;X;X;X;X;X;X;X;X;X	XXXXXXXXXXXXPPPPPPPXXXXXXXXXXXX	0.0107095	100.88	90.827	_RGS(ph)S(ph)FLR_	RGS(1)S(1)FLR
gi|472585361	RHTO_07785	726	hypothetical protein		S	LLASPGALAATKSPLSPPTVQPISPSVAAIR;LLASPRALAATKSPLSPPTVQPISPSVAAIR	X;X;X;Phospho (STY);X;X;X;X;X;X;X;X;X;X;X;Phospho (STY);X;X;X;X;X;X;X;X;X;X;X;X;X;X;X	XXXXXXXXXXXXPPPPPPPPPPPPPPPPPPP	0.0125097	63.337	63.337	_SPLS(ph)PPTVQPISPSVAAIR_	S(0.066)PLS(0.467)PPT(0.467)VQPISPSVAAIR
gi|472585361	RHTO_07785	734	hypothetical protein	1	S	AATKSPLSPPTVQPISPSVAAIRSYGSSTRS;AATKSPLSPPTVQPISPSVAAIRSYGSTTRS	X;X;X;X;X;X;X;X;X;X;X;X;X;X;X;Phospho (STY);X;X;X;X;X;X;X;X;X;X;X;X;X;X;X	XXXXPPPPPPPPPPPPPPPPPPPXXXXXXXX	0.000248242	112.34	112.34	_SPLSPPTVQPIS(ph)PSVAAIR_	SPLSPPTVQPIS(0.995)PS(0.005)VAAIR
gi|472585365	RHTO_07789	38	Yip1 domain family	1;2	S	FGSTTIQPDLPSGRISPNASPHVRANDQLYS	X;X;X;X;X;X;X;X;X;X;X;X;X;X;X;Phospho (STY);X;X;X;Phospho (STY);X;X;X;X;X;X;X;X;X;X;X	XXXXXXXXXXXXXXPPPPPPPPPPXXXXXXX	6.75e-48	146.11	75.102	_IS(ph)PNAS(ph)PHVR_	IS(1)PNAS(1)PHVR
gi|472585365	RHTO_07789	42	Yip1 domain family	2	S	TIQPDLPSGRISPNASPHVRANDQLYSAEQR	X;X;X;X;X;X;X;X;X;X;X;Phospho (STY);X;X;X;Phospho (STY);X;X;X;X;X;X;X;X;X;X;X;X;X;X;X	XXXXXXXXXXPPPPPPPPPPXXXXXXXXXXX	0.00111399	143.05	75.102	_IS(ph)PNAS(ph)PHVR_	IS(1)PNAS(1)PHVR
gi|472585373	RHTO_07797	829	nuclear export factor	1	S	IAAKGLRRVSLPRAASPATTVAAAALARRQA	X;X;X;X;X;X;X;X;X;X;X;X;X;X;X;Phospho (STY);X;X;X;X;X;X;X;X;X;X;X;X;X;X;X	XXXXXXXXXXXXXPPPPPPPPPPPPPPPXXX	1.25e-06	135.08	135.08	_AAS(ph)PATTVAAAALAR_	AAS(1)PATTVAAAALAR
gi|472585373	RHTO_07797	809	nuclear export factor	1;2	S	APPTLPKTIPSPRRPSATSPIAAKGLRRVSL	X;X;X;X;X;X;X;X;X;X;X;X;X;X;X;Phospho (STY);X;Phospho (STY);X;X;X;X;X;X;X;X;X;X;X;X;X	XXXXXXXXXXXXXPPPPPPPPPPPXXXXXXX	0.000554279	154.46	154.46	_RPS(ph)AT(ph)SPIAAK_	RPS(1)AT(0.5)S(0.5)PIAAK
gi|472585373	RHTO_07797	812	nuclear export factor	2	S	TLPKTIPSPRRPSATSPIAAKGLRRVSLPRA	X;X;X;X;X;X;X;X;X;X;X;X;X;X;X;X;X;X;X;X;X;X;X;X;X;X;X;X;X;X;X	XXXXXXXXXXXXXXXXXXXXXXXXXXXXXXX	0.000554279	154.46	105.39	_RPS(ph)AT(ph)SPIAAK_	RPS(0.994)AT(0.503)S(0.503)PIAAK
gi|472585382	RHTO_07806	706	ER membrane protein involved in regulation of OLE1 transcription, acts with homolog Spt23p	1	S	PRRAATGRSRRGQTDSDDEADAEPAYHAASK	X;X;X;X;X;X;X;X;X;X;X;X;X;X;X;Phospho (STY);X;X;X;X;X;X;X;X;X;X;X;X;X;X;X	XXXXXXXXXXPPPPPPPPPPPPPPPPPPPPP	0.00321678	66.017	66.017	_RGQTDS(ph)DDEADAEPAYHAASK_	RGQT(0.275)DS(0.725)DDEADAEPAYHAASK
gi|472585385	RHTO_07809	709	conserved leucine-rich repeat protein	1	S	RSRRGGRRSSRSFSISPSARRPTPLRSARRP;RSRRGGRRSTRSFSISPSARRPTPLRSARRP	X;X;X;X;X;X;X;X;X;X;X;X;X;X;X;Phospho (STY);X;X;X;X;X;X;X;X;X;X;X;X;X;X;X	XXXXXXXXXXXPPPPPPPPPXXXXXXXXXXX	0.0109673	96.604	96.604	_SFSIS(ph)PSAR_	SFSIS(0.5)PS(0.5)AR
gi|472585385	RHTO_07809	711	conserved leucine-rich repeat protein	1	S	RRGGRRSSRSFSISPSARRPTPLRSARRPPP;RRGGRRSTRSFSISPSARRPTPLRSARRPPP	X;X;X;X;X;X;X;X;X;X;X;X;X;X;X;X;X;X;X;X;X;X;X;X;X;X;X;X;X;X;X	XXXXXXXXXXXXXXXXXXXXXXXXXXXXXXX	0.0109673	96.604	96.604	_SFSIS(ph)PSAR_	SFSIS(0.5)PS(0.5)AR
gi|472585431	RHTO_07856	465	cell wall biogenesis protein phosphatase, Ssd1	1	S	TPTQQARFLEEDPFASGNDSPSGGRTMGHHR;TPTQQPRFLEEDPFASGNDSPSGGRTMGHHR	X;X;X;X;X;X;X;X;X;X;X;X;X;X;X;Phospho (STY);X;X;X;X;X;X;X;X;X;X;X;X;X;X;X	XXXXXXXPPPPPPPPPPPPPPPPPPXXXXXX	1.7e-05	131.33	100.53	_FLEEDPFAS(ph)GNDSPSGGR_	FLEEDPFAS(1)GNDSPSGGR
gi|472585431	RHTO_07856	469	cell wall biogenesis protein phosphatase, Ssd1	1	S	QARFLEEDPFASGNDSPSGGRTMGHHRRQSG;QPRFLEEDPFASGNDSPSGGRTMGHHRRQSG	X;X;X;X;X;X;X;X;X;X;X;X;X;X;X;Phospho (STY);X;X;X;X;X;X;X;X;X;X;X;X;X;X;X	XXXPPPPPPPPPPPPPPPPPPXXXXXXXXXX	6.28e-199	256.58	88.951	_FLEEDPFASGNDS(ph)PSGGR_	FLEEDPFASGNDS(0.997)PS(0.003)GGR
gi|472585431	RHTO_07856	80	cell wall biogenesis protein phosphatase, Ssd1	1	S	RKPQNQQGGGGGAGGSHGRRSSRGGGHAGNG	X;X;X;X;X;X;X;X;X;X;X;X;X;X;X;Phospho (STY);X;X;X;X;X;X;X;X;X;X;X;X;X;X;X	XPPPPPPPPPPPPPPPPPPXXXXXXXXXXXX	0.00407032	81.003	81.003	_KPQNQQGGGGGAGGS(ph)HGR_	KPQNQQGGGGGAGGS(1)HGR
gi|472585431	RHTO_07856	34	cell wall biogenesis protein phosphatase, Ssd1	1	S	DDSRSGQQSNRKQAASPNSPARNRSQHDRKR;DDTQSAQQPTRKQAASPNSPARNRSQHDRKR	X;X;X;X;X;X;X;X;X;X;X;X;X;X;X;Phospho (STY);X;X;X;X;X;X;X;X;X;X;X;X;X;X;X	XXXXXXXXXXXPPPPPPPPPPPXXXXXXXXX	0.000131832	143.94	124.62	_KQAAS(ph)PNSPAR_	KQAAS(1)PNSPAR
gi|472585431	RHTO_07856	37	cell wall biogenesis protein phosphatase, Ssd1	1	S	QSAQQPTRKQAASPNSPARNRSQHDRKRSTS;RSGQQSNRKQAASPNSPARNRSQHDRKRSTS	X;X;X;X;X;X;X;X;X;X;X;X;X;X;X;Phospho (STY);X;X;X;X;X;X;X;X;X;X;X;X;X;X;X	XXXXXXXXPPPPPPPPPPPXXXXXXXXXXXX	0.00457302	81.703	53.3	_KQAASPNS(ph)PAR_	KQAAS(0.108)PNS(0.892)PAR
gi|472585459	RHTO_07884	24	Usp (universal stress protein) family protein	2	S	FDRRRSSSRTRDAQRSVPTSPVGSPPQLQSI	X;X;X;X;X;X;X;X;X;X;X;X;X;X;X;Phospho (STY);X;X;X;Phospho (STY);X;X;X;X;X;X;X;X;X;X;X	XXXXXXXXXXXPPPPPPPPPPPPPPPPPPPP	0.00731342	69.99	69.99	_DAQRS(ph)VPTS(ph)PVGSPPQLQSILK_	DAQRS(0.97)VPT(0.502)S(0.527)PVGSPPQLQSILK
gi|472585459	RHTO_07884	28	Usp (universal stress protein) family protein	2	S	RSSSRTRDAQRSVPTSPVGSPPQLQSILKRH	X;X;X;X;X;X;X;X;X;X;X;Phospho (STY);X;X;X;Phospho (STY);X;X;X;Phospho (STY);X;X;X;X;X;X;X;X;X;X;X	XXXXXXXPPPPPPPPPPPPPPPPPPPPPPXX	2.81e-05	125.78	125.78	_SVPTS(ph)PVGS(ph)PPQLQSILK_	SVPT(0.049)S(0.951)PVGS(0.996)PPQLQS(0.004)ILK
gi|472585459	RHTO_07884	32	Usp (universal stress protein) family protein	2	S	RTRDAQRSVPTSPVGSPPQLQSILKRHPADQ	X;X;X;X;X;X;X;X;X;X;X;Phospho (STY);X;X;X;Phospho (STY);X;X;X;X;X;X;X;X;X;X;X;X;X;X;X	XXXXXXXPPPPPPPPPPPPPPPPPPXXXXXX	2.81e-05	125.78	125.78	_SVPTS(ph)PVGS(ph)PPQLQSILK_	SVPT(0.049)S(0.951)PVGS(0.996)PPQLQS(0.004)ILK
gi|472585472	RHTO_07897	1402	histidine kinase	3	S	SKNLIELMGGSIRLESEYGVGTTMTVDLKLP	X;X;X;X;X;X;X;X;X;X;X;X;X;X;X;Phospho (STY);X;Phospho (STY);X;X;X;X;X;Oxidation (M);Phospho (STY);X;X;X;X;X;X	XXXXXXXXXXXXXPPPPPPPPPPPPPPPPPP	0.0116479	83.871	83.871	_LES(ph)EY(ph)GVGTTM(ox)T(ph)VDLKLPK_	LES(0.597)EY(0.869)GVGT(0.534)T(0.062)MT(0.938)VDLKLPK
gi|472585472	RHTO_07897	312	histidine kinase	1	S	FQNPFSQSTLAQRRGSNASLAASRAAAAGES;FQNPFSQSTLAQRRGSNASLAASRAVAAGES	X;X;X;X;X;X;X;X;X;X;X;X;X;X;X;Phospho (STY);X;X;X;X;X;X;X;X;X;X;X;X;X;X;X	XXXXXXXXXXXXXPPPPPPPPPPPXXXXXXX	0.000566069	141	93.909	_RGS(ph)NASLAASR_	RGS(1)NASLAASR
gi|472585472	RHTO_07897	1622	histidine kinase	2	S	QAGLDDSVPPVRRRPSHPSYGDGSE______;QAGLDESVPPVRRRPSHPSYGDGSE______	X;X;X;X;X;X;X;X;X;X;X;X;X;X;X;Phospho (STY);X;X;Phospho (STY);X;X;X;X;Phospho (STY);X;X;X;X;X;X;X	XXXXXXXXXXXXPPPPPPPPPPPPPXXXXXX	0.00238898	88.133	83.404	_RRPS(ph)HPSYGDGS(ph)E_	RRPS(1)HPS(0.093)Y(0.002)GDGS(0.905)E
gi|472585472	RHTO_07897	1625	histidine kinase	2	S	LDDSVPPVRRRPSHPSYGDGSE_________;LDESVPPVRRRPSHPSYGDGSE_________	X;X;X;X;X;X;X;X;X;X;X;X;Phospho (STY);X;X;Phospho (STY);X;X;X;X;X;X;X;X;X;X;X;X;X;X;X	XXXXXXXXXPPPPPPPPPPPPPXXXXXXXXX	0.0116727	66.673	66.673	_RRPS(ph)HPS(ph)YGDGSE_	RRPS(0.999)HPS(0.735)Y(0.196)GDGS(0.07)E
gi|472585472	RHTO_07897	1630	histidine kinase	2	S	PPVRRRPSHPSYGDGSE______________	X;X;X;X;X;X;X;Phospho (STY);X;X;X;X;X;X;X;Phospho (STY);X;X;X;X;X;X;X;X;X;X;X;X;X;X;X	XXXXPPPPPPPPPPPPPXXXXXXXXXXXXXX	0.00238898	88.133	88.133	_RRPS(ph)HPSYGDGS(ph)E_	RRPS(0.996)HPS(0.003)Y(0.002)GDGS(0.999)E
gi|472583858	RHTO_01534	24	PH domain containing protein	1;3	S	RPRSVATGHTGVSRRSSVTSRQSQLIKKNTG	X;X;X;Phospho (STY);X;X;X;X;X;X;X;X;Phospho (STY);X;X;Phospho (STY);X;X;Phospho (STY);X;X;X;Phospho (STY);X;X;X;X;X;X;X;X	XXXXXXXXXXXXXXPPPPPPPPPPPPPXXXX	0.000685025	130.11	120.11	_RS(ph)SVT(ph)SRQS(ph)QLIK_	RS(0.996)S(0.014)VT(0.681)S(0.472)RQS(0.837)QLIK
gi|472583858	RHTO_01534	25	PH domain containing protein	1;2	S	PRSVATGHTGVSRRSSVTSRQSQLIKKNTGP	X;X;Phospho (STY);X;X;X;X;X;X;X;X;Phospho (STY);X;X;X;Phospho (STY);X;X;X;X;X;Phospho (STY);X;X;X;X;X;X;X;X;X	XXPPPPPPPPPPPPPPPPPPPPPPPPXXXXX	6.24e-06	170.47	111.88	_SVATGHTGVS(ph)RRSS(ph)VTSR_	SVATGHT(0.007)GVS(0.495)RRS(0.495)S(0.979)VT(0.019)S(0.005)R
gi|472583858	RHTO_01534	31	PH domain containing protein	2;3	S	GHTGVSRRSSVTSRQSQLIKKNTGPFELRPS	X;X;X;X;X;Phospho (STY);X;X;Phospho (STY);Phospho (STY);X;Phospho (STY);X;X;X;Phospho (STY);X;X;X;X;X;X;X;X;X;X;X;X;X;X;X	XXXXXXXPPPPPPPPPPPPPXXXXXXXXXXX	0.000685025	130.11	81.625	_RSS(ph)VTSRQS(ph)QLIK_	RS(0.173)S(0.802)VT(0.014)S(0.013)RQS(0.998)QLIK
gi|472583858	RHTO_01534	12	PH domain containing protein	1;2	S	____MEYQQSNNRPRSVATGHTGVSRRSSVT	X;X;X;X;X;X;X;X;X;X;X;X;X;X;X;Phospho (STY);X;X;X;X;X;X;X;X;Phospho (STY);X;X;Phospho (STY);Phospho (STY);X;Phospho (STY)	XXXXXXXXXXXXXXXPPPPPPPPPPPXXXXX	1.19e-13	186.16	186.16	_S(ph)VATGHTGVSR_	S(1)VATGHTGVSR
gi|472583858	RHTO_01534	21	PH domain containing protein	1;2	S	SNNRPRSVATGHTGVSRRSSVTSRQSQLIKK	X;X;X;X;X;X;Phospho (STY);X;X;X;X;X;X;X;X;Phospho (STY);X;X;Phospho (STY);Phospho (STY);X;Phospho (STY);X;X;X;Phospho (STY);X;X;X;X;X	XXXXXXPPPPPPPPPPPPPPPPPPXXXXXXX	7.18e-06	165.86	165.86	_SVATGHTGVS(ph)R_	SVATGHTGVS(1)R
gi|472583858	RHTO_01534	432	PH domain containing protein	1	S	WWNDCKQLSKVYLTASEPFDRSGPVPAAVRS	X;X;X;X;X;X;X;X;X;X;X;X;X;X;X;Phospho (STY);X;X;X;X;X;X;X;X;X;X;X;X;X;X;X	XXXXXXXXXXPPPPPPPPPPPXXXXXXXXXX	0.000899984	109.84	109.84	_VYLTAS(ph)EPFDR_	VYLT(0.016)AS(0.984)EPFDR
gi|472583886	RHTO_01562	254	phosphatase 2a inhibitor i2pp2a	1	S	FDESEDEDPKKEIDLSDEEKRPKKKQRK___	X;X;X;X;X;X;X;X;X;X;X;X;X;X;X;Phospho (STY);X;X;X;X;X;X;X;X;X;X;X;X;X;X;X	XXXXXXXXXXXPPPPPPPPPPPPXXXXXXXX	1.62e-05	162.41	113.4	_EIDLS(ph)DEEKRPK_	EIDLS(1)DEEKRPK
gi|472584946	RHTO_00800	675	periodic tryptophan protein 2	1	S	TEAGPMELIDDRGDLSDLEDRLDKTLPGARS;TEAGPMELIDDRGDLSDLEDRLDKTVPGARS	X;X;X;X;X;Oxidation (M);X;X;X;X;X;X;X;X;X;Phospho (STY);X;X;X;X;X;X;X;X;X;X;X;X;X;X;X	PPPPPPPPPPPPPPPPPPPPPPPPXXXXXXX	0.000558029	119.87	94.532	_GDLS(ph)DLEDRLDK_	GDLS(1)DLEDRLDK
gi|472584933	RHTO_00787	480	u4 tri-SnRNP-associated protein 1	1	S	RSASVAAKREDEGMASVAPQIKAEEVDEPIA	X;X;X;X;X;X;X;X;X;X;X;X;X;Oxidation (M);X;Phospho (STY);X;X;X;X;X;X;X;X;X;X;X;X;X;X;X	XXXXXXXXPPPPPPPPPPPPPPXXXXXXXXX	0.00933285	92.773	92.773	_REDEGM(ox)AS(ph)VAPQIK_	REDEGMAS(1)VAPQIK
gi|472584907	RHTO_00761	729	conserved hypothetical protein	1	S	RGAYGLPDVPESASESPTYPVRDTGAGNLSP	X;X;X;X;X;X;X;X;X;X;X;X;X;X;X;Phospho (STY);X;X;X;X;X;X;X;X;X;X;X;X;X;X;X	XPPPPPPPPPPPPPPPPPPPPPXXXXXXXXX	5.54e-30	175.42	175.42	_GAYGLPDVPESASES(ph)PTYPVR_	GAYGLPDVPES(0.012)AS(0.038)ES(0.933)PT(0.015)Y(0.002)PVR
gi|472584907	RHTO_00761	658	conserved hypothetical protein		S	GSSSSLEREGSSRRGSSSISPTSYSPPNASY	X;X;X;X;X;X;X;X;X;X;X;X;X;X;X;Phospho (STY);X;X;X;X;X;X;X;X;Phospho (STY);X;X;X;X;X;X	XXXXXXXXXXXXXPPPPPPPPPPPPPPPPPP	8.05e-22	137.23	65.365	_RGS(ph)SSISPTSYS(ph)PPNASYATAAAAAR_	RGS(0.48)S(0.417)S(0.106)IS(0.043)PT(0.021)S(0.02)Y(0.098)S(0.776)PPNAS(0.032)Y(0.008)ATAAAAAR
gi|472584907	RHTO_00761	659	conserved hypothetical protein	2	S	SSSSLEREGSSRRGSSSISPTSYSPPNASYA	X;X;X;X;X;X;X;X;X;X;X;X;X;X;X;Phospho (STY);X;X;X;X;X;X;X;Phospho (STY);X;X;X;X;X;X;X	XXXXXXXXXXXXPPPPPPPPPPPPPPPPPPP	8.05e-22	137.23	68.634	_RGSS(ph)SISPTSYS(ph)PPNASYATAAAAAR_	RGS(0.197)S(0.585)S(0.144)IS(0.038)PT(0.017)S(0.034)Y(0.031)S(0.951)PPNASY(0.001)ATAAAAAR
gi|472584907	RHTO_00761	660	conserved hypothetical protein		S	SSSLEREGSSRRGSSSISPTSYSPPNASYAT	X;X;X;X;X;X;X;X;X;X;X;X;X;X;X;X;X;X;X;X;X;X;X;X;X;X;X;X;X;X;X	XXXXXXXXXXXXXXXXXXXXXXXXXXXXXXX	8.05e-22	137.23	69.398	_RGS(ph)SSISPTSYS(ph)PPNASYATAAAAAR_	RGS(0.33)S(0.334)S(0.338)IS(0.095)PT(0.129)S(0.128)Y(0.109)S(0.537)PPNASYATAAAAAR
gi|472584907	RHTO_00761	667	conserved hypothetical protein	1;2	S	GSSRRGSSSISPTSYSPPNASYATAAAAARS	X;X;X;X;X;X;Phospho (STY);Phospho (STY);X;X;X;X;X;X;X;Phospho (STY);X;X;X;X;X;X;X;X;X;X;X;X;X;X;X	XXXXPPPPPPPPPPPPPPPPPPPPPPPPPPX	8.05e-22	137.23	97.312	_RGSSSISPTSYS(ph)PPNASYATAAAAAR_	RGSSSISPT(0.001)S(0.007)Y(0.002)S(0.99)PPNASYATAAAAAR
gi|472584907	RHTO_00761	951	conserved hypothetical protein	1	S	TESDSSGGGNGMLKRSPSSSSLSYARQSLLR;TESDSSGGGSGMLKRSPSSSSLSYARQSLLR	X;X;X;X;X;X;X;X;X;X;X;X;X;X;X;Phospho (STY);X;X;X;X;X;X;X;X;X;X;X;X;X;X;X	XXXXXXXXXXXXXXPPPPPPPPPPPPXXXXX	0.00775731	117.7	117.7	_RS(ph)PSSSSLSYAR_	RS(0.72)PS(0.187)S(0.084)S(0.009)SLSYAR
gi|472584907	RHTO_00761	953	conserved hypothetical protein	1;2	S	SDSSGGGNGMLKRSPSSSSLSYARQSLLRAA;SDSSGGGSGMLKRSPSSSSLSYARQSLLRAA	X;X;X;X;X;X;X;X;X;X;X;X;X;X;X;Phospho (STY);X;Phospho (STY);X;X;X;X;X;X;X;X;X;X;X;X;X	XXXXXXXXXXXXPPPPPPPPPPPPXXXXXXX	7.41e-06	158.98	89.46	_SPS(ph)SSSLSYAR_	SPS(0.998)S(0.002)SSLSYAR
gi|472584907	RHTO_00761	955	conserved hypothetical protein		S	SSGGGNGMLKRSPSSSSLSYARQSLLRAARA;SSGGGSGMLKRSPSSSSLSYARQSLLRAARA	X;X;X;X;X;X;X;X;X;X;X;X;X;Phospho (STY);X;Phospho (STY);X;X;X;X;X;X;X;X;X;X;X;X;X;X;X	XXXXXXXXXXPPPPPPPPPPPPXXXXXXXXX	7.41e-06	158.98	158.98	_RSPS(ph)SS(ph)SLSYAR_	RSPS(0.914)S(0.087)S(0.499)S(0.499)LSYAR
gi|472584907	RHTO_00761	956	conserved hypothetical protein		S	SGGGNGMLKRSPSSSSLSYARQSLLRAARAS;SGGGSGMLKRSPSSSSLSYARQSLLRAARAS	X;X;X;X;X;X;X;X;X;X;X;X;X;X;X;X;X;X;X;X;X;X;X;X;X;X;X;X;X;X;X	XXXXXXXXXXXXXXXXXXXXXXXXXXXXXXX	7.41e-06	158.98	158.98	_RSPS(ph)SS(ph)SLSYAR_	RSPS(0.914)S(0.087)S(0.499)S(0.499)LSYAR
gi|472584907	RHTO_00761	221	conserved hypothetical protein	2	S	SHLVRLNSLNRRTKRSSPVHSPGSSSPERSA	X;X;X;X;X;X;X;Phospho (STY);X;X;X;X;X;X;X;Phospho (STY);X;X;X;X;X;X;X;Phospho (STY);Phospho (STY);X;X;X;X;X;X	XXXXXXXXXXXXXXPPPPPPPPPPPPPPPXX	0.00112298	102.98	60.735	_RS(ph)SPVHSPGSS(ph)SPER_	RS(0.678)S(0.199)PVHS(0.136)PGS(0.197)S(0.645)S(0.145)PER
gi|472584907	RHTO_00761	222	conserved hypothetical protein	2	S	HLVRLNSLNRRTKRSSPVHSPGSSSPERSAA	X;X;X;X;X;X;Phospho (STY);X;X;X;X;X;X;X;X;Phospho (STY);X;X;X;Phospho (STY);X;X;Phospho (STY);X;X;X;X;X;X;X;X	XXXXXXXXXXXXXPPPPPPPPPPPPPPPXXX	2.08e-06	125.73	54.276	_RSS(ph)PVHS(ph)PGSSSPER_	RS(0.014)S(0.98)PVHS(0.953)PGS(0.014)S(0.014)S(0.025)PER
gi|472584907	RHTO_00761	226	conserved hypothetical protein	2	S	LNSLNRRTKRSSPVHSPGSSSPERSAASDSS	X;X;Phospho (STY);X;X;X;X;X;X;X;X;Phospho (STY);X;X;X;Phospho (STY);X;X;X;X;X;X;X;X;X;X;X;Phospho (STY);X;X;X	XXXXXXXXXPPPPPPPPPPPPPPPXXXXXXX	4.41e-05	121.46	54.276	_RSS(ph)PVHS(ph)PGSSSPER_	RS(0.014)S(0.98)PVHS(0.953)PGS(0.014)S(0.014)S(0.025)PER
gi|472584907	RHTO_00761	229	conserved hypothetical protein	1;2	S	LNRRTKRSSPVHSPGSSSPERSAASDSSSAS	X;X;X;X;X;X;X;Phospho (STY);Phospho (STY);X;X;X;X;X;X;Phospho (STY);Phospho (STY);X;X;X;X;X;X;X;Phospho (STY);X;X;X;X;X;X	XXXXXXPPPPPPPPPPPPPPPXXXXXXXXXX	6.35e-34	209.89	125.73	_RSS(ph)PVHSPGS(ph)SSPER_	RS(0.438)S(0.562)PVHSPGS(0.946)S(0.03)S(0.024)PER
gi|472584907	RHTO_00761	230	conserved hypothetical protein	2	S	NRRTKRSSPVHSPGSSSPERSAASDSSSASN;NRRTKRSSPVHSPGSSSPERSAASDSSSAST	X;X;X;X;X;X;Phospho (STY);X;X;X;X;X;X;X;Phospho (STY);Phospho (STY);X;X;X;X;X;X;X;Phospho (STY);X;X;X;X;X;X;X	XXXXXPPPPPPPPPPPPPPPXXXXXXXXXXX	2.67e-33	201.57	60.735	_RS(ph)SPVHSPGSS(ph)SPER_	RS(0.678)S(0.199)PVHS(0.136)PGS(0.197)S(0.645)S(0.145)PER
gi|472584907	RHTO_00761	231	conserved hypothetical protein	2	S	RRTKRSSPVHSPGSSSPERSAASDSSSASNF;RRTKRSSPVHSPGSSSPERSAASDSSSASTF	X;X;X;X;X;X;X;X;X;X;X;X;X;X;X;X;X;X;X;X;X;X;Phospho (STY);X;X;X;X;X;X;X;X	XXXXXXXXXXXXXXXXXXXXXXXXXXXXXXX	2.67e-33	201.57	69.763	_SSPVHSPGS(ph)S(ph)SPER_	SSPVHS(0.465)PGS(0.512)S(0.512)S(0.512)PER
gi|472584872	RHTO_00726	406	sterol O-acyltransferase	1;2	S	ALLRHRQSTARRRSISPSASRTHSSSASSSH	X;X;X;X;X;X;X;X;X;X;X;X;X;Phospho (STY);X;Phospho (STY);X;X;X;X;X;X;X;X;X;X;X;X;X;X;X	XXXXXXXXXXXPPPPPPPPPPXXXXXXXXXX	0.00415885	112.36	88.282	_RRS(ph)IS(ph)PSASR_	RRS(1)IS(1)PSASR
gi|472584865	RHTO_00719	534	26S proteasome non-atpase regulatory subunit 3	1;2	S	RERERELAKEIEEGDSDADLDGPGDMDSF__	X;X;X;X;X;X;X;X;X;X;X;X;X;X;X;Phospho (STY);X;X;X;X;X;X;X;X;X;Oxidation (M);X;Phospho (STY);X;X;X	XXXPPPPPPPPPPPPPPPPPPPPPPPPPPXX	3.28e-45	182.89	164.35	_ERELAKEIEEGDS(ph)DADLDGPGDM(ox)DSF_	ERELAKEIEEGDS(1)DADLDGPGDMDSF
gi|472584865	RHTO_00719	546	26S proteasome non-atpase regulatory subunit 3	2	S	EGDSDADLDGPGDMDSF______________	X;X;X;Phospho (STY);X;X;X;X;X;X;X;X;X;Oxidation (M);X;Phospho (STY);X;X;X;X;X;X;X;X;X;X;X;X;X;X;X	PPPPPPPPPPPPPPPPPXXXXXXXXXXXXXX	0.0052531	75.018	75.018	_ERELAKEIEEGDS(ph)DADLDGPGDM(ox)DS(ph)F_	ERELAKEIEEGDS(1)DADLDGPGDMDS(1)F
gi|472584863	RHTO_00717	948	Rho GTPase-activating protein	1	S	SDIKRMKSVQLDRKLSATTARVPQRSTVIQS	X;X;X;X;X;X;X;X;X;X;X;X;X;X;X;Phospho (STY);X;X;X;X;X;X;X;X;X;X;X;X;X;X;X	XXXXXXXXXXXXXPPPPPPPPXXXXXXXXXX	0.00666823	84.687	63.624	_KLS(ph)ATTAR_	KLS(0.957)AT(0.036)T(0.007)AR
gi|472584838	RHTO_00692	669	anucleate primary sterigmata protein A	1	S	DEEPSPASTRTRADDSFDIDSPTRALDSSVL	X;X;X;X;X;X;X;X;X;X;X;X;X;X;X;Phospho (STY);X;X;X;X;X;X;X;X;X;X;X;X;X;X;X	XXXXXXXXXXXXPPPPPPPPPPPPXXXXXXX	0.0115951	105.14	105.14	_ADDS(ph)FDIDSPTR_	ADDS(1)FDIDSPTR
gi|472588046	RHTO_03271	1263	microtubule associated protein	2	S	RAAASASSSRPASTVSTSSAASVKEPPFRSS	X;X;X;X;X;X;X;X;X;X;X;X;X;X;X;Phospho (STY);X;X;X;X;X;Phospho (STY);X;X;X;X;X;X;X;X;X	XPPPPPPPPPPPPPPPPPPPPPPPPPPPPXX	0.000303004	75.3	57.238	_AAASASSSRPASTVS(ph)TSSAAS(ph)VKEPPFR_	AAASAS(0.003)S(0.003)S(0.002)RPAS(0.003)T(0.003)VS(0.705)T(0.232)S(0.207)S(0.207)AAS(0.636)VKEPPFR
gi|472588046	RHTO_03271	1265	microtubule associated protein		S	AASASSSRPASTVSTSSAASVKEPPFRSSDP	X;X;X;X;X;X;X;X;X;X;X;X;X;X;X;Phospho (STY);X;X;X;X;X;X;X;X;X;X;X;X;X;X;X	PPPPPPPPPPPPPPPPPPPPPPPPPPPXXXX	0.00456176	64.028	64.028	_AAASASSSRPASTVSTS(ph)SAASVKEPPFR_	AAASASSSRPAS(0.002)T(0.002)VS(0.012)T(0.01)S(0.324)S(0.324)AAS(0.324)VKEPPFR
gi|472588046	RHTO_03271	1266	microtubule associated protein	2	S	ASASSSRPASTVSTSSAASVKEPPFRSSDPN	X;X;X;X;X;X;X;X;X;X;X;X;X;X;X;Phospho (STY);X;X;Phospho (STY);X;X;X;X;X;X;X;X;X;X;X;X	PPPPPPPPPPPPPPPPPPPPPPPPPPXXXXX	0.000625236	71.682	71.682	_AAASASSSRPASTVSTSS(ph)AAS(ph)VKEPPFR_	AAAS(0.001)ASSSRPAST(0.001)VS(0.004)T(0.004)S(0.051)S(0.945)AAS(0.993)VKEPPFR
gi|472588046	RHTO_03271	1269	microtubule associated protein	2	S	SSSRPASTVSTSSAASVKEPPFRSSDPNPKL	X;X;X;X;X;X;X;X;X;Phospho (STY);X;X;Phospho (STY);X;X;Phospho (STY);X;X;X;X;X;X;X;X;X;X;X;X;X;X;X	PPPPPPPPPPPPPPPPPPPPPPPXXXXXXXX	0.000303004	75.3	71.682	_AAASASSSRPASTVSTSS(ph)AAS(ph)VKEPPFR_	AAAS(0.001)ASSSRPAST(0.001)VS(0.004)T(0.004)S(0.051)S(0.945)AAS(0.993)VKEPPFR
gi|472588046	RHTO_03271	1187	microtubule associated protein	1	S	PAAPAARQAAPPARLSDPPTAPAAPSAPQPR;SAAPAARQAAPPARLSDPPTAPAAPSAPQPR	X;X;X;X;X;X;X;X;X;X;X;X;X;X;X;Phospho (STY);X;X;X;X;X;X;X;X;X;X;X;X;X;X;X	XXXXXXXPPPPPPPPPPPPPPPPPPPPPPPP	1.91e-05	104.38	103.9	_QAAPPARLS(ph)DPPTAPAAPSAPQPR_	QAAPPARLS(1)DPPTAPAAPSAPQPR
gi|472588039	RHTO_03264	483	fumarylacetoacetate hydrolase	1	S	VDAVSTAGCSAKTNSSRPLSKAAVRASLLAS	X;X;X;X;X;X;X;X;X;X;X;X;X;X;X;Phospho (STY);X;X;X;X;X;X;X;X;X;X;X;X;X;X;X	XXXXXXXXXXXXPPPPPPPPPXXXXXXXXXX	0.0129421	78.516	78.516	_TNSS(ph)RPLSK_	T(0.003)NS(0.08)S(0.917)RPLSK
gi|472588034	RHTO_03259	563	Glycoside Hydrolase Family 16 protein, CBM8 containing	1	S	ISKNSMGNNYRDRIVSPSSSSFRTATPPVPS	X;X;X;X;X;X;X;X;X;X;X;X;X;X;X;Phospho (STY);X;X;X;X;X;X;X;X;X;X;X;X;X;X;X	XXXXXXXXXXXXXPPPPPPPPPPXXXXXXXX	0.00546929	92.19	92.19	_IVS(ph)PSSSSFR_	IVS(0.77)PS(0.072)S(0.072)S(0.072)S(0.013)FR
gi|472587985	RHTO_03210	18	C-type cyclin	1	S	QLAGVPEPRPPRNPDSPPPLAVTRSFRPFYS	X;X;X;X;X;X;X;X;X;X;X;X;X;X;X;Phospho (STY);X;X;X;X;X;X;X;X;X;X;X;X;X;X;X	XXXXXXXXXXXXPPPPPPPPPPPPXXXXXXX	0.00196662	91.616	91.616	_NPDS(ph)PPPLAVTR_	NPDS(1)PPPLAVTR
gi|472587958	RHTO_03183	1740	RTA-like protein, two-component response regulator	1	S	SHSEHHDADMVSHSRSIDHSDIYARSQLATE	X;X;X;X;X;X;X;X;X;X;X;X;X;X;X;Phospho (STY);X;X;X;X;X;X;X;X;X;X;X;X;X;X;X	XXXXXXXXXXXXXXXPPPPPPPPPPXXXXXX	0.00286301	112.43	108.72	_S(ph)IDHSDIYAR_	S(1)IDHSDIYAR
gi|472587946	RHTO_03171	170	conserved hypothetical protein	1;2	S	PSASSAARSTASRARSVSVDPVTDRLQSSPT;PSASSAARSTTSRARSVSVDPVTDRLQSSPT	X;Phospho (STY);X;Phospho (STY);X;X;X;X;X;X;X;X;X;X;X;Phospho (STY);X;Phospho (STY);X;X;X;X;Phospho (STY);X;X;X;X;Phospho (STY);Phospho (STY);X;Phospho (STY)	XXXXXXXXXXXXXPPPPPPPPPPPPXXXXXX	3.29e-20	190.55	142.58	_ARS(ph)VS(ph)VDPVTDR_	ARS(1)VS(0.984)VDPVT(0.016)DR
gi|472587946	RHTO_03171	172	conserved hypothetical protein	2	S	ASSAARSTASRARSVSVDPVTDRLQSSPTAN;ASSAARSTTSRARSVSVDPVTDRLQSSPTAN	X;Phospho (STY);X;X;X;X;X;X;X;X;X;X;X;Phospho (STY);X;Phospho (STY);X;X;X;X;X;X;X;X;X;Phospho (STY);Phospho (STY);X;Phospho (STY);X;X	XXXXXXXXXXXPPPPPPPPPPPPXXXXXXXX	0.00175747	142.58	79.393	_ARS(ph)VS(ph)VDPVTDR_	ARS(1)VS(1)VDPVTDR
gi|472587946	RHTO_03171	156	conserved hypothetical protein		S	VAEDSPDPLRIIAVPSASSAARSTASRARSV;VAEDSPDPLRIIAVPSASSAARSTTSRARSV	X;X;X;X;Phospho (STY);X;X;X;X;X;X;X;X;X;X;Phospho (STY);X;X;X;X;X;X;X;X;X;X;X;X;X;Phospho (STY);X	XXXXXXXXXXPPPPPPPPPPPPXXXXXXXXX	0.00402154	83.692	83.692	_IIAVPS(ph)ASSAAR_	IIAVPS(0.381)AS(0.381)S(0.237)AAR
gi|472587946	RHTO_03171	158	conserved hypothetical protein		S	EDSPDPLRIIAVPSASSAARSTASRARSVSV;EDSPDPLRIIAVPSASSAARSTTSRARSVSV	X;X;Phospho (STY);X;X;X;X;X;X;X;X;X;X;X;X;Phospho (STY);X;X;X;X;X;X;X;X;X;X;X;Phospho (STY);X;Phospho (STY);X	XXXXXXXXPPPPPPPPPPPPXXXXXXXXXXX	0.000149425	127.32	127.32	_IIAVPSAS(ph)SAAR_	IIAVPS(0.04)AS(0.48)S(0.48)AAR
gi|472587946	RHTO_03171	159	conserved hypothetical protein		S	DSPDPLRIIAVPSASSAARSTASRARSVSVD;DSPDPLRIIAVPSASSAARSTTSRARSVSVD	X;Phospho (STY);X;X;X;X;X;X;X;X;X;X;X;X;X;X;X;X;X;X;X;X;X;X;X;X;Phospho (STY);X;Phospho (STY);X;X	XXXXXXXXXXXXXXXXXXXXXXXXXXXXXXX	0.000149425	127.32	127.32	_IIAVPSAS(ph)SAAR_	IIAVPS(0.04)AS(0.48)S(0.48)AAR
gi|472587946	RHTO_03171	182	conserved hypothetical protein	1	S	RARSVSVDPVTDRLQSSPTANYKRHRSKTPI;RARSVSVDPVTDRLQSSPTANYKRQRSKTPI	X;X;X;Phospho (STY);X;Phospho (STY);X;X;X;X;Phospho (STY);X;X;X;X;Phospho (STY);X;X;X;X;X;X;X;X;X;X;X;X;Phospho (STY);X;X	XXXXXXXXXXXXXPPPPPPPPPPPXXXXXXX	0.00986241	88.101	88.101	_LQS(ph)SPTANYKR_	LQS(0.972)S(0.028)PTANYKR
gi|472587946	RHTO_03171	183	conserved hypothetical protein	1	S	ARSVSVDPVTDRLQSSPTANYKRHRSKTPIT;ARSVSVDPVTDRLQSSPTANYKRQRSKTPIT	X;X;Phospho (STY);X;Phospho (STY);X;X;X;X;Phospho (STY);X;X;X;X;X;Phospho (STY);X;X;X;X;X;X;X;X;X;X;X;Phospho (STY);X;X;X	XXXXXXXXXXXXPPPPPPPPPPPXXXXXXXX	0.00263432	115.34	115.34	_LQSS(ph)PTANYK_	LQS(0.055)S(0.942)PT(0.003)ANYK
gi|472587934	RHTO_03158	497	hypothetical protein	1	S	APLPSAPPPAAIPRSSPPLSNPNRYSTRVDS	X;X;X;X;X;X;X;X;X;X;X;X;X;X;X;Phospho (STY);X;X;X;X;X;X;X;X;X;X;X;X;X;X;X	XXXXXXXXXXXXXXPPPPPPPPPPXXXXXXX	0.00860703	95.273	95.273	_SS(ph)PPLSNPNR_	S(0.058)S(0.942)PPLSNPNR
gi|472587930	RHTO_03154	514	3-deoxy-9-phosphoheptulonate synthase	1	S	RDHQRILDELASRPGSVDSRVKQ________	X;X;X;X;X;X;X;X;X;X;X;X;X;X;X;Phospho (STY);X;X;X;X;X;X;X;X;X;X;X;X;X;X;X	XXXXXPPPPPPPPPPPPPPPXXXXXXXXXXX	5.1e-07	150.68	134.52	_ILDELASRPGS(ph)VDSR_	ILDELASRPGS(1)VDSR
gi|472587893	RHTO_03117	270	adenylate kinase	1	S	YYKKKGIWTGVDAAQSPKTVWASLSKIFEET	X;X;X;X;X;X;X;X;X;X;X;X;X;X;X;Phospho (STY);X;X;X;X;X;X;X;X;X;X;X;X;X;X;X	XXXXPPPPPPPPPPPPPPXXXXXXXXXXXXX	0.0107728	87.498	87.498	_KGIWTGVDAAQS(ph)PK_	KGIWTGVDAAQS(1)PK
gi|472587871	RHTO_03095	70	GYF domain containing protein	2;4	S	GPSRKRNKVTTEGYDSDSSAESDGGFGGAGG	X;X;X;X;X;X;X;X;X;X;X;X;X;X;X;Phospho (STY);X;Phospho (STY);Phospho (STY);X;X;Phospho (STY);X;X;X;X;X;X;X;X;X	XXXXXXPPPPPPPPPPPPPPPPPPPPPPPPP	3.4e-20	134.05	134.05	_NKVTTEGYDS(ph)DSSAES(ph)DGGFGGAGGGR_	NKVTT(0.002)EGY(0.025)DS(0.957)DS(0.015)S(0.001)AES(1)DGGFGGAGGGR
gi|472587871	RHTO_03095	72	GYF domain containing protein	1;4	S	SRKRNKVTTEGYDSDSSAESDGGFGGAGGGR	X;X;X;X;X;X;X;X;X;X;X;X;X;Phospho (STY);X;Phospho (STY);Phospho (STY);X;X;Phospho (STY);X;X;X;X;X;X;X;X;X;X;X	XXXXPPPPPPPPPPPPPPPPPPPPPPPPPPP	0.00185315	73.389	55.827	_NKVTTEGYDS(ph)DS(ph)S(ph)AES(ph)DGGFGGAGGGR_	NKVT(0.294)T(0.294)EGY(0.21)DS(0.66)DS(0.789)S(0.789)AES(0.965)DGGFGGAGGGR
gi|472587871	RHTO_03095	73	GYF domain containing protein	2;4	S	RKRNKVTTEGYDSDSSAESDGGFGGAGGGRA	X;X;X;X;X;X;X;X;X;X;X;X;Phospho (STY);X;Phospho (STY);Phospho (STY);X;X;Phospho (STY);X;X;X;X;X;X;X;X;X;X;X;X	XXXPPPPPPPPPPPPPPPPPPPPPPPPPPPX	4.08e-08	111.89	111.89	_NKVTTEGYDS(ph)DSS(ph)AESDGGFGGAGGGR_	NKVT(0.059)T(0.045)EGY(0.029)DS(0.81)DS(0.091)S(0.935)AES(0.031)DGGFGGAGGGR
gi|472587871	RHTO_03095	76	GYF domain containing protein	2;4	S	NKVTTEGYDSDSSAESDGGFGGAGGGRAGRG	X;X;X;X;X;X;X;X;X;Phospho (STY);X;Phospho (STY);Phospho (STY);X;X;Phospho (STY);X;X;X;X;X;X;X;X;X;X;X;X;X;X;X	PPPPPPPPPPPPPPPPPPPPPPPPPPPXXXX	3.4e-20	134.05	134.05	_NKVTTEGYDS(ph)DSSAES(ph)DGGFGGAGGGR_	NKVTT(0.002)EGY(0.025)DS(0.957)DS(0.015)S(0.001)AES(1)DGGFGGAGGGR
gi|472587849	RHTO_03073	206	nitrogen permease regulator 3	1;2	S	LPPHARALLIPERDDSPSPRRPDALAHTHSS	X;X;X;X;X;X;X;X;X;X;X;X;X;X;X;Phospho (STY);X;Phospho (STY);X;X;X;X;X;X;X;X;X;X;X;X;X	XXXXXXPPPPPPPPPPPPPPXXXXXXXXXXX	3.81e-121	234.04	106.75	_ALLIPERDDS(ph)PS(ph)PR_	ALLIPERDDS(1)PS(1)PR
gi|472587849	RHTO_03073	208	nitrogen permease regulator 3	1;2	S	PHARALLIPERDDSPSPRRPDALAHTHSSAS	X;X;X;X;X;X;X;X;X;X;X;X;X;Phospho (STY);X;Phospho (STY);X;X;X;X;X;X;X;X;X;X;X;X;X;X;X	XXXXPPPPPPPPPPPPPPXXXXXXXXXXXXX	1.33e-17	178	106.75	_ALLIPERDDS(ph)PS(ph)PR_	ALLIPERDDS(1)PS(1)PR
gi|472587849	RHTO_03073	393	nitrogen permease regulator 3	2	S	PDKGDESNSPERRNRSVSPSGHAFPRTRQAP	X;X;X;X;X;X;X;X;X;X;X;X;X;X;X;Phospho (STY);X;Phospho (STY);X;Phospho (STY);X;X;X;X;X;X;X;X;X;X;X	XXXXXXXXXXXXXPPPPPPPPPPPPPXXXXX	0.0001688	126.25	126.25	_NRS(ph)VS(ph)PSGHAFPR_	NRS(1)VS(0.997)PS(0.003)GHAFPR
gi|472587849	RHTO_03073	395	nitrogen permease regulator 3	1;2	S	KGDESNSPERRNRSVSPSGHAFPRTRQAPIF	X;X;X;X;X;X;X;X;X;X;X;X;X;Phospho (STY);X;Phospho (STY);X;Phospho (STY);X;X;X;X;X;X;X;X;X;X;X;X;X	XXXXXXXXXXXPPPPPPPPPPPPPXXXXXXX	0.0001688	126.25	126.25	_NRS(ph)VS(ph)PSGHAFPR_	NRS(1)VS(0.997)PS(0.003)GHAFPR
gi|472587849	RHTO_03073	397	nitrogen permease regulator 3	2	S	DESNSPERRNRSVSPSGHAFPRTRQAPIFST	X;X;X;X;X;X;X;X;X;X;X;Phospho (STY);X;Phospho (STY);X;Phospho (STY);X;X;X;X;X;X;X;X;X;X;X;X;X;X;X	XXXXXXXXXPPPPPPPPPPPPPXXXXXXXXX	0.00294122	110.74	107.65	_SVS(ph)PS(ph)GHAFPR_	S(0.391)VS(0.751)PS(0.859)GHAFPR
gi|472587834	RHTO_03058	844	glycerol-3-phosphate O-acyltransferase / dihydroxyacetone phosphate acyltransferase	2	S	DEVIHILNREQGRPDSPLPSPRPGLYRRVSR	X;X;X;X;X;X;X;X;X;X;X;X;X;X;X;Phospho (STY);X;X;X;Phospho (STY);X;X;X;X;X;X;X;X;X;X;X	XXXXXXXXXPPPPPPPPPPPPPPPPPPXXXX	0.00559188	76.807	59.814	_EQGRPDS(ph)PLPS(ph)PRPGLYR_	EQGRPDS(1)PLPS(0.979)PRPGLY(0.021)R
gi|472587834	RHTO_03058	848	glycerol-3-phosphate O-acyltransferase / dihydroxyacetone phosphate acyltransferase	2	S	HILNREQGRPDSPLPSPRPGLYRRVSRQRSR	X;X;X;X;X;X;X;X;X;X;X;Phospho (STY);X;X;X;Phospho (STY);X;X;X;X;X;X;X;X;X;X;X;X;X;X;X	XXXXXPPPPPPPPPPPPPPPPPPXXXXXXXX	0.00559188	76.807	60.171	_EQGRPDS(ph)PLPS(ph)PRPGLYR_	EQGRPDS(1)PLPS(0.998)PRPGLY(0.002)R
gi|472587826	RHTO_03050	327	phospholipid-translocating ATPase	1	S	GSAKGRSRANTSAGLSYEAPIPARHQRLEGD	X;X;X;X;X;X;X;X;X;X;X;X;X;X;X;Phospho (STY);X;X;X;X;X;X;X;X;X;X;X;X;X;X;X	XXXXXXXXPPPPPPPPPPPPPPPPXXXXXXX	7.08e-07	130.37	130.37	_ANTSAGLS(ph)YEAPIPAR_	ANTSAGLS(1)YEAPIPAR
gi|472587811	RHTO_03035	532	zinc finger, PHD-type protein	1;2	S	APGGTPGGPSRSRGGSPSLSPAPKATELVVT;APGGTPSGPSRSRGGSPSLSPAPKATELVVT	X;X;X;X;X;X;Phospho (STY);X;X;X;X;Phospho (STY);X;X;X;Phospho (STY);X;Phospho (STY);X;X;X;X;X;X;X;X;X;X;X;X;X	XXXXXXXXXXXPPPPPPPPPPPPPXXXXXXX	0.000707208	119.92	109.1	_GGS(ph)PS(ph)LSPAPK_	GGS(1)PS(0.993)LS(0.007)PAPK
gi|472587811	RHTO_03035	534	zinc finger, PHD-type protein	2	S	GGTPGGPSRSRGGSPSLSPAPKATELVVTSK;GGTPSGPSRSRGGSPSLSPAPKATELVVTSK	X;X;X;X;Phospho (STY);X;X;X;X;Phospho (STY);X;X;X;Phospho (STY);X;Phospho (STY);X;X;X;X;X;X;X;X;X;X;X;X;X;X;X	XXXXXXXXXPPPPPPPPPPPPPXXXXXXXXX	0.00481314	109.1	109.1	_GGS(ph)PS(ph)LSPAPK_	GGS(1)PS(0.993)LS(0.007)PAPK
gi|472587811	RHTO_03035	536	zinc finger, PHD-type protein	2	S	TPGGPSRSRGGSPSLSPAPKATELVVTSKED;TPSGPSRSRGGSPSLSPAPKATELVVTSKED	X;X;Phospho (STY);X;X;X;X;Phospho (STY);X;X;X;X;X;X;X;Phospho (STY);X;X;X;X;X;X;X;X;X;X;X;X;X;X;X	XXXXXXXPPPPPPPPPPPPPXXXXXXXXXXX	0.00628028	103.75	103.75	_S(ph)RGGSPSLS(ph)PAPK_	S(0.621)RGGS(0.378)PS(0.001)LS(1)PAPK
gi|472587811	RHTO_03035	528	zinc finger, PHD-type protein	1;2	S	PAAAAPGGTPSGPSRSRGGSPSLSPAPKATE;PTAAAPGGTPGGPSRSRGGSPSLSPAPKATE	X;X;X;X;X;X;X;X;X;X;Phospho (STY);X;X;X;X;Phospho (STY);X;X;X;Phospho (STY);X;Phospho (STY);X;Phospho (STY);X;X;X;X;X;X;X	XXXXXXXXXXXXXXXPPPPPPPPPPPPPXXX	0.000707208	119.92	102.89	_S(ph)RGGS(ph)PSLSPAPK_	S(1)RGGS(0.978)PS(0.021)LS(0.001)PAPK
gi|472587810	RHTO_03034	1067	hypothetical protein	1	S	GSLAAFPTALKVVPLSPALK___________	X;X;X;X;X;X;X;X;X;X;X;X;X;X;X;Phospho (STY);X;X;X;X;X;X;X;X;X;X;X;X;X;X;X	XXXXXXXXXXXPPPPPPPPPXXXXXXXXXXX	3.07e-06	103.22	103.22	_VVPLS(ph)PALK_	VVPLS(1)PALK
gi|472587806	RHTO_03030	725	Sit4-associated protein		S	ALEKAETPTLQDRRRSRQSLSADDERDLPPT	X;X;X;X;X;X;X;X;X;X;X;X;X;X;X;Phospho (STY);X;X;X;X;X;X;X;X;X;X;X;X;X;X;X	XXXXXXXXXXXXXXXPPPPPPPPPPPPPPPP	0.00453088	72.167	71.295	_S(ph)RQSLSADDERDLPPTPSVYSETSR_	S(0.495)RQS(0.495)LS(0.009)ADDERDLPPTPSVYSETSR
gi|472587806	RHTO_03030	728	Sit4-associated protein		S	KAETPTLQDRRRSRQSLSADDERDLPPTPSV	X;X;X;X;X;X;X;X;X;X;X;X;X;X;X;X;X;X;X;X;X;X;X;X;X;X;X;X;X;X;X	XXXXXXXXXXXXXXXXXXXXXXXXXXXXXXX	0.00453088	72.167	71.295	_S(ph)RQSLSADDERDLPPTPSVYSETSR_	S(0.495)RQS(0.495)LS(0.009)ADDERDLPPTPSVYSETSR
gi|472587806	RHTO_03030	730	Sit4-associated protein		S	ETPTLQDRRRSRQSLSADDERDLPPTPSVYS	X;X;X;X;X;X;X;X;X;X;X;X;X;X;X;X;X;X;X;X;X;X;X;X;X;X;X;X;X;X;X	XXXXXXXXXXXXXXXXXXXXXXXXXXXXXXX	0.00453088	72.167	72.167	_S(ph)RQSLSADDERDLPPTPSVYSETSR_	S(0.333)RQS(0.333)LS(0.333)ADDERDLPPTPSVYSETSR
gi|472587785	RHTO_03009	41	Nucleic acid-binding, OB-fold-like domain protein	1	S	PASAWQTFTFRLAPPSSPRSSSKGVRGGQDA	X;X;X;X;X;X;X;X;X;X;X;X;X;X;X;Phospho (STY);X;X;X;X;X;X;X;X;X;X;X;X;X;X;X	XXXXXXXXXXXPPPPPPPPXXXXXXXXXXXX	0.00453029	119.75	88.495	_LAPPS(ph)SPR_	LAPPS(0.5)S(0.5)PR
gi|472587785	RHTO_03009	42	Nucleic acid-binding, OB-fold-like domain protein	1	S	ASAWQTFTFRLAPPSSPRSSSKGVRGGQDAK	X;X;X;X;X;X;X;X;X;X;X;X;X;X;X;X;X;X;X;X;X;X;X;X;X;X;X;X;X;X;X	XXXXXXXXXXXXXXXXXXXXXXXXXXXXXXX	0.00453029	119.75	88.495	_LAPPS(ph)SPR_	LAPPS(0.5)S(0.5)PR
gi|472587767	RHTO_02991	991	CDK inhibitor PHO81		S	VYKSIQTSPSSSEPESSTAHRRVVLSSFNPV	X;X;X;X;X;X;X;X;X;X;X;X;X;X;X;Phospho (STY);X;X;X;X;X;X;X;X;X;X;X;X;X;X;X	XXXPPPPPPPPPPPPPPPPPPXXXXXXXXXX	0.000746187	108.34	108.34	_SIQTSPSSSEPES(ph)STAHR_	SIQTSPSSSEPES(0.441)S(0.279)T(0.279)AHR
gi|472587767	RHTO_02991	992	CDK inhibitor PHO81	1	S	YKSIQTSPSSSEPESSTAHRRVVLSSFNPVV	X;X;X;X;X;X;X;X;X;X;X;X;X;X;X;Phospho (STY);X;X;X;X;X;X;X;X;X;X;X;X;X;X;X	XXPPPPPPPPPPPPPPPPPPXXXXXXXXXXX	0.00286645	95.624	95.624	_SIQTSPSSSEPESS(ph)TAHR_	SIQTSPSSSEPES(0.027)S(0.749)T(0.225)AHR
gi|472587766	RHTO_02990	403	ubiquitin system component Cue	1	S	VRSPLSAPNHALGDDSDDELEYQRNPFDED_	X;X;X;X;X;X;X;X;X;X;X;X;X;X;X;Phospho (STY);X;X;X;X;X;X;X;X;X;X;X;X;X;X;X	XXPPPPPPPPPPPPPPPPPPPPPPPPPPPPX	2.28e-43	177	169.13	_SPLSAPNHALGDDS(ph)DDELEYQR_	SPLSAPNHALGDDS(1)DDELEYQR
gi|472587765	RHTO_02988	481	methylenetetrahydrofolate dehydrogenase (NADP+) / methenyltetrahydrofolate cyclohydrolase / formyltetrahydrofolate synthetase	1	S	GAHLGKAAYACVRQPSQGPTFGIKGGAAGGG	X;X;X;X;X;X;X;X;X;X;X;X;X;X;X;Phospho (STY);X;X;X;X;X;X;X;X;X;X;X;X;X;X;X	XXXXXXXXXXXXXPPPPPPPPPPPXXXXXXX	0.00560477	84.759	84.759	_QPS(ph)QGPTFGIK_	QPS(1)QGPTFGIK
gi|472587731	RHTO_02955	236	transcription initiation factor TFIID subunit 6	1	S	RAEQVQFEMLDYDVPSDDEDYDPTQRRNDTE	X;X;X;X;X;X;X;X;Oxidation (M);X;X;X;X;X;X;Phospho (STY);X;X;X;X;X;X;X;X;X;X;X;X;X;X;X	XPPPPPPPPPPPPPPPPPPPPPPPPPPXXXX	3.42e-07	104.91	104.91	_AEQVQFEM(ox)LDYDVPS(ph)DDEDYDPTQRR_	AEQVQFEMLDYDVPS(1)DDEDYDPTQRR
gi|472587731	RHTO_02955	31	transcription initiation factor TFIID subunit 6	1	S	RPRRTRRPNRIAAQGSDDEYGGGRRLRVRVG	X;X;X;X;X;X;X;X;X;X;X;X;X;X;X;Phospho (STY);X;X;X;X;X;X;X;X;X;X;X;X;X;X;X	XXXXXXXXXXPPPPPPPPPPPPPPPXXXXXX	5.02e-25	192.62	97.095	_IAAQGS(ph)DDEYGGGRR_	IAAQGS(1)DDEYGGGRR
gi|472587695	RHTO_02919	93	hypothetical protein	1	S	AATPAKKTPQIVYATSPGTKATIATLVATVK	X;X;X;X;X;X;X;X;X;X;X;X;X;X;X;Phospho (STY);X;X;X;X;X;X;X;X;X;X;X;X;X;X;X	XXXXXXPPPPPPPPPPPPPPXXXXXXXXXXX	0.00480726	102.65	102.65	_TPQIVYATS(ph)PGTK_	TPQIVYAT(0.024)S(0.976)PGTK
gi|472587691	RHTO_02915	1084	hypothetical protein	1	S	YGRPLTPADERMEGDSDEEYDELDRMMAPVW	X;X;X;X;X;X;X;X;X;X;X;Oxidation (M);X;X;X;Phospho (STY);X;X;X;X;X;X;X;X;X;X;X;X;X;X;X	PPPPPPPPPPPPPPPPPPPPPPPPPXXXXXX	0.00230911	72.082	72.082	_GGGGQYGRPLTPADERM(ox)EGDS(ph)DEEYDELDR_	GGGGQYGRPLTPADERMEGDS(0.921)DEEY(0.079)DELDR
gi|472587678	RHTO_02902	261	glycosyltransferase family 31 protein	1	S	SALLSKLGGTLAPETSPVIGRKQRKPGWWAR	X;X;X;X;X;X;X;X;X;X;X;X;X;X;X;Phospho (STY);X;X;X;X;X;X;X;X;X;X;X;X;X;X;X	XXXXXXPPPPPPPPPPPPPPPXXXXXXXXXX	0.000186057	117.7	117.7	_LGGTLAPETS(ph)PVIGR_	LGGTLAPET(0.002)S(0.998)PVIGR
gi|472587648	RHTO_02872	330	hypothetical protein	4	S	ASFSTLRGTTNKSLKSPAAEPALSPLSAPSS	X;X;X;X;X;X;X;X;X;X;X;X;X;X;X;Phospho (STY);X;X;X;X;X;X;X;Phospho (STY);X;X;Phospho (STY);X;X;Phospho (STY);X	XXXXXXXXXXXXPPPPPPPPPPPPPPPPPPP	0.00894086	81.406	81.406	_SLKS(ph)PAAEPALS(ph)PLS(ph)APS(ph)SPSLR_	S(0.389)LKS(0.611)PAAEPALS(1)PLS(0.996)APS(0.808)S(0.165)PS(0.032)LR
gi|472587648	RHTO_02872	338	hypothetical protein	4	S	TTNKSLKSPAAEPALSPLSAPSSPSLRGGSS	X;X;X;X;X;X;X;Phospho (STY);X;X;X;X;X;X;X;Phospho (STY);X;X;Phospho (STY);X;X;Phospho (STY);X;X;X;X;X;X;X;X;X	XXXXPPPPPPPPPPPPPPPPPPPPPPPXXXX	0.00894086	81.406	81.406	_SLKS(ph)PAAEPALS(ph)PLS(ph)APS(ph)SPSLR_	S(0.389)LKS(0.611)PAAEPALS(1)PLS(0.996)APS(0.808)S(0.165)PS(0.032)LR
gi|472587648	RHTO_02872	341	hypothetical protein	4	S	KSLKSPAAEPALSPLSAPSSPSLRGGSSLKP	X;X;X;X;Phospho (STY);X;X;X;X;X;X;X;Phospho (STY);X;X;Phospho (STY);X;X;Phospho (STY);X;X;X;X;X;X;X;X;X;X;X;X	XPPPPPPPPPPPPPPPPPPPPPPPXXXXXXX	0.00894086	81.406	81.406	_SLKS(ph)PAAEPALS(ph)PLS(ph)APS(ph)SPSLR_	S(0.389)LKS(0.611)PAAEPALS(1)PLS(0.996)APS(0.808)S(0.165)PS(0.032)LR
gi|472587648	RHTO_02872	344	hypothetical protein	4	S	KSPAAEPALSPLSAPSSPSLRGGSSLKPLTS	X;Phospho (STY);X;X;X;X;X;X;X;Phospho (STY);X;X;Phospho (STY);X;X;Phospho (STY);X;X;X;X;X;X;X;X;X;X;X;X;X;X;X	PPPPPPPPPPPPPPPPPPPPPXXXXXXXXXX	0.00894086	81.406	81.406	_SLKS(ph)PAAEPALS(ph)PLS(ph)APS(ph)SPSLR_	S(0.389)LKS(0.611)PAAEPALS(1)PLS(0.996)APS(0.808)S(0.165)PS(0.032)LR
gi|472587607	RHTO_02830	246	regulator of nonsense transcripts 3		S	DKAKEKKGKGKSKESSRSATPVPGAAASGSG	X;X;X;X;X;X;X;X;X;X;X;X;X;X;X;Phospho (STY);X;X;X;Phospho (STY);X;X;X;X;X;X;X;X;X;X;X	XXXXXXXXXXXPPPPPPPPPPPPPPPPPPPP	0.00305913	75.718	75.718	_SKESS(ph)RSAT(ph)PVPGAAASGSGAAK_	S(0.087)KES(0.378)S(0.438)RS(0.244)AT(0.848)PVPGAAAS(0.004)GSGAAK
gi|472587572	RHTO_02795	38	conserved hypothetical protein	1	S	TSPSSPRRAATPPAASPSRLALNATANPTAP	X;X;X;X;X;X;X;X;X;X;X;X;X;X;X;Phospho (STY);X;X;X;X;X;X;X;X;X;X;X;X;X;X;X	XXXXXXXPPPPPPPPPPPPXXXXXXXXXXXX	0.00580804	73.834	73.834	_RAATPPAAS(ph)PSR_	RAAT(0.003)PPAAS(0.966)PS(0.031)R
gi|472587547	RHTO_02770	279	inner nuclear membrane protein MAN1	1;2	S	GGEETPQRDTKRRKSSLGPARLQEEKQERSR	X;X;X;X;X;X;X;X;X;X;X;X;X;X;Phospho (STY);Phospho (STY);X;X;X;X;X;X;X;X;X;X;X;X;X;X;X	XXXXXXXXXXXXPPPPPPPPPXXXXXXXXXX	0.00273532	113.22	86.288	_RKS(ph)S(ph)LGPAR_	RKS(1)S(1)LGPAR
gi|472587547	RHTO_02770	67	inner nuclear membrane protein MAN1	1	S	PQAEALLDQMRTVRASDDGVLDGESQGSSLR	X;X;X;X;X;X;X;X;X;X;X;X;X;X;X;Phospho (STY);X;X;X;X;X;X;X;X;X;X;X;X;X;X;X	XXXXXXXXXXXPPPPPPPPPPPPPPPPPPPP	1.33e-11	138.97	138.97	_TVRAS(ph)DDGVLDGESQGSSLR_	T(0.113)VRAS(0.887)DDGVLDGESQGSSLR
gi|472587482	RHTO_02704	139	protein of Calcipressin family	2	S	ATHLEVPSSGKNFLISPPGSPPVGWEQIEED	X;X;X;X;X;X;X;X;X;X;X;X;X;X;X;Phospho (STY);X;X;X;Phospho (STY);X;X;X;X;X;X;X;X;X;X;X	XXXXXXXXXXXPPPPPPPPPPPPPPPPPPPP	1.16e-05	99.092	99.092	_NFLIS(ph)PPGS(ph)PPVGWEQIEEDEPNRR_	NFLIS(1)PPGS(1)PPVGWEQIEEDEPNRR
gi|472587482	RHTO_02704	143	protein of Calcipressin family	2	S	EVPSSGKNFLISPPGSPPVGWEQIEEDEPNR	X;X;X;X;X;X;X;X;X;X;X;Phospho (STY);X;X;X;Phospho (STY);X;X;X;X;X;X;X;X;X;X;X;X;X;X;X	XXXXXXXPPPPPPPPPPPPPPPPPPPPPPPP	1.16e-05	99.092	99.092	_NFLIS(ph)PPGS(ph)PPVGWEQIEEDEPNRR_	NFLIS(1)PPGS(1)PPVGWEQIEEDEPNRR
gi|472580722	RHTO_05897	913	transcription initiation factor TFIID subunit 1	2	S	ANTPARAGTPGSRAGSVDLDDAASVASGRNA;ANTPARAGTPGSRAGSVDLDDAASVASGRNT	X;X;Phospho (STY);X;X;X;X;X;X;X;X;Phospho (STY);X;X;X;Phospho (STY);X;X;X;X;X;X;X;X;X;X;Phospho (STY);X;X;X;X	XXXXXXPPPPPPPPPPPPPPPPPPPPPPPXX	5.56e-15	133.41	133.41	_AGS(ph)VDLDDAASVAS(ph)GR_	AGS(1)VDLDDAAS(0.001)VAS(0.999)GR
gi|472580722	RHTO_05897	924	transcription initiation factor TFIID subunit 1	2	S	SRAGSVDLDDAASVASGRNAGKTKTLRIKRL;SRAGSVDLDDAASVASGRNTGKTKTLRIKRL	X;X;X;X;Phospho (STY);X;X;X;X;X;X;X;X;X;X;Phospho (STY);X;X;X;X;X;X;X;X;X;X;X;X;X;X;X	XXPPPPPPPPPPPPPPPPXXXXXXXXXXXXX	5.56e-15	133.41	133.41	_AGS(ph)VDLDDAASVAS(ph)GR_	AGS(1)VDLDDAAS(0.001)VAS(0.999)GR
gi|472580722	RHTO_05897	909	transcription initiation factor TFIID subunit 1	2	S	PGSAANTPARAGTPGSRAGSVDLDDAASVAS	X;X;Phospho (STY);X;X;X;Phospho (STY);X;X;X;X;X;X;X;X;Phospho (STY);X;X;X;Phospho (STY);X;X;X;X;X;X;X;X;X;X;Phospho (STY)	XXXXXXXXXXPPPPPPPPPPPPPPPPPPPPP	5.46e-05	93.5	93.5	_AGTPGS(ph)RAGS(ph)VDLDDAASVASGR_	AGT(0.071)PGS(0.965)RAGS(0.965)VDLDDAASVASGR
gi|472580722	RHTO_05897	896	transcription initiation factor TFIID subunit 1	2	S	AANKALAASAVDTPGSAANTPARAGTPGSRA	X;X;X;X;X;X;X;X;X;X;X;X;X;X;X;Phospho (STY);X;X;X;Phospho (STY);X;X;X;X;X;X;X;X;Phospho (STY);X;X	XXXXPPPPPPPPPPPPPPPPPPPXXXXXXXX	4.78e-09	147.87	147.87	_ALAASAVDTPGS(ph)AANT(ph)PAR_	ALAASAVDTPGS(1)AANT(1)PAR
gi|472580722	RHTO_05897	978	transcription initiation factor TFIID subunit 1	1	S	ALIDEEKLEANELLPSDDESKNERRKKRLKE	X;X;X;X;X;X;X;X;X;X;X;X;X;X;X;Phospho (STY);X;X;X;X;X;X;X;X;X;X;X;X;X;X;X	PPPPPPPPPPPPPPPPPPPPPPPPXXXXXXX	1.7e-20	149.44	122.22	_ALIDEEKLEANELLPS(ph)DDESKNER_	ALIDEEKLEANELLPS(1)DDESKNER
gi|472585998	RHTO_07274	44	nuclear pore complex, nucleoporin 88 family protein	1	S	RPSDRLAKSTISHSASSKSLFGLSTPAQPDS;RPTDRLAKSTISHSASSKSLFGISTATSTSR	X;X;Phospho (STY);X;X;X;X;X;X;X;X;X;X;X;X;Phospho (STY);X;X;X;X;X;X;X;X;X;X;X;X;X;X;Phospho (STY)	XXXXXXXXPPPPPPPPPPXXXXXXXXXXXXX	0.000423041	136.93	136.93	_STISHSAS(ph)SK_	STISHS(0.046)AS(0.921)S(0.032)K
gi|472586007	RHTO_07283	13	tyrosyl-DNA phosphodiesterase 1	2	S	APSMPPKRPVETLVLSSDEEDTAPVASTSRS	X;X;X;X;X;X;X;X;X;X;X;X;X;X;X;Phospho (STY);Phospho (STY);X;X;X;X;X;X;X;X;X;X;X;X;X;X	XXXXXXXPPPPPPPPPPPPPPPPPPPPPPPX	2.01e-14	139.44	139.44	_RPVETLVLS(ph)S(ph)DEEDTAPVASTSR_	RPVET(0.016)LVLS(0.992)S(0.992)DEEDT(0.001)APVASTSR
gi|472586007	RHTO_07283	14	tyrosyl-DNA phosphodiesterase 1	2	S	PSMPPKRPVETLVLSSDEEDTAPVASTSRSR	X;X;X;X;X;X;X;X;X;X;X;X;X;X;Phospho (STY);Phospho (STY);X;X;X;X;X;X;X;X;X;X;X;X;X;X;X	XXXXXXPPPPPPPPPPPPPPPPPPPPPPPXX	2.01e-14	139.44	77.062	_RPVETLVLS(ph)S(ph)DEEDTAPVASTSR_	RPVETLVLS(0.99)S(0.997)DEEDT(0.011)APVASTSR
gi|472586007	RHTO_07283	306	tyrosyl-DNA phosphodiesterase 1	1	S	DNAFYVHDFPRRRSASPVNEESNPFKNPTHT	X;X;X;X;X;X;X;X;X;X;X;X;X;X;X;Phospho (STY);X;X;X;X;X;X;X;X;X;X;X;X;X;X;X	XXXXXXXXXXXXXPPPPPPPPPPPPPXXXXX	0.00428189	124.46	124.46	_SAS(ph)PVNEESNPFK_	S(0.017)AS(0.983)PVNEESNPFK
gi|472586012	RHTO_07288	7	cytoplasmic dynein heavy chain 1	1;2	S	_________MQDRRPSSPAVDGAESPPTATP	X;X;X;X;X;X;X;X;X;X;X;X;X;X;X;Phospho (STY);X;X;X;X;X;X;X;X;Phospho (STY);X;X;X;X;Phospho (STY);X	XXXXXXXXXXXXXPPPPPPPPPPPPPPPPPP	8.75e-54	207.43	115.34	_RPS(ph)SPAVDGAESPPTAT(ph)PGPR_	RPS(0.879)S(0.121)PAVDGAES(0.326)PPT(0.145)AT(0.529)PGPR
gi|472586012	RHTO_07288	8	cytoplasmic dynein heavy chain 1	1;2	S	________MQDRRPSSPAVDGAESPPTATPG	X;X;X;X;X;X;X;X;X;X;X;X;X;X;X;Phospho (STY);X;X;X;X;X;X;X;Phospho (STY);X;X;X;X;X;X;X	XXXXXXXXXXXXPPPPPPPPPPPPPPPPPPP	8.75e-54	207.43	141.19	_RPSS(ph)PAVDGAESPPTATPGPR_	RPS(0.046)S(0.954)PAVDGAESPPTATPGPR
gi|472586012	RHTO_07288	16	cytoplasmic dynein heavy chain 1	2	S	MQDRRPSSPAVDGAESPPTATPGPRNQFDLA	X;X;X;X;X;X;Phospho (STY);Phospho (STY);X;X;X;X;X;X;X;Phospho (STY);X;X;X;X;X;X;X;X;X;X;X;X;X;X;X	XXXXPPPPPPPPPPPPPPPPPPPPPXXXXXX	0.000618338	99.219	99.219	_RPSS(ph)PAVDGAES(ph)PPTATPGPR_	RPS(0.458)S(0.542)PAVDGAES(0.989)PPT(0.01)AT(0.001)PGPR
gi|472586080	RHTO_07356	633	nuclear pore complex protein Nup62	1	S	RGGALGASQLGRSTASPFARRL_________	X;X;X;X;X;X;X;X;X;X;X;X;X;X;X;Phospho (STY);X;X;X;X;X;X;X;X;X;X;X;X;X;X;X	XXXXXXXXXXXXPPPPPPPPXXXXXXXXXXX	0.00119596	157.38	157.38	_STAS(ph)PFAR_	STAS(1)PFAR
gi|472588339	RHTO_00239	182	dCMP deaminase	1;2	S	SNDPPSPTPSPFKQISPEPSPELSRTRLFQP	X;X;X;X;X;Phospho (STY);X;Phospho (STY);X;Phospho (STY);X;X;X;X;X;Phospho (STY);X;X;X;Phospho (STY);X;X;X;X;X;X;X;X;X;X;X	XXXXXXXXXXXXXPPPPPPPPPPPPXXXXXX	0.000134925	153.94	133.16	_QIS(ph)PEPS(ph)PELSR_	QIS(1)PEPS(0.993)PELS(0.007)R
gi|472588339	RHTO_00239	186	dCMP deaminase	2	S	PSPTPSPFKQISPEPSPELSRTRLFQPAEQD;PSPTPSPFKQISPEPSPELSRTRLFQPTEQD	X;Phospho (STY);X;Phospho (STY);X;Phospho (STY);X;X;X;X;X;Phospho (STY);X;X;X;Phospho (STY);X;X;X;X;X;X;X;X;X;X;X;X;X;X;X	XXXXXXXXXPPPPPPPPPPPPXXXXXXXXXX	0.0140014	151.04	151.04	_QIS(ph)PEPS(ph)PELSR_	QIS(1)PEPS(1)PELSR
gi|472588355	RHTO_00255	245	pre-mrna-splicing ATP-dependent RNA helicase DDX23/PRP28	1	S	TAGGKDLVAEPMKVDSSTPPRHATEMPPPPP	X;X;X;X;X;X;X;X;X;X;X;Oxidation (M);X;X;X;Phospho (STY);X;X;X;X;X;X;X;X;X;X;X;X;X;X;X	XXXXXPPPPPPPPPPPPPPPPXXXXXXXXXX	0.0127638	88.101	88.101	_DLVAEPM(ox)KVDS(ph)STPPR_	DLVAEPMKVDS(0.799)S(0.1)T(0.1)PPR
gi|472588355	RHTO_00255	246	pre-mrna-splicing ATP-dependent RNA helicase DDX23/PRP28	1	S	AGGKDLVAEPMKVDSSTPPRHATEMPPPPPP	X;X;X;X;X;X;X;X;X;X;Oxidation (M);X;X;X;X;Phospho (STY);X;X;X;X;X;X;X;X;X;X;X;X;X;X;X	XXXXPPPPPPPPPPPPPPPPXXXXXXXXXXX	0.0133986	84.753	73.809	_DLVAEPM(ox)KVDSS(ph)TPPR_	DLVAEPMKVDS(0.145)S(0.711)T(0.145)PPR
gi|472588357	RHTO_00257	1354	calcium/calmodulin-dependent protein kinase kinase	1	S	SPRDGSIRGVSLDPPSPRKAHQPALGQWDDE	X;X;X;X;X;X;X;X;X;X;X;X;X;X;X;Phospho (STY);X;X;X;X;X;X;X;X;X;X;X;X;X;X;X	XXXXXXXXPPPPPPPPPPXXXXXXXXXXXXX	4.75e-19	129.54	129.54	_GVSLDPPS(ph)PR_	GVSLDPPS(1)PR
gi|472588357	RHTO_00257	59	calcium/calmodulin-dependent protein kinase kinase	1	S	HKRIPSSLSRSSRIDSLAAVANRGAPAGGTA;HKRIPSSLSRSSRIDSLAAVANRGPGAAGTG	X;X;X;X;X;X;X;X;X;X;X;X;X;X;X;Phospho (STY);X;X;X;X;X;X;X;X;X;X;X;X;X;X;X	XXXXXXXXXXXXXPPPPPPPPPPXXXXXXXX	0.00579109	119.39	119.39	_IDS(ph)LAAVANR_	IDS(1)LAAVANR
gi|472588398	RHTO_00298	590	component of oligomeric golgi complex 2	2	S	ASSANLAAAAPGSPASRASFDGDRSRLAASA	X;X;X;X;X;X;X;X;X;X;X;X;X;X;X;Phospho (STY);X;X;Phospho (STY);X;X;X;X;X;X;X;X;X;X;X;X	PPPPPPPPPPPPPPPPPPPPPPPPXXXXXXX	0.000117406	80.061	80.061	_YVLPTSASSANLAAAAPGSPAS(ph)RAS(ph)FDGDR_	YVLPTSASSANLAAAAPGS(0.301)PAS(0.85)RAS(0.85)FDGDR
gi|472588398	RHTO_00298	593	component of oligomeric golgi complex 2	2	S	ANLAAAAPGSPASRASFDGDRSRLAASAGNS	X;X;X;X;X;X;X;X;X;X;X;X;Phospho (STY);X;X;Phospho (STY);X;X;X;X;X;X;X;X;X;X;X;X;X;X;X	PPPPPPPPPPPPPPPPPPPPPXXXXXXXXXX	0.000117406	80.061	80.061	_YVLPTSASSANLAAAAPGSPAS(ph)RAS(ph)FDGDR_	YVLPTSASSANLAAAAPGS(0.301)PAS(0.85)RAS(0.85)FDGDR
gi|472588447	RHTO_00347	356	mitogen-activated protein kinase Maf1	2	S	LRRPVDRAMSTHLKRSHSASSVASISLNKKK	X;X;X;X;X;X;X;X;X;X;X;X;X;X;X;Phospho (STY);X;X;X;Phospho (STY);Phospho (STY);X;X;X;X;X;X;X;X;X;X	XXXXXXXXXXXXXXXPPPPPPPPPPPPPPXX	0.00254182	116.01	77.221	_S(ph)HSAS(ph)SVASISLNK_	S(0.83)HS(0.242)AS(0.472)S(0.455)VAS(0.002)ISLNK
gi|472588447	RHTO_00347	358	mitogen-activated protein kinase Maf1	2;3	S	RPVDRAMSTHLKRSHSASSVASISLNKKKIK	X;X;X;X;X;X;X;X;X;X;X;X;X;X;X;Phospho (STY);X;Phospho (STY);Phospho (STY);X;X;Phospho (STY);X;X;X;X;X;X;X;X;X	XXXXXXXXXXXXXPPPPPPPPPPPPPPPXXX	1.83e-06	122.01	122.01	_SHS(ph)ASS(ph)VASISLNK_	SHS(1)AS(0.007)S(0.988)VAS(0.005)ISLNK
gi|472588447	RHTO_00347	360	mitogen-activated protein kinase Maf1	2;3	S	VDRAMSTHLKRSHSASSVASISLNKKKIKA_	X;X;X;X;X;X;X;X;X;X;X;Phospho (STY);X;Phospho (STY);X;Phospho (STY);X;X;X;Phospho (STY);X;X;X;X;X;X;X;X;X;X;X	XXXXXXXXXXXPPPPPPPPPPPPPPPXXXXX	1.83e-06	110.56	110.56	_SHS(ph)AS(ph)SVASISLNK_	S(0.004)HS(0.996)AS(0.728)S(0.272)VASISLNK
gi|472588447	RHTO_00347	361	mitogen-activated protein kinase Maf1	2;3	S	DRAMSTHLKRSHSASSVASISLNKKKIKA__	X;X;X;X;X;X;X;X;X;X;Phospho (STY);X;Phospho (STY);X;X;Phospho (STY);X;X;Phospho (STY);X;X;X;X;X;X;X;X;X;X;X;X	XXXXXXXXXXPPPPPPPPPPPPPPPXXXXXX	1.83e-06	122.01	122.01	_SHS(ph)ASS(ph)VASISLNK_	SHS(1)AS(0.007)S(0.988)VAS(0.005)ISLNK
gi|472588447	RHTO_00347	364	mitogen-activated protein kinase Maf1	3	S	MSTHLKRSHSASSVASISLNKKKIKA_____	X;X;X;X;X;X;X;X;X;Phospho (STY);X;Phospho (STY);Phospho (STY);X;X;Phospho (STY);X;X;X;X;X;X;X;X;X;X;X;X;X;X;X	XXXXXXXPPPPPPPPPPPPPPPXXXXXXXXX	0.0113584	64.275	64.275	_SHS(ph)AS(ph)SVAS(ph)ISLNKK_	S(0.366)HS(0.631)AS(0.502)S(0.502)VAS(0.975)IS(0.024)LNKK
gi|472588451	RHTO_00351	931	phosphoinositide-3-kinase, regulatory subunit 4, p150		S	SRLQGETLSRRFSSTSATSSPRASASLDLNR	X;X;X;X;X;X;X;X;X;X;X;X;X;X;X;Phospho (STY);X;Phospho (STY);X;X;X;X;X;X;X;X;X;X;X;X;X	XXXXXXXXXXPPPPPPPPPPPPXXXXXXXXX	0.00632207	82.59	82.59	_RFSSTS(ph)AT(ph)SSPR_	RFS(0.513)S(0.14)T(0.118)S(0.409)AT(0.409)S(0.408)S(0.002)PR
gi|472588451	RHTO_00351	934	phosphoinositide-3-kinase, regulatory subunit 4, p150		S	QGETLSRRFSSTSATSSPRASASLDLNRPVG	X;X;X;X;X;X;X;X;X;X;X;X;X;X;X;X;X;X;X;X;X;X;X;X;X;X;X;X;X;X;X	XXXXXXXXXXXXXXXXXXXXXXXXXXXXXXX	0.00632207	88.101	82.59	_RFSSTS(ph)AT(ph)SSPR_	RFS(0.513)S(0.14)T(0.118)S(0.409)AT(0.409)S(0.408)S(0.002)PR
gi|472588464	RHTO_00364	407	GATA-binding factor 6-B	1;2	S	PFEGMTFAHLRSRANSLEAVDRDAAVKYHNP	X;X;X;X;X;X;X;X;X;X;X;Phospho (STY);X;X;X;Phospho (STY);X;X;X;X;X;X;X;X;X;X;X;X;X;X;X	XXXXXXXXXXXPPPPPPPPPPPPPPPPXXXX	0.00150934	119.08	72.585	_S(ph)RANS(ph)LEAVDRDAAVK_	S(1)RANS(1)LEAVDRDAAVK
gi|472588483	RHTO_00383	105	nucleosome remodeling complex ATPase subunit (Snf2h)	1;2	S	VKRAHVPDDVEVLHFSSPPADSKKRKGKGKA	X;X;X;X;X;X;X;X;X;X;X;X;X;X;X;Phospho (STY);Phospho (STY);X;X;X;X;X;X;X;X;X;X;X;X;X;X	XXXPPPPPPPPPPPPPPPPPPPPXXXXXXXX	5.86e-08	130.36	93.495	_AHVPDDVEVLHFS(ph)S(ph)PPADSK_	AHVPDDVEVLHFS(0.998)S(0.998)PPADS(0.004)K
gi|472588483	RHTO_00383	106	nucleosome remodeling complex ATPase subunit (Snf2h)	1;2	S	KRAHVPDDVEVLHFSSPPADSKKRKGKGKAK	X;X;X;X;X;X;X;X;X;X;X;X;X;X;Phospho (STY);Phospho (STY);X;X;X;X;X;X;X;X;X;X;X;X;X;X;X	XXPPPPPPPPPPPPPPPPPPPPXXXXXXXXX	5.86e-08	130.36	93.495	_AHVPDDVEVLHFS(ph)S(ph)PPADSK_	AHVPDDVEVLHFS(0.998)S(0.998)PPADS(0.004)K
gi|472588490	RHTO_00390	734	golgi apyrase	1	S	QQQDPNAGAPFQRSTSGSALASYGPRTSSPP	X;X;X;X;X;X;X;X;X;X;X;X;X;X;X;Phospho (STY);X;X;X;X;X;X;X;X;X;X;X;X;X;X;X	XXXXXXXXXXXXXPPPPPPPPPPPPPXXXXX	3.61e-85	218.21	108.14	_STS(ph)GSALASYGPR_	ST(0.002)S(0.996)GS(0.002)ALASYGPR
gi|472588495	RHTO_00395	273	transcription regulator HTH, APSES-type	1;2	S	DSPAARSPRAKRARVSSPLAGKSGSSGAQAL	X;X;X;X;X;X;X;X;X;X;X;X;X;X;X;Phospho (STY);Phospho (STY);X;X;X;X;X;X;X;X;X;X;X;X;X;X	XXXXXXXXXXXXPPPPPPPPPPXXXXXXXXX	0.000175085	157.2	118.08	_ARVS(ph)S(ph)PLAGK_	ARVS(1)S(1)PLAGK
gi|472588495	RHTO_00395	274	transcription regulator HTH, APSES-type	1;2	S	SPAARSPRAKRARVSSPLAGKSGSSGAQALS	X;X;X;X;X;X;X;X;X;X;X;X;X;X;Phospho (STY);Phospho (STY);X;X;X;X;X;X;X;X;X;X;X;X;X;X;X	XXXXXXXXXXXPPPPPPPPPPXXXXXXXXXX	3.89e-10	170.47	118.08	_ARVS(ph)S(ph)PLAGK_	ARVS(1)S(1)PLAGK
gi|472588495	RHTO_00395	8	transcription regulator HTH, APSES-type	2	S	________MPSTRRASKSPAPPVRRSSRQST	X;X;X;X;X;X;X;X;X;X;X;X;X;X;X;Phospho (STY);X;Phospho (STY);X;X;X;X;X;X;X;Phospho (STY);X;X;X;Phospho (STY);Phospho (STY)	XXXXXXXXXXXXXPPPPPPPPPPPXXXXXXX	0.00312181	108.14	108.14	_RAS(ph)KS(ph)PAPPVR_	RAS(1)KS(1)PAPPVR
gi|472588495	RHTO_00395	10	transcription regulator HTH, APSES-type	1;2	S	______MPSTRRASKSPAPPVRRSSRQSTPT	X;X;X;X;X;X;X;X;X;X;X;X;X;Phospho (STY);X;Phospho (STY);X;X;X;X;X;X;X;Phospho (STY);X;X;X;Phospho (STY);Phospho (STY);X;Phospho (STY)	XXXXXXXXXXXPPPPPPPPPPPXXXXXXXXX	0.00312181	108.14	108.14	_RAS(ph)KS(ph)PAPPVR_	RAS(1)KS(1)PAPPVR
gi|472588495	RHTO_00395	30	transcription regulator HTH, APSES-type	1;2;4	S	VRRSSRQSTPTRDIASPPPSTRTTRSSAVGL	X;X;X;X;X;X;X;Phospho (STY);Phospho (STY);X;Phospho (STY);X;X;X;X;Phospho (STY);X;X;X;X;X;X;X;X;X;X;X;X;X;X;X	XXXPPPPPPPPPPPPPPPPPPPXXXXXXXXX	0.00105594	132.59	120.84	_DIAS(ph)PPPSTR_	DIAS(1)PPPSTR
gi|472588514	RHTO_00414	244	DJ-1 family protein	1	S	RRGVTLEDKPLSRNASQGLKRTASQWKKAAQ;RRGVTLEDRPLSRNASQGLKRTASQWKKAAQ	X;X;X;X;X;X;X;X;X;X;X;Phospho (STY);X;X;X;Phospho (STY);X;X;X;X;X;X;X;X;X;X;X;X;X;X;X	XXXXXXXXXXXXXPPPPPPPPXXXXXXXXXX	0.00696781	104.82	104.82	_NAS(ph)QGLKR_	NAS(1)QGLKR
gi|472588528	RHTO_00428	486	eukaryotic translation initiation factor 3 62 kda subunit	1	S	AGSATEPENGDSRATSVSASEKEPETKRAKV	X;X;X;X;X;X;X;X;X;X;X;X;X;X;X;Phospho (STY);X;X;X;X;X;X;X;X;X;X;X;X;X;X;X	XXXXXXXXXXXXXPPPPPPPPPPPPPPPXXX	1.25e-76	214.81	108.34	_ATS(ph)VSASEKEPETKR_	AT(0.011)S(0.988)VSASEKEPETKR
gi|472588586	RHTO_00486	14	spindle pole body-associated protein sad1	2	S	__MSRPPNSRSSHGRSPSVEGEIRRASVHSL	X;X;X;X;X;X;X;X;X;X;X;X;X;X;X;Phospho (STY);X;Phospho (STY);X;X;X;X;X;X;X;X;X;X;X;X;X	XXXXXXXXXXPPPPPPPPPPPPPPXXXXXXX	0.00523955	106.38	106.38	_SSHGRS(ph)PS(ph)VEGEIR_	SSHGRS(1)PS(1)VEGEIR
gi|472588586	RHTO_00486	16	spindle pole body-associated protein sad1	2	S	MSRPPNSRSSHGRSPSVEGEIRRASVHSLNL	X;X;X;X;X;X;X;X;X;X;X;X;X;Phospho (STY);X;Phospho (STY);X;X;X;X;X;X;X;X;X;X;X;X;X;X;X	XXXXXXXXPPPPPPPPPPPPPPXXXXXXXXX	0.00523955	106.38	106.38	_SSHGRS(ph)PS(ph)VEGEIR_	SSHGRS(1)PS(1)VEGEIR
gi|472588586	RHTO_00486	229	spindle pole body-associated protein sad1	1	S	EFDQRAKGKKRTKVHSEEDDLADDPRSANKP	X;X;X;X;X;X;X;X;X;X;X;X;X;X;X;Phospho (STY);X;X;X;X;X;X;X;X;X;X;X;X;X;X;X	XXXXXXXXXXXXXPPPPPPPPPPPPPXXXXX	0.00976665	74.12	74.12	_VHS(ph)EEDDLADDPR_	VHS(1)EEDDLADDPR
gi|472588610	RHTO_00510	614	conserved hypothetical protein	1	S	FAAPALKRNGSRFFDSPSVSRGVSPELQAPA	X;X;X;X;X;X;X;X;X;X;X;X;X;X;X;Phospho (STY);X;X;X;X;X;X;X;X;X;X;X;X;X;X;X	XXXXXXXXXXXXPPPPPPPPPXXXXXXXXXX	0.0123413	97.214	97.214	_FFDS(ph)PSVSR_	FFDS(0.92)PS(0.075)VS(0.005)R
gi|472588644	RHTO_00544	782	exocyst complex component, exo84 subunit	1	S	EVLKAEGEDGRGRPASGAGFARDDAVGQAQ_;EVLKAEGEEGRGRPASGAGFARDDAVGQAQ_	X;X;X;X;X;X;X;X;X;X;X;X;X;X;X;Phospho (STY);X;X;X;X;X;X;X;X;X;X;X;X;X;X;X	XXXXXXXXXXXPPPPPPPPPPPXXXXXXXXX	0.00510364	96.464	85.837	_GRPAS(ph)GAGFAR_	GRPAS(1)GAGFAR
gi|472585856	RHTO_07132	348	hypothetical protein	2	S	SRTPLSPSPPASRGRSPSPFSGPPSRRRSPS;SRTPLSPSPPRSRGRSPSPFSGPPSRRRSPS	X;X;X;X;X;Phospho (STY);X;Phospho (STY);X;X;X;X;X;X;X;Phospho (STY);X;Phospho (STY);X;X;Phospho (STY);X;X;X;X;X;X;X;X;X;X	XXXXXXXXXXXXXPPPPPPPPPPPPPXXXXX	3.72e-14	149.86	123.63	_GRS(ph)PS(ph)PFSGPPSR_	GRS(1)PS(1)PFSGPPSR
gi|472585856	RHTO_07132	350	hypothetical protein	2	S	TPLSPSPPASRGRSPSPFSGPPSRRRSPSPR;TPLSPSPPRSRGRSPSPFSGPPSRRRSPSPR	X;X;X;Phospho (STY);X;Phospho (STY);X;X;X;X;X;X;X;Phospho (STY);X;Phospho (STY);X;X;X;X;X;X;X;X;X;X;X;X;X;X;X	XXXXXXXXXXXPPPPPPPPPPPPPXXXXXXX	3.72e-14	138.89	123.63	_GRS(ph)PS(ph)PFSGPPSR_	GRS(1)PS(1)PFSGPPSR
gi|472585856	RHTO_07132	353	hypothetical protein	2	S	SPSPPASRGRSPSPFSGPPSRRRSPSPRGGS;SPSPPRSRGRSPSPFSGPPSRRRSPSPRGGS	Phospho (STY);X;Phospho (STY);X;X;X;X;X;X;X;Phospho (STY);X;X;X;X;Phospho (STY);X;X;X;X;X;X;X;X;X;X;X;X;X;X;X	XXXXXXXXPPPPPPPPPPPPPXXXXXXXXXX	3.72e-14	149.86	149.86	_GRS(ph)PSPFS(ph)GPPSR_	GRS(0.992)PS(0.081)PFS(0.926)GPPSR
gi|472585856	RHTO_07132	223	hypothetical protein	1	S	SAALSPPPRRYGGPPSPVYRRHSPGPPRGYG;SRSRSPPTRRYGGPPSPVYRRHSPGPPRSYG	X;X;X;X;X;X;X;X;X;X;X;X;X;X;X;Phospho (STY);X;X;X;X;X;X;X;X;X;X;X;X;X;X;X	XXXXXXXXXXPPPPPPPPPPXXXXXXXXXXX	0.00192308	124.12	101.71	_YGGPPS(ph)PVYR_	YGGPPS(1)PVYR
gi|472585862	RHTO_07138	1648	sterol 3-beta-glucosyltransferase, glycosyltransferase family 1 protein	1	S	RTTSSDEGWDVMSRGSATGSTWDDSISRASS	X;X;X;X;X;X;X;X;X;X;X;X;X;X;X;Phospho (STY);X;X;X;X;X;X;X;X;X;X;X;X;X;X;X	XXXXXXXXXXXXXXPPPPPPPPPPPPPPXXX	0.00492079	128.99	128.99	_GS(ph)ATGSTWDDSISR_	GS(0.996)AT(0.004)GSTWDDSISR
gi|472585909	RHTO_07185	500	CBS and PB1 domain containing protein	1;2;3	S	PFQTPTRPGYHRSKDSIDTPGSELYPNDSAS	X;X;X;X;X;X;X;X;X;X;X;X;Phospho (STY);X;X;Phospho (STY);X;X;Phospho (STY);X;X;Phospho (STY);X;X;X;X;X;X;Phospho (STY);X;X	XXXXXXXXXXXXPPPPPPPPPPPPPPPPPPP	4.98e-22	119.94	56.933	_SKDS(ph)IDT(ph)PGS(ph)ELYPNDSASVIHDDGASDLAPAPR_	S(0.18)KDS(0.824)IDT(0.973)PGS(0.731)ELY(0.223)PNDS(0.012)AS(0.012)VIHDDGAS(0.043)DLAPAPR
gi|472585909	RHTO_07185	506	CBS and PB1 domain containing protein	1;2;3	S	RPGYHRSKDSIDTPGSELYPNDSASVIHDDG	X;X;X;X;X;X;X;X;X;Phospho (STY);X;X;Phospho (STY);X;X;Phospho (STY);X;X;X;X;X;X;Phospho (STY);X;Phospho (STY);X;X;X;X;X;X	XXXXXXPPPPPPPPPPPPPPPPPPPPPPPPP	2.09e-18	108.5	77.065	_SKDSIDTPGS(ph)ELYPNDSASVIHDDGASDLAPAPR_	S(0.002)KDS(0.001)IDT(0.029)PGS(0.94)ELY(0.026)PNDS(0.001)AS(0.001)VIHDDGASDLAPAPR
gi|472585909	RHTO_07185	513	CBS and PB1 domain containing protein	1;2;3	S	KDSIDTPGSELYPNDSASVIHDDGASDLAPA	X;X;Phospho (STY);X;X;Phospho (STY);X;X;Phospho (STY);X;X;Phospho (STY);X;X;X;Phospho (STY);X;Phospho (STY);X;X;X;X;X;X;X;Phospho (STY);X;X;X;X;X	PPPPPPPPPPPPPPPPPPPPPPPPPPPPPPP	1.71e-21	113.15	70.632	_SKDSIDTPGSELYPNDS(ph)ASVIHDDGASDLAPAPR_	SKDSIDTPGSELY(0.011)PNDS(0.714)AS(0.146)VIHDDGAS(0.129)DLAPAPR
gi|472585909	RHTO_07185	515	CBS and PB1 domain containing protein	1;2;3	S	SIDTPGSELYPNDSASVIHDDGASDLAPAPR	X;X;X;Phospho (STY);X;X;Phospho (STY);X;X;X;X;X;X;Phospho (STY);X;Phospho (STY);X;X;X;X;X;X;X;Phospho (STY);X;X;X;X;X;X;X	PPPPPPPPPPPPPPPPPPPPPPPPPPPPPPP	1.71e-21	113.15	63.095	_SKDSIDTPGSELYPNDSAS(ph)VIHDDGAS(ph)DLAPAPR_	SKDSIDTPGSELY(0.009)PNDS(0.353)AS(0.84)VIHDDGAS(0.799)DLAPAPR
gi|472585909	RHTO_07185	523	CBS and PB1 domain containing protein	1;2;3	S	LYPNDSASVIHDDGASDLAPAPRRPGQASSV	X;Phospho (STY);X;X;X;Phospho (STY);X;Phospho (STY);X;X;X;X;X;X;X;Phospho (STY);X;X;X;X;X;X;X;X;X;X;X;X;Phospho (STY);Phospho (STY);X	PPPPPPPPPPPPPPPPPPPPPPPXXXXXXXX	1.65e-26	134.11	110.46	_SKDSIDTPGSELYPNDSASVIHDDGAS(ph)DLAPAPR_	SKDSIDTPGSELYPNDSASVIHDDGAS(1)DLAPAPR
gi|472585909	RHTO_07185	596	CBS and PB1 domain containing protein	1	S	IVSGKLSSDPFFAEQSEDEALPKADPKDFSI	X;X;X;X;X;X;X;X;X;X;X;X;X;X;X;Phospho (STY);X;X;X;X;X;X;X;X;X;X;X;X;X;X;X	XXXXXPPPPPPPPPPPPPPPPPPXXXXXXXX	3.51e-45	203.79	167.88	_LSSDPFFAEQS(ph)EDEALPK_	LSSDPFFAEQS(1)EDEALPK
gi|472585909	RHTO_07185	497	CBS and PB1 domain containing protein	3	S	QAPPFQTPTRPGYHRSKDSIDTPGSELYPND	X;X;X;X;X;X;X;X;X;X;X;X;X;X;X;Phospho (STY);X;X;Phospho (STY);X;X;X;X;X;X;X;X;X;X;X;X	XXXXXXXXXXXXXXXPPPPPPPPPPPPPPPP	0.00558924	56.46	56.46	_S(ph)KDS(ph)IDTPGSELYPNDS(ph)ASVIHDDGASDLAPAPR_	S(0.653)KDS(0.641)IDT(0.448)PGS(0.258)ELY(0.003)PNDS(0.552)AS(0.223)VIHDDGAS(0.222)DLAPAPR
gi|472585929	RHTO_07205	1101	vacuole-associated enzyme activator complex component Vac14	1	S	GGPISAAASAVQRALSPTMQGTKSRIGSASN	X;X;X;X;X;X;X;X;X;X;X;X;X;X;X;Phospho (STY);X;X;Oxidation (M);X;X;X;X;X;X;X;X;X;X;X;X	XXXXXXXXXXXXXPPPPPPPPPPXXXXXXXX	0.00249496	116.03	87.719	_ALS(ph)PTM(ox)QGTK_	ALS(1)PTMQGTK
gi|472580365	RHTO_06620	239	[3-methyl-2-oxobutanoate dehydrogenase (acetyl-transferring)] kinase	1;2	S	DAARDPRIEPSARPPSSSLSASRVSVLDLAL	X;X;X;X;X;X;X;X;X;X;X;X;X;X;X;Phospho (STY);X;X;X;X;X;X;X;X;X;X;X;X;X;X;X	XXXXXXXPPPPPPPPPPPPPPPPXXXXXXXX	4.18e-05	121.44	70.942	_IEPSARPPS(ph)SSLSASR_	IEPS(0.002)ARPPS(0.529)S(0.401)S(0.049)LS(0.008)AS(0.011)R
gi|472580365	RHTO_06620	240	[3-methyl-2-oxobutanoate dehydrogenase (acetyl-transferring)] kinase	1;2	S	AARDPRIEPSARPPSSSLSASRVSVLDLALN	X;X;X;X;X;X;X;X;X;X;X;X;X;X;X;Phospho (STY);Phospho (STY);X;X;X;X;X;X;X;X;X;X;X;X;X;X	XXXXXXPPPPPPPPPPPPPPPPXXXXXXXXX	4.18e-05	121.44	83.633	_IEPSARPPSS(ph)SLSASR_	IEPS(0.038)ARPPS(0.119)S(0.806)S(0.029)LS(0.007)ASR
gi|472580365	RHTO_06620	241	[3-methyl-2-oxobutanoate dehydrogenase (acetyl-transferring)] kinase	2	S	ARDPRIEPSARPPSSSLSASRVSVLDLALNP	X;X;X;X;X;X;X;X;X;X;X;X;X;X;Phospho (STY);Phospho (STY);X;X;X;X;X;X;X;X;X;X;X;X;X;X;X	XXXXXPPPPPPPPPPPPPPPPXXXXXXXXXX	0.000191726	114.9	59.585	_IEPSARPPSS(ph)S(ph)LSASR_	IEPS(0.01)ARPPS(0.452)S(0.657)S(0.815)LS(0.046)AS(0.02)R
gi|472580879	RHTO_05749	349	glycosyltransferase family 8 protein	1;2	S	PTATTPLAIPSARAASPPHLTWDPARSSPPR	X;X;X;X;X;X;X;X;X;X;X;X;X;X;X;Phospho (STY);X;X;X;X;X;X;X;X;X;X;Phospho (STY);Phospho (STY);X;X;X	XXXXXXXXXXXXXPPPPPPPPPPPPPPPPPP	0.00266396	91.812	91.812	_AAS(ph)PPHLTWDPAR_	AAS(1)PPHLTWDPAR
gi|472580879	RHTO_05749	656	glycosyltransferase family 8 protein	1	S	RIQIKFRRAVDKGELSPTNRRSKKSNSPSST	X;X;X;X;X;X;X;X;X;X;X;X;X;X;X;Phospho (STY);X;X;X;X;X;X;X;X;X;X;X;X;X;X;X	XXXXXXXXPPPPPPPPPPPPPXXXXXXXXXX	0.00331418	120.06	70.438	_AVDKGELS(ph)PTNR_	AVDKGELS(0.97)PT(0.03)NR
gi|472580879	RHTO_05749	750	glycosyltransferase family 8 protein	1	S	AQTSPRQQLRLQMPVSPASGALSPRLAAQAL	X;X;Phospho (STY);Phospho (STY);X;X;X;X;X;X;X;X;Oxidation (M);X;X;Phospho (STY);X;X;X;X;X;X;X;X;X;X;X;X;X;X;X	XXXXXXXXXXPPPPPPPPPPPPPPPXXXXXX	2.49e-06	127.32	95.666	_LQM(ox)PVS(ph)PASGALSPR_	LQMPVS(0.541)PAS(0.403)GALS(0.056)PR
gi|472580879	RHTO_05749	753	glycosyltransferase family 8 protein	1	S	SPRQQLRLQMPVSPASGALSPRLAAQALRNS	Phospho (STY);X;X;X;X;X;X;X;X;Oxidation (M);X;X;X;X;X;Phospho (STY);X;X;X;X;X;X;X;X;X;X;X;X;X;X;X	XXXXXXXPPPPPPPPPPPPPPPXXXXXXXXX	2.49e-06	127.32	102.57	_LQM(ox)PVSPAS(ph)GALSPR_	LQMPVS(0.057)PAS(0.942)GALS(0.001)PR
gi|472580879	RHTO_05749	757	glycosyltransferase family 8 protein	1	S	QLRLQMPVSPASGALSPRLAAQALRNSTAAR	X;X;X;X;X;Oxidation (M);X;X;X;X;X;X;X;X;X;Phospho (STY);X;X;X;X;X;X;X;X;X;X;X;X;X;X;X	XXXPPPPPPPPPPPPPPPXXXXXXXXXXXXX	5.11e-07	150.45	148.48	_LQM(ox)PVSPASGALS(ph)PR_	LQMPVSPASGALS(1)PR
gi|472580879	RHTO_05749	776	glycosyltransferase family 8 protein	1	S	AAQALRNSTAARLTASGSGTGDAPPLLRATR	X;X;X;X;X;X;X;X;X;X;X;X;X;X;X;Phospho (STY);X;X;X;X;X;X;X;X;X;X;X;X;X;X;X	XXXXXXXXXXXXPPPPPPPPPPPPPPPPXXX	0.000873345	112.82	112.82	_LTAS(ph)GSGTGDAPPLLR_	LT(0.001)AS(0.828)GS(0.164)GT(0.008)GDAPPLLR
gi|472580879	RHTO_05749	720	glycosyltransferase family 8 protein	2	S	RKDSRYVPTSPRQPRSPHYVVASPAAFANAA	X;X;X;X;X;X;X;X;Phospho (STY);Phospho (STY);X;X;X;X;X;Phospho (STY);X;X;X;X;X;X;X;X;X;X;X;X;X;X;X	XXXXXXXXXXXXPPPPPPPPPPPPPPPPPPP	4.66e-21	150.69	128.91	_S(ph)PHYVVASPAAFANAAQTS(ph)PR_	S(1)PHYVVASPAAFANAAQT(0.015)S(0.985)PR
gi|472580879	RHTO_05749	727	glycosyltransferase family 8 protein	2	S	PTSPRQPRSPHYVVASPAAFANAAQTSPRQQ	X;Phospho (STY);Phospho (STY);X;X;X;X;X;X;X;X;X;X;X;X;Phospho (STY);X;X;X;X;X;X;X;X;X;X;Phospho (STY);X;X;X;X	XXXXXXXXPPPPPPPPPPPPPPPPPPPPPXX	0.00346308	75.193	75.193	_SPHYVVAS(ph)PAAFANAAQTS(ph)PR_	S(0.047)PHY(0.006)VVAS(0.947)PAAFANAAQT(0.028)S(0.972)PR
gi|472580879	RHTO_05749	738	glycosyltransferase family 8 protein	1;2	S	YVVASPAAFANAAQTSPRQQLRLQMPVSPAS	Phospho (STY);X;X;X;Phospho (STY);X;X;X;X;X;X;X;X;X;X;Phospho (STY);X;X;X;X;X;X;X;X;Oxidation (M);X;X;Phospho (STY);X;X;Phospho (STY)	PPPPPPPPPPPPPPPPPPXXXXXXXXXXXXX	4.66e-21	151.87	89.468	_S(ph)PHYVVASPAAFANAAQTS(ph)PR_	S(0.492)PHY(0.4)VVAS(0.108)PAAFANAAQT(0.006)S(0.994)PR
gi|472580879	RHTO_05749	519	glycosyltransferase family 8 protein	1	S	ASSLAKRQTGHSRRISTEEGKGGPQSGGLKG;ASSLAKRQTGHSRRISTEEGKGGPQSGGLKV	X;X;X;X;X;X;X;X;X;X;X;X;X;X;X;Phospho (STY);X;X;X;X;X;X;X;X;X;X;X;X;X;X;X	XXXXXXXXXXXXXPPPPPPPPPPPPPPPPPX	0.0122533	81.003	73.448	_RIS(ph)TEEGKGGPQSGGLK_	RIS(0.761)T(0.239)EEGKGGPQSGGLK
gi|472580879	RHTO_05749	529	glycosyltransferase family 8 protein		S	HSRRISTEEGKGGPQSGGLKGGSSTAVGGAN;HSRRISTEEGKGGPQSGGLKVGSSTAAGGAN	X;X;X;X;X;X;X;X;X;X;X;X;X;X;X;X;X;X;X;X;X;X;X;X;X;X;X;X;X;X;X	XXXXXXXXXXXXXXXXXXXXXXXXXXXXXXX	0.0122533	81.003	81.003	_RIS(ph)TEEGKGGPQSGGLK_	RIS(0.458)T(0.085)EEGKGGPQS(0.458)GGLK
gi|472580879	RHTO_05749	684	glycosyltransferase family 8 protein	1	S	SSTEEAADTGVFPPRSGQKTPTTASGVSAPT	X;X;X;X;X;X;X;X;X;X;X;X;X;X;X;Phospho (STY);X;X;X;X;X;X;X;X;X;X;X;Phospho (STY);X;X;Phospho (STY)	XXXXXXXXXXXXXXXPPPPPPPPPPPPPPPP	0.00839406	98.632	63.488	_S(ph)GQKTPTTASGVSAPTSPTR_	S(0.689)GQKT(0.2)PT(0.06)T(0.051)ASGVSAPTSPTR
gi|472580879	RHTO_05749	696	glycosyltransferase family 8 protein	1;2;3	S	PPRSGQKTPTTASGVSAPTSPTRARKDSRYV	X;X;X;Phospho (STY);X;X;X;X;X;X;Phospho (STY);X;X;X;X;Phospho (STY);X;X;Phospho (STY);Phospho (STY);X;X;X;X;X;X;X;X;X;X;X	XXXPPPPPPPPPPPPPPPPPPPPXXXXXXXX	5.91e-10	148.66	135.76	_TPTTASGVS(ph)APTS(ph)PTR_	TPTTASGVS(0.999)APT(0.21)S(0.755)PT(0.035)R
gi|472580879	RHTO_05749	700	glycosyltransferase family 8 protein	1;2;3	S	GQKTPTTASGVSAPTSPTRARKDSRYVPTSP	X;X;X;X;X;Phospho (STY);X;X;X;X;X;Phospho (STY);X;X;Phospho (STY);Phospho (STY);X;X;X;X;X;X;X;X;X;X;X;X;Phospho (STY);Phospho (STY);X	PPPPPPPPPPPPPPPPPPPXXXXXXXXXXXX	5.91e-10	148.66	95.646	_SGQKTPT(ph)TASGVSAPT(ph)S(ph)PTR_	SGQKT(0.105)PT(0.729)T(0.158)AS(0.01)GVS(0.08)APT(0.864)S(0.814)PT(0.24)R
gi|472580879	RHTO_05749	794	glycosyltransferase family 8 protein	1	S	GTGDAPPLLRATRVFSPDTDTGVVKQQGLAA	X;X;X;X;X;X;X;X;X;X;X;X;X;X;X;Phospho (STY);X;X;X;X;X;X;X;X;X;X;X;X;X;X;X	XXXXXXXXXXXXXPPPPPPPPPPPPXXXXXX	0.0126556	87.667	87.667	_VFS(ph)PDTDTGVVK_	VFS(1)PDTDTGVVK
gi|472580879	RHTO_05749	714	glycosyltransferase family 8 protein	1	S	TSPTRARKDSRYVPTSPRQPRSPHYVVASPA	Phospho (STY);Phospho (STY);X;X;X;X;X;X;X;X;X;X;X;X;X;Phospho (STY);X;X;X;X;X;Phospho (STY);X;X;Phospho (STY);X;X;X;Phospho (STY);X;X	XXXXXXXXXXXPPPPPPPXXXXXXXXXXXXX	0.0122919	108.74	81.972	_YVPTS(ph)PR_	YVPT(0.165)S(0.835)PR
gi|472580918	RHTO_05788	604	hypothetical protein	1;2	S	ELGGGEGTSIRARTDSWDGSLRSQRSHERFD	X;X;X;X;X;X;X;X;X;X;X;X;X;X;X;Phospho (STY);X;X;X;Phospho (STY);X;X;X;X;X;X;X;X;X;X;X	XXXXXXXXXXXPPPPPPPPPPPXXXXXXXXX	0.00978827	111.63	111.63	_TDS(ph)WDGSLR_	TDS(1)WDGSLR
gi|472582647	RHTO_03561	84	arsenite-resistance protein 2	2	S	YADGPEQEGRIKRRRSISPGGPPRGPPRDDY;YADGPEQEGRVKRRRSISPGGPPRGPPRDDY	X;X;X;X;X;X;X;X;X;X;X;X;X;X;X;Phospho (STY);X;Phospho (STY);X;X;X;X;X;X;X;X;X;X;X;X;X	XXXXXXXXXXXXXPPPPPPPPPPPPPPPXXX	0.00178414	114.7	72.583	_S(ph)IS(ph)PGGPPRGPPR_	S(1)IS(1)PGGPPRGPPR
gi|472582647	RHTO_03561	86	arsenite-resistance protein 2	1;2	S	DGPEQEGRIKRRRSISPGGPPRGPPRDDYYD;DGPEQEGRVKRRRSISPGGPPRGPPRDDYYD	X;X;X;X;X;X;X;X;X;X;X;X;X;Phospho (STY);X;Phospho (STY);X;X;X;X;X;X;X;X;X;X;X;X;X;X;X	XXXXXXXXXXXPPPPPPPPPPPPPPPXXXXX	0.00178414	123.67	72.583	_S(ph)IS(ph)PGGPPRGPPR_	S(1)IS(1)PGGPPRGPPR
gi|472582644	RHTO_03558	196	conserved hypothetical protein	1	S	SAQGYVAALQKDAKESSAQLGSNLQKQADKA	X;X;X;X;X;X;X;X;X;X;X;X;X;X;X;Phospho (STY);X;X;X;X;X;X;X;X;X;X;X;X;X;X;X	XXXXXXXXXXXPPPPPPPPPPPPPPPXXXXX	0.00586185	101.32	83.087	_DAKES(ph)SAQLGSNLQK_	DAKES(0.812)S(0.188)AQLGSNLQK
gi|472582644	RHTO_03558	197	conserved hypothetical protein	1	S	AQGYVAALQKDAKESSAQLGSNLQKQADKAT	X;X;X;X;X;X;X;X;X;X;X;X;X;X;X;X;X;X;X;X;X;X;X;X;X;X;X;X;X;X;X	XXXXXXXXXXXXXXXXXXXXXXXXXXXXXXX	0.00586185	101.32	101.32	_DAKES(ph)SAQLGSNLQK_	DAKES(0.5)S(0.5)AQLGSNLQK
gi|472582625	RHTO_03539	77	amino acid transmembrane transporter		S	ASSYGTAARDAQPGMSLFRYSDDEDELIASG;ASSYGTATRDAQPGMSLFRYSDDEDELIASG	X;Phospho (STY);X;X;X;X;X;X;X;X;X;X;X;X;Oxidation (M);Phospho (STY);X;X;X;X;X;X;X;X;X;X;X;X;X;X;X	XXXXXXXXXPPPPPPPPPPPPPPPPPPPPPP	0.0032329	74.579	74.579	_DAQPGM(ox)S(ph)LFRYSDDEDELIASGPYER_	DAQPGMS(0.348)LFRY(0.303)S(0.348)DDEDELIASGPYER
gi|472582625	RHTO_03539	82	amino acid transmembrane transporter	1	S	TAARDAQPGMSLFRYSDDEDELIASGPYERS;TATRDAQPGMSLFRYSDDEDELIASGPYERS	X;X;X;X;X;X;X;X;X;Oxidation (M);X;X;X;X;X;Phospho (STY);X;X;X;X;X;X;X;X;X;X;X;X;X;X;X	XXXXPPPPPPPPPPPPPPPPPPPPPPPPPPX	1.11e-06	103.31	103.31	_DAQPGM(ox)SLFRYS(ph)DDEDELIASGPYER_	DAQPGMS(0.16)LFRY(0.132)S(0.708)DDEDELIASGPYER
gi|472582578	RHTO_03492	14	E3 SUMO-protein ligase nse2	2;3	S	STMPPASKRKKHVVESDSDGSDVEVEHVERN	X;X;X;X;X;X;X;X;X;X;X;X;X;X;X;Phospho (STY);X;Phospho (STY);X;X;Phospho (STY);X;X;X;X;X;X;X;X;X;X	XXXXXXXXXXPPPPPPPPPPPPPPPPPPPPX	1.36e-05	120.13	120.13	_KHVVES(ph)DS(ph)DGS(ph)DVEVEHVER_	KHVVES(1)DS(1)DGS(1)DVEVEHVER
gi|472582578	RHTO_03492	16	E3 SUMO-protein ligase nse2	2;3	S	MPPASKRKKHVVESDSDGSDVEVEHVERNDK	X;X;X;X;X;X;X;X;X;X;X;X;X;Phospho (STY);X;Phospho (STY);X;X;Phospho (STY);X;X;X;X;X;X;X;X;X;X;X;X	XXXXXXXXPPPPPPPPPPPPPPPPPPPPXXX	1.36e-05	120.13	120.13	_KHVVES(ph)DS(ph)DGS(ph)DVEVEHVER_	KHVVES(1)DS(1)DGS(1)DVEVEHVER
gi|472582578	RHTO_03492	19	E3 SUMO-protein ligase nse2	3	S	ASKRKKHVVESDSDGSDVEVEHVERNDKILQ	X;X;X;X;X;X;X;X;X;X;Phospho (STY);X;Phospho (STY);X;X;Phospho (STY);X;X;X;X;X;X;X;X;X;X;X;X;X;X;X	XXXXXPPPPPPPPPPPPPPPPPPPPXXXXXX	1.36e-05	120.13	120.13	_KHVVES(ph)DS(ph)DGS(ph)DVEVEHVER_	KHVVES(1)DS(1)DGS(1)DVEVEHVER
gi|472582555	RHTO_03469	38	mitochondrial inner membrane translocase complex, subunit Tim17/22	1	S	PPLEPTQLPKAYHPDSPVARGAEGAMFGGGV	X;X;X;X;X;X;X;X;X;X;X;X;X;X;X;Phospho (STY);X;X;X;X;X;X;X;X;X;X;X;X;X;X;X	XXXXXXXXXXPPPPPPPPPPXXXXXXXXXXX	0.00272091	114.24	114.24	_AYHPDS(ph)PVAR_	AYHPDS(1)PVAR
gi|472584725	RHTO_01065	699	nuclear GTP-binding protein	1;3	S	KRPAGKKRTRAIDVVSSDEESDGGRPAKEKR	X;X;X;X;X;X;X;X;X;X;X;X;X;X;X;Phospho (STY);Phospho (STY);X;X;X;Phospho (STY);X;X;X;X;X;X;X;X;X;X	XXXXXXXXXXPPPPPPPPPPPPPPPPPPPPP	0.00192261	93.255	81.312	_AIDVVS(ph)S(ph)DEES(ph)DGGRPAKEKR_	AIDVVS(1)S(1)DEES(1)DGGRPAKEKR
gi|472584725	RHTO_01065	700	nuclear GTP-binding protein	3	S	RPAGKKRTRAIDVVSSDEESDGGRPAKEKRM	X;X;X;X;X;X;X;X;X;X;X;X;X;X;Phospho (STY);Phospho (STY);X;X;X;Phospho (STY);X;X;X;X;X;X;X;X;X;X;X	XXXXXXXXXPPPPPPPPPPPPPPPPPPPPPX	0.00192261	91.729	81.312	_AIDVVS(ph)S(ph)DEES(ph)DGGRPAKEKR_	AIDVVS(1)S(1)DEES(1)DGGRPAKEKR
gi|472584725	RHTO_01065	704	nuclear GTP-binding protein	3	S	KKRTRAIDVVSSDEESDGGRPAKEKRMTTNK	X;X;X;X;X;X;X;X;X;X;Phospho (STY);Phospho (STY);X;X;X;Phospho (STY);X;X;X;X;X;X;X;X;X;X;X;X;X;X;X	XXXXXPPPPPPPPPPPPPPPPPPPPPXXXXX	0.00192261	91.729	81.312	_AIDVVS(ph)S(ph)DEES(ph)DGGRPAKEKR_	AIDVVS(1)S(1)DEES(1)DGGRPAKEKR
gi|472584719	RHTO_01059	813	RNA Polymerase II CTD phosphatase Fcp1	1	S	VKTARSRKSGLKRSVSAAALERSAEKAAEDG	X;X;X;X;X;X;X;X;X;X;X;X;X;X;X;Phospho (STY);X;X;X;X;X;X;X;X;X;X;X;X;X;X;X	XXXXXXXXXXXXXPPPPPPPPPXXXXXXXXX	0.000709886	152.4	141.58	_SVS(ph)AAALER_	SVS(1)AAALER
gi|472584682	RHTO_01022	35	RNA binding protein	1	S	ALEFRAKKKGKAVAPSFEDEVAEIEERENGG	X;X;X;X;X;X;X;X;X;X;X;X;X;X;X;Phospho (STY);X;X;X;X;X;X;X;X;X;X;X;X;X;X;X	XXXXXXXXXXXPPPPPPPPPPPPPPPPXXXX	0.000104021	120.53	120.53	_AVAPS(ph)FEDEVAEIEER_	AVAPS(1)FEDEVAEIEER
gi|472584588	RHTO_00928	264	zeta toxin, P-loop nucleoside triphosphate hydrolase	1	S	AAVAKSQKRSLVIDGSLTDCKCVRLIDNSSD	X;X;X;X;X;X;X;X;X;X;X;X;X;X;X;Phospho (STY);X;X;X;X;X;X;X;X;X;X;X;X;X;X;X	XXXXXXXXXPPPPPPPPPPPPXXXXXXXXXX	0.000195067	154.69	153.94	_SLVIDGS(ph)LTDCK_	SLVIDGS(0.997)LT(0.003)DCK
gi|472584575	RHTO_00915	631	conserved hypothetical protein	2	S	AAAATAAISPRKRGRSESPAPNLNSTSSGEG	X;X;X;X;X;X;X;X;X;X;X;X;X;X;X;Phospho (STY);X;Phospho (STY);X;X;X;X;X;X;Phospho (STY);X;X;X;X;X;X	XXXXXXXXXXXXXPPPPPPPPPPPPPPPPPP	5.63e-19	125.77	99.228	_GRS(ph)ES(ph)PAPNLNSTSSGEGSTAAAHALLATAK_	GRS(1)ES(0.999)PAPNLNSTSSGEGSTAAAHALLATAK
gi|472584575	RHTO_00915	633	conserved hypothetical protein	2	S	AATAAISPRKRGRSESPAPNLNSTSSGEGST	X;X;X;X;X;X;X;X;X;X;X;X;X;Phospho (STY);X;Phospho (STY);X;X;X;X;X;X;X;X;X;X;X;X;X;X;X	XXXXXXXXXXXPPPPPPPPPPPPPPPPPPPP	5.63e-19	125.77	72.474	_GRS(ph)ES(ph)PAPNLNSTSSGEGSTAAAHALLATAK_	GRS(1)ES(1)PAPNLNSTSSGEGSTAAAHALLATAK
gi|472584575	RHTO_00915	640	conserved hypothetical protein		S	PRKRGRSESPAPNLNSTSSGEGSTAAAHALL	X;X;X;X;X;X;Phospho (STY);X;X;X;X;X;X;X;X;Phospho (STY);X;X;X;X;X;X;X;X;X;X;X;X;X;X;X	XXXXPPPPPPPPPPPPPPPPPPPPPPPPPPP	2.2e-09	100.37	89.742	_GRS(ph)ESPAPNLNS(ph)TSSGEGSTAAAHALLATAK_	GRS(0.779)ES(0.25)PAPNLNS(0.416)T(0.286)S(0.252)S(0.016)GEGSTAAAHALLATAK
gi|472584562	RHTO_00902	1593	hypothetical protein	2	S	HSQHSSSDASHRRRESSLLASPTLTMSRTTS;RSQHSSSDTTRRRRESSLLASPTLTMSRTTS	X;X;X;X;Phospho (STY);Phospho (STY);Phospho (STY);X;X;X;X;X;X;X;X;Phospho (STY);Phospho (STY);X;X;X;X;X;X;X;X;Oxidation (M);X;X;X;X;X	XXXXXXXXXXXXPPPPPPPPPPPPPPPPXXX	0.000204477	120.92	120.92	_RRES(ph)S(ph)LLASPTLTM(ox)SR_	RRES(1)S(1)LLASPTLTMSR
gi|472584562	RHTO_00902	1594	hypothetical protein	2	S	SQHSSSDASHRRRESSLLASPTLTMSRTTSV;SQHSSSDTTRRRRESSLLASPTLTMSRTTSA	X;X;X;Phospho (STY);Phospho (STY);Phospho (STY);X;X;X;X;X;X;X;X;Phospho (STY);Phospho (STY);X;X;X;X;X;X;X;X;Oxidation (M);X;X;X;X;X;X	XXXXXXXXXXXPPPPPPPPPPPPPPPPXXXX	0.000204477	120.92	120.92	_RRES(ph)S(ph)LLASPTLTM(ox)SR_	RRES(1)S(1)LLASPTLTMSR
gi|472584562	RHTO_00902	1598	hypothetical protein	1	S	SSDASHRRRESSLLASPTLTMSRTTSVNTAR;SSDTTRRRRESSLLASPTLTMSRTTSANTAR	Phospho (STY);Phospho (STY);X;X;X;X;X;X;X;X;X;X;X;X;X;Phospho (STY);X;X;X;X;Oxidation (M);X;X;X;X;X;X;X;X;X;X	XXXXXXXXXPPPPPPPPPPPPPPXXXXXXXX	3.71e-08	157.47	157.47	_ESSLLAS(ph)PTLTM(ox)SR_	ESSLLAS(0.958)PT(0.041)LTMSR
gi|472584562	RHTO_00902	456	hypothetical protein	1	S	PVDAAKKEEHRGRSLSALLGQARASFGLRGS;PVDPAKKEEHRGRSLSALLGQARASFGLRGS	X;X;X;X;X;X;X;X;X;X;X;X;X;X;X;Phospho (STY);X;X;X;X;X;X;X;X;X;X;X;X;X;X;X	XXXXXXXXXXXXXPPPPPPPPPPXXXXXXXX	0.00103509	132.79	132.79	_SLS(ph)ALLGQAR_	S(0.082)LS(0.918)ALLGQAR
gi|472586220	RHTO_06807	147	zuotin	1	S	KVLRHHPDKKANAGGSANDDSFFKCIAKAMD	X;X;X;X;X;X;X;X;X;X;X;X;X;X;X;Phospho (STY);X;X;X;X;X;X;X;X;X;X;X;X;X;X;X	XXXXXXXXXXPPPPPPPPPPPPPPXXXXXXX	3.75e-06	137.89	114.03	_ANAGGS(ph)ANDDSFFK_	ANAGGS(1)ANDDSFFK
gi|472586235	RHTO_06822	11	MFS transporter, PHS family, inorganic phosphate transporter	1;2	S	_____MSIEGKEAAISEPSLNQQGGAVDLNA	X;X;X;X;X;X;X;X;X;X;X;X;X;X;X;Phospho (STY);X;X;Phospho (STY);X;X;X;X;X;X;X;X;X;X;X;X	XXXXXXXXXXXPPPPPPPPPPPPPPPPPPPP	1.39e-125	179.64	101.47	_EAAIS(ph)EPS(ph)LNQQGGAVDLNAR_	EAAIS(1)EPS(1)LNQQGGAVDLNAR
gi|472586235	RHTO_06822	14	MFS transporter, PHS family, inorganic phosphate transporter	1;2	S	__MSIEGKEAAISEPSLNQQGGAVDLNARRR	X;X;X;X;X;X;X;X;X;X;X;X;Phospho (STY);X;X;Phospho (STY);X;X;X;X;X;X;X;X;X;X;X;X;X;X;X	XXXXXXXXPPPPPPPPPPPPPPPPPPPPPXX	0	250.7	101.47	_EAAIS(ph)EPS(ph)LNQQGGAVDLNAR_	EAAIS(1)EPS(1)LNQQGGAVDLNAR
gi|472586268	RHTO_06855	66	bZIP transcription factor	2	S	KPTDGTLTAGGRRARSTSPSALLPRATPGGL	X;X;X;X;X;X;X;X;X;X;X;X;X;X;X;Phospho (STY);Phospho (STY);X;X;X;X;X;X;X;X;X;X;X;X;X;X	XXXXXXXXXXXXXPPPPPPPPPPPPXXXXXX	4.74e-05	162.26	140.46	_ARS(ph)T(ph)SPSALLPR_	ARS(0.997)T(0.845)S(0.057)PS(0.102)ALLPR
gi|472586268	RHTO_06855	68	bZIP transcription factor	2	S	TDGTLTAGGRRARSTSPSALLPRATPGGLQR	X;X;X;X;X;X;X;X;X;X;X;X;X;X;X;X;X;X;X;X;X;X;X;X;X;X;X;X;X;X;X	XXXXXXXXXXXXXXXXXXXXXXXXXXXXXXX	0.00249392	133.07	133.07	_ARS(ph)T(ph)SPSALLPR_	ARS(0.667)T(0.667)S(0.667)PSALLPR
gi|472586268	RHTO_06855	70	bZIP transcription factor		S	GTLTAGGRRARSTSPSALLPRATPGGLQRLP	X;X;X;X;X;X;X;X;X;X;X;X;X;X;X;X;X;X;X;X;X;X;X;X;X;X;X;X;X;X;X	XXXXXXXXXXXXXXXXXXXXXXXXXXXXXXX	4.74e-05	162.26	162.26	_ARS(ph)T(ph)SPSALLPR_	ARS(0.991)T(0.409)S(0.194)PS(0.406)ALLPR
gi|472586273	RHTO_06860	346	hypothetical protein	1	S	PSRAAAAAASNAAQLSPRAPAFAPSPPSPPT	X;X;X;X;X;X;X;X;X;X;X;X;X;X;X;Phospho (STY);X;X;X;X;X;X;X;X;X;X;X;X;X;X;X	XXXPPPPPPPPPPPPPPPXXXXXXXXXXXXX	1.25e-38	190.31	170.53	_AAAAAASNAAQLS(ph)PR_	AAAAAASNAAQLS(1)PR
gi|472586276	RHTO_06863	23	Sfi1 spindle body domain protein		S	DSQTQSSTLEPFPPLSSSQRNLINHTLALLA	X;X;X;X;X;X;X;X;X;X;X;X;X;X;X;Phospho (STY);X;X;X;X;X;X;X;X;X;X;X;X;X;X;X	PPPPPPPPPPPPPPPPPPPPXXXXXXXXXXX	0.000962134	75.054	75.054	_APHPGDDSQTQSSTLEPFPPLS(ph)SSQR_	APHPGDDSQTQSSTLEPFPPLS(0.333)S(0.333)S(0.333)QR
gi|472586276	RHTO_06863	24	Sfi1 spindle body domain protein		S	SQTQSSTLEPFPPLSSSQRNLINHTLALLAH	X;X;X;X;X;X;X;X;X;X;X;X;X;X;X;X;X;X;X;X;X;X;X;X;X;X;X;X;X;X;X	XXXXXXXXXXXXXXXXXXXXXXXXXXXXXXX	0.000962134	75.054	75.054	_APHPGDDSQTQSSTLEPFPPLS(ph)SSQR_	APHPGDDSQTQSSTLEPFPPLS(0.333)S(0.333)S(0.333)QR
gi|472586276	RHTO_06863	25	Sfi1 spindle body domain protein		S	QTQSSTLEPFPPLSSSQRNLINHTLALLAHD	X;X;X;X;X;X;X;X;X;X;X;X;X;X;X;X;X;X;X;X;X;X;X;X;X;X;X;X;X;X;X	XXXXXXXXXXXXXXXXXXXXXXXXXXXXXXX	0.000962134	75.054	75.054	_APHPGDDSQTQSSTLEPFPPLS(ph)SSQR_	APHPGDDSQTQSSTLEPFPPLS(0.333)S(0.333)S(0.333)QR
gi|472586325	RHTO_06912	1257	hypothetical protein	1;2	S	AGANLDEGARAAARQSPTISLRTRNRDLPEL	X;X;X;X;X;X;X;X;X;X;X;X;X;X;X;Phospho (STY);X;X;X;Phospho (STY);X;X;X;X;X;X;X;X;X;X;X	XXXXXXXXXXPPPPPPPPPPPPXXXXXXXXX	0.00300886	124.67	124.67	_QS(ph)PTISLR_	QS(1)PTISLR
gi|472586325	RHTO_06912	1261	hypothetical protein	2	S	LDEGARAAARQSPTISLRTRNRDLPELPADA;LDEGARAAARQSPTISLRTRNRDLPELPANA	X;X;X;X;X;X;X;X;X;X;X;Phospho (STY);X;X;X;Phospho (STY);X;X;X;X;X;X;X;X;X;X;X;X;X;X;X	XXXXXXPPPPPPPPPPPPXXXXXXXXXXXXX	0.00468514	103.5	87.429	_AAARQS(ph)PTIS(ph)LR_	AAARQS(0.99)PT(0.012)IS(0.999)LR
gi|472586325	RHTO_06912	1350	hypothetical protein	1	S	PSDSPSGRKSRLRISSGGLGAALKNAFTPNK	X;X;X;X;X;X;X;X;X;X;X;X;X;X;X;Phospho (STY);X;X;X;X;X;X;X;X;X;X;X;X;X;X;X	XXXXXXXXXXXXXPPPPPPPPPPPXXXXXXX	0.000190728	122.46	122.46	_ISS(ph)GGLGAALK_	ISS(1)GGLGAALK
gi|472580533	RHTO_06468	404	inositol-3-phosphate synthase	1	S	IASYNHLGNNDGKNLSAPAQFRSKEISKASV	X;X;X;X;X;X;X;X;X;X;X;X;X;X;X;Phospho (STY);X;X;X;X;X;X;X;X;X;X;X;X;X;X;X	XXXXXXXXXXXXXPPPPPPPPPXXXXXXXXX	0.00945443	95.477	95.477	_NLS(ph)APAQFR_	NLS(1)APAQFR
gi|472581641	RHTO_04562	43	transcription initiation factor TFIID subunit 11	2	S	TKKPKKGTTAGGDAGSPPPYGSAAASPVGAS	X;X;X;X;X;X;X;X;X;X;X;X;X;X;X;Phospho (STY);X;X;X;X;X;X;X;X;X;X;X;X;X;X;Phospho (STY)	XXXXXPPPPPPPPPPPPPPPPPPPPPPPPPP	0.00864407	52.577	52.577	_KGTTAGGDAGS(ph)PPPYGSAAASPVGASS(ph)PPAYADSPAAFGGGGKR_	KGT(0.029)T(0.029)AGGDAGS(0.919)PPPY(0.021)GS(0.03)AAAS(0.025)PVGAS(0.087)S(0.294)PPAY(0.272)ADS(0.294)PAAFGGGGKR
gi|472581641	RHTO_04562	59	transcription initiation factor TFIID subunit 11		S	PPPYGSAAASPVGASSPPAYADSPAAFGGGG	X;X;X;X;X;X;X;X;X;X;X;X;X;X;X;Phospho (STY);X;X;X;X;X;X;X;X;X;X;X;X;X;X;X	PPPPPPPPPPPPPPPPPPPPPPPPPPPPPPP	0.00864407	52.577	48.265	_KGTTAGGDAGS(ph)PPPYGSAAASPVGAS(ph)SPPAYADSPAAFGGGGKR_	KGT(0.2)T(0.2)AGGDAGS(0.585)PPPY(0.008)GS(0.008)AAAS(0.019)PVGAS(0.443)S(0.443)PPAY(0.075)ADS(0.021)PAAFGGGGKR
gi|472581641	RHTO_04562	66	transcription initiation factor TFIID subunit 11		S	AASPVGASSPPAYADSPAAFGGGGKRERSAS	X;X;X;X;X;X;X;X;X;X;X;X;X;X;X;X;X;X;X;X;X;X;X;X;X;X;X;X;Phospho (STY);X;Phospho (STY)	XXXXXXXXXXXXXXXXXXXXXXXXXXXXXXX	0.00864407	52.577	52.577	_KGTTAGGDAGS(ph)PPPYGSAAASPVGASS(ph)PPAYADSPAAFGGGGKR_	KGT(0.029)T(0.029)AGGDAGS(0.919)PPPY(0.021)GS(0.03)AAAS(0.025)PVGAS(0.087)S(0.294)PPAY(0.272)ADS(0.294)PAAFGGGGKR
gi|472581614	RHTO_04534	889	hypothetical protein	2	S	YRRPLGNKGLVSDNESDSDDSEAIVTNRRLS	Phospho (STY);X;X;X;X;X;X;X;X;X;X;X;X;X;X;Phospho (STY);X;Phospho (STY);X;X;X;X;X;X;X;X;X;X;X;X;X	XXXXXXXXPPPPPPPPPPPPPPPPPPPPPXX	0.00045727	95.409	78.837	_GLVSDNES(ph)DS(ph)DDSEAIVTNRR_	GLVS(0.003)DNES(0.998)DS(0.998)DDS(0.001)EAIVT(0.001)NRR
gi|472581614	RHTO_04534	891	hypothetical protein	1;2	S	RPLGNKGLVSDNESDSDDSEAIVTNRRLSML	X;X;X;X;X;X;X;X;X;X;X;X;X;Phospho (STY);X;Phospho (STY);X;X;X;X;X;X;X;X;X;X;X;X;X;X;X	XXXXXXPPPPPPPPPPPPPPPPPPPPPXXXX	0.00045727	95.409	78.837	_GLVSDNES(ph)DS(ph)DDSEAIVTNRR_	GLVS(0.003)DNES(0.998)DS(0.998)DDS(0.001)EAIVT(0.001)NRR
gi|472581614	RHTO_04534	894	hypothetical protein		S	GNKGLVSDNESDSDDSEAIVTNRRLSMLILN	X;X;X;X;X;X;X;X;X;X;X;X;X;X;X;Phospho (STY);X;X;X;X;X;X;X;X;X;X;X;X;X;X;X	XXXPPPPPPPPPPPPPPPPPPPPPXXXXXXX	0.00470961	63.827	63.827	_GLVSDNESDSDDS(ph)EAIVTNRR_	GLVS(0.001)DNES(0.015)DS(0.45)DDS(0.464)EAIVT(0.07)NRR
gi|472581614	RHTO_04534	544	hypothetical protein	1	S	SFAVDLPAAPSRLQVSPKKTASTLVRPAPPE;SFPVDLPAAPSRLQVSPKKTASTLVRPAPLE	X;X;X;X;X;X;X;X;X;X;X;X;X;X;X;Phospho (STY);X;X;X;X;X;X;X;X;X;X;X;X;X;X;X	XXXXXXXXXXXXPPPPPPXXXXXXXXXXXXX	0.0079594	111.17	111.17	_LQVS(ph)PK_	LQVS(1)PK
gi|472581601	RHTO_04521	792	tetratricopeptide repeat containing protein	1;2	S	PPVSNAGGGTVSRAASIVSRRKSVKRQSQAI	X;X;X;X;X;X;X;X;X;X;X;X;X;X;X;Phospho (STY);X;X;Phospho (STY);X;X;X;X;X;X;X;X;X;X;X;X	XXXXXXXXXXXXXPPPPPPPPXXXXXXXXXX	0.00399134	130.77	106.67	_AAS(ph)IVS(ph)RR_	AAS(1)IVS(1)RR
gi|472581601	RHTO_04521	795	tetratricopeptide repeat containing protein	2	S	SNAGGGTVSRAASIVSRRKSVKRQSQAIHGA	X;X;X;X;X;X;X;X;X;X;X;X;Phospho (STY);X;X;Phospho (STY);X;X;X;X;X;X;X;X;X;X;X;X;X;X;X	XXXXXXXXXXPPPPPPPPXXXXXXXXXXXXX	0.00399134	106.67	106.67	_AAS(ph)IVS(ph)RR_	AAS(1)IVS(1)RR
gi|472581598	RHTO_04518	618	SFP1, transcription regulator		S	GTGGHHQLAQSFTASSSANSSRASSPAAHHR	X;X;X;X;X;X;X;X;X;X;X;X;X;X;X;Phospho (STY);Phospho (STY);X;X;X;X;X;X;X;X;X;X;X;X;X;X	PPPPPPPPPPPPPPPPPPPPPPXXXXXXXXX	0.00121472	75.524	75.524	_GTGGHHQLAQSFTASS(ph)S(ph)ANSSR_	GTGGHHQLAQSFT(0.012)AS(0.43)S(0.487)S(0.654)ANS(0.223)S(0.195)R
gi|472581598	RHTO_04518	619	SFP1, transcription regulator	2	S	TGGHHQLAQSFTASSSANSSRASSPAAHHRF	X;X;X;X;X;X;X;X;X;X;X;X;X;X;Phospho (STY);Phospho (STY);X;X;X;X;X;X;X;X;X;X;X;X;X;X;X	PPPPPPPPPPPPPPPPPPPPPXXXXXXXXXX	0.00121472	75.524	75.524	_GTGGHHQLAQSFTASS(ph)S(ph)ANSSR_	GTGGHHQLAQSFT(0.012)AS(0.43)S(0.487)S(0.654)ANS(0.223)S(0.195)R
gi|472581585	RHTO_04505	242	structural maintenance of chromosome 4	1	S	EVKPRVSASKRKKRVSLAPASPVKQPVLPTP	X;X;X;X;X;X;X;X;X;X;X;X;X;X;X;Phospho (STY);X;X;X;X;X;X;X;X;X;X;X;X;X;X;X	XXXXXXXXXXXXXPPPPPPPPPPPXXXXXXX	0.0107641	70.98	70.98	_RVS(ph)LAPASPVK_	RVS(0.999)LAPAS(0.001)PVK
gi|472581573	RHTO_04493	56	polypeptide N-acetylglucosaminyltransferase, glycosyltransferase family 41 protein		S	SSDLGTVGSPAKKRKSSVSGAMPILAPSEPV	X;X;X;X;X;X;X;X;X;X;X;X;X;X;X;Phospho (STY);X;X;X;X;X;Oxidation (M);X;X;X;X;X;X;X;X;X	XXXXXXXXXXXXXXPPPPPPPPPPPPPPPPP	0.00149693	91.317	91.317	_KS(ph)SVSGAM(ox)PILAPSEPVAR_	KS(0.492)S(0.492)VS(0.016)GAMPILAPSEPVAR
gi|472581573	RHTO_04493	57	polypeptide N-acetylglucosaminyltransferase, glycosyltransferase family 41 protein		S	SDLGTVGSPAKKRKSSVSGAMPILAPSEPVA	X;X;X;X;X;X;X;X;X;X;X;X;X;X;X;X;X;X;X;X;X;X;X;X;X;X;X;X;X;X;X	XXXXXXXXXXXXXXXXXXXXXXXXXXXXXXX	0.00149693	91.317	91.317	_KS(ph)SVSGAM(ox)PILAPSEPVAR_	KS(0.492)S(0.492)VS(0.016)GAMPILAPSEPVAR
gi|472581573	RHTO_04493	590	polypeptide N-acetylglucosaminyltransferase, glycosyltransferase family 41 protein	1	S	EEVEELVGSREGRRGSAGMEELGKILERAGS	X;X;X;X;X;X;X;X;X;X;X;X;X;X;X;Phospho (STY);X;X;Oxidation (M);X;X;X;X;X;X;X;X;X;X;X;X	XXXXXXXXXXXXXPPPPPPPPPPPXXXXXXX	0.00138046	96.993	96.993	_RGS(ph)AGM(ox)EELGK_	RGS(1)AGMEELGK
gi|472581567	RHTO_04487	544	MAK protein kinase	1	S	VSTTGLSTKAGSSLASPRDLPPSHTYSHGSA	X;X;X;X;X;X;X;X;X;X;X;X;X;X;X;Phospho (STY);X;X;X;X;X;X;X;X;X;X;X;X;X;X;X	XXXXXXXXXPPPPPPPPPXXXXXXXXXXXXX	0.0100686	98.156	98.156	_AGSSLAS(ph)PR_	AGS(0.001)S(0.005)LAS(0.994)PR
gi|472581089	RHTO_05591	224	BAR domain protein	1	S	QAAMKARQNVTKARVSLDATRAQFKNATGQK	X;X;X;X;X;X;X;X;X;X;X;X;X;X;X;Phospho (STY);X;X;X;X;X;X;X;X;X;X;X;X;X;X;X	XXXXXXXXXXXXPPPPPPPPPXXXXXXXXXX	0.0129067	126.1	126.1	_ARVS(ph)LDATR_	ARVS(0.997)LDAT(0.003)R
gi|472581073	RHTO_05575	748	ribosome biogenesis protein BMS1	1	S	KEELKRKFDAQYDDDSDEEKMDFYTEQKAEM	X;X;X;X;X;X;X;X;X;X;X;X;X;X;X;Phospho (STY);X;X;X;X;Oxidation (M);X;X;X;X;X;X;X;X;X;X	XXXXXXPPPPPPPPPPPPPPPPPPPPPPXXX	2.13e-11	127.59	117.3	_KFDAQYDDDS(ph)DEEKM(ox)DFYTEQK_	KFDAQYDDDS(1)DEEKMDFYTEQK
gi|472581047	RHTO_05549	685	carbamoyl-phosphate synthase / aspartate carbamoyltransferase	1	S	EKELVELCTKAFATSSQVLVERSMKGWKEIE	X;X;X;X;X;X;X;X;X;X;X;X;X;X;X;Phospho (STY);X;X;X;X;X;X;X;X;X;X;X;X;X;X;X	XXXXXXXXXXPPPPPPPPPPPPXXXXXXXXX	0.00213852	157.68	157.68	_AFATSS(ph)QVLVER_	AFAT(0.003)S(0.147)S(0.85)QVLVER
gi|472581047	RHTO_05549	1941	carbamoyl-phosphate synthase / aspartate carbamoyltransferase	1	S	MPTRENVTSPTMAPVSSQALATKSPKLASAR	Oxidation (M);X;X;X;X;X;X;X;X;X;X;Oxidation (M);X;X;X;Phospho (STY);X;X;X;X;X;X;X;X;X;X;X;X;X;X;X	XXXXPPPPPPPPPPPPPPPPPPPPPPXXXXX	0.00102714	91.589	91.589	_ENVTSPTM(ox)APVS(ph)SQALATKSPK_	ENVTSPT(0.008)MAPVS(0.859)S(0.03)QALAT(0.03)KS(0.072)PK
gi|472581047	RHTO_05549	1949	carbamoyl-phosphate synthase / aspartate carbamoyltransferase	1	S	SPTMAPVSSQALATKSPKLASARSPRLEATE	X;X;X;Oxidation (M);X;X;X;X;X;X;X;X;X;X;X;Phospho (STY);X;X;X;X;X;X;X;Phospho (STY);X;X;X;X;X;X;X	PPPPPPPPPPPPPPPPPPXXXXXXXXXXXXX	0.00617725	70.335	70.335	_ENVTSPTM(ox)APVSSQALATKS(ph)PK_	ENVTSPTMAPVS(0.048)S(0.048)QALAT(0.391)KS(0.513)PK
gi|472581047	RHTO_05549	1957	carbamoyl-phosphate synthase / aspartate carbamoyltransferase	1	S	SQALATKSPKLASARSPRLEATESALQPSLM	X;X;X;X;X;Phospho (STY);X;Phospho (STY);X;X;X;X;X;X;X;Phospho (STY);X;X;X;X;X;X;X;X;X;X;X;X;X;X;X	XXXXXXXXXXPPPPPPPPXXXXXXXXXXXXX	0.0127418	126.71	126.71	_LASARS(ph)PR_	LAS(0.003)ARS(0.997)PR
gi|472581035	RHTO_05537	1369	protein transporter	1	S	PRQDAASPFARQDAPSPFARQGAASPFGRQN;PRQDASSPFARQDAPSPFARQGAASPFGRQN	X;X;X;X;X;X;X;X;X;X;X;X;X;X;X;Phospho (STY);X;X;X;X;X;X;X;X;Phospho (STY);X;X;X;X;X;X	XXXXXXXXXXXPPPPPPPPPXXXXXXXXXXX	0.00959786	96.103	96.103	_QDAPS(ph)PFAR_	QDAPS(1)PFAR
gi|472581035	RHTO_05537	1378	protein transporter	1	S	ARQDAPSPFARQGAASPFGRQNAASPFQHAS;ARQDAPSPFARQGAASPFGRQNATSPFQHAS	X;X;X;X;X;X;Phospho (STY);X;X;X;X;X;X;X;X;Phospho (STY);X;X;X;X;X;X;X;X;Phospho (STY);X;X;X;X;X;X	XXXXXXXXXXXPPPPPPPPPXXXXXXXXXXX	0.0104685	101.39	76.326	_QGAAS(ph)PFGR_	QGAAS(1)PFGR
gi|472581036	RHTO_05538	261	MFS transporter	1	S	EALPARPLSRRTGSSSPLLQDEAKSMRHSAG	X;X;X;X;X;X;X;X;X;X;X;X;X;X;X;Phospho (STY);X;X;X;X;X;X;X;X;X;X;X;X;X;X;X	XXXXXXXXXXPPPPPPPPPPPPPPXXXXXXX	0.010405	89.374	89.374	_RTGSSS(ph)PLLQDEAK_	RT(0.016)GS(0.016)S(0.016)S(0.952)PLLQDEAK
gi|472581035	RHTO_05537	1091	protein transporter	1	S	KASAAPPPPRSSAFPSPRTRRALQSSTSSTS;KTSAAPPPPRSSAFPSPRTRRALQSSTSSTS	X;X;X;X;X;X;X;X;X;X;X;X;X;X;X;Phospho (STY);X;X;X;X;X;X;X;X;X;X;X;X;X;X;X	XXXXXXXXXXPPPPPPPPXXXXXXXXXXXXX	0.0054127	107.06	107.06	_SSAFPS(ph)PR_	SSAFPS(1)PR
gi|472583046	RHTO_02656	585	zinc finger, GATA-type protein	1	S	PRDPQSGCANCKRRKSTTWREGKGPDGKLMS	X;X;X;X;X;X;X;X;X;X;X;X;X;X;X;Phospho (STY);X;X;X;X;X;X;X;X;X;X;X;X;X;X;X	XXXXXXXXXXXXXXPPPPPPXXXXXXXXXXX	0.00249171	104.21	104.21	_KS(ph)TTWR_	KS(0.999)T(0.001)TWR
gi|472583045	RHTO_02655	162	GTP binding protein	1;2	S	GRKKSSDSLARSRSSSPGAPLMPVRQATAAT;GRKKSSDSLARSRSSSPGAPLMPVRQATAVP	X;X;X;X;X;X;X;X;X;X;X;X;X;Phospho (STY);Phospho (STY);Phospho (STY);X;X;X;X;X;Oxidation (M);X;X;X;X;X;X;X;X;X	XXXXXXXXXXXPPPPPPPPPPPPPPXXXXXX	0.00191533	139.86	81.904	_SSS(ph)PGAPLM(ox)PVR_	SS(0.002)S(0.998)PGAPLMPVR
gi|472583008	RHTO_02618	391	conserved fungal protein	2	S	RSQREASIASTRSRASEAGSSTTPAPPPVAS	X;X;X;X;X;X;X;X;X;X;X;X;X;X;X;Phospho (STY);X;X;X;Phospho (STY);X;X;X;X;X;X;X;X;X;X;X	XXXXXXXXXXXXPPPPPPPPPPPPPPPPPPP	0.00633566	72.145	72.145	_SRAS(ph)EAGS(ph)STTPAPPPVASSSSSTRR_	S(0.009)RAS(0.887)EAGS(0.645)S(0.149)T(0.149)T(0.149)PAPPPVAS(0.005)S(0.005)SSSTRR
gi|472583008	RHTO_02618	395	conserved fungal protein	2	S	EASIASTRSRASEAGSSTTPAPPPVASSSSS	X;X;X;X;X;X;X;X;X;X;X;Phospho (STY);X;X;X;Phospho (STY);X;X;X;X;X;X;X;X;X;X;X;X;X;X;X	XXXXXXXXPPPPPPPPPPPPPPPPPPPPPPP	0.00633566	72.145	72.145	_SRAS(ph)EAGS(ph)STTPAPPPVASSSSSTRR_	S(0.009)RAS(0.887)EAGS(0.645)S(0.149)T(0.149)T(0.149)PAPPPVAS(0.005)S(0.005)SSSTRR
gi|472583008	RHTO_02618	165	conserved fungal protein	1	S	DRQPAYARTPAPLQASPRSNAAPDPSSYSIA	X;X;X;X;X;X;X;X;X;X;X;X;X;X;X;Phospho (STY);X;X;X;X;X;X;X;X;X;X;X;X;X;X;X	XXXXXXXXPPPPPPPPPPXXXXXXXXXXXXX	0.00203568	122.97	122.97	_TPAPLQAS(ph)PR_	TPAPLQAS(1)PR
gi|472582998	RHTO_02608	218	ORMDL family protein	1;2;3	S	IKFFDAGDIGPTPDPSAPPTPKDEQHLR___	X;X;X;X;X;X;X;X;X;X;X;Phospho (STY);X;X;X;Phospho (STY);X;X;X;Phospho (STY);X;X;X;X;X;X;X;X;X;X;X	XXPPPPPPPPPPPPPPPPPPPPPPPPPPXXX	8.21e-08	97.877	57.293	_FFDAGDIGPT(ph)PDPS(ph)APPT(ph)PKDEQHLR_	FFDAGDIGPT(1)PDPS(1)APPT(1)PKDEQHLR
gi|472582966	RHTO_02576	403	WetA	1	S	SPPRGSAPLNRRRGSSLDPSIPRSFGSSGLV	X;X;X;X;X;X;X;X;X;X;X;X;X;X;X;Phospho (STY);X;X;X;X;X;X;X;X;X;X;X;X;X;X;X	XXXXXXXXXXXXXPPPPPPPPPPXXXXXXXX	2.07e-09	169.89	169.89	_GSS(ph)LDPSIPR_	GS(0.001)S(0.999)LDPSIPR
gi|472582939	RHTO_02549	376	Rho guanyl-nucleotide exchange factor	2	S	LDRVDYRHPFDGRPASAAPALEVSQSPTSRD;SDRVEYRHPFDGRPASAAPALEVSQSPTSRD	X;X;X;X;X;X;X;X;X;X;X;X;X;X;X;Phospho (STY);X;X;X;X;X;X;X;X;X;Phospho (STY);X;X;X;X;X	XXXXXXXPPPPPPPPPPPPPPPPPPPPPPPX	0.000794125	98.443	98.443	_HPFDGRPAS(ph)AAPALEVSQS(ph)PTSR_	HPFDGRPAS(1)AAPALEVS(0.319)QS(0.625)PT(0.028)S(0.028)R
gi|472582939	RHTO_02549	386	Rho guanyl-nucleotide exchange factor	1;2	S	DGRPASAAPALEVSQSPTSRDTASLPDQGSS;DGRPASAAPALEVSQSPTSRDTAVLPNQEPS	X;X;X;X;X;Phospho (STY);X;X;X;X;X;X;X;X;X;Phospho (STY);X;X;X;X;X;X;X;X;X;X;X;X;X;X;Phospho (STY)	PPPPPPPPPPPPPPPPPPPPXXXXXXXXXXX	3.6e-08	120.71	120.71	_HPFDGRPASAAPALEVSQS(ph)PTSR_	HPFDGRPASAAPALEVS(0.005)QS(0.843)PT(0.147)S(0.005)R
gi|472582939	RHTO_02549	352	Rho guanyl-nucleotide exchange factor	1	S	APQPKTLSELAEECASPGRSSSRSLDRVDYR;APQPKTLSELAEECASPGRSSSRSSDRVEYR	X;X;X;X;X;X;X;X;X;X;X;X;X;X;X;Phospho (STY);X;X;X;X;X;X;X;X;X;X;X;X;X;X;X	XXXXXPPPPPPPPPPPPPPXXXXXXXXXXXX	0.0130653	91.914	91.914	_TLSELAEECAS(ph)PGR_	TLSELAEECAS(1)PGR
gi|472582927	RHTO_02537	570	nonselective cation channel	1	S	LSLPILLIIALYERQSAGGSYFLDWWGDVKV	X;X;X;X;X;X;X;X;X;X;X;X;X;X;X;Phospho (STY);X;X;X;X;X;X;X;X;X;X;X;X;X;X;X	XXXXXXXXXXXXXXPPPPPPPPPPPPPPPPX	0.00389673	89.468	89.468	_QS(ph)AGGSYFLDWWGDVK_	QS(0.989)AGGS(0.011)YFLDWWGDVK
gi|472582927	RHTO_02537	829	nonselective cation channel	1;3	S	RLPANATGTRHRRRRSSVASDYGAISRIDLS;RLPANATGTRHRRRRSSVASDYGAISRLDLS	X;X;X;X;X;X;X;X;X;X;X;X;X;X;X;Phospho (STY);Phospho (STY);X;X;Phospho (STY);X;Phospho (STY);X;X;X;X;X;X;X;X;X	XXXXXXXXXXXXXPPPPPPPPPPPPPPXXXX	1.2e-05	133.16	133.16	_RRS(ph)S(ph)VAS(ph)DYGAISR_	RRS(1)S(1)VAS(1)DYGAISR
gi|472582927	RHTO_02537	830	nonselective cation channel	2;3	S	LPANATGTRHRRRRSSVASDYGAISRIDLSS;LPANATGTRHRRRRSSVASDYGAISRLDLSS	X;X;X;X;X;X;X;X;X;X;X;X;X;X;Phospho (STY);Phospho (STY);X;X;Phospho (STY);X;X;X;X;X;X;X;X;X;X;X;Phospho (STY)	XXXXXXXXXXXXPPPPPPPPPPPPPPXXXXX	4.67e-22	197	133.16	_RRS(ph)S(ph)VAS(ph)DYGAISR_	RRS(1)S(1)VAS(1)DYGAISR
gi|472582927	RHTO_02537	833	nonselective cation channel	1;2;3	S	NATGTRHRRRRSSVASDYGAISRIDLSSSAP;NATGTRHRRRRSSVASDYGAISRLDLSSSAP	X;X;X;X;X;X;X;X;X;X;X;Phospho (STY);Phospho (STY);X;X;Phospho (STY);X;Phospho (STY);X;X;X;X;X;X;X;X;X;Phospho (STY);Phospho (STY);X;X	XXXXXXXXXPPPPPPPPPPPPPPXXXXXXXX	4.67e-22	197	197	_RSS(ph)VAS(ph)DYGAISR_	RS(0.042)S(0.958)VAS(1)DYGAISR
gi|472582926	RHTO_02536	257	saccharopine dehydrogenase / Homospermidine synthase family protein	1	S	PVNTAVVHRSWGVLESADPSSRVLAYGPRFH	X;X;X;X;X;X;X;X;X;X;X;X;X;X;X;Phospho (STY);X;X;X;X;X;X;X;X;X;X;X;X;X;X;X	XXXXXXXXXPPPPPPPPPPPPPXXXXXXXXX	8.63e-05	95.854	95.854	_SWGVLES(ph)ADPSSR_	SWGVLES(1)ADPSSR
gi|472582927	RHTO_02537	10	nonselective cation channel	1	S	______MATERTALLSPDSTVRGPSHAEPQS;QFKLVAMATERTALLSPDSTVRGASHAEPHS	X;X;X;X;X;X;X;X;X;X;X;X;X;X;X;Phospho (STY);X;X;X;X;X;X;X;X;X;X;X;X;X;X;X	XXXXXXXXXXXPPPPPPPPPPPXXXXXXXXX	0.0002566	146.96	146.96	_TALLS(ph)PDSTVR_	TALLS(1)PDSTVR
gi|472582915	RHTO_02525	206	WD repeat protein	1	S	HQDRWQIDEDALKRLSSPPKARFHQCIQSHT;HQDRWQIDEDGLKRLSSPPKARFHQCIQSHT	X;X;X;X;X;X;X;X;X;X;X;X;X;X;X;Phospho (STY);X;X;X;X;X;X;X;X;X;X;X;X;X;X;X	XXXXXXXXXXXXXPPPPPPPXXXXXXXXXXX	0.0111644	99.568	99.568	_RLS(ph)SPPK_	RLS(0.835)S(0.165)PPK
gi|472582911	RHTO_02521	823	cell polarity protein	1	S	KHALEAIGISGNKRNSVDTLASEAKGKERES	X;X;X;X;X;X;X;X;X;X;X;X;X;X;X;Phospho (STY);X;X;X;X;X;X;X;X;X;X;X;X;X;X;X	XXXXXXXXXXXXXPPPPPPPPPPPPXXXXXX	1e-15	176.49	176.49	_RNS(ph)VDTLASEAK_	RNS(1)VDTLASEAK
gi|472586960	RHTO_04638	1207	AAA family ATPase	1	S	EKDAPRKGRRRGRGGSLPPEDGAVAAAETAA	X;X;X;X;X;X;X;X;X;X;X;X;X;X;X;Phospho (STY);X;X;X;X;X;X;X;X;X;X;X;X;X;X;X	XXXXXXXXXXXPPPPPPPPPPPPPPPPPPPP	1.44e-47	171.79	132.53	_GGS(ph)LPPEDGAVAAAETAAAAGGAFK_	GGS(1)LPPEDGAVAAAETAAAAGGAFK
gi|472586981	RHTO_04659	229	Pal1 cell morphology family protein	1	S	RTPPPPSASSMRRKVSNGLSERAQATLAAMD	X;X;X;X;X;X;X;X;X;X;X;X;X;X;X;Phospho (STY);X;X;X;X;X;X;X;X;X;X;X;X;X;X;X	XXXXXXXXXXXXXPPPPPPPPPXXXXXXXXX	0.00699142	92.856	83.617	_KVS(ph)NGLSER_	KVS(1)NGLSER
gi|472586981	RHTO_04659	82	Pal1 cell morphology family protein	1	S	VRSGTVDDILGAYGDSPTKARQPPLPERLDS;VRSGTVDDILGAYGDSPTKARQPSFPERFDS	X;X;X;X;X;X;X;X;X;X;X;X;X;X;X;Phospho (STY);X;X;X;X;X;X;X;X;X;X;X;X;X;X;X	XXPPPPPPPPPPPPPPPPPPPXXXXXXXXXX	2.89e-30	198.98	198.98	_SGTVDDILGAYGDS(ph)PTK_	SGTVDDILGAYGDS(0.801)PT(0.199)K
gi|472586981	RHTO_04659	155	Pal1 cell morphology family protein	1	S	RSARNRPGGPQTRSRSNTDLDLIDRLDISGL;RSARSRPGGPQTRSRSNTDLDLIDRLDISGL	X;X;X;X;X;X;X;X;X;X;X;X;X;X;X;Phospho (STY);X;X;X;X;X;X;X;X;X;X;X;X;X;X;X	XXXXXXXXXXXXXPPPPPPPPPPPPXXXXXX	2.06e-05	162.46	162.46	_SRS(ph)NTDLDLIDR_	S(0.009)RS(0.991)NTDLDLIDR
gi|472587196	RHTO_04875	663	FAD binding domain protein	1	S	RSVSWTKLAAQKRARSAGEGNFFEGLSEAEA;TSFSWTKFAAQKRARSAGEGNFFEGLSEAEA	X;X;X;Phospho (STY);X;X;X;X;X;X;X;X;X;X;X;Phospho (STY);X;X;X;X;X;X;X;X;X;X;X;X;X;X;X	XXXXXXXXXXXXXPPPPPPPPPPPPPPPPPP	1.73e-05	134.47	134.47	_ARS(ph)AGEGNFFEGLSEAEA_	ARS(1)AGEGNFFEGLSEAEA
gi|472587230	RHTO_04909	556	conserved hypothetical protein	2	S	ASSTSSPAATPSTATSPTQLHAPSSPPDARA	X;X;X;X;X;X;X;X;X;X;X;X;X;X;Phospho (STY);Phospho (STY);X;X;X;X;X;X;X;X;X;X;X;X;X;X;X	PPPPPPPPPPPPPPPPPPPPPPPPPPPPPPX	0.000266727	71.299	71.299	_IRPLSLSASSTSSPAATPSTAT(ph)S(ph)PTQLHAPSSPPDAR_	IRPLSLSASSTSSPAAT(0.001)PS(0.097)T(0.097)AT(0.55)S(0.55)PT(0.286)QLHAPS(0.209)S(0.209)PPDAR
gi|472587230	RHTO_04909	472	conserved hypothetical protein		S	RTSSRGSVRSSPSVTSPRGSVTGKSVAGSPS	X;X;X;X;X;X;X;X;X;X;X;X;X;X;X;X;X;X;X;X;X;X;X;X;X;X;X;X;Phospho (STY);X;X	XXXXXXXXXXXXXXXXXXXXXXXXXXXXXXX	0.00219464	128.01	128.01	_SSPSVT(ph)SPR_	SSPS(0.003)VT(0.498)S(0.498)PR
gi|472587230	RHTO_04909	485	conserved hypothetical protein	1	S	VTSPRGSVTGKSVAGSPSPRKSRPGSLYIDS	X;Phospho (STY);X;X;X;X;X;X;X;X;X;X;X;X;X;Phospho (STY);X;X;X;X;X;X;X;X;X;X;X;X;X;X;X	XXXXXXXXXXXPPPPPPPPPXXXXXXXXXXX	0.00933046	103.43	86.911	_SVAGS(ph)PSPR_	SVAGS(0.966)PS(0.034)PR
gi|472587230	RHTO_04909	758	conserved hypothetical protein	1	S	DDGDRTGAPSSVSAISSPAHSRLSSLADAPA	X;X;X;X;X;X;X;X;X;X;X;X;X;X;X;Phospho (STY);X;X;X;X;X;X;X;X;X;X;X;X;X;X;X	XXXXXPPPPPPPPPPPPPPPPPXXXXXXXXX	0.00329768	99.413	99.413	_TGAPSSVSAIS(ph)SPAHSR_	TGAPSSVSAIS(0.834)S(0.166)PAHSR
gi|472587282	RHTO_04961	608	GAF domain containing protein	2	S	TSSVPASEIVAPRRPSALSLAVTTEDPISAL	Phospho (STY);Phospho (STY);Phospho (STY);X;X;X;X;X;X;X;X;X;X;X;X;Phospho (STY);X;X;Phospho (STY);X;X;X;X;X;X;X;X;X;X;X;X	XXXXXXXXXXXXXPPPPPPPPPPPPPPPPPP	4.4e-06	118.48	118.48	_RPS(ph)ALS(ph)LAVTTEDPISALPR_	RPS(1)ALS(0.999)LAVT(0.001)TEDPISALPR
gi|472587282	RHTO_04961	611	GAF domain containing protein	2	S	VPASEIVAPRRPSALSLAVTTEDPISALPRE	X;X;X;X;X;X;X;X;X;X;X;X;Phospho (STY);X;X;Phospho (STY);X;X;X;X;X;X;X;X;X;X;X;X;X;X;X	XXXXXXXXXXPPPPPPPPPPPPPPPPPPPPX	4.4e-06	118.48	118.48	_RPS(ph)ALS(ph)LAVTTEDPISALPR_	RPS(1)ALS(0.999)LAVT(0.001)TEDPISALPR
gi|472587307	RHTO_04986	39	protein phosphatase inhibitor 2	2	S	GILKNSRSSSSNVPTSSSPPTARTQAGQDGQ	X;X;X;X;X;X;X;X;X;X;X;X;X;X;X;Phospho (STY);X;Phospho (STY);X;X;X;X;X;X;X;X;X;X;X;X;X	XXXXXXXPPPPPPPPPPPPPPPPXXXXXXXX	0.00928606	97.57	97.57	_SSSSNVPTS(ph)SS(ph)PPTAR_	S(0.002)S(0.007)S(0.008)S(0.002)NVPT(0.197)S(0.638)S(0.286)S(0.818)PPT(0.043)AR
gi|472587307	RHTO_04986	40	protein phosphatase inhibitor 2		S	ILKNSRSSSSNVPTSSSPPTARTQAGQDGQH	X;X;X;X;X;X;X;Phospho (STY);X;X;X;X;X;X;X;Phospho (STY);X;X;X;X;X;X;X;X;X;X;X;X;X;X;X	XXXXXXPPPPPPPPPPPPPPPPXXXXXXXXX	0.00729029	94.958	93.909	_SSSSNVPTSS(ph)SPPTAR_	SSSSNVPT(0.027)S(0.027)S(0.473)S(0.473)PPTAR
gi|472587307	RHTO_04986	41	protein phosphatase inhibitor 2	1;2	S	LKNSRSSSSNVPTSSSPPTARTQAGQDGQHH	X;X;X;X;X;X;X;X;X;X;X;X;X;Phospho (STY);X;Phospho (STY);X;X;X;X;X;X;X;X;X;X;X;X;X;X;X	XXXXXPPPPPPPPPPPPPPPPXXXXXXXXXX	0.00729029	97.57	97.57	_SSSSNVPTS(ph)SS(ph)PPTAR_	S(0.002)S(0.007)S(0.008)S(0.002)NVPT(0.197)S(0.638)S(0.286)S(0.818)PPT(0.043)AR
gi|472584478	RHTO_01287	1157	calcium ion binding membrane protein		S	RFVPRLDPPPFASITSSPGRGGPPRATYSAW	X;X;X;X;X;X;X;X;X;X;X;X;X;X;X;Phospho (STY);X;X;X;X;X;X;X;X;X;X;X;X;X;X;X	XXXXXPPPPPPPPPPPPPPPXXXXXXXXXXX	0.00108069	106.6	59.227	_LDPPPFASITS(ph)SPGR_	LDPPPFASIT(0.068)S(0.466)S(0.466)PGR
gi|472584478	RHTO_01287	1158	calcium ion binding membrane protein		S	FVPRLDPPPFASITSSPGRGGPPRATYSAWI	X;X;X;X;X;X;X;X;X;X;X;X;X;X;X;X;X;X;X;X;X;X;X;X;X;X;X;X;X;X;X	XXXXXXXXXXXXXXXXXXXXXXXXXXXXXXX	0.00108069	106.6	59.227	_LDPPPFASITS(ph)SPGR_	LDPPPFASIT(0.068)S(0.466)S(0.466)PGR
gi|472584478	RHTO_01287	641	calcium ion binding membrane protein	1	S	QPKRFDVMGMLFRSESGGSILDSIRAGVTGK	X;X;X;X;X;X;X;X;X;X;X;X;X;X;X;Phospho (STY);X;X;X;X;X;X;X;X;X;X;X;X;X;X;X	XXXXXXXXXXXXXPPPPPPPPPPPPXXXXXX	0.000674652	110.38	105.46	_SES(ph)GGSILDSIR_	SES(0.999)GGS(0.001)ILDSIR
gi|472584441	RHTO_01250	2273	DNA repair protein rad8	2	S	STSKAPAASTSSKPKSKPSSPAQPAFKKARS	X;X;X;X;X;X;X;X;X;X;X;X;X;X;X;Phospho (STY);X;X;Phospho (STY);Phospho (STY);X;X;X;X;X;X;X;X;X;X;X	XXXXXXXXXXXXXXXPPPPPPPPPPPPPXXX	0.00422677	84.508	84.375	_S(ph)KPS(ph)SPAQPAFK_	S(1)KPS(0.857)S(0.143)PAQPAFK
gi|472584441	RHTO_01250	2276	DNA repair protein rad8	2	S	KAPAASTSSKPKSKPSSPAQPAFKKARSSFI	X;X;X;X;X;X;X;X;X;X;X;X;Phospho (STY);X;X;Phospho (STY);Phospho (STY);X;X;X;X;X;X;X;X;X;X;X;X;X;X	XXXXXXXXXXXXPPPPPPPPPPPPPXXXXXX	0.00422677	84.375	84.375	_S(ph)KPS(ph)SPAQPAFK_	S(1)KPS(0.857)S(0.143)PAQPAFK
gi|472584441	RHTO_01250	2277	DNA repair protein rad8	2	S	APAASTSSKPKSKPSSPAQPAFKKARSSFIG	X;X;X;X;X;X;X;X;X;X;X;Phospho (STY);X;X;Phospho (STY);Phospho (STY);X;X;X;X;X;X;X;X;X;X;X;X;X;X;X	XXXXXXXXXXXPPPPPPPPPPPPXXXXXXXX	0.00568012	84.508	80.361	_S(ph)KPSS(ph)PAQPAFK_	S(0.922)KPS(0.111)S(0.967)PAQPAFK
gi|472584441	RHTO_01250	2297	DNA repair protein rad8	1	S	AFKKARSSFIGVVIESPKRKQSTLGRFFGKK	X;X;X;X;X;X;X;X;X;X;X;X;X;X;X;Phospho (STY);X;X;X;X;X;X;X;X;X;X;X;X;X;X;X	XXXXXXPPPPPPPPPPPPXXXXXXXXXXXXX	8.34e-05	155.1	155.1	_SSFIGVVIES(ph)PK_	SSFIGVVIES(1)PK
gi|472584419	RHTO_01228	476	ubiquitin carboxyl-terminal hydrolase 36/42	1	S	GKRPRESVGAPVARDSPSAPKRPRPSTDSAG	X;X;X;X;X;X;X;X;X;X;X;X;X;X;X;Phospho (STY);X;X;X;X;X;X;X;X;X;X;X;X;X;X;X	XXXXXPPPPPPPPPPPPPPPPXXXXXXXXXX	1.15e-28	190.96	190.96	_ESVGAPVARDS(ph)PSAPK_	ESVGAPVARDS(0.999)PS(0.001)APK
gi|472584418	RHTO_01227	225	Rho guanyl-nucleotide exchange factor	2	S	LSRRSSTTSTRRARPSPTPSFRHSLRLPFLL	X;X;X;X;X;X;X;X;X;X;X;X;X;X;X;Phospho (STY);X;X;X;Phospho (STY);X;X;X;X;X;X;X;X;X;X;X	XXXXXXXXXXXXPPPPPPPPPPXXXXXXXXX	0.00320229	112.24	112.24	_ARPS(ph)PTPS(ph)FR_	ARPS(0.999)PT(0.036)PS(0.966)FR
gi|472584418	RHTO_01227	229	Rho guanyl-nucleotide exchange factor	2	S	SSTTSTRRARPSPTPSFRHSLRLPFLLPSIP	X;X;X;X;X;X;X;X;X;X;X;Phospho (STY);X;X;X;Phospho (STY);X;X;X;X;X;X;X;X;X;X;X;X;X;X;X	XXXXXXXXPPPPPPPPPPXXXXXXXXXXXXX	0.00320229	112.24	90.561	_ARPS(ph)PTPS(ph)FR_	ARPS(0.985)PT(0.021)PS(0.994)FR
gi|472584416	RHTO_01225	753	conserved hypothetical protein	1	S	FGIEGDSAPTSLRAPSSLGQQSMTNLRSSQP	X;X;X;X;X;X;X;X;X;X;X;X;X;X;X;Phospho (STY);X;X;X;X;X;X;Oxidation (M);X;X;X;X;X;X;X;X	XXXXXXXXXXXXXPPPPPPPPPPPPPPXXXX	0.00322308	89.629	67.416	_APS(ph)SLGQQSM(ox)TNLR_	APS(0.859)S(0.139)LGQQS(0.001)MT(0.001)NLR
gi|472584416	RHTO_01225	754	conserved hypothetical protein	1	S	GIEGDSAPTSLRAPSSLGQQSMTNLRSSQPA	X;X;X;X;X;X;X;X;X;X;X;X;X;X;X;Phospho (STY);X;X;X;X;X;Oxidation (M);X;X;X;X;X;X;X;X;X	XXXXXXXXXXXXPPPPPPPPPPPPPPXXXXX	4.09e-06	133.78	133.78	_APSS(ph)LGQQSM(ox)TNLR_	APS(0.005)S(0.995)LGQQSMTNLR
gi|472584416	RHTO_01225	1190	conserved hypothetical protein	1	S	VSKRPSLAPDGTRKASTTSTSSVATAKEATT	X;X;X;X;X;Phospho (STY);X;X;X;X;X;X;X;X;X;Phospho (STY);X;X;X;X;X;X;X;X;X;X;X;X;X;X;X	XXXXXXXXXXXXXPPPPPPPPPPPPPPXXXX	0.000274414	115.26	62.765	_KAS(ph)TTSTSSVATAK_	KAS(0.995)T(0.004)T(0.001)STSSVATAK
gi|472584416	RHTO_01225	1193	conserved hypothetical protein		S	RPSLAPDGTRKASTTSTSSVATAKEATTPLA	X;X;Phospho (STY);X;X;X;X;X;X;X;X;X;X;X;X;Phospho (STY);X;X;X;X;X;X;X;X;X;X;X;X;X;X;X	XXXXXXXXXXPPPPPPPPPPPPPPXXXXXXX	0.000925484	106.36	106.36	_KASTTS(ph)TSSVATAK_	KAS(0.003)T(0.127)T(0.127)S(0.209)T(0.209)S(0.134)S(0.188)VAT(0.002)AK
gi|472584416	RHTO_01225	933	conserved hypothetical protein	2;3	S	RAKRSTRLFGSFGTNSGSEKSPTAVESVRSR	X;X;X;X;X;X;X;X;X;X;X;X;X;X;X;Phospho (STY);X;Phospho (STY);X;X;Phospho (STY);X;X;X;X;X;X;X;X;Phospho (STY);X	XXXXXXXPPPPPPPPPPPPPPPPPPPPPPXX	1.81e-14	181.51	127.64	_LFGSFGTNS(ph)GS(ph)EKSPTAVESVR_	LFGSFGTNS(1)GS(0.999)EKS(0.001)PTAVESVR
gi|472584416	RHTO_01225	935	conserved hypothetical protein	2;3	S	KRSTRLFGSFGTNSGSEKSPTAVESVRSRPS	X;X;X;X;X;X;X;X;X;X;X;X;X;Phospho (STY);X;Phospho (STY);X;X;Phospho (STY);X;X;X;X;X;X;X;X;Phospho (STY);X;X;Phospho (STY)	XXXXXPPPPPPPPPPPPPPPPPPPPPPXXXX	2.34e-11	127.64	127.64	_LFGSFGTNS(ph)GS(ph)EKSPTAVESVR_	LFGSFGTNS(1)GS(0.999)EKS(0.001)PTAVESVR
gi|472584416	RHTO_01225	938	conserved hypothetical protein	1;2;3	S	TRLFGSFGTNSGSEKSPTAVESVRSRPSNST	X;X;X;X;X;X;X;X;Phospho (STY);X;Phospho (STY);X;Phospho (STY);X;X;Phospho (STY);X;X;X;X;X;X;X;X;Phospho (STY);X;X;Phospho (STY);X;Phospho (STY);X	XXPPPPPPPPPPPPPPPPPPPPPPXXXXXXX	0.000934676	106.57	106.57	_LFGSFGT(ph)NSGSEKS(ph)PTAVESVR_	LFGS(0.037)FGT(0.954)NS(0.007)GS(0.002)EKS(0.976)PT(0.024)AVESVR
gi|472584416	RHTO_01225	1180	conserved hypothetical protein	1	S	LMNGEDLYASVSKRPSLAPDGTRKASTTSTS;LMNGEDLYSSVSKRPSLAPDGTRKASTTSTS	X;X;X;X;X;X;X;X;X;X;X;X;X;X;X;Phospho (STY);X;X;X;X;X;X;X;X;X;Phospho (STY);X;X;Phospho (STY);X;X	XXXXXXXXXXXXXPPPPPPPPPPXXXXXXXX	0.0099864	93.348	93.348	_RPS(ph)LAPDGTR_	RPS(1)LAPDGTR
gi|472584416	RHTO_01225	947	conserved hypothetical protein	2	S	NSGSEKSPTAVESVRSRPSNSTLGGGRDAPT	X;Phospho (STY);X;Phospho (STY);X;X;Phospho (STY);X;X;X;X;X;X;X;X;Phospho (STY);X;X;Phospho (STY);X;Phospho (STY);X;X;X;X;X;X;X;X;X;X	XXXXXXPPPPPPPPPPPPPPPPPPPPPXXXX	0.00356531	83.54	83.54	_S(ph)RPS(ph)NSTLGGGR_	S(1)RPS(0.436)NS(0.282)T(0.282)LGGGR
gi|472584416	RHTO_01225	950	conserved hypothetical protein	1;2	S	SEKSPTAVESVRSRPSNSTLGGGRDAPTAMT	Phospho (STY);X;X;Phospho (STY);X;X;X;X;X;X;X;X;Phospho (STY);X;X;Phospho (STY);X;Phospho (STY);X;X;X;X;X;X;X;X;X;X;X;X;X	XXXPPPPPPPPPPPPPPPPPPPPPXXXXXXX	0.000391385	135.23	57.973	_SRPS(ph)NS(ph)TLGGGR_	SRPS(0.979)NS(0.783)T(0.238)LGGGR
gi|472584416	RHTO_01225	952	conserved hypothetical protein	1;2	S	KSPTAVESVRSRPSNSTLGGGRDAPTAMTVK	X;Phospho (STY);X;X;X;X;X;X;X;X;Phospho (STY);X;X;Phospho (STY);X;Phospho (STY);X;X;X;X;X;X;X;X;X;X;X;X;X;X;X	XPPPPPPPPPPPPPPPPPPPPPXXXXXXXXX	0.00190777	92.773	92.773	_SRPSNS(ph)TLGGGR_	SRPS(0.028)NS(0.785)T(0.187)LGGGR
gi|472584329	RHTO_01138	369	helicase SWR1	1	S	LADLPGMLKDDLPPLSPRSVKRRRLYAASDV	X;X;X;X;X;X;X;X;X;X;X;X;X;X;X;Phospho (STY);X;X;X;X;X;X;X;X;X;X;X;X;X;X;X	XXXXXXXXXPPPPPPPPPXXXXXXXXXXXXX	0.00787089	116.24	99.215	_DDLPPLS(ph)PR_	DDLPPLS(1)PR
gi|472581421	RHTO_05323	482	RNA polymerase I specific transcription initiation factor RRN3	2	S	DVFDKAFAAAPVPAESGSREATPTADDVLTA	X;X;X;X;X;X;X;X;X;X;X;X;X;X;X;Phospho (STY);X;Phospho (STY);X;X;X;Phospho (STY);X;X;X;X;X;X;X;X;X	XXXXXPPPPPPPPPPPPPPPPPPPPPPPPPP	1.41e-05	81.055	70.449	_AFAAAPVPAES(ph)GS(ph)REATPTADDVLTADVVERR_	AFAAAPVPAES(0.883)GS(0.647)REAT(0.235)PT(0.235)ADDVLTADVVERR
gi|472581421	RHTO_05323	484	RNA polymerase I specific transcription initiation factor RRN3	2	S	FDKAFAAAPVPAESGSREATPTADDVLTADV	X;X;X;X;X;X;X;X;X;X;X;X;X;Phospho (STY);X;Phospho (STY);X;X;X;Phospho (STY);X;X;X;X;X;X;X;X;X;X;X	XXXPPPPPPPPPPPPPPPPPPPPPPPPPPPP	7.02e-10	101.04	101.04	_AFAAAPVPAESGS(ph)REAT(ph)PTADDVLTADVVER_	AFAAAPVPAES(0.19)GS(0.81)REAT(0.945)PT(0.054)ADDVLT(0.001)ADVVER
gi|472581410	RHTO_05312	594	nucleolar GTP-binding protein	1;2	S	MDVDEDAQASKKRRTSSSGSIVAKGKRVPGS	X;X;X;X;X;X;X;X;X;X;X;X;X;X;X;Phospho (STY);X;X;X;Phospho (STY);X;X;X;X;X;X;X;X;X;X;X	XXXXXXXXXXXXXPPPPPPPPPPPXXXXXXX	1.64e-13	181.71	118.47	_RTS(ph)SSGS(ph)IVAK_	RT(0.088)S(0.911)S(0.031)S(0.196)GS(0.774)IVAK
gi|472581410	RHTO_05312	596	nucleolar GTP-binding protein	2	S	VDEDAQASKKRRTSSSGSIVAKGKRVPGSNR	X;X;X;X;X;X;X;X;X;X;X;X;Phospho (STY);X;X;Phospho (STY);X;X;X;X;X;X;X;X;X;X;X;X;X;X;X	XXXXXXXXXXXPPPPPPPPPPPXXXXXXXXX	0.00803405	84.842	84.842	_RT(ph)SSS(ph)GSIVAK_	RT(0.499)S(0.499)S(0.096)S(0.543)GS(0.364)IVAK
gi|472581410	RHTO_05312	598	nucleolar GTP-binding protein	2	S	EDAQASKKRRTSSSGSIVAKGKRVPGSNRQL	X;X;X;X;X;X;X;X;X;X;Phospho (STY);Phospho (STY);X;X;X;Phospho (STY);X;X;X;X;X;X;X;X;X;X;X;X;X;X;X	XXXXXXXXXPPPPPPPPPPPXXXXXXXXXXX	0.000287165	118.47	106.38	_RT(ph)SSSGS(ph)IVAK_	RT(0.5)S(0.5)S(0.007)S(0.164)GS(0.829)IVAK
gi|472581342	RHTO_05244	116	NADH dehydrogenase (ubiquinone) 1 alpha subcomplex 8	1	S	NCVFEKLKLKKDIPGSPEGKPQIHEKTWPIY	X;X;X;X;X;X;X;X;X;X;X;X;X;X;X;Phospho (STY);X;X;X;X;X;X;X;X;X;X;X;X;X;X;X	XXXXXXXXXXXPPPPPPPPPPPPPPPXXXXX	0.00546777	77.894	77.894	_DIPGS(ph)PEGKPQIHEK_	DIPGS(1)PEGKPQIHEK
gi|472581332	RHTO_05234	306	Rhomboid family protein	1	S	YPPPTPNSYPLSKIPSLDVAPATDRGANGEQ	X;X;X;X;X;X;X;X;X;X;X;X;X;X;X;Phospho (STY);X;X;X;X;X;X;X;X;X;X;X;X;X;X;X	XXXXXXXXXXXXXPPPPPPPPPPPPXXXXXX	0.000508077	112.02	112.02	_IPS(ph)LDVAPATDR_	IPS(1)LDVAPATDR
gi|472588315	RHTO_00215	265	gram domain protein	1;3	S	ASSPPSSSRPQSRAASRPLSRSSSINSQQQP;TSSPPSSSRPQSRAASRPLSRSSSINSQQQP	X;X;Phospho (STY);X;X;X;Phospho (STY);X;X;X;X;X;X;X;X;Phospho (STY);X;X;X;Phospho (STY);X;X;Phospho (STY);Phospho (STY);X;X;X;X;X;X;X	XXXXXXXXXXXXXPPPPPPPPPPPPPPPPPP	0.0113192	79.201	79.201	_AAS(ph)RPLSR_	AAS(0.997)RPLS(0.003)R
gi|472588315	RHTO_00215	269	gram domain protein	1;3	S	PSSSRPQSRAASRPLSRSSSINSQQQPDNLS	X;X;Phospho (STY);X;X;X;X;X;X;X;X;Phospho (STY);X;X;X;Phospho (STY);X;X;Phospho (STY);Phospho (STY);X;X;X;X;X;X;X;X;X;X;X	XXXXXXXXXPPPPPPPPPPPPPPPPPPPPPP	0.00936651	89.171	89.171	_AASRPLS(ph)R_	AASRPLS(1)R
gi|472588315	RHTO_00215	272	gram domain protein	3	S	SRPQSRAASRPLSRSSSINSQQQPDNLSLRP	X;X;X;X;X;X;X;X;Phospho (STY);X;X;X;Phospho (STY);X;X;Phospho (STY);X;X;X;X;X;X;X;X;X;X;X;X;X;X;X	XXXXXXPPPPPPPPPPPPPPPPPPPPPPPPP	3.27e-05	89.028	59.189	_AAS(ph)RPLS(ph)RSS(ph)SINSQQQPDNLSLRPPGSVSPAR_	AAS(0.889)RPLS(0.551)RS(0.551)S(0.505)S(0.505)INS(0.001)QQQPDNLSLRPPGSVSPAR
gi|472588315	RHTO_00215	273	gram domain protein	1;3	S	RPQSRAASRPLSRSSSINSQQQPDNLSLRPP	X;X;X;X;X;X;X;Phospho (STY);X;X;X;Phospho (STY);X;X;X;Phospho (STY);X;X;X;X;X;X;X;X;X;X;X;X;X;X;X	XXXXXXXXXXXXXPPPPPPPPPPPPPPPPPP	3.27e-05	89.028	86.604	_SSS(ph)INSQQQPDNLSLRPPGSVSPAR_	S(0.042)S(0.176)S(0.774)INS(0.008)QQQPDNLSLRPPGSVSPAR
gi|472588315	RHTO_00215	290	gram domain protein	1	S	NSQQQPDNLSLRPPGSVSPARGRKGTMSKNG;NSQQQPDNLSLRPPGSVSPARGRKGTVSKNG	X;X;X;X;X;X;X;X;X;X;X;X;X;X;X;Phospho (STY);X;X;X;X;X;X;X;X;X;X;X;X;X;X;X	PPPPPPPPPPPPPPPPPPPPPXXXXXXXXXX	1.4e-10	130.05	130.05	_SSSINSQQQPDNLSLRPPGS(ph)VSPAR_	SSSINSQQQPDNLSLRPPGS(0.615)VS(0.385)PAR
gi|472588315	RHTO_00215	292	gram domain protein	1	S	QQQPDNLSLRPPGSVSPARGRKGTMSKNGIA;QQQPDNLSLRPPGSVSPARGRKGTVSKNGIA	X;X;X;X;X;X;X;X;X;X;X;X;X;X;X;X;X;X;X;X;X;X;X;X;X;X;X;X;X;X;X	XXXXXXXXXXXXXXXXXXXXXXXXXXXXXXX	5.35e-08	110.38	110.38	_SSSINSQQQPDNLSLRPPGS(ph)VSPAR_	SSSINSQQQPDNLSLRPPGS(0.5)VS(0.5)PAR
gi|472588315	RHTO_00215	241	gram domain protein	1	S	LDALAKINNSTLSPHSESPTKQLRASSPPSS;LDALAKINNSTLSPHSESPTKQLRTSSPPSS	X;X;X;X;X;X;X;X;X;X;X;X;X;X;X;Phospho (STY);X;X;X;X;X;X;X;X;X;X;Phospho (STY);X;X;X;Phospho (STY)	XXXXXXPPPPPPPPPPPPPPPXXXXXXXXXX	0.00467088	81.317	81.317	_INNSTLSPHS(ph)ESPTK_	INNSTLSPHS(0.552)ES(0.404)PT(0.044)K
gi|472588280	RHTO_00180	200	protein polybromo-1	1	S	KDDEETGRAGSVGPNSDPTYGEGSSRRSGRK	X;X;X;X;X;X;X;X;X;X;X;X;X;X;X;Phospho (STY);X;X;X;X;X;X;X;X;X;X;X;X;X;X;X	XXXXXXXXPPPPPPPPPPPPPPPPPPPXXXX	0.0030395	74.029	74.029	_AGSVGPNS(ph)DPTYGEGSSRR_	AGSVGPNS(0.98)DPT(0.017)Y(0.003)GEGSSRR
gi|472588280	RHTO_00180	414	protein polybromo-1	1	S	PDEDEEMDDDESRQGSVAPVGIVDPLRPKVE;QDEDEEMDDDESRQGSVAPVGIVDPLRPKVE	X;X;X;X;X;X;X;X;X;X;X;X;X;X;X;Phospho (STY);X;X;X;X;X;X;X;X;X;X;X;X;X;X;X	XXXXXXXXXXXXXPPPPPPPPPPPPPPPPXX	0.000188229	130.01	69.747	_QGS(ph)VAPVGIVDPLRPK_	QGS(1)VAPVGIVDPLRPK
gi|472588273	RHTO_00173	337	zinc finger, ZZ-type protein	1	S	AAVESTRGAAARPEASIVEEKKPAKHPANCD	X;X;X;X;X;X;X;X;X;X;X;X;X;X;X;Phospho (STY);X;X;X;X;X;X;X;X;X;X;X;X;X;X;X	XXXXXXXPPPPPPPPPPPPPPXXXXXXXXXX	2.91e-06	145.91	145.91	_GAAARPEAS(ph)IVEEK_	GAAARPEAS(1)IVEEK
gi|472588273	RHTO_00173	828	zinc finger, ZZ-type protein	1	S	PSHLAPSSRSGLDDGSDFESVRPTRTVSRAG	X;X;X;X;X;X;X;X;X;X;X;X;X;X;X;Phospho (STY);X;X;X;X;X;X;X;X;X;X;X;X;X;X;X	XXXXXXXXXPPPPPPPPPPPPPPPPXXXXXX	1.81e-74	161.99	152.89	_SGLDDGS(ph)DFESVRPTR_	SGLDDGS(1)DFESVRPTR
gi|472588233	RHTO_00133	702	chitin synthase, glycosyltransferase family 2 protein	1	S	PSLSKKGMIGAGMRNSPPGSPGGPRASRSST	X;X;X;X;X;X;X;X;X;X;X;X;X;X;X;Phospho (STY);X;X;X;X;X;X;X;X;X;X;X;X;X;X;X	XXXXXXXXXXXXXXPPPPPPPPPPPXXXXXX	0.012277	74.987	74.987	_NS(ph)PPGSPGGPR_	NS(1)PPGSPGGPR
gi|472588208	RHTO_00108	392	mitochondrial outer membrane protein, MIM1/TOM13	1	S	VEQVKTERISGAVQESPVADISWREKQGWWN;VEQVKTERISGAVQESPVADISWRERQGWWN	X;X;X;X;X;X;X;X;X;X;X;X;X;X;X;Phospho (STY);X;X;X;X;X;X;X;X;X;X;X;X;X;X;X	XXXXXXXXPPPPPPPPPPPPPPPPXXXXXXX	0.0103315	86.727	84.249	_ISGAVQES(ph)PVADISWR_	IS(0.005)GAVQES(0.995)PVADISWR
gi|472588208	RHTO_00108	305	mitochondrial outer membrane protein, MIM1/TOM13		S	FSQADAEGADVVAGTSASEQSAKPSDAKAAA	X;X;X;X;X;X;X;X;X;X;X;X;X;X;X;X;X;X;X;X;X;X;X;X;X;X;X;X;X;X;X	XXXXXXXXXXXXXXXXXXXXXXXXXXXXXXX	5.38e-07	86.946	86.946	_SFSQADAEGADVVAGT(ph)SASEQSAKPSDAK_	SFSQADAEGADVVAGT(0.246)S(0.246)AS(0.246)EQS(0.246)AKPS(0.015)DAK
gi|472588208	RHTO_00108	307	mitochondrial outer membrane protein, MIM1/TOM13		S	QADAEGADVVAGTSASEQSAKPSDAKAAALK	X;X;X;X;X;X;X;X;X;X;X;X;X;X;X;Phospho (STY);X;X;X;X;X;X;X;X;X;X;X;X;X;X;X	PPPPPPPPPPPPPPPPPPPPPPPPPPXXXXX	5.38e-07	86.946	56.947	_SFSQADAEGADVVAGTSAS(ph)EQSAKPSDAK_	SFSQADAEGADVVAGT(0.145)S(0.145)AS(0.268)EQS(0.268)AKPS(0.174)DAK
gi|472588208	RHTO_00108	310	mitochondrial outer membrane protein, MIM1/TOM13	1	S	AEGADVVAGTSASEQSAKPSDAKAAALKTAS	X;X;X;X;X;X;X;X;X;X;X;X;X;X;X;Phospho (STY);X;X;X;X;X;X;X;X;X;X;X;X;X;X;X	PPPPPPPPPPPPPPPPPPPPPPPXXXXXXXX	5.38e-07	86.946	78.098	_SFSQADAEGADVVAGTSASEQS(ph)AKPSDAK_	SFSQADAEGADVVAGT(0.043)S(0.043)AS(0.158)EQS(0.599)AKPS(0.158)DAK
gi|472588197	RHTO_00097	67	cell division control protein Cdc16	1	S	RQSNLSTLSLSPRRPSLAPSGSTATTRAPRR	X;X;X;X;X;X;X;X;X;X;X;X;X;X;X;Phospho (STY);X;X;X;X;X;X;X;X;X;X;X;X;X;X;X	XXXXXXXXXXXXXPPPPPPPPPPPPPPXXXX	0.0071465	98.165	98.165	_RPS(ph)LAPSGSTATTR_	RPS(1)LAPSGSTATTR
gi|472588176	RHTO_00076	284	actin binding protein	1	S	FAKYEGEHSVTGRKYSVDVGYERFLAPEIFF	X;X;X;X;X;X;X;X;X;X;X;X;X;X;X;Phospho (STY);X;X;X;X;X;X;X;X;X;X;X;X;X;X;X	XXXXXXXXXXXXXPPPPPPPPPPXXXXXXXX	0.00491155	85.837	85.837	_KYS(ph)VDVGYER_	KYS(1)VDVGYER
gi|472588130	RHTO_00030	783	tuberin	1	S	LRQWILSDDDETTASSPVHERAPLRPQDLDS	X;X;X;X;X;X;X;X;X;X;X;X;X;X;X;Phospho (STY);X;X;X;X;X;X;X;X;X;X;X;X;X;X;X	XXPPPPPPPPPPPPPPPPPPPXXXXXXXXXX	5.57e-19	164.93	164.93	_QWILSDDDETTASS(ph)PVHER_	QWILSDDDETTAS(0.174)S(0.826)PVHER
gi|472580342	RHTO_06646	172	cysteine protease, autophagy-related protein 4, ATG4		S	AAGPPESPTKTRKTRSRSIGSLNLLTRSVNR;ATGPPESPTKTRKTRSRSIGSLNLLTRSVNR	X;X;X;X;X;X;X;X;X;X;X;X;X;X;X;Phospho (STY);X;X;X;X;X;X;X;X;X;X;X;X;X;X;X	XXXXXXXXXXXXXXXPPPPPPPPPPPPXXXX	0.000205242	99.752	99.752	_S(ph)RSIGSLNLLTR_	S(0.333)RS(0.333)IGS(0.333)LNLLTR
gi|472580342	RHTO_06646	174	cysteine protease, autophagy-related protein 4, ATG4	2	S	GPPESPTKTRKTRSRSIGSLNLLTRSVNRPP	X;X;X;X;X;X;X;X;X;X;X;X;X;X;X;Phospho (STY);X;X;Phospho (STY);X;X;X;X;X;X;X;X;X;X;X;X	XXXXXXXXXXXXXPPPPPPPPPPPPXXXXXX	0.000205242	110.44	110.44	_SRS(ph)IGS(ph)LNLLTR_	S(0.004)RS(0.996)IGS(1)LNLLTR
gi|472580342	RHTO_06646	177	cysteine protease, autophagy-related protein 4, ATG4	2	S	ESPTKTRKTRSRSIGSLNLLTRSVNRPPEPE	X;X;X;X;X;X;X;X;X;X;X;X;Phospho (STY);X;X;Phospho (STY);X;X;X;X;X;X;X;X;X;X;X;X;X;X;X	XXXXXXXXXXPPPPPPPPPPPPXXXXXXXXX	0.000205242	110.44	110.44	_SRS(ph)IGS(ph)LNLLTR_	S(0.004)RS(0.996)IGS(1)LNLLTR
gi|472580331	RHTO_06635	341	dolichol-phosphate mannosyltransferase, glycosyltransferase family 2 protein	1	S	FPLGGYHPDAGVPPLSPKAKGRSSAARGLTG	X;X;X;X;X;X;X;X;X;X;X;X;X;X;X;Phospho (STY);X;X;X;X;X;X;X;X;X;X;X;X;X;X;X	PPPPPPPPPPPPPPPPPPXXXXXXXXXXXXX	0.00339595	77.222	64.152	_GREFPLGGYHPDAGVPPLS(ph)PK_	GREFPLGGYHPDAGVPPLS(1)PK
gi|472580326	RHTO_06630	477	clathrin-coated vesicle protein (partial sequence c terminus)	1;2	S	KEGFGPLAIATDDEGSEKAPSIKDGVEGNAV	X;X;X;X;X;X;X;X;X;X;Phospho (STY);X;X;X;X;Phospho (STY);X;X;X;X;X;X;X;X;X;X;X;X;X;X;X	XPPPPPPPPPPPPPPPPPPPPPPXXXXXXXX	6.55e-08	129.43	109.87	_EGFGPLAIAT(ph)DDEGS(ph)EKAPSIK_	EGFGPLAIAT(1)DDEGS(1)EKAPSIK
gi|472581652	RHTO_04376	588	GPCR, family 3, metabotropic glutamate receptor 5		S	PVIAHFANRELHSNTSVASSGDPDELLNFQV	X;X;X;X;X;X;X;X;X;X;X;X;X;X;X;Phospho (STY);X;X;Phospho (STY);X;X;X;X;X;X;X;X;X;X;X;X	XXXXXXXXXPPPPPPPPPPPPPPPPPPPPPP	0.00224621	56.783	56.783	_ELHSNTS(ph)VAS(ph)SGDPDELLNFQVTHVDKPTADFR_	ELHS(0.097)NT(0.243)S(0.489)VAS(0.592)S(0.579)GDPDELLNFQVTHVDKPTADFR
gi|472581652	RHTO_04376	591	GPCR, family 3, metabotropic glutamate receptor 5	2	S	AHFANRELHSNTSVASSGDPDELLNFQVTHV	X;X;X;X;X;X;X;X;X;X;X;X;Phospho (STY);X;X;Phospho (STY);X;X;X;X;X;X;X;X;X;X;X;X;X;X;X	XXXXXXPPPPPPPPPPPPPPPPPPPPPPPPP	0.00224621	56.783	56.783	_ELHSNTS(ph)VAS(ph)SGDPDELLNFQVTHVDKPTADFR_	ELHS(0.097)NT(0.243)S(0.489)VAS(0.592)S(0.579)GDPDELLNFQVTHVDKPTADFR
gi|472581652	RHTO_04376	592	GPCR, family 3, metabotropic glutamate receptor 5	2	S	HFANRELHSNTSVASSGDPDELLNFQVTHVD	X;X;X;X;X;X;X;X;X;X;X;X;X;X;X;X;X;X;X;X;X;X;X;X;X;X;X;X;X;X;X	XXXXXXXXXXXXXXXXXXXXXXXXXXXXXXX	0.00224621	56.783	56.783	_ELHSNTS(ph)VAS(ph)SGDPDELLNFQVTHVDKPTADFR_	ELHS(0.097)NT(0.243)S(0.489)VAS(0.592)S(0.579)GDPDELLNFQVTHVDKPTADFR
gi|472581664	RHTO_04388	137	transcription elongation factor SPT6	2	S	TDKPKGKLRRLRRARSASADDTSGAPRGLQD	X;X;X;X;X;X;X;X;X;X;X;X;X;X;X;Phospho (STY);X;Phospho (STY);X;X;X;X;X;X;X;X;X;X;X;X;X	XXXXXXXXXXXXXPPPPPPPPPPPPPPXXXX	0.00105954	117.84	76.704	_ARS(ph)AS(ph)ADDTSGAPR_	ARS(1)AS(0.966)ADDT(0.018)S(0.016)GAPR
gi|472581664	RHTO_04388	139	transcription elongation factor SPT6	2	S	KPKGKLRRLRRARSASADDTSGAPRGLQDIF	X;X;X;X;X;X;X;X;X;X;X;X;X;Phospho (STY);X;Phospho (STY);X;X;X;X;X;X;X;X;X;X;X;X;X;X;X	XXXXXXXXXXXPPPPPPPPPPPPPPXXXXXX	0.00105954	117.84	117.84	_ARS(ph)AS(ph)ADDTSGAPR_	ARS(1)AS(1)ADDTSGAPR
gi|472581676	RHTO_04400	397	hypothetical protein	3	S	DGVADEDASVRALPGSRRNSEESLGGRSTWS	X;X;X;X;X;X;X;X;X;X;X;X;X;X;X;Phospho (STY);X;X;X;Phospho (STY);X;X;Phospho (STY);X;X;X;X;X;X;X;Phospho (STY)	XXXXXXXXXXXPPPPPPPPPPPPPPPPXXXX	0.00641598	130.37	84.166	_ALPGS(ph)RRNS(ph)EES(ph)LGGR_	ALPGS(1)RRNS(1)EES(1)LGGR
gi|472581676	RHTO_04400	401	hypothetical protein	3	S	DEDASVRALPGSRRNSEESLGGRSTWSAAIG	X;X;X;X;X;X;X;X;X;X;X;Phospho (STY);X;X;X;Phospho (STY);X;X;Phospho (STY);X;X;X;X;X;X;X;Phospho (STY);X;X;X;X	XXXXXXXPPPPPPPPPPPPPPPPXXXXXXXX	0.00641598	130.37	84.166	_ALPGS(ph)RRNS(ph)EES(ph)LGGR_	ALPGS(1)RRNS(1)EES(1)LGGR
gi|472581676	RHTO_04400	404	hypothetical protein	3	S	ASVRALPGSRRNSEESLGGRSTWSAAIGAGR	X;X;X;X;X;X;X;X;Phospho (STY);X;X;X;Phospho (STY);X;X;Phospho (STY);X;X;X;X;X;X;X;Phospho (STY);X;X;X;X;X;X;X	XXXXPPPPPPPPPPPPPPPPXXXXXXXXXXX	0.00641598	130.37	84.166	_ALPGS(ph)RRNS(ph)EES(ph)LGGR_	ALPGS(1)RRNS(1)EES(1)LGGR
gi|472581676	RHTO_04400	148	hypothetical protein	3	S	STRPASSIISRHTVDSSSHNSSFAPSTHKSY	X;X;X;X;X;X;X;X;X;X;X;X;X;X;X;Phospho (STY);Phospho (STY);Phospho (STY);X;X;X;X;X;X;X;X;X;X;X;X;X	XXXXXXXXXXXPPPPPPPPPPPPPPPPPPXX	0.0073942	72.433	55.546	_HTVDS(ph)S(ph)S(ph)HNSSFAPSTHK_	HT(0.183)VDS(0.961)S(0.959)S(0.886)HNS(0.006)S(0.003)FAPS(0.001)T(0.001)HK
gi|472581676	RHTO_04400	149	hypothetical protein	3	S	TRPASSIISRHTVDSSSHNSSFAPSTHKSYA	X;X;X;X;X;X;X;X;X;X;X;X;X;X;Phospho (STY);Phospho (STY);Phospho (STY);X;X;X;X;X;X;X;X;X;X;X;X;X;X	XXXXXXXXXXPPPPPPPPPPPPPPPPPPXXX	0.0073942	72.433	55.546	_HTVDS(ph)S(ph)S(ph)HNSSFAPSTHK_	HT(0.183)VDS(0.961)S(0.959)S(0.886)HNS(0.006)S(0.003)FAPS(0.001)T(0.001)HK
gi|472581676	RHTO_04400	150	hypothetical protein	3	S	RPASSIISRHTVDSSSHNSSFAPSTHKSYAS	X;X;X;X;X;X;X;X;X;X;X;X;X;Phospho (STY);Phospho (STY);Phospho (STY);X;X;X;X;X;X;X;X;X;X;X;X;X;X;X	XXXXXXXXXPPPPPPPPPPPPPPPPPPXXXX	0.0073942	72.433	72.433	_HTVDS(ph)S(ph)S(ph)HNSSFAPSTHK_	HT(0.016)VDS(0.952)S(0.944)S(0.952)HNS(0.063)S(0.071)FAPS(0.001)THK
gi|472581676	RHTO_04400	412	hypothetical protein	1	S	SRRNSEESLGGRSTWSAAIGAGRGGTSVRSR	Phospho (STY);X;X;X;Phospho (STY);X;X;Phospho (STY);X;X;X;X;X;X;X;Phospho (STY);X;X;X;X;X;X;X;X;X;Phospho (STY);X;X;X;Phospho (STY);X	XXXXXXXXXXXXPPPPPPPPPPPXXXXXXXX	0.00396709	88.282	88.282	_STWS(ph)AAIGAGR_	ST(0.002)WS(0.998)AAIGAGR
gi|472581677	RHTO_04401	30	E3 ubiquitin-protein ligase BRE1	1	S	DPHQQRKRVTLVDPPSPHPSKKARLDSDAPA;DPHQQRKRVTLVDPPSPHPSKKARLDSDAPV	X;X;X;X;X;X;X;X;X;X;X;X;X;X;X;Phospho (STY);X;X;X;X;X;X;X;X;X;X;X;X;X;X;X	XXXXXXXXPPPPPPPPPPPPPPXXXXXXXXX	0.0032596	83.137	74.296	_VTLVDPPS(ph)PHPSKK_	VTLVDPPS(1)PHPSKK
gi|472581678	RHTO_04402	414	kinesin family member 5	1	S	LGEGELEKLVGGPAKSPTPGSAPGRTTPRPP	X;X;X;X;X;X;X;X;X;X;X;X;X;X;X;Phospho (STY);X;X;X;X;X;X;X;X;X;X;X;X;X;X;X	XXXXXXXXPPPPPPPPPPPPPPPPPXXXXXX	0.000950342	111.62	84.759	_LVGGPAKS(ph)PTPGSAPGR_	LVGGPAKS(0.996)PT(0.004)PGSAPGR
gi|472581678	RHTO_04402	419	kinesin family member 5	1	S	LEKLVGGPAKSPTPGSAPGRTTPRPPALDRV	X;X;X;X;X;X;X;X;X;X;X;X;X;X;X;Phospho (STY);X;X;X;X;X;X;X;X;X;X;X;X;X;X;X	XXXPPPPPPPPPPPPPPPPPXXXXXXXXXXX	9.04e-10	139.81	139.81	_LVGGPAKSPTPGS(ph)APGR_	LVGGPAKS(0.064)PT(0.116)PGS(0.82)APGR
gi|472581732	RHTO_04456	253	late endosome to vacuole transport-related protein	1	S	GNPPRRPPLAGGISASPSTSNLDNISRRSSY	X;X;X;X;X;X;X;X;X;X;X;X;X;X;X;Phospho (STY);X;X;X;X;X;X;X;X;X;X;X;X;X;X;X	XXXXXPPPPPPPPPPPPPPPPPPPPPPXXXX	0.00222618	83.251	83.251	_RPPLAGGISAS(ph)PSTSNLDNISR_	RPPLAGGIS(0.021)AS(0.959)PS(0.015)T(0.004)S(0.001)NLDNISR
gi|472581740	RHTO_04464	674	hypothetical protein	1	S	EEAQARGYAAGIASASPVSVAASRSSSSGSA	X;X;X;X;X;X;X;X;X;X;X;X;X;X;X;Phospho (STY);X;X;X;X;X;X;X;X;X;X;X;X;X;X;X	XXXXXXPPPPPPPPPPPPPPPPPPXXXXXXX	8.01e-08	132.65	86.748	_GYAAGIASAS(ph)PVSVAASR_	GYAAGIAS(0.014)AS(0.986)PVS(0.001)VAASR
gi|472581744	RHTO_04468	153	phosducin-like 2	1	S	RLQELQMQGSGERRGSDALGNRIFGHLREVG	X;X;X;X;X;X;X;X;X;X;X;X;X;X;X;Phospho (STY);X;X;X;X;X;X;X;X;X;X;X;X;X;X;X	XXXXXXXXXXXXXPPPPPPPPPXXXXXXXXX	0.00123493	132.59	132.59	_RGS(ph)DALGNR_	RGS(1)DALGNR
gi|472581745	RHTO_04470	261	exocyst complex component, exo70 subunit	1	S	PEMVSLTPKIGTDADSAKGAGASARGAADRR	X;X;X;X;X;X;X;X;X;X;X;X;X;X;X;Phospho (STY);X;X;X;X;X;X;X;X;X;X;X;X;X;X;X	XXXXXXXXXPPPPPPPPPPPPPPPPXXXXXX	2.6e-06	128.29	123	_IGTDADS(ph)AKGAGASAR_	IGTDADS(1)AKGAGASAR
gi|472586864	RHTO_06387	107	binuclear zinc transcription factor	2	S	EAKIAALERRLAEVSSPQGSPSPTATGLTTA	X;X;X;X;X;X;X;X;X;X;X;X;X;X;X;Phospho (STY);X;X;X;Phospho (STY);X;X;X;X;X;X;X;X;X;X;X	XXXXXXXXXPPPPPPPPPPPPPPPPPPPPPP	0.000136432	77.791	77.791	_RLAEVSS(ph)PQGS(ph)PSPTATGLTTASR_	RLAEVS(0.115)S(0.5)PQGS(0.916)PS(0.449)PT(0.015)AT(0.004)GLTTASR
gi|472586864	RHTO_06387	111	binuclear zinc transcription factor	2	S	AALERRLAEVSSPQGSPSPTATGLTTASRDS	X;X;X;X;X;X;X;X;X;X;X;Phospho (STY);X;X;X;Phospho (STY);X;Phospho (STY);X;X;X;X;X;X;X;X;X;X;X;X;X	XXXXXPPPPPPPPPPPPPPPPPPPPPPPPXX	1.98e-14	128.67	97.57	_RLAEVSSPQGS(ph)PS(ph)PTATGLTTASR_	RLAEVSS(0.001)PQGS(0.998)PS(0.981)PT(0.019)AT(0.001)GLTTASR
gi|472586864	RHTO_06387	113	binuclear zinc transcription factor	2	S	LERRLAEVSSPQGSPSPTATGLTTASRDSTP	X;X;X;X;X;X;X;X;X;X;X;X;X;Phospho (STY);X;Phospho (STY);X;X;X;X;X;X;X;X;X;X;X;X;X;X;X	XXXPPPPPPPPPPPPPPPPPPPPPPPPXXXX	1.98e-14	128.67	97.57	_RLAEVSSPQGS(ph)PS(ph)PTATGLTTASR_	RLAEVSS(0.001)PQGS(0.998)PS(0.981)PT(0.019)AT(0.001)GLTTASR
gi|472580220	RHTO_07391	240	serine/threonine protein kinase	1	S	YSKAPARSSAKRNVLSPPSGLDPYPRRRPQA	X;X;X;X;X;X;X;X;X;X;X;X;X;X;X;Phospho (STY);X;X;X;X;X;X;X;X;X;X;X;X;X;X;X	XXXXXXXXXXXXPPPPPPPPPPPPPPXXXXX	1.83e-06	149.95	138.05	_NVLS(ph)PPSGLDPYPR_	NVLS(1)PPSGLDPYPR
gi|472580220	RHTO_07391	243	serine/threonine protein kinase	1	S	APARSSAKRNVLSPPSGLDPYPRRRPQAASA	X;X;X;X;X;X;X;X;X;X;X;X;X;X;X;Phospho (STY);X;X;X;X;X;X;X;X;X;X;X;X;X;X;X	XXXXXXXXXPPPPPPPPPPPPPPXXXXXXXX	0.00193222	102.87	96.208	_NVLSPPS(ph)GLDPYPR_	NVLS(0.117)PPS(0.883)GLDPYPR
gi|472580229	RHTO_07388	92	transducin (beta)-like 1	1	S	SRKSKPAQNDAAQSASPSAPGPAPSKFRITM	X;X;X;X;X;X;X;X;X;X;X;X;X;X;X;Phospho (STY);X;X;X;X;X;X;X;X;X;X;X;X;X;X;X	XXXPPPPPPPPPPPPPPPPPPPPPPPXXXXX	0.000554759	97.49	97.49	_SKPAQNDAAQSAS(ph)PSAPGPAPSK_	SKPAQNDAAQS(0.022)AS(0.976)PS(0.002)APGPAPSK
gi|472580262	RHTO_07058	17	mitochondrial intermembrane space import and assembly protein	3	S	FRASLRAVPRSLPARSYRQQLRTATTSTAQR	X;X;X;X;X;X;X;X;X;X;X;X;X;X;X;Phospho (STY);Phospho (STY);X;X;X;X;X;X;X;Phospho (STY);X;X;X;X;X;X	XXXXXXXXXXXXXXXPPPPPPPPPPPPPPPP	0.0020012	100.67	100.67	_S(ph)Y(ph)RQQLRTAT(ph)TSTAQR_	S(1)Y(1)RQQLRTAT(0.369)T(0.306)S(0.177)T(0.148)AQR
gi|472580292	RHTO_06688	681	hypothetical protein	1;2;3	S	GYGSAVRGGGRSRAGSLTQPAQPYHGSSPLA	X;X;X;X;X;X;X;X;X;X;X;X;X;X;X;Phospho (STY);X;X;X;X;X;X;X;Phospho (STY);X;X;X;Phospho (STY);X;X;X	XXXXXXXXXXXXXPPPPPPPPPPPPPPPPPP	3.1e-08	94.352	94.352	_AGS(ph)LTQPAQPYHGSS(ph)PLATPSASPTTAHR_	AGS(0.937)LT(0.063)QPAQPY(0.205)HGS(0.193)S(0.602)PLATPSASPTTAHR
gi|472580292	RHTO_06688	692	hypothetical protein		S	SRAGSLTQPAQPYHGSSPLATPSASPTTAHR	X;X;X;X;X;X;X;X;X;X;X;X;X;X;X;Phospho (STY);X;X;X;X;X;X;Phospho (STY);X;X;X;X;X;X;X;X	XXPPPPPPPPPPPPPPPPPPPPPPPPPPPPP	2.34e-14	115.2	81.553	_AGSLTQPAQPYHGS(ph)SPLATPS(ph)ASPTTAHR_	AGSLTQPAQPY(0.004)HGS(0.48)S(0.48)PLAT(0.063)PS(0.454)AS(0.454)PT(0.033)T(0.033)AHR
gi|472580292	RHTO_06688	693	hypothetical protein	2	S	RAGSLTQPAQPYHGSSPLATPSASPTTAHRA	X;X;X;Phospho (STY);X;X;X;X;X;X;X;X;X;X;X;Phospho (STY);X;X;X;X;X;X;X;Phospho (STY);X;X;X;X;X;X;X	XPPPPPPPPPPPPPPPPPPPPPPPPPPPPPX	7.23e-15	119.54	119.54	_AGSLTQPAQPYHGSS(ph)PLATPSAS(ph)PTTAHR_	AGSLTQPAQPY(0.059)HGS(0.184)S(0.756)PLATPS(0.271)AS(0.672)PT(0.03)T(0.026)AHR
gi|472580292	RHTO_06688	699	hypothetical protein		S	QPAQPYHGSSPLATPSASPTTAHRATTPALA	X;X;X;X;X;X;X;X;Phospho (STY);X;X;X;X;X;X;Phospho (STY);X;X;X;X;X;X;X;X;X;X;X;X;X;X;X	PPPPPPPPPPPPPPPPPPPPPPPPXXXXXXX	2.34e-14	115.2	81.553	_AGSLTQPAQPYHGS(ph)SPLATPS(ph)ASPTTAHR_	AGSLTQPAQPY(0.004)HGS(0.48)S(0.48)PLAT(0.063)PS(0.454)AS(0.454)PT(0.033)T(0.033)AHR
gi|472580292	RHTO_06688	701	hypothetical protein	2	S	AQPYHGSSPLATPSASPTTAHRATTPALATG	X;X;X;Phospho (STY);X;X;X;Phospho (STY);X;X;X;X;X;X;X;Phospho (STY);X;X;X;X;X;X;X;X;X;X;X;X;X;X;X	PPPPPPPPPPPPPPPPPPPPPPXXXXXXXXX	7.23e-15	119.54	119.54	_AGSLTQPAQPYHGSS(ph)PLATPSAS(ph)PTTAHR_	AGSLTQPAQPY(0.059)HGS(0.184)S(0.756)PLATPS(0.271)AS(0.672)PT(0.03)T(0.026)AHR
gi|472580295	RHTO_06691	52	baculoviral IAP repeat-containing protein 6 (apollon)	2	S	EIHTAPSSRKGKRRASSPGLEVRDGRAKRVR	X;X;X;X;X;X;X;X;X;X;X;X;X;X;X;Phospho (STY);Phospho (STY);X;X;X;X;X;X;X;X;X;X;X;X;X;X	XXXXXXXXXXXXXPPPPPPPPPPXXXXXXXX	0.000729513	145.86	145.86	_RAS(ph)S(ph)PGLEVR_	RAS(1)S(1)PGLEVR
gi|472580295	RHTO_06691	53	baculoviral IAP repeat-containing protein 6 (apollon)	1;2	S	IHTAPSSRKGKRRASSPGLEVRDGRAKRVRS	X;X;X;X;X;X;X;X;X;X;X;X;X;X;Phospho (STY);Phospho (STY);X;X;X;X;X;X;X;X;X;X;X;X;X;X;X	XXXXXXXXXXXXPPPPPPPPPPXXXXXXXXX	4.69e-11	183.99	145.86	_RAS(ph)S(ph)PGLEVR_	RAS(1)S(1)PGLEVR
gi|472580295	RHTO_06691	115	baculoviral IAP repeat-containing protein 6 (apollon)	2	S	EEDQAALVAGEQAGPSTSPSASTSARRKSPR	X;X;X;X;X;X;X;X;X;X;X;X;X;X;X;Phospho (STY);X;X;X;X;X;Phospho (STY);X;X;X;X;X;X;X;X;X	PPPPPPPPPPPPPPPPPPPPPPPPPPXXXXX	0.00427878	54.605	54.605	_KLQDEEDQAALVAGEQAGPS(ph)TSPSAS(ph)TSAR_	KLQDEEDQAALVAGEQAGPS(0.64)T(0.226)S(0.226)PS(0.144)AS(0.255)T(0.255)S(0.255)AR
gi|472580295	RHTO_06691	117	baculoviral IAP repeat-containing protein 6 (apollon)	1	S	DQAALVAGEQAGPSTSPSASTSARRKSPRKP	X;X;X;X;X;X;X;X;X;X;X;X;X;X;X;Phospho (STY);X;X;X;X;X;X;X;X;X;X;X;X;X;X;X	PPPPPPPPPPPPPPPPPPPPPPPPXXXXXXX	3.76e-20	127.92	127.92	_KLQDEEDQAALVAGEQAGPSTS(ph)PSASTSAR_	KLQDEEDQAALVAGEQAGPST(0.019)S(0.932)PS(0.029)AS(0.006)T(0.006)S(0.006)AR
gi|472580295	RHTO_06691	121	baculoviral IAP repeat-containing protein 6 (apollon)		S	LVAGEQAGPSTSPSASTSARRKSPRKPSTSS	X;X;X;X;X;X;X;X;X;Phospho (STY);X;X;X;X;X;Phospho (STY);X;X;X;X;X;X;X;X;X;X;X;X;X;X;X	PPPPPPPPPPPPPPPPPPPPXXXXXXXXXXX	0.00427878	54.605	54.605	_KLQDEEDQAALVAGEQAGPS(ph)TSPSAS(ph)TSAR_	KLQDEEDQAALVAGEQAGPS(0.64)T(0.226)S(0.226)PS(0.144)AS(0.255)T(0.255)S(0.255)AR
gi|472580295	RHTO_06691	123	baculoviral IAP repeat-containing protein 6 (apollon)		S	AGEQAGPSTSPSASTSARRKSPRKPSTSSSS	X;X;X;X;X;X;X;X;X;X;X;X;X;X;X;X;X;X;X;X;X;X;X;X;X;X;X;X;X;X;X	XXXXXXXXXXXXXXXXXXXXXXXXXXXXXXX	0.00427878	54.605	54.605	_KLQDEEDQAALVAGEQAGPS(ph)TSPSAS(ph)TSAR_	KLQDEEDQAALVAGEQAGPS(0.64)T(0.226)S(0.226)PS(0.144)AS(0.255)T(0.255)S(0.255)AR
gi|472580302	RHTO_06698	12	K Homology domain containing protein	2	S	____MDRKRKWDEPQSQSPQPGAPAPPDHKA	X;X;X;X;X;X;X;X;X;X;X;X;X;X;X;Phospho (STY);X;Phospho (STY);X;X;X;X;X;X;X;X;X;X;X;X;X	XXXXXXXXPPPPPPPPPPPPPPPPPPPPPPX	6.83e-08	123.85	72.316	_WDEPQS(ph)QS(ph)PQPGAPAPPDHK_	WDEPQS(1)QS(1)PQPGAPAPPDHK
gi|472580302	RHTO_06698	14	K Homology domain containing protein	1;2	S	__MDRKRKWDEPQSQSPQPGAPAPPDHKAVK	X;X;X;X;X;X;X;X;X;X;X;X;X;Phospho (STY);X;Phospho (STY);X;X;X;X;X;X;X;X;X;X;X;X;X;X;X	XXXXXXPPPPPPPPPPPPPPPPPPPPPPXXX	6.83e-08	123.85	72.316	_WDEPQS(ph)QS(ph)PQPGAPAPPDHK_	WDEPQS(1)QS(1)PQPGAPAPPDHK
gi|472580306	RHTO_06664	524	vacuolar protein 8	1;2	S	AILPLVRRLAEAPQPSSEASDDEDAESGARE	X;X;X;X;X;X;X;X;X;X;X;X;X;X;X;Phospho (STY);X;X;X;Phospho (STY);X;X;X;X;X;X;X;X;X;X;X	XXXXXXXPPPPPPPPPPPPPPPPPPPPPPPX	1.26e-12	128.06	128.06	_RLAEAPQPS(ph)SEASDDEDAESGAR_	RLAEAPQPS(0.58)S(0.398)EAS(0.022)DDEDAESGAR
gi|472580306	RHTO_06664	525	vacuolar protein 8	2	S	ILPLVRRLAEAPQPSSEASDDEDAESGAREI	X;X;X;X;X;X;X;X;X;X;X;X;X;X;X;Phospho (STY);X;X;Phospho (STY);X;X;X;X;X;X;X;X;X;X;X;X	XXXXXXPPPPPPPPPPPPPPPPPPPPPPPXX	1.31e-32	165.3	163.62	_RLAEAPQPSS(ph)EAS(ph)DDEDAESGAR_	RLAEAPQPS(0.118)S(0.883)EAS(0.999)DDEDAESGAR
gi|472580306	RHTO_06664	528	vacuolar protein 8	1;2	S	LVRRLAEAPQPSSEASDDEDAESGAREIAEL	X;X;X;X;X;X;X;X;X;X;X;Phospho (STY);Phospho (STY);X;X;Phospho (STY);X;X;X;X;X;X;Phospho (STY);X;X;X;X;X;X;X;X	XXXPPPPPPPPPPPPPPPPPPPPPPPPPPPP	1.17e-103	240.18	240.18	_RLAEAPQPSSEAS(ph)DDEDAESGAR_	RLAEAPQPSSEAS(1)DDEDAESGAR
gi|472580306	RHTO_06664	535	vacuolar protein 8	1;2	S	APQPSSEASDDEDAESGAREIAELARSAVEL	X;X;X;X;X;X;X;X;Phospho (STY);X;X;X;X;X;X;Phospho (STY);X;X;X;X;X;X;X;X;X;X;X;X;X;X;X	PPPPPPPPPPPPPPPPPPPPPPPPPPXXXXX	1.12e-53	193.53	172.94	_RLAEAPQPSSEAS(ph)DDEDAES(ph)GAR_	RLAEAPQPSSEAS(1)DDEDAES(1)GAR
gi|472580307	RHTO_06665	588	cleavage and polyadenylation specificity factor subunit 1	1	S	SLPSFRKLAPSASSSSPSVTATDDLIRLEVC	X;X;X;X;X;X;X;X;X;X;X;X;X;X;X;Phospho (STY);X;X;X;X;X;X;X;X;X;X;X;X;X;X;X	XXXXXXPPPPPPPPPPPPPPPPPPPPPXXXX	0.00300702	85.51	85.51	_KLAPSASSSS(ph)PSVTATDDLIR_	KLAPS(0.001)AS(0.001)S(0.003)S(0.206)S(0.79)PSVTATDDLIR
gi|472580310	RHTO_06668	34	Ran-binding protein	1	S	SQPAHSVSGPNLLPVSPRRSHSSLPSIGSST	X;X;X;X;X;X;X;X;X;X;X;X;X;X;X;Phospho (STY);X;X;X;X;X;X;X;X;X;X;X;X;X;X;X	PPPPPPPPPPPPPPPPPPXXXXXXXXXXXXX	5.8e-36	179.33	179.33	_HSPSQPAHSVSGPNLLPVS(ph)PR_	HSPSQPAHSVSGPNLLPVS(1)PR
gi|472580319	RHTO_06677	1457	DNA topoisomerase II	2	S	SPKGKKATATKAKAKSVELDDSDDEPVVTKK	X;X;X;X;X;X;X;X;X;X;X;X;X;X;X;Phospho (STY);X;X;X;X;X;Phospho (STY);X;X;X;X;X;X;X;X;X	XXXXXXXXXXXPPPPPPPPPPPPPPPPPPPP	6.09e-05	116.65	116.65	_AKS(ph)VELDDS(ph)DDEPVVTKK_	AKS(1)VELDDS(1)DDEPVVTKK
gi|472580319	RHTO_06677	1463	DNA topoisomerase II	1;2	S	ATATKAKAKSVELDDSDDEPVVTKKKAPATA	X;X;X;X;X;X;X;X;X;Phospho (STY);X;X;X;X;X;Phospho (STY);X;X;X;X;X;X;X;X;X;X;X;X;X;X;X	XXXXXPPPPPPPPPPPPPPPPPPPPXXXXXX	1.84e-76	235.26	202.35	_SVELDDS(ph)DDEPVVTKK_	SVELDDS(1)DDEPVVTKK
gi|472580319	RHTO_06677	1418	DNA topoisomerase II	1	S	TTGKKAAASKKKVAASDIEDEDDELDDLYAL	X;X;X;X;X;X;X;X;X;X;X;X;X;X;X;Phospho (STY);X;X;X;X;X;X;X;X;X;X;X;X;X;X;X	XXXXXXXXXXPPPPPPPPPPPPPPPPPPPPP	2.03e-14	129.02	125.12	_VAAS(ph)DIEDEDDELDDLYALPAK_	VAAS(1)DIEDEDDELDDLYALPAK
gi|472580320	RHTO_06678	493	nucleotide-sugar transporter	1	S	PHRAGGHGFDSSADDSYEEGAPMLPTGEGRR	X;X;X;X;X;X;X;X;X;X;X;X;X;X;X;Phospho (STY);X;X;X;X;X;X;Oxidation (M);X;X;X;X;X;X;X;X	XXXPPPPPPPPPPPPPPPPPPPPPPPPPPPX	8.19e-06	98.112	98.112	_AGGHGFDSSADDS(ph)YEEGAPM(ox)LPTGEGR_	AGGHGFDS(0.012)S(0.012)ADDS(0.764)Y(0.213)EEGAPMLPTGEGR
gi|472580320	RHTO_06678	537	nucleotide-sugar transporter	1	S	SSPSAPHHSLGGADDSPRSSADLDAQAAELL	X;X;X;X;X;X;X;X;X;X;X;X;X;X;X;Phospho (STY);X;X;X;X;X;X;X;X;X;X;X;X;X;X;X	PPPPPPPPPPPPPPPPPPXXXXXXXXXXXXX	0.00909206	76.889	76.889	_LSDSSPSAPHHSLGGADDS(ph)PR_	LSDSSPSAPHHSLGGADDS(1)PR
gi|472580320	RHTO_06678	45	nucleotide-sugar transporter	2	S	AQLDRDIHDPHRRGDSPTTPAHGDARDSYEL	X;X;X;X;X;X;X;X;X;X;X;X;X;X;X;Phospho (STY);X;X;X;X;X;X;X;X;X;X;X;Phospho (STY);Phospho (STY);X;X	XXXXXXXXXXXXPPPPPPPPPPPPPPPPPPP	0.00472052	90.718	88.574	_RGDS(ph)PTTPAHGDARDS(ph)YELEQR_	RGDS(0.995)PT(0.006)T(0.006)PAHGDARDS(0.549)Y(0.445)ELEQR
gi|472580320	RHTO_06678	57	nucleotide-sugar transporter	2	S	RGDSPTTPAHGDARDSYELEQRYTDSKGAPG	X;X;X;Phospho (STY);X;X;X;X;X;X;X;X;X;X;X;Phospho (STY);X;X;X;X;X;X;X;X;X;X;X;X;X;X;X	PPPPPPPPPPPPPPPPPPPPPPXXXXXXXXX	0.00472052	88.574	88.574	_RGDS(ph)PTTPAHGDARDS(ph)YELEQR_	RGDS(0.995)PT(0.006)T(0.006)PAHGDARDS(0.549)Y(0.445)ELEQR
gi|472580320	RHTO_06678	118	nucleotide-sugar transporter	1	S	SASYARLETRARRTGSFSAARAGDGARRLRF	X;X;X;X;X;X;X;X;X;X;X;X;X;X;X;Phospho (STY);X;X;X;X;X;X;X;X;X;X;X;X;X;X;X	XXXXXXXXXXXXPPPPPPPPPXXXXXXXXXX	0.0054548	90.793	80.245	_RTGS(ph)FSAAR_	RT(0.172)GS(0.79)FS(0.038)AAR
gi|472580322	RHTO_06680	406	putative transposase	1	S	NGSTNSGSGATTRSNSSSAAPQTTSGGGGRP	X;X;X;X;X;X;X;X;X;X;X;X;X;X;X;Phospho (STY);X;X;X;X;X;X;X;X;X;X;X;X;X;X;X	XXXXXXXXXXXXXPPPPPPPPPPPPPPPPPP	0.00144495	84.375	84.375	_SNS(ph)SSAAPQTTSGGGGRPPK_	S(0.002)NS(0.948)S(0.042)S(0.008)AAPQT(0.001)TSGGGGRPPK
gi|472580338	RHTO_06642	210	peptidylprolyl isomerase	1;2;3	S	SKKRPADETPAGADDSTVSAASVAGLSKNQK	X;X;X;X;X;X;X;X;X;X;X;X;X;X;X;Phospho (STY);Phospho (STY);X;Phospho (STY);X;X;Phospho (STY);X;X;X;X;X;X;X;X;X	XXPPPPPPPPPPPPPPPPPPPPPPPPPPXXX	1.08e-43	174.15	141.1	_KRPADETPAGADDS(ph)T(ph)VS(ph)AASVAGLSK_	KRPADETPAGADDS(1)T(0.999)VS(0.993)AAS(0.008)VAGLSK
gi|472580338	RHTO_06642	213	peptidylprolyl isomerase	2;3	S	RPADETPAGADDSTVSAASVAGLSKNQKKKL	X;X;X;X;X;X;X;X;X;X;X;X;Phospho (STY);Phospho (STY);X;Phospho (STY);X;X;Phospho (STY);X;X;X;X;Phospho (STY);X;X;X;X;X;X;X	PPPPPPPPPPPPPPPPPPPPPPPPPXXXXXX	2.77e-55	183.8	132	_KRPADETPAGADDS(ph)T(ph)VS(ph)AASVAGLSK_	KRPADETPAGADDS(0.999)T(0.999)VS(0.998)AAS(0.003)VAGLSK
gi|472580338	RHTO_06642	216	peptidylprolyl isomerase	1;2;3	S	DETPAGADDSTVSAASVAGLSKNQKKKLAKK	X;X;X;X;X;X;X;X;X;Phospho (STY);Phospho (STY);X;Phospho (STY);X;X;Phospho (STY);X;X;X;X;X;X;X;X;X;X;X;X;X;X;X	PPPPPPPPPPPPPPPPPPPPPPXXXXXXXXX	2.77e-55	183.8	58.964	_KRPADETPAGADDSTVS(ph)AAS(ph)VAGLSK_	KRPADET(0.001)PAGADDS(0.031)T(0.031)VS(0.939)AAS(0.998)VAGLSK
gi|472580338	RHTO_06642	221	peptidylprolyl isomerase	2	S	GADDSTVSAASVAGLSKNQKKKLAKKQKAEN	X;X;X;X;X;X;X;Phospho (STY);X;X;X;X;X;X;X;Phospho (STY);X;X;X;X;X;X;X;X;X;X;X;X;X;X;X	PPPPPPPPPPPPPPPPPXXXXXXXXXXXXXX	0.000260603	80.061	80.061	_KRPADETPAGADDSTVS(ph)AASVAGLS(ph)K_	KRPADETPAGADDS(0.001)T(0.001)VS(0.958)AAS(0.251)VAGLS(0.789)K
gi|472580338	RHTO_06642	378	peptidylprolyl isomerase	1	S	PPNSRLTFDVKLLSLSPSSSSSSSSRR____	X;X;X;X;X;X;X;X;X;X;X;X;X;X;X;Phospho (STY);X;X;X;X;X;X;X;X;X;X;X;X;X;X;X	XXXXXXXXXXXPPPPPPPPPPPPPPPXXXXX	3.74e-07	152.32	76.586	_LLSLS(ph)PSSSSSSSSR_	LLS(0.001)LS(0.515)PS(0.111)S(0.111)S(0.111)S(0.111)S(0.025)S(0.006)S(0.007)S(0.001)R
gi|472580338	RHTO_06642	380	peptidylprolyl isomerase	1;2	S	NSRLTFDVKLLSLSPSSSSSSSSRR______	X;X;X;X;X;X;X;X;X;X;X;X;X;X;X;Phospho (STY);X;X;X;Phospho (STY);X;X;Phospho (STY);X;X;X;X;X;X;X;X	XXXXXXXXXPPPPPPPPPPPPPPPPXXXXXX	3.07e-12	168.42	68.525	_LLSLSPS(ph)SSSSSSSRR_	LLS(0.002)LS(0.054)PS(0.8)S(0.065)S(0.065)S(0.009)S(0.001)S(0.002)S(0.002)SRR
gi|472580338	RHTO_06642	381	peptidylprolyl isomerase	2	S	SRLTFDVKLLSLSPSSSSSSSSRR_______	X;X;X;X;X;X;X;X;X;X;X;X;X;X;X;Phospho (STY);X;Phospho (STY);X;Phospho (STY);X;X;X;X;X;X;X;X;X;X;X	XXXXXXXXPPPPPPPPPPPPPPPPXXXXXXX	7.69e-40	195.89	108.37	_LLSLSPSS(ph)SS(ph)SSSSRR_	LLSLSPS(0.023)S(0.501)S(0.16)S(0.349)S(0.218)S(0.242)S(0.242)S(0.266)RR
gi|472580338	RHTO_06642	382	peptidylprolyl isomerase	1	S	RLTFDVKLLSLSPSSSSSSSSRR________	X;X;X;X;X;X;X;X;X;X;X;X;X;X;X;Phospho (STY);X;X;X;X;X;X;X;X;X;X;X;X;X;X;X	XXXXXXXPPPPPPPPPPPPPPPXXXXXXXXX	1.85e-104	261.17	261.17	_LLSLSPSSS(ph)SSSSSR_	LLSLSPSS(0.149)S(0.66)S(0.149)S(0.034)S(0.008)SSR
gi|472580338	RHTO_06642	383	peptidylprolyl isomerase	2	S	LTFDVKLLSLSPSSSSSSSSRR_________	X;X;X;X;X;X;X;X;X;X;X;X;X;Phospho (STY);X;Phospho (STY);Phospho (STY);X;X;X;X;X;X;X;X;X;X;X;X;X;X	XXXXXXPPPPPPPPPPPPPPPPXXXXXXXXX	0.00320489	108.37	80.994	_LLSLSPSSSS(ph)S(ph)SSSRR_	LLSLSPS(0.021)S(0.028)S(0.028)S(0.854)S(0.782)S(0.096)S(0.096)S(0.096)RR
gi|472580338	RHTO_06642	385	peptidylprolyl isomerase	2	S	FDVKLLSLSPSSSSSSSSRR___________	X;X;X;X;X;X;X;X;X;X;X;Phospho (STY);X;X;X;Phospho (STY);Phospho (STY);X;X;X;X;X;X;X;X;X;X;X;X;X;X	XXXXPPPPPPPPPPPPPPPPXXXXXXXXXXX	0.0126633	89.668	84.493	_LLSLSPSSSSSS(ph)S(ph)SRR_	LLSLSPS(0.003)S(0.01)S(0.004)S(0.026)S(0.109)S(0.607)S(0.643)S(0.597)RR
gi|472580338	RHTO_06642	386	peptidylprolyl isomerase	2	S	DVKLLSLSPSSSSSSSSRR____________	X;X;X;X;X;X;X;X;X;X;X;X;X;X;Phospho (STY);Phospho (STY);X;X;X;X;X;X;X;X;X;X;X;X;X;X;X	XXXPPPPPPPPPPPPPPPPXXXXXXXXXXXX	0.0126633	89.668	84.493	_LLSLSPSSSSSS(ph)S(ph)SRR_	LLSLSPS(0.003)S(0.01)S(0.004)S(0.026)S(0.109)S(0.607)S(0.643)S(0.597)RR
gi|472580338	RHTO_06642	387	peptidylprolyl isomerase	2	S	VKLLSLSPSSSSSSSSRR_____________	X;X;X;X;X;X;X;X;Phospho (STY);X;X;X;X;X;X;Phospho (STY);X;X;X;X;X;X;X;X;X;X;X;X;X;X;X	XXPPPPPPPPPPPPPPPPXXXXXXXXXXXXX	0.0126633	89.668	84.493	_LLSLSPSSSSSS(ph)S(ph)SRR_	LLSLSPS(0.003)S(0.01)S(0.004)S(0.026)S(0.109)S(0.607)S(0.643)S(0.597)RR
gi|472580338	RHTO_06642	58	peptidylprolyl isomerase	1	S	ARSAVTMKYPEFEQDSDDEEDDEEEEDEDED	X;X;X;X;X;X;Oxidation (M);X;X;X;X;X;X;X;X;Phospho (STY);X;X;X;X;X;X;X;X;X;X;X;X;X;X;X	XXPPPPPPPPPPPPPPPPPPPPPPPPPPPPP	6.65e-69	186.13	165.48	_SAVTM(ox)KYPEFEQDS(ph)DDEEDDEEEEDEDEDDENIKLPK_	SAVTMKYPEFEQDS(1)DDEEDDEEEEDEDEDDENIKLPK
gi|472580342	RHTO_06646	340	cysteine protease, autophagy-related protein 4, ATG4		S	RAVSRTSTVSALSGASSAGGEKGEGRLARGL	X;X;X;X;X;X;X;X;X;X;X;X;X;X;X;Phospho (STY);X;X;X;X;X;X;X;X;X;X;X;X;X;X;X	XXXXXPPPPPPPPPPPPPPPPPPPPPXXXXX	9e-10	136.96	105.46	_TSTVSALSGAS(ph)SAGGEKGEGR_	TSTVSALS(0.115)GAS(0.443)S(0.443)AGGEKGEGR
gi|472580342	RHTO_06646	341	cysteine protease, autophagy-related protein 4, ATG4		S	AVSRTSTVSALSGASSAGGEKGEGRLARGLR	X;X;X;X;X;X;X;X;X;X;X;X;X;X;X;X;X;X;X;X;X;X;X;X;X;X;X;X;X;X;X	XXXXXXXXXXXXXXXXXXXXXXXXXXXXXXX	9e-10	136.96	105.46	_TSTVSALSGAS(ph)SAGGEKGEGR_	TSTVSALS(0.115)GAS(0.443)S(0.443)AGGEKGEGR
gi|472580351	RHTO_06655	389	DNA-directed RNA polymerase III subunit RPC6	1	S	DAKAKRKRKKKQKAGSDEEDEDDDAPRRKKR	X;X;X;X;X;X;X;X;X;X;X;X;X;X;X;Phospho (STY);X;X;X;X;X;X;X;X;X;X;X;X;X;X;X	XXXXXXXXXXXPPPPPPPPPPPPPPPPXXXX	0.00188135	133.14	97.797	_QKAGS(ph)DEEDEDDDAPR_	QKAGS(1)DEEDEDDDAPR
gi|472580358	RHTO_06662	137	Mpv17/PMP22 family protein	2	S	GLDDKASKLAHHRRKSSVGVQAVEAMPRSPL	X;X;X;X;X;X;X;X;X;X;X;X;X;X;X;Phospho (STY);Phospho (STY);X;X;X;X;X;X;X;X;Oxidation (M);X;X;X;X;X	XXXXXXXXXXXXXPPPPPPPPPPPPPPPXXX	0.00830414	98.592	98.592	_RKS(ph)S(ph)VGVQAVEAM(ox)PR_	RKS(1)S(1)VGVQAVEAMPR
gi|472580358	RHTO_06662	138	Mpv17/PMP22 family protein	2	S	LDDKASKLAHHRRKSSVGVQAVEAMPRSPLL	X;X;X;X;X;X;X;X;X;X;X;X;X;X;Phospho (STY);Phospho (STY);X;X;X;X;X;X;X;X;Oxidation (M);X;X;X;X;X;X	XXXXXXXXXXXXPPPPPPPPPPPPPPPXXXX	0.00830414	98.592	98.592	_RKS(ph)S(ph)VGVQAVEAM(ox)PR_	RKS(1)S(1)VGVQAVEAMPR
gi|472580392	RHTO_06568	174	SNARE associated Golgi protein	1	S	KPTPRPGLNARTRSTSVSSVSSLRSLDPSLH	X;X;X;X;X;X;X;X;X;X;X;X;X;X;X;Phospho (STY);X;X;X;X;X;X;X;X;X;X;X;X;X;X;X	XXXXXXXXXXXXXPPPPPPPPPPPXXXXXXX	0.000183243	124.07	124.07	_STS(ph)VSSVSSLR_	STS(1)VSSVSSLR
gi|472580392	RHTO_06568	179	SNARE associated Golgi protein	1	S	PGLNARTRSTSVSSVSSLRSLDPSLHLGGTT	X;X;X;X;X;X;X;X;X;X;X;X;X;X;X;Phospho (STY);X;X;X;X;X;X;X;X;X;X;X;X;X;X;X	XXXXXXXXPPPPPPPPPPPXXXXXXXXXXXX	6.22e-23	186.16	186.16	_STSVSSVS(ph)SLR_	STSVS(0.009)S(0.076)VS(0.519)S(0.396)LR
gi|472580392	RHTO_06568	180	SNARE associated Golgi protein	1	S	GLNARTRSTSVSSVSSLRSLDPSLHLGGTTF	X;X;X;X;X;X;X;X;X;X;X;X;X;X;X;Phospho (STY);X;X;X;X;X;X;X;X;X;X;X;X;X;X;X	XXXXXXXPPPPPPPPPPPXXXXXXXXXXXXX	0.00590328	121.56	121.56	_STSVSSVSS(ph)LR_	STSVS(0.007)S(0.031)VS(0.186)S(0.776)LR
gi|472580392	RHTO_06568	155	SNARE associated Golgi protein	1;2	S	PPSPNPALQRTADDTSDEDKPTPRPGLNART	X;X;X;X;X;X;X;X;X;X;X;X;X;X;Phospho (STY);Phospho (STY);X;X;X;X;X;X;X;X;X;X;X;X;X;X;X	XXXXXXXXXXPPPPPPPPPPPPPPPPPPPPX	0.000985012	96.379	58.461	_TADDT(ph)S(ph)DEDKPTPRPGLNAR_	T(0.007)ADDT(0.992)S(0.996)DEDKPT(0.005)PRPGLNAR
gi|472580392	RHTO_06568	71	SNARE associated Golgi protein	1	S	EHSLRTLRAPGGGEDSDDEREGGQRAVRGSD	X;X;X;X;X;X;X;X;X;X;X;X;X;X;X;Phospho (STY);X;X;X;X;X;X;X;X;X;X;X;X;X;X;X	XXXXXPPPPPPPPPPPPPPPPPPPPXXXXXX	0.00160532	103.92	103.92	_TLRAPGGGEDS(ph)DDEREGGQR_	TLRAPGGGEDS(1)DDEREGGQR
gi|472580392	RHTO_06568	467	SNARE associated Golgi protein	1	S	DPSTTSSSLPPTSRVSLDLESGGRLGTPREL	X;X;X;X;X;X;X;X;X;X;X;X;X;X;X;Phospho (STY);X;X;X;X;X;X;X;X;X;X;X;X;X;X;X	XXXXXXXXXXXXXXPPPPPPPPPPXXXXXXX	0.00893096	83.204	80.469	_VS(ph)LDLESGGR_	VS(1)LDLESGGR
gi|472580402	RHTO_06578	568	conserved hypothetical protein	1	S	RFGRSRGALPTSQSASGLATPTESHPRGRPR	X;X;X;X;X;X;X;X;X;X;X;X;X;X;X;Phospho (STY);X;X;X;X;X;X;X;X;X;X;X;X;X;X;X	XXXXXXPPPPPPPPPPPPPPPPPPPPPXXXX	0.00106859	80.238	80.238	_GALPTSQSAS(ph)GLATPTESHPR_	GALPT(0.123)S(0.123)QS(0.123)AS(0.632)GLATPTESHPR
gi|472580402	RHTO_06578	600	conserved hypothetical protein	1	S	NRSLLPPHAFLTRSASLPAHAVPQLPQVRAS	X;X;X;X;X;X;X;X;X;X;X;X;X;X;X;Phospho (STY);X;X;X;X;X;X;X;X;X;X;X;X;X;X;X	XXXXXXXXXXXXXPPPPPPPPPPPPPPPPXX	0.00390324	89.358	89.358	_SAS(ph)LPAHAVPQLPQVR_	S(0.121)AS(0.879)LPAHAVPQLPQVR
gi|472580407	RHTO_06583	190	hypothetical protein	2	S	GRGGGVPPSPLRHGASSEDEDGERDEDDDEE	X;X;X;X;X;X;X;X;X;X;X;X;X;X;X;Phospho (STY);Phospho (STY);X;X;X;X;X;X;X;X;X;X;X;X;X;X	XXXXXXXXXXXXPPPPPPPPPPPPPPPPPPP	4.22e-06	80.943	80.943	_HGAS(ph)S(ph)EDEDGERDEDDDEESKYGTVASYR_	HGAS(1)S(1)EDEDGERDEDDDEESKYGTVASYR
gi|472580407	RHTO_06583	191	hypothetical protein	2	S	RGGGVPPSPLRHGASSEDEDGERDEDDDEES	X;X;X;X;X;X;X;X;X;X;X;X;X;X;Phospho (STY);Phospho (STY);X;X;X;X;X;X;X;X;X;X;X;X;X;X;X	XXXXXXXXXXXPPPPPPPPPPPPPPPPPPPP	4.22e-06	80.943	80.943	_HGAS(ph)S(ph)EDEDGERDEDDDEESKYGTVASYR_	HGAS(1)S(1)EDEDGERDEDDDEESKYGTVASYR
gi|472580415	RHTO_06591	406	metal ion binding protein	1	S	LVSTRPQQDEGDGPTSPRERQNPRSALKVLQ	X;X;X;X;X;X;X;X;X;X;X;X;X;X;X;Phospho (STY);X;X;X;X;X;X;X;X;X;X;X;X;X;X;X	PPPPPPPPPPPPPPPPPPXXXXXXXXXXXXX	3.23e-10	93.21	80.994	_GEEDPYGLVSTRPQQDEGDGPTS(ph)PR_	GEEDPY(0.001)GLVS(0.054)T(0.011)RPQQDEGDGPT(0.221)S(0.713)PR
gi|472580419	RHTO_06595	82	serine/threonine protein phosphatase	1	S	GDAGGVDLTPSRSRSSTTASALSRTPTNPAP	X;X;X;X;X;X;X;X;X;X;X;X;X;X;X;Phospho (STY);X;X;X;X;X;X;X;X;X;X;X;X;X;X;X	XXXXXXXXXXXXPPPPPPPPPPPPXXXXXXX	0.00614026	93.909	93.909	_SRSS(ph)TTASALSR_	SRS(0.189)S(0.799)T(0.004)T(0.007)ASALSR
gi|472580420	RHTO_06596	645	inositol/phosphatidylinositol phosphatase	1;2	S	VSVESSAKNRQARKESLLPSLSSPQIKQE__	X;X;X;X;X;X;X;X;X;X;X;X;X;X;X;Phospho (STY);X;X;X;X;X;X;Phospho (STY);X;X;X;X;X;X;X;X	XXXXXXXXXXXXXPPPPPPPPPPPPPPPPXX	5.74e-12	158.81	82.586	_KES(ph)LLPSLSSPQIKQE_	KES(1)LLPSLSSPQIKQE
gi|472580420	RHTO_06596	651	inositol/phosphatidylinositol phosphatase	1	S	AKNRQARKESLLPSLSSPQIKQE________	X;X;X;X;X;X;X;X;X;X;X;X;X;X;X;Phospho (STY);X;X;X;X;X;X;X;X;X;X;X;X;X;X;X	XXXXXXXPPPPPPPPPPPPPPPPXXXXXXXX	3.07e-06	146.77	146.77	_KESLLPSLS(ph)SPQIKQE_	KESLLPSLS(0.5)S(0.5)PQIKQE
gi|472580420	RHTO_06596	652	inositol/phosphatidylinositol phosphatase	1;2	S	KNRQARKESLLPSLSSPQIKQE_________	X;X;X;X;X;X;X;X;Phospho (STY);X;X;X;X;X;X;Phospho (STY);X;X;X;X;X;X;X;X;X;X;X;X;X;X;X	XXXXXXPPPPPPPPPPPPPPPPXXXXXXXXX	3.07e-06	146.77	138.55	_KESLLPSLSS(ph)PQIKQE_	KESLLPSLS(0.001)S(0.999)PQIKQE
gi|472580434	RHTO_06535	499	Homeodomain-like containing protein	1	S	RATATGGNDDPDYLPSPPSAAQGASSSSKGK	X;X;X;X;X;X;X;X;X;X;X;X;X;X;X;Phospho (STY);X;X;X;X;X;X;X;X;X;X;X;X;X;X;X	PPPPPPPPPPPPPPPPPPPPPPPPPPPPPXX	9.84e-05	71.297	52.927	_RATATGGNDDPDYLPS(ph)PPSAAQGASSSSK_	RAT(0.001)AT(0.001)GGNDDPDY(0.001)LPS(0.991)PPS(0.004)AAQGAS(0.001)S(0.001)S(0.001)S(0.001)K
gi|472580435	RHTO_06536	663	COPI vesicle coat beta' subunit	1	S	IALDDLETALSLARSSPHLGSQTKWRAVGDR	X;X;X;X;X;X;X;X;X;X;X;X;X;X;X;Phospho (STY);X;X;X;X;X;X;X;X;X;X;X;X;X;X;X	XXXXXXXXXXXXXXPPPPPPPPPPXXXXXXX	0.00538251	97.456	97.456	_SS(ph)PHLGSQTK_	S(0.01)S(0.99)PHLGSQTK
gi|472580437	RHTO_06538	26	delta-12 fatty acid desaturase	1;2	S	AQPAPRKEKEHDVLASSDSEDEHNQDPIKAL	X;X;X;X;X;X;X;X;X;X;X;X;X;X;X;Phospho (STY);Phospho (STY);X;Phospho (STY);X;X;X;X;X;X;X;X;X;X;X;X	XXXXXXPPPPPPPPPPPPPPPPPPPPPPPXX	0.000535403	78.456	56.9	_KEKEHDVLAS(ph)SDS(ph)EDEHNQDPIK_	KEKEHDVLAS(0.973)S(0.205)DS(0.822)EDEHNQDPIK
gi|472580437	RHTO_06538	27	delta-12 fatty acid desaturase	2	S	QPAPRKEKEHDVLASSDSEDEHNQDPIKALE	X;X;X;X;X;X;X;X;X;X;X;X;X;X;Phospho (STY);Phospho (STY);X;X;X;X;X;X;X;X;X;X;X;X;X;X;X	XXXXXPPPPPPPPPPPPPPPPPPPPPPPXXX	0.000535403	78.456	65.022	_KEKEHDVLAS(ph)S(ph)DSEDEHNQDPIK_	KEKEHDVLAS(0.935)S(0.935)DS(0.13)EDEHNQDPIK
gi|472580437	RHTO_06538	29	delta-12 fatty acid desaturase	1;2	S	APRKEKEHDVLASSDSEDEHNQDPIKALENE	X;X;X;X;X;X;X;X;X;X;X;X;Phospho (STY);X;X;Phospho (STY);X;X;X;X;X;X;X;X;X;X;X;X;X;X;X	XXXPPPPPPPPPPPPPPPPPPPPPPPXXXXX	0.000203616	85.855	70.449	_KEKEHDVLAS(ph)SDS(ph)EDEHNQDPIK_	KEKEHDVLAS(0.806)S(0.194)DS(1)EDEHNQDPIK
gi|472580442	RHTO_06543	612	vacuolar protein sorting-associated protein VPS17	1	S	AGASSVSSRPAPTPGSPTPSRVAPSAPADPL	X;X;X;X;X;X;X;X;X;X;X;X;X;X;X;Phospho (STY);X;X;X;X;X;X;X;X;X;X;X;X;X;X;X	PPPPPPPPPPPPPPPPPPPPPXXXXXXXXXX	1.46e-05	94.019	94.019	_AGAGASSVSSRPAPTPGS(ph)PTPSR_	AGAGASSVSSRPAPT(0.019)PGS(0.712)PT(0.227)PS(0.042)R
gi|472580447	RHTO_06548	21	vesicular-fusion protein Sec18	1	S	RTGDQPPQQQPQRGYSPLPPAQQPTRHHLPT	X;X;X;X;X;X;X;X;X;X;X;X;X;X;X;Phospho (STY);X;X;X;X;X;X;X;X;X;X;X;X;X;X;X	XXXXXXXXXXXXXPPPPPPPPPPPPPXXXXX	3.52e-06	159.4	141.97	_GYS(ph)PLPPAQQPTR_	GYS(1)PLPPAQQPTR
gi|472580448	RHTO_06549	268	DUF3661 family vacuolar membrane protein	1	S	LRRGFLDSHDDEDEESDHEGAGGRTGAGYSD	X;X;X;X;X;X;X;X;X;X;X;X;X;X;X;Phospho (STY);X;X;X;X;X;X;X;X;X;X;X;X;X;X;X	XXPPPPPPPPPPPPPPPPPPPPPPXXXXXXX	0.000299871	84.581	84.581	_RGFLDSHDDEDEES(ph)DHEGAGGR_	RGFLDSHDDEDEES(1)DHEGAGGR
gi|472580449	RHTO_06550	30	BSD domain protein	1;5	S	PSRTSTPTPAQPEPESPTRQALTAAQGLEKE	X;Phospho (STY);X;Phospho (STY);X;Phospho (STY);X;Phospho (STY);X;X;X;X;X;X;X;Phospho (STY);X;Phospho (STY);X;X;X;X;X;X;X;X;X;X;X;X;X	PPPPPPPPPPPPPPPPPPPPPPPPPPPPPPX	7.26e-05	82.477	82.477	_TSTPTPAQPEPES(ph)PTRQALTAAQGLEK_	TSTPTPAQPEPES(0.813)PT(0.104)RQALT(0.082)AAQGLEK
gi|472580455	RHTO_06556	543	ferric-chelate reductase	1;2;3	S	FVTRSETLVLGGSKASSSEDLGGVQEVASPP	X;X;X;X;Phospho (STY);X;X;X;X;X;X;X;Phospho (STY);X;X;Phospho (STY);Phospho (STY);Phospho (STY);X;X;X;X;X;X;X;X;X;X;X;X;X	XXXXPPPPPPPPPPPPPPPPPPPPPPPPPPP	9.76e-66	191.98	93.043	_SETLVLGGS(ph)KAS(ph)S(ph)SEDLGGVQEVASPPLVLQSGRPDIAK_	S(0.092)ET(0.092)LVLGGS(0.836)KAS(0.842)S(0.57)S(0.57)EDLGGVQEVASPPLVLQSGRPDIAK
gi|472580455	RHTO_06556	544	ferric-chelate reductase	1;2;3	S	VTRSETLVLGGSKASSSEDLGGVQEVASPPL	X;X;X;X;X;X;X;X;X;X;X;Phospho (STY);X;X;Phospho (STY);Phospho (STY);Phospho (STY);X;X;X;X;X;X;X;X;X;X;X;X;X;X	XXXPPPPPPPPPPPPPPPPPPPPPPPPPPPP	3.45e-66	198.03	52.927	_AS(ph)S(ph)SEDLGGVQEVASPPLVLQSGRPDIAK_	AS(0.826)S(0.826)S(0.347)EDLGGVQEVASPPLVLQSGRPDIAK
gi|472580455	RHTO_06556	545	ferric-chelate reductase	1;2;3	S	TRSETLVLGGSKASSSEDLGGVQEVASPPLV	X;X;X;X;X;X;X;X;X;X;Phospho (STY);X;X;Phospho (STY);Phospho (STY);Phospho (STY);X;X;X;X;X;X;X;X;X;X;X;X;X;X;X	XXPPPPPPPPPPPPPPPPPPPPPPPPPPPPP	1.2e-20	112.13	60.288	_SETLVLGGS(ph)KAS(ph)SS(ph)EDLGGVQEVASPPLVLQSGRPDIAK_	S(0.149)ET(0.149)LVLGGS(0.625)KAS(0.603)S(0.603)S(0.869)EDLGGVQEVASPPLVLQSGRPDIAK
gi|472580455	RHTO_06556	532	ferric-chelate reductase	2	S	WMGVEKLEVDIFVTRSETLVLGGSKASSSED	X;X;X;X;X;X;X;X;X;X;X;X;X;X;X;Phospho (STY);X;Phospho (STY);X;X;X;X;X;Phospho (STY);X;X;Phospho (STY);Phospho (STY);Phospho (STY);X;X	XXXXXXXXXXXXXXXPPPPPPPPPPPPPPPP	0.000749304	61.958	54.05	_S(ph)ET(ph)LVLGGSKASSSEDLGGVQEVASPPLVLQSGRPDIAK_	S(0.76)ET(0.76)LVLGGS(0.168)KAS(0.132)S(0.13)S(0.051)EDLGGVQEVASPPLVLQSGRPDIAK
gi|472580455	RHTO_06556	540	ferric-chelate reductase	1;3	S	VDIFVTRSETLVLGGSKASSSEDLGGVQEVA	X;X;X;X;X;X;X;Phospho (STY);X;X;X;X;X;X;X;Phospho (STY);X;X;Phospho (STY);Phospho (STY);Phospho (STY);X;X;X;X;X;X;X;X;X;X	XXXXXXXPPPPPPPPPPPPPPPPPPPPPPPP	1.2e-20	105.9	95.264	_SETLVLGGS(ph)K_	SETLVLGGS(1)K
gi|472580466	RHTO_06567	271	conserved hypothetical protein	1	S	NIEATEKAKRALREGSRPGSGPEEAAGLPPD	X;X;X;X;X;X;X;X;X;X;X;X;X;X;X;Phospho (STY);X;X;X;X;X;X;X;X;X;X;X;X;X;X;X	XXXXXXXXXXXXXPPPPPPPPPPPPPPPPPP	9.95e-06	85.518	85.518	_EGS(ph)RPGSGPEEAAGLPPDKDEFAVDR_	EGS(0.968)RPGS(0.032)GPEEAAGLPPDKDEFAVDR
gi|472580466	RHTO_06567	275	conserved hypothetical protein	1	S	TEKAKRALREGSRPGSGPEEAAGLPPDKDEF	X;X;X;X;X;X;X;X;X;X;X;X;X;X;X;Phospho (STY);X;X;X;X;X;X;X;X;X;X;X;X;X;X;X	XXXXXXXXXPPPPPPPPPPPPPPPPPPPPPP	1.55e-05	83.165	60.735	_EGSRPGS(ph)GPEEAAGLPPDKDEFAVDR_	EGS(0.012)RPGS(0.988)GPEEAAGLPPDKDEFAVDR
gi|472580474	RHTO_06495	497	conserved hypothetical protein	1	S	VSPTLTRDEGFLSAASPTARDARPLSYASDS	X;X;X;X;X;X;X;X;X;X;X;X;X;X;X;Phospho (STY);X;X;X;X;X;X;X;X;X;X;X;X;X;X;X	XXXXXXXPPPPPPPPPPPPPXXXXXXXXXXX	0.00274551	90.561	90.561	_DEGFLSAAS(ph)PTAR_	DEGFLS(0.005)AAS(0.992)PT(0.002)AR
gi|472580474	RHTO_06495	100	conserved hypothetical protein		S	ANDPFPSAQQRIRGESSPALSRHSTRDPFDD	X;X;X;X;X;X;X;X;X;X;X;X;X;X;X;Phospho (STY);X;X;X;X;X;X;X;X;X;X;X;X;X;X;X	XXXXXXXXXXXPPPPPPPPPPPXXXXXXXXX	0.00144739	117.7	117.7	_IRGES(ph)SPALSR_	IRGES(0.5)S(0.5)PALSR
gi|472580474	RHTO_06495	101	conserved hypothetical protein		S	NDPFPSAQQRIRGESSPALSRHSTRDPFDDV	X;X;X;X;X;X;X;X;X;X;X;X;X;X;X;X;X;X;X;X;X;X;X;X;X;X;X;X;X;X;X	XXXXXXXXXXXXXXXXXXXXXXXXXXXXXXX	0.00144739	117.7	117.7	_IRGES(ph)SPALSR_	IRGES(0.5)S(0.5)PALSR
gi|472580474	RHTO_06495	867	conserved hypothetical protein	2	S	SSAATSSTGGPSRKASVPTPTSLNAPTFATL	X;X;X;X;X;X;X;X;X;X;X;X;X;X;X;Phospho (STY);X;X;Phospho (STY);X;X;X;X;X;X;X;X;X;X;X;X	XXXXXXXXXXXXXPPPPPPPPPPPPPPPPPP	0.000107236	112.16	93.381	_KAS(ph)VPT(ph)PTSLNAPTFATLGR_	KAS(0.876)VPT(0.524)PT(0.512)S(0.088)LNAPTFATLGR
gi|472580474	RHTO_06495	283	conserved hypothetical protein	1	S	MARVEDGSKEMERKLSTGGVREGETVEEYEK	X;X;X;X;X;X;X;X;X;X;X;X;X;X;X;Phospho (STY);X;X;X;X;X;X;X;X;X;X;X;X;X;X;X	XXXXXXXXXXXXXPPPPPPPPXXXXXXXXXX	0.0028948	112.13	102.53	_KLS(ph)TGGVR_	KLS(0.998)T(0.002)GGVR
gi|472580474	RHTO_06495	634	conserved hypothetical protein	1;2	S	SVPGLAHLAPFMRRGSSASALTAASGETLRI	X;X;X;X;X;X;X;X;X;X;X;X;X;X;X;Phospho (STY);Phospho (STY);X;X;X;X;X;X;X;X;X;X;X;X;X;X	XXXXXXXXXXXXXPPPPPPPPPPPPPPPPPX	5.79e-07	123.42	93.633	_RGS(ph)S(ph)ASALTAASGETLR_	RGS(0.999)S(0.991)AS(0.009)ALTAASGETLR
gi|472580474	RHTO_06495	635	conserved hypothetical protein	2	S	VPGLAHLAPFMRRGSSASALTAASGETLRIG	X;X;X;X;X;X;X;X;X;X;X;X;X;X;Phospho (STY);Phospho (STY);X;X;X;X;X;X;X;X;X;X;X;X;X;X;X	XXXXXXXXXXXXPPPPPPPPPPPPPPPPPXX	5.79e-07	123.42	93.633	_RGS(ph)S(ph)ASALTAASGETLR_	RGS(0.999)S(0.991)AS(0.009)ALTAASGETLR
gi|472580474	RHTO_06495	637	conserved hypothetical protein		S	GLAHLAPFMRRGSSASALTAASGETLRIGYG	X;X;X;X;X;X;X;X;X;X;X;X;X;X;X;Phospho (STY);X;X;X;X;X;X;X;X;X;X;X;X;X;X;X	XXXXXXXXXXPPPPPPPPPPPPPPPPPXXXX	5.79e-07	123.42	86.378	_RGSSAS(ph)ALTAASGETLR_	RGS(0.291)S(0.291)AS(0.411)ALT(0.007)AASGETLR
gi|472580497	RHTO_06518	682	protein serine/threonine kinase	1	S	GRSSFDFDNPDPDDSSLSRTITADTPAHLLV	X;X;X;X;X;X;X;X;X;X;X;X;X;X;X;Phospho (STY);X;X;X;X;X;X;X;X;X;X;X;X;X;X;X	XXPPPPPPPPPPPPPPPPPXXXXXXXXXXXX	1.09e-78	211.17	195.18	_SSFDFDNPDPDDSS(ph)LSR_	SSFDFDNPDPDDS(0.03)S(0.967)LS(0.004)R
gi|472580497	RHTO_06518	411	protein serine/threonine kinase	1	S	RTTTDEEPFLDSAPNSPRAGAGQLVARTKTY	X;X;X;X;X;X;X;X;X;X;X;X;X;X;X;Phospho (STY);X;X;X;X;X;X;X;X;X;X;X;X;X;X;X	XPPPPPPPPPPPPPPPPPXXXXXXXXXXXXX	1.61e-13	162.83	73.834	_TTTDEEPFLDSAPNS(ph)PR_	TTTDEEPFLDS(0.009)APNS(0.991)PR
gi|472580498	RHTO_06519	133	hypothetical protein	1	S	FFSPPERTISPIAGTSDNEDDDARGGSRRDS	X;X;X;X;X;X;X;X;X;X;X;X;X;X;X;X;X;X;X;X;X;X;X;X;X;X;X;X;X;X;X	XXXXXXXXXXXXXXXXXXXXXXXXXXXXXXX	8.03e-12	144.05	144.05	_TISPIAGT(ph)SDNEDDDARGGSR_	TISPIAGT(0.5)S(0.5)DNEDDDARGGSR
gi|472580502	RHTO_06523	165	proton-dependent oligopeptide transporter, POT family	1;2	S	PHVGPRKRGSWQSPDSPDHVVGNPYEDQLRR	X;X;X;X;X;X;X;X;X;Phospho (STY);X;X;Phospho (STY);X;X;Phospho (STY);X;X;X;X;X;X;X;X;X;X;X;X;X;X;X	XXXXXXPPPPPPPPPPPPPPPPPPPPPPPPX	7.33e-05	107.41	107.41	_GSWQSPDS(ph)PDHVVGNPYEDQLR_	GSWQSPDS(1)PDHVVGNPYEDQLR
gi|472580519	RHTO_06454	698	protein of Arf GTPase activating protein family	1	S	SLLGTNGATGDGRSVSPAPFDFTPSPARTPQ	X;X;X;X;X;X;X;X;X;X;X;X;X;X;X;Phospho (STY);X;X;X;X;X;X;X;X;X;X;X;X;X;X;X	XXXXXXXXXXXXXPPPPPPPPPPPPPPPXXX	0.000508011	111.01	111.01	_SVS(ph)PAPFDFTPSPAR_	S(0.001)VS(0.999)PAPFDFTPSPAR
gi|472580524	RHTO_06459	888	Ankyrin repeat protein	1	S	PAWRAIPHVDRLVPPSPGRRSVSPGATSSTP	X;X;X;X;X;X;X;X;X;X;X;X;X;X;X;Phospho (STY);X;X;X;X;X;X;X;X;X;X;X;X;X;X;X	XXXXXXXXXXXPPPPPPPPPXXXXXXXXXXX	0.0113322	100.55	100.55	_LVPPS(ph)PGRR_	LVPPS(1)PGRR
gi|472580524	RHTO_06459	341	Ankyrin repeat protein	1;2	S	GGGGSSSSTPSTRRLSFNSLRSGNGAANGGA	X;X;X;X;X;X;X;X;X;X;X;X;X;X;X;Phospho (STY);X;X;Phospho (STY);X;X;X;X;X;X;X;X;X;X;X;X	XXXXXXXXXXXXXPPPPPPPPXXXXXXXXXX	0.00429359	105.03	105.03	_RLS(ph)FNS(ph)LR_	RLS(1)FNS(1)LR
gi|472580524	RHTO_06459	344	Ankyrin repeat protein	2	S	GSSSSTPSTRRLSFNSLRSGNGAANGGAAKD	X;X;X;X;X;X;X;X;X;X;X;X;Phospho (STY);X;X;Phospho (STY);X;X;X;X;X;X;X;X;X;X;X;X;X;X;X	XXXXXXXXXXPPPPPPPPXXXXXXXXXXXXX	0.00429359	105.03	105.03	_RLS(ph)FNS(ph)LR_	RLS(1)FNS(1)LR
gi|472580525	RHTO_06460	371	histidine kinase	1	S	FRLPVNEIDAGSSDISPRSEKDNPLAGLVSS	X;X;X;X;X;X;X;X;X;X;X;X;X;X;X;Phospho (STY);X;X;X;X;X;X;X;X;X;X;X;X;X;X;X	XXPPPPPPPPPPPPPPPPXXXXXXXXXXXXX	1.44e-05	122.63	122.63	_LPVNEIDAGSSDIS(ph)PR_	LPVNEIDAGSS(0.001)DIS(0.999)PR
gi|472580525	RHTO_06460	330	histidine kinase	1	S	SKLPASVEGLTGRRQSFDQALVTLSQKTDGT	X;X;X;X;X;X;X;X;X;X;X;X;X;X;X;Phospho (STY);X;X;X;X;X;X;X;X;X;X;X;X;X;X;X	XXXXXXXXXXXXXPPPPPPPPPPPPPPXXXX	3.48e-06	129.37	125.53	_RQS(ph)FDQALVTLSQK_	RQS(1)FDQALVTLSQK
gi|472580525	RHTO_06460	339	histidine kinase	2	S	LTGRRQSFDQALVTLSQKTDGTARADGTGPI	X;X;X;X;X;X;X;X;X;X;X;X;X;Phospho (STY);X;Phospho (STY);X;X;X;X;X;X;X;X;X;X;X;X;X;X;X	XXXXPPPPPPPPPPPPPPXXXXXXXXXXXXX	0.0118892	75.911	75.911	_RQSFDQALVT(ph)LS(ph)QK_	RQS(0.006)FDQALVT(0.994)LS(1)QK
gi|472580526	RHTO_06461	445	hypothetical protein	1	S	SPVSRIQGETQAEPKSPLERLQMRIERERKG	X;X;X;X;X;X;X;X;X;X;X;X;X;X;X;Phospho (STY);X;X;X;X;X;X;X;X;X;X;X;X;X;X;X	XXXXXPPPPPPPPPPPPPPPXXXXXXXXXXX	1.98e-08	156.92	156.92	_IQGETQAEPKS(ph)PLER_	IQGETQAEPKS(1)PLER
gi|472580527	RHTO_06462	535	hypothetical protein	1	S	AKLSKEKKGAVETTNSPVAYRARESGLPDFS	X;X;X;X;X;X;X;X;X;X;X;X;X;X;X;Phospho (STY);X;X;X;X;X;X;X;X;X;X;X;X;X;X;X	XXXXXXXXPPPPPPPPPPPPPXXXXXXXXXX	0.00386235	138.91	115.38	_GAVETTNS(ph)PVAYR_	GAVET(0.001)T(0.122)NS(0.877)PVAYR
gi|472580537	RHTO_06472	3	hypothetical protein	3	S	_____________MLSQALSQPNQATPAPIR	X;X;X;X;X;X;X;X;X;X;X;X;X;X;X;Phospho (STY);X;X;X;Phospho (STY);X;X;X;X;X;Phospho (STY);X;X;X;X;X	XXXXXXXXXXXXXXPPPPPPPPPPPPPPPPP	0.00711133	30.072	30.072	_(ac)LS(ph)QALS(ph)QPNQAT(ph)PAPIRR_	LS(1)QALS(1)QPNQAT(1)PAPIRR
gi|472580537	RHTO_06472	7	hypothetical protein	3	S	_________MLSQALSQPNQATPAPIRRLPH	X;X;X;X;X;X;X;X;X;X;X;Phospho (STY);X;X;X;Phospho (STY);X;X;X;X;X;Phospho (STY);X;X;X;X;X;X;X;X;X	XXXXXXXXXXPPPPPPPPPPPPPPPPPPXXX	0.00711133	30.072	30.072	_(ac)LS(ph)QALS(ph)QPNQAT(ph)PAPIRR_	LS(1)QALS(1)QPNQAT(1)PAPIRR
gi|472580543	RHTO_06478	90	conserved hypothetical protein	2	S	EEGMLMREEERGGTHSSDEEEDGAGFASYGD	X;X;X;X;X;X;X;X;X;X;X;X;X;Phospho (STY);X;Phospho (STY);Phospho (STY);X;X;X;X;X;X;X;X;X;X;X;X;X;X	XXXXXXXXXXXPPPPPPPPPPPPPPPPPPPP	3.77e-14	126.51	96.848	_GGTHS(ph)S(ph)DEEEDGAGFASYGDFEAAGK_	GGT(0.157)HS(0.866)S(0.977)DEEEDGAGFASYGDFEAAGK
gi|472580543	RHTO_06478	91	conserved hypothetical protein	2	S	EGMLMREEERGGTHSSDEEEDGAGFASYGDF	X;X;X;X;X;X;X;X;X;X;X;X;X;X;Phospho (STY);Phospho (STY);X;X;X;X;X;X;X;X;X;X;X;X;X;X;X	XXXXXXXXXXPPPPPPPPPPPPPPPPPPPPP	3.77e-14	126.51	96.848	_GGTHS(ph)S(ph)DEEEDGAGFASYGDFEAAGK_	GGT(0.157)HS(0.866)S(0.977)DEEEDGAGFASYGDFEAAGK
gi|472580545	RHTO_06480	35	rhodocoxin reductase	1	S	PLRLAAAMSTRIRVASLGDLKNGEMKEIPFP	X;X;X;X;X;X;X;X;X;X;X;X;X;X;X;Phospho (STY);X;X;X;X;X;X;X;X;X;X;X;X;X;X;X	XXXXXXXXXXXXXPPPPPPPPXXXXXXXXXX	0.00255866	136.02	121.36	_VAS(ph)LGDLK_	VAS(1)LGDLK
gi|472580552	RHTO_06487	396	C6 transcription factor		S	SLASAPSSESSSSRPSSSSERSQSRSRTSRE	X;X;X;X;X;X;X;X;X;X;X;X;X;X;X;Phospho (STY);X;X;X;X;X;X;X;X;X;X;X;X;X;X;X	PPPPPPPPPPPPPPPPPPPPPXXXXXXXXXX	1.24e-05	100.97	100.97	_LVSLASAPSSESSSSRPS(ph)SSSER_	LVSLASAPS(0.001)S(0.001)ES(0.008)S(0.008)S(0.008)S(0.008)RPS(0.397)S(0.397)S(0.085)S(0.085)ER
gi|472580552	RHTO_06487	397	C6 transcription factor		S	LASAPSSESSSSRPSSSSERSQSRSRTSRER	X;X;X;X;X;X;X;X;X;X;X;X;X;X;X;X;X;X;X;X;X;X;X;X;X;X;X;X;X;X;X	XXXXXXXXXXXXXXXXXXXXXXXXXXXXXXX	1.24e-05	100.97	100.97	_LVSLASAPSSESSSSRPS(ph)SSSER_	LVSLASAPS(0.001)S(0.001)ES(0.008)S(0.008)S(0.008)S(0.008)RPS(0.397)S(0.397)S(0.085)S(0.085)ER
gi|472580564	RHTO_06396	127	MFS efflux transporter	1	S	ELEEQLRGRSAARRGSVSQTEAEVARRPRWK	X;X;X;X;X;X;X;X;X;X;X;X;X;X;X;Phospho (STY);X;X;X;X;X;X;X;X;X;X;X;X;X;X;X	XXXXXXXXXXXXXPPPPPPPPPPPPPXXXXX	8.98e-05	148.44	148.44	_RGS(ph)VSQTEAEVAR_	RGS(1)VSQTEAEVAR
gi|472580572	RHTO_06404	700	zinc finger, C2H2-type transcription factor	1	S	SNGDAHHVVGNKRGRSAVDSDAEGGAGSDAA	X;X;X;X;X;X;X;X;X;X;X;X;X;X;X;Phospho (STY);X;X;X;X;X;X;X;X;X;X;X;X;X;X;X	XXXXXXXXXXXXXPPPPPPPPPPPPPPPPPP	7.08e-17	142.23	92.38	_GRS(ph)AVDSDAEGGAGSDAAVDKR_	GRS(0.998)AVDS(0.002)DAEGGAGSDAAVDKR
gi|472580575	RHTO_06407	67	TEA domain family protein	1	S	SSSTAAATPKKRGRASIAPGAGEEDSPKSAK	Phospho (STY);Phospho (STY);Phospho (STY);X;X;X;X;X;X;X;X;X;X;X;X;Phospho (STY);X;X;X;X;X;X;X;X;X;X;X;X;X;X;X	XXXXXXXXXXXXPPPPPPPPPPPPPPPPXXX	2.34e-06	128.9	128.9	_GRAS(ph)IAPGAGEEDSPK_	GRAS(1)IAPGAGEEDSPK
gi|472580575	RHTO_06407	77	TEA domain family protein	1;2	S	KRGRASIAPGAGEEDSPKSAKRGKKDEGGGD	X;X;X;X;X;X;X;X;X;X;X;X;X;X;X;Phospho (STY);X;X;Phospho (STY);X;X;X;X;X;X;X;X;X;X;X;X	XXXXPPPPPPPPPPPPPPPPPPXXXXXXXXX	8.71e-79	214.14	91.441	_ASIAPGAGEEDS(ph)PKS(ph)AKR_	ASIAPGAGEEDS(1)PKS(1)AKR
gi|472580575	RHTO_06407	80	TEA domain family protein	1;2	S	RASIAPGAGEEDSPKSAKRGKKDEGGGDLWD	X;X;Phospho (STY);X;X;X;X;X;X;X;X;X;Phospho (STY);X;X;Phospho (STY);X;X;X;X;X;X;X;X;X;X;X;X;X;X;X	XPPPPPPPPPPPPPPPPPPXXXXXXXXXXXX	0.00609902	100.19	91.441	_ASIAPGAGEEDS(ph)PKS(ph)AKR_	ASIAPGAGEEDS(1)PKS(1)AKR
gi|472580575	RHTO_06407	48	TEA domain family protein	1;2	S	STSPLKTRASLRTRESSIASSSTAAATPKKR	X;Phospho (STY);X;X;X;X;X;X;X;X;X;X;Phospho (STY);X;X;Phospho (STY);X;X;X;Phospho (STY);X;X;X;X;X;X;X;X;X;X;X	XXXXXXXXXXXXPPPPPPPPPPPPPPPPPXX	1.91e-10	152.5	93.494	_T(ph)RES(ph)SIASSSTAAATPK_	T(0.768)RES(0.768)S(0.182)IAS(0.159)S(0.054)S(0.035)T(0.035)AAATPK
gi|472580575	RHTO_06407	49	TEA domain family protein	1;2	S	TSPLKTRASLRTRESSIASSSTAAATPKKRG	Phospho (STY);X;X;X;X;X;X;X;X;X;X;X;X;X;X;Phospho (STY);X;X;Phospho (STY);Phospho (STY);Phospho (STY);X;X;X;X;X;X;X;X;X;X	XXXXXXXXXXXPPPPPPPPPPPPPPPPPXXX	9.68e-10	139	110.38	_TRESS(ph)IASSSTAAATPK_	T(0.038)RES(0.038)S(0.915)IASS(0.001)S(0.004)T(0.004)AAATPK
gi|472580575	RHTO_06407	52	TEA domain family protein	2	S	LKTRASLRTRESSIASSSTAAATPKKRGRAS	X;X;X;X;X;X;X;X;Phospho (STY);X;X;Phospho (STY);Phospho (STY);X;X;Phospho (STY);X;Phospho (STY);X;X;X;X;X;X;X;X;X;X;X;X;Phospho (STY)	XXXXXXXXPPPPPPPPPPPPPPPPPXXXXXX	1.91e-10	152.5	103.31	_TRESS(ph)IAS(ph)SSTAAATPK_	T(0.147)RES(0.035)S(0.776)IAS(0.952)S(0.037)S(0.026)T(0.026)AAATPK
gi|472580575	RHTO_06407	53	TEA domain family protein	2	S	KTRASLRTRESSIASSSTAAATPKKRGRASI	X;X;X;X;X;X;X;X;X;X;X;Phospho (STY);X;X;X;Phospho (STY);Phospho (STY);X;X;X;X;X;X;X;X;X;X;X;X;Phospho (STY);X	XXXXXXXPPPPPPPPPPPPPPPPPXXXXXXX	0.000311832	118.96	118.96	_TRESS(ph)IASS(ph)STAAATPK_	T(0.169)RES(0.357)S(0.461)IAS(0.04)S(0.963)S(0.005)T(0.005)AAATPK
gi|472580575	RHTO_06407	54	TEA domain family protein	2	S	TRASLRTRESSIASSSTAAATPKKRGRASIA	X;X;X;X;X;X;X;X;X;X;Phospho (STY);X;X;Phospho (STY);Phospho (STY);Phospho (STY);X;X;X;X;X;X;X;X;X;X;X;X;Phospho (STY);X;X	XXXXXXPPPPPPPPPPPPPPPPPXXXXXXXX	0.00273109	107.25	107.25	_TRESSIASS(ph)S(ph)TAAATPK_	T(0.05)RES(0.011)S(0.05)IAS(0.1)S(0.818)S(0.611)T(0.36)AAATPK
gi|472580575	RHTO_06407	317	TEA domain family protein	2	S	AATTPGTASRRSARHSLAADASAVEATTDDE	X;X;X;X;X;X;X;X;X;X;X;X;X;X;X;X;X;X;X;X;X;X;X;X;X;X;X;X;X;X;X	XXXXXXXXXXXXXXXXXXXXXXXXXXXXXXX	1.45e-16	142.98	142.98	_S(ph)ARHSLAADASAVEAT(ph)TDDETPR_	S(0.5)ARHS(0.5)LAADASAVEAT(0.862)T(0.138)DDETPR
gi|472580575	RHTO_06407	248	TEA domain family protein	1;2	S	RKLRTDDEDETDGLTSEAEASGTPRRRGPGR	X;X;X;X;Phospho (STY);X;X;X;X;X;Phospho (STY);X;X;X;X;Phospho (STY);X;X;X;X;X;X;X;X;X;X;X;X;X;X;X	XPPPPPPPPPPPPPPPPPPPPPPPPXXXXXX	1.13e-43	176.14	157.55	_KLRTDDEDETDGLTS(ph)EAEASGTPR_	KLRTDDEDETDGLT(0.036)S(0.964)EAEASGTPR
gi|472580575	RHTO_06407	253	TEA domain family protein		S	DDEDETDGLTSEAEASGTPRRRGPGRPRKSV	X;X;X;X;X;X;X;X;X;X;X;X;X;X;X;Phospho (STY);X;X;X;X;X;X;X;X;X;X;X;X;X;Phospho (STY);X	PPPPPPPPPPPPPPPPPPPPXXXXXXXXXXX	0.00623508	73.676	73.676	_KLRTDDEDETDGLTSEAEAS(ph)GTPR_	KLRTDDEDETDGLT(0.006)S(0.006)EAEAS(0.494)GT(0.494)PR
gi|472580575	RHTO_06407	225	TEA domain family protein	2	S	EHRELVVKQQKARRKSHSGSPAPRKLRTDDE	X;X;X;X;X;X;X;X;X;X;X;X;X;X;X;Phospho (STY);X;X;X;Phospho (STY);X;X;X;X;X;X;X;Phospho (STY);X;X;X	XXXXXXXXXXXXXXPPPPPPPPPPXXXXXXX	0.0112276	100.4	100.4	_KS(ph)HSGS(ph)PAPR_	KS(0.999)HS(0.207)GS(0.794)PAPR
gi|472580575	RHTO_06407	229	TEA domain family protein	1;2	S	LVVKQQKARRKSHSGSPAPRKLRTDDEDETD	X;X;X;X;X;X;X;X;X;X;X;Phospho (STY);X;X;X;Phospho (STY);X;X;X;X;X;X;X;Phospho (STY);X;X;X;X;X;Phospho (STY);X	XXXXXXXXXXPPPPPPPPPPXXXXXXXXXXX	0.00103642	110.08	89.403	_SHSGS(ph)PAPR_	SHS(0.002)GS(0.998)PAPR
gi|472580575	RHTO_06407	267	TEA domain family protein	1;3	S	ASGTPRRRGPGRPRKSVVASSSAASNSTPAR	X;Phospho (STY);X;X;X;X;X;X;X;X;X;X;X;X;X;Phospho (STY);X;X;X;Phospho (STY);Phospho (STY);X;X;X;X;X;X;X;X;X;X	XXXXXXXXXXXXXXPPPPPPPPPPPPPPPPP	0.00719871	75.184	75.184	_KS(ph)VVASSSAASNSTPAR_	KS(1)VVASSSAASNSTPAR
gi|472580575	RHTO_06407	271	TEA domain family protein	3	S	PRRRGPGRPRKSVVASSSAASNSTPARARTP	X;X;X;X;X;X;X;X;X;X;X;Phospho (STY);X;X;X;Phospho (STY);Phospho (STY);X;X;X;X;X;X;X;X;X;X;X;X;X;X	XXXXXXXXXXPPPPPPPPPPPPPPPPPXXXX	0.00719871	70.391	70.391	_KS(ph)VVAS(ph)S(ph)SAASNSTPAR_	KS(0.987)VVAS(0.734)S(0.486)S(0.438)AAS(0.341)NS(0.007)T(0.006)PAR
gi|472580575	RHTO_06407	272	TEA domain family protein		S	RRRGPGRPRKSVVASSSAASNSTPARARTPR	X;X;X;X;X;X;X;X;X;X;Phospho (STY);X;X;X;Phospho (STY);Phospho (STY);X;X;X;X;X;X;X;X;X;X;X;X;X;X;X	XXXXXXXXXPPPPPPPPPPPPPPPPPXXXXX	0.00719871	70.391	70.391	_KS(ph)VVAS(ph)S(ph)SAASNSTPAR_	KS(0.987)VVAS(0.734)S(0.486)S(0.438)AAS(0.341)NS(0.007)T(0.006)PAR
gi|472580575	RHTO_06407	273	TEA domain family protein	1	S	RRGPGRPRKSVVASSSAASNSTPARARTPRK	X;X;X;X;X;X;X;X;X;X;X;X;X;X;X;Phospho (STY);X;X;X;X;X;X;X;X;X;X;X;X;X;X;X	XXXXXXXXPPPPPPPPPPPPPPPPPXXXXXX	0.000124824	113.53	113.53	_KSVVASSS(ph)AASNSTPAR_	KS(0.091)VVAS(0.05)S(0.011)S(0.848)AASNSTPAR
gi|472580575	RHTO_06407	313	TEA domain family protein	2	S	SSAYAATTPGTASRRSARHSLAADASAVEAT	X;X;X;X;X;X;X;X;X;X;X;X;X;X;X;Phospho (STY);X;X;X;X;X;X;X;X;X;X;X;X;X;X;Phospho (STY)	XXXXXXXXXXXXXXXPPPPPPPPPPPPPPPP	1.45e-16	142.98	142.98	_S(ph)ARHSLAADASAVEAT(ph)TDDETPR_	S(0.5)ARHS(0.5)LAADASAVEAT(0.862)T(0.138)DDETPR
gi|472580575	RHTO_06407	35	TEA domain family protein		S	HTLEAPASSTSAASTSPLKTRASLRTRESSI	X;X;X;X;X;X;X;X;X;X;X;X;X;X;X;X;X;X;X;X;X;X;X;X;X;Phospho (STY);X;X;Phospho (STY);Phospho (STY);X	XXXXXXXXXXXXXXXXXXXXXXXXXXXXXXX	1.52e-08	97.5	97.5	_TSEIHLPSHTLEAPASSTSAAST(ph)SPLK_	TSEIHLPSHTLEAPASSTSAAS(0.02)T(0.49)S(0.49)PLK
gi|472580579	RHTO_06411	128	autophagy-related protein 9	1	S	ETDERDPFAMDQTAPSPKLDDSRSLSPTPTG	X;X;X;X;X;X;X;X;X;Oxidation (M);X;X;X;X;X;Phospho (STY);X;X;X;X;X;X;X;X;X;X;X;X;X;X;X	PPPPPPPPPPPPPPPPPPXXXXXXXXXXXXX	0.00797623	55.22	55.22	_GGQQDYEGAGAGGTHVQETDERDPFAM(ox)DQTAPS(ph)PK_	GGQQDYEGAGAGGTHVQET(0.004)DERDPFAMDQT(0.015)APS(0.98)PK
gi|472580581	RHTO_06413	295	hypothetical protein	1	S	SGVEMTFGSSTSRARSGSGVSLSGFGGGGGG	X;X;X;X;X;X;X;X;X;X;X;X;X;X;X;Phospho (STY);X;X;X;X;X;X;X;X;X;X;X;X;X;X;X	XXXXXXXXXXXXXXXPPPPPPPPPPPPPPPP	0.00180151	88.264	85.51	_S(ph)GSGVSLSGFGGGGGGSGIAGR_	S(0.837)GS(0.145)GVS(0.009)LS(0.009)GFGGGGGGSGIAGR
gi|472580581	RHTO_06413	297	hypothetical protein	1	S	VEMTFGSSTSRARSGSGVSLSGFGGGGGGSG	X;X;X;X;X;X;X;X;X;X;X;X;X;X;X;Phospho (STY);X;X;X;X;X;X;X;X;X;X;X;X;X;X;X	XXXXXXXXXXXXXPPPPPPPPPPPPPPPPPP	0.00180151	88.264	74.618	_SGS(ph)GVSLSGFGGGGGGSGIAGR_	S(0.138)GS(0.688)GVS(0.036)LS(0.138)GFGGGGGGSGIAGR
gi|472580581	RHTO_06413	319	hypothetical protein	1	S	FGGGGGGSGIAGRERSGSSATIVPK______	X;X;X;X;X;X;X;X;X;X;X;X;X;X;X;Phospho (STY);X;X;X;X;X;X;X;X;X;X;X;X;X;X;X	XXXXXXXXXXXXXXXPPPPPPPPPPXXXXXX	0.0085945	95.477	95.477	_S(ph)GSSATIVPK_	S(0.979)GS(0.01)S(0.01)ATIVPK
gi|472580584	RHTO_06416	98	pre-mRNA-splicing factor 18	1;2;3	S	REGSVGAGGTPKRARSTSATPDPASLSTKLH	X;X;X;X;X;X;X;X;X;X;X;X;X;X;X;Phospho (STY);Phospho (STY);Phospho (STY);X;Phospho (STY);X;X;X;X;X;X;Phospho (STY);X;X;X;X	XXXXXXXXXXXXPPPPPPPPPPPPPPPPPXX	3.48e-38	208.63	85.002	_RARS(ph)TSAT(ph)PDPASLS(ph)TK_	RARS(0.989)T(0.029)S(0.324)AT(0.662)PDPAS(0.412)LS(0.546)T(0.039)K
gi|472580584	RHTO_06416	100	pre-mRNA-splicing factor 18	1;2;3	S	GSVGAGGTPKRARSTSATPDPASLSTKLHVA	X;X;X;X;X;X;X;X;X;X;X;X;X;Phospho (STY);Phospho (STY);Phospho (STY);X;Phospho (STY);X;X;X;X;X;X;X;X;X;X;X;X;X	XXXXXXXXXXPPPPPPPPPPPPPPPPPXXXX	4.49e-125	208.63	208.63	_ARS(ph)TS(ph)ATPDPASLSTK_	ARS(0.984)T(0.016)S(0.999)ATPDPASLSTK
gi|472580584	RHTO_06416	17	pre-mRNA-splicing factor 18	2;3	S	DWLKQEIASKKRQLESLSPSPSPHPTDSAAS	X;X;X;X;X;X;X;X;X;X;X;X;X;X;X;Phospho (STY);X;X;X;Phospho (STY);X;Phospho (STY);X;X;X;X;X;X;X;X;X	XXXXXXXXXXXXPPPPPPPPPPPPPPPPPPP	0.000528621	65.901	50.583	_QLES(ph)LSPSPS(ph)PHPTDSAASTSTEPPKK_	QLES(0.767)LS(0.221)PS(0.135)PS(0.546)PHPT(0.091)DS(0.092)AAS(0.061)T(0.059)S(0.015)T(0.015)EPPKK
gi|472580584	RHTO_06416	19	pre-mRNA-splicing factor 18	2;3	S	LKQEIASKKRQLESLSPSPSPHPTDSAASTS	X;X;X;X;X;X;X;X;X;X;X;X;X;X;X;Phospho (STY);X;Phospho (STY);X;Phospho (STY);X;X;X;X;X;X;X;X;X;X;X	XXXXXXXXXXPPPPPPPPPPPPPPPPPPPPP	2.49e-05	90.559	69.521	_QLESLS(ph)PS(ph)PSPHPTDSAASTSTEPPKK_	QLES(0.019)LS(0.974)PS(0.857)PS(0.096)PHPT(0.041)DS(0.01)AAS(0.001)T(0.001)STEPPKK
gi|472580584	RHTO_06416	21	pre-mRNA-splicing factor 18	2;3	S	QEIASKKRQLESLSPSPSPHPTDSAASTSTE	X;X;X;X;X;X;X;X;X;X;X;Phospho (STY);X;Phospho (STY);X;Phospho (STY);X;Phospho (STY);X;X;X;X;X;X;X;X;X;X;X;X;X	XXXXXXXXPPPPPPPPPPPPPPPPPPPPPPP	1.52e-05	91.733	90.559	_QLESLS(ph)PS(ph)PS(ph)PHPTDSAASTSTEPPKK_	QLES(0.048)LS(0.963)PS(0.99)PS(0.996)PHPT(0.002)DSAASTSTEPPKK
gi|472580584	RHTO_06416	23	pre-mRNA-splicing factor 18	2;3	S	IASKKRQLESLSPSPSPHPTDSAASTSTEPP	X;X;X;X;X;X;X;X;X;Phospho (STY);X;Phospho (STY);X;Phospho (STY);X;Phospho (STY);X;X;X;X;X;X;X;X;X;X;X;X;X;X;X	XXXXXXPPPPPPPPPPPPPPPPPPPPPPPPP	1.52e-05	91.733	90.559	_QLESLS(ph)PS(ph)PS(ph)PHPTDSAASTSTEPPKK_	QLES(0.048)LS(0.963)PS(0.99)PS(0.996)PHPT(0.002)DSAASTSTEPPKK
gi|472580584	RHTO_06416	234	pre-mRNA-splicing factor 18	1	S	AAKDVSRSATPAQAGSAGEDVDSSADKKEPN	X;X;X;X;X;X;X;X;X;X;X;X;X;X;X;Phospho (STY);X;X;X;X;X;X;X;X;X;X;X;X;X;X;X	XXXXXXXPPPPPPPPPPPPPPPPPPPPPPPP	1.37e-05	82.65	82.65	_SATPAQAGS(ph)AGEDVDSSADKKEPNPK_	S(0.006)AT(0.026)PAQAGS(0.968)AGEDVDSSADKKEPNPK
gi|472580590	RHTO_06422	880	YT521-B-like splicing factor	1	S	LPPDVAAQAKQRRAASFDVAPTKVGDVQRPT	X;X;X;X;X;X;X;X;X;X;X;X;X;X;X;Phospho (STY);X;X;X;X;X;X;X;X;X;X;X;X;X;X;X	XXXXXXXXXXXXPPPPPPPPPPPXXXXXXXX	0.00177336	114.7	114.7	_AAS(ph)FDVAPTK_	AAS(1)FDVAPTK
gi|472580590	RHTO_06422	388	YT521-B-like splicing factor	1	S	QQQRAPPPPAPAQRPSPDPGESEIAYPISAR	X;X;X;X;X;X;X;X;X;X;X;X;X;X;X;Phospho (STY);X;X;X;X;X;X;X;X;X;X;X;X;X;X;X	XXXXPPPPPPPPPPPPPPPPPPPPPPPPPPP	0.00296053	69.704	69.704	_APPPPAPAQRPS(ph)PDPGESEIAYPISAR_	APPPPAPAQRPS(1)PDPGESEIAYPISAR
gi|472580591	RHTO_06423	192	VanZ-like domain protein	2	S	RERELRRLYDELGEMSESEGEEEEGLIGARE	X;X;X;X;X;X;X;X;X;X;X;X;X;X;Oxidation (M);Phospho (STY);X;Phospho (STY);X;X;X;X;X;X;X;X;X;X;X;X;X	XXXXXXPPPPPPPPPPPPPPPPPPPPPPPPX	1.59e-14	133.84	133.84	_RLYDELGEM(ox)S(ph)ES(ph)EGEEEEGLIGAR_	RLYDELGEMS(1)ES(1)EGEEEEGLIGAR
gi|472580591	RHTO_06423	194	VanZ-like domain protein	2	S	RELRRLYDELGEMSESEGEEEEGLIGAREER	X;X;X;X;X;X;X;X;X;X;X;X;Oxidation (M);Phospho (STY);X;Phospho (STY);X;X;X;X;X;X;X;X;X;X;X;X;X;X;X	XXXXPPPPPPPPPPPPPPPPPPPPPPPPXXX	1.59e-14	133.84	133.84	_RLYDELGEM(ox)S(ph)ES(ph)EGEEEEGLIGAR_	RLYDELGEMS(1)ES(1)EGEEEEGLIGAR
gi|472580602	RHTO_06434	382	conserved hypothetical protein	1	S	TSQTPADADAKDFDDSDDETDELYFERRSSV	X;X;X;X;X;X;X;X;X;X;X;X;X;X;X;Phospho (STY);X;X;X;X;X;X;X;X;X;X;X;X;X;X;X	PPPPPPPPPPPPPPPPPPPPPPPPPPPXXXX	0.00794747	61.89	61.89	_SAPAATSQTPADADAKDFDDS(ph)DDETDELYFER_	SAPAATSQT(0.002)PADADAKDFDDS(0.807)DDET(0.189)DELY(0.002)FER
gi|472580605	RHTO_06437	7	condensin complex subunit 2	1	S	_________MPRRAPSPSSRRRSSLPSQPST	X;X;X;X;X;X;X;X;X;X;X;X;X;X;X;Phospho (STY);X;X;X;X;X;X;Phospho (STY);Phospho (STY);X;X;X;X;X;X;X	XXXXXXXXXXXXPPPPPPPPXXXXXXXXXXX	0.0109811	72.531	72.531	_RAPS(ph)PSSR_	RAPS(0.797)PS(0.201)S(0.002)R
gi|472580605	RHTO_06437	14	condensin complex subunit 2	1;2	S	__MPRRAPSPSSRRRSSLPSQPSTPRASLTH	X;X;X;X;X;X;X;X;Phospho (STY);X;X;X;X;X;X;Phospho (STY);Phospho (STY);X;X;X;X;X;X;X;X;X;X;X;X;X;X	XXXXXXXXXXXXXPPPPPPPPPPPPPXXXXX	0.00764149	111.64	78.285	_RRS(ph)S(ph)LPSQPSTPR_	RRS(1)S(1)LPSQPSTPR
gi|472580605	RHTO_06437	15	condensin complex subunit 2	1;2	S	_MPRRAPSPSSRRRSSLPSQPSTPRASLTHP	X;X;X;X;X;X;X;Phospho (STY);X;X;X;X;X;X;Phospho (STY);Phospho (STY);X;X;X;X;X;X;X;X;X;X;X;X;X;X;X	XXXXXXXXXXXXPPPPPPPPPPPPPXXXXXX	0.00764149	111.64	78.285	_RRS(ph)S(ph)LPSQPSTPR_	RRS(1)S(1)LPSQPSTPR
gi|472580616	RHTO_06448	385	hypothetical protein	1	S	NLPSPSLAPSQPSRRSSRPPGGEADQAAAAA	X;X;X;X;X;X;X;X;X;X;X;X;X;X;X;Phospho (STY);X;X;X;X;X;X;X;X;X;X;X;X;X;X;X	XXXXXXXXXXXXXXPPPPPPPPPPPPPPPPP	0.00232412	61.437	61.437	_RS(ph)SRPPGGEADQAAAAAAAAEAAAR_	RS(0.5)S(0.5)RPPGGEADQAAAAAAAAEAAAR
gi|472580616	RHTO_06448	386	hypothetical protein	1	S	LPSPSLAPSQPSRRSSRPPGGEADQAAAAAA	X;X;X;X;X;X;X;X;X;X;X;X;X;X;X;Phospho (STY);X;X;X;X;X;X;X;X;X;X;X;X;X;X;X	XXXXXXXXXXXXXPPPPPPPPPPPPPPPPPP	6.89e-05	83.647	83.647	_RSS(ph)RPPGGEADQAAAAAAAAEAAAR_	RS(0.196)S(0.804)RPPGGEADQAAAAAAAAEAAAR
gi|472580630	RHTO_05945	157	actin-related protein 8	1	S	RRPAREGGATQGRETSPSSASDPLSRTLVIH	X;X;X;X;X;X;X;X;X;X;X;X;X;X;X;Phospho (STY);X;X;X;X;X;X;X;X;X;X;X;X;X;X;X	XXXXXPPPPPPPPPPPPPPPPPPPPPXXXXX	0.00288194	114.69	59.862	_ETS(ph)PSSASDPLSR_	ET(0.024)S(0.971)PS(0.003)S(0.001)AS(0.001)DPLSR
gi|472580636	RHTO_05951	368	hypothetical protein	2	S	PSPLWQVSQTDAPTPSPPRNTASIKPSTRAA	X;X;X;X;X;X;X;X;X;X;X;X;X;Phospho (STY);X;Phospho (STY);X;X;X;X;X;X;X;X;X;X;X;X;X;X;X	PPPPPPPPPPPPPPPPPPPXXXXXXXXXXXX	0.00639307	72.564	72.564	_AAATPAKPSPLWQVSQTDAPT(ph)PS(ph)PPR_	AAATPAKPSPLWQVSQTDAPT(1)PS(1)PPR
gi|472580648	RHTO_05963	657	pre-mRNA cleavage complex 2 protein Pcf11	1	S	SRESTPLASRKRKADSVGPSPVKQEHDAGAG	X;X;X;X;X;X;X;X;X;X;X;X;X;X;X;Phospho (STY);X;X;X;X;X;X;X;X;X;X;X;X;X;X;X	XXXXXXXXXXXXPPPPPPPPPPPPPPPPPPP	0.00595313	64.295	64.295	_KADS(ph)VGPSPVKQEHDAGAGVGEFAR_	KADS(0.99)VGPS(0.01)PVKQEHDAGAGVGEFAR
gi|472580651	RHTO_05966	797	conserved hypothetical protein	1;2	S	LLAPRQSFAPGSRSASPSLSARSRSPSPGVG	X;X;X;X;X;X;X;X;X;X;X;X;X;X;X;Phospho (STY);X;Phospho (STY);X;X;X;X;Phospho (STY);X;Phospho (STY);X;Phospho (STY);X;X;X;X	XXXXXPPPPPPPPPPPPPPPPPXXXXXXXXX	0.000121659	115.39	115.29	_SAS(ph)PSLSAR_	SAS(0.998)PS(0.002)LSAR
gi|472580651	RHTO_05966	799	conserved hypothetical protein	1;2	S	APRQSFAPGSRSASPSLSARSRSPSPGVGVA	X;X;X;X;X;X;X;X;X;X;X;X;X;Phospho (STY);X;Phospho (STY);X;X;X;X;Phospho (STY);X;Phospho (STY);X;Phospho (STY);X;X;X;X;X;X	XXXPPPPPPPPPPPPPPPPPXXXXXXXXXXX	0.000121659	134.49	134.49	_SASPS(ph)LSAR_	SAS(0.018)PS(0.961)LS(0.021)AR
gi|472580651	RHTO_05966	801	conserved hypothetical protein	1	S	RQSFAPGSRSASPSLSARSRSPSPGVGVAGS	X;X;X;X;X;X;X;X;X;X;X;X;X;X;X;Phospho (STY);X;X;Phospho (STY);X;Phospho (STY);X;Phospho (STY);X;X;X;X;X;X;X;X	XXXXXXXXXPPPPPPPPPXXXXXXXXXXXXX	0.0094537	109.72	109.72	_SASPSLS(ph)AR_	SASPS(0.036)LS(0.964)AR
gi|472580651	RHTO_05966	804	conserved hypothetical protein	2;3	S	FAPGSRSASPSLSARSRSPSPGVGVAGSIEG	X;X;X;X;X;X;X;X;Phospho (STY);X;Phospho (STY);X;Phospho (STY);X;X;Phospho (STY);X;Phospho (STY);X;Phospho (STY);X;X;X;X;X;X;X;X;X;X;X	XXXXXXXXXXXXXXXPPPPPPPPPPPPPPPP	0.00506529	95.926	95.926	_S(ph)RS(ph)PS(ph)PGVGVAGSIEGR_	S(1)RS(1)PS(1)PGVGVAGSIEGR
gi|472580651	RHTO_05966	806	conserved hypothetical protein	2;3	S	PGSRSASPSLSARSRSPSPGVGVAGSIEGRQ	X;X;X;X;X;X;Phospho (STY);X;Phospho (STY);X;Phospho (STY);X;X;Phospho (STY);X;Phospho (STY);X;Phospho (STY);X;X;X;X;X;X;X;X;X;X;X;X;X	XXXXXXXXXXXXXPPPPPPPPPPPPPPPPPX	5e-10	145.61	95.926	_S(ph)RS(ph)PS(ph)PGVGVAGSIEGR_	S(1)RS(1)PS(1)PGVGVAGSIEGR
gi|472580651	RHTO_05966	808	conserved hypothetical protein	2;3	S	SRSASPSLSARSRSPSPGVGVAGSIEGRQGW	X;X;X;X;Phospho (STY);X;Phospho (STY);X;Phospho (STY);X;X;Phospho (STY);X;Phospho (STY);X;Phospho (STY);X;X;X;X;X;X;X;X;X;X;X;X;X;X;X	XXXXXXXXXXXPPPPPPPPPPPPPPPPPXXX	5e-10	145.61	95.926	_S(ph)RS(ph)PS(ph)PGVGVAGSIEGR_	S(1)RS(1)PS(1)PGVGVAGSIEGR
gi|472580652	RHTO_05967	38	hypothetical protein	1	S	HDGTGASSSGMSRGLSSSGLNPRTSPTVSQK	X;X;X;X;X;X;X;X;X;X;X;X;X;X;X;Phospho (STY);X;X;X;X;X;X;X;X;X;X;X;X;X;X;X	XXXXXXXXXXXXXPPPPPPPPPPXXXXXXXX	7.05e-23	186.76	166.7	_GLS(ph)SSGLNPR_	GLS(0.998)S(0.002)SGLNPR
gi|472580652	RHTO_05967	156	hypothetical protein	1	S	EKERVRQAAAGVGAKSPRGGGRGRIQRRRLY	X;X;X;X;X;X;X;X;X;X;X;X;X;X;X;Phospho (STY);X;X;X;X;X;X;X;X;X;X;X;X;X;X;X	XXXXXXPPPPPPPPPPPPXXXXXXXXXXXXX	0.00570446	96.489	70.47	_QAAAGVGAKS(ph)PR_	QAAAGVGAKS(1)PR
gi|472580657	RHTO_05972	835	actin patch protein	1	S	PAVSYATYKSARRADSLATPVADPAASTETP	X;X;X;X;X;X;X;X;X;X;X;X;X;X;X;Phospho (STY);X;X;X;X;X;X;X;X;X;X;X;X;X;X;X	XXXXXXXXXXXXPPPPPPPPPPPPPPPPPPP	4.52e-09	113.42	113.42	_RADS(ph)LATPVADPAASTETPSTPLAPPK_	RADS(0.794)LAT(0.206)PVADPAASTETPSTPLAPPK
gi|472580657	RHTO_05972	916	actin patch protein	1	S	QWDGSHERPVPVRRTSGSEVTLKTSGREPST	X;X;X;X;X;X;X;X;X;X;X;X;X;X;X;Phospho (STY);X;X;X;X;X;X;X;X;X;X;X;X;X;X;X	XXXXXXXXXXXXXPPPPPPPPPPXXXXXXXX	0.00313324	115.06	62.891	_RTS(ph)GSEVTLK_	RT(0.141)S(0.809)GS(0.025)EVT(0.025)LK
gi|472580662	RHTO_05977	602	ARF guanyl-nucleotide exchange factor	1	S	APAEQASSEVKGPAESPQQLFRHLASTSKAP	X;X;X;X;X;X;X;X;X;X;X;X;X;X;X;Phospho (STY);X;X;X;X;X;X;X;X;X;X;X;X;X;X;X	PPPPPPPPPPPPPPPPPPPPPPXXXXXXXXX	1.26e-13	185.95	185.95	_GPAES(ph)PQQLFR_	GPAES(1)PQQLFR
gi|472580662	RHTO_05977	33	ARF guanyl-nucleotide exchange factor		S	ATLRRAASTRTAGSPSPSSPSASPSSSPRPR	X;Phospho (STY);X;X;X;X;X;X;X;X;X;X;X;X;X;Phospho (STY);X;X;X;X;X;X;X;X;X;X;X;X;X;X;X	XXXXXXXXXXPPPPPPPPPPPPPPPPPPPPP	0.00278475	70.783	70.783	_TAGSPS(ph)PSSPSASPSSSPRPR_	T(0.001)AGS(0.058)PS(0.329)PS(0.273)S(0.273)PS(0.064)AS(0.002)PSSSPRPR
gi|472580663	RHTO_05978	155	conserved hypothetical protein	2	S	LTSKLASTSKELSSLSPSSSPSTRQKLTDSA	X;X;X;X;X;X;X;X;X;X;X;X;X;X;X;Phospho (STY);X;Phospho (STY);X;Phospho (STY);X;X;X;X;X;X;X;X;X;X;X	XXXXXXXXXXPPPPPPPPPPPPPPXXXXXXX	5.8e-05	107.41	107.41	_ELSSLS(ph)PS(ph)SSPSTR_	ELS(0.03)S(0.057)LS(0.885)PS(0.688)S(0.152)S(0.188)PSTR
gi|472580663	RHTO_05978	157	conserved hypothetical protein	2	S	SKLASTSKELSSLSPSSSPSTRQKLTDSASI	X;X;X;X;X;X;X;X;X;X;X;X;X;Phospho (STY);X;Phospho (STY);X;X;X;X;X;X;X;X;X;X;X;X;X;X;X	XXXXXXXXPPPPPPPPPPPPPPXXXXXXXXX	5.8e-05	107.41	107.41	_ELSSLS(ph)PS(ph)SSPSTR_	ELS(0.03)S(0.057)LS(0.885)PS(0.688)S(0.152)S(0.188)PSTR
gi|472580663	RHTO_05978	158	conserved hypothetical protein	2	S	KLASTSKELSSLSPSSSPSTRQKLTDSASIL	X;X;X;X;X;X;X;X;X;X;X;X;X;X;X;Phospho (STY);Phospho (STY);X;X;X;X;X;X;X;X;X;X;X;X;X;X	XXXXXXXPPPPPPPPPPPPPPXXXXXXXXXX	0.000691286	141.13	141.13	_ELSSLSPSS(ph)S(ph)PSTR_	ELSSLS(0.219)PS(0.34)S(0.659)S(0.77)PS(0.01)T(0.002)R
gi|472580663	RHTO_05978	159	conserved hypothetical protein	2	S	LASTSKELSSLSPSSSPSTRQKLTDSASILE	X;X;X;X;X;X;X;X;X;X;X;Phospho (STY);X;X;Phospho (STY);Phospho (STY);X;X;X;X;X;X;X;X;X;X;X;X;X;X;X	XXXXXXPPPPPPPPPPPPPPXXXXXXXXXXX	0.000691286	141.13	141.13	_ELSSLSPSS(ph)S(ph)PSTR_	ELSSLS(0.219)PS(0.34)S(0.659)S(0.77)PS(0.01)T(0.002)R
gi|472580681	RHTO_05996	149	P-type ATPase, cation transport	1;2	S	RRRRSSSRRSRSRRGSDATSASEAVTTDAES	X;X;X;X;X;X;X;X;X;X;X;X;X;X;X;Phospho (STY);X;X;Phospho (STY);X;X;Phospho (STY);X;X;X;X;X;X;X;X;Phospho (STY)	XXXXXXXXXXXXXPPPPPPPPPPPPPPPPPP	3.52e-26	159.36	141.64	_RGS(ph)DATSASEAVTTDAES(ph)VHSR_	RGS(0.979)DAT(0.006)S(0.012)AS(0.003)EAVTTDAES(1)VHSR
gi|472580681	RHTO_05996	153	P-type ATPase, cation transport	2	S	SSSRRSRSRRGSDATSASEAVTTDAESVHSR	X;X;X;X;X;X;X;X;X;X;X;X;X;X;Phospho (STY);Phospho (STY);X;X;X;X;X;X;X;X;X;X;X;X;X;X;X	XXXXXXXXXPPPPPPPPPPPPPPPPPPPPPP	0.00565487	73.783	73.783	_RGSDAT(ph)S(ph)ASEAVTTDAESVHSR_	RGS(0.521)DAT(0.703)S(0.696)AS(0.08)EAVTTDAESVHSR
gi|472580681	RHTO_05996	155	P-type ATPase, cation transport	2	S	SRRSRSRRGSDATSASEAVTTDAESVHSRYS	X;X;X;X;X;X;X;X;X;Phospho (STY);X;X;X;X;X;Phospho (STY);X;X;X;X;X;X;X;X;X;X;X;X;X;X;X	XXXXXXXPPPPPPPPPPPPPPPPPPPPPPXX	0.000340896	84.166	84.166	_RGS(ph)DATSAS(ph)EAVTTDAESVHSR_	RGS(0.767)DAT(0.309)S(0.283)AS(0.641)EAVTTDAESVHSR
gi|472580681	RHTO_05996	164	P-type ATPase, cation transport	1;2	S	SDATSASEAVTTDAESVHSRYSTSRNRRRRT	Phospho (STY);X;X;X;X;X;X;X;X;X;X;X;X;X;X;Phospho (STY);X;X;X;X;X;X;X;X;X;X;X;X;X;X;X	PPPPPPPPPPPPPPPPPPPPXXXXXXXXXXX	4.54e-13	141.64	141.64	_RGS(ph)DATSASEAVTTDAES(ph)VHSR_	RGS(0.979)DAT(0.006)S(0.012)AS(0.003)EAVTTDAES(1)VHSR
gi|472580681	RHTO_05996	1211	P-type ATPase, cation transport	3;4	S	TLDPYSLKVVVERDDSSVFSGYSSERREYHL	X;X;X;X;X;X;X;X;X;X;X;X;X;X;X;Phospho (STY);Phospho (STY);X;X;Phospho (STY);X;Phospho (STY);Phospho (STY);Phospho (STY);X;X;X;X;X;X;X	XXXXXXXXPPPPPPPPPPPPPPPPPPPXXXX	0.00220422	104.14	102.78	_VVVERDDS(ph)S(ph)VFS(ph)GYS(ph)SERR_	VVVERDDS(1)S(1)VFS(0.978)GY(0.073)S(0.599)S(0.349)ERR
gi|472580681	RHTO_05996	1212	P-type ATPase, cation transport	2;3;4	S	LDPYSLKVVVERDDSSVFSGYSSERREYHLA	X;X;X;X;X;X;X;X;X;X;X;X;X;X;Phospho (STY);Phospho (STY);X;X;Phospho (STY);X;Phospho (STY);Phospho (STY);Phospho (STY);X;X;X;X;X;X;X;X	XXXXXXXPPPPPPPPPPPPPPPPPPPXXXXX	4.01e-07	129.5	102.78	_VVVERDDS(ph)S(ph)VFS(ph)GYS(ph)SERR_	VVVERDDS(1)S(1)VFS(0.978)GY(0.073)S(0.599)S(0.349)ERR
gi|472580681	RHTO_05996	1215	P-type ATPase, cation transport	3;4	S	YSLKVVVERDDSSVFSGYSSERREYHLAVTG	X;X;X;X;X;X;X;X;X;X;X;Phospho (STY);Phospho (STY);X;X;Phospho (STY);X;X;Phospho (STY);Phospho (STY);X;X;X;X;X;X;X;X;X;X;X	XXXXPPPPPPPPPPPPPPPPPPPXXXXXXXX	4.01e-07	129.5	129.5	_VVVERDDSS(ph)VFS(ph)GYSS(ph)ERR_	VVVERDDS(0.039)S(0.962)VFS(0.99)GY(0.016)S(0.014)S(0.98)ERR
gi|472580681	RHTO_05996	1218	P-type ATPase, cation transport	3;4	S	KVVVERDDSSVFSGYSSERREYHLAVTGDVF	X;X;X;X;X;X;X;X;Phospho (STY);Phospho (STY);X;X;Phospho (STY);X;X;Phospho (STY);X;X;X;X;X;X;X;X;X;X;X;X;X;X;X	XPPPPPPPPPPPPPPPPPPPXXXXXXXXXXX	0.00220422	102.78	69.152	_VVVERDDS(ph)S(ph)VFS(ph)GYS(ph)SERR_	VVVERDDS(0.998)S(0.998)VFS(0.984)GY(0.035)S(0.841)S(0.143)ERR
gi|472580681	RHTO_05996	1219	P-type ATPase, cation transport	3;4	S	VVVERDDSSVFSGYSSERREYHLAVTGDVFR	X;X;X;X;X;X;X;Phospho (STY);Phospho (STY);X;X;Phospho (STY);X;Phospho (STY);X;Phospho (STY);X;X;X;X;X;X;X;X;X;X;X;X;X;X;X	PPPPPPPPPPPPPPPPPPPXXXXXXXXXXXX	4.01e-07	129.5	104.14	_VVVERDDS(ph)SVFSGY(ph)SS(ph)ERR_	VVVERDDS(0.457)S(0.502)VFS(0.326)GY(0.491)S(0.232)S(0.993)ERR
gi|472580700	RHTO_05875	48	transcription initiation factor TFIID component TAF4	1	S	TRGRGAGGAPGGRGASADPEGGAGNAAESAR	X;X;X;X;X;X;X;X;X;X;X;X;X;X;X;Phospho (STY);X;X;X;X;X;X;X;X;X;X;X;X;X;X;X	XXXXPPPPPPPPPPPPPPPPPPPPPPPPPPP	0.000330671	79.445	79.445	_GAGGAPGGRGAS(ph)ADPEGGAGNAAESAR_	GAGGAPGGRGAS(1)ADPEGGAGNAAESAR
gi|472580700	RHTO_05875	105	transcription initiation factor TFIID component TAF4	1	S	ATNERQHAQAMAAQQSQGGYSAADRSRMQDL	X;X;X;X;X;X;X;X;X;X;Oxidation (M);X;X;X;X;Phospho (STY);X;X;X;X;X;X;X;X;X;X;X;X;X;X;X	XXXXXPPPPPPPPPPPPPPPPPPPPXXXXXX	0.00215836	76.586	76.586	_QHAQAM(ox)AAQQS(ph)QGGYSAADR_	QHAQAMAAQQS(0.813)QGGY(0.176)S(0.011)AADR
gi|472580708	RHTO_05883	324	T-complex protein 1 subunit eta	1	S	QYFADRNIFCAGRVASDDLKRVVSAVGGAIQ	X;X;X;X;X;X;X;X;X;X;X;X;X;X;X;Phospho (STY);X;X;X;X;X;X;X;X;X;X;X;X;X;X;X	XXXXXXXXXXXXXPPPPPPPPXXXXXXXXXX	0.00737435	79.148	79.148	_VAS(ph)DDLKR_	VAS(1)DDLKR
gi|472580712	RHTO_05887	713	kinesin family member 1/13/14	1	S	LDSVTEDGDDDDEDSSDFRSRLYSGGTWTTD	X;X;X;X;X;X;X;X;X;X;X;X;X;X;X;Phospho (STY);X;X;X;X;X;X;X;X;X;X;X;X;X;X;X	PPPPPPPPPPPPPPPPPPPXXXXXXXXXXXX	8.41e-11	124.25	124.25	_M(ox)SFLDSVTEDGDDDDEDSS(ph)DFR_	MSFLDSVTEDGDDDDEDS(0.49)S(0.51)DFR
gi|472580722	RHTO_05897	141	transcription initiation factor TFIID subunit 1	2	S	RTRVKDEPMDDALFGSPSPAPAQHQPMEVEK	X;X;X;X;X;X;X;X;Oxidation (M);X;X;X;X;X;X;Phospho (STY);X;Phospho (STY);X;X;X;X;X;X;X;X;Oxidation (M);X;X;X;X	XXXPPPPPPPPPPPPPPPPPPPPPPPPPPPP	1.57e-08	98.121	98.121	_VKDEPM(ox)DDALFGS(ph)PS(ph)PAPAQHQPM(ox)EVEK_	VKDEPMDDALFGS(1)PS(1)PAPAQHQPMEVEK
gi|472580722	RHTO_05897	143	transcription initiation factor TFIID subunit 1	2	S	RVKDEPMDDALFGSPSPAPAQHQPMEVEKLA	X;X;X;X;X;X;Oxidation (M);X;X;X;X;X;X;Phospho (STY);X;Phospho (STY);X;X;X;X;X;X;X;X;Oxidation (M);X;X;X;X;X;X	XPPPPPPPPPPPPPPPPPPPPPPPPPPPPXX	1.57e-08	98.121	98.121	_VKDEPM(ox)DDALFGS(ph)PS(ph)PAPAQHQPM(ox)EVEK_	VKDEPMDDALFGS(1)PS(1)PAPAQHQPMEVEK
gi|472580726	RHTO_05901	218	Src homology-3 domain containing protein	1	S	PRIPEDADPDPIAVGSSPRRASQVDTSGWTQ	X;X;X;X;X;X;X;X;X;X;X;X;X;X;X;Phospho (STY);X;X;X;X;X;X;X;X;X;X;X;X;X;X;X	XXPPPPPPPPPPPPPPPPPPXXXXXXXXXXX	0.012264	61.087	61.087	_IPEDADPDPIAVGS(ph)SPRR_	IPEDADPDPIAVGS(0.5)S(0.5)PRR
gi|472580726	RHTO_05901	219	Src homology-3 domain containing protein	1	S	RIPEDADPDPIAVGSSPRRASQVDTSGWTQL	X;X;X;X;X;X;X;X;X;X;X;X;X;X;X;X;X;X;X;X;X;X;X;X;X;X;X;X;X;X;X	XXXXXXXXXXXXXXXXXXXXXXXXXXXXXXX	0.012264	61.087	61.087	_IPEDADPDPIAVGS(ph)SPRR_	IPEDADPDPIAVGS(0.5)S(0.5)PRR
gi|472580727	RHTO_05902	364	glycosyltransferase family 2 protein	1	S	TEVFGPGGTYEGRASSLSGEAGLPPYSRRQD	X;X;X;X;X;X;X;X;X;X;X;X;X;X;X;Phospho (STY);X;X;X;X;X;X;X;X;X;X;X;X;X;X;X	XXXXXXXXXXXXXPPPPPPPPPPPPPPPXXX	0.010221	89.468	89.468	_ASS(ph)LSGEAGLPPYSR_	AS(0.179)S(0.817)LS(0.004)GEAGLPPYSR
gi|472580727	RHTO_05902	177	glycosyltransferase family 2 protein	1	S	TSTPPHTPVRIKRDASAERAPPVPTPQDEDD	X;X;Phospho (STY);X;X;X;X;X;X;X;X;X;X;X;X;Phospho (STY);X;X;X;X;X;X;X;X;X;X;X;X;X;X;X	XXXXXXXXXXXXXPPPPPPPPPPPPPPPPPP	2.57e-47	169.7	169.7	_DAS(ph)AERAPPVPTPQDEDDIATLNFNR_	DAS(1)AERAPPVPTPQDEDDIATLNFNR
gi|472580747	RHTO_05922	319	histidine kinase		S	YTSLPRRRLSTDARPSSPTPSEPKSEHDKFP	X;X;X;X;X;X;X;X;X;X;X;X;X;X;X;Phospho (STY);X;X;X;X;X;X;X;X;X;X;X;X;X;X;X	XXXXXXXXPPPPPPPPPPPPPPPPXXXXXXX	0.0102677	68.944	68.944	_LSTDARPS(ph)SPTPSEPK_	LSTDARPS(0.461)S(0.461)PT(0.066)PS(0.013)EPK
gi|472580747	RHTO_05922	320	histidine kinase		S	TSLPRRRLSTDARPSSPTPSEPKSEHDKFPP	X;X;X;X;X;X;X;X;X;X;X;X;X;X;X;X;X;X;X;X;X;X;X;X;X;X;X;X;X;X;X	XXXXXXXXXXXXXXXXXXXXXXXXXXXXXXX	0.0102677	68.944	68.944	_LSTDARPS(ph)SPTPSEPK_	LSTDARPS(0.461)S(0.461)PT(0.066)PS(0.013)EPK
gi|472580749	RHTO_05924	317	AMP-activated protein kinase beta subunit, carbohydrate-Binding Module Family 48 protein, glycogen-binding		S	EETQTPMQERRELQPSSSSVDGGSGSAGSST	X;X;X;X;X;X;X;X;X;X;X;X;X;X;X;Phospho (STY);X;X;X;X;X;X;X;X;X;X;X;X;X;X;X	XXXXXXXXXXPPPPPPPPPPPPPPPPPPPPP	0.0010785	66.467	66.467	_RELQPS(ph)SSSVDGGSGSAGSSTPSR_	RELQPS(0.487)S(0.156)S(0.156)S(0.2)VDGGS(0.001)GS(0.001)AGSSTPSR
gi|472580749	RHTO_05924	318	AMP-activated protein kinase beta subunit, carbohydrate-Binding Module Family 48 protein, glycogen-binding		S	ETQTPMQERRELQPSSSSVDGGSGSAGSSTP	X;X;X;X;X;X;X;X;X;X;X;X;X;X;X;Phospho (STY);X;X;X;X;X;X;X;X;X;X;X;X;X;X;X	XXXXXXXXXPPPPPPPPPPPPPPPPPPPPPP	0.000150496	77.287	77.287	_RELQPSS(ph)SSVDGGSGSAGSSTPSR_	RELQPS(0.041)S(0.318)S(0.318)S(0.318)VDGGS(0.001)GS(0.003)AGSSTPSR
gi|472580749	RHTO_05924	319	AMP-activated protein kinase beta subunit, carbohydrate-Binding Module Family 48 protein, glycogen-binding		S	TQTPMQERRELQPSSSSVDGGSGSAGSSTPS	X;X;X;X;X;X;X;X;X;X;X;X;X;X;X;X;X;X;X;X;X;X;X;X;X;X;X;X;X;X;X	XXXXXXXXXXXXXXXXXXXXXXXXXXXXXXX	0.000150496	77.287	77.287	_RELQPSS(ph)SSVDGGSGSAGSSTPSR_	RELQPS(0.041)S(0.318)S(0.318)S(0.318)VDGGS(0.001)GS(0.003)AGSSTPSR
gi|472580749	RHTO_05924	320	AMP-activated protein kinase beta subunit, carbohydrate-Binding Module Family 48 protein, glycogen-binding		S	QTPMQERRELQPSSSSVDGGSGSAGSSTPSR	X;X;X;X;X;X;X;X;X;X;X;X;X;X;X;X;X;X;X;X;X;X;X;X;X;X;X;X;X;X;X	XXXXXXXXXXXXXXXXXXXXXXXXXXXXXXX	0.000150496	77.287	77.287	_RELQPSS(ph)SSVDGGSGSAGSSTPSR_	RELQPS(0.041)S(0.318)S(0.318)S(0.318)VDGGS(0.001)GS(0.003)AGSSTPSR
gi|472580751	RHTO_05926	34	myosin regulatory light chain 9	1	S	RPSSGKARRSHPRESSGAYQLFDAKQVQVFR	X;X;X;X;X;X;X;X;X;X;X;X;X;X;X;Phospho (STY);X;X;X;X;X;X;X;X;X;X;X;X;X;X;X	XXXXXXXXXXXXXPPPPPPPPPPPPXXXXXX	0.000229473	124.46	124.46	_ESS(ph)GAYQLFDAK_	ES(0.013)S(0.987)GAYQLFDAK
gi|472580760	RHTO_05935	265	cyclin c	1	S	APRPGGGPATRTRRQSQDASNNPSALTTTSS	X;X;X;X;X;X;X;X;X;X;X;X;X;X;X;Phospho (STY);X;X;X;X;X;X;X;X;X;X;X;X;X;X;X	XXXXXXXXXXXXXPPPPPPPPPPPPPPPPPP	5.93e-10	125.54	85.157	_RQS(ph)QDASNNPSALTTTSSSSSTK_	RQS(0.841)QDAS(0.147)NNPS(0.012)ALTTTSSSSSTK
gi|472580760	RHTO_05935	269	cyclin c		S	GGGPATRTRRQSQDASNNPSALTTTSSSSST	X;X;X;X;X;X;X;X;X;X;X;X;X;X;X;X;X;X;X;X;X;X;X;X;X;X;X;X;X;X;X	XXXXXXXXXXXXXXXXXXXXXXXXXXXXXXX	9.28e-06	95.206	95.206	_RQS(ph)QDASNNPSALTTTSSSSSTK_	RQS(0.493)QDAS(0.493)NNPS(0.014)ALTTTSSSSSTK
gi|472580761	RHTO_05936	456	conserved hypothetical protein	1	S	EHVAANARRKRRRLDSVGHASTVAGDDGMSD	X;X;X;X;X;X;X;X;X;X;X;X;X;X;X;Phospho (STY);X;X;X;X;X;X;X;X;X;X;X;X;Oxidation (M);X;X	XXXXXXXXXXXXPPPPPPPPPPPPPPPPPPP	0.00150831	67.396	67.396	_RLDS(ph)VGHASTVAGDDGM(ox)SDVSR_	RLDS(0.867)VGHAS(0.13)T(0.002)VAGDDGMSDVSR
gi|472580775	RHTO_05800	270	geranylgeranyl transferase type-1 subunit beta	2	S	LIDRQIRPPPPEPSDSSDEDEEQERRGPVRD	X;X;X;X;X;X;X;X;X;X;X;X;X;X;X;Phospho (STY);Phospho (STY);X;X;X;X;X;X;X;X;X;X;X;X;X;X	XXXXPPPPPPPPPPPPPPPPPPPPPXXXXXX	1.3e-12	142.3	142.3	_QIRPPPPEPSDS(ph)S(ph)DEDEEQER_	QIRPPPPEPS(0.102)DS(0.954)S(0.945)DEDEEQER
gi|472580775	RHTO_05800	271	geranylgeranyl transferase type-1 subunit beta	2	S	IDRQIRPPPPEPSDSSDEDEEQERRGPVRDP	X;X;X;X;X;X;X;X;X;X;X;X;X;X;Phospho (STY);Phospho (STY);X;X;X;X;X;X;X;X;X;X;X;X;X;X;X	XXXPPPPPPPPPPPPPPPPPPPPPXXXXXXX	1.3e-12	142.3	142.3	_QIRPPPPEPSDS(ph)S(ph)DEDEEQER_	QIRPPPPEPS(0.102)DS(0.954)S(0.945)DEDEEQER
gi|472580783	RHTO_05808	91	C6 transcription factor	1	S	RAARTSGVFDGTDDGSPGAEGDGIPARKRSK	X;X;X;X;X;X;X;X;X;X;X;X;X;X;X;Phospho (STY);X;X;X;X;X;X;X;X;X;X;X;X;X;X;X	XXXXPPPPPPPPPPPPPPPPPPPPPPPPXXX	3.02e-115	178.76	178.76	_TSGVFDGTDDGS(ph)PGAEGDGIPAR_	TSGVFDGTDDGS(1)PGAEGDGIPAR
gi|472580784	RHTO_05809	635	Inner centromere protein, ARK-binding domain protein	2	S	RPNSPPPAFSSGRFASPPASPRPASRAAPSG	X;X;X;X;X;X;X;X;X;X;X;X;X;X;X;Phospho (STY);X;X;X;Phospho (STY);X;X;X;X;X;X;X;X;X;X;X	XXXXXXXXXXXXXPPPPPPPPPPPPPXXXXX	0.00258078	97.095	73.983	_FAS(ph)PPAS(ph)PRPASR_	FAS(1)PPAS(0.993)PRPAS(0.007)R
gi|472580784	RHTO_05809	639	Inner centromere protein, ARK-binding domain protein	2	S	PPPAFSSGRFASPPASPRPASRAAPSGLPVA	X;X;X;X;X;X;X;X;X;X;X;Phospho (STY);X;X;X;Phospho (STY);X;X;X;X;X;X;X;X;X;X;X;X;X;X;X	XXXXXXXXXPPPPPPPPPPPPPXXXXXXXXX	0.00258078	97.095	97.095	_FAS(ph)PPAS(ph)PRPASR_	FAS(1)PPAS(1)PRPASR
gi|472580784	RHTO_05809	109	Inner centromere protein, ARK-binding domain protein	1	S	APASPKRSPAIGKENSPAASSGQSSSRRLLS	X;X;X;X;X;X;X;X;X;X;X;X;X;X;X;Phospho (STY);X;X;X;X;X;X;X;X;X;X;X;X;X;X;X	XXXXXXPPPPPPPPPPPPPPPPPPPPPXXXX	0.00292861	79.935	70.699	_RSPAIGKENS(ph)PAASSGQSSSR_	RSPAIGKENS(0.994)PAAS(0.004)S(0.001)GQSSS(0.001)R
gi|472580785	RHTO_05810	195	hypothetical protein	4	S	NQLEQRRPAFTLPHQSPVPSTLSRTAMWAQD	X;X;X;X;X;X;X;X;X;X;X;X;X;X;X;Phospho (STY);X;X;X;Phospho (STY);Phospho (STY);X;Phospho (STY);X;X;X;X;X;X;X;X	XXXXXXPPPPPPPPPPPPPPPPPPXXXXXXX	0.00550048	87.519	87.519	_RPAFTLPHQS(ph)PVPS(ph)T(ph)LS(ph)R_	RPAFT(0.003)LPHQS(0.997)PVPS(1)T(1)LS(1)R
gi|472580785	RHTO_05810	199	hypothetical protein	4	S	QRRPAFTLPHQSPVPSTLSRTAMWAQDQQRR	X;X;X;X;X;X;X;X;X;X;X;Phospho (STY);X;X;X;Phospho (STY);Phospho (STY);X;Phospho (STY);X;X;X;X;X;X;X;X;X;X;X;X	XXPPPPPPPPPPPPPPPPPPXXXXXXXXXXX	0.00550048	87.519	87.519	_RPAFTLPHQS(ph)PVPS(ph)T(ph)LS(ph)R_	RPAFT(0.003)LPHQS(0.997)PVPS(1)T(1)LS(1)R
gi|472580785	RHTO_05810	202	hypothetical protein	4	S	PAFTLPHQSPVPSTLSRTAMWAQDQQRRLAG	X;X;X;X;X;X;X;X;Phospho (STY);X;X;X;Phospho (STY);Phospho (STY);X;Phospho (STY);X;X;X;X;X;X;X;X;X;X;X;X;X;X;X	PPPPPPPPPPPPPPPPPXXXXXXXXXXXXXX	0.00550048	87.519	87.519	_RPAFTLPHQS(ph)PVPS(ph)T(ph)LS(ph)R_	RPAFT(0.003)LPHQS(0.997)PVPS(1)T(1)LS(1)R
gi|472580797	RHTO_05822	298	ubiquitin carboxyl-terminal hydrolase 8	1	S	PPAPRSPRADAMIASSPPQGDFARLAADFER	X;X;X;X;X;X;X;X;X;X;X;Oxidation (M);X;X;X;Phospho (STY);X;X;X;X;X;X;X;X;X;X;X;X;X;X;X	XXXXXXXXPPPPPPPPPPPPPPPPXXXXXXX	0.000387537	110.97	110.97	_ADAM(ox)IASS(ph)PPQGDFAR_	ADAMIAS(0.028)S(0.972)PPQGDFAR
gi|472580797	RHTO_05822	227	ubiquitin carboxyl-terminal hydrolase 8	1	S	APEDRGALSGLSDLPSPTRFMSAFPSVDDLE	X;X;X;X;X;X;X;X;X;X;X;X;X;X;X;Phospho (STY);X;X;X;X;X;X;X;X;X;X;X;X;X;X;X	XXXXXPPPPPPPPPPPPPPXXXXXXXXXXXX	6.6e-25	199.01	199.01	_GALSGLSDLPS(ph)PTR_	GALSGLSDLPS(0.971)PT(0.029)R
gi|472580797	RHTO_05822	138	ubiquitin carboxyl-terminal hydrolase 8		S	RQSSSRTLRQSAVPLSPTSSPRAETGDLVAD	X;X;X;X;X;X;X;X;X;X;X;X;X;X;X;Phospho (STY);X;X;X;X;X;X;X;X;X;X;X;X;X;X;X	XXXXXXXXXPPPPPPPPPPPPPXXXXXXXXX	0.00178092	103.13	103.13	_QSAVPLS(ph)PTSSPR_	QSAVPLS(0.406)PT(0.094)S(0.406)S(0.094)PR
gi|472580797	RHTO_05822	141	ubiquitin carboxyl-terminal hydrolase 8	2	S	SSRTLRQSAVPLSPTSSPRAETGDLVADDAV	X;X;X;X;X;X;X;X;X;X;X;X;X;X;Phospho (STY);Phospho (STY);Phospho (STY);X;X;X;X;X;X;X;X;X;X;X;X;X;X	XXXXXXPPPPPPPPPPPPPPPPPPPPPPPPP	0.00178092	103.13	73.389	_QSAVPLSPTS(ph)S(ph)PRAETGDLVADDAVER_	QSAVPLS(0.381)PT(0.31)S(0.621)S(0.638)PRAET(0.049)GDLVADDAVER
gi|472580797	RHTO_05822	142	ubiquitin carboxyl-terminal hydrolase 8	2	S	SRTLRQSAVPLSPTSSPRAETGDLVADDAVE	X;X;X;X;X;X;X;X;X;X;X;X;X;X;Phospho (STY);Phospho (STY);X;X;X;X;X;X;X;X;X;X;X;X;X;X;X	XXXXXPPPPPPPPPPPPPPPPPPPPPPPPPP	0.00334591	86.8	73.389	_QSAVPLSPTS(ph)S(ph)PRAETGDLVADDAVER_	QSAVPLS(0.381)PT(0.31)S(0.621)S(0.638)PRAET(0.049)GDLVADDAVER
gi|472580801	RHTO_05826	176	nucleoporin Nup40	1	S	GGSLFGGRDVGTPSKSPKFTPYTAPPRATAY	X;X;X;X;X;X;X;X;X;X;X;X;X;X;X;Phospho (STY);X;X;X;X;X;X;X;X;X;X;X;X;X;X;X	XXXXXXXXPPPPPPPPPPXXXXXXXXXXXXX	0.0058055	125.82	109	_DVGTPSKS(ph)PK_	DVGT(0.007)PS(0.151)KS(0.842)PK
gi|472580801	RHTO_05826	150	nucleoporin Nup40	1	S	SGADERMWDSPARRTSVSGSPAARFGGGSLF	X;X;X;X;X;X;X;X;X;X;X;X;X;X;X;Phospho (STY);X;X;X;X;X;X;X;X;X;X;X;X;X;X;X	XXXXXXXXXXXXXPPPPPPPPPPPXXXXXXX	0.000184439	154.1	154.1	_RTS(ph)VSGSPAAR_	RT(0.022)S(0.978)VSGSPAAR
gi|472580802	RHTO_05827	247	RNA-binding protein		S	INDLIQGSLKDVEAPSPSKTRKGKEPAKKSA	X;X;X;X;X;X;X;X;X;X;X;X;X;X;X;Phospho (STY);X;X;X;X;X;X;X;X;X;X;X;X;X;X;X	XXXXXXXXXXPPPPPPPPPPPXXXXXXXXXX	0.00578984	99.941	99.941	_DVEAPS(ph)PSKTR_	DVEAPS(0.451)PS(0.451)KT(0.099)R
gi|472580802	RHTO_05827	249	RNA-binding protein		S	DLIQGSLKDVEAPSPSKTRKGKEPAKKSAKL	X;X;X;X;X;X;X;X;X;X;X;X;X;X;X;X;X;X;X;X;X;X;X;X;X;X;X;X;X;X;X	XXXXXXXXXXXXXXXXXXXXXXXXXXXXXXX	0.00578984	99.941	99.941	_DVEAPS(ph)PSKTR_	DVEAPS(0.451)PS(0.451)KT(0.099)R
gi|472580802	RHTO_05827	213	RNA-binding protein	2	S	RGTKRKAEDEGDEEVSEDEEEDQSEVDEDDN	X;X;X;X;X;X;X;X;X;X;X;X;X;X;X;Phospho (STY);X;X;X;X;X;X;X;Phospho (STY);X;X;X;X;X;X;X	XXXXXPPPPPPPPPPPPPPPPPPPPPPPPPP	9.5e-09	86.191	86.191	_KAEDEGDEEVS(ph)EDEEEDQS(ph)EVDEDDNALDINDLIQGSLK_	KAEDEGDEEVS(1)EDEEEDQS(1)EVDEDDNALDINDLIQGSLK
gi|472580802	RHTO_05827	221	RNA-binding protein	2	S	DEGDEEVSEDEEEDQSEVDEDDNALDINDLI	X;X;X;X;X;X;X;Phospho (STY);X;X;X;X;X;X;X;Phospho (STY);X;X;X;X;X;X;X;X;X;X;X;X;X;X;X	PPPPPPPPPPPPPPPPPPPPPPPPPPPPPPP	9.5e-09	86.191	86.191	_KAEDEGDEEVS(ph)EDEEEDQS(ph)EVDEDDNALDINDLIQGSLK_	KAEDEGDEEVS(1)EDEEEDQS(1)EVDEDDNALDINDLIQGSLK
gi|472580810	RHTO_05835	356	LisH dimerisation motif containing protein	1	S	VRMVQQGRPQPERQLSGQLYQQQQQQQFQQQ	X;X;X;X;X;X;X;X;X;X;X;X;X;X;X;Phospho (STY);X;X;X;X;X;X;X;X;X;X;X;X;X;X;X	XXXXXXXXXXXXXPPPPPPPPPPPPPPPPPP	3.71e-43	186.75	186.75	_QLS(ph)GQLYQQQQQQQFQQQQR_	QLS(1)GQLYQQQQQQQFQQQQR
gi|472580815	RHTO_05840	320	hypothetical protein	1	S	ATPASSSLLRFSRPPSPEPVVQSAEPVTTKP	X;X;X;X;X;X;X;X;X;X;X;X;X;X;X;Phospho (STY);X;X;X;X;X;X;X;X;X;X;X;X;X;X;X	XXXXXXXXXXPPPPPPPPPPPPPPPPPPPPP	0.00905235	72.421	72.421	_FSRPPS(ph)PEPVVQSAEPVTTKPEK_	FS(0.461)RPPS(0.539)PEPVVQSAEPVTTKPEK
gi|472580823	RHTO_05848	216	oestrogen-responsive protein Fam102A/B, N-terminal family protein	1	S	MRRRGAGDLSSMPHTSPPSGSSSRNVSGPTA	X;X;X;X;X;X;X;X;X;X;X;Oxidation (M);X;X;X;Phospho (STY);X;X;X;X;X;X;X;X;X;X;X;X;X;X;X	XXXXPPPPPPPPPPPPPPPPPPPPXXXXXXX	0.00248175	75.358	72.433	_GAGDLSSM(ox)PHTS(ph)PPSGSSSR_	GAGDLS(0.001)S(0.003)MPHT(0.397)S(0.581)PPS(0.005)GS(0.005)S(0.005)S(0.005)R
gi|472580830	RHTO_05855	573	Set3 histone deacetylase complex component Snt1p	2	S	SVSRTRDAAPVAFAHSPPPEPAHSASPKMQL	X;X;X;X;X;X;X;X;X;X;X;X;X;X;X;Phospho (STY);X;X;X;X;X;X;X;Phospho (STY);X;Phospho (STY);X;X;X;X;X	XXXXXXPPPPPPPPPPPPPPPPPPPPPPXXX	0.00106213	76.378	76.378	_DAAPVAFAHS(ph)PPPEPAHS(ph)ASPK_	DAAPVAFAHS(1)PPPEPAHS(0.5)AS(0.5)PK
gi|472580830	RHTO_05855	581	Set3 histone deacetylase complex component Snt1p	2	S	APVAFAHSPPPEPAHSASPKMQLEKEEGEVS	X;X;X;X;X;X;X;Phospho (STY);X;X;X;X;X;X;X;Phospho (STY);X;X;X;X;X;X;X;X;X;X;X;X;X;X;X	PPPPPPPPPPPPPPPPPPPPXXXXXXXXXXX	0.00106213	76.378	56.424	_DAAPVAFAHS(ph)PPPEPAHS(ph)ASPK_	DAAPVAFAHS(0.996)PPPEPAHS(0.502)AS(0.502)PK
gi|472580830	RHTO_05855	583	Set3 histone deacetylase complex component Snt1p	2	S	VAFAHSPPPEPAHSASPKMQLEKEEGEVSPV	X;X;X;X;X;Phospho (STY);X;X;X;X;X;X;X;X;X;Phospho (STY);X;X;X;X;X;X;X;X;X;X;X;X;X;X;X	PPPPPPPPPPPPPPPPPPXXXXXXXXXXXXX	0.00106213	76.378	74.819	_DAAPVAFAHS(ph)PPPEPAHSAS(ph)PK_	DAAPVAFAHS(1)PPPEPAHS(0.429)AS(0.571)PK
gi|472580830	RHTO_05855	441	Set3 histone deacetylase complex component Snt1p	1	S	ERTTTPPLPPRSVPPSKPGSDVEEGELPDED	X;X;X;X;X;X;X;X;X;X;X;X;X;X;X;Phospho (STY);X;X;X;X;X;X;X;X;X;X;X;X;X;X;X	XXXXXXXXXXXPPPPPPPPPPPPPPPPPPPP	2.14e-12	91.113	66.294	_SVPPS(ph)KPGSDVEEGELPDEDGELEELEGEVQEPR_	S(0.057)VPPS(0.865)KPGS(0.079)DVEEGELPDEDGELEELEGEVQEPR
gi|472580830	RHTO_05855	445	Set3 histone deacetylase complex component Snt1p	1	S	TPPLPPRSVPPSKPGSDVEEGELPDEDGELE	X;X;X;X;X;X;X;X;X;X;X;X;X;X;X;Phospho (STY);X;X;X;X;X;X;X;X;X;X;X;X;X;X;X	XXXXXXXPPPPPPPPPPPPPPPPPPPPPPPP	1.91e-25	124.82	124.82	_SVPPSKPGS(ph)DVEEGELPDEDGELEELEGEVQEPR_	S(0.024)VPPS(0.139)KPGS(0.836)DVEEGELPDEDGELEELEGEVQEPR
gi|472580833	RHTO_05858	418	cell division control protein Cdc2	1	S	APARAGRGSAGSLQASPIGRSVPRGEGLMAS	X;X;X;X;X;X;X;X;X;X;X;X;X;X;X;Phospho (STY);X;X;X;X;X;X;X;X;X;X;X;X;X;X;X	XXXXXXXPPPPPPPPPPPPPXXXXXXXXXXX	1.45e-09	170.5	170.5	_GSAGSLQAS(ph)PIGR_	GSAGSLQAS(1)PIGR
gi|472580856	RHTO_05726	758	Ser/Thr protein phosphatase family protein	1	S	AATPTSGGGGGGEGGSA______________	X;X;X;X;X;X;X;X;X;X;X;X;X;X;X;Phospho (STY);X;X;X;X;X;X;X;X;X;X;X;X;X;X;X	PPPPPPPPPPPPPPPPPXXXXXXXXXXXXXX	0.00414428	83.758	83.758	_SPAPAATPTSGGGGGGEGGS(ph)A_	SPAPAATPTSGGGGGGEGGS(1)A
gi|472580872	RHTO_05742	1722	Prefoldin domain protein	1;2	S	EDEYGVTDLDRAGPLSPSREQPGLGSALSPR	X;X;X;X;X;X;X;X;X;X;X;X;X;X;X;Phospho (STY);X;X;X;X;X;X;X;X;X;Phospho (STY);X;X;Phospho (STY);X;X	XXXXXXXXXXXPPPPPPPPPPPPPPPPPPPP	0.00498562	83.869	83.064	_AGPLS(ph)PSREQPGLGSALSPR_	AGPLS(0.988)PS(0.012)REQPGLGSALSPR
gi|472580872	RHTO_05742	1724	Prefoldin domain protein	2	S	EYGVTDLDRAGPLSPSREQPGLGSALSPRAD	X;X;X;X;X;X;X;X;X;X;X;X;X;X;X;Phospho (STY);X;X;X;X;X;X;X;X;X;X;Phospho (STY);X;X;X;X	XXXXXXXXXPPPPPPPPPPPPPPPPPPPPXX	0.00517722	85.362	85.362	_AGPLSPS(ph)REQPGLGSALS(ph)PR_	AGPLS(0.169)PS(0.831)REQPGLGS(0.042)ALS(0.958)PR
gi|472580872	RHTO_05742	1732	Prefoldin domain protein	2	S	RAGPLSPSREQPGLGSALSPRADKGNRTRRV	X;X;X;X;X;Phospho (STY);X;X;X;X;X;X;X;X;X;Phospho (STY);X;X;X;X;X;X;X;X;X;X;X;X;X;X;X	XPPPPPPPPPPPPPPPPPPPPXXXXXXXXXX	0.0059208	82.007	82.007	_AGPLS(ph)PSREQPGLGS(ph)ALSPR_	AGPLS(0.905)PS(0.095)REQPGLGS(0.877)ALS(0.123)PR
gi|472580872	RHTO_05742	1735	Prefoldin domain protein	1;2	S	PLSPSREQPGLGSALSPRADKGNRTRRVPLS	X;X;Phospho (STY);X;Phospho (STY);X;X;X;X;X;X;X;X;X;X;Phospho (STY);X;X;X;X;X;X;X;X;X;X;X;X;X;X;X	PPPPPPPPPPPPPPPPPPXXXXXXXXXXXXX	0.00517722	100.4	85.362	_AGPLSPS(ph)REQPGLGSALS(ph)PR_	AGPLS(0.169)PS(0.831)REQPGLGS(0.042)ALS(0.958)PR
gi|472580872	RHTO_05742	1442	Prefoldin domain protein	1;2	S	EIARARGASTNSVRSSVDESALADELERKVD	X;X;X;X;X;X;X;X;X;X;X;X;X;X;Phospho (STY);Phospho (STY);X;X;X;X;X;X;X;X;X;X;X;X;X;X;X	XXXXXXPPPPPPPPPPPPPPPPPPPPPPXXX	0.00237551	111.77	111.77	_SS(ph)VDESALADELER_	S(0.061)S(0.939)VDESALADELER
gi|472580872	RHTO_05742	118	Prefoldin domain protein	1	S	AAFRRPEGSIAARLASPPPTSIRSAATSPPA	X;X;X;X;X;X;X;X;X;X;X;X;X;X;X;Phospho (STY);X;X;X;X;X;X;X;X;X;X;X;X;X;X;X	XXXXXXXXXXXXXPPPPPPPPPPXXXXXXXX	0.00896581	83.137	83.137	_LAS(ph)PPPTSIR_	LAS(1)PPPTSIR
gi|472580872	RHTO_05742	1598	Prefoldin domain protein	1	S	LEIDTLKRRSLPSLGSPPRASHAPGPPRTPS	X;X;X;X;X;X;X;X;X;X;X;X;X;X;X;Phospho (STY);X;X;X;X;X;X;X;X;X;X;X;X;X;X;X	XXXXXXXXXPPPPPPPPPPXXXXXXXXXXXX	3.41e-05	160.18	160.18	_SLPSLGS(ph)PPR_	SLPSLGS(1)PPR
gi|472580879	RHTO_05749	567	glycosyltransferase family 8 protein	1	S	AASSLSITRNTDRRDSGPGPGAAGAVASGAT	X;X;Phospho (STY);Phospho (STY);X;X;X;X;X;X;X;X;X;X;X;Phospho (STY);X;X;X;X;X;X;X;X;X;X;X;X;X;X;X	XXXXXXXXXPPPPPPPPPPPPPPPPPPPPPP	8.63e-10	109.85	109.85	_RDS(ph)GPGPGAAGAVASGATAATAAATR_	RDS(1)GPGPGAAGAVASGATAATAAATR
gi|472580879	RHTO_05749	549	glycosyltransferase family 8 protein	2	S	GGSSTAVGGANNRRRSGSAASSLSITRNTDR	X;X;X;X;X;X;X;X;X;X;X;X;X;X;X;Phospho (STY);X;X;X;X;Phospho (STY);X;X;X;X;X;X;X;X;X;X	XXXXXXXXXXXXXXPPPPPPPPPPPPPXXXX	0.0114222	66.893	66.893	_RS(ph)GSAAS(ph)SLSITR_	RS(0.703)GS(0.315)AAS(0.839)S(0.134)LS(0.009)ITR
gi|472580879	RHTO_05749	551	glycosyltransferase family 8 protein	1	S	SSTAVGGANNRRRSGSAASSLSITRNTDRRD	X;X;X;X;X;X;X;X;X;X;X;X;X;X;X;Phospho (STY);X;X;X;X;X;X;X;X;X;X;X;X;X;X;X	XXXXXXXXXXXXXPPPPPPPPPPPPXXXXXX	0.000182507	119.56	118.19	_SGS(ph)AASSLSITR_	SGS(1)AASSLSITR
gi|472580879	RHTO_05749	554	glycosyltransferase family 8 protein	2	S	AVGGANNRRRSGSAASSLSITRNTDRRDSGP	X;X;X;X;X;X;X;X;X;X;Phospho (STY);X;X;X;X;Phospho (STY);X;X;X;X;X;X;X;X;X;X;X;X;Phospho (STY);X;X	XXXXXXXXXPPPPPPPPPPPPPXXXXXXXXX	0.0114222	66.893	66.893	_RS(ph)GSAAS(ph)SLSITR_	RS(0.703)GS(0.315)AAS(0.839)S(0.134)LS(0.009)ITR
gi|472580879	RHTO_05749	555	glycosyltransferase family 8 protein	1	S	VGGANNRRRSGSAASSLSITRNTDRRDSGPG	X;X;X;X;X;X;X;X;X;X;X;X;X;X;X;Phospho (STY);X;X;X;X;X;X;X;X;X;X;X;Phospho (STY);X;X;X	XXXXXXXXXPPPPPPPPPPPPXXXXXXXXXX	0.0123721	100.41	100.41	_SGSAASS(ph)LSITR_	SGSAASS(0.77)LS(0.103)IT(0.127)R
gi|472580882	RHTO_05752	340	C6 transcription factor	1	S	SGKGKELERGRPGAPSPLSQTEAGWDRWVPV	X;X;X;X;X;X;X;X;X;X;X;X;X;X;X;Phospho (STY);X;X;X;X;X;X;X;X;X;X;X;X;X;X;X	XXXXXXXXXPPPPPPPPPPPPPPPPPPXXXX	0.0036028	91.657	91.657	_GRPGAPS(ph)PLSQTEAGWDR_	GRPGAPS(1)PLSQTEAGWDR
gi|472580882	RHTO_05752	92	C6 transcription factor		S	YTTVVPTRPKARKAGSSPDESTSSTPGAPPA	X;X;X;X;X;X;X;X;X;X;X;X;X;X;X;Phospho (STY);X;X;X;X;X;X;X;X;X;X;X;X;X;X;X	XXXXXXXXXXXXPPPPPPPPPPPPPPPPPPP	0.00111374	78.501	58.246	_KAGS(ph)SPDESTSSTPGAPPAR_	KAGS(0.495)S(0.495)PDES(0.004)T(0.004)S(0.001)STPGAPPAR
gi|472580882	RHTO_05752	93	C6 transcription factor		S	TTVVPTRPKARKAGSSPDESTSSTPGAPPAR	X;X;X;X;X;X;X;X;X;X;X;X;X;X;X;X;X;X;X;X;X;X;X;X;X;X;X;X;X;X;X	XXXXXXXXXXXXXXXXXXXXXXXXXXXXXXX	0.00111374	78.501	58.246	_KAGS(ph)SPDESTSSTPGAPPAR_	KAGS(0.495)S(0.495)PDES(0.004)T(0.004)S(0.001)STPGAPPAR
gi|472580882	RHTO_05752	99	C6 transcription factor		S	RPKARKAGSSPDESTSSTPGAPPARAVAHPY	X;X;X;X;X;X;X;X;X;X;X;X;X;X;X;Phospho (STY);X;X;X;X;X;X;X;X;X;X;X;X;X;X;X	XXXXXPPPPPPPPPPPPPPPPPPPPXXXXXX	0.00223349	72.184	72.184	_KAGSSPDESTS(ph)STPGAPPAR_	KAGS(0.019)S(0.019)PDES(0.206)T(0.206)S(0.275)S(0.275)T(0.001)PGAPPAR
gi|472580882	RHTO_05752	100	C6 transcription factor		S	PKARKAGSSPDESTSSTPGAPPARAVAHPYA	X;X;X;X;X;X;X;X;X;X;X;X;X;X;X;X;X;X;X;X;X;X;X;X;X;X;X;X;X;X;X	XXXXXXXXXXXXXXXXXXXXXXXXXXXXXXX	0.00223349	72.184	72.184	_KAGSSPDESTS(ph)STPGAPPAR_	KAGS(0.019)S(0.019)PDES(0.206)T(0.206)S(0.275)S(0.275)T(0.001)PGAPPAR
gi|472580885	RHTO_05755	205	conserved hypothetical protein	1	S	IRQSGLWDGASMGRASYSQDELAAPGYPLGH	X;X;X;X;X;X;X;X;X;X;X;X;X;X;X;Phospho (STY);X;X;X;X;X;X;X;X;X;X;X;X;X;X;X	XXXXXXXXXXXXXXPPPPPPPPPPPPPPPPP	0.00339648	77.221	77.221	_AS(ph)YSQDELAAPGYPLGHGR_	AS(0.743)Y(0.117)S(0.14)QDELAAPGYPLGHGR
gi|472580888	RHTO_05758	580	GATA transcription factor	1	S	GSPANGLTQAGQKERSSLPNSASNSDTETVK	X;X;X;X;X;X;X;X;X;X;X;X;X;X;X;Phospho (STY);X;X;X;X;X;X;X;X;X;X;X;X;X;X;X	XXXXXXXXXXXXXPPPPPPPPPPPPPPPPPP	0.00134455	110.56	110.56	_ERS(ph)SLPNSASNSDTETVK_	ERS(0.5)S(0.5)LPNSASNSDTETVK
gi|472580888	RHTO_05758	581	GATA transcription factor	1	S	SPANGLTQAGQKERSSLPNSASNSDTETVKA	X;X;X;X;X;X;X;X;X;X;X;X;X;X;X;X;X;X;X;X;X;X;X;X;X;X;X;X;X;X;X	XXXXXXXXXXXXXXXXXXXXXXXXXXXXXXX	0.00134455	110.56	110.56	_ERS(ph)SLPNSASNSDTETVK_	ERS(0.5)S(0.5)LPNSASNSDTETVK
gi|472580888	RHTO_05758	470	GATA transcription factor	1	S	AANALAHAQSNSRSRSPATGSAAPSVADATS	X;X;X;X;X;X;X;X;X;X;X;X;X;X;X;Phospho (STY);X;X;X;X;X;X;X;X;X;X;X;X;X;X;X	XXXXXXXXXXXXXPPPPPPPPPPPPPPPPPP	0.00132672	107.56	90.084	_SRS(ph)PATGSAAPSVADATSR_	S(0.015)RS(0.983)PAT(0.002)GSAAPSVADATSR
gi|472580889	RHTO_05759	84	conserved hypothetical protein	1;2	S	SPKTPSPSRAAPFPLSPISPRSVPHSQLHPP	X;X;X;X;X;X;X;X;X;X;X;X;X;X;X;Phospho (STY);X;X;Phospho (STY);X;X;X;X;X;X;X;X;X;X;X;X	XXXXXXXXXPPPPPPPPPPPPXXXXXXXXXX	0.000453734	113.72	73.498	_AAPFPLS(ph)PIS(ph)PR_	AAPFPLS(1)PIS(1)PR
gi|472580889	RHTO_05759	87	conserved hypothetical protein	1;2	S	TPSPSRAAPFPLSPISPRSVPHSQLHPPPTP	X;X;X;X;X;X;X;X;X;X;X;X;Phospho (STY);X;X;Phospho (STY);X;X;X;X;X;X;X;X;X;X;X;X;X;X;X	XXXXXXPPPPPPPPPPPPXXXXXXXXXXXXX	1.65e-05	123.29	73.498	_AAPFPLS(ph)PIS(ph)PR_	AAPFPLS(1)PIS(1)PR
gi|472580896	RHTO_05766	391	FY-rich domain containing protein	1	S	GLQGSTIAANVERALSGETLEVVSDGPRGGK	X;X;X;X;X;X;X;X;X;X;X;X;X;X;X;Phospho (STY);X;X;X;X;X;X;X;X;X;X;X;X;X;X;X	XXXXXXXXXXXXXPPPPPPPPPPPPPPPXXX	1.14e-15	171.98	171.98	_ALS(ph)GETLEVVSDGPR_	ALS(1)GETLEVVSDGPR
gi|472580896	RHTO_05766	399	FY-rich domain containing protein	1	S	ANVERALSGETLEVVSDGPRGGKRRRDDSQG	X;X;X;X;X;X;X;X;X;X;X;X;X;X;X;Phospho (STY);X;X;X;X;X;X;X;X;X;X;X;X;X;X;X	XXXXXPPPPPPPPPPPPPPPXXXXXXXXXXX	1.15e-06	138.42	138.42	_ALSGETLEVVS(ph)DGPR_	ALSGETLEVVS(1)DGPR
gi|472580899	RHTO_05769	407	phospholipase D	1	S	GSTKLLGGGKLKRARSAGEAEGPSSGVQTPS	X;X;X;X;X;X;X;X;X;X;X;X;X;X;X;Phospho (STY);X;X;X;X;X;X;X;X;X;X;X;X;X;X;X	XXXXXXXXXXXXXPPPPPPPPPPPPPPPPPP	9.6e-18	135.91	135.91	_ARS(ph)AGEAEGPSSGVQTPSGEAGGHSR_	ARS(1)AGEAEGPSSGVQTPSGEAGGHSR
gi|472580899	RHTO_05769	831	phospholipase D	2	S	YRKGLNFLHANGTNDSLDDVDPELREGNVDL	X;X;X;X;X;X;X;X;X;X;X;X;Phospho (STY);X;X;Phospho (STY);X;X;X;X;X;X;X;X;X;X;X;X;X;X;X	XXPPPPPPPPPPPPPPPPPPPPPPPXXXXXX	3.72e-15	141.21	93.949	_KGLNFLHANGT(ph)NDS(ph)LDDVDPELR_	KGLNFLHANGT(1)NDS(1)LDDVDPELR
gi|472580900	RHTO_05770	401	Usp (universal stress protein) family protein	1	S	RRPLRVSRTVHRKISSLDRTARVALADAAIE	X;X;X;X;X;X;X;X;X;X;X;X;X;X;X;Phospho (STY);X;X;X;X;X;X;X;X;X;X;X;X;X;X;X	XXXXXXXXXXXXPPPPPPPXXXXXXXXXXXX	0.00452458	117.52	99.568	_KISS(ph)LDR_	KIS(0.038)S(0.962)LDR
gi|472580906	RHTO_05776	74	tRNA specific adenosine deaminase		S	LHAEFDALRHLLPDRSHAQTPGLTRPYTPQA	X;X;X;X;X;X;X;X;X;X;X;X;X;X;X;Phospho (STY);X;X;X;X;X;X;X;X;X;X;X;Phospho (STY);X;X;X	XXXXXXXXXXXXXXXPPPPPPPPPPPPPPPP	1.12e-05	82.635	82.635	_S(ph)HAQTPGLTRPYT(ph)PQAEDVIAAAAEK_	S(0.311)HAQT(0.311)PGLT(0.311)RPY(0.48)T(0.588)PQAEDVIAAAAEK
gi|472580906	RHTO_05776	217	tRNA specific adenosine deaminase	2	S	KKSNRVLKTEIPGVVSTPSSPASSLSRTSTP	X;X;X;X;X;X;X;X;X;X;X;X;X;X;X;Phospho (STY);X;X;Phospho (STY);Phospho (STY);X;X;X;X;X;X;X;X;X;X;X	XXXXXPPPPPPPPPPPPPPPPPPPPPPXXXX	8.43e-14	144.18	90.712	_VLKTEIPGVVS(ph)TPS(ph)SPASSLSR_	VLKTEIPGVVS(0.917)T(0.083)PS(0.38)S(0.315)PAS(0.127)S(0.152)LS(0.026)R
gi|472580906	RHTO_05776	220	tRNA specific adenosine deaminase	2	S	NRVLKTEIPGVVSTPSSPASSLSRTSTPALY	X;X;X;X;X;X;X;X;X;X;X;X;Phospho (STY);Phospho (STY);X;Phospho (STY);X;X;X;X;X;X;X;X;X;X;X;X;X;X;X	XXPPPPPPPPPPPPPPPPPPPPPPXXXXXXX	1.59e-08	144.18	112.13	_TEIPGVVST(ph)PS(ph)SPASSLSR_	TEIPGVVS(0.389)T(0.452)PS(0.615)S(0.499)PAS(0.037)S(0.007)LS(0.001)R
gi|472580906	RHTO_05776	221	tRNA specific adenosine deaminase	2	S	RVLKTEIPGVVSTPSSPASSLSRTSTPALYP	X;X;X;X;X;X;X;X;X;X;X;Phospho (STY);X;X;X;Phospho (STY);X;X;X;X;X;X;X;X;X;X;X;X;X;X;X	XPPPPPPPPPPPPPPPPPPPPPPXXXXXXXX	8.43e-14	132.53	132.53	_VLKTEIPGVVS(ph)TPSS(ph)PASSLSR_	VLKTEIPGVVS(0.73)T(0.269)PS(0.098)S(0.9)PAS(0.002)S(0.001)LSR
gi|472580908	RHTO_05778	210	DNA repair protein rad16	2	S	ARSVSRSLKGKGRARSPSFEVVIEERKPTRK	X;X;X;X;X;X;X;X;X;X;X;X;X;X;X;Phospho (STY);X;Phospho (STY);X;X;X;X;X;X;X;X;X;X;X;X;X	XXXXXXXXXXXXXPPPPPPPPPPPPPXXXXX	0.0071594	99.451	89.049	_ARS(ph)PS(ph)FEVVIEER_	ARS(1)PS(1)FEVVIEER
gi|472580908	RHTO_05778	212	DNA repair protein rad16	2	S	SVSRSLKGKGRARSPSFEVVIEERKPTRKER	X;X;X;X;X;X;X;X;X;X;X;X;X;Phospho (STY);X;Phospho (STY);X;X;X;X;X;X;X;X;X;X;X;X;X;X;X	XXXXXXXXXXXPPPPPPPPPPPPPXXXXXXX	0.0071594	99.451	89.049	_ARS(ph)PS(ph)FEVVIEER_	ARS(1)PS(1)FEVVIEER
gi|472580908	RHTO_05778	97	DNA repair protein rad16	2	S	AASKKLVLPTFQLTDSEEEEVKLSKRAAKGK	X;X;X;X;X;X;X;X;X;X;X;X;X;Phospho (STY);X;Phospho (STY);X;X;X;X;X;X;X;X;X;X;X;X;X;X;X	XXXXPPPPPPPPPPPPPPPPPPXXXXXXXXX	6.65e-09	124.25	124.25	_KLVLPTFQLT(ph)DS(ph)EEEEVK_	KLVLPTFQLT(1)DS(1)EEEEVK
gi|472580908	RHTO_05778	19	DNA repair protein rad16	3	S	PRRSSTHSSAVTIISSDSETEGAATGARGSG	X;X;X;X;X;X;X;X;X;X;X;X;X;X;Phospho (STY);Phospho (STY);X;Phospho (STY);X;Phospho (STY);X;X;X;X;X;X;X;X;X;X;X	XXPPPPPPPPPPPPPPPPPPPPPPPPPPXXX	0.0112888	62.193	55.117	_RSSTHSSAVTIISS(ph)DS(ph)ET(ph)EGAATGAR_	RS(0.002)S(0.001)T(0.001)HS(0.001)S(0.001)AVT(0.01)IIS(0.406)S(0.854)DS(0.866)ET(0.826)EGAAT(0.033)GAR
gi|472580908	RHTO_05778	21	DNA repair protein rad16	3	S	RSSTHSSAVTIISSDSETEGAATGARGSGTG	X;X;X;X;X;X;X;X;X;X;X;X;Phospho (STY);Phospho (STY);X;Phospho (STY);X;Phospho (STY);X;X;X;X;X;X;X;X;X;X;X;X;X	PPPPPPPPPPPPPPPPPPPPPPPPPPXXXXX	0.0112888	62.193	55.117	_RSSTHSSAVTIISS(ph)DS(ph)ET(ph)EGAATGAR_	RS(0.002)S(0.001)T(0.001)HS(0.001)S(0.001)AVT(0.01)IIS(0.406)S(0.854)DS(0.866)ET(0.826)EGAAT(0.033)GAR
gi|472580912	RHTO_05782	1211	osomolarity two-component system, response regulator SSK1	1	S	PASNATSPRALGGSQSPLYSVSRRGSGSGAV	X;X;X;X;X;X;X;X;X;X;X;X;X;X;X;Phospho (STY);X;X;X;X;X;X;X;X;X;X;X;X;X;X;X	XXXXXXXXXPPPPPPPPPPPPPPXXXXXXXX	2.07e-08	162.26	162.26	_ALGGSQS(ph)PLYSVSR_	ALGGSQS(1)PLYSVSR
gi|472580912	RHTO_05782	1217	osomolarity two-component system, response regulator SSK1	1	S	SPRALGGSQSPLYSVSRRGSGSGAVSPIVSP	X;X;X;X;X;X;X;X;X;X;X;X;X;X;X;Phospho (STY);X;X;X;X;X;X;X;X;X;X;X;X;X;X;X	XXXPPPPPPPPPPPPPPXXXXXXXXXXXXXX	0.00251165	136.39	136.39	_ALGGSQSPLYSVS(ph)R_	ALGGSQSPLYS(0.027)VS(0.972)R
gi|472580912	RHTO_05782	1262	osomolarity two-component system, response regulator SSK1	1	S	AARAFAAARARPATPSSPAGPAKARTRSSTM	X;X;X;X;X;X;X;X;X;X;X;X;X;X;X;Phospho (STY);X;X;X;X;X;X;X;X;X;X;X;X;X;X;X	XXXXXXXXXPPPPPPPPPPPPPPXXXXXXXX	0.0114228	71.806	71.806	_ARPATPS(ph)SPAGPAK_	ARPAT(0.313)PS(0.685)S(0.002)PAGPAK
gi|472580912	RHTO_05782	1484	osomolarity two-component system, response regulator SSK1	1	S	SVSSSALSGTPARPRSPARMKAPPGFSAAEL	X;X;X;X;X;X;X;X;X;X;X;X;X;X;X;Phospho (STY);X;X;X;X;X;X;X;X;X;X;X;X;X;X;X	PPPPPPPPPPPPPPPPPPPXXXXXXXXXXXX	0.000372677	74.444	67.227	_KSETPDSSVSSSALSGTPARPRS(ph)PAR_	KSETPDSSVSSSALS(0.006)GT(0.123)PARPRS(0.871)PAR
gi|472580912	RHTO_05782	937	osomolarity two-component system, response regulator SSK1	1	S	TSPTSPGIQYWTPRLSPSLASKEQQEFDFSV	X;X;X;X;X;X;X;X;X;X;X;X;X;X;X;Phospho (STY);X;X;X;X;X;X;X;X;X;X;X;X;X;X;X	XXXXXXXXXXXXXXPPPPPPPPXXXXXXXXX	0.00282324	136.75	136.75	_LS(ph)PSLASK_	LS(1)PSLASK
gi|472580912	RHTO_05782	667	osomolarity two-component system, response regulator SSK1	1	S	WALEALLPAARPKTQSIAEDPSTILGRRRAS	X;X;X;X;X;X;X;X;X;X;X;X;X;X;X;Phospho (STY);X;X;X;X;X;X;X;X;X;X;X;X;X;X;X	XXXXXXXXXXXXXPPPPPPPPPPPPPPXXXX	3.52e-06	140.28	129.88	_TQS(ph)IAEDPSTILGR_	TQS(1)IAEDPSTILGR
gi|472580920	RHTO_05790	756	hypothetical protein	2	S	EDDASCLPLDAARSASPSAIAPLPSSPHAAR	X;X;X;X;X;X;X;X;X;X;X;X;X;X;X;Phospho (STY);X;X;X;X;X;X;X;X;Phospho (STY);X;X;X;X;X;X	XXXXXXXXXXXXXPPPPPPPPPPPPPPPPPP	0.00232027	105.14	105.14	_SAS(ph)PSAIAPLPS(ph)SPHAAR_	S(0.112)AS(0.868)PS(0.02)AIAPLPS(0.5)S(0.5)PHAAR
gi|472580920	RHTO_05790	765	hypothetical protein	2	S	DAARSASPSAIAPLPSSPHAARQGTASPLGT	X;X;X;X;X;X;Phospho (STY);X;X;X;X;X;X;X;X;Phospho (STY);X;X;X;X;X;X;X;X;X;X;X;X;X;X;X	XXXXPPPPPPPPPPPPPPPPPPXXXXXXXXX	0.00232027	105.14	105.14	_SAS(ph)PSAIAPLPS(ph)SPHAAR_	S(0.112)AS(0.868)PS(0.02)AIAPLPS(0.5)S(0.5)PHAAR
gi|472580920	RHTO_05790	766	hypothetical protein	2	S	AARSASPSAIAPLPSSPHAARQGTASPLGTP	X;X;X;X;X;X;X;X;X;X;X;X;X;X;X;X;X;X;X;X;X;X;X;X;X;X;X;X;X;X;X	XXXXXXXXXXXXXXXXXXXXXXXXXXXXXXX	0.00232027	105.14	105.14	_SAS(ph)PSAIAPLPS(ph)SPHAAR_	S(0.112)AS(0.868)PS(0.02)AIAPLPS(0.5)S(0.5)PHAAR
gi|472580921	RHTO_05791	52	conserved hypothetical protein	1	S	RDTFTLFRSATGRAQSPSPSQTPHSLKHFAT	X;X;X;X;X;X;X;X;X;X;X;X;X;X;X;Phospho (STY);X;X;X;X;X;X;X;X;X;X;X;X;X;X;X	XXXXXXXXXXXXXPPPPPPPPPPPPPPXXXX	3.94e-06	135.81	135.81	_AQS(ph)PSPSQTPHSLK_	AQS(0.998)PS(0.001)PSQTPHSLK
gi|472580921	RHTO_05791	56	conserved hypothetical protein	1	S	TLFRSATGRAQSPSPSQTPHSLKHFATSTVS	X;X;X;X;X;X;X;X;X;X;X;X;X;X;X;Phospho (STY);X;X;X;X;X;X;X;X;X;X;X;X;X;X;X	XXXXXXXXXPPPPPPPPPPPPPPXXXXXXXX	2.65e-06	146.88	146.88	_AQSPSPS(ph)QTPHSLK_	AQS(0.058)PS(0.109)PS(0.833)QTPHSLK
gi|472580921	RHTO_05791	340	conserved hypothetical protein	1	S	SPPPEEDSAALSRTGSNLGTPGAAGLAGTKR	X;X;X;X;X;X;X;X;X;X;X;X;X;X;X;Phospho (STY);X;X;X;X;X;X;X;X;X;X;X;X;X;X;X	XXXXXXXXXXXXXPPPPPPPPPPPPPPPPPP	0.00140881	99.407	74.786	_TGS(ph)NLGTPGAAGLAGTKR_	T(0.11)GS(0.889)NLGT(0.001)PGAAGLAGTKR
gi|472580940	RHTO_05631	760	serine/threonine-protein kinase HSL1,negative regulator of Swe1 kinase		S	RGSSREGGVASPTPGSTTSPSRPANRQTVSY	X;X;X;X;X;X;X;X;X;X;X;X;X;X;X;Phospho (STY);X;X;X;X;X;X;X;X;X;X;X;X;X;X;X	XXXXXPPPPPPPPPPPPPPPPPPPPPXXXXX	0.000488944	101.67	101.67	_EGGVASPTPGS(ph)TTSPSRPANR_	EGGVASPT(0.016)PGS(0.448)T(0.448)T(0.043)S(0.043)PS(0.001)RPANR
gi|472580940	RHTO_05631	763	serine/threonine-protein kinase HSL1,negative regulator of Swe1 kinase	1	S	SREGGVASPTPGSTTSPSRPANRQTVSYASY	X;X;X;X;X;X;X;X;X;X;X;X;X;X;X;Phospho (STY);X;X;X;X;X;X;X;X;X;X;X;X;X;X;X	XXPPPPPPPPPPPPPPPPPPPPPXXXXXXXX	8.88e-08	124.46	124.46	_EGGVASPTPGSTTS(ph)PSRPANR_	EGGVASPTPGS(0.029)T(0.029)T(0.111)S(0.802)PS(0.029)RPANR
gi|472580941	RHTO_05632	670	protein serine/threonine kinase	1	S	LSGANVDGGGRAREGSVPAITPLERTQSPSS	X;X;X;X;X;X;X;X;X;X;X;X;X;X;X;Phospho (STY);X;X;X;X;X;X;X;X;X;X;X;X;X;X;X	XXXXXXXXXXXPPPPPPPPPPPPPPXXXXXX	1.43e-05	148.7	144.18	_EGS(ph)VPAITPLER_	EGS(1)VPAITPLER
gi|472580941	RHTO_05632	728	protein serine/threonine kinase	1	S	IDENPAAEEGREHQLSTGPSRESNLTAVEDS	X;X;X;X;X;X;X;X;X;X;X;X;X;X;X;Phospho (STY);X;X;X;X;X;X;X;X;X;X;X;X;X;X;X	PPPPPPPPPPPPPPPPPPPPPXXXXXXXXXX	0.00536378	98.592	70.094	_IDENPAAEEGREHQLS(ph)TGPSR_	IDENPAAEEGREHQLS(0.846)T(0.151)GPS(0.002)R
gi|472580941	RHTO_05632	744	protein serine/threonine kinase	1	S	TGPSRESNLTAVEDSSAAGHANTLTPSRRPR	X;X;X;X;X;X;X;X;X;X;X;X;X;X;X;Phospho (STY);X;X;X;X;X;X;X;X;X;X;X;X;X;X;X	XXXXXPPPPPPPPPPPPPPPPPPPPPPPXXX	0.00327019	65.118	65.118	_ESNLTAVEDSS(ph)AAGHANTLTPSR_	ES(0.001)NLT(0.011)AVEDS(0.154)S(0.831)AAGHANT(0.002)LTPSR
gi|472580941	RHTO_05632	320	protein serine/threonine kinase	2	S	KHHGGSKFEIGGGSDSHASTPRSGKSSPRGT	X;X;X;X;X;X;X;X;X;X;X;X;X;X;X;Phospho (STY);X;X;Phospho (STY);X;X;X;X;X;X;X;X;X;X;X;X	XXXXXXXPPPPPPPPPPPPPPPXXXXXXXXX	0.000644092	140.35	140.35	_FEIGGGSDS(ph)HAS(ph)TPR_	FEIGGGS(0.362)DS(0.637)HAS(0.813)T(0.187)PR
gi|472580941	RHTO_05632	323	protein serine/threonine kinase	2	S	GGSKFEIGGGSDSHASTPRSGKSSPRGTSQP	X;X;X;X;X;X;X;X;X;X;X;X;Phospho (STY);X;X;Phospho (STY);Phospho (STY);X;X;X;X;X;X;X;X;X;X;X;Phospho (STY);X;X	XXXXPPPPPPPPPPPPPPPXXXXXXXXXXXX	0.000644092	140.35	140.35	_FEIGGGSDS(ph)HAS(ph)TPR_	FEIGGGS(0.362)DS(0.637)HAS(0.813)T(0.187)PR
gi|472580941	RHTO_05632	336	protein serine/threonine kinase	2	S	HASTPRSGKSSPRGTSQPGTPSGARTPVEKD	X;X;Phospho (STY);Phospho (STY);X;X;X;X;X;X;X;X;X;X;X;Phospho (STY);X;X;X;X;X;Phospho (STY);X;X;X;X;X;X;X;X;X	XXXXXXXXXXXXXPPPPPPPPPPPPPPPPPX	0.00918202	98.443	98.443	_GTS(ph)QPGTPS(ph)GARTPVEK_	GT(0.025)S(0.962)QPGT(0.015)PS(0.697)GART(0.302)PVEK
gi|472580941	RHTO_05632	342	protein serine/threonine kinase	1;2	S	SGKSSPRGTSQPGTPSGARTPVEKDYTDTAL	X;X;X;X;X;X;X;X;X;Phospho (STY);X;X;X;Phospho (STY);X;Phospho (STY);X;X;X;X;X;X;X;X;X;X;X;X;X;X;X	XXXXXXXPPPPPPPPPPPPPPPPPXXXXXXX	0.00918202	98.443	80.706	_GTSQPGT(ph)PS(ph)GARTPVEK_	GTS(0.001)QPGT(0.986)PS(0.898)GART(0.115)PVEK
gi|472580941	RHTO_05632	215	protein serine/threonine kinase	1	S	RAMESPQRGTLPRHGSFQESSPRSSFASSSM	X;X;X;X;X;X;X;X;X;X;X;X;X;X;X;Phospho (STY);X;X;X;X;X;X;X;X;X;X;X;X;X;X;X	XXXXXXXXXXXXXPPPPPPPPPPXXXXXXXX	0.000954721	139.86	139.86	_HGS(ph)FQESSPR_	HGS(1)FQESSPR
gi|472580941	RHTO_05632	220	protein serine/threonine kinase	1	S	PQRGTLPRHGSFQESSPRSSFASSSMVNVQG	X;X;X;X;X;X;X;X;X;X;X;X;X;X;X;Phospho (STY);X;X;X;X;X;X;X;X;X;X;X;X;X;X;X	XXXXXXXXPPPPPPPPPPXXXXXXXXXXXXX	3.75e-20	200.93	200.93	_HGSFQESS(ph)PR_	HGSFQES(0.182)S(0.818)PR
gi|472580941	RHTO_05632	792	protein serine/threonine kinase	3	S	DKLAPSSPAGRHRSDSVASNATWTTGAADSI	X;X;X;X;X;Phospho (STY);Phospho (STY);X;X;X;X;X;X;X;X;Phospho (STY);X;X;Phospho (STY);X;X;X;X;X;Phospho (STY);X;X;X;X;X;X	XXXXXXXXXXXPPPPPPPPPPPPPPPPPPPP	0.00817236	76.817	76.817	_HRSDS(ph)VAS(ph)NATWTT(ph)GAADSIFR_	HRS(0.222)DS(0.768)VAS(0.598)NAT(0.285)WT(0.312)T(0.792)GAADS(0.022)IFR
gi|472580941	RHTO_05632	795	protein serine/threonine kinase	3	S	APSSPAGRHRSDSVASNATWTTGAADSIFRL	X;X;Phospho (STY);Phospho (STY);X;X;X;X;X;X;Phospho (STY);X;Phospho (STY);X;X;Phospho (STY);X;X;Phospho (STY);X;X;Phospho (STY);X;X;X;X;X;X;X;X;X	XXXXXXXXPPPPPPPPPPPPPPPPPPPPPPX	0.00817236	85.619	85.619	_HRS(ph)DSVAS(ph)NAT(ph)WTTGAADSIFR_	HRS(0.805)DS(0.199)VAS(0.926)NAT(0.971)WT(0.078)T(0.02)GAADSIFR
gi|472580941	RHTO_05632	782	protein serine/threonine kinase	1	S	PAPSSGLGTSDKLAPSSPAGRHRSDSVASNA	X;X;X;X;X;X;X;X;X;X;X;X;X;X;X;Phospho (STY);X;X;X;X;X;X;X;Phospho (STY);X;Phospho (STY);X;X;Phospho (STY);X;X	PPPPPPPPPPPPPPPPPPPPPXXXXXXXXXX	2.1e-13	126.9	101.29	_TDDPGPPPAPSSGLGTSDKLAPS(ph)SPAGR_	TDDPGPPPAPSSGLGTSDKLAPS(0.5)S(0.5)PAGR
gi|472580941	RHTO_05632	783	protein serine/threonine kinase	1	S	APSSGLGTSDKLAPSSPAGRHRSDSVASNAT	X;X;X;X;X;X;X;X;X;X;X;X;X;X;X;Phospho (STY);X;X;X;X;X;X;Phospho (STY);X;Phospho (STY);X;X;Phospho (STY);X;X;Phospho (STY)	XXXXXXXXXXXPPPPPPPPPXXXXXXXXXXX	2.1e-13	180.19	180.19	_LAPSS(ph)PAGR_	LAPSS(1)PAGR
gi|472580941	RHTO_05632	108	protein serine/threonine kinase	1;2	S	TPSDGSRSQVPSRQASSVGFGFLGAEGRRGG	X;X;X;X;X;X;X;X;X;X;X;X;X;X;X;Phospho (STY);Phospho (STY);X;X;X;X;X;X;X;X;X;X;X;X;X;X	XXXXXXXPPPPPPPPPPPPPPPPPPPPPXXX	0.00234658	111.45	83.229	_SQVPSRQAS(ph)S(ph)VGFGFLGAEGR_	S(0.014)QVPS(0.147)RQAS(0.989)S(0.85)VGFGFLGAEGR
gi|472580941	RHTO_05632	109	protein serine/threonine kinase	1;2	S	PSDGSRSQVPSRQASSVGFGFLGAEGRRGGG	X;X;X;X;X;X;X;X;X;X;X;X;X;X;Phospho (STY);Phospho (STY);X;X;X;X;X;X;X;X;X;X;X;X;X;X;X	XXXXXXPPPPPPPPPPPPPPPPPPPPPXXXX	0.0104932	88.075	83.229	_SQVPSRQAS(ph)S(ph)VGFGFLGAEGR_	S(0.014)QVPS(0.147)RQAS(0.989)S(0.85)VGFGFLGAEGR
gi|472580941	RHTO_05632	169	protein serine/threonine kinase	1	S	FQLSHHIQRVNSHHRSIEEPLPADHEPEHGP	X;X;X;X;X;X;X;X;X;X;X;X;X;X;X;Phospho (STY);X;X;X;X;X;X;X;X;X;X;X;X;X;X;X	XXXXXXXXXXXXXXXPPPPPPPPPPPPPPPP	5.05e-06	114.63	90.978	_S(ph)IEEPLPADHEPEHGPPDYTR_	S(1)IEEPLPADHEPEHGPPDYTR
gi|472580941	RHTO_05632	59	protein serine/threonine kinase		S	SSGGEGDSSAPASSRSSTLASSVSDFDDSAL	X;X;X;X;X;X;X;X;X;X;X;X;X;X;X;Phospho (STY);X;X;X;X;X;X;X;X;X;X;X;X;X;X;X	XXXXXXXXXXXXXXXPPPPPPPPPPPPPPPP	1.5e-09	124.84	124.84	_S(ph)STLASSVSDFDDSALDQGAR_	S(0.333)S(0.333)T(0.333)LAS(0.001)S(0.001)VSDFDDSALDQGAR
gi|472580941	RHTO_05632	60	protein serine/threonine kinase		S	SGGEGDSSAPASSRSSTLASSVSDFDDSALD	X;X;X;X;X;X;X;X;X;X;X;X;X;X;X;X;X;X;X;X;X;X;X;X;X;X;X;X;X;X;X	XXXXXXXXXXXXXXXXXXXXXXXXXXXXXXX	1.5e-09	124.84	124.84	_S(ph)STLASSVSDFDDSALDQGAR_	S(0.333)S(0.333)T(0.333)LAS(0.001)S(0.001)VSDFDDSALDQGAR
gi|472580941	RHTO_05632	67	protein serine/threonine kinase	1	S	SAPASSRSSTLASSVSDFDDSALDQGARLAR	X;X;X;X;X;X;X;X;X;X;X;X;X;X;X;Phospho (STY);X;X;X;X;X;X;X;X;X;X;X;X;X;X;X	XXXXXXXPPPPPPPPPPPPPPPPPPPPPXXX	0.00123518	99.092	99.092	_SSTLASSVS(ph)DFDDSALDQGAR_	S(0.047)S(0.047)T(0.039)LAS(0.032)S(0.032)VS(0.802)DFDDS(0.001)ALDQGAR
gi|472580942	RHTO_05633	232	hypothetical protein	2	S	PLSFRARPPAAEEPASDASDDPLLLRGTAPR	X;X;X;X;X;X;X;X;X;X;X;X;X;X;X;Phospho (STY);X;X;Phospho (STY);X;X;X;X;X;X;X;X;X;X;X;X	XXXXXPPPPPPPPPPPPPPPPPPPPPXXXXX	0.000823565	105.61	105.61	_ARPPAAEEPAS(ph)DAS(ph)DDPLLLR_	ARPPAAEEPAS(1)DAS(1)DDPLLLR
gi|472580942	RHTO_05633	235	hypothetical protein	2	S	FRARPPAAEEPASDASDDPLLLRGTAPRRRD	X;X;X;X;X;X;X;X;X;X;X;X;Phospho (STY);X;X;Phospho (STY);X;X;X;X;X;X;X;X;X;X;X;X;X;X;X	XXPPPPPPPPPPPPPPPPPPPPPXXXXXXXX	0.000823565	105.61	105.61	_ARPPAAEEPAS(ph)DAS(ph)DDPLLLR_	ARPPAAEEPAS(1)DAS(1)DDPLLLR
gi|472580942	RHTO_05633	132	hypothetical protein		S	KGKAKATPAKRQRTGSEEYIPSSTPSTTTST	X;X;X;X;X;X;X;X;X;X;X;X;X;X;X;X;X;X;X;X;X;X;X;X;X;X;X;X;X;X;X	XXXXXXXXXXXXXXXXXXXXXXXXXXXXXXX	0.000418737	83.905	83.905	_QRT(ph)GSEEYIPSSTPSTTTSTSSTR_	QRT(0.459)GS(0.459)EEY(0.082)IPSSTPSTTTSTSSTR
gi|472580942	RHTO_05633	138	hypothetical protein		S	TPAKRQRTGSEEYIPSSTPSTTTSTSSTRSP	X;X;X;X;X;X;X;X;X;X;X;X;X;X;X;Phospho (STY);X;X;X;X;X;X;X;X;X;X;X;X;X;X;X	XXXXXXXPPPPPPPPPPPPPPPPPPPPPPPP	0.00166752	72.399	72.399	_TGSEEYIPS(ph)STPSTTTSTSSTRSPVSLR_	TGSEEYIPS(0.362)S(0.362)T(0.109)PS(0.109)T(0.029)T(0.009)T(0.003)S(0.003)T(0.003)S(0.003)S(0.003)T(0.003)RS(0.003)PVSLR
gi|472580942	RHTO_05633	139	hypothetical protein		S	PAKRQRTGSEEYIPSSTPSTTTSTSSTRSPV	X;X;X;X;X;X;X;X;X;X;X;X;X;X;X;X;X;X;X;X;X;X;X;X;X;X;X;X;X;X;X	XXXXXXXXXXXXXXXXXXXXXXXXXXXXXXX	0.00166752	72.399	72.399	_TGSEEYIPS(ph)STPSTTTSTSSTRSPVSLR_	TGSEEYIPS(0.362)S(0.362)T(0.109)PS(0.109)T(0.029)T(0.009)T(0.003)S(0.003)T(0.003)S(0.003)S(0.003)T(0.003)RS(0.003)PVSLR
gi|472580942	RHTO_05633	214	hypothetical protein		S	RRRSRSAVPSPPSSQSTDPLSFRARPPAAEE	X;X;X;X;X;X;X;X;X;X;X;X;X;X;X;Phospho (STY);X;X;X;X;X;X;X;X;X;X;X;X;X;X;X	XXXXXPPPPPPPPPPPPPPPPPPXXXXXXXX	3.34e-06	120.9	120.9	_SAVPSPPSSQS(ph)TDPLSFR_	SAVPS(0.016)PPS(0.01)S(0.064)QS(0.455)T(0.455)DPLSFR
gi|472580947	RHTO_05638	96	RNA binding protein Nrd1		S	KEGKGKEKAAPAPAGSTTPSGSPPPDDGAGA	X;X;X;X;X;X;X;X;X;X;X;X;X;X;X;Phospho (STY);X;Phospho (STY);X;Phospho (STY);X;X;X;X;X;X;X;X;X;X;X	XXXXXXXXPPPPPPPPPPPPPPPPPPPPPPP	0.00469717	62.213	55.846	_AAPAPAGS(ph)TT(ph)PSGSPPPDDGAGAGASGDGTFATFLK_	AAPAPAGS(0.456)T(0.456)T(0.469)PS(0.469)GS(0.148)PPPDDGAGAGAS(0.001)GDGTFATFLK
gi|472580947	RHTO_05638	100	RNA binding protein Nrd1	2	S	GKEKAAPAPAGSTTPSGSPPPDDGAGAGASG	X;X;X;X;X;X;X;X;X;X;X;Phospho (STY);X;Phospho (STY);X;Phospho (STY);X;X;X;X;X;X;X;X;X;X;X;X;X;X;X	XXXXPPPPPPPPPPPPPPPPPPPPPPPPPPP	5.84e-05	77.731	77.731	_AAPAPAGSTT(ph)PS(ph)GSPPPDDGAGAGASGDGTFATFLK_	AAPAPAGS(0.156)T(0.156)T(0.683)PS(0.503)GS(0.503)PPPDDGAGAGASGDGTFATFLK
gi|472580947	RHTO_05638	102	RNA binding protein Nrd1	2	S	EKAAPAPAGSTTPSGSPPPDDGAGAGASGDG	X;X;X;X;X;X;X;X;X;X;X;X;X;X;X;X;X;X;X;X;X;X;X;X;X;X;X;X;X;X;X	XXXXXXXXXXXXXXXXXXXXXXXXXXXXXXX	5.84e-05	77.731	77.731	_AAPAPAGSTT(ph)PS(ph)GSPPPDDGAGAGASGDGTFATFLK_	AAPAPAGS(0.156)T(0.156)T(0.683)PS(0.503)GS(0.503)PPPDDGAGAGASGDGTFATFLK
gi|472580950	RHTO_05641	103	crossover junction endonuclease MUS81	2	S	PARPRVQKATKKKRPSAASSDGEVDPREARR	X;X;X;X;X;X;X;X;X;X;X;X;X;X;X;Phospho (STY);X;X;X;Phospho (STY);X;X;X;X;X;X;X;X;X;X;X	XXXXXXXXXXXXPPPPPPPPPPPPPPPXXXX	0.00282651	87.062	79.143	_KRPS(ph)AASS(ph)DGEVDPR_	KRPS(0.984)AAS(0.091)S(0.925)DGEVDPR
gi|472580950	RHTO_05641	106	crossover junction endonuclease MUS81	2	S	PRVQKATKKKRPSAASSDGEVDPREARRQRL	X;X;X;X;X;X;X;X;X;X;X;X;X;X;X;X;X;X;X;X;X;X;X;X;X;X;X;X;X;X;X	XXXXXXXXXXXXXXXXXXXXXXXXXXXXXXX	0.00489907	75.912	75.912	_KRPS(ph)AASS(ph)DGEVDPR_	KRPS(0.568)AAS(0.568)S(0.864)DGEVDPR
gi|472580950	RHTO_05641	107	crossover junction endonuclease MUS81	2	S	RVQKATKKKRPSAASSDGEVDPREARRQRLT	X;X;X;X;X;X;X;X;X;X;X;Phospho (STY);X;X;X;Phospho (STY);X;X;X;X;X;X;X;X;X;X;X;X;X;X;X	XXXXXXXXPPPPPPPPPPPPPPPXXXXXXXX	0.00282651	87.062	79.143	_KRPS(ph)AASS(ph)DGEVDPR_	KRPS(0.984)AAS(0.091)S(0.925)DGEVDPR
gi|472580957	RHTO_05648	496	ATP synthase subunit alpha	2	S	LSPPISRLISPFAHVSTSRQSNDSHFAPTAS	X;X;X;X;X;X;X;X;X;X;X;X;X;X;X;Phospho (STY);Phospho (STY);X;X;X;X;X;X;X;X;X;X;X;X;X;X	XXXXXXXPPPPPPPPPPPPXXXXXXXXXXXX	0.00388279	95.854	95.854	_LISPFAHVS(ph)T(ph)SR_	LISPFAHVS(0.997)T(0.997)S(0.007)R
gi|472580964	RHTO_05655	19	MFS monocarboxylate transporter	2;3	S	ALEPIELDAITPAPPSPAHSRPSTPPSLKTP	X;X;X;X;X;X;X;X;X;X;X;X;X;X;X;Phospho (STY);X;X;X;X;X;X;Phospho (STY);X;X;X;X;X;X;X;X	PPPPPPPPPPPPPPPPPPPPPPPPPPPPPXX	0.000246567	67.877	47.175	_ALEPIELDAITPAPPS(ph)PAHSRPS(ph)TPPSLK_	ALEPIELDAIT(0.179)PAPPS(0.661)PAHS(0.17)RPS(0.397)T(0.397)PPS(0.195)LK
gi|472580964	RHTO_05655	23	MFS monocarboxylate transporter	2;3	S	IELDAITPAPPSPAHSRPSTPPSLKTPTSSY	X;X;X;X;X;X;X;X;X;X;X;X;X;X;X;Phospho (STY);X;X;X;X;X;X;Phospho (STY);X;X;X;X;X;X;X;X	PPPPPPPPPPPPPPPPPPPPPPPPPXXXXXX	0.000246567	67.877	51.398	_ALEPIELDAITPAPPSPAHS(ph)RPSTPPS(ph)LK_	ALEPIELDAIT(0.001)PAPPS(0.159)PAHS(0.693)RPS(0.36)T(0.36)PPS(0.427)LK
gi|472580964	RHTO_05655	26	MFS monocarboxylate transporter	2;3	S	DAITPAPPSPAHSRPSTPPSLKTPTSSYPPS	X;X;X;X;X;X;X;X;Phospho (STY);X;X;X;X;X;X;Phospho (STY);Phospho (STY);X;X;Phospho (STY);X;X;X;X;X;X;X;X;X;X;X	PPPPPPPPPPPPPPPPPPPPPPXXXXXXXXX	5.39e-05	77.693	77.693	_ALEPIELDAITPAPPSPAHSRPS(ph)T(ph)PPS(ph)LK_	ALEPIELDAIT(0.002)PAPPS(0.536)PAHS(0.527)RPS(0.675)T(0.675)PPS(0.585)LK
gi|472580964	RHTO_05655	30	MFS monocarboxylate transporter	2;3	S	PAPPSPAHSRPSTPPSLKTPTSSYPPSEILP	X;X;X;X;X;X;X;X;Phospho (STY);X;X;Phospho (STY);Phospho (STY);X;X;Phospho (STY);X;X;X;X;X;X;X;X;X;X;X;X;X;X;X	PPPPPPPPPPPPPPPPPPXXXXXXXXXXXXX	5.39e-05	77.693	65.901	_ALEPIELDAITPAPPSPAHSRPST(ph)PPS(ph)LK_	ALEPIELDAIT(0.001)PAPPS(0.507)PAHS(0.166)RPS(0.141)T(0.428)PPS(0.757)LK
gi|472580988	RHTO_05679	42	thiamine biosynthetic enzyme	2;3;4;5	S	ADDLKAAVASTELPASPPDSDASSDVDSARK	X;X;X;X;X;X;X;X;X;X;X;X;X;X;X;Phospho (STY);X;X;X;Phospho (STY);X;X;Phospho (STY);Phospho (STY);X;X;X;Phospho (STY);X;X;X	XXXXXPPPPPPPPPPPPPPPPPPPPPPPPPP	8.87e-142	226.23	215.91	_AAVASTELPAS(ph)PPDS(ph)DASS(ph)DVDSAR_	AAVASTELPAS(1)PPDS(1)DAS(0.091)S(0.908)DVDS(0.001)AR
gi|472580988	RHTO_05679	46	thiamine biosynthetic enzyme	2;3;4;5	S	KAAVASTELPASPPDSDASSDVDSARKVGGD	X;X;X;X;X;X;X;X;X;X;X;Phospho (STY);X;X;X;Phospho (STY);X;X;Phospho (STY);Phospho (STY);X;X;X;Phospho (STY);X;X;X;X;X;X;X	XPPPPPPPPPPPPPPPPPPPPPPPPPPXXXX	7.44e-110	215.91	108.45	_AAVASTELPAS(ph)PPDS(ph)DAS(ph)S(ph)DVDS(ph)ARK_	AAVASTELPAS(1)PPDS(1)DAS(1)S(1)DVDS(1)ARK
gi|472580988	RHTO_05679	49	thiamine biosynthetic enzyme	1;2;3;4;5	S	VASTELPASPPDSDASSDVDSARKVGGDGAT	X;X;X;X;X;X;X;X;Phospho (STY);X;X;X;Phospho (STY);X;X;Phospho (STY);Phospho (STY);X;X;X;Phospho (STY);X;X;X;X;X;X;X;X;X;X	PPPPPPPPPPPPPPPPPPPPPPPPXXXXXXX	7.69e-74	188.86	108.45	_AAVASTELPAS(ph)PPDS(ph)DAS(ph)S(ph)DVDS(ph)ARK_	AAVASTELPAS(1)PPDS(1)DAS(1)S(1)DVDS(1)ARK
gi|472580988	RHTO_05679	50	thiamine biosynthetic enzyme	1;2;3;4;5	S	ASTELPASPPDSDASSDVDSARKVGGDGATW	X;X;X;X;X;X;X;Phospho (STY);X;X;X;Phospho (STY);X;X;Phospho (STY);Phospho (STY);X;X;X;Phospho (STY);X;X;X;X;X;X;X;X;X;X;X	PPPPPPPPPPPPPPPPPPPPPPPXXXXXXXX	8.87e-142	226.23	108.45	_AAVASTELPAS(ph)PPDS(ph)DAS(ph)S(ph)DVDS(ph)ARK_	AAVASTELPAS(1)PPDS(1)DAS(1)S(1)DVDS(1)ARK
gi|472580988	RHTO_05679	54	thiamine biosynthetic enzyme	1;2;3;4;5	S	LPASPPDSDASSDVDSARKVGGDGATWAGLK	X;X;X;Phospho (STY);X;X;X;Phospho (STY);X;X;Phospho (STY);Phospho (STY);X;X;X;Phospho (STY);X;X;X;X;X;X;X;X;X;X;X;X;X;X;X	PPPPPPPPPPPPPPPPPPPXXXXXXXXXXXX	1.55e-88	225.88	108.45	_AAVASTELPAS(ph)PPDS(ph)DAS(ph)S(ph)DVDS(ph)ARK_	AAVASTELPAS(1)PPDS(1)DAS(1)S(1)DVDS(1)ARK
gi|472580988	RHTO_05679	23	thiamine biosynthetic enzyme	1	S	KSSIASLRVAGAHAPSSKNADDLKAAVASTE	X;X;X;X;X;Phospho (STY);X;X;X;X;X;X;X;X;X;Phospho (STY);X;X;X;X;X;X;X;X;X;X;X;X;X;X;X	XXXXXXXXPPPPPPPPPPPPPPPPXXXXXXX	0.00403687	102.89	102.89	_VAGAHAPS(ph)SKNADDLK_	VAGAHAPS(0.5)S(0.5)KNADDLK
gi|472580988	RHTO_05679	24	thiamine biosynthetic enzyme	1	S	SSIASLRVAGAHAPSSKNADDLKAAVASTEL	X;X;X;X;Phospho (STY);X;X;X;X;X;X;X;X;X;X;X;X;X;X;X;X;X;X;X;X;X;X;X;X;X;X	XXXXXXXXXXXXXXXXXXXXXXXXXXXXXXX	0.00403687	102.89	102.89	_VAGAHAPS(ph)SKNADDLK_	VAGAHAPS(0.5)S(0.5)KNADDLK
gi|472580991	RHTO_05682	45	glycosyltransferase family 90 protein	1	S	AYSGFEPYADSPRIGSPDSSKSDSPLLKTPR	X;X;X;X;X;X;X;X;X;X;X;X;X;X;X;Phospho (STY);X;X;X;X;X;X;X;X;X;X;X;X;X;X;X	XXXXXXXXXXXXXPPPPPPPPPPPPPPPXXX	6.77e-12	171.98	171.98	_IGS(ph)PDSSKSDSPLLK_	IGS(1)PDSSKSDSPLLK
gi|472580994	RHTO_05685	235	proliferating cell nuclear antigen	1	S	EEEDEDGDVKPKISGSDDEDDDAPAKSKAGK	X;X;X;X;X;X;X;X;X;X;X;X;X;X;X;Phospho (STY);X;X;X;X;X;X;X;X;X;X;X;X;X;X;X	XXXXXXXXXXXXPPPPPPPPPPPPPPPPXXX	0.00385338	108.77	108.77	_ISGS(ph)DDEDDDAPAKSK_	IS(0.031)GS(0.969)DDEDDDAPAKSK
gi|472580994	RHTO_05685	258	proliferating cell nuclear antigen	1	S	PAKSKAGKKRKAVEDSEEEEGADENGEEASS	X;X;X;X;X;X;X;X;X;X;X;X;X;X;X;Phospho (STY);X;X;X;X;X;X;X;X;X;X;X;X;X;X;X	XXXXXXXXXXPPPPPPPPPPPPPPPPPPPPP	1.99e-05	88.755	83.395	_KAVEDS(ph)EEEEGADENGEEASSPK_	KAVEDS(1)EEEEGADENGEEASSPK
gi|472580999	RHTO_05690	184	transcription elongation regulator 1	1	S	EREQREKEEAEAKSASPLSGKKRKAADEDEA	X;X;X;X;X;X;X;X;X;X;X;X;X;X;X;Phospho (STY);X;X;X;X;X;X;X;X;X;X;X;X;X;X;X	XXXXXXXXXXXXXPPPPPPPPPXXXXXXXXX	0.00772702	80.979	80.706	_SAS(ph)PLSGK_	SAS(0.999)PLS(0.001)GK
gi|472581004	RHTO_05695	17	hypothetical protein	4;5	S	LATTLVAAVALAHTISAVSPAERKDKNSLFR	X;X;Phospho (STY);Phospho (STY);X;X;X;X;X;X;X;X;X;Phospho (STY);X;Phospho (STY);X;X;Phospho (STY);X;X;X;X;X;X;X;X;X;X;X;X	PPPPPPPPPPPPPPPPPPPPPPPPXXXXXXX	0.00504243	36.923	33.833	_(ac)MLAT(ph)T(ph)LVAAVALAHT(ph)IS(ph)AVS(ph)PAERK_	MLAT(1)T(1)LVAAVALAHT(1)IS(1)AVS(1)PAERK
gi|472581004	RHTO_05695	20	hypothetical protein	4;5	S	TLVAAVALAHTISAVSPAERKDKNSLFRRQS	Phospho (STY);X;X;X;X;X;X;X;X;X;Phospho (STY);X;Phospho (STY);X;X;Phospho (STY);X;X;X;X;X;X;X;X;X;X;X;X;X;X;X	PPPPPPPPPPPPPPPPPPPPPXXXXXXXXXX	0.00504243	36.923	33.833	_(ac)MLAT(ph)T(ph)LVAAVALAHT(ph)IS(ph)AVS(ph)PAERK_	MLAT(1)T(1)LVAAVALAHT(1)IS(1)AVS(1)PAERK
gi|472581035	RHTO_05537	1387	protein transporter	1	S	ARQGAASPFGRQNAASPFQHASRQDGPAFNY	X;X;X;X;X;X;Phospho (STY);X;X;X;X;X;X;X;X;Phospho (STY);X;X;X;X;X;X;X;X;X;X;X;X;X;X;X	XXXXXXXXXXXPPPPPPPPPPPPXXXXXXXX	0.00182052	94.487	94.487	_QNAAS(ph)PFQHASR_	QNAAS(0.999)PFQHAS(0.001)R
gi|472581048	RHTO_05550	997	sulfate transporter family protein	1	S	LPKSDLDSDIEGFASSPRANHLRIAARETMS	X;X;X;X;X;X;X;X;X;X;X;X;X;X;X;Phospho (STY);X;X;X;X;X;X;X;X;X;X;X;X;X;X;X	XXXPPPPPPPPPPPPPPPXXXXXXXXXXXXX	1.4e-08	155.66	155.66	_SDLDSDIEGFASS(ph)PR_	SDLDSDIEGFAS(0.017)S(0.983)PR
gi|472581051	RHTO_05553	1115	Pleckstrin homology domain containing protein	2	S	STSAFDRRPSVHRKASDSPSSSPAGTPVLGR	X;X;X;X;X;X;X;X;X;X;X;X;X;X;X;Phospho (STY);X;X;X;Phospho (STY);X;X;X;X;X;X;X;X;X;X;X	XXXXXXXXXXXXXPPPPPPPPPPPPPPPPPP	0.00696832	68.173	50.858	_KAS(ph)DSPS(ph)SSPAGTPVLGR_	KAS(0.673)DS(0.505)PS(0.57)S(0.131)S(0.119)PAGT(0.001)PVLGR
gi|472581051	RHTO_05553	1117	Pleckstrin homology domain containing protein	2	S	SAFDRRPSVHRKASDSPSSSPAGTPVLGRRP	X;X;X;X;X;X;X;X;X;X;X;X;X;X;X;X;X;X;X;X;X;X;X;X;X;X;X;X;X;X;X	XXXXXXXXXXXXXXXXXXXXXXXXXXXXXXX	0.00696832	68.173	68.173	_KAS(ph)DSPS(ph)SSPAGTPVLGR_	KAS(0.486)DS(0.486)PS(0.348)S(0.348)S(0.33)PAGTPVLGR
gi|472581051	RHTO_05553	1119	Pleckstrin homology domain containing protein	2	S	FDRRPSVHRKASDSPSSSPAGTPVLGRRPSL	X;X;X;X;X;X;X;X;X;X;X;Phospho (STY);X;X;X;Phospho (STY);X;X;X;X;X;X;X;X;X;X;X;X;X;X;X	XXXXXXXXXPPPPPPPPPPPPPPPPPPXXXX	0.00696832	68.173	50.858	_KAS(ph)DSPS(ph)SSPAGTPVLGR_	KAS(0.673)DS(0.505)PS(0.57)S(0.131)S(0.119)PAGT(0.001)PVLGR
gi|472581051	RHTO_05553	1120	Pleckstrin homology domain containing protein		S	DRRPSVHRKASDSPSSSPAGTPVLGRRPSLH	X;X;X;X;X;X;X;X;X;X;X;X;X;X;X;X;X;X;X;X;X;X;X;X;X;X;X;X;X;X;X	XXXXXXXXXXXXXXXXXXXXXXXXXXXXXXX	0.00696832	68.173	61.165	_KAS(ph)DSPS(ph)SSPAGTPVLGR_	KAS(0.481)DS(0.481)PS(0.465)S(0.465)S(0.108)PAGT(0.001)PVLGR
gi|472581051	RHTO_05553	1121	Pleckstrin homology domain containing protein		S	RRPSVHRKASDSPSSSPAGTPVLGRRPSLHP	X;X;X;X;X;X;X;X;X;X;X;X;X;X;X;X;X;X;X;X;X;X;X;X;X;X;X;X;X;X;X	XXXXXXXXXXXXXXXXXXXXXXXXXXXXXXX	0.00696832	68.173	68.173	_KAS(ph)DSPS(ph)SSPAGTPVLGR_	KAS(0.486)DS(0.486)PS(0.348)S(0.348)S(0.33)PAGTPVLGR
gi|472581056	RHTO_05558	121	G protein-coupled receptor 89A	2	S	SKRASPSAAVPDRRDSLSPGQTGVSTAGRAY	X;X;X;X;X;X;X;X;X;X;X;X;X;X;X;Phospho (STY);X;Phospho (STY);X;X;X;X;X;X;X;X;X;X;X;X;X	XXXPPPPPPPPPPPPPPPPPPPPPPPPPPXX	0.00358015	73.603	73.603	_ASPSAAVPDRRDS(ph)LS(ph)PGQTGVSTAGR_	ASPSAAVPDRRDS(0.958)LS(0.958)PGQT(0.043)GVS(0.021)T(0.021)AGR
gi|472581056	RHTO_05558	123	G protein-coupled receptor 89A	2	S	RASPSAAVPDRRDSLSPGQTGVSTAGRAYTR	X;X;X;X;X;X;X;X;X;X;X;X;X;Phospho (STY);X;Phospho (STY);X;X;X;X;X;X;X;X;X;X;X;X;X;X;X	XPPPPPPPPPPPPPPPPPPPPPPPPPPXXXX	0.00358015	73.603	73.603	_ASPSAAVPDRRDS(ph)LS(ph)PGQTGVSTAGR_	ASPSAAVPDRRDS(0.958)LS(0.958)PGQT(0.043)GVS(0.021)T(0.021)AGR
gi|472581065	RHTO_05567	69	conserved hypothetical protein	1;2;6	S	DQLDRPKPGHIARKPSVDTVTSRSSVSSLQA	X;X;X;X;X;X;X;X;X;X;X;X;X;X;X;Phospho (STY);X;X;Phospho (STY);X;Phospho (STY);Phospho (STY);X;Phospho (STY);Phospho (STY);X;Phospho (STY);Phospho (STY);X;X;X	XXXXXXXXXXXXXPPPPPPPPPPPPPPPPPP	0.00325767	125.73	84.753	_KPS(ph)VDTVTSR_	KPS(1)VDTVTSR
gi|472581065	RHTO_05567	75	conserved hypothetical protein	2;6	S	KPGHIARKPSVDTVTSRSSVSSLQAPTCKLN	X;X;X;X;X;X;X;X;X;Phospho (STY);X;X;Phospho (STY);X;Phospho (STY);Phospho (STY);X;Phospho (STY);Phospho (STY);X;Phospho (STY);X;X;X;X;X;X;X;X;X;X	XXXXXXXPPPPPPPPPPPPPPPPPPPPPPXX	0.00325767	125.73	125.73	_KPS(ph)VDTVTS(ph)R_	KPS(1)VDTVT(0.197)S(0.803)R
gi|472581065	RHTO_05567	77	conserved hypothetical protein	2;3;6	S	GHIARKPSVDTVTSRSSVSSLQAPTCKLNSS	X;X;X;X;X;X;X;Phospho (STY);X;X;Phospho (STY);X;Phospho (STY);Phospho (STY);X;Phospho (STY);Phospho (STY);X;Phospho (STY);Phospho (STY);X;X;X;X;X;X;X;X;X;X;X	XXXXXPPPPPPPPPPPPPPPPPPPPPPXXXX	0.00339836	78.708	69.256	_KPS(ph)VDTVT(ph)SRS(ph)S(ph)VS(ph)S(ph)LQAPTCK_	KPS(0.99)VDT(0.135)VT(0.487)S(0.487)RS(0.954)S(0.981)VS(0.981)S(0.982)LQAPT(0.002)CK
gi|472581065	RHTO_05567	78	conserved hypothetical protein	2;3;6	S	HIARKPSVDTVTSRSSVSSLQAPTCKLNSSS	X;X;X;X;X;X;Phospho (STY);X;X;Phospho (STY);X;Phospho (STY);Phospho (STY);X;Phospho (STY);Phospho (STY);X;Phospho (STY);Phospho (STY);X;X;X;X;X;X;X;X;X;X;X;X	XXXXPPPPPPPPPPPPPPPPPPPPPPXXXXX	0.00339836	96.247	69.256	_KPS(ph)VDTVT(ph)SRS(ph)S(ph)VS(ph)S(ph)LQAPTCK_	KPS(0.99)VDT(0.135)VT(0.487)S(0.487)RS(0.954)S(0.981)VS(0.981)S(0.982)LQAPT(0.002)CK
gi|472581065	RHTO_05567	80	conserved hypothetical protein	2;6	S	ARKPSVDTVTSRSSVSSLQAPTCKLNSSSPA	X;X;X;X;Phospho (STY);X;X;Phospho (STY);X;Phospho (STY);Phospho (STY);X;Phospho (STY);Phospho (STY);X;Phospho (STY);Phospho (STY);X;X;X;X;X;X;X;X;X;X;X;X;X;X	XXPPPPPPPPPPPPPPPPPPPPPPXXXXXXX	0.00339836	96.247	69.256	_KPS(ph)VDTVT(ph)SRS(ph)S(ph)VS(ph)S(ph)LQAPTCK_	KPS(0.99)VDT(0.135)VT(0.487)S(0.487)RS(0.954)S(0.981)VS(0.981)S(0.982)LQAPT(0.002)CK
gi|472581065	RHTO_05567	81	conserved hypothetical protein	6	S	RKPSVDTVTSRSSVSSLQAPTCKLNSSSPAS	X;X;X;Phospho (STY);X;X;Phospho (STY);X;Phospho (STY);Phospho (STY);X;Phospho (STY);Phospho (STY);X;Phospho (STY);Phospho (STY);X;X;X;X;X;X;X;X;X;X;X;X;X;X;X	XPPPPPPPPPPPPPPPPPPPPPPXXXXXXXX	0.00339836	69.256	69.256	_KPS(ph)VDTVT(ph)SRS(ph)S(ph)VS(ph)S(ph)LQAPTCK_	KPS(0.99)VDT(0.135)VT(0.487)S(0.487)RS(0.954)S(0.981)VS(0.981)S(0.982)LQAPT(0.002)CK
gi|472581065	RHTO_05567	443	conserved hypothetical protein	2;3	S	QADSEREPRRPSLVESIGSSASLGDLRATSN	X;X;X;X;X;X;X;X;X;X;X;X;X;X;X;Phospho (STY);X;X;Phospho (STY);X;X;Phospho (STY);X;X;X;X;X;X;X;X;X	XXXXXXXXXPPPPPPPPPPPPPPPPPPXXXX	6.18e-29	188.73	75.103	_RPSLVES(ph)IGS(ph)SAS(ph)LGDLR_	RPS(0.004)LVES(0.947)IGS(0.814)S(0.337)AS(0.898)LGDLR
gi|472581065	RHTO_05567	446	conserved hypothetical protein	2;3	S	SEREPRRPSLVESIGSSASLGDLRATSNMPV	X;X;X;X;X;X;X;X;X;X;X;X;Phospho (STY);X;X;Phospho (STY);Phospho (STY);X;Phospho (STY);X;X;X;X;X;X;X;X;X;X;X;X	XXXXXXPPPPPPPPPPPPPPPPPPXXXXXXX	6.18e-29	188.73	80.361	_RPSLVES(ph)IGS(ph)SAS(ph)LGDLR_	RPS(0.154)LVES(0.846)IGS(0.949)S(0.099)AS(0.953)LGDLR
gi|472581065	RHTO_05567	447	conserved hypothetical protein	2;3	S	EREPRRPSLVESIGSSASLGDLRATSNMPVF	X;X;X;X;X;X;X;X;X;X;X;X;X;X;Phospho (STY);Phospho (STY);X;X;X;X;X;X;X;X;X;X;X;X;X;X;X	XXXXXPPPPPPPPPPPPPPPPPPXXXXXXXX	0.00281246	95.996	83.251	_RPSLVESIGS(ph)S(ph)ASLGDLR_	RPSLVESIGS(0.723)S(0.77)AS(0.507)LGDLR
gi|472581065	RHTO_05567	449	conserved hypothetical protein	2;3	S	EPRRPSLVESIGSSASLGDLRATSNMPVFGA	X;X;X;X;X;X;X;X;X;Phospho (STY);X;X;Phospho (STY);X;X;Phospho (STY);X;X;X;X;X;X;X;X;X;X;X;X;X;X;X	XXXPPPPPPPPPPPPPPPPPPXXXXXXXXXX	6.18e-29	188.73	188.73	_RPSLVES(ph)IGS(ph)SAS(ph)LGDLR_	RPSLVES(0.885)IGS(0.938)S(0.178)AS(1)LGDLR
gi|472581065	RHTO_05567	35	conserved hypothetical protein	1	S	AMGNALRRVSLVRRPSSENTTPTSSALGDGK	X;X;X;X;X;X;X;X;X;X;X;X;X;X;X;Phospho (STY);X;X;X;X;X;X;X;X;X;X;X;X;X;X;X	XXXXXXXXXXXXXPPPPPPPPPPPPPPPPPP	3.56e-05	118.36	102.45	_RPS(ph)SENTTPTSSALGDGKR_	RPS(0.96)S(0.038)ENT(0.001)T(0.001)PTSSALGDGKR
gi|472581065	RHTO_05567	36	conserved hypothetical protein		S	MGNALRRVSLVRRPSSENTTPTSSALGDGKR	X;X;X;X;X;X;X;X;X;X;X;X;X;X;X;X;X;X;X;X;X;X;X;X;X;X;X;X;X;X;X	XXXXXXXXXXXXXXXXXXXXXXXXXXXXXXX	0.00168253	101.01	88.555	_RPS(ph)SENTTPTSSALGDGKR_	RPS(0.5)S(0.5)ENTTPTSSALGDGKR
gi|472581067	RHTO_05569	173	RNA binding protein	1	S	NTPHQWAGTNDQRSGSYQTAHGANAGKSGHG	X;X;X;X;X;X;X;X;X;X;X;X;X;X;X;Phospho (STY);X;X;X;X;X;X;X;X;X;X;X;X;X;X;X	XXXXXXXXXXXXXPPPPPPPPPPPPPPXXXX	0.0122168	70.783	70.783	_SGS(ph)YQTAHGANAGK_	S(0.052)GS(0.929)Y(0.004)QT(0.015)AHGANAGK
gi|472581072	RHTO_05574	917	translation initiation factor eIF-3 subunit 10	1	S	ALARRAGGGAAQRSASGPAPVGSAAWRASRD	X;X;X;X;X;X;X;X;X;X;X;X;X;X;X;Phospho (STY);X;X;X;X;X;X;X;X;X;X;X;X;X;X;X	XXXXXXXXXXXXXPPPPPPPPPPPPPPXXXX	0.000139437	120.9	120.9	_SAS(ph)GPAPVGSAAWR_	SAS(1)GPAPVGSAAWR
gi|472581072	RHTO_05574	1000	translation initiation factor eIF-3 subunit 10	1;2;4	S	RPRLNLAPRTAPRPESPAAAPSPPSESRSST	X;X;X;X;X;X;X;X;X;X;X;X;X;X;X;Phospho (STY);X;X;X;X;X;Phospho (STY);X;X;X;X;Phospho (STY);X;Phospho (STY);Phospho (STY);X	XXXXXXXXXPPPPPPPPPPPPPPPPPPPPPP	8.29e-28	176.86	176.86	_TAPRPES(ph)PAAAPS(ph)PPSESR_	TAPRPES(1)PAAAPS(0.991)PPS(0.008)ES(0.001)R
gi|472581072	RHTO_05574	1006	translation initiation factor eIF-3 subunit 10	1;2	S	APRTAPRPESPAAAPSPPSESRSSTPAGGRY	X;X;X;X;X;X;X;X;X;Phospho (STY);X;X;X;X;X;Phospho (STY);X;X;X;X;X;X;X;X;X;X;X;X;X;X;X	XXXPPPPPPPPPPPPPPPPPPPXXXXXXXXX	8.29e-28	176.86	131.48	_TAPRPESPAAAPS(ph)PPSESR_	TAPRPESPAAAPS(0.997)PPS(0.001)ES(0.002)R
gi|472581072	RHTO_05574	1009	translation initiation factor eIF-3 subunit 10	1;2	S	TAPRPESPAAAPSPPSESRSSTPAGGRYQPP	X;X;X;X;X;X;X;X;X;X;X;X;X;X;X;Phospho (STY);X;Phospho (STY);X;X;X;X;X;X;X;X;X;X;X;X;X	PPPPPPPPPPPPPPPPPPPPPPPPPPPXXXX	6.11e-19	164.65	124.46	_TAPRPESPAAAPSPPS(ph)ESR_	TAPRPESPAAAPS(0.003)PPS(0.992)ES(0.005)R
gi|472581072	RHTO_05574	1011	translation initiation factor eIF-3 subunit 10	4	S	PRPESPAAAPSPPSESRSSTPAGGRYQPPGA	X;X;X;X;Phospho (STY);X;X;X;X;X;X;X;X;Phospho (STY);X;Phospho (STY);X;Phospho (STY);Phospho (STY);Phospho (STY);X;X;X;X;X;X;X;X;X;X;X	PPPPPPPPPPPPPPPPPPPPPPPPPXXXXXX	8.39e-10	116.35	56.247	_TAPRPES(ph)PAAAPSPPSES(ph)RS(ph)S(ph)TPAGGR_	T(0.245)APRPES(0.755)PAAAPS(0.271)PPS(0.267)ES(0.64)RS(0.607)S(0.607)T(0.607)PAGGR
gi|472581072	RHTO_05574	1013	translation initiation factor eIF-3 subunit 10	2;4	S	PESPAAAPSPPSESRSSTPAGGRYQPPGARG	X;X;Phospho (STY);X;X;X;X;X;Phospho (STY);X;X;Phospho (STY);X;Phospho (STY);X;Phospho (STY);Phospho (STY);X;X;X;X;X;X;X;X;X;X;X;X;X;X	PPPPPPPPPPPPPPPPPPPPPPPXXXXXXXX	8.39e-10	116.35	56.247	_TAPRPES(ph)PAAAPSPPSES(ph)RS(ph)S(ph)TPAGGR_	T(0.245)APRPES(0.755)PAAAPS(0.271)PPS(0.267)ES(0.64)RS(0.607)S(0.607)T(0.607)PAGGR
gi|472581072	RHTO_05574	1014	translation initiation factor eIF-3 subunit 10	2;4	S	ESPAAAPSPPSESRSSTPAGGRYQPPGARGG	X;Phospho (STY);X;X;X;X;X;Phospho (STY);X;X;Phospho (STY);X;Phospho (STY);X;Phospho (STY);Phospho (STY);X;X;X;X;X;X;X;X;X;X;X;X;X;X;X	PPPPPPPPPPPPPPPPPPPPPPXXXXXXXXX	8.39e-10	116.35	56.247	_TAPRPES(ph)PAAAPSPPSES(ph)RS(ph)S(ph)TPAGGR_	T(0.245)APRPES(0.755)PAAAPS(0.271)PPS(0.267)ES(0.64)RS(0.607)S(0.607)T(0.607)PAGGR
gi|472581073	RHTO_05575	518	ribosome biogenesis protein BMS1	2	S	SASGGERTEDVAYADSDSDLDLILDDDERAA	X;X;X;X;X;X;X;X;X;X;X;X;X;X;X;Phospho (STY);X;Phospho (STY);X;X;X;X;X;X;X;X;X;X;X;X;X	PPPPPPPPPPPPPPPPPPPPPPPPPPPPPXX	3.26e-19	127.53	127.53	_ASASGGERTEDVAYADS(ph)DS(ph)DLDLILDDDER_	ASASGGERTEDVAYADS(1)DS(1)DLDLILDDDER
gi|472581073	RHTO_05575	520	ribosome biogenesis protein BMS1	2	S	SGGERTEDVAYADSDSDLDLILDDDERAARD	X;X;X;X;X;X;X;X;X;X;X;X;X;Phospho (STY);X;Phospho (STY);X;X;X;X;X;X;X;X;X;X;X;X;X;X;X	PPPPPPPPPPPPPPPPPPPPPPPPPPPXXXX	3.26e-19	127.53	127.53	_ASASGGERTEDVAYADS(ph)DS(ph)DLDLILDDDER_	ASASGGERTEDVAYADS(1)DS(1)DLDLILDDDER
gi|472581078	RHTO_05580	119	conserved hypothetical protein	1	S	ILEAELAVRELVRRASPSLRADGALKKTSGR	X;X;X;X;X;X;X;X;X;X;X;X;X;X;X;Phospho (STY);X;X;X;X;X;X;X;X;X;X;X;X;X;X;X	XXXXXXXXXXXXXPPPPPPPXXXXXXXXXXX	0.00438046	99.815	99.815	_RAS(ph)PSLR_	RAS(0.975)PS(0.025)LR
gi|472581082	RHTO_05584	870	nuclear pore complex protein Nup160	1	S	PPTAEALAAVQKQLGSPGDDGVLERFGELRM	X;X;X;X;X;X;X;X;X;X;X;X;X;X;X;Phospho (STY);X;X;X;X;X;X;X;X;X;X;X;X;X;X;X	XXXXXXXXXXXXPPPPPPPPPPPPPXXXXXX	5.51e-41	220.64	152.37	_QLGS(ph)PGDDGVLER_	QLGS(1)PGDDGVLER
gi|472581099	RHTO_05601	991	integral membrane protein	1	S	RRPSHTADLALARHTSPLADGGPAQRQPSRP	X;X;X;X;X;X;X;X;X;X;X;X;X;X;X;Phospho (STY);X;X;X;X;X;X;X;X;X;X;X;X;X;X;X	XXXXXXXXXXXXXPPPPPPPPPPPPPXXXXX	6.75e-22	196.8	196.8	_HTS(ph)PLADGGPAQR_	HTS(1)PLADGGPAQR
gi|472581113	RHTO_05615	7	RNA-processing, Lsm domain protein	1	S	_________MTARTASPALANTSAGGAPARK	X;X;X;X;X;X;X;X;X;X;X;X;X;X;X;Phospho (STY);X;X;X;X;X;X;X;X;X;X;X;X;X;X;X	XXXXXXXXXXXXXPPPPPPPPPPPPPPPPPP	1.72e-07	128.71	128.71	_TAS(ph)PALANTSAGGAPARK_	TAS(1)PALANTSAGGAPARK
gi|472581116	RHTO_05618	354	conserved hypothetical protein		S	HPSSLAYAKSFVGSTSPKRRKGKSLGSPLQP	X;X;X;X;X;X;X;X;X;X;X;X;X;X;X;X;X;X;X;X;X;X;X;X;X;X;X;X;X;X;X	XXXXXXXXXXXXXXXXXXXXXXXXXXXXXXX	0.00248339	134.3	134.3	_SFVGST(ph)SPK_	SFVGS(0.01)T(0.495)S(0.495)PK
gi|472581139	RHTO_05456	597	mRNA-decapping enzyme subunit 2	1	S	KHDALLRALLTVAAKSPPRKADLELEQSSSF	X;X;X;X;X;X;X;X;X;X;X;X;X;X;X;Phospho (STY);X;X;X;X;X;X;X;X;X;X;X;X;X;X;X	XXXXXXXPPPPPPPPPPPPXXXXXXXXXXXX	0.000959048	131.56	131.56	_ALLTVAAKS(ph)PPR_	ALLT(0.001)VAAKS(0.999)PPR
gi|472581148	RHTO_05465	333	tRNA (adenine-N1-)-methyltransferase catalytic subunit	1;2	S	PDSKRSKPTAADSSASTPAPQGRRPRSEREF	X;X;X;X;X;Phospho (STY);X;X;X;X;X;X;X;X;X;Phospho (STY);X;X;X;X;X;X;X;X;X;X;X;X;X;X;X	XXXXXPPPPPPPPPPPPPPPPPPXXXXXXXX	1.62e-07	130.89	62.303	_S(ph)KPTAADSSAS(ph)TPAPQGR_	S(0.45)KPT(0.051)AADS(0.232)S(0.271)AS(0.947)T(0.048)PAPQGR
gi|472581155	RHTO_05472	555	L-ornithine N5-oxygenase		S	SSSKPSTAPTSPPCPSSPTSKRSPSSTPSYK	Phospho (STY);X;X;X;X;X;X;X;X;X;X;X;X;X;X;Phospho (STY);X;X;X;X;X;X;Phospho (STY);X;Phospho (STY);Phospho (STY);X;X;X;X;X	PPPPPPPPPPPPPPPPPPPPPXXXXXXXXXX	0.0105927	60.621	51.524	_SSSKPSTAPTSPPCPS(ph)SPTSK_	SSSKPSTAPTS(0.001)PPCPS(0.403)S(0.299)PT(0.072)S(0.224)K
gi|472581155	RHTO_05472	556	L-ornithine N5-oxygenase		S	SSKPSTAPTSPPCPSSPTSKRSPSSTPSYKV	X;X;X;X;X;X;X;X;X;X;X;X;X;X;X;X;X;X;X;X;X;Phospho (STY);X;Phospho (STY);Phospho (STY);X;X;X;X;X;X	XXXXXXXXXXXXXXXXXXXXXXXXXXXXXXX	0.0105927	60.621	60.621	_SSSKPSTAPTSPPCPS(ph)SPTSK_	SSSKPSTAPTSPPCPS(0.396)S(0.396)PT(0.104)S(0.104)K
gi|472581155	RHTO_05472	559	L-ornithine N5-oxygenase		S	PSTAPTSPPCPSSPTSKRSPSSTPSYKVLEN	X;X;X;X;X;X;X;X;X;X;X;X;X;X;X;X;X;X;Phospho (STY);X;Phospho (STY);Phospho (STY);X;X;X;X;X;X;X;X;X	XXXXXXXXXXXXXXXXXXXXXXXXXXXXXXX	0.0022291	70.555	66.777	_SSSKPSTAPTSPPCPSSPT(ph)SK_	SSSKPSTAPTSPPCPS(0.202)S(0.202)PT(0.298)S(0.298)K
gi|472581160	RHTO_05477	1172	nuclear pore complex protein Nup214	1	S	SPKEKSTTKSLFGFASSPPDEKKRSQPAGSL	X;X;X;X;X;X;X;X;X;X;X;X;X;X;X;Phospho (STY);X;X;X;X;X;X;X;X;X;X;X;X;X;X;X	XXXXXXXXXPPPPPPPPPPPPPXXXXXXXXX	1.1e-14	180.62	136.63	_SLFGFAS(ph)SPPDEK_	SLFGFAS(0.896)S(0.104)PPDEK
gi|472581160	RHTO_05477	1173	nuclear pore complex protein Nup214	1	S	PKEKSTTKSLFGFASSPPDEKKRSQPAGSLL	X;X;X;X;X;X;X;X;X;X;X;X;X;X;X;Phospho (STY);X;X;X;X;X;X;X;X;X;X;X;X;X;X;X	XXXXXXXXPPPPPPPPPPPPPXXXXXXXXXX	5.57e-53	229.68	102.97	_SLFGFASS(ph)PPDEK_	SLFGFAS(0.077)S(0.923)PPDEK
gi|472581160	RHTO_05477	1702	nuclear pore complex protein Nup214	1	S	ASNATPRRKLLQRSSSLALDERLQRSPALQP	X;Phospho (STY);X;X;Phospho (STY);X;X;X;X;X;X;X;X;X;X;Phospho (STY);X;X;X;X;X;X;X;X;X;X;X;X;X;X;X	XXXXXXXXXXXXXPPPPPPPPPXXXXXXXXX	0.000125836	145.09	145.09	_SSS(ph)LALDER_	SS(0.007)S(0.993)LALDER
gi|472581166	RHTO_05483	21	phosphoesterase, RecJ-like	1;2	S	LATATSSSPSKSTRRSPSPALDSTTVPQDAA	X;X;X;X;X;X;X;X;X;X;X;X;X;X;X;Phospho (STY);X;Phospho (STY);X;X;X;X;X;X;X;X;X;X;X;X;X	XXXXXXXXXXXPPPPPPPPPPPPPPPPPPPP	0.000915163	93.5	68.525	_RS(ph)PSPALDSTTVPQDAAGK_	RS(0.838)PS(0.151)PALDS(0.005)T(0.005)TVPQDAAGK
gi|472581166	RHTO_05483	23	phosphoesterase, RecJ-like	1;2	S	TATSSSPSKSTRRSPSPALDSTTVPQDAAGK	X;X;X;X;X;X;X;X;X;Phospho (STY);X;X;X;Phospho (STY);X;Phospho (STY);X;X;X;X;X;X;X;X;X;X;X;X;X;X;X	XXXXXXXXXPPPPPPPPPPPPPPPPPPPPPP	5.59e-05	113.49	113.49	_S(ph)TRRSPS(ph)PALDSTTVPQDAAGK_	S(0.396)T(0.396)RRS(0.287)PS(0.922)PALDSTTVPQDAAGK
gi|472581166	RHTO_05483	17	phosphoesterase, RecJ-like		S	PKRALATATSSSPSKSTRRSPSPALDSTTVP	X;X;X;X;X;X;X;X;X;X;X;X;X;X;X;Phospho (STY);X;X;X;Phospho (STY);X;Phospho (STY);X;X;X;X;X;X;X;X;X	XXXXXXXXXXXXXXXPPPPPPPPPPPPPPPP	5.59e-05	113.49	113.49	_S(ph)TRRSPS(ph)PALDSTTVPQDAAGK_	S(0.396)T(0.396)RRS(0.287)PS(0.922)PALDSTTVPQDAAGK
gi|472581173	RHTO_05490	22	tether containing UBX domain for GLUT4	5	S	QEPITMTSRLPGDAHSSPSPSPSPEPVAGPS	X;X;X;X;X;X;X;X;X;X;X;X;X;X;X;Phospho (STY);Phospho (STY);X;Phospho (STY);X;Phospho (STY);X;Phospho (STY);X;X;X;X;X;X;X;X	XXXXXXXXXPPPPPPPPPPPPPPPPPPPPPP	0.012059	43.103	43.103	_LPGDAHS(ph)S(ph)PS(ph)PS(ph)PS(ph)PEPVAGPSTATHTVQPAAGPAR_	LPGDAHS(0.916)S(0.916)PS(0.948)PS(0.95)PS(0.938)PEPVAGPS(0.077)T(0.075)AT(0.085)HT(0.094)VQPAAGPAR
gi|472581173	RHTO_05490	23	tether containing UBX domain for GLUT4	5	S	EPITMTSRLPGDAHSSPSPSPSPEPVAGPST	X;X;X;X;X;X;X;X;X;X;X;X;X;X;Phospho (STY);Phospho (STY);X;Phospho (STY);X;Phospho (STY);X;Phospho (STY);X;X;X;X;X;X;X;X;X	XXXXXXXXPPPPPPPPPPPPPPPPPPPPPPP	0.012059	43.103	43.103	_LPGDAHS(ph)S(ph)PS(ph)PS(ph)PS(ph)PEPVAGPSTATHTVQPAAGPAR_	LPGDAHS(0.916)S(0.916)PS(0.948)PS(0.95)PS(0.938)PEPVAGPS(0.077)T(0.075)AT(0.085)HT(0.094)VQPAAGPAR
gi|472581173	RHTO_05490	25	tether containing UBX domain for GLUT4	5	S	ITMTSRLPGDAHSSPSPSPSPEPVAGPSTAT	X;X;X;X;X;X;X;X;X;X;X;X;Phospho (STY);Phospho (STY);X;Phospho (STY);X;Phospho (STY);X;Phospho (STY);X;X;X;X;X;X;X;X;X;X;X	XXXXXXPPPPPPPPPPPPPPPPPPPPPPPPP	0.012059	43.103	43.103	_LPGDAHS(ph)S(ph)PS(ph)PS(ph)PS(ph)PEPVAGPSTATHTVQPAAGPAR_	LPGDAHS(0.916)S(0.916)PS(0.948)PS(0.95)PS(0.938)PEPVAGPS(0.077)T(0.075)AT(0.085)HT(0.094)VQPAAGPAR
gi|472581173	RHTO_05490	27	tether containing UBX domain for GLUT4	5	S	MTSRLPGDAHSSPSPSPSPEPVAGPSTATHT	X;X;X;X;X;X;X;X;X;X;Phospho (STY);Phospho (STY);X;Phospho (STY);X;Phospho (STY);X;Phospho (STY);X;X;X;X;X;X;X;X;X;X;X;X;X	XXXXPPPPPPPPPPPPPPPPPPPPPPPPPPP	0.012059	43.103	43.103	_LPGDAHS(ph)S(ph)PS(ph)PS(ph)PS(ph)PEPVAGPSTATHTVQPAAGPAR_	LPGDAHS(0.916)S(0.916)PS(0.948)PS(0.95)PS(0.938)PEPVAGPS(0.077)T(0.075)AT(0.085)HT(0.094)VQPAAGPAR
gi|472581173	RHTO_05490	29	tether containing UBX domain for GLUT4	5	S	SRLPGDAHSSPSPSPSPEPVAGPSTATHTVQ	X;X;X;X;X;X;X;X;Phospho (STY);Phospho (STY);X;Phospho (STY);X;Phospho (STY);X;Phospho (STY);X;X;X;X;X;X;X;X;X;X;X;X;X;X;X	XXPPPPPPPPPPPPPPPPPPPPPPPPPPPPP	0.012059	43.103	43.103	_LPGDAHS(ph)S(ph)PS(ph)PS(ph)PS(ph)PEPVAGPSTATHTVQPAAGPAR_	LPGDAHS(0.916)S(0.916)PS(0.948)PS(0.95)PS(0.938)PEPVAGPS(0.077)T(0.075)AT(0.085)HT(0.094)VQPAAGPAR
gi|472581182	RHTO_05499	127	DNA ligase	1;2	S	AAEKGVSPSKDKDAASPVASSSSAAKASTSA	X;X;X;X;X;X;Phospho (STY);X;X;X;X;X;X;X;X;Phospho (STY);X;X;X;X;X;X;X;X;X;X;X;X;X;X;X	XXXXPPPPPPPPPPPPPPPPPPPPPPXXXXX	3.36e-05	116.7	78.674	_DKDAAS(ph)PVASSSSAAK_	DKDAAS(1)PVASSSSAAK
gi|472581182	RHTO_05499	118	DNA ligase	2	S	KAKTSNGDAAAEKGVSPSKDKDAASPVASSS	X;X;X;X;X;X;X;X;X;X;X;X;X;X;X;Phospho (STY);X;X;X;X;X;X;X;X;Phospho (STY);X;X;X;X;X;X	XXXXXXXXXXXXXPPPPPPPPPPPPPPPPPP	0.00152374	82.765	81.341	_GVS(ph)PSKDKDAAS(ph)PVASSSSAAK_	GVS(0.994)PS(0.006)KDKDAAS(0.999)PVASSSSAAK
gi|472581182	RHTO_05499	120	DNA ligase	1	S	KTSNGDAAAEKGVSPSKDKDAASPVASSSSA	X;X;X;X;X;X;X;X;X;X;X;X;X;X;X;Phospho (STY);X;X;X;X;X;X;Phospho (STY);X;X;X;X;X;X;X;X	XXXXXXXXXXXPPPPPPPPPPPPPPPPPPPP	0.0083911	66.636	66.636	_GVSPS(ph)KDKDAASPVASSSSAAK_	GVS(0.173)PS(0.822)KDKDAAS(0.005)PVASSSSAAK
gi|472581189	RHTO_05506	250	S-adenosylmethionine decarboxylase		S	LSTTPSAFPTPRRQHSSTAIVPSSSSDPRVP	X;X;X;X;X;X;X;X;X;X;X;X;X;X;X;Phospho (STY);X;X;X;X;X;X;X;X;X;X;X;X;X;X;X	XXXXXXXXXXXXPPPPPPPPPPPPPPPPPXX	0.00315477	78.088	78.088	_RQHS(ph)STAIVPSSSSDPR_	RQHS(0.333)S(0.333)T(0.333)AIVPSSSSDPR
gi|472581189	RHTO_05506	251	S-adenosylmethionine decarboxylase		S	STTPSAFPTPRRQHSSTAIVPSSSSDPRVPS	X;X;X;X;X;X;X;X;X;X;X;X;X;X;X;X;X;X;X;X;X;X;X;X;X;X;X;X;X;X;X	XXXXXXXXXXXXXXXXXXXXXXXXXXXXXXX	0.00315477	78.088	78.088	_RQHS(ph)STAIVPSSSSDPR_	RQHS(0.333)S(0.333)T(0.333)AIVPSSSSDPR
gi|472581191	RHTO_05508	203	zinc finger, RING-type protein	1;2	S	APRPPRRARRSVVFVSDGDDTDDADYRPRNQ	X;X;X;X;X;X;X;X;X;X;X;X;X;X;X;Phospho (STY);X;X;X;X;Phospho (STY);X;X;X;X;X;X;X;X;X;X	XXXXXXXXXXPPPPPPPPPPPPPPPPPPPXX	6.22e-29	181.87	140.73	_SVVFVS(ph)DGDDTDDADYRPR_	SVVFVS(1)DGDDTDDADYRPR
gi|472581192	RHTO_05509	35	rRNA processing protein Fcf2	1	S	DRSGTESLTSTLVSGSPPNSATLESDTGDHG	X;X;X;X;X;X;X;X;X;X;X;X;X;X;X;Phospho (STY);X;X;X;X;X;X;X;X;X;X;X;X;X;X;X	XXPPPPPPPPPPPPPPPPPPPPPPPPPPPPP	1.26e-15	105.79	95.652	_SGTESLTSTLVSGS(ph)PPNSATLESDTGDHGATDK_	SGTESLT(0.008)S(0.031)T(0.031)LVS(0.038)GS(0.871)PPNS(0.014)AT(0.006)LESDTGDHGATDK
gi|472581192	RHTO_05509	39	rRNA processing protein Fcf2		S	TESLTSTLVSGSPPNSATLESDTGDHGATDK	X;X;X;X;X;X;X;X;X;X;X;X;X;X;X;Phospho (STY);X;X;X;X;X;X;X;X;X;X;X;X;X;X;X	PPPPPPPPPPPPPPPPPPPPPPPPPPPPPPP	0.000821528	63.372	63.372	_SGTESLTSTLVSGSPPNS(ph)ATLESDTGDHGATDK_	SGTESLTSTLVS(0.001)GS(0.034)PPNS(0.344)AT(0.092)LES(0.344)DT(0.092)GDHGAT(0.092)DK
gi|472581192	RHTO_05509	44	rRNA processing protein Fcf2		S	STLVSGSPPNSATLESDTGDHGATDKARKED	X;X;X;X;X;X;X;X;X;X;X;X;X;X;X;X;X;X;X;X;X;X;X;X;X;X;X;X;X;X;X	XXXXXXXXXXXXXXXXXXXXXXXXXXXXXXX	0.000821528	63.372	63.372	_SGTESLTSTLVSGSPPNS(ph)ATLESDTGDHGATDK_	SGTESLTSTLVS(0.001)GS(0.034)PPNS(0.344)AT(0.092)LES(0.344)DT(0.092)GDHGAT(0.092)DK
gi|472581193	RHTO_05510	142	Sas10p	3	S	RFGHEYDPKQDVVFPSSDEDESDEDEGAGEV	X;X;X;X;X;X;X;X;X;X;X;X;X;X;X;Phospho (STY);Phospho (STY);X;X;X;X;Phospho (STY);X;X;X;X;X;X;X;X;X	XPPPPPPPPPPPPPPPPPPPPPPPPPPPPPP	0.000262458	69.052	69.052	_FGHEYDPKQDVVFPS(ph)S(ph)DEDES(ph)DEDEGAGEVDER_	FGHEYDPKQDVVFPS(1)S(1)DEDES(1)DEDEGAGEVDER
gi|472581193	RHTO_05510	143	Sas10p	2;3	S	FGHEYDPKQDVVFPSSDEDESDEDEGAGEVD	X;X;X;X;X;X;X;X;X;X;X;X;X;X;Phospho (STY);Phospho (STY);X;X;X;X;Phospho (STY);X;X;X;X;X;X;X;X;X;X	PPPPPPPPPPPPPPPPPPPPPPPPPPPPPPP	0.000262458	69.052	69.052	_FGHEYDPKQDVVFPS(ph)S(ph)DEDES(ph)DEDEGAGEVDER_	FGHEYDPKQDVVFPS(1)S(1)DEDES(1)DEDEGAGEVDER
gi|472581193	RHTO_05510	148	Sas10p	2;3	S	DPKQDVVFPSSDEDESDEDEGAGEVDERQLA	X;X;X;X;X;X;X;X;X;Phospho (STY);Phospho (STY);X;X;X;X;Phospho (STY);X;X;X;X;X;X;X;X;X;X;X;X;X;X;X	PPPPPPPPPPPPPPPPPPPPPPPPPPPPXXX	0.000262458	69.052	69.052	_FGHEYDPKQDVVFPS(ph)S(ph)DEDES(ph)DEDEGAGEVDER_	FGHEYDPKQDVVFPS(1)S(1)DEDES(1)DEDEGAGEVDER
gi|472581205	RHTO_05522	544	MFS transporter, sugar transporter	1	S	RGWWSGSQGGSSRGGSRPTTPRIRDYQSVRQ	X;X;X;X;X;X;X;X;X;X;X;X;X;X;X;Phospho (STY);X;X;X;X;X;X;X;X;X;X;X;X;X;X;X	XXXXXXXXXXXXXPPPPPPPPPXXXXXXXXX	0.0084573	116.77	116.77	_GGS(ph)RPTTPR_	GGS(1)RPTTPR
gi|472581205	RHTO_05522	513	MFS transporter, sugar transporter	1;2	S	DHVEPPYPRNHKRTLSGASLPGRGSDGVEAV	X;X;X;X;X;X;X;X;X;X;X;X;X;X;X;Phospho (STY);X;X;Phospho (STY);X;X;X;X;X;X;X;X;X;X;X;X	XXXXXXXXXXXXXPPPPPPPPPPPPPPPPPP	0.00145647	128.68	88.282	_TLS(ph)GAS(ph)LPGR_	TLS(1)GAS(1)LPGR
gi|472581205	RHTO_05522	516	MFS transporter, sugar transporter	1;2	S	EPPYPRNHKRTLSGASLPGRGSDGVEAVRGW	X;X;X;X;X;X;X;X;X;X;Phospho (STY);X;Phospho (STY);X;X;Phospho (STY);X;X;X;X;X;X;X;X;X;X;X;X;X;X;X	XXXXXXXXXXPPPPPPPPPPPPPPPPPPPXX	0.00230958	114.24	108.58	_TLS(ph)GAS(ph)LPGR_	TLS(1)GAS(1)LPGR
gi|472581222	RHTO_05338	233	pumilio RNA binding protein (partial sequence c terminus)	1;2	S	MNTDDDKFPILVRRGSGTGLTPARAGATGEW	X;X;X;X;X;X;X;X;X;X;X;X;X;X;X;Phospho (STY);X;Phospho (STY);X;X;X;X;X;X;X;X;X;X;X;X;X	XXXXXXXXXXXXXPPPPPPPPPPPXXXXXXX	0.000333145	135.14	106.3	_RGS(ph)GT(ph)GLTPAR_	RGS(1)GT(0.927)GLT(0.073)PAR
gi|472581222	RHTO_05338	288	pumilio RNA binding protein (partial sequence c terminus)	2	S	VSPGGRSSALPPPNKSERASPTGAVKINGAV	X;X;X;X;X;X;X;X;X;X;X;X;X;X;X;Phospho (STY);X;X;X;Phospho (STY);X;Phospho (STY);X;X;X;X;X;X;X;X;X	XXXXXXPPPPPPPPPPPPPPPPPPPPXXXXX	0.00358438	91.355	91.355	_SSALPPPNKS(ph)ERASPT(ph)GAVK_	SSALPPPNKS(1)ERAS(0.387)PT(0.613)GAVK
gi|472581222	RHTO_05338	292	pumilio RNA binding protein (partial sequence c terminus)	1;2	S	GRSSALPPPNKSERASPTGAVKINGAVGAGV	X;X;X;X;X;X;X;X;X;X;X;Phospho (STY);X;X;X;Phospho (STY);X;Phospho (STY);X;X;X;X;X;X;X;X;X;X;X;X;X	XXPPPPPPPPPPPPPPPPPPPPXXXXXXXXX	0.00233432	103.39	97.69	_SERAS(ph)PTGAVK_	SERAS(1)PTGAVK
gi|472581234	RHTO_05350	26	F-box domain, cyclin-like domain containg protein	1	S	NRHASQARGPDGEPLSPPAIDRLHLASDDDE	X;X;X;X;X;X;X;X;X;X;X;X;X;X;X;Phospho (STY);X;X;X;X;X;X;X;X;X;X;X;X;X;X;X	XXXXXXXXPPPPPPPPPPPPPPXXXXXXXXX	1.95e-06	149.52	149.52	_GPDGEPLS(ph)PPAIDR_	GPDGEPLS(1)PPAIDR
gi|472581247	RHTO_05363	23	late secretory pathway protein AVL9 family protein	2	S	TGPPTASSASEPTSTSSSPTRSSTIPSSLNT	X;X;X;X;X;X;X;X;X;X;X;X;X;X;X;Phospho (STY);Phospho (STY);X;X;X;X;X;X;X;X;X;X;X;X;X;X	PPPPPPPPPPPPPPPPPPPPPXXXXXXXXXX	0.0116186	69.578	69.578	_TGPPTASSASEPTSTS(ph)S(ph)SPTR_	TGPPTASSAS(0.001)EPT(0.209)S(0.202)T(0.202)S(0.504)S(0.517)S(0.253)PT(0.111)R
gi|472581247	RHTO_05363	24	late secretory pathway protein AVL9 family protein	2	S	GPPTASSASEPTSTSSSPTRSSTIPSSLNTA	X;X;X;X;X;X;X;X;X;X;X;X;X;X;Phospho (STY);Phospho (STY);X;X;X;X;X;X;X;X;X;X;X;X;X;X;X	PPPPPPPPPPPPPPPPPPPPXXXXXXXXXXX	0.0116186	69.578	69.578	_TGPPTASSASEPTSTS(ph)S(ph)SPTR_	TGPPTASSAS(0.001)EPT(0.209)S(0.202)T(0.202)S(0.504)S(0.517)S(0.253)PT(0.111)R
gi|472581247	RHTO_05363	25	late secretory pathway protein AVL9 family protein		S	PPTASSASEPTSTSSSPTRSSTIPSSLNTAS	X;X;X;X;X;X;X;X;X;X;X;X;X;X;X;X;X;X;X;X;X;X;X;X;X;X;X;X;X;X;X	XXXXXXXXXXXXXXXXXXXXXXXXXXXXXXX	0.0116186	60.764	60.764	_TGPPTASSASEPTSTS(ph)S(ph)SPTR_	TGPPTASSASEPT(0.016)S(0.284)T(0.284)S(0.375)S(0.375)S(0.333)PT(0.333)R
gi|472581249	RHTO_05365	712	signal transducer		S	RRSSIAPPRAPSSAASLGDTSCLSTASAPAS	X;X;X;X;X;X;X;X;X;X;X;X;X;X;X;Phospho (STY);X;X;X;X;X;X;X;X;X;X;X;X;X;X;X	XXXXXXXXXPPPPPPPPPPPPPPPPPPPPPP	0.00710411	51.125	51.125	_APSSAAS(ph)LGDTSCLSTASAPASSRPATARR_	APS(0.149)S(0.149)AAS(0.439)LGDT(0.135)S(0.122)CLS(0.005)T(0.002)AS(0.001)APASSRPATARR
gi|472581249	RHTO_05365	356	signal transducer	2	S	LTGKSAFTRKLDEVDSDSDDEDDIDFLSPRK	X;X;X;X;X;X;X;X;X;X;X;X;X;X;X;Phospho (STY);X;Phospho (STY);X;X;X;X;X;X;X;X;X;X;X;X;X	XXXXXXXXXPPPPPPPPPPPPPPPPPPPPPX	0.000594208	104.67	104.67	_KLDEVDS(ph)DS(ph)DDEDDIDFLSPR_	KLDEVDS(1)DS(1)DDEDDIDFLSPR
gi|472581249	RHTO_05365	358	signal transducer	2	S	GKSAFTRKLDEVDSDSDDEDDIDFLSPRKKR	X;X;X;X;X;X;X;X;X;X;X;X;X;Phospho (STY);X;Phospho (STY);X;X;X;X;X;X;X;X;X;X;X;X;X;X;X	XXXXXXXPPPPPPPPPPPPPPPPPPPPPXXX	0.000594208	104.67	87.49	_KLDEVDS(ph)DS(ph)DDEDDIDFLSPR_	KLDEVDS(1)DS(1)DDEDDIDFLSPR
gi|472581254	RHTO_05370	345	transcription factor	1	S	ELETLRRVAGVERAASVGLEGKRAREGEELG	X;X;X;X;X;X;X;X;X;X;X;X;X;X;X;Phospho (STY);X;X;X;X;X;X;X;X;X;X;X;X;X;X;X	XXXXXXXXXXXXXPPPPPPPPPPXXXXXXXX	0.00289265	129.34	103.88	_AAS(ph)VGLEGKR_	AAS(1)VGLEGKR
gi|472581267	RHTO_05383	743	conserved hypothetical protein		S	APGAQDHSPPPRSARSGSAGDNSPGANVNKP	X;X;X;X;X;X;X;X;X;X;X;X;X;X;X;Phospho (STY);X;X;X;X;X;X;X;X;X;X;X;X;X;X;X	XXXXXXXXXXXXXXXPPPPPPPPPPPPPPPP	0.00394174	89.831	89.831	_S(ph)GSAGDNSPGANVNKPGR_	S(0.485)GS(0.485)AGDNS(0.03)PGANVNKPGR
gi|472581267	RHTO_05383	745	conserved hypothetical protein	1	S	GAQDHSPPPRSARSGSAGDNSPGANVNKPGR	X;X;X;X;X;X;X;X;X;X;X;X;X;X;X;Phospho (STY);X;X;X;X;X;X;X;X;X;X;X;X;X;X;X	XXXXXXXXXXXXXPPPPPPPPPPPPPPPPPP	2.66e-16	153.83	90.707	_SGS(ph)AGDNSPGANVNKPGR_	S(0.01)GS(0.99)AGDNSPGANVNKPGR
gi|472581267	RHTO_05383	750	conserved hypothetical protein	1	S	SPPPRSARSGSAGDNSPGANVNKPGRALALP	X;X;X;X;X;X;X;X;X;X;X;X;X;X;X;Phospho (STY);X;X;X;X;X;X;X;X;X;X;X;X;X;X;X	XXXXXXXXPPPPPPPPPPPPPPPPPPXXXXX	8.84e-16	147.1	147.1	_SGSAGDNS(ph)PGANVNKPGR_	SGSAGDNS(1)PGANVNKPGR
gi|472581270	RHTO_05386	62	protein phosphatase	1	S	KPVRPPKAAQRPSTASRRSSMAAGGTAEKDT	X;X;X;X;X;X;X;X;X;X;X;X;X;X;X;Phospho (STY);X;X;X;X;X;X;X;X;X;X;X;X;X;X;X	XXXXXXXPPPPPPPPPPXXXXXXXXXXXXXX	1.67e-05	164.11	164.11	_AAQRPSTAS(ph)R_	AAQRPST(0.03)AS(0.97)R
gi|472581282	RHTO_05398	57	K Homology domain containing protein	1	S	QQAQQAQQRAQGHQASQSDGAVAVATPSAAA	X;X;X;X;X;X;X;X;X;X;X;X;X;X;X;Phospho (STY);X;X;X;X;X;X;X;X;X;X;X;X;X;X;X	XXXXXXXXXPPPPPPPPPPPPPPPPPPPPPP	1.79e-38	138.09	138.09	_AQGHQAS(ph)QSDGAVAVATPSAAASSASPTEASSATR_	AQGHQAS(0.844)QS(0.156)DGAVAVATPSAAASSASPTEASSATR
gi|472581282	RHTO_05398	59	K Homology domain containing protein	1	S	AQQAQQRAQGHQASQSDGAVAVATPSAAASS	X;X;X;X;X;X;X;X;X;X;X;X;X;X;X;X;X;X;X;X;X;X;X;X;X;X;X;X;X;X;X	XXXXXXXXXXXXXXXXXXXXXXXXXXXXXXX	4.58e-25	121.7	121.7	_AQGHQAS(ph)QSDGAVAVATPSAAASSASPTEASSATR_	AQGHQAS(0.5)QS(0.5)DGAVAVATPSAAASSASPTEASSATR
gi|472581282	RHTO_05398	73	K Homology domain containing protein		S	QSDGAVAVATPSAAASSASPTEASSATRGHS	X;X;X;X;X;X;X;X;X;X;X;X;X;X;X;Phospho (STY);X;X;X;X;X;X;X;X;X;X;X;X;X;X;X	PPPPPPPPPPPPPPPPPPPPPPPPPPPPXXX	0.0026136	71.988	71.988	_AQGHQASQSDGAVAVATPSAAAS(ph)SASPTEASSATR_	AQGHQASQSDGAVAVAT(0.001)PS(0.006)AAAS(0.326)S(0.326)AS(0.25)PT(0.085)EAS(0.001)S(0.001)AT(0.004)R
gi|472581282	RHTO_05398	74	K Homology domain containing protein		S	SDGAVAVATPSAAASSASPTEASSATRGHST	X;X;X;X;X;X;X;X;X;X;X;X;X;X;X;Phospho (STY);X;X;X;X;X;X;X;X;X;X;X;X;X;X;X	PPPPPPPPPPPPPPPPPPPPPPPPPPPXXXX	2.08e-38	137.5	137.5	_AQGHQASQSDGAVAVATPSAAASS(ph)ASPTEASSATR_	AQGHQASQSDGAVAVATPS(0.001)AAAS(0.096)S(0.418)AS(0.418)PT(0.066)EAS(0.001)S(0.001)ATR
gi|472581282	RHTO_05398	76	K Homology domain containing protein		S	GAVAVATPSAAASSASPTEASSATRGHSTSS	X;X;X;X;X;X;X;X;X;X;X;X;X;X;X;Phospho (STY);X;X;X;X;X;X;X;X;X;X;X;X;X;X;X	PPPPPPPPPPPPPPPPPPPPPPPPPXXXXXX	2.08e-38	137.5	98.033	_AQGHQASQSDGAVAVATPSAAASSAS(ph)PTEASSATR_	AQGHQASQSDGAVAVATPSAAAS(0.146)S(0.146)AS(0.489)PT(0.146)EAS(0.044)S(0.014)AT(0.014)R
gi|472581290	RHTO_05406	37	WW/Rsp5/WWP domain containing protein		S	PSAVDHSSAAPTHRRSSSAGSVASASSNYTS	X;X;X;X;X;X;X;X;X;X;X;X;X;X;X;Phospho (STY);X;X;X;X;X;X;X;X;X;X;X;X;X;X;X	XXXXXXXXXXXXXXXPPPPPPPPPPPPPPPP	5.11e-15	119.34	119.34	_S(ph)SSAGSVASASSNYTSEDDRDDGAIPDEAR_	S(0.332)S(0.332)S(0.332)AGS(0.003)VASASSNYTSEDDRDDGAIPDEAR
gi|472581290	RHTO_05406	38	WW/Rsp5/WWP domain containing protein		S	SAVDHSSAAPTHRRSSSAGSVASASSNYTSE	X;X;X;X;X;X;X;X;X;X;X;X;X;X;X;X;X;X;X;X;X;X;X;X;X;X;X;X;X;X;X	XXXXXXXXXXXXXXXXXXXXXXXXXXXXXXX	5.11e-15	119.34	119.34	_S(ph)SSAGSVASASSNYTSEDDRDDGAIPDEAR_	S(0.332)S(0.332)S(0.332)AGS(0.003)VASASSNYTSEDDRDDGAIPDEAR
gi|472581290	RHTO_05406	39	WW/Rsp5/WWP domain containing protein	1	S	AVDHSSAAPTHRRSSSAGSVASASSNYTSED	X;X;X;X;X;X;X;X;X;X;X;X;X;X;X;Phospho (STY);X;X;X;X;X;X;X;X;X;X;X;X;X;X;X	XXXXXXXXXXXXXPPPPPPPPPPPPPPPPPP	5.11e-15	119.34	106.99	_SSS(ph)AGSVASASSNYTSEDDRDDGAIPDEAR_	S(0.029)S(0.15)S(0.821)AGS(0.001)VASASSNYTSEDDRDDGAIPDEAR
gi|472581290	RHTO_05406	47	WW/Rsp5/WWP domain containing protein		S	PTHRRSSSAGSVASASSNYTSEDDRDDGAIP	X;X;X;X;X;X;X;X;X;X;X;X;X;X;X;Phospho (STY);Phospho (STY);X;X;X;X;X;X;X;X;X;X;X;X;X;X	XXXXPPPPPPPPPPPPPPPPPPPPPPPPPPP	0.00662176	65.775	65.775	_RSSSAGSVASAS(ph)S(ph)NYTSEDDRDDGAIPDEAR_	RS(0.124)S(0.124)S(0.055)AGS(0.111)VAS(0.116)AS(0.357)S(0.188)NY(0.239)T(0.343)S(0.343)EDDRDDGAIPDEAR
gi|472581290	RHTO_05406	48	WW/Rsp5/WWP domain containing protein		S	THRRSSSAGSVASASSNYTSEDDRDDGAIPD	X;X;X;X;X;X;X;X;X;X;X;X;X;X;Phospho (STY);Phospho (STY);X;X;X;X;X;X;X;X;X;X;X;X;X;X;X	XXXPPPPPPPPPPPPPPPPPPPPPPPPPPPP	0.00662176	65.775	65.775	_RSSSAGSVASAS(ph)S(ph)NYTSEDDRDDGAIPDEAR_	RS(0.124)S(0.124)S(0.055)AGS(0.111)VAS(0.116)AS(0.357)S(0.188)NY(0.239)T(0.343)S(0.343)EDDRDDGAIPDEAR
gi|472581290	RHTO_05406	52	WW/Rsp5/WWP domain containing protein	2	S	SSSAGSVASASSNYTSEDDRDDGAIPDEARQ	X;X;X;X;X;X;X;X;X;X;X;X;X;X;Phospho (STY);Phospho (STY);X;X;X;X;X;X;X;X;X;X;X;X;X;X;X	PPPPPPPPPPPPPPPPPPPPPPPPPPPPPPX	0.00662176	65.775	59.555	_RSSSAGSVASASSNYT(ph)S(ph)EDDRDDGAIPDEAR_	RS(0.049)S(0.049)S(0.031)AGS(0.058)VAS(0.048)AS(0.128)S(0.128)NY(0.328)T(0.372)S(0.809)EDDRDDGAIPDEAR
gi|472581294	RHTO_05410	528	nuclear protein SNF4	2	S	AAGQEYDDAISVTDASSVGGGSKTTSRRGSE	X;X;X;X;X;X;X;X;X;X;X;X;X;X;X;Phospho (STY);X;X;X;X;X;Phospho (STY);X;X;X;X;X;X;X;Phospho (STY);X	PPPPPPPPPPPPPPPPPPPPPPPXXXXXXXX	0.00118216	72.499	72.499	_GVHNDANAAGQEYDDAISVTDAS(ph)SVGGGS(ph)K_	GVHNDANAAGQEYDDAIS(0.007)VT(0.041)DAS(0.773)S(0.536)VGGGS(0.642)K
gi|472581294	RHTO_05410	529	nuclear protein SNF4	1;2	S	AGQEYDDAISVTDASSVGGGSKTTSRRGSEA	X;X;X;X;X;X;X;X;X;X;X;X;X;X;X;Phospho (STY);X;X;X;X;X;X;X;X;X;X;X;X;Phospho (STY);X;X	PPPPPPPPPPPPPPPPPPPPPPXXXXXXXXX	0.0103345	58.867	58.867	_GVHNDANAAGQEYDDAISVTDASS(ph)VGGGSK_	GVHNDANAAGQEYDDAIS(0.008)VT(0.018)DAS(0.09)S(0.793)VGGGS(0.09)K
gi|472581294	RHTO_05410	534	nuclear protein SNF4	2	S	DDAISVTDASSVGGGSKTTSRRGSEATTDAG	X;X;X;X;X;X;X;X;X;Phospho (STY);X;X;X;X;X;Phospho (STY);X;X;X;X;X;X;X;Phospho (STY);X;X;Phospho (STY);X;X;X;X	PPPPPPPPPPPPPPPPPXXXXXXXXXXXXXX	0.00118216	72.499	72.499	_GVHNDANAAGQEYDDAISVTDAS(ph)SVGGGS(ph)K_	GVHNDANAAGQEYDDAIS(0.007)VT(0.041)DAS(0.773)S(0.536)VGGGS(0.642)K
gi|472581294	RHTO_05410	542	nuclear protein SNF4	1	S	ASSVGGGSKTTSRRGSEATTDAGGSATDVRL	X;Phospho (STY);Phospho (STY);X;X;X;X;Phospho (STY);X;X;X;X;X;X;X;Phospho (STY);X;X;X;X;X;X;X;X;X;X;X;X;X;X;X	XXXXXXXXXXXXXPPPPPPPPPPPPPPPPPX	3.34e-07	128.04	128.04	_RGS(ph)EATTDAGGSATDVR_	RGS(1)EATTDAGGSATDVR
gi|472581294	RHTO_05410	551	nuclear protein SNF4	1	S	TTSRRGSEATTDAGGSATDVRLAQQAAGLGL	X;X;X;X;X;X;X;X;X;X;X;X;X;X;X;Phospho (STY);X;X;X;X;X;X;X;X;X;X;X;X;X;X;X	XXXXPPPPPPPPPPPPPPPPPXXXXXXXXXX	2.12e-10	151.42	120.33	_RGSEATTDAGGS(ph)ATDVR_	RGSEATTDAGGS(0.989)AT(0.011)DVR
gi|472581294	RHTO_05410	22	nuclear protein SNF4	1	S	ATQTPNTSLPSTTNPSPTTSTATPPPKPRRP	X;X;X;X;X;X;X;X;X;X;X;X;X;X;X;Phospho (STY);X;X;X;X;X;X;X;X;X;X;X;X;X;X;X	PPPPPPPPPPPPPPPPPPPPPPPPPPPPPXX	1.21e-11	99.148	99.148	_SATQTPNTSLPSTTNPS(ph)PTTSTATPPPKPR_	SATQTPNTSLPST(0.001)T(0.001)NPS(0.865)PT(0.058)T(0.058)S(0.008)T(0.006)AT(0.003)PPPKPR
gi|472581311	RHTO_05427	887	Rab GTPase activator	1	S	AEEDTSSRGGGSARGSIGGGFGLGGGRWFSG	X;X;X;X;X;X;X;X;X;X;X;X;X;X;X;Phospho (STY);X;X;X;X;X;X;X;X;X;X;X;X;X;X;X	XXXXXXXXXXXXXXPPPPPPPPPPPPPXXXX	0.000157701	138.73	138.73	_GS(ph)IGGGFGLGGGR_	GS(1)IGGGFGLGGGR
gi|472581311	RHTO_05427	204	Rab GTPase activator	1	S	LRQGANRLSLALSDDSPGERDDADVDTDSPS	X;X;X;X;X;X;X;X;X;X;X;X;X;X;X;Phospho (STY);X;X;X;X;X;X;X;X;X;X;X;X;X;X;X	XXXXXXXPPPPPPPPPPPPPPPPPPPPPPPP	0.000184264	82.635	82.635	_LSLALSDDS(ph)PGERDDADVDTDSPSK_	LSLALS(0.01)DDS(0.99)PGERDDADVDTDSPSK
gi|472581311	RHTO_05427	140	Rab GTPase activator	1	S	VDGGRSGDGDGDGDDSGRSSPDRAPTPTLSS	X;X;X;X;X;X;X;X;X;X;X;X;X;X;X;Phospho (STY);X;X;X;X;X;X;X;X;X;Phospho (STY);X;Phospho (STY);X;X;X	XXXXXPPPPPPPPPPPPPPPPPPPPPPPPPP	0.000193904	66.58	48.166	_SGDGDGDGDDS(ph)GRSSPDRAPTPTLSSTNPSSATGTTAGR_	S(0.018)GDGDGDGDDS(0.59)GRS(0.112)S(0.199)PDRAPT(0.009)PT(0.034)LS(0.01)S(0.01)T(0.01)NPS(0.003)S(0.003)AT(0.003)GT(0.001)T(0.001)AGR
gi|472581311	RHTO_05427	143	Rab GTPase activator		S	GRSGDGDGDGDDSGRSSPDRAPTPTLSSTNP	X;X;X;X;X;X;X;X;X;X;X;X;X;X;X;Phospho (STY);X;X;X;X;X;X;X;X;X;X;X;X;X;X;X	XXPPPPPPPPPPPPPPPPPPPPPPPPPPPPP	0.000193904	66.58	66.58	_SGDGDGDGDDS(ph)GRSSPDRAPT(ph)PTLSSTNPSSATGTTAGR_	S(0.003)GDGDGDGDDS(0.339)GRS(0.341)S(0.341)PDRAPT(0.284)PT(0.284)LS(0.129)S(0.129)T(0.132)NPS(0.012)S(0.003)ATGTTAGR
gi|472581311	RHTO_05427	144	Rab GTPase activator	2	S	RSGDGDGDGDDSGRSSPDRAPTPTLSSTNPS	X;X;X;X;X;X;X;X;X;X;X;X;X;X;X;Phospho (STY);X;X;X;X;X;Phospho (STY);X;X;X;X;X;X;X;X;X	XPPPPPPPPPPPPPPPPPPPPPPPPPPPPPP	0.000193904	67.498	67.498	_SGDGDGDGDDSGRSS(ph)PDRAPT(ph)PTLSSTNPSSATGTTAGR_	S(0.002)GDGDGDGDDS(0.073)GRS(0.232)S(0.681)PDRAPT(0.588)PT(0.148)LS(0.041)S(0.041)T(0.041)NPS(0.059)S(0.059)AT(0.022)GT(0.004)T(0.009)AGR
gi|472581311	RHTO_05427	170	Rab GTPase activator		S	STNPSSATGTTAGRTSSPPSSRPTSVASSSG	X;X;X;X;X;X;X;X;X;X;X;X;X;X;X;Phospho (STY);X;X;X;X;X;X;X;X;X;X;X;X;X;X;X	XXXXXXXXXXXXXXPPPPPPPPPPPPPPPPP	0.000312619	92.426	92.426	_TS(ph)SPPSSRPTSVASSSGIDGLR_	T(0.072)S(0.464)S(0.464)PPS(0.001)SRPTSVASSSGIDGLR
gi|472581311	RHTO_05427	171	Rab GTPase activator	1	S	TNPSSATGTTAGRTSSPPSSRPTSVASSSGI	X;X;X;X;X;X;X;X;X;X;X;X;X;X;X;Phospho (STY);X;X;X;X;X;X;X;X;X;X;X;X;X;X;X	XXXXXXXXXXXXXPPPPPPPPPPPPPPPPPP	2.04e-05	112.47	112.47	_TSS(ph)PPSSRPTSVASSSGIDGLR_	T(0.007)S(0.036)S(0.954)PPS(0.003)S(0.001)RPTSVASSSGIDGLR
gi|472581312	RHTO_05428	69	voltage-gated chloride channel	2	S	STNTPSTPKGRTRRLSSIATVQGTPVIPIER	X;X;X;X;X;X;X;X;X;X;X;X;X;X;X;Phospho (STY);Phospho (STY);X;X;X;X;X;X;X;X;X;X;X;X;X;X	XXXXXXXXXXXXXPPPPPPPPPPPPPPPPPP	3.51e-16	151.44	151.44	_RLS(ph)S(ph)IATVQGTPVIPIER_	RLS(0.979)S(0.979)IAT(0.042)VQGTPVIPIER
gi|472581312	RHTO_05428	70	voltage-gated chloride channel	2	S	TNTPSTPKGRTRRLSSIATVQGTPVIPIERD	X;X;X;X;X;X;X;X;X;X;X;X;X;X;Phospho (STY);Phospho (STY);X;X;X;X;X;X;X;X;X;X;X;X;X;X;X	XXXXXXXXXXXXPPPPPPPPPPPPPPPPPPX	3.51e-16	151.44	151.44	_RLS(ph)S(ph)IATVQGTPVIPIER_	RLS(0.979)S(0.979)IAT(0.042)VQGTPVIPIER
gi|472581317	RHTO_05433	357	asteroid homolog 1	3	S	LEQAKARAIYDAAYKSSRLSSFVLHVLKHGV	X;X;X;X;X;X;X;X;X;Phospho (STY);X;X;X;X;X;Phospho (STY);X;X;X;Phospho (STY);X;X;X;X;X;X;X;X;X;X;X	XXXXXXXPPPPPPPPPPPPPPPPPPPPPXXX	0.000823868	110.77	58.848	_AIY(ph)DAAYKS(ph)SRLS(ph)SFVLHVLK_	AIY(0.889)DAAY(0.514)KS(0.585)S(0.017)RLS(0.768)S(0.226)FVLHVLK
gi|472581317	RHTO_05433	361	asteroid homolog 1	3	S	KARAIYDAAYKSSRLSSFVLHVLKHGVVMLQ	X;X;X;X;X;Phospho (STY);X;X;X;Phospho (STY);X;Phospho (STY);X;X;X;Phospho (STY);X;X;X;X;X;X;X;X;X;X;X;X;X;X;X	XXXPPPPPPPPPPPPPPPPPPPPPXXXXXXX	0.000823868	110.77	110.77	_AIY(ph)DAAYKS(ph)SRLS(ph)SFVLHVLK_	AIY(0.986)DAAY(0.438)KS(0.576)S(0.001)RLS(0.999)SFVLHVLK
gi|472581321	RHTO_05437	550	ABC bile acid transporter	1	S	TADAAPKPTSKATPASGSEADDLDEEELGKE	X;X;X;X;X;X;X;X;X;X;X;X;X;X;X;Phospho (STY);X;X;X;X;X;X;X;X;X;X;X;X;X;X;X	XXXXXXXXXXXPPPPPPPPPPPPPPPPPPPP	8.36e-11	121.84	121.84	_ATPAS(ph)GSEADDLDEEELGKELEK_	AT(0.044)PAS(0.945)GS(0.011)EADDLDEEELGKELEK
gi|472581321	RHTO_05437	552	ABC bile acid transporter	1	S	DAAPKPTSKATPASGSEADDLDEEELGKELE	X;X;X;X;X;X;X;X;X;X;X;X;X;X;X;Phospho (STY);X;X;X;X;X;X;X;X;X;X;X;X;X;X;X	XXXXXXXXXPPPPPPPPPPPPPPPPPPPPPP	4.45e-14	130.27	117.84	_ATPASGS(ph)EADDLDEEELGKELEK_	AT(0.001)PAS(0.005)GS(0.994)EADDLDEEELGKELEK
gi|472581323	RHTO_05439	410	Set and Cytidine deaminase-like domain containing protein	1;2	S	NKNELSHLKRVRPIESSRSSSPVEQDRPSDN	X;X;X;X;X;X;X;X;X;X;X;X;X;X;X;Phospho (STY);Phospho (STY);X;X;X;X;X;X;X;X;X;X;X;X;X;X	XXXXXXXXXXPPPPPPPPPPPPPPPPPPPPP	1.77e-08	108.57	99.283	_VRPIES(ph)SR_	VRPIES(0.669)S(0.331)R
gi|472581323	RHTO_05439	411	Set and Cytidine deaminase-like domain containing protein	1;2	S	KNELSHLKRVRPIESSRSSSPVEQDRPSDNA	X;X;X;X;X;X;X;X;X;X;X;X;X;X;Phospho (STY);Phospho (STY);X;X;X;X;X;X;X;X;X;X;X;Phospho (STY);X;X;X	XXXXXXXXXPPPPPPPPPPPPPPPPPPPPPP	1.77e-08	110.08	110.08	_VRPIESS(ph)R_	VRPIES(0.04)S(0.96)R
gi|472581323	RHTO_05439	413	Set and Cytidine deaminase-like domain containing protein		S	ELSHLKRVRPIESSRSSSPVEQDRPSDNAEE	X;X;X;X;X;X;X;X;X;X;X;X;Phospho (STY);Phospho (STY);X;X;X;X;X;X;X;X;X;X;X;X;X;X;X;X;X	XXXXXXXXXXXXXXXXXXXXXXXXXXXXXXX	0.012916	65.854	65.854	_VRPIESS(ph)RSSSPVEQDRPS(ph)DNAEESDGR_	VRPIES(0.112)S(0.416)RS(0.413)S(0.339)S(0.133)PVEQDRPS(0.567)DNAEES(0.02)DGR
gi|472581323	RHTO_05439	414	Set and Cytidine deaminase-like domain containing protein	2	S	LSHLKRVRPIESSRSSSPVEQDRPSDNAEES	X;X;X;X;X;X;X;X;X;X;X;Phospho (STY);Phospho (STY);X;X;Phospho (STY);Phospho (STY);X;X;X;X;X;X;X;X;X;X;X;X;X;X	XXXXXXPPPPPPPPPPPPPPPPPPPPPPPPP	0.00826628	67.217	67.217	_VRPIESSRSS(ph)S(ph)PVEQDRPSDNAEESDGR_	VRPIES(0.091)S(0.301)RS(0.308)S(0.631)S(0.648)PVEQDRPS(0.02)DNAEES(0.001)DGR
gi|472581323	RHTO_05439	415	Set and Cytidine deaminase-like domain containing protein	2	S	SHLKRVRPIESSRSSSPVEQDRPSDNAEESD	X;X;X;X;X;X;X;X;X;X;Phospho (STY);Phospho (STY);X;X;Phospho (STY);Phospho (STY);X;X;X;X;X;X;X;X;X;X;X;X;X;X;X	XXXXXPPPPPPPPPPPPPPPPPPPPPPPPPP	0.00826628	67.217	67.217	_VRPIESSRSS(ph)S(ph)PVEQDRPSDNAEESDGR_	VRPIES(0.091)S(0.301)RS(0.308)S(0.631)S(0.648)PVEQDRPS(0.02)DNAEES(0.001)DGR
gi|472581323	RHTO_05439	423	Set and Cytidine deaminase-like domain containing protein	2	S	IESSRSSSPVEQDRPSDNAEESDGRSSQLSE	X;X;Phospho (STY);Phospho (STY);X;X;X;X;X;X;X;X;X;X;X;Phospho (STY);X;X;X;X;X;X;X;X;X;X;X;X;X;X;X	PPPPPPPPPPPPPPPPPPPPPPPPPXXXXXX	0.012916	65.854	65.854	_VRPIESS(ph)RSSSPVEQDRPS(ph)DNAEESDGR_	VRPIES(0.112)S(0.416)RS(0.413)S(0.339)S(0.133)PVEQDRPS(0.567)DNAEES(0.02)DGR
gi|472581329	RHTO_05231	31	dimethylaniline monooxygenase (N-oxide forming)	1	S	PRQSPRRTRTHSRRPSSSPGTLRAPLHAAYS	X;X;X;X;X;X;X;X;X;X;X;X;X;X;X;Phospho (STY);X;X;X;X;X;X;X;X;X;X;X;X;X;X;X	XXXXXXXXXXXXXPPPPPPPPPPXXXXXXXX	0.0133234	105.95	105.95	_RPS(ph)SSPGTLR_	RPS(0.864)S(0.027)S(0.106)PGT(0.003)LR
gi|472581334	RHTO_05236	505	transcription initiation factor TFIIF subunit alpha	1	S	STTSAPRGDSNSRAASPNPASPSSAARSRNA	X;X;X;X;X;X;X;X;X;X;X;X;X;X;X;Phospho (STY);X;X;X;X;X;X;X;X;X;X;X;X;X;X;X	XXXXXXXXXXXXXPPPPPPPPPPPPPPXXXX	0.00440031	87.088	78.501	_AAS(ph)PNPASPSSAAR_	AAS(1)PNPASPSSAAR
gi|472581350	RHTO_05252	122	conserved hypothetical protein	1	S	TASVKTSDRSLEKKSSVPSGLGRSTSRQNLT	X;X;X;X;X;X;X;X;X;X;X;X;X;X;X;Phospho (STY);X;X;X;X;X;X;X;X;X;X;X;X;X;X;X	XXXXXXXXXXXXXPPPPPPPPPPXXXXXXXX	0.000901821	129.37	113.69	_SS(ph)VPSGLGR_	SS(1)VPSGLGR
gi|472581350	RHTO_05252	53	conserved hypothetical protein	1	S	GGAGAVPSTTLPRSSSNHGGLGSSVGAGSKP	X;X;X;X;X;X;X;X;X;X;X;X;X;X;X;Phospho (STY);X;X;X;X;X;X;X;X;X;X;X;X;X;X;X	XXXXXXXXXXXXXPPPPPPPPPPPPPPPPPP	0.00683357	53.475	53.475	_SSS(ph)NHGGLGSSVGAGSKPPASASTAGGAPAK_	S(0.131)S(0.131)S(0.738)NHGGLGSSVGAGSKPPASASTAGGAPAK
gi|472581351	RHTO_05253	1000	conserved hypothetical protein		S	SAASHEAERPVVKLPSSSPATARRTAAPVET	X;X;X;X;X;X;X;X;X;X;X;X;X;X;X;Phospho (STY);X;X;X;X;X;X;X;X;X;X;X;X;X;X;X	XXXXXXXXXXXXXPPPPPPPPPPXXXXXXXX	0.00574276	89.266	89.266	_LPS(ph)SSPATAR_	LPS(0.333)S(0.333)S(0.333)PATAR
gi|472581351	RHTO_05253	1001	conserved hypothetical protein		S	AASHEAERPVVKLPSSSPATARRTAAPVETG	X;X;X;X;X;X;X;X;X;X;X;X;X;X;X;X;X;X;X;X;X;X;X;X;X;X;X;X;X;X;X	XXXXXXXXXXXXXXXXXXXXXXXXXXXXXXX	0.00574276	89.266	89.266	_LPS(ph)SSPATAR_	LPS(0.333)S(0.333)S(0.333)PATAR
gi|472581351	RHTO_05253	1002	conserved hypothetical protein	1	S	ASHEAERPVVKLPSSSPATARRTAAPVETGT	X;X;X;X;X;X;X;X;X;X;X;X;X;X;X;Phospho (STY);X;X;X;X;X;X;X;X;X;X;X;X;X;X;X	XXXXXXXXXXXPPPPPPPPPPXXXXXXXXXX	0.00574276	89.266	72.607	_LPSSS(ph)PATAR_	LPS(0.018)S(0.117)S(0.861)PAT(0.004)AR
gi|472581351	RHTO_05253	603	conserved hypothetical protein	1	S	ESFNEPKPSPWARRPSISQGERQVPPHLAAG	X;X;X;X;X;X;X;X;X;X;X;X;X;X;X;Phospho (STY);X;X;X;X;X;X;X;X;X;X;X;X;X;X;X	XXXXXXXXXXXXXPPPPPPPPPXXXXXXXXX	0.0126815	79.089	79.089	_RPS(ph)ISQGER_	RPS(0.997)IS(0.003)QGER
gi|472581351	RHTO_05253	570	conserved hypothetical protein	2	S	MAAAPHHLEPKPRRPSVTSPRMSHAPLHPAP	X;X;X;X;X;X;X;X;X;X;X;X;X;X;X;Phospho (STY);X;X;Phospho (STY);X;X;X;X;X;X;X;X;X;X;X;X	XXXXXXXXXXXXXPPPPPPPPXXXXXXXXXX	0.00321351	136.93	136.93	_RPS(ph)VTS(ph)PR_	RPS(1)VT(0.041)S(0.959)PR
gi|472581351	RHTO_05253	573	conserved hypothetical protein	1;2	S	APHHLEPKPRRPSVTSPRMSHAPLHPAPRRE	X;X;X;X;X;X;X;X;X;X;X;X;Phospho (STY);X;Phospho (STY);Phospho (STY);X;X;X;X;X;X;X;X;X;X;X;X;X;X;X	XXXXXXXXXXPPPPPPPPXXXXXXXXXXXXX	0.00321351	136.93	119.22	_RPSVTS(ph)PR_	RPS(0.004)VT(0.018)S(0.977)PR
gi|472581351	RHTO_05253	1072	conserved hypothetical protein	1	S	EPVLPIHSSRLSRSASPPPAWRQYTVRIAPH	X;X;X;X;X;X;X;X;X;X;X;X;X;X;X;Phospho (STY);X;X;X;X;X;X;X;X;X;X;X;X;X;X;X	XXXXXXXXXXXXXPPPPPPPPPXXXXXXXXX	0.00997176	105.46	105.46	_SAS(ph)PPPAWR_	SAS(1)PPPAWR
gi|472581364	RHTO_05266	285	DnaJ homolog subfamily C member 1	1	S	KKSTGPKKTYRKPTVSADEAGATSGEEATSG	X;X;X;X;X;X;X;X;X;X;X;X;X;X;X;Phospho (STY);X;X;X;X;X;X;X;X;X;X;X;X;X;X;X	XXXXXXXXXXXPPPPPPPPPPPPPPPPPPPP	0.00243253	57.078	51.566	_KPTVS(ph)ADEAGATSGEEATSGGEEGGKK_	KPT(0.067)VS(0.926)ADEAGAT(0.005)S(0.002)GEEATSGGEEGGKK
gi|472581364	RHTO_05266	293	DnaJ homolog subfamily C member 1	1	S	TYRKPTVSADEAGATSGEEATSGGEEGGKKQ	X;X;X;X;X;X;X;X;X;X;X;X;X;X;X;Phospho (STY);X;X;X;X;X;X;X;X;X;X;X;X;X;X;X	XXXPPPPPPPPPPPPPPPPPPPPPPPPPPPX	0.000147888	70.57	70.57	_KPTVSADEAGATS(ph)GEEATSGGEEGGKK_	KPT(0.001)VS(0.001)ADEAGAT(0.346)S(0.65)GEEAT(0.003)SGGEEGGKK
gi|472581364	RHTO_05266	299	DnaJ homolog subfamily C member 1	1	S	VSADEAGATSGEEATSGGEEGGKKQGRGIEG	X;X;X;X;X;X;X;X;X;X;X;X;X;X;X;Phospho (STY);X;X;X;X;X;X;X;X;X;X;X;X;X;X;X	PPPPPPPPPPPPPPPPPPPPPPPPXXXXXXX	0.00016645	73.672	51.234	_KPTVSADEAGATSGEEATS(ph)GGEEGGKK_	KPTVSADEAGAT(0.001)S(0.006)GEEAT(0.144)S(0.848)GGEEGGKK
gi|472581365	RHTO_05267	211	hypothetical protein	1	S	RIRDDAAGVHTPNRDSVDEDALRHRVGGSTS	X;X;X;X;X;X;X;X;X;X;X;X;X;X;X;Phospho (STY);X;X;X;X;X;X;X;X;X;X;X;X;Phospho (STY);Phospho (STY);X	XPPPPPPPPPPPPPPPPPPPPPPXXXXXXXX	0.000129736	106.57	106.57	_IRDDAAGVHTPNRDS(ph)VDEDALR_	IRDDAAGVHTPNRDS(1)VDEDALR
gi|472581365	RHTO_05267	228	hypothetical protein	2;3	S	DEDALRHRVGGSTSPSPPRDHIDEGAAHLAR	X;X;X;X;X;X;X;X;X;X;X;Phospho (STY);Phospho (STY);X;X;Phospho (STY);X;X;X;X;X;X;X;X;X;X;X;X;X;X;X	XXXXXXXXPPPPPPPPPPPPPPPPPPPPPPP	0.00449263	83.312	83.312	_VGGS(ph)T(ph)SPS(ph)PPRDHIDEGAAHLAR_	VGGS(0.973)T(0.551)S(0.476)PS(1)PPRDHIDEGAAHLAR
gi|472581376	RHTO_05278	40	choline kinase	1;2	S	PARDPINGGSSRQRRSSTDSFSLEHNRHNPD	X;X;X;X;X;X;X;X;X;X;X;X;X;X;X;Phospho (STY);X;X;X;Phospho (STY);X;X;X;X;X;X;X;X;X;X;X	XXXXXXXXXXXXXXPPPPPPPPPPPPPXXXX	0.00011556	147.1	108.75	_RS(ph)STDS(ph)FSLEHNR_	RS(0.991)S(0.007)T(0.002)DS(0.96)FS(0.039)LEHNR
gi|472581376	RHTO_05278	41	choline kinase	1;2;3	S	ARDPINGGSSRQRRSSTDSFSLEHNRHNPDI	X;X;X;X;X;X;X;X;X;X;X;X;X;X;X;Phospho (STY);Phospho (STY);X;Phospho (STY);X;Phospho (STY);X;X;X;X;X;X;X;X;X;X	XXXXXXXXXXXXXPPPPPPPPPPPPPXXXXX	7.13e-10	173.21	91.355	_SS(ph)T(ph)DSFSLEHNR_	S(0.032)S(0.943)T(0.853)DS(0.165)FS(0.006)LEHNR
gi|472581376	RHTO_05278	44	choline kinase	1;2;3	S	PINGGSSRQRRSSTDSFSLEHNRHNPDIPDD	X;X;X;X;X;X;X;X;X;X;X;Phospho (STY);Phospho (STY);Phospho (STY);X;Phospho (STY);X;X;X;X;X;X;X;X;X;X;X;X;X;X;X	XXXXXXXXXXPPPPPPPPPPPPPXXXXXXXX	7.13e-10	173.21	173.21	_RSS(ph)TDS(ph)FSLEHNR_	RS(0.177)S(0.815)T(0.009)DS(1)FSLEHNR
gi|472581376	RHTO_05278	46	choline kinase	3	S	NGGSSRQRRSSTDSFSLEHNRHNPDIPDDLE	X;X;X;X;X;X;X;X;X;X;Phospho (STY);Phospho (STY);X;X;X;Phospho (STY);X;X;X;X;X;X;X;X;X;X;X;X;X;X;X	XXXXXXXXPPPPPPPPPPPPPXXXXXXXXXX	0.00462946	93.5	93.5	_RSS(ph)T(ph)DSFS(ph)LEHNR_	RS(0.303)S(0.847)T(0.847)DS(0.296)FS(0.707)LEHNR
gi|472581376	RHTO_05278	404	choline kinase	1	S	EKERERRHRRKMKSRSASAEPQRPGPDPLVH	X;X;X;X;X;X;X;X;X;X;X;X;X;X;X;Phospho (STY);X;X;X;X;X;X;X;X;X;X;X;X;X;X;X	XXXXXXXXXXXXXXXPPPPPPPPPPPPPPPP	0.000926702	72.035	72.035	_S(ph)ASAEPQRPGPDPLVHSSNSSTK_	S(0.5)AS(0.5)AEPQRPGPDPLVHSSNSSTK
gi|472581376	RHTO_05278	406	choline kinase	1	S	ERERRHRRKMKSRSASAEPQRPGPDPLVHSS	X;X;X;X;X;X;X;X;X;X;X;X;X;X;X;X;X;X;X;X;X;X;X;X;X;X;X;X;X;X;X	XXXXXXXXXXXXXXXXXXXXXXXXXXXXXXX	0.000926702	72.035	72.035	_S(ph)ASAEPQRPGPDPLVHSSNSSTK_	S(0.5)AS(0.5)AEPQRPGPDPLVHSSNSSTK
gi|472581376	RHTO_05278	484	choline kinase		S	TIHSGSGRSRYSSTASSLVSSPLLLPHRTPS	X;X;X;X;X;X;X;X;X;X;X;X;X;X;X;Phospho (STY);X;X;X;X;Phospho (STY);X;X;X;X;X;X;X;X;X;X	XXXXXXXXPPPPPPPPPPPPPPPPPPPPXXX	0.00683752	98.3	98.3	_SRYSSTAS(ph)SLVSS(ph)PLLLPHR_	S(0.01)RY(0.29)S(0.07)S(0.059)T(0.07)AS(0.419)S(0.083)LVS(0.158)S(0.842)PLLLPHR
gi|472581376	RHTO_05278	489	choline kinase	1;2	S	SGRSRYSSTASSLVSSPLLLPHRTPSESAAS	X;X;X;X;X;X;X;X;X;X;Phospho (STY);X;X;X;X;Phospho (STY);X;X;X;X;X;X;X;X;X;X;X;X;X;X;X	XXXPPPPPPPPPPPPPPPPPPPPXXXXXXXX	0.00683752	98.3	65.808	_YSSTASSLVSS(ph)PLLLPHR_	YS(0.001)S(0.001)T(0.001)AS(0.001)S(0.001)LVS(0.065)S(0.93)PLLLPHR
gi|472581377	RHTO_05279	217	condensin complex subunit 3	2	S	VALSKLQDADEGAGDSDDDSDDEDEGKEKKS	X;X;X;X;X;X;X;X;X;X;X;X;X;X;X;Phospho (STY);X;X;X;Phospho (STY);X;X;X;X;X;X;X;X;X;X;X	XXXXXPPPPPPPPPPPPPPPPPPPPPPPPPX	0.00183209	69.088	69.088	_LQDADEGAGDS(ph)DDDS(ph)DDEDEGKEKK_	LQDADEGAGDS(1)DDDS(1)DDEDEGKEKK
gi|472581377	RHTO_05279	221	condensin complex subunit 3	2	S	KLQDADEGAGDSDDDSDDEDEGKEKKSVTEV	X;X;X;X;X;X;X;X;X;X;X;Phospho (STY);X;X;X;Phospho (STY);X;X;X;X;X;X;X;X;X;X;X;X;X;X;X	XPPPPPPPPPPPPPPPPPPPPPPPPPXXXXX	0.00183209	69.088	69.088	_LQDADEGAGDS(ph)DDDS(ph)DDEDEGKEKK_	LQDADEGAGDS(1)DDDS(1)DDEDEGKEKK
gi|472581378	RHTO_05280	68	1,3-beta-glucan synthase, glycosyltransferase family 48 protein	1	S	REQYTSEEDARRGDGSQEGYYGGYQQPPGPF	X;X;X;X;X;X;X;X;X;X;X;X;X;X;X;Phospho (STY);X;X;X;X;X;X;X;X;X;X;X;X;X;X;X	XXXXXXXXXXXPPPPPPPPPPPPPPPPPPPP	2.23e-14	129.22	99.836	_RGDGS(ph)QEGYYGGYQQPPGPFQGR_	RGDGS(1)QEGYYGGYQQPPGPFQGR
gi|472581396	RHTO_05298	684	chromatin remodeling complex subunit, Chd3	1	S	RETQPVADVGPDDVESDDEVVERIEGEKRVD	X;X;X;X;X;X;X;X;X;X;X;X;X;X;X;Phospho (STY);X;X;X;X;X;X;X;X;X;X;X;X;X;X;X	XPPPPPPPPPPPPPPPPPPPPPPPPPPPXXX	4.46e-13	124.86	124.86	_ETQPVADVGPDDVES(ph)DDEVVERIEGEK_	ETQPVADVGPDDVES(1)DDEVVERIEGEK
gi|472581396	RHTO_05298	1971	chromatin remodeling complex subunit, Chd3	1	S	PRSAPVAKKAEILVISDSEDDS_________	X;X;X;X;X;X;X;X;X;X;X;X;X;X;X;Phospho (STY);X;X;X;X;X;X;X;X;X;X;X;X;X;X;X	XXXXXXXXPPPPPPPPPPPPPPXXXXXXXXX	2.52e-06	136.63	136.63	_KAEILVIS(ph)DSEDDS_	KAEILVIS(1)DSEDDS
gi|472581396	RHTO_05298	137	chromatin remodeling complex subunit, Chd3	1	S	GSQKSASATTSRSSSSDSDAAVAAVLRRRRG	X;X;X;X;X;X;X;X;X;X;X;X;X;X;X;Phospho (STY);X;X;X;X;X;X;X;X;X;X;X;X;X;X;X	XXXXXXXXXXXXPPPPPPPPPPPPPPPXXXX	2.61e-63	208.2	160.43	_SSSS(ph)DSDAAVAAVLR_	SSS(0.004)S(0.996)DSDAAVAAVLR
gi|472581396	RHTO_05298	6	chromatin remodeling complex subunit, Chd3	1	S	__________MVRSVSPSAPPRSKDRDRSSR	X;X;X;X;X;X;X;X;X;X;X;X;X;X;X;Phospho (STY);X;X;X;X;X;X;X;X;X;X;X;X;X;X;X	XXXXXXXXXXXXXPPPPPPPPPXXXXXXXXX	0.00135217	127.87	88.338	_SVS(ph)PSAPPR_	SVS(1)PSAPPR
gi|472581412	RHTO_05314	456	serine-arginine protein 55, RNA binding protein	1	S	YPPRGDRDAYGAGGRSPARGGNPMERRRSLS	X;X;X;X;X;X;X;X;X;X;X;X;X;X;X;Phospho (STY);X;X;X;X;X;X;X;X;X;X;X;X;X;X;X	XXXXXXXPPPPPPPPPPPPXXXXXXXXXXXX	0.00504429	100.4	100.4	_DAYGAGGRS(ph)PAR_	DAYGAGGRS(1)PAR
gi|472581423	RHTO_05325	185	vacuolar sorting protein VPS32	1	S	ELNKRLAGAEAAPLHSPAAAVPAAKTPAQRI	X;X;X;X;X;X;X;X;X;X;X;X;X;X;X;Phospho (STY);X;X;X;X;X;X;X;X;X;X;X;X;X;X;X	XXXXXPPPPPPPPPPPPPPPPPPPPXXXXXX	7.31e-05	112.34	107.74	_LAGAEAAPLHS(ph)PAAAVPAAK_	LAGAEAAPLHS(1)PAAAVPAAK
gi|472587945	RHTO_03170	236	WD repeat protein	1	S	LWDCTDAGKLVGSVQSSSVRDGAAGIVGADG	X;X;X;X;X;X;X;X;X;X;X;X;X;X;X;Phospho (STY);X;X;X;X;X;X;X;X;X;X;X;X;X;X;X	XXXXXXXXXPPPPPPPPPPPXXXXXXXXXXX	0.001546	101.6	101.6	_LVGSVQS(ph)SSVR_	LVGS(0.006)VQS(0.874)S(0.06)S(0.06)VR
gi|472587945	RHTO_03170	237	WD repeat protein		S	WDCTDAGKLVGSVQSSSVRDGAAGIVGADGE	X;X;X;X;X;X;X;X;X;X;X;X;X;X;X;Phospho (STY);X;X;X;X;X;X;X;X;X;X;X;X;X;X;X	XXXXXXXXPPPPPPPPPPPXXXXXXXXXXXX	0.000794523	139.48	139.48	_LVGSVQSS(ph)SVR_	LVGSVQS(0.026)S(0.487)S(0.487)VR
gi|472587945	RHTO_03170	238	WD repeat protein		S	DCTDAGKLVGSVQSSSVRDGAAGIVGADGED	X;X;X;X;X;X;X;X;X;X;X;X;X;X;X;X;X;X;X;X;X;X;X;X;X;X;X;X;X;X;X	XXXXXXXXXXXXXXXXXXXXXXXXXXXXXXX	0.000794523	139.48	139.48	_LVGSVQSS(ph)SVR_	LVGSVQS(0.026)S(0.487)S(0.487)VR
gi|472581449	RHTO_05130	143	40S ribosomal protein s19	1;2	S	RDLDRIATAVLEEQRSENDDEESA_______	X;X;X;X;X;X;X;X;X;X;X;X;X;X;X;Phospho (STY);X;X;X;X;X;X;Phospho (STY);X;X;X;X;X;X;X;X	XXXXXPPPPPPPPPPPPPPPPPPPXXXXXXX	4.42e-79	161.22	151.95	_IATAVLEEQRS(ph)ENDDEES(ph)A_	IATAVLEEQRS(1)ENDDEES(1)A
gi|472581449	RHTO_05130	150	40S ribosomal protein s19	1;2	S	TAVLEEQRSENDDEESA______________	X;X;X;X;X;X;X;X;Phospho (STY);X;X;X;X;X;X;Phospho (STY);X;X;X;X;X;X;X;X;X;X;X;X;X;X;X	PPPPPPPPPPPPPPPPPXXXXXXXXXXXXXX	0	348.54	151.95	_IATAVLEEQRS(ph)ENDDEES(ph)A_	IATAVLEEQRS(1)ENDDEES(1)A
gi|472581449	RHTO_05130	123	40S ribosomal protein s19	1	S	IGVLEKDTARGGRRISVDGQRDLDRIATAVL	X;X;X;X;X;X;X;X;X;X;X;X;X;X;X;Phospho (STY);X;X;X;X;X;X;X;X;X;X;X;X;X;X;X	XXXXXXXXXXXXXPPPPPPPPXXXXXXXXXX	0.00561003	103.91	92.866	_RIS(ph)VDGQR_	RIS(1)VDGQR
gi|472581452	RHTO_05133	431	protein serine/threonine kinase,ataxia telangectasia mutated family protein	1	S	VEDAQRENRAVEAMLSPTQRGKRRKIEDPLS	X;X;X;X;X;X;X;X;X;X;X;X;X;Oxidation (M);X;Phospho (STY);X;X;X;X;X;X;X;X;X;X;X;X;X;X;X	XXXXXXXXXPPPPPPPPPPPXXXXXXXXXXX	0.000776921	139.66	139.66	_AVEAM(ox)LS(ph)PTQR_	AVEAMLS(1)PTQR
gi|472581475	RHTO_05156	587	double-strand break repair protein MRE11	1	S	AKGKGKGKEKARAQDSDGDEEDEDEEDESSH	X;X;X;X;X;X;X;X;X;X;X;X;X;X;X;Phospho (STY);X;X;X;X;X;X;X;X;X;X;X;X;X;X;X	XXXXXXXXXXXXPPPPPPPPPPPPPPPPPPP	5.82e-05	114.55	114.55	_AQDS(ph)DGDEEDEDEEDESSHR_	AQDS(1)DGDEEDEDEEDESSHR
gi|472581480	RHTO_05161	158	RNA-binding protein 8A	2	S	AAQEKTTSRRSGRERSASPVRKPLVTRID__	X;X;X;X;X;X;X;X;X;X;X;X;X;X;X;Phospho (STY);X;Phospho (STY);X;X;X;X;X;X;X;Phospho (STY);X;X;X;X;X	XXXXXXXXXXXXXPPPPPPPPPPPPPPXXXX	0.00667849	100.97	83.37	_ERS(ph)AS(ph)PVRKPLVTR_	ERS(1)AS(1)PVRKPLVTR
gi|472581480	RHTO_05161	160	RNA-binding protein 8A	1;2	S	QEKTTSRRSGRERSASPVRKPLVTRID____	X;X;X;X;X;X;X;X;X;X;X;X;X;Phospho (STY);X;Phospho (STY);X;X;X;X;X;X;X;X;X;X;X;X;X;X;X	XXXXXXXXXXXPPPPPPPPPPPPPPXXXXXX	0.00667849	100.97	83.37	_ERS(ph)AS(ph)PVRKPLVTR_	ERS(1)AS(1)PVRKPLVTR
gi|472581493	RHTO_05174	1240	Tricalbin	1;2	S	MVFQPGFIYRSRKATSTFSAGRIGTTLGGGA	X;X;X;X;X;X;X;X;X;X;X;X;X;X;Phospho (STY);Phospho (STY);X;X;X;X;X;X;X;X;X;X;X;X;X;X;X	XXXXXXXXXXXXPPPPPPPPPPXXXXXXXXX	2.73e-05	158.42	108.17	_KAT(ph)S(ph)TFSAGR_	KAT(1)S(0.946)T(0.053)FS(0.001)AGR
gi|472581493	RHTO_05174	35	Tricalbin	1	S	ARDEALGANVHSFDPSASPAEKAAQARKAAS	X;X;X;X;X;X;X;X;X;X;X;X;X;X;X;Phospho (STY);X;X;X;X;X;X;X;X;X;X;X;X;X;X;X	XXPPPPPPPPPPPPPPPPPPPPXXXXXXXXX	5.84e-05	114.52	114.52	_DEALGANVHSFDPS(ph)ASPAEK_	DEALGANVHSFDPS(0.5)AS(0.5)PAEK
gi|472581493	RHTO_05174	37	Tricalbin	1	S	DEALGANVHSFDPSASPAEKAAQARKAASAV	X;X;X;X;X;X;X;X;X;X;X;X;X;X;X;Phospho (STY);X;X;X;X;X;X;X;X;X;X;X;X;X;X;X	PPPPPPPPPPPPPPPPPPPPXXXXXXXXXXX	1.75e-24	167.14	167.14	_DEALGANVHSFDPSAS(ph)PAEK_	DEALGANVHSFDPS(0.023)AS(0.977)PAEK
gi|472581493	RHTO_05174	62	Tricalbin	1	S	KAASAVTPVDMSAAPSLRKGELGQFTKDGGS	X;X;X;X;X;X;X;X;X;X;Oxidation (M);X;X;X;X;Phospho (STY);X;X;X;X;X;X;X;X;X;X;X;X;X;X;X	PPPPPPPPPPPPPPPPPPXXXXXXXXXXXXX	0.00490695	71.601	71.601	_KAASAVTPVDM(ox)SAAPS(ph)LR_	KAASAVTPVDMS(0.003)AAPS(0.997)LR
gi|472581501	RHTO_05182	443	RNA polymerase-associated protein LEO1	1	S	GRRSKKATKIEGLDLSDDEDEDEDAYGGYGT	X;X;X;X;X;X;X;X;X;X;X;X;X;X;X;Phospho (STY);X;X;X;X;X;X;X;X;X;X;X;X;X;X;X	XXXXXPPPPPPPPPPPPPPPPPPPPPPPPPP	2.12e-74	204.35	130.89	_IEGLDLS(ph)DDEDEDEDAYGGYGTR_	IEGLDLS(1)DDEDEDEDAYGGYGTR
gi|472581518	RHTO_05199	516	conserved hypothetical protein	1	S	KGKKVEQTPALGAEVSEDEGAQQQKVDKKAR	X;X;X;X;X;X;X;X;X;X;X;X;X;X;X;Phospho (STY);X;X;X;X;X;X;X;X;X;X;X;X;X;X;X	XXXPPPPPPPPPPPPPPPPPPPPPPXXXXXX	6.27e-19	148.24	106.93	_KVEQTPALGAEVS(ph)EDEGAQQQK_	KVEQTPALGAEVS(1)EDEGAQQQK
gi|472581520	RHTO_05201	1301	ubiquitin carboxyl-terminal hydrolase 4/11/15		S	EAAHSPFASRENLNASTSTEDFFGCIVNKYG	X;X;X;X;Phospho (STY);X;X;X;X;X;X;X;X;X;X;Phospho (STY);X;X;X;X;X;X;X;X;X;X;X;X;X;X;X	XXXXXXXXXXPPPPPPPPPPPPPPPPPPPXX	0.000542406	109.42	109.42	_ENLNAS(ph)TSTEDFFGCIVNK_	ENLNAS(0.25)T(0.25)S(0.25)T(0.25)EDFFGCIVNK
gi|472581520	RHTO_05201	1303	ubiquitin carboxyl-terminal hydrolase 4/11/15		S	AHSPFASRENLNASTSTEDFFGCIVNKYGSS	X;X;Phospho (STY);X;X;X;X;X;X;X;X;X;X;X;X;X;X;X;X;X;X;X;X;X;X;X;X;X;X;X;X	XXXXXXXXXXXXXXXXXXXXXXXXXXXXXXX	0.000542406	109.42	109.42	_ENLNAS(ph)TSTEDFFGCIVNK_	ENLNAS(0.25)T(0.25)S(0.25)T(0.25)EDFFGCIVNK
gi|472581520	RHTO_05201	1277	ubiquitin carboxyl-terminal hydrolase 4/11/15	2	S	KSRELVESANASRVASAAPSIAASEAAHSPF	X;X;X;X;X;X;X;X;X;X;X;X;X;X;X;Phospho (STY);X;X;X;X;X;X;X;X;X;X;X;X;Phospho (STY);X;X	XXXXXXXXXXXXXPPPPPPPPPPPPPPPPPP	0.0109366	79.382	79.382	_VAS(ph)AAPSIAASEAAHS(ph)PFASR_	VAS(1)AAPS(0.001)IAAS(0.227)EAAHS(0.764)PFAS(0.008)R
gi|472581520	RHTO_05201	1290	ubiquitin carboxyl-terminal hydrolase 4/11/15	1;2	S	VASAAPSIAASEAAHSPFASRENLNASTSTE	X;X;Phospho (STY);X;X;X;X;X;X;X;X;X;X;X;X;Phospho (STY);X;X;X;X;X;X;X;X;X;X;Phospho (STY);X;X;X;X	PPPPPPPPPPPPPPPPPPPPPXXXXXXXXXX	1.86e-161	242.43	242.43	_VASAAPSIAASEAAHS(ph)PFASR_	VASAAPSIAASEAAHS(1)PFASR
gi|472581536	RHTO_05217	348	GTPase binding protein Rid1	4	S	TSSFIEALPASYGRASPDSTEAQYRRLPLES	X;X;X;X;X;X;X;X;X;X;X;X;X;X;X;Phospho (STY);X;X;X;X;X;X;X;Phospho (STY);X;X;X;X;X;X;Phospho (STY)	XXXXXXXXXXXXXXPPPPPPPPPPPPPPPPP	0.00412007	59.429	59.429	_AS(ph)PDSTEAQY(ph)RRLPLES(ph)QPPT(ph)PQM(ox)PAAAR_	AS(0.517)PDS(0.132)T(0.437)EAQY(0.916)RRLPLES(0.999)QPPT(1)PQMPAAAR
gi|472581536	RHTO_05217	363	GTPase binding protein Rid1	4	S	SPDSTEAQYRRLPLESQPPTPQMPAAARARA	Phospho (STY);X;X;X;X;X;X;X;Phospho (STY);X;X;X;X;X;X;Phospho (STY);X;X;X;Phospho (STY);X;X;Oxidation (M);X;X;X;X;X;X;X;X	PPPPPPPPPPPPPPPPPPPPPPPPPPPPXXX	0.00412007	59.429	59.429	_AS(ph)PDSTEAQY(ph)RRLPLES(ph)QPPT(ph)PQM(ox)PAAAR_	AS(0.517)PDS(0.132)T(0.437)EAQY(0.916)RRLPLES(0.999)QPPT(1)PQMPAAAR
gi|472581536	RHTO_05217	384	GTPase binding protein Rid1	1	S	QMPAAARARARPRSSSLGAGLKQSFEQRQTE	X;Oxidation (M);X;X;X;X;X;X;X;X;X;X;X;X;X;Phospho (STY);X;X;X;X;X;X;X;X;X;X;X;X;X;X;X	XXXXXXXXXXXXXPPPPPPPPPXXXXXXXXX	1.22e-44	186.74	186.74	_SSS(ph)LGAGLK_	SS(0.003)S(0.997)LGAGLK
gi|472581536	RHTO_05217	535	GTPase binding protein Rid1	1	S	PGSSSGRSRSHSRTASATSILLRSLGKSSGT	X;X;X;Phospho (STY);X;X;X;X;X;X;X;X;X;X;X;Phospho (STY);X;X;X;X;X;X;X;X;X;X;X;X;X;X;X	XXXXXXXXXXXXXPPPPPPPPPPXXXXXXXX	0.00364326	108.59	108.59	_TAS(ph)ATSILLR_	TAS(1)ATSILLR
gi|472581542	RHTO_05223	412	DDHD domain containing protein	1	S	RPRADSASTTGTVKRSDSPGPGLFASLRHRI	X;X;X;X;X;Phospho (STY);X;X;X;X;X;X;X;X;X;Phospho (STY);X;X;X;X;X;X;X;X;X;X;X;X;X;X;X	XXXXXXXXXXXXXXPPPPPPPPPPPPPPXXX	0.00252062	103.76	103.76	_RS(ph)DSPGPGLFASLR_	RS(0.5)DS(0.5)PGPGLFASLR
gi|472581542	RHTO_05223	414	DDHD domain containing protein	1	S	RADSASTTGTVKRSDSPGPGLFASLRHRIVG	X;X;X;Phospho (STY);X;X;X;X;X;X;X;X;X;X;X;Phospho (STY);X;X;X;X;X;X;X;X;X;X;X;X;X;X;X	XXXXXXXXXXXXPPPPPPPPPPPPPPXXXXX	1.82e-44	199.15	199.15	_SDS(ph)PGPGLFASLR_	SDS(1)PGPGLFASLR
gi|472581542	RHTO_05223	387	DDHD domain containing protein	1	S	AKTAPADSTAAVTSDSDTEASSARRRPRADS	X;X;X;X;X;X;X;X;X;X;X;X;X;X;X;Phospho (STY);X;X;X;X;X;X;X;X;X;X;X;X;X;X;Phospho (STY)	XXPPPPPPPPPPPPPPPPPPPPPPXXXXXXX	0.00372361	65.954	65.954	_TAPADSTAAVTSDS(ph)DTEASSAR_	TAPADSTAAVT(0.009)S(0.089)DS(0.825)DT(0.076)EAS(0.001)SAR
gi|472581548	RHTO_05229	382	C-5 sterol desaturase	1	S	ETELGLPGSGSSSKASSVKGDDEPGSEPVVE	X;X;X;X;X;X;X;X;X;X;X;X;X;X;X;Phospho (STY);X;X;X;X;X;X;X;X;X;X;X;X;X;X;X	XXXXXXXXXXXXXXPPPPPPPPPPPPPPPPP	1.94e-30	177.02	177.02	_AS(ph)SVKGDDEPGSEPVVEIQEVK_	AS(0.5)S(0.5)VKGDDEPGSEPVVEIQEVK
gi|472581548	RHTO_05229	383	C-5 sterol desaturase	1	S	TELGLPGSGSSSKASSVKGDDEPGSEPVVEI	X;X;X;X;X;X;X;X;X;X;X;X;X;X;X;X;X;X;X;X;X;X;X;X;X;X;X;X;X;X;X	XXXXXXXXXXXXXXXXXXXXXXXXXXXXXXX	1.94e-30	177.02	177.02	_AS(ph)SVKGDDEPGSEPVVEIQEVK_	AS(0.5)S(0.5)VKGDDEPGSEPVVEIQEVK
gi|472581548	RHTO_05229	392	C-5 sterol desaturase		S	SSSKASSVKGDDEPGSEPVVEIQEVKRPRRE	X;X;X;X;X;X;X;X;X;X;X;X;X;X;X;Phospho (STY);X;X;X;X;X;X;X;X;X;X;X;X;X;X;X	XXXXPPPPPPPPPPPPPPPPPPPPPPXXXXX	0.000941731	95.666	95.666	_ASSVKGDDEPGS(ph)EPVVEIQEVK_	AS(0.305)S(0.254)VKGDDEPGS(0.441)EPVVEIQEVK
gi|472581548	RHTO_05229	362	C-5 sterol desaturase	1;2	S	VEAVGLKAPDMKRIDSGLGSETELGLPGSGS	X;X;X;X;X;X;X;X;X;X;X;X;X;X;X;Phospho (STY);X;X;X;Phospho (STY);X;X;X;X;X;X;X;X;X;X;X	XXXXXXXXXXXXPPPPPPPPPPPPPPPPPPP	0.000136373	103.4	103.4	_RIDS(ph)GLGS(ph)ETELGLPGSGSSSK_	RIDS(0.995)GLGS(0.958)ET(0.046)ELGLPGSGSSSK
gi|472581548	RHTO_05229	366	C-5 sterol desaturase	1;2	S	GLKAPDMKRIDSGLGSETELGLPGSGSSSKA	X;X;X;X;X;X;X;X;X;X;X;Phospho (STY);X;X;X;Phospho (STY);X;X;X;X;X;X;X;X;X;X;X;X;X;X;X	XXXXXXXXPPPPPPPPPPPPPPPPPPPPPPX	1.38e-36	181.14	103.4	_RIDS(ph)GLGS(ph)ETELGLPGSGSSSK_	RIDS(0.995)GLGS(0.958)ET(0.046)ELGLPGSGSSSK
gi|472581557	RHTO_04477	158	jumonji domain containing protein	1	S	PDEPTLAEITPMKEDSGEPVAAAKEEVAGTA	X;X;X;X;X;X;X;X;X;X;X;Oxidation (M);X;X;X;Phospho (STY);X;X;X;X;X;X;X;X;X;X;X;X;X;X;X	PPPPPPPPPPPPPPPPPPPPPPPPXXXXXXX	1.11e-12	111.84	111.84	_GGEGPLNPDEPTLAEITPM(ox)KEDS(ph)GEPVAAAK_	GGEGPLNPDEPTLAEIT(0.023)PMKEDS(0.977)GEPVAAAK
gi|472581559	RHTO_04479	764	pheromone-dependent cell cycle arrest protein Far11	1	S	SGGIDSPVTDDVAVASDDEDEDDDPMDPLTV	X;X;X;X;X;X;X;X;X;X;X;X;X;X;X;Phospho (STY);X;X;X;X;X;X;X;X;X;Oxidation (M);X;X;X;X;X	PPPPPPPPPPPPPPPPPPPPPPPPPPPPPPP	0.00209894	62.27	62.27	_TKAHSTLSDGSGGIDSPVTDDVAVAS(ph)DDEDEDDDPM(ox)DPLTVLR_	TKAHSTLSDGSGGIDS(0.003)PVT(0.011)DDVAVAS(0.984)DDEDEDDDPMDPLTVLR
gi|472581562	RHTO_04482	600	Histone deacetylation protein Rxt3	2	S	SEQQQATAPPARRQKSVTPPPLAPPLFTHIE	Phospho (STY);X;X;X;X;X;X;X;X;X;X;X;X;X;X;Phospho (STY);X;Phospho (STY);X;X;X;X;X;X;X;X;X;X;X;X;X	XXXXXXXXXXXXXPPPPPPPPPPPPPPPPPP	0.00899064	98.169	89.507	_QKS(ph)VT(ph)PPPLAPPLFTHIEAR_	QKS(1)VT(1)PPPLAPPLFTHIEAR
gi|472581562	RHTO_04482	582	Histone deacetylation protein Rxt3	1	S	PAAPGINGHATKRRRSDASEQQQATAPPARR	X;X;X;X;X;X;X;X;X;X;X;X;X;X;X;Phospho (STY);X;X;X;X;X;X;X;X;X;X;X;X;X;X;X	XXXXXXXXXXXXXPPPPPPPPPPPPPPPPPX	2.57e-16	171.47	171.47	_RRS(ph)DASEQQQATAPPAR_	RRS(1)DASEQQQATAPPAR
gi|472581562	RHTO_04482	585	Histone deacetylation protein Rxt3	1	S	PGINGHATKRRRSDASEQQQATAPPARRQKS	X;X;X;X;X;X;X;X;X;X;X;X;X;X;X;Phospho (STY);X;X;X;X;X;X;X;X;X;X;X;X;X;X;Phospho (STY)	XXXXXXXXXXPPPPPPPPPPPPPPPPPXXXX	5.18e-07	132.01	132.01	_RRSDAS(ph)EQQQATAPPAR_	RRS(0.406)DAS(0.594)EQQQATAPPAR
gi|472581565	RHTO_04485	179	serine/threonine protein kinase Haspin	1	S	AIAVEPKTIEDPAAGSAEESENVVGPVKRVG	X;X;X;X;X;X;X;X;X;X;X;X;X;X;X;Phospho (STY);X;X;X;X;X;X;X;X;X;X;X;X;X;X;X	XXXXXXXPPPPPPPPPPPPPPPPPPPPPPXX	0.000270436	86.453	80.859	_TIEDPAAGS(ph)AEESENVVGPVKR_	TIEDPAAGS(0.997)AEES(0.002)ENVVGPVKR
gi|472581574	RHTO_04494	188	carbon catabolite-derepressing protein kinase		S	FGLSNIMRDGDFLKTSCGSPNYAAPEVISGK	X;X;X;X;X;X;X;X;X;X;X;X;X;X;X;X;X;X;X;X;X;X;X;X;X;X;X;X;X;X;X	XXXXXXXXXXXXXXXXXXXXXXXXXXXXXXX	9.32e-15	139.44	139.44	_DGDFLKT(ph)SCGSPNYAAPEVISGK_	DGDFLKT(0.498)S(0.498)CGS(0.004)PNYAAPEVISGK
gi|472581577	RHTO_04497	308	rRNA-processing protein EFG1	1	S	KRAKEAGAAEPAQTASPVRPAEKTSSKSGRT	X;X;X;X;X;X;X;X;X;X;X;X;X;X;X;Phospho (STY);X;X;X;X;X;X;X;X;X;X;X;X;X;X;X	XXPPPPPPPPPPPPPPPPPPPPPXXXXXXXX	2.17e-16	152	133.25	_EAGAAEPAQTAS(ph)PVRPAEK_	EAGAAEPAQT(0.008)AS(0.992)PVRPAEK
gi|472581579	RHTO_04499	607	two-component GAP Byr4		S	SRGRPRARTSSLRTVSSTSDLRTGASTSRAR	X;X;X;X;X;X;X;X;X;X;X;X;X;X;X;Phospho (STY);X;X;X;X;X;X;X;X;X;X;X;X;X;X;X	XXXXXXXXXXXXXPPPPPPPPPXXXXXXXXX	0.00435881	125.74	125.74	_TVS(ph)STSDLR_	TVS(0.5)S(0.5)TSDLR
gi|472581579	RHTO_04499	608	two-component GAP Byr4		S	RGRPRARTSSLRTVSSTSDLRTGASTSRARP	X;X;X;X;X;X;X;X;X;X;X;X;X;X;X;X;X;X;X;X;X;X;X;X;X;X;X;X;X;X;X	XXXXXXXXXXXXXXXXXXXXXXXXXXXXXXX	0.00435881	125.74	125.74	_TVS(ph)STSDLR_	TVS(0.5)S(0.5)TSDLR
gi|472581586	RHTO_04506	259	hypothetical protein	1	S	HETARLPSDIMRRSPSLARLKLTDLPNVVML	X;X;X;X;X;X;X;X;X;X;X;X;X;X;X;Phospho (STY);X;X;X;X;X;X;X;X;X;X;X;X;X;X;X	XXXXXXXXXXXXPPPPPPPXXXXXXXXXXXX	0.00640739	96.342	96.342	_RSPS(ph)LAR_	RSPS(1)LAR
gi|472581602	RHTO_04522	651	specific transcriptional repressor	1	S	PSPQRMQQTLRRSAASPPSASRHPLSRSHGA	X;X;X;X;X;X;X;X;X;X;X;X;X;X;X;Phospho (STY);X;X;X;X;X;X;X;X;X;X;X;X;X;X;X	XXXXXXXXXXXPPPPPPPPPPPXXXXXXXXX	0.00156901	95.57	82.925	_RSAAS(ph)PPSASR_	RSAAS(0.998)PPS(0.002)AS(0.001)R
gi|472581603	RHTO_04523	1217	serine/threonine protein kinase	1	S	PDGKPVVRASTVGEISPSRHQRGASIAAAAS	X;X;X;X;X;X;X;X;X;X;X;X;X;X;X;Phospho (STY);X;X;X;X;X;X;X;X;X;X;X;X;X;X;X	XXXXXXXXPPPPPPPPPPPXXXXXXXXXXXX	1.15e-08	143.38	139.66	_ASTVGEIS(ph)PSR_	ASTVGEIS(1)PSR
gi|472581603	RHTO_04523	1430	serine/threonine protein kinase		S	ASKLLLSHKDGEKQPSSPGGAGEDSQTSLPM	X;X;X;X;X;X;X;X;X;X;X;X;X;X;X;Phospho (STY);X;X;X;X;X;X;X;X;X;X;X;X;X;X;Oxidation (M)	XXXXXXXXXPPPPPPPPPPPPPPPPPPPPPP	0.00129735	74.748	74.748	_DGEKQPS(ph)SPGGAGEDSQTSLPM(ox)SSLDPR_	DGEKQPS(0.499)S(0.499)PGGAGEDS(0.001)QTSLPMSSLDPR
gi|472581603	RHTO_04523	1431	serine/threonine protein kinase	1	S	SKLLLSHKDGEKQPSSPGGAGEDSQTSLPMS	X;X;X;X;X;X;X;X;X;X;X;X;X;X;X;Phospho (STY);X;X;X;X;X;X;X;X;X;X;X;X;X;Oxidation (M);X	XXXXXXXXPPPPPPPPPPPPPPPPPPPPPPP	5.5e-33	158.65	158.65	_DGEKQPSS(ph)PGGAGEDSQTSLPM(ox)SSLDPR_	DGEKQPS(0.035)S(0.965)PGGAGEDSQTSLPMSSLDPR
gi|472581603	RHTO_04523	545	serine/threonine protein kinase	1	S	DPHATAAAKKSEPTGSFLQKAAAKDASKEVR	X;X;X;X;X;X;X;X;X;X;X;X;X;X;X;Phospho (STY);X;X;X;X;X;X;X;X;X;X;X;X;X;X;X	XXXXXXXXXPPPPPPPPPPPXXXXXXXXXXX	0.000695731	107.69	107.69	_KSEPTGS(ph)FLQK_	KSEPT(0.062)GS(0.938)FLQK
gi|472581605	RHTO_04525	210	chaperone regulator	1	S	ISLGSEMKSAMQLDESDDEDESSPSSSTAVS	X;X;X;X;X;X;X;X;X;X;Oxidation (M);X;X;X;X;Phospho (STY);X;X;X;X;X;X;X;X;X;X;X;X;X;X;X	XXXXXXXXPPPPPPPPPPPPPPPPPPPPPPP	2.78e-05	68.834	68.834	_SAM(ox)QLDES(ph)DDEDESSPSSSTAVSSTSTSSTAATKR_	S(0.002)AMQLDES(0.969)DDEDES(0.015)S(0.005)PS(0.006)S(0.002)S(0.001)T(0.001)AVSSTSTSSTAATKR
gi|472581610	RHTO_04530	461	cohesin complex subunit SCC1	2	S	KDRDVEQGRRAMSVVSNLSHLRAAAGLDGFD	X;X;X;X;X;X;X;X;X;X;X;Oxidation (M);X;X;X;Phospho (STY);X;X;Phospho (STY);X;X;X;X;X;X;X;X;X;X;X;X	XXXXXXXXXXPPPPPPPPPPPPXXXXXXXXX	5.77e-10	178.14	173.37	_AM(ox)SVVS(ph)NLS(ph)HLR_	AMSVVS(1)NLS(1)HLR
gi|472581610	RHTO_04530	464	cohesin complex subunit SCC1	2	S	DVEQGRRAMSVVSNLSHLRAAAGLDGFDADL	X;X;X;X;X;X;X;X;Oxidation (M);X;X;X;Phospho (STY);X;X;Phospho (STY);X;X;X;X;X;X;X;X;X;X;X;X;X;X;X	XXXXXXXPPPPPPPPPPPPXXXXXXXXXXXX	5.77e-10	178.14	173.37	_AM(ox)SVVS(ph)NLS(ph)HLR_	AMSVVS(1)NLS(1)HLR
gi|472581610	RHTO_04530	318	cohesin complex subunit SCC1	1;2	S	GGGFDEQREKTPTAPSIAGEDSLQLTPRAAA	X;X;X;X;X;X;X;X;X;X;X;X;X;X;X;Phospho (STY);X;X;X;X;X;X;X;X;X;Phospho (STY);X;X;X;X;X	XXXXXXXXPPPPPPPPPPPPPPPPPPPPXXX	0.00750446	95.366	95.366	_EKTPTAPS(ph)IAGEDSLQLT(ph)PR_	EKT(0.018)PT(0.005)APS(0.977)IAGEDSLQLT(1)PR
gi|472581619	RHTO_04539	228	hypothetical protein	2	S	ENVMDVRAIKMARSKSTASTPTGEAFSGGAS	X;X;X;X;X;X;X;X;X;X;X;X;X;X;X;Phospho (STY);X;X;Phospho (STY);Phospho (STY);X;Phospho (STY);X;X;X;X;X;X;X;X;X	XXXXXXXXXXXXXPPPPPPPPPPPPPPPPPP	0.000980168	76.002	63.316	_SKS(ph)TASTPT(ph)GEAFSGGASM(ox)AHTSGK_	S(0.16)KS(0.7)T(0.1)AS(0.063)T(0.06)PT(0.916)GEAFS(0.001)GGASMAHTSGK
gi|472581619	RHTO_04539	231	hypothetical protein		S	MDVRAIKMARSKSTASTPTGEAFSGGASMAH	X;X;X;X;X;X;X;X;X;X;X;X;Phospho (STY);X;X;Phospho (STY);X;X;X;X;X;X;X;X;X;X;X;X;Oxidation (M);X;X	XXXXXXXXXXPPPPPPPPPPPPPPPPPPPPP	0.000980168	76.002	76.002	_SKS(ph)TAS(ph)TPTGEAFSGGASM(ox)AHTSGK_	S(0.391)KS(0.504)T(0.118)AS(0.351)T(0.312)PT(0.323)GEAFSGGASMAHTSGK
gi|472581619	RHTO_04539	193	hypothetical protein	1	S	HPYVRPTGADMMRSVSSPVETQRQLEERQRR	X;X;X;X;X;X;X;X;X;X;X;X;X;X;X;Phospho (STY);X;X;X;X;X;X;X;X;X;X;X;X;X;X;X	XXXXXXXXXXXXXPPPPPPPPPPXXXXXXXX	8.25e-13	183.89	179.93	_SVS(ph)SPVETQR_	SVS(0.999)S(0.001)PVETQR
gi|472581628	RHTO_04548	277	conserved hypothetical protein	1	S	RSTSPSRAAQVPLPASPVPRAKSPARVTSTL	X;X;X;X;X;X;X;X;X;X;X;X;X;X;X;Phospho (STY);X;X;X;X;X;X;X;X;X;X;X;X;X;X;X	XXXXXXXPPPPPPPPPPPPPXXXXXXXXXXX	0.00118357	107.75	87.667	_AAQVPLPAS(ph)PVPR_	AAQVPLPAS(1)PVPR
gi|472581628	RHTO_04548	566	conserved hypothetical protein	1	S	ASSTTGGTKKVKKAASDIGVTSSGWKSTAPP	X;X;X;X;X;X;X;X;X;X;X;X;X;X;X;Phospho (STY);X;X;X;X;X;X;X;X;X;X;X;X;X;X;X	XXXXXXXXXXXXPPPPPPPPPPPPPPXXXXX	2.74e-05	141.86	133.86	_AAS(ph)DIGVTSSGWK_	AAS(1)DIGVTSSGWK
gi|472581628	RHTO_04548	499	conserved hypothetical protein	2	S	LTKHVNDPKARIKALSDVGRPSSPAMPVSSA	X;X;X;X;X;X;X;X;X;X;X;X;X;X;X;Phospho (STY);X;X;X;X;X;Phospho (STY);Phospho (STY);X;X;Oxidation (M);X;X;X;X;X	XXXXXXXXXXXXXPPPPPPPPPPPPPPPPPP	1.23e-05	97.839	97.839	_ALS(ph)DVGRPS(ph)SPAM(ox)PVSSASAGRPK_	ALS(1)DVGRPS(0.806)S(0.194)PAMPVSSASAGRPK
gi|472581628	RHTO_04548	505	conserved hypothetical protein	1;2	S	DPKARIKALSDVGRPSSPAMPVSSASAGRPK	X;X;X;X;X;X;X;X;X;Phospho (STY);X;X;X;X;X;Phospho (STY);X;X;X;Oxidation (M);X;X;X;X;X;X;X;X;X;X;X	XXXXXXXPPPPPPPPPPPPPPPPPPPPPPPP	1.23e-05	97.839	97.839	_ALS(ph)DVGRPS(ph)SPAM(ox)PVSSASAGRPK_	ALS(1)DVGRPS(0.806)S(0.194)PAMPVSSASAGRPK
gi|472581628	RHTO_04548	506	conserved hypothetical protein	2	S	PKARIKALSDVGRPSSPAMPVSSASAGRPKL	X;X;X;X;X;X;X;X;Phospho (STY);X;X;X;X;X;X;Phospho (STY);X;X;Oxidation (M);X;X;X;X;X;X;X;X;X;X;X;X	XXXXXXPPPPPPPPPPPPPPPPPPPPPPPPX	0.00149729	68.168	67.463	_ALS(ph)DVGRPSS(ph)PAM(ox)PVSSASAGRPK_	ALS(0.999)DVGRPS(0.184)S(0.816)PAMPVSSASAGRPK
gi|472581628	RHTO_04548	938	conserved hypothetical protein	1	S	SEDASAPKPTSTLSPSSSIRSATSAPRPGIL	X;X;X;X;X;X;X;X;X;X;X;X;X;X;X;Phospho (STY);X;X;X;X;X;X;X;X;X;X;X;X;X;X;X	PPPPPPPPPPPPPPPPPPPPXXXXXXXXXXX	0.00850524	70.114	70.114	_LAETSEDASAPKPTSTLSPS(ph)SSIR_	LAETSEDASAPKPTSTLS(0.011)PS(0.691)S(0.149)S(0.149)IR
gi|472581628	RHTO_04548	635	conserved hypothetical protein	1	S	PRQSGGTPAAPAETGSLKRKKTKKVPAAAAP	X;X;X;X;X;X;X;X;X;X;X;X;X;X;X;Phospho (STY);X;X;X;X;X;X;X;X;X;X;X;X;X;X;X	XXPPPPPPPPPPPPPPPPPXXXXXXXXXXXX	1.53e-22	183.25	95.227	_QSGGTPAAPAETGS(ph)LKR_	QSGGTPAAPAET(0.004)GS(0.996)LKR
gi|472581641	RHTO_04562	79	transcription initiation factor TFIID subunit 11	1	S	ADSPAAFGGGGKRERSASVADGIGKGKERAG	X;X;X;X;X;X;X;X;X;X;X;X;X;X;X;Phospho (STY);X;X;X;X;X;X;X;X;X;X;X;X;X;X;X	XXXXXXXXXXXXXPPPPPPPPPPPPXXXXXX	0.000348578	144.97	135.23	_ERS(ph)ASVADGIGK_	ERS(0.999)AS(0.001)VADGIGK
gi|472581641	RHTO_04562	6	transcription initiation factor TFIID subunit 11	2	S	__________MKRTASNAGSPPPPSAPPKPK	X;X;X;X;X;X;X;X;X;X;X;X;X;Phospho (STY);X;Phospho (STY);X;X;X;X;X;X;X;X;X;X;X;X;X;X;X	XXXXXXXXXXXXPPPPPPPPPPPPPPPPPPP	0.00150239	103.41	57.826	_RT(ph)AS(ph)NAGSPPPPSAPPKPK_	RT(0.844)AS(0.844)NAGS(0.299)PPPPS(0.013)APPKPK
gi|472581641	RHTO_04562	10	transcription initiation factor TFIID subunit 11	1	S	______MKRTASNAGSPPPPSAPPKPKKPRA	X;X;X;X;X;X;X;X;X;X;X;X;X;X;X;Phospho (STY);X;X;X;X;X;X;X;X;X;X;X;X;X;X;X	XXXXXXXXXPPPPPPPPPPPPPPPPPPXXXX	2.34e-11	136.63	136.63	_TASNAGS(ph)PPPPSAPPKPK_	T(0.005)AS(0.004)NAGS(0.991)PPPPSAPPKPK
gi|472581642	RHTO_04563	103	mitochondrial outer membrane translocase receptor TOM70	1;2	S	AKSADDDDDSLKLTASDIEVMDPETRSKTAL	X;X;X;X;X;X;X;X;X;Phospho (STY);X;X;X;X;X;Phospho (STY);X;X;X;X;Oxidation (M);X;X;X;X;X;X;X;X;X;X	XXPPPPPPPPPPPPPPPPPPPPPPPPXXXXX	4.55e-45	180.09	155.16	_SADDDDDSLKLTAS(ph)DIEVM(ox)DPETR_	SADDDDDSLKLTAS(1)DIEVMDPETR
gi|472581642	RHTO_04563	97	mitochondrial outer membrane translocase receptor TOM70	2	S	GEGKPDAKSADDDDDSLKLTASDIEVMDPET	X;X;X;X;X;X;X;X;X;X;X;X;X;X;X;Phospho (STY);X;X;X;X;X;Phospho (STY);X;X;X;X;Oxidation (M);X;X;X;X	XXXXXXXXPPPPPPPPPPPPPPPPPPPPPPP	0.000900604	84.181	84.181	_SADDDDDS(ph)LKLTAS(ph)DIEVM(ox)DPETR_	S(0.004)ADDDDDS(0.992)LKLT(0.114)AS(0.89)DIEVMDPETR
gi|472581643	RHTO_04564	454	zinc finger, PHD-type protein	1;2;3	S	SGPASDAVKGEEDEGSNLGSPALSSSKKLAD	X;X;X;X;X;X;X;X;X;X;X;X;X;X;X;Phospho (STY);X;X;X;Phospho (STY);X;X;X;Phospho (STY);X;X;X;X;X;X;X	PPPPPPPPPPPPPPPPPPPPPPPPPPPPXXX	0.0058403	65.508	62.781	_M(ox)GLSGPASDAVKGEEDEGS(ph)NLGS(ph)PALS(ph)SSKK_	MGLSGPASDAVKGEEDEGS(0.997)NLGS(0.883)PALS(0.373)S(0.373)S(0.373)KK
gi|472581643	RHTO_04564	458	zinc finger, PHD-type protein	1;2;3	S	SDAVKGEEDEGSNLGSPALSSSKKLADEPAV	X;X;X;X;X;X;X;X;X;X;X;Phospho (STY);X;X;X;Phospho (STY);X;X;X;Phospho (STY);X;X;X;X;X;X;X;X;X;X;X	PPPPPPPPPPPPPPPPPPPPPPPPXXXXXXX	7.84e-11	97.395	65.508	_M(ox)GLSGPASDAVKGEEDEGS(ph)NLGS(ph)PALS(ph)SSKK_	MGLS(0.004)GPAS(0.006)DAVKGEEDEGS(0.995)NLGS(0.995)PALS(0.461)S(0.416)S(0.124)KK
gi|472581643	RHTO_04564	615	zinc finger, PHD-type protein	1	S	RSYADDGLSEFVPAESGTPKAESREDRLRKR	X;X;X;X;X;X;X;X;X;X;X;X;X;X;X;Phospho (STY);X;X;X;X;X;X;X;X;X;X;X;X;X;X;X	XPPPPPPPPPPPPPPPPPPPPPPPXXXXXXX	5.35e-07	114.9	114.9	_SYADDGLSEFVPAES(ph)GTPKAESR_	SYADDGLSEFVPAES(0.567)GT(0.433)PKAESR
gi|472581643	RHTO_04564	622	zinc finger, PHD-type protein		S	LSEFVPAESGTPKAESREDRLRKREEERKRL	X;X;X;X;X;X;X;X;X;X;Phospho (STY);X;X;X;X;X;X;X;X;X;X;X;X;X;X;X;X;X;X;X;X	XXXXXXXXXXXXXXXXXXXXXXXXXXXXXXX	0.00108069	99.409	99.409	_SYADDGLSEFVPAESGT(ph)PKAESR_	SYADDGLSEFVPAES(0.032)GT(0.484)PKAES(0.484)R
gi|472581652	RHTO_04376	313	GPCR, family 3, metabotropic glutamate receptor 5	1	S	SPAAEAKPPTSTPRKSPQLRRRPSNAARPSY	X;X;X;X;X;X;X;X;X;X;X;X;X;X;X;Phospho (STY);X;X;X;X;X;X;X;X;X;X;X;X;X;X;X	XXXXXXXXXXXXXXPPPPPPXXXXXXXXXXX	0.0136423	100.02	84.615	_KS(ph)PQLR_	KS(1)PQLR
gi|472581652	RHTO_04376	947	GPCR, family 3, metabotropic glutamate receptor 5	1;2	S	LEVQLIALRRRNRPPSVPTSPVGGQAPALPG	X;X;X;X;X;X;X;X;X;X;X;X;X;X;X;Phospho (STY);X;X;Phospho (STY);Phospho (STY);X;X;X;X;X;X;X;X;X;X;X	XXXXXXXXXXXPPPPPPPPPPPPPPPPPPPP	1.89e-08	133.41	93.505	_NRPPS(ph)VPTS(ph)PVGGQAPALPGK_	NRPPS(0.999)VPT(0.211)S(0.789)PVGGQAPALPGK
gi|472581652	RHTO_04376	951	GPCR, family 3, metabotropic glutamate receptor 5	1;2	S	LIALRRRNRPPSVPTSPVGGQAPALPGKLGV	X;X;X;X;X;X;X;X;X;X;X;Phospho (STY);X;X;Phospho (STY);Phospho (STY);X;X;X;X;X;X;X;X;X;X;X;X;X;X;X	XXXXXXXPPPPPPPPPPPPPPPPPPPPPXXX	0.000744609	93.505	86.488	_NRPPSVPT(ph)S(ph)PVGGQAPALPGK_	NRPPS(0.143)VPT(0.876)S(0.981)PVGGQAPALPGK
gi|472581652	RHTO_04376	230	GPCR, family 3, metabotropic glutamate receptor 5	1	S	ASSTGPSTAPVAAAPSPRIGTPGRVALPPRQ	X;X;X;X;X;X;X;X;X;X;X;X;X;X;X;Phospho (STY);X;X;X;X;X;X;X;X;X;X;X;X;X;X;X	PPPPPPPPPPPPPPPPPPXXXXXXXXXXXXX	0.000503559	83.063	83.063	_RASNSSASSTGPSTAPVAAAPS(ph)PR_	RASNSSASSTGPSTAPVAAAPS(1)PR
gi|472581657	RHTO_04381	927	cell division control protein Cdc25	1	S	DFFFSGQAVPSHPGDSPRASLAPSSSDKGTI	X;X;X;X;X;X;X;X;X;X;X;X;X;X;X;Phospho (STY);X;X;X;X;X;X;X;X;X;X;X;X;X;X;X	PPPPPPPPPPPPPPPPPPXXXXXXXXXXXXX	2.24e-17	143.99	143.99	_DSVDSDFFFSGQAVPSHPGDS(ph)PR_	DSVDSDFFFSGQAVPS(0.05)HPGDS(0.95)PR
gi|472581657	RHTO_04381	339	cell division control protein Cdc25	2	S	LAAAEHAGADTSKRVSAASDDSALDATFANS	X;X;X;X;X;X;X;X;X;X;X;X;X;X;X;Phospho (STY);X;X;Phospho (STY);X;X;X;X;X;X;X;X;X;X;X;X	XXXXXXXXXXXXXPPPPPPPPPPPPPPPPPP	0.000104776	111.01	111.01	_RVS(ph)AAS(ph)DDSALDATFANSAR_	RVS(0.658)AAS(0.918)DDS(0.425)ALDATFANSAR
gi|472581657	RHTO_04381	342	cell division control protein Cdc25	2	S	AEHAGADTSKRVSAASDDSALDATFANSARR	X;X;X;X;X;X;X;X;X;X;X;X;Phospho (STY);X;X;Phospho (STY);X;X;Phospho (STY);X;X;X;X;X;X;X;X;X;X;X;X	XXXXXXXXXXPPPPPPPPPPPPPPPPPPPPX	0.000104776	111.01	111.01	_RVS(ph)AAS(ph)DDSALDATFANSAR_	RVS(0.658)AAS(0.918)DDS(0.425)ALDATFANSAR
gi|472581657	RHTO_04381	345	cell division control protein Cdc25	2	S	AGADTSKRVSAASDDSALDATFANSARRERR	X;X;X;X;X;X;X;X;X;X;X;X;Phospho (STY);X;X;Phospho (STY);X;X;X;X;X;X;X;X;X;X;X;X;X;X;X	XXXXXXXPPPPPPPPPPPPPPPPPPPPXXXX	0.00533163	92.412	92.412	_RVSAAS(ph)DDS(ph)ALDATFANSAR_	RVS(0.453)AAS(0.547)DDS(1)ALDATFANSAR
gi|472581658	RHTO_04382	409	RAM signalling pathway, SOG2	1	S	GTPLAAGAPSHQRIRSAGSTAADSESTPAAA	X;X;X;X;X;X;X;X;X;X;X;X;X;X;X;Phospho (STY);X;X;X;X;X;X;X;X;X;X;X;X;X;X;X	XXXXXXXXXXXXXPPPPPPPPPPPPPPPPPP	1.83e-35	179.87	140.26	_IRS(ph)AGSTAADSESTPAAAEDR_	IRS(1)AGSTAADSESTPAAAEDR
gi|472581658	RHTO_04382	412	RAM signalling pathway, SOG2		S	LAAGAPSHQRIRSAGSTAADSESTPAAAEDR	X;X;X;X;X;X;X;X;X;X;X;X;X;X;X;X;X;X;X;X;X;X;X;X;X;X;X;X;X;X;X	XXXXXXXXXXXXXXXXXXXXXXXXXXXXXXX	1.29e-07	130.02	66.606	_IRS(ph)AGSTAADSESTPAAAEDR_	IRS(0.333)AGS(0.333)T(0.333)AADSESTPAAAEDR
gi|472581658	RHTO_04382	386	RAM signalling pathway, SOG2	1	S	VLALRSAASPMALSQSQGPLSRSGTPLAAGA	X;X;X;X;X;X;X;X;X;X;Oxidation (M);X;X;X;X;Phospho (STY);X;X;X;X;X;X;X;X;X;X;X;X;X;X;X	XXXXXPPPPPPPPPPPPPPPPPXXXXXXXXX	0.00319512	96.247	96.247	_SAASPM(ox)ALSQS(ph)QGPLSR_	SAASPMALS(0.032)QS(0.968)QGPLSR
gi|472581658	RHTO_04382	30	RAM signalling pathway, SOG2	2	S	SSHAFRPNRSDAPAASPSVSPTTTTSARFNA	X;X;X;X;X;X;X;X;X;X;X;X;X;X;X;Phospho (STY);X;Phospho (STY);X;Phospho (STY);X;X;X;X;X;X;X;X;X;X;X	XXXXXXXXXPPPPPPPPPPPPPPPPPPPXXX	1.4e-14	155.8	155.8	_SDAPAAS(ph)PS(ph)VSPTTTTSAR_	SDAPAAS(1)PS(0.857)VS(0.126)PT(0.006)T(0.006)T(0.002)T(0.002)S(0.002)AR
gi|472581658	RHTO_04382	32	RAM signalling pathway, SOG2	2	S	HAFRPNRSDAPAASPSVSPTTTTSARFNAAL	X;X;X;X;X;X;X;X;X;X;X;X;X;Phospho (STY);X;Phospho (STY);X;X;X;X;X;X;X;X;X;X;X;X;X;X;X	XXXXXXXPPPPPPPPPPPPPPPPPPPXXXXX	1.4e-14	155.8	155.8	_SDAPAAS(ph)PS(ph)VSPTTTTSAR_	SDAPAAS(1)PS(0.857)VS(0.126)PT(0.006)T(0.006)T(0.002)T(0.002)S(0.002)AR
gi|472581658	RHTO_04382	34	RAM signalling pathway, SOG2	2	S	FRPNRSDAPAASPSVSPTTTTSARFNAALAS	X;X;X;X;X;X;X;X;X;X;X;Phospho (STY);X;X;X;Phospho (STY);X;X;X;X;X;X;X;X;X;X;X;X;X;X;X	XXXXXPPPPPPPPPPPPPPPPPPPXXXXXXX	1.59e-13	155.11	155.11	_SDAPAAS(ph)PSVS(ph)PTTTTSAR_	SDAPAAS(1)PS(0.064)VS(0.877)PT(0.028)T(0.022)T(0.001)T(0.005)S(0.004)AR
gi|472581668	RHTO_04392	392	parasitic phase-specific protein psp-1	1;2	S	GVVTDGSPTTMVERGSLRSRRGSGFERTNSY	X;X;X;X;X;X;X;X;X;X;Oxidation (M);X;X;X;X;Phospho (STY);X;X;Phospho (STY);X;X;X;X;X;X;X;X;X;X;X;X	PPPPPPPPPPPPPPPPPPPPXXXXXXXXXXX	0.000423463	88.541	75.224	_ETDGDEGVVTDGSPTTM(ox)VERGS(ph)LRS(ph)R_	ETDGDEGVVT(0.001)DGS(0.01)PT(0.01)T(0.012)MVERGS(0.985)LRS(0.982)R
gi|472581668	RHTO_04392	395	parasitic phase-specific protein psp-1	2	S	TDGSPTTMVERGSLRSRRGSGFERTNSYGAK	X;X;X;X;X;Phospho (STY);X;Oxidation (M);X;X;X;X;Phospho (STY);X;X;Phospho (STY);X;X;X;X;X;X;X;X;X;X;X;X;X;X;X	PPPPPPPPPPPPPPPPPXXXXXXXXXXXXXX	0.000930196	78.987	75.224	_ETDGDEGVVTDGSPTTM(ox)VERGS(ph)LRS(ph)R_	ETDGDEGVVT(0.001)DGS(0.01)PT(0.01)T(0.012)MVERGS(0.985)LRS(0.982)R
gi|472581676	RHTO_04400	423	hypothetical protein	2	S	RSTWSAAIGAGRGGTSVRSRPLEDEASVAGV	X;X;X;X;Phospho (STY);X;X;X;X;X;X;X;X;X;X;X;X;X;X;X;X;X;X;X;X;X;X;X;X;X;X	XXXXXXXXXXXXXXXXXXXXXXXXXXXXXXX	0.00247898	78.272	78.272	_GGT(ph)SVRS(ph)RPLEDEASVAGVPGESTSR_	GGT(0.543)S(0.543)VRS(0.914)RPLEDEASVAGVPGESTSR
gi|472581676	RHTO_04400	426	hypothetical protein	2	S	WSAAIGAGRGGTSVRSRPLEDEASVAGVPGE	X;Phospho (STY);X;X;X;X;X;X;X;X;X;Phospho (STY);X;X;X;Phospho (STY);X;X;X;X;X;X;X;X;X;X;X;X;X;X;X	XXXXXXXXXPPPPPPPPPPPPPPPPPPPPPP	0.00247898	78.272	74.561	_GGT(ph)SVRS(ph)RPLEDEASVAGVPGESTSR_	GGT(0.516)S(0.516)VRS(0.968)RPLEDEASVAGVPGESTSR
gi|472581677	RHTO_04401	176	E3 ubiquitin-protein ligase BRE1	1	S	KSLLSRLQSLHPSSASPAASDLEDKCRALHA	X;X;X;X;X;X;X;X;X;X;X;X;X;X;X;Phospho (STY);X;X;X;X;X;X;X;X;X;X;X;X;X;X;X	XXXXXXPPPPPPPPPPPPPPPPPPPXXXXXX	0.00274018	83.064	83.064	_LQSLHPSSAS(ph)PAASDLEDK_	LQSLHPS(0.003)S(0.003)AS(0.994)PAASDLEDK
gi|472581679	RHTO_04403	181	Arf GTPase activating protein		S	KAAATTSIDLLSAAPSTGRPSSSSSARSTPA	X;X;X;X;X;X;X;X;X;X;X;X;X;X;X;Phospho (STY);Phospho (STY);X;X;X;X;Phospho (STY);X;Phospho (STY);X;X;X;X;X;X;X	PPPPPPPPPPPPPPPPPPPPPPPPPPPXXXX	0.00300463	62.064	52.03	_KAAATTSIDLLSAAPS(ph)TGRPSS(ph)SSSAR_	KAAATTSIDLLS(0.001)AAPS(0.436)T(0.436)GRPS(0.15)S(0.244)S(0.244)S(0.244)S(0.244)AR
gi|472581679	RHTO_04403	186	Arf GTPase activating protein		S	TSIDLLSAAPSTGRPSSSSSARSTPAPPKPA	X;X;X;X;X;X;X;X;X;X;X;X;X;X;X;Phospho (STY);X;X;X;Phospho (STY);X;X;X;X;X;X;X;X;X;X;X	PPPPPPPPPPPPPPPPPPPPPPXXXXXXXXX	0.00300463	62.064	49.937	_KAAATTSIDLLSAAPSTGRPS(ph)SSSS(ph)AR_	KAAATTSIDLLSAAPS(0.041)T(0.044)GRPS(0.326)S(0.27)S(0.273)S(0.178)S(0.868)AR
gi|472581679	RHTO_04403	187	Arf GTPase activating protein		S	SIDLLSAAPSTGRPSSSSSARSTPAPPKPAQ	X;X;X;X;X;X;X;X;X;Phospho (STY);X;X;X;X;X;Phospho (STY);X;X;X;X;X;X;X;X;X;X;X;X;X;X;X	PPPPPPPPPPPPPPPPPPPPPXXXXXXXXXX	0.00300463	62.064	45.395	_KAAATTSIDLLSAAPS(ph)T(ph)GRPSSSSSAR_	KAAATTSIDLLS(0.001)AAPS(0.299)T(0.299)GRPS(0.299)S(0.275)S(0.275)S(0.275)S(0.275)AR
gi|472581679	RHTO_04403	188	Arf GTPase activating protein		S	IDLLSAAPSTGRPSSSSSARSTPAPPKPAQD	X;X;X;X;X;X;X;X;X;X;X;X;X;X;X;Phospho (STY);X;Phospho (STY);X;X;X;X;X;X;X;X;X;X;X;X;X	PPPPPPPPPPPPPPPPPPPPXXXXXXXXXXX	0.00300463	62.064	40.318	_KAAATTSIDLLSAAPSTGRPSSS(ph)SS(ph)AR_	KAAATTSIDLLS(0.002)AAPS(0.058)T(0.201)GRPS(0.247)S(0.232)S(0.333)S(0.207)S(0.72)AR
gi|472581679	RHTO_04403	189	Arf GTPase activating protein		S	DLLSAAPSTGRPSSSSSARSTPAPPKPAQDS	X;X;X;X;X;X;X;Phospho (STY);X;X;X;X;X;X;X;Phospho (STY);X;X;X;X;X;X;X;X;X;X;X;X;X;X;X	PPPPPPPPPPPPPPPPPPPXXXXXXXXXXXX	0.00300463	62.064	48.088	_KAAATTSIDLLSAAPS(ph)TGRPSSSS(ph)SAR_	KAAATTSIDLLS(0.001)AAPS(0.278)T(0.25)GRPS(0.223)S(0.197)S(0.124)S(0.489)S(0.438)AR
gi|472581679	RHTO_04403	190	Arf GTPase activating protein	2	S	LLSAAPSTGRPSSSSSARSTPAPPKPAQDSL	X;X;X;X;X;X;X;X;X;X;X;Phospho (STY);X;Phospho (STY);X;Phospho (STY);X;X;X;X;X;X;X;X;X;X;X;X;X;X;X	PPPPPPPPPPPPPPPPPPXXXXXXXXXXXXX	0.00300463	62.064	49.937	_KAAATTSIDLLSAAPSTGRPS(ph)SSSS(ph)AR_	KAAATTSIDLLSAAPS(0.041)T(0.044)GRPS(0.326)S(0.27)S(0.273)S(0.178)S(0.868)AR
gi|472581684	RHTO_04408	359	ATP sulfate adenylyltransferase	1	S	MPVDEIPKGTVTADISGTELRRRLKTGAPIP	X;X;X;X;X;X;X;X;X;X;X;X;X;X;X;Phospho (STY);X;X;X;X;X;X;X;X;X;X;X;X;X;X;X	XXXXXXXXPPPPPPPPPPPPPXXXXXXXXXX	0.000307292	142.39	142.39	_GTVTADIS(ph)GTELR_	GTVTADIS(0.974)GT(0.026)ELR
gi|472581687	RHTO_04411	314	guanine nucleotide binding protein (G protein), alpha o polypeptide	1	S	AACDYFSSRFVSLNQSTAKQIYVHFTCATDT	X;X;X;X;X;X;X;X;X;X;X;X;X;X;X;Phospho (STY);X;X;X;X;X;X;X;X;X;X;X;X;X;X;X	XXXXXXXXXPPPPPPPPPPXXXXXXXXXXXX	0.00628828	107.65	107.65	_FVSLNQS(ph)TAK_	FVSLNQS(0.847)T(0.153)AK
gi|472581693	RHTO_04417	259	GTPase inhibitor	1;2;3;4	S	KGGAAPGEGRPEKPESDDDSGDSEDDQSFVG	X;X;X;X;X;X;X;X;X;X;X;X;X;X;X;Phospho (STY);X;X;X;Phospho (STY);X;X;Phospho (STY);X;X;X;X;Phospho (STY);X;X;X	XPPPPPPPPPPPPPPPPPPPPPPPPPPPPPP	2.65e-24	135.34	41.818	_GGAAPGEGRPEKPES(ph)DDDS(ph)GDS(ph)EDDQS(ph)FVGGGRR_	GGAAPGEGRPEKPES(1)DDDS(1)GDS(1)EDDQS(1)FVGGGRR
gi|472581693	RHTO_04417	263	GTPase inhibitor	1;2;3;4	S	APGEGRPEKPESDDDSGDSEDDQSFVGGGRR	X;X;X;X;X;X;X;X;X;X;X;Phospho (STY);X;X;X;Phospho (STY);X;X;Phospho (STY);X;X;X;X;Phospho (STY);X;X;X;X;X;X;X	PPPPPPPPPPPPPPPPPPPPPPPPPPPPPPP	9.31e-20	120.15	41.818	_GGAAPGEGRPEKPES(ph)DDDS(ph)GDS(ph)EDDQS(ph)FVGGGRR_	GGAAPGEGRPEKPES(1)DDDS(1)GDS(1)EDDQS(1)FVGGGRR
gi|472581693	RHTO_04417	266	GTPase inhibitor	2;3;4	S	EGRPEKPESDDDSGDSEDDQSFVGGGRRSGI	X;X;X;X;X;X;X;X;Phospho (STY);X;X;X;Phospho (STY);X;X;Phospho (STY);X;X;X;X;Phospho (STY);X;X;X;X;X;X;X;X;X;X	PPPPPPPPPPPPPPPPPPPPPPPPPPPPXXX	2.65e-24	135.34	41.818	_GGAAPGEGRPEKPES(ph)DDDS(ph)GDS(ph)EDDQS(ph)FVGGGRR_	GGAAPGEGRPEKPES(1)DDDS(1)GDS(1)EDDQS(1)FVGGGRR
gi|472581693	RHTO_04417	35	GTPase inhibitor		S	NDALRKHGIIPPKDKSSSRSPSPPPAPSSPT	X;X;X;X;X;X;X;X;X;X;X;X;X;X;X;Phospho (STY);X;X;X;X;X;Phospho (STY);X;X;X;X;X;Phospho (STY);X;X;X	XXXXXXXXXXXXXXXPPPPPPPPPPPPPPPP	1.09e-14	101.66	101.66	_S(ph)SSRSPS(ph)PPPAPS(ph)SPTLSELDLDDLDIERDDAVR_	S(0.296)S(0.296)S(0.296)RS(0.296)PS(0.817)PPPAPS(0.401)S(0.401)PT(0.083)LS(0.115)ELDLDDLDIERDDAVR
gi|472581693	RHTO_04417	36	GTPase inhibitor		S	DALRKHGIIPPKDKSSSRSPSPPPAPSSPTL	X;X;X;X;X;X;X;X;X;X;X;X;X;X;X;X;X;X;X;X;X;X;X;X;X;X;X;X;X;X;X	XXXXXXXXXXXXXXXXXXXXXXXXXXXXXXX	1.09e-14	101.66	101.66	_S(ph)SSRSPS(ph)PPPAPS(ph)SPTLSELDLDDLDIERDDAVR_	S(0.296)S(0.296)S(0.296)RS(0.296)PS(0.817)PPPAPS(0.401)S(0.401)PT(0.083)LS(0.115)ELDLDDLDIERDDAVR
[truncated: 4,395 more rows]
