# Supplementary material for: Regulation of autophagy and lipid accumulation under phosphate limitation in Rhodotorula toruloides
Source: Front Microbiol. 2023 Jan 26;13:1046114. doi: 10.3389/fmicb.2022.1046114 (PMC9908577; doi:10.3389/fmicb.2022.1046114)
Supplement: Supplementary file 8 [file Table_5.doc]

**Table S5. Analysis of phosphorylation motifs using the Motif-X algorithm**

| **#** | **Motif** a, b | **No. of occurrences** | **Literature** |
| --- | --- | --- | --- |
|  | **Serine motifs** |  |  |
| 1. | **[....R..](http://motif-x.med.harvard.edu/cgi-bin/jobres.pl?jobid=20170104-16561-12476579" \l "....R..SP......)sP......** | 312 |  |
| 2. | **[.......](http://motif-x.med.harvard.edu/cgi-bin/jobres.pl?jobid=20170104-16561-12476579" \l ".......SP...R..)sP...R..** | 147 |  |
| 3. | **[.......](http://motif-x.med.harvard.edu/cgi-bin/jobres.pl?jobid=20170104-16561-12476579" \l ".......SPR.....)sPR.....** | 107 | Growth-associated histone HI |
| 4. | **[R......](http://motif-x.med.harvard.edu/cgi-bin/jobres.pl?jobid=20170104-16561-12476579" \l "R......SP......)sP......** | 94 |  |
| 5. | **[....RR.](http://motif-x.med.harvard.edu/cgi-bin/jobres.pl?jobid=20170104-16561-12476579" \l "....RR.S.......)s.......** | 232 | PKA kinase |
| 6. | **[.......](http://motif-x.med.harvard.edu/cgi-bin/jobres.pl?jobid=20170104-16561-12476579" \l ".......SP......)sP......** | 699 | Proline-directed |
| 7. | **[.......S](http://motif-x.med.harvard.edu/cgi-bin/jobres.pl?jobid=20170104-16561-12476579" \l ".......SSP.....)sP.....** | 170 |  |
| 8. | **[....R..](http://motif-x.med.harvard.edu/cgi-bin/jobres.pl?jobid=20170104-16561-12476579" \l "....R..S.D.....)s.D.....** | 56 |  |
| 9. | **[....RS.](http://motif-x.med.harvard.edu/cgi-bin/jobres.pl?jobid=20170104-16561-12476579" \l "....RS.S.......)s.......** | 111 |  |
| 10. | **[.......](http://motif-x.med.harvard.edu/cgi-bin/jobres.pl?jobid=20170104-16561-12476579" \l ".......S.SP....)s.SP....** | 127 |  |
| 11. | **[.......](http://motif-x.med.harvard.edu/cgi-bin/jobres.pl?jobid=20170104-16561-12476579" \l ".......SD.E....)sD.E....** | 151 | CK2 |
| 12. | **[.R..S..](http://motif-x.med.harvard.edu/cgi-bin/jobres.pl?jobid=20170104-16561-12476579" \l ".R..S..S.......)s.......** | 107 |  |
| 13. | **[....R..](http://motif-x.med.harvard.edu/cgi-bin/jobres.pl?jobid=20170104-16561-12476579" \l "....R..S.G.....)s.G.....** | 57 |  |
| 14. | **[.......](http://motif-x.med.harvard.edu/cgi-bin/jobres.pl?jobid=20170104-16561-12476579" \l ".......S...SP..)s...SP..** | 90 |  |
| 15. | **[....RA.](http://motif-x.med.harvard.edu/cgi-bin/jobres.pl?jobid=20170104-16561-12476579" \l "....RA.S.......)s.......** | 66 |  |
| 16. | **[......D](http://motif-x.med.harvard.edu/cgi-bin/jobres.pl?jobid=20170104-16561-12476579" \l "......DS.D.....)s.D.....** | 57 |  |
| 17. | **[....R..](http://motif-x.med.harvard.edu/cgi-bin/jobres.pl?jobid=20170104-16561-12476579" \l "....R..S.......)s.......** | 208 | PKA and PKC kinase |
| 18. | **[.......](http://motif-x.med.harvard.edu/cgi-bin/jobres.pl?jobid=20170104-16561-12476579" \l ".......SD.D....)sD.D....** | 77 | CK2 |
| 19. | **[.....R.](http://motif-x.med.harvard.edu/cgi-bin/jobres.pl?jobid=20170104-16561-12476579" \l ".....R.SS......)sS......** | 64 |  |
| 20. | **[..R..S.](http://motif-x.med.harvard.edu/cgi-bin/jobres.pl?jobid=20170104-16561-12476579" \l "..R..S.S.......)s.......** | 65 |  |
| 21. | **[.......](http://motif-x.med.harvard.edu/cgi-bin/jobres.pl?jobid=20170104-16561-12476579" \l ".......S...D...)s...D...** | 158 |  |
| 22. | **[....S..](http://motif-x.med.harvard.edu/cgi-bin/jobres.pl?jobid=20170104-16561-12476579" \l "....S..S.......)s.......** | 260 |  |
| 23. | **[.......](http://motif-x.med.harvard.edu/cgi-bin/jobres.pl?jobid=20170104-16561-12476579" \l ".......S...E...)s...E...** | 115 |  |
| 24. | **[...S...](http://motif-x.med.harvard.edu/cgi-bin/jobres.pl?jobid=20170104-16561-12476579" \l "...S...S.......)s.......** | 179 |  |
| 25. | **[.....S.](http://motif-x.med.harvard.edu/cgi-bin/jobres.pl?jobid=20170104-16561-12476579" \l ".....S.S.......)s.......** | 136 |  |
| 26. | **[.......](http://motif-x.med.harvard.edu/cgi-bin/jobres.pl?jobid=20170104-16561-12476579" \l ".......S...S...)s...S...** | 111 |  |
| 27. | **[.......](http://motif-x.med.harvard.edu/cgi-bin/jobres.pl?jobid=20170104-16561-12476579" \l ".......S..S....)s..S....** | 87 |  |
| 28. | **[.......](http://motif-x.med.harvard.edu/cgi-bin/jobres.pl?jobid=20170104-16561-12476579" \l ".......S..P....)s..P....** | 52 |  |
| 29. | **[.......](http://motif-x.med.harvard.edu/cgi-bin/jobres.pl?jobid=20170104-16561-12476579" \l ".......S..G....)s..G....** | 51 |  |
|  | Threonine motifs |  |  |
|  | **[....R..](http://motif-x.med.harvard.edu/cgi-bin/jobres.pl?jobid=20161202-5261-27300458" \l "....R..TP......)tP......** | 63 |  |
|  | **[....G..](http://motif-x.med.harvard.edu/cgi-bin/jobres.pl?jobid=20161202-5261-27300458" \l "....G..TP......)tP......** | 53 |  |
|  | **[.......](http://motif-x.med.harvard.edu/cgi-bin/jobres.pl?jobid=20161202-5261-27300458" \l ".......TSP.....)tSP.....** | 79 |  |
|  | **[.......](http://motif-x.med.harvard.edu/cgi-bin/jobres.pl?jobid=20161202-5261-27300458" \l ".......TP.P....)tP.P....** | 49 |  |
|  | **[.....SP](http://motif-x.med.harvard.edu/cgi-bin/jobres.pl?jobid=20161202-5261-27300458" \l ".....SPT.......)t.......** | 51 |  |
|  | **[.....P.](http://motif-x.med.harvard.edu/cgi-bin/jobres.pl?jobid=20161202-5261-27300458" \l ".....P.TP......)tP......** | 37 | MAP kinase |
|  | **[.......](http://motif-x.med.harvard.edu/cgi-bin/jobres.pl?jobid=20161202-5261-27300458" \l ".......TP..S...)tP..S...** | 23 |  |
|  | **[.......](http://motif-x.med.harvard.edu/cgi-bin/jobres.pl?jobid=20161202-5261-27300458" \l ".......T.SP....)t.SP....** | 27 |  |
|  | **[.....R.](http://motif-x.med.harvard.edu/cgi-bin/jobres.pl?jobid=20161202-5261-27300458" \l ".....R.TS......)tS......** | 26 |  |
|  | **[....R.S](http://motif-x.med.harvard.edu/cgi-bin/jobres.pl?jobid=20161202-5261-27300458" \l "....R.ST.......)t.......** | 21 |  |
|  | **[R..S...](http://motif-x.med.harvard.edu/cgi-bin/jobres.pl?jobid=20161202-5261-27300458" \l "R..S...T.......)t.......** | 28 |  |
|  | **[.......](http://motif-x.med.harvard.edu/cgi-bin/jobres.pl?jobid=20161202-5261-27300458" \l ".......TP......)tP......** | 63 | Pro-directed |
|  | **[.......](http://motif-x.med.harvard.edu/cgi-bin/jobres.pl?jobid=20161202-5261-27300458" \l ".......TD......)tD......** | 52 |  |
|  | **[.......](http://motif-x.med.harvard.edu/cgi-bin/jobres.pl?jobid=20161202-5261-27300458" \l ".......TS......)tS......** | 79 |  |
|  | **[.......](http://motif-x.med.harvard.edu/cgi-bin/jobres.pl?jobid=20161202-5261-27300458" \l ".......T.S.....)t.S.....** | 57 |  |
|  | **[....S..](http://motif-x.med.harvard.edu/cgi-bin/jobres.pl?jobid=20161202-5261-27300458" \l "....S..T.......)t.......** | 48 |  |
|  | **[.....S.](http://motif-x.med.harvard.edu/cgi-bin/jobres.pl?jobid=20161202-5261-27300458" \l ".....S.T.......)t.......** | 37 |  |
|  | **[.......](http://motif-x.med.harvard.edu/cgi-bin/jobres.pl?jobid=20161202-5261-27300458" \l ".......TT......)tT......** | 31 |  |

a Motif parameters were set to 10-6significance and a number of occurrences depending on the size of each data set: 50 occurrences for single pSer, 20 for pThr, and 3 for the pTyr, respectively. Lowercase "s" and "t" represent phosphorylated Ser and Thr, respectively. b "." denotes any amino acid. Kinases are listed if described in the literature.
